# Supplementary material
Source: PubMed Central journal article supplement (PMC5577644)
Supplement: NIHMS892660-supplement-Supp_1.pdf [file NIHMS892660-supplement-Supp_1.pdf]

**Supplementary Information 1. QC metrics of whole-exome sequencing and RNA sequencing for Patients 1-1**

**a. Whole exome sequencing**

|                      |                            | Pt1   |       | Pt2   |       | Pt3   |       | Pt4  |       |
|----------------------|----------------------------|-------|-------|-------|-------|-------|-------|------|-------|
|                      |                            | T     | N     | T     | N     | T     | N     | T    | N     |
| <b>Tissue source</b> |                            | CS    | PBMC  | CS    | PBMC  | CS    | PBMC  | FFPE | PBMC  |
| <b>Exome</b>         |                            |       |       |       |       |       |       |      |       |
| <b>Coverage</b>      | Target coverage(mean)      | 222   | 252   | 337   | 342   | 315   | 346   | 285  | 244   |
|                      | % targets with >= 20x      | 94.37 | 94.95 | 94.42 | 94.98 | 93.59 | 94.64 | 95.9 | 96.47 |
|                      | % targets without coverage | 1.19  | 1.15  | 1.3   | 1.22  | 1.25  | 1.19  | 1.67 | 1.52  |
| <b>Quality</b>       | % contamination            | 0.3   | 0.3   | 0.1   | 0.1   | 0.1   | 0.1   | 0.1  | 0.1   |
|                      | % Indel Rate               | 0.01  | 0.01  | 0.01  | 0.01  | 0.01  | 0.01  | 0.01 | 0.01  |
|                      | % Purity                   | 23    |       | 52    |       | 0.93  |       | 43   |       |
|                      | Ploidy                     | 1.91  |       | 1.85  |       | 1.99  |       | 1.86 |       |

\*T: tumor

\*N: germline

\*CS: tumor cell-suspension

\*PBMC: peripheral blood mononuclear cell

\*FFPE: formalin-fixed paraffine-embedded

.0

| Pt5  |       | Pt6   |       | Pt7   |       | Pt8   |       | Pt9   |       | Pt10  |       |
|------|-------|-------|-------|-------|-------|-------|-------|-------|-------|-------|-------|
| T    | N     | T     | N     | T     | N     | T     | N     | T     | N     | T     | N     |
| CS   | PBMC  | FFPE  | PBMC  | CS    | PBMC  | FFPE  | PBMC  | CS    | PBMC  | FFPE  | PBMC  |
| 234  | 307   | 313   | 280   | 243   | 218   | 313   | 280   | 269   | 185   | 233   | 274   |
| 95.9 | 96.59 | 96.32 | 96.47 | 93.64 | 93.35 | 96.32 | 96.47 | 94.61 | 93.04 | 95.98 | 96.86 |
| 1.74 | 1.68  | 1.66  | 1.6   | 1.27  | 1.28  | 1.66  | 1.6   | 1.16  | 1.3   | 1.69  | 1.57  |
| 0.1  | 0.1   | 0.1   | 0.1   | 0.2   | 0.2   | 0.1   | 0.1   | 0.2   | 0.1   | 0.1   | 0.1   |
| 0.01 | 0.01  | 0.01  | 0.01  | 0.01  | 0.01  | 0.01  | 0.01  | 0.01  | 0.01  | 0.01  | 0.01  |
| 78   |       | 45    |       | 19    |       | 45    |       | 70    |       | 71    |       |
| 1.86 |       | 3.37  |       | 2.05  |       | 3.37  |       | 2     |       | 1.94  |       |
