# Supplementary material
Source: PubMed Central journal article supplement (PMC5577644)
Supplement: NIHMS892660-supplement-Supp_2.pdf [file NIHMS892660-supplement-Supp_2.pdf]

**Supplementary Information 2. Somatic mutations identified from Patients 1-10**

| <b>Patient ID</b> | <b>Hugo Symbol</b> | <b>Transcript ID</b> | <b>Variant Classification</b> | <b>Variant Type</b> | <b>NCBI Build</b> |
|-------------------|--------------------|----------------------|-------------------------------|---------------------|-------------------|
| 1                 | CASP5              | uc010ruz.1           | Frame_Shift_Del               | DEL                 | 37                |
| 1                 | MED12L             | uc003eyp.3           | In_Frame_Del                  | DEL                 | 37                |
| 1                 | PTPN21             | uc001xwv.4           | In_Frame_Del                  | DEL                 | 37                |
| 1                 | INSRR              | uc010pht.2           | In_Frame_Ins                  | INS                 | 37                |
| 1                 | TRAPPC12           | uc002qxm.1           | Splice_Site                   | SNP                 | 37                |
| 1                 | TMEM132B           | uc001uhe.1           | Silent                        | SNP                 | 37                |
| 1                 | NDRG3              | uc002xfw.3           | Missense_Mutation             | SNP                 | 37                |
| 1                 | DNAH7              | uc002utj.4           | Nonsense_Mutation             | SNP                 | 37                |
| 1                 | ALB                | uc003hgs.4           | Missense_Mutation             | SNP                 | 37                |
| 1                 | UNC79              | uc001ybv.1           | Silent                        | SNP                 | 37                |
| 1                 | BRD8               | uc003lcf.1           | Missense_Mutation             | SNP                 | 37                |
| 1                 | OR6V1              | uc011ksv.2           | Silent                        | SNP                 | 37                |
| 1                 | MUC17              | uc003uxp.1           | Silent                        | SNP                 | 37                |
| 1                 | FAM9C              | uc004cvh.2           | Splice_Site                   | SNP                 | 37                |
| 1                 | PRTG               | uc002adg.3           | Missense_Mutation             | SNP                 | 37                |
| 1                 | PRICKLE1           | uc010skv.2           | Missense_Mutation             | SNP                 | 37                |
| 1                 | GSS                | uc002xbg.3           | Missense_Mutation             | SNP                 | 37                |
| 1                 | ZNF248             | uc001izd.1           | Silent                        | SNP                 | 37                |
| 1                 | KCNK13             | uc001xye.1           | Silent                        | SNP                 | 37                |
| 1                 | KIF21B             | uc001gvs.2           | Silent                        | SNP                 | 37                |
| 1                 | TMEM26             | uc001jlo.2           | 5'UTR                         | SNP                 | 37                |
| 1                 | FMO1               | uc009wvz.3           | Nonsense_Mutation             | SNP                 | 37                |
| 1                 | ZMYM5              | uc010tcn.1           | Missense_Mutation             | SNP                 | 37                |
| 1                 | MUC17              | uc003uxp.1           | Missense_Mutation             | SNP                 | 37                |
| 1                 | SNCAIP             | uc003ksx.1           | Missense_Mutation             | SNP                 | 37                |
| 1                 | AK124970           | uc001hog.1           | Non-coding_Transcript         | SNP                 | 37                |
| 1                 | abParts            | uc021ser.1           | Non-coding_Transcript         | SNP                 | 37                |
| 1                 | ATP2A1             | uc002dro.1           | Missense_Mutation             | SNP                 | 37                |
| 1                 | JAG2               | uc001yqg.3           | Silent                        | SNP                 | 37                |
| 1                 | ANKRD20A9P         | uc010tcj.1           | Non-coding_Transcript         | SNP                 | 37                |
| 1                 | EDEM2              | uc010zuv.1           | 5'UTR                         | SNP                 | 37                |
| 1                 | INSL6              | uc003zix.3           | Missense_Mutation             | SNP                 | 37                |
| 1                 | PDCD6IP            | uc003cfy.3           | Missense_Mutation             | SNP                 | 37                |
| 1                 | TMEM214            | uc002ria.4           | Missense_Mutation             | SNP                 | 37                |
| 1                 | TRBV29-1           | uc011ksl.1           | Silent                        | SNP                 | 37                |
| 1                 | C15orf48           | uc001zvg.3           | Nonsense_Mutation             | SNP                 | 37                |
| 1                 | PLA2G6             | uc003auy.1           | Intron                        | SNP                 | 37                |
| 1                 | PYGM               | uc001oax.4           | Missense_Mutation             | SNP                 | 37                |
| 1                 | ODZ2               | uc010jld.3           | Silent                        | SNP                 | 37                |
| 1                 | KIAA1033           | uc010swr.2           | Silent                        | SNP                 | 37                |

|   |          |            |                       |     |    |
|---|----------|------------|-----------------------|-----|----|
| 1 | ACPP     | uc003eop.4 | Missense_Mutation     | SNP | 37 |
| 1 | LY6G6F   | uc003nwb.1 | Missense_Mutation     | SNP | 37 |
| 1 | ROBO2    | uc003dpz.3 | Missense_Mutation     | SNP | 37 |
| 1 | SLC26A3  | uc003ver.2 | Missense_Mutation     | SNP | 37 |
| 1 | SMTN     | uc011ale.2 | Silent                | SNP | 37 |
| 1 | ZNF536   | uc002nsu.1 | Missense_Mutation     | SNP | 37 |
| 1 | CPNE6    | uc010tnv.2 | Missense_Mutation     | SNP | 37 |
| 1 | IGF2BP1  | uc002iom.3 | Missense_Mutation     | SNP | 37 |
| 1 | BCLAF1   | uc003qgx.1 | Missense_Mutation     | SNP | 37 |
| 1 | Unknown  |            | IGR                   | SNP | 37 |
| 1 | ITPKB    | uc010pvo.2 | Silent                | SNP | 37 |
| 1 | TTLL3    | uc003btg.3 | Missense_Mutation     | SNP | 37 |
| 1 | CSPP1    | uc003xxi.3 | Silent                | SNP | 37 |
| 1 | Unknown  |            | IGR                   | SNP | 37 |
| 1 | SLITRK1  | uc001vlk.3 | Silent                | SNP | 37 |
| 1 | BCLAF1   | uc003qgx.1 | Missense_Mutation     | SNP | 37 |
| 1 | OR4L1    | uc001vwn.1 | Missense_Mutation     | SNP | 37 |
| 1 | ALMS1    | uc002sje.1 | Missense_Mutation     | SNP | 37 |
| 1 | OR911    | uc001nml.1 | Silent                | SNP | 37 |
| 1 | JARID2   | uc003nbj.3 | Missense_Mutation     | SNP | 37 |
| 1 | PPP1R16A | uc003zdd.3 | Missense_Mutation     | SNP | 37 |
| 1 | KAT6B    | uc001jwn.1 | Silent                | SNP | 37 |
| 1 | CCT8L2   | uc002zlp.1 | Silent                | SNP | 37 |
| 1 | CROCCP2  | uc001azg.1 | Intron                | SNP | 37 |
| 1 | SYNE1    | uc003qox.1 | 3'UTR                 | SNP | 37 |
| 1 | CSMD3    | uc003ynu.3 | Missense_Mutation     | SNP | 37 |
| 1 | DQ576853 | uc011ajp.1 | 5'Flank               | SNP | 37 |
| 1 | KIAA1653 | uc002zrw.1 | Non-coding_Transcript | SNP | 37 |
| 1 | TMPRSS7  | uc010hqb.2 | Missense_Mutation     | SNP | 37 |
| 1 | ECI1     | uc002cpr.3 | 3'UTR                 | SNP | 37 |
| 1 | MUC16    | uc002mkp.3 | Missense_Mutation     | SNP | 37 |
| 1 | SHISA4   | uc001gxa.3 | 3'UTR                 | SNP | 37 |
| 1 | NWD1     | uc002neu.4 | Missense_Mutation     | SNP | 37 |
| 1 | ADCY8    | uc003ytd.4 | Missense_Mutation     | SNP | 37 |
| 1 | KLF12    | uc001vjg.3 | 3'UTR                 | SNP | 37 |
| 1 | BRPF1    | uc003bsf.3 | Missense_Mutation     | SNP | 37 |
| 1 | IFRD2    | uc003czb.3 | Missense_Mutation     | SNP | 37 |
| 1 | LRRK1    | uc002bwr.3 | Silent                | SNP | 37 |
| 1 | ADARB1   | uc002zgy.2 | Missense_Mutation     | SNP | 37 |
| 1 | MECOM    | uc011bpj.1 | Missense_Mutation     | SNP | 37 |
| 1 | CFB      | uc011dor.2 | Silent                | SNP | 37 |
| 1 | PLXNA4   | uc003vra.4 | Silent                | SNP | 37 |
| 1 | GFM2     | uc010izj.1 | Missense_Mutation     | SNP | 37 |

|   |          |            |                       |     |    |
|---|----------|------------|-----------------------|-----|----|
| 1 | LY6G6C   | uc003nwh.3 | 5'UTR                 | SNP | 37 |
| 1 | ESYT2    | uc003wob.1 | 3'UTR                 | SNP | 37 |
| 1 | NLRC4    | uc002roi.3 | Missense_Mutation     | SNP | 37 |
| 1 | BRAF     | uc003vwc.4 | Missense_Mutation     | SNP | 37 |
| 1 | NLRP4    | uc002qmd.4 | Missense_Mutation     | SNP | 37 |
| 1 | NEDD9    | uc010joz.2 | Missense_Mutation     | SNP | 37 |
| 1 | DCAKD    | uc010daa.1 | Missense_Mutation     | SNP | 37 |
| 1 | EPB41L4B | uc004bdz.1 | Nonsense_Mutation     | SNP | 37 |
| 1 | DNAH7    | uc002utj.4 | Nonsense_Mutation     | SNP | 37 |
| 1 | GLYAT    | uc001nnb.3 | Missense_Mutation     | SNP | 37 |
| 1 | CR1      | uc001hfx.3 | Nonsense_Mutation     | SNP | 37 |
| 1 | SEMA3E   | uc003uhy.2 | Silent                | SNP | 37 |
| 1 | CCDC135  | uc002emi.3 | Missense_Mutation     | SNP | 37 |
| 1 | LUM      | uc001tbm.3 | Missense_Mutation     | SNP | 37 |
| 1 | C1orf106 | uc001gvo.3 | Silent                | SNP | 37 |
| 1 | abParts  | uc010yts.2 | Intron                | SNP | 37 |
| 1 | B4GALNT3 | uc001qii.1 | Silent                | SNP | 37 |
| 1 | SDK1     | uc003smx.3 | Silent                | SNP | 37 |
| 1 | MUC16    | uc002mkp.3 | Missense_Mutation     | SNP | 37 |
| 1 | C8A      | uc001cyo.2 | Silent                | SNP | 37 |
| 1 | DDX12P   | uc001qvx.4 | Non-coding_Transcript | SNP | 37 |
| 1 | IRAK3    | uc001sth.3 | Nonsense_Mutation     | SNP | 37 |
| 1 | MSL3P1   | uc010zfn.2 | Silent                | SNP | 37 |
| 1 | CXCR7    | uc010fyq.3 | Missense_Mutation     | SNP | 37 |
| 1 | CRTC3    | uc002bpp.3 | Silent                | SNP | 37 |
| 1 | ZBED4    | uc003bix.2 | Missense_Mutation     | SNP | 37 |
| 1 | EIF4G1   | uc003fnx.3 | 5'UTR                 | SNP | 37 |
| 1 | STAB2    | uc001tjw.3 | Missense_Mutation     | SNP | 37 |
| 1 | NCOA2    | uc003xyn.1 | Silent                | SNP | 37 |
| 1 | ZBED4    | uc003bix.2 | Silent                | SNP | 37 |
| 1 | CHRN3    | uc003xpi.1 | Silent                | SNP | 37 |
| 1 | RUSC2    | uc003zww.3 | Missense_Mutation     | SNP | 37 |
| 1 | SMR3A    | uc003hfg.1 | Missense_Mutation     | SNP | 37 |
| 1 | MCTP2    | uc002btj.3 | Nonsense_Mutation     | SNP | 37 |
| 1 | WDR54    | uc002slb.3 | Missense_Mutation     | SNP | 37 |
| 1 | VPS13D   | uc001atv.3 | Missense_Mutation     | SNP | 37 |
| 1 | TRIM10   | uc003npo.3 | Missense_Mutation     | SNP | 37 |
| 1 | SV2B     | uc002bqv.3 | Missense_Mutation     | SNP | 37 |
| 1 | TTN      | uc021vsy.1 | Missense_Mutation     | SNP | 37 |
| 1 | SGSM1    | uc003abg.2 | Silent                | SNP | 37 |
| 1 | ITGA7    | uc001shh.3 | Silent                | SNP | 37 |
| 1 | TLR8     | uc004cvd.3 | Missense_Mutation     | SNP | 37 |
| 1 | DQ576853 | uc011ajp.1 | 5'Flank               | SNP | 37 |

|   |          |            |                   |     |    |
|---|----------|------------|-------------------|-----|----|
| 1 | SHISA4   | uc001gxa.3 | 3'UTR             | SNP | 37 |
| 1 | PRRC2C   | uc010pmg.2 | Missense_Mutation | SNP | 37 |
| 1 | FAM114A2 | uc003lvb.3 | Missense_Mutation | SNP | 37 |
| 1 | PRB1     | uc001qzw.1 | Missense_Mutation | SNP | 37 |
| 1 | FBXO40   | uc003eeg.2 | 3'UTR             | SNP | 37 |
| 1 | AOC4     | uc002ibw.1 | Missense_Mutation | SNP | 37 |
| 1 | MYH2     | uc010coi.3 | Missense_Mutation | SNP | 37 |
| 1 | APC      | uc003kpz.4 | Nonsense_Mutation | SNP | 37 |
| 1 | B3GALT1  | uc002udz.1 | Nonsense_Mutation | SNP | 37 |
| 1 | RUNX1    | uc010gmu.3 | Silent            | SNP | 37 |
| 1 | TTN      | uc021vsy.1 | Silent            | SNP | 37 |
| 1 | FGFR3    | uc003gdu.2 | Silent            | SNP | 37 |
| 1 | KCNC1    | uc009yh.1  | Missense_Mutation | SNP | 37 |
| 1 | WBCR17   | uc003tvy.3 | 3'UTR             | SNP | 37 |
| 1 | RELT     | uc001otv.3 | Missense_Mutation | SNP | 37 |
| 1 | ATP6V0D2 | uc003ydp.1 | Missense_Mutation | SNP | 37 |
| 1 | SLC22A25 | uc001nwr.1 | Missense_Mutation | SNP | 37 |
| 1 | OR5H15   | uc011bgu.2 | Missense_Mutation | SNP | 37 |
| 1 | IGFN1    | uc001gwc.3 | Missense_Mutation | SNP | 37 |
| 1 | PLAUR    | uc002oxf.2 | Silent            | SNP | 37 |
| 1 | C1QTNF9  | uc001upj.3 | Missense_Mutation | SNP | 37 |
| 1 | MAP3K4   | uc003qtn.3 | Missense_Mutation | SNP | 37 |
| 1 | RGL1     | uc001gqm.3 | Silent            | SNP | 37 |
| 1 | NAT16    | uc003uxy.2 | Missense_Mutation | SNP | 37 |
| 1 | CROCCP2  | uc001azg.1 | Intron            | SNP | 37 |
| 1 | ZNF318   | uc003oux.3 | Silent            | SNP | 37 |
| 1 | COL4A6   | uc004enw.4 | Silent            | SNP | 37 |
| 1 | OR5H6    | uc003dsi.1 | Silent            | SNP | 37 |
| 1 | ULK1     | uc001uje.3 | Missense_Mutation | SNP | 37 |
| 1 | C3       | uc002mfm.3 | Missense_Mutation | SNP | 37 |
| 1 | Unknown  |            | IGR               | SNP | 37 |
| 1 | CACNA1B  | uc004cog.3 | Silent            | SNP | 37 |
| 1 | ATP2A1   | uc002dro.1 | Nonsense_Mutation | SNP | 37 |
| 1 | VRTN     | uc001xpw.4 | Silent            | SNP | 37 |
| 1 | ZNF610   | uc002pyx.4 | Missense_Mutation | SNP | 37 |
| 1 | HDAC5    | uc002ifg.1 | 5'UTR             | SNP | 37 |
| 1 | HTR3A    | uc010rx.2  | Silent            | SNP | 37 |
| 1 | SLC7A9   | uc002ntv.4 | Missense_Mutation | SNP | 37 |
| 1 | Unknown  |            | IGR               | SNP | 37 |
| 1 | RASGRP4  | uc021uub.1 | Silent            | SNP | 37 |
| 1 | BCRP3    | uc011ajv.2 | Intron            | SNP | 37 |
| 1 | JARID2   | uc003nbj.3 | Missense_Mutation | SNP | 37 |
| 1 | ADD1     | uc003gfq.3 | Missense_Mutation | SNP | 37 |



|   |           |            |                   |     |    |
|---|-----------|------------|-------------------|-----|----|
| 1 | C14orf102 | uc001xyi.2 | Missense_Mutation | SNP | 37 |
| 1 | KANSL1    | uc002ikc.3 | Silent            | SNP | 37 |
| 1 | MYH9      | uc003apg.3 | Silent            | SNP | 37 |
| 1 | ARHGEF15  | uc002glc.3 | Missense_Mutation | SNP | 37 |
| 1 | PCDHGC5   | uc003lju.2 | Silent            | SNP | 37 |
| 1 | CYP4A22   | uc001cqy.1 | Missense_Mutation | SNP | 37 |
| 1 | ABCC4     | uc001vmd.4 | Missense_Mutation | SNP | 37 |
| 1 | OR4C15    | uc010rig.2 | Missense_Mutation | SNP | 37 |
| 1 | FANCM     | uc001wwd.4 | Missense_Mutation | SNP | 37 |
| 1 | SCN4B     | uc001pse.3 | Splice_Site       | SNP | 37 |
| 2 | HFM1      | uc001doa.4 | Frame_Shift_Del   | DEL | 37 |
| 2 | ABCD3     | uc010oto.2 | Frame_Shift_Del   | DEL | 37 |
| 2 | MAP4K4    | uc002tbc.3 | Frame_Shift_Del   | DEL | 37 |
| 2 | RIF1      | uc002txm.3 | Frame_Shift_Del   | DEL | 37 |
| 2 | CCDC80    | uc003dzf.3 | Frame_Shift_Del   | DEL | 37 |
| 2 | ATP13A4   | uc003ftd.3 | Frame_Shift_Del   | DEL | 37 |
| 2 | GRINA     | uc003zan.1 | Frame_Shift_Del   | DEL | 37 |
| 2 | BTAF1     | uc001khr.3 | Frame_Shift_Del   | DEL | 37 |
| 2 | NF1       | uc002hgg.3 | Frame_Shift_Del   | DEL | 37 |
| 2 | CDK5R1    | uc002hhn.3 | Frame_Shift_Del   | DEL | 37 |
| 2 | LUC7L3    | uc002isq.3 | Frame_Shift_Del   | DEL | 37 |
| 2 | ILF3      | uc002mpo.3 | Frame_Shift_Del   | DEL | 37 |
| 2 | ZNF473    | uc002prn.3 | Frame_Shift_Del   | DEL | 37 |
| 2 | ADM2      | uc003blj.3 | Frame_Shift_Del   | DEL | 37 |
| 2 | FOXR2     | uc004duo.3 | Missense_Mutation | SNP | 37 |
| 2 | NLRP10    | uc001mfv.1 | Missense_Mutation | SNP | 37 |
| 2 | SCARA5    | uc003xgj.3 | Silent            | SNP | 37 |
| 2 | GNAT1     | uc003cym.2 | 5'UTR             | SNP | 37 |
| 2 | ZNF280A   | uc002zwe.3 | Silent            | SNP | 37 |
| 2 | COL9A1    | uc003pfg.4 | Missense_Mutation | SNP | 37 |
| 2 | SEC31B    | uc001krc.1 | Missense_Mutation | SNP | 37 |
| 2 | PTPN14    | uc001hkk.2 | Nonsense_Mutation | SNP | 37 |
| 2 | ITGB5     | uc003eho.3 | Missense_Mutation | SNP | 37 |
| 2 | ESR2      | uc001xha.1 | Missense_Mutation | SNP | 37 |
| 2 | MC3R      | uc002xxb.2 | Silent            | SNP | 37 |
| 2 | TEPP      | uc002emv.4 | Silent            | SNP | 37 |
| 2 | GDF2      | uc001jfa.1 | Silent            | SNP | 37 |
| 2 | PIK3R2    | uc002nia.1 | Missense_Mutation | SNP | 37 |
| 2 | EPHA10    | uc009vvi.3 | Missense_Mutation | SNP | 37 |
| 2 | PLEKHM3   | uc002vcl.2 | Nonsense_Mutation | SNP | 37 |
| 2 | ANKRD26   | uc009xku.1 | Missense_Mutation | SNP | 37 |
| 2 | SYT1      | uc001sys.3 | Missense_Mutation | SNP | 37 |
| 2 | RELN      | uc022ajr.1 | Silent            | SNP | 37 |

|   |          |            |                   |     |    |
|---|----------|------------|-------------------|-----|----|
| 2 | DOT1L    | uc002lvb.4 | Silent            | SNP | 37 |
| 2 | EPX      | uc002ivq.3 | Nonsense_Mutation | SNP | 37 |
| 2 | CACNA1C  | uc001qkm.2 | Missense_Mutation | SNP | 37 |
| 2 | OR2S2    | uc011lpi.2 | Missense_Mutation | SNP | 37 |
| 2 | SAMD4B   | uc002olb.3 | Silent            | SNP | 37 |
| 2 | OTOL1    | uc011bpb.2 | Missense_Mutation | SNP | 37 |
| 2 | COL6A5   | uc010htj.1 | Silent            | SNP | 37 |
| 2 | CDHR5    | uc001lqj.3 | Missense_Mutation | SNP | 37 |
| 2 | GPAM     | uc009xyx.2 | Missense_Mutation | SNP | 37 |
| 2 | TAS2R9   | uc001qyx.3 | Missense_Mutation | SNP | 37 |
| 2 | SLC35E1  | uc010xph.2 | 3'UTR             | SNP | 37 |
| 2 | EMR1     | uc002mfw.3 | 3'UTR             | SNP | 37 |
| 2 | KLHL14   | uc002kxm.1 | Missense_Mutation | SNP | 37 |
| 2 | KIAA0947 | uc003jdm.4 | Missense_Mutation | SNP | 37 |
| 2 | PKD1     | uc002cos.1 | Missense_Mutation | SNP | 37 |
| 2 | OR4K15   | uc010tkx.2 | Missense_Mutation | SNP | 37 |
| 2 | OR5D18   | uc010rin.2 | Missense_Mutation | SNP | 37 |
| 2 | ZIM3     | uc002qnz.1 | Missense_Mutation | SNP | 37 |
| 2 | ZBTB7C   | uc010dvn.3 | Missense_Mutation | SNP | 37 |
| 2 | SV2C     | uc003kei.1 | Missense_Mutation | SNP | 37 |
| 2 | CACNG6   | uc002qct.3 | Silent            | SNP | 37 |
| 2 | SLC1A7   | uc021onn.1 | Missense_Mutation | SNP | 37 |
| 2 | PDE4D    | uc003jsa.2 | Missense_Mutation | SNP | 37 |
| 2 | MX2      | uc002yzf.1 | Silent            | SNP | 37 |
| 2 | AOX1     | uc002uvx.3 | Missense_Mutation | SNP | 37 |
| 2 | HEPHL1   | uc001pep.2 | Missense_Mutation | SNP | 37 |
| 2 | SAMD9L   | uc003umh.1 | Missense_Mutation | SNP | 37 |
| 2 | DQ576853 | uc011ajp.1 | 5'Flank           | SNP | 37 |
| 2 | PPARD    | uc003okn.3 | 3'UTR             | SNP | 37 |
| 2 | GRIN2A   | uc002czo.4 | 3'UTR             | SNP | 37 |
| 2 | POTEA    | uc003xpz.1 | Missense_Mutation | SNP | 37 |
| 2 | TNFRSF1B | uc001att.3 | Missense_Mutation | SNP | 37 |
| 2 | PDZD2    | uc003jhl.3 | Missense_Mutation | SNP | 37 |
| 2 | COL24A1  | uc001dlj.3 | Silent            | SNP | 37 |
| 2 | POLR2A   | uc002ghf.4 | Missense_Mutation | SNP | 37 |
| 2 | HPR      | uc002fby.3 | Missense_Mutation | SNP | 37 |
| 2 | C2orf71  | uc002rmt.2 | Missense_Mutation | SNP | 37 |
| 2 | SORCS1   | uc001kyl.3 | Silent            | SNP | 37 |
| 2 | MUC17    | uc003uxp.1 | Missense_Mutation | SNP | 37 |
| 2 | ZNF517   | uc010mgd.1 | 5'UTR             | SNP | 37 |
| 2 | PSG7     | uc002ovl.4 | Missense_Mutation | SNP | 37 |
| 2 | ZC3H7B   | uc003azw.3 | Silent            | SNP | 37 |
| 2 | LRP1     | uc001snd.3 | Silent            | SNP | 37 |

|   |           |            |                   |     |    |
|---|-----------|------------|-------------------|-----|----|
| 2 | FAM13B    | uc003lbz.2 | Silent            | SNP | 37 |
| 2 | UGT3A2    | uc003jjz.2 | Silent            | SNP | 37 |
| 2 | FYCO1     | uc011bal.1 | Silent            | SNP | 37 |
| 2 | NLRP3     | uc001icr.3 | Missense_Mutation | SNP | 37 |
| 2 | CASC5     | uc010bbs.1 | Missense_Mutation | SNP | 37 |
| 2 | PKD1      | uc002cos.1 | Silent            | SNP | 37 |
| 2 | NAALAD2   | uc001pdf.4 | 5'UTR             | SNP | 37 |
| 2 | TBX22     | uc010nmg.1 | Missense_Mutation | SNP | 37 |
| 2 | CYB5R2    | uc001mfm.3 | Missense_Mutation | SNP | 37 |
| 2 | MBD4      | uc003emh.1 | Missense_Mutation | SNP | 37 |
| 2 | MUC16     | uc002mkp.3 | Silent            | SNP | 37 |
| 2 | MTHFD2    | uc002skk.3 | Missense_Mutation | SNP | 37 |
| 2 | IPO4      | uc001wmv.1 | Missense_Mutation | SNP | 37 |
| 2 | SIRT1     | uc001jnd.3 | Missense_Mutation | SNP | 37 |
| 2 | AGAP3     | uc003wjg.1 | Missense_Mutation | SNP | 37 |
| 2 | ANK3      | uc001jky.3 | Silent            | SNP | 37 |
| 2 | RGL3      | uc002mro.2 | Silent            | SNP | 37 |
| 2 | AVEN      | uc001zhj.3 | Missense_Mutation | SNP | 37 |
| 2 | ANK3      | uc001jky.3 | Missense_Mutation | SNP | 37 |
| 2 | KRTAP5-4  | uc009ycy.1 | Silent            | SNP | 37 |
| 2 | COQ5      | uc001tyn.3 | Silent            | SNP | 37 |
| 2 | FBXO40    | uc003eeg.2 | Silent            | SNP | 37 |
| 2 | C14orf101 | uc001xcm.3 | Missense_Mutation | SNP | 37 |
| 2 | HSD3B2    | uc001ehs.3 | 5'UTR             | SNP | 37 |
| 2 | NEURL     | uc001kxh.3 | Silent            | SNP | 37 |
| 2 | INA       | uc001kws.3 | Missense_Mutation | SNP | 37 |
| 2 | USH1C     | uc001mnf.3 | Missense_Mutation | SNP | 37 |
| 2 | MUC16     | uc002mkp.3 | Silent            | SNP | 37 |
| 2 | ARHGAP30  | uc001fxl.3 | Missense_Mutation | SNP | 37 |
| 2 | KLF10     | uc011lhk.1 | 3'UTR             | SNP | 37 |
| 2 | MARCH11   | uc003jfo.2 | Silent            | SNP | 37 |
| 2 | COL6A3    | uc002vwl.2 | Missense_Mutation | SNP | 37 |
| 2 | C17orf70  | uc002kaq.3 | Missense_Mutation | SNP | 37 |
| 2 | PRUNE2    | uc010mpk.3 | Missense_Mutation | SNP | 37 |
| 2 | FAM181A   | uc001ybz.2 | Silent            | SNP | 37 |
| 2 | ARHGAP17  | uc002dnb.3 | Nonsense_Mutation | SNP | 37 |
| 2 | CA3       | uc003ydj.3 | Missense_Mutation | SNP | 37 |
| 2 | FGF7      | uc001zxn.3 | Missense_Mutation | SNP | 37 |
| 2 | POTEE     | uc002tsn.2 | Silent            | SNP | 37 |
| 2 | LATS2     | uc009zsz.3 | Missense_Mutation | SNP | 37 |
| 2 | ZDBF2     | uc002vbp.2 | Missense_Mutation | SNP | 37 |
| 2 | BLK       | uc003wty.3 | Missense_Mutation | SNP | 37 |
| 2 | WEE1      | uc001mhs.3 | 3'UTR             | SNP | 37 |

|   |           |            |                       |     |    |
|---|-----------|------------|-----------------------|-----|----|
| 2 | AKAP6     | uc001wrq.3 | Missense_Mutation     | SNP | 37 |
| 2 | IGHE      | uc001yrw.1 | Intron                | SNP | 37 |
| 2 | IGHE      | uc001yrw.1 | Intron                | SNP | 37 |
| 2 | SCN3A     | uc002ucx.3 | Missense_Mutation     | SNP | 37 |
| 2 | PRR23A    | uc011bms.2 | Missense_Mutation     | SNP | 37 |
| 2 | VTI1A     | uc001kzz.3 | 3'UTR                 | SNP | 37 |
| 2 | LEPR      | uc001dci.3 | Missense_Mutation     | SNP | 37 |
| 2 | LYPD6     | uc021vqt.1 | Missense_Mutation     | SNP | 37 |
| 2 | UGT1A1    | uc002vur.3 | Nonsense_Mutation     | SNP | 37 |
| 2 | CDCP2     | uc001cww.1 | Silent                | SNP | 37 |
| 2 | GLT8D1    | uc003dfi.4 | Missense_Mutation     | SNP | 37 |
| 2 | KLHL1     | uc001vip.3 | Silent                | SNP | 37 |
| 2 | HIST1H2AE | uc003nha.1 | Silent                | SNP | 37 |
| 2 | MIR17HG   | uc001vlq.1 | Intron                | SNP | 37 |
| 2 | LRP1B     | uc002tvj.1 | Silent                | SNP | 37 |
| 2 | SH3GL3    | uc002bjv.3 | Silent                | SNP | 37 |
| 2 | PCDHB8    | uc011dai.2 | Silent                | SNP | 37 |
| 2 | CWH43     | uc003gyv.3 | Missense_Mutation     | SNP | 37 |
| 2 | FRG1B     | uc010ztl.1 | Missense_Mutation     | SNP | 37 |
| 2 | ARID1A    | uc001bmv.1 | Nonsense_Mutation     | SNP | 37 |
| 2 | NUP210    | uc003bxv.1 | Missense_Mutation     | SNP | 37 |
| 2 | KIAA2022  | uc004eby.3 | Missense_Mutation     | SNP | 37 |
| 2 | TRIM42    | uc003eto.2 | Silent                | SNP | 37 |
| 2 | BCL11B    | uc001yga.3 | Missense_Mutation     | SNP | 37 |
| 2 | XIRP2     | uc002udx.3 | Silent                | SNP | 37 |
| 2 | MKL1      | uc003ayw.1 | Missense_Mutation     | SNP | 37 |
| 2 | FEZ1      | uc010sbc.2 | 3'UTR                 | SNP | 37 |
| 2 | PTPRN2    | uc011kwa.2 | Missense_Mutation     | SNP | 37 |
| 2 | ZNF727    | uc011kdm.2 | Missense_Mutation     | SNP | 37 |
| 2 | abParts   | uc021ser.1 | Non-coding_Transcript | SNP | 37 |
| 2 | PTPN4     | uc002tmf.1 | Splice_Site           | SNP | 37 |
| 2 | FGFR2     | uc021pzy.1 | Missense_Mutation     | SNP | 37 |
| 2 | S1PR2     | uc002mnl.2 | Silent                | SNP | 37 |
| 2 | CYP2B6    | uc002opr.1 | Silent                | SNP | 37 |
| 2 | GDF10     | uc001jfb.3 | Silent                | SNP | 37 |
| 2 | C14orf49  | uc001yei.4 | Missense_Mutation     | SNP | 37 |
| 2 | TRIML1    | uc003izm.1 | Missense_Mutation     | SNP | 37 |
| 2 | TRAPPC8   | uc002kxc.4 | Missense_Mutation     | SNP | 37 |
| 2 | ANKRD30B  | uc010dlo.2 | Splice_Site           | SNP | 37 |
| 2 | DLG2      | uc001pak.2 | Missense_Mutation     | SNP | 37 |
| 2 | ZNF496    | uc009xgv.3 | Missense_Mutation     | SNP | 37 |
| 2 | ITGAD     | uc010cap.1 | Silent                | SNP | 37 |
| 2 | CENPM     | uc003bbn.3 | Missense_Mutation     | SNP | 37 |

|   |           |             |                   |     |    |
|---|-----------|-------------|-------------------|-----|----|
| 2 | F5        | uc001ggg.1  | 3'UTR             | SNP | 37 |
| 2 | CMYA5     | uc003kgc.3  | Missense_Mutation | SNP | 37 |
| 2 | SIRPB2    | uc002wfg.2  | 3'UTR             | SNP | 37 |
| 2 | MNDA      | uc001fsz.1  | Missense_Mutation | SNP | 37 |
| 2 | TTN       | uc021vsy.1  | Missense_Mutation | SNP | 37 |
| 2 | FAM129A   | uc001gra.3  | Silent            | SNP | 37 |
| 2 | KLF10     | uc011lhk.1  | Missense_Mutation | SNP | 37 |
| 2 | C9orf85   | uc004ain.3  | 3'UTR             | SNP | 37 |
| 2 | ITGB4     | uc002jpg.3  | Silent            | SNP | 37 |
| 2 | KCNJ8     | uc001rff.3  | Missense_Mutation | SNP | 37 |
| 2 | MYO15A    | uc021trm.1  | Silent            | SNP | 37 |
| 2 | GABRB2    | uc003lys.1  | Silent            | SNP | 37 |
| 2 | TENC1     | uc001sbn.3  | Silent            | SNP | 37 |
| 2 | RASGRP3   | uc002rox.3  | Silent            | SNP | 37 |
| 2 | LILRB3    | uc002qfd.3  | 3'UTR             | SNP | 37 |
| 2 | SEZ6      | uc002hdp.2  | Splice_Site       | SNP | 37 |
| 2 | EPPK1     | uc003zaa.1  | Silent            | SNP | 37 |
| 2 | ARHGAP11A | uc001zgy.1  | Missense_Mutation | SNP | 37 |
| 2 | ZFHX4     | uc003yau.2  | Silent            | SNP | 37 |
| 2 | ASB6      | uc004byf.2  | Missense_Mutation | SNP | 37 |
| 2 | FAM71B    | uc003lwn.3  | Missense_Mutation | SNP | 37 |
| 2 | MUCL1     | uc001sgk.3  | Missense_Mutation | SNP | 37 |
| 2 | CHD1      | uc003knf.3  | Missense_Mutation | SNP | 37 |
| 2 | SP110     | uc021vxx.1  | Missense_Mutation | SNP | 37 |
| 2 | PLXNB2    | uc003bkv.4  | Splice_Site       | SNP | 37 |
| 2 | GSDMC     | uc003ysr.3  | Silent            | SNP | 37 |
| 2 | PCDHB17   | uc003lis.3  | Missense_Mutation | SNP | 37 |
| 2 | ERG       | uc002yxa.3  | 5'UTR             | SNP | 37 |
| 2 | FREM1     | uc003zlm.3  | Nonsense_Mutation | SNP | 37 |
| 2 | ABCD2     | uc001rmb.2  | Missense_Mutation | SNP | 37 |
| 2 | SLC4A10   | uc002ubx.4  | Silent            | SNP | 37 |
| 2 | OR52M1    | uc010qyf.2  | Missense_Mutation | SNP | 37 |
| 2 | TTN       | uc021vsy.1  | Missense_Mutation | SNP | 37 |
| 2 | SYT9      | uc001mfe.3  | Missense_Mutation | SNP | 37 |
| 2 | TEK       | uc003zqi.4  | Missense_Mutation | SNP | 37 |
| 2 | KCNG4     | uc010voc.2  | Missense_Mutation | SNP | 37 |
| 2 | GLT25D1   | uc002nhc.1  | Nonsense_Mutation | SNP | 37 |
| 2 | SGPL1     | uc001jrm.3  | Silent            | SNP | 37 |
| 2 | ZNF410    | uc010arz.2  | Silent            | SNP | 37 |
| 2 | FAM179A   | uc010ezl.3  | Missense_Mutation | SNP | 37 |
| 2 | ECT2L     | uc003qif.2  | Missense_Mutation | SNP | 37 |
| 2 | CCDC136   | uc003vvnv.2 | Missense_Mutation | SNP | 37 |
| 2 | ZNF525    | uc010eqn.3  | 3'UTR             | SNP | 37 |

|   |               |            |                   |     |    |
|---|---------------|------------|-------------------|-----|----|
| 2 | DMBT1         | uc001lgl.1 | Missense_Mutation | SNP | 37 |
| 2 | ELAVL4        | uc001csa.3 | Missense_Mutation | SNP | 37 |
| 2 | RFX7          | uc010bfn.3 | Missense_Mutation | SNP | 37 |
| 2 | WRNIP1        | uc003mtz.3 | Missense_Mutation | SNP | 37 |
| 2 | PA2G4         | uc001sjm.3 | Missense_Mutation | SNP | 37 |
| 2 | DPPA3         | uc001wtp.3 | Missense_Mutation | SNP | 37 |
| 2 | CAMSAP1       | uc004cgr.4 | Silent            | SNP | 37 |
| 2 | KIAA1109      | uc003ieh.3 | Missense_Mutation | SNP | 37 |
| 2 | TRPM6         | uc004ajl.1 | 3'UTR             | SNP | 37 |
| 2 | USP29         | uc002qny.3 | Missense_Mutation | SNP | 37 |
| 2 | CNGA3         | uc010fij.3 | 3'UTR             | SNP | 37 |
| 2 | ARID1A        | uc001bmv.1 | Silent            | SNP | 37 |
| 2 | SGK223        | uc003wsh.4 | Missense_Mutation | SNP | 37 |
| 2 | GBF1          | uc001kux.2 | Silent            | SNP | 37 |
| 2 | TCEB3C        | uc021ujl.1 | Silent            | SNP | 37 |
| 2 | BAD           | uc001nzd.3 | 3'UTR             | SNP | 37 |
| 2 | C1orf173      | uc001dgg.3 | Missense_Mutation | SNP | 37 |
| 2 | TRIOBP        | uc003atr.3 | Missense_Mutation | SNP | 37 |
| 2 | SRRM2         | uc002crk.3 | Silent            | SNP | 37 |
| 2 | CALCR         | uc003umv.2 | 3'UTR             | SNP | 37 |
| 2 | RPS3          | uc001owh.3 | Missense_Mutation | SNP | 37 |
| 2 | TTN           | uc021vsy.1 | Missense_Mutation | SNP | 37 |
| 2 | NDUFA6        | uc003bcb.3 | 5'UTR             | SNP | 37 |
| 2 | LRRIQ3        | uc001dfy.4 | Missense_Mutation | SNP | 37 |
| 2 | DPPA3         | uc001wtp.3 | Missense_Mutation | SNP | 37 |
| 2 | SLC38A5       | uc010nid.3 | Missense_Mutation | SNP | 37 |
| 2 | HTR3E         | uc010hxr.3 | Splice_Site       | SNP | 37 |
| 2 | UNC13C        | uc021sms.1 | Missense_Mutation | SNP | 37 |
| 2 | CFTR          | uc003vjd.3 | Silent            | SNP | 37 |
| 2 | DKFZp547J0510 | uc021ppl.1 | 3'UTR             | SNP | 37 |
| 2 | GRIN2B        | uc001rbt.2 | Missense_Mutation | SNP | 37 |
| 2 | CSAG1         | uc004fge.3 | 3'UTR             | SNP | 37 |
| 2 | SLC44A2       | uc002mpf.3 | Missense_Mutation | SNP | 37 |
| 2 | DCC           | uc002lfe.2 | Missense_Mutation | SNP | 37 |
| 2 | CARD11        | uc003smv.3 | Missense_Mutation | SNP | 37 |
| 2 | DPF2          | uc001odm.3 | Missense_Mutation | SNP | 37 |
| 2 | ATP9B         | uc002lmx.3 | Missense_Mutation | SNP | 37 |
| 2 | GOLT1B        | uc001rez.2 | Silent            | SNP | 37 |
| 2 | GPR161        | uc010pln.2 | Silent            | SNP | 37 |
| 2 | RNF126        | uc010drs.3 | Silent            | SNP | 37 |
| 2 | MCTP2         | uc002btj.3 | Silent            | SNP | 37 |
| 2 | ITGA7         | uc001shh.3 | Silent            | SNP | 37 |
| 2 | B3GNT4        | uc001ubx.3 | Silent            | SNP | 37 |

|   |          |            |                   |     |    |
|---|----------|------------|-------------------|-----|----|
| 2 | C19orf21 | uc002lpo.3 | Silent            | SNP | 37 |
| 2 | SLC9A4   | uc002tbz.4 | Silent            | SNP | 37 |
| 2 | HCN1     | uc003jok.3 | Missense_Mutation | SNP | 37 |
| 2 | CPN1     | uc001kql.2 | Missense_Mutation | SNP | 37 |
| 2 | TUBB4A   | uc002mfg.1 | Silent            | SNP | 37 |
| 2 | KIAA0664 | uc002fuy.1 | Missense_Mutation | SNP | 37 |
| 2 | KALRN    | uc003ehg.3 | Silent            | SNP | 37 |
| 2 | LTBP2    | uc001xqa.3 | Missense_Mutation | SNP | 37 |
| 2 | PGLYRP3  | uc001fbn.1 | Missense_Mutation | SNP | 37 |
| 2 | CSMD1    | uc022aqr.1 | Missense_Mutation | SNP | 37 |
| 2 | OR4K14   | uc010tky.2 | Missense_Mutation | SNP | 37 |
| 2 | CD300E   | uc002jlb.2 | Missense_Mutation | SNP | 37 |
| 2 | KEL      | uc003wcb.3 | Missense_Mutation | SNP | 37 |
| 2 | VN1R1    | uc002qos.2 | Nonsense_Mutation | SNP | 37 |
| 2 | NRXN3    | uc001xun.3 | Missense_Mutation | SNP | 37 |
| 2 | OR51B6   | uc010qzb.2 | Silent            | SNP | 37 |
| 2 | ACOX1    | uc002jqe.3 | Silent            | SNP | 37 |
| 2 | DAAM2    | uc003oow.3 | Missense_Mutation | SNP | 37 |
| 2 | PCDHGC5  | uc003lkc.2 | Missense_Mutation | SNP | 37 |
| 2 | NOTCH3   | uc002nan.3 | Nonsense_Mutation | SNP | 37 |
| 2 | POTEM    | uc001vwc.3 | Missense_Mutation | SNP | 37 |
| 2 | WDR62    | uc002odd.2 | Silent            | SNP | 37 |
| 2 | LIPE     | uc002otr.3 | Missense_Mutation | SNP | 37 |
| 2 | LRP1B    | uc002tvj.1 | Missense_Mutation | SNP | 37 |
| 2 | COL6A3   | uc002vwl.2 | Missense_Mutation | SNP | 37 |
| 2 | RAG2     | uc021qgc.1 | Missense_Mutation | SNP | 37 |
| 2 | TBX15    | uc001ehl.1 | 5'UTR             | SNP | 37 |
| 2 | IGHE     | uc001yrw.1 | Intron            | SNP | 37 |
| 2 | CNR1     | uc010kbz.3 | Missense_Mutation | SNP | 37 |
| 2 | ASTL     | uc010yui.2 | Missense_Mutation | SNP | 37 |
| 2 | abParts  | uc021ser.1 | Intron            | SNP | 37 |
| 2 | GRB7     | uc021twu.1 | Silent            | SNP | 37 |
| 2 | KRT6A    | uc001sam.3 | Missense_Mutation | SNP | 37 |
| 2 | FAM179A  | uc010ezl.3 | Missense_Mutation | SNP | 37 |
| 2 | ILDR1    | uc003ees.3 | Silent            | SNP | 37 |
| 2 | C9orf71  | uc004agt.3 | Missense_Mutation | SNP | 37 |
| 2 | ADARB2   | uc009xhq.3 | 5'UTR             | SNP | 37 |
| 2 | MORC1    | uc003dxl.3 | Silent            | SNP | 37 |
| 2 | MYH2     | uc010coi.3 | Missense_Mutation | SNP | 37 |
| 2 | KLF8     | uc004dur.3 | Missense_Mutation | SNP | 37 |
| 2 | GUCY1A2  | uc009yxn.1 | Missense_Mutation | SNP | 37 |
| 2 | KPNA1    | uc003efe.2 | Missense_Mutation | SNP | 37 |
| 2 | CYP4Z1   | uc001cqu.1 | Missense_Mutation | SNP | 37 |

|   |           |            |                       |     |    |
|---|-----------|------------|-----------------------|-----|----|
| 2 | PCDH15    | uc021pqw.1 | Splice_Site           | SNP | 37 |
| 2 | PARP2     | uc001vxc.3 | Silent                | SNP | 37 |
| 2 | SLCO5A1   | uc003xyl.3 | Silent                | SNP | 37 |
| 2 | EMILIN3   | uc002xjy.1 | Silent                | SNP | 37 |
| 2 | ZNF488    | uc001jex.3 | Missense_Mutation     | SNP | 37 |
| 2 | FBLN2     | uc011ava.2 | Silent                | SNP | 37 |
| 2 | GPT2      | uc002eel.3 | 3'UTR                 | SNP | 37 |
| 2 | COL4A4    | uc021vxr.1 | Missense_Mutation     | SNP | 37 |
| 2 | TFSM      | uc001sqh.3 | Missense_Mutation     | SNP | 37 |
| 2 | CASK      | uc004dfl.4 | Silent                | SNP | 37 |
| 2 | BCKDHB    | uc003pjd.2 | Missense_Mutation     | SNP | 37 |
| 2 | OR10A3    | uc010rbi.2 | Missense_Mutation     | SNP | 37 |
| 2 | ZNF354A   | uc003mjj.3 | Missense_Mutation     | SNP | 37 |
| 2 | TP53I11   | uc001myi.3 | Missense_Mutation     | SNP | 37 |
| 2 | SCN4A     | uc002jds.1 | Nonsense_Mutation     | SNP | 37 |
| 2 | AK7       | uc001yfn.2 | Silent                | SNP | 37 |
| 2 | TMIGD2    | uc021umz.1 | Missense_Mutation     | SNP | 37 |
| 2 | ZNF714    | uc002npo.4 | Missense_Mutation     | SNP | 37 |
| 2 | PRKACG    | uc004agy.3 | 3'UTR                 | SNP | 37 |
| 2 | FAM169B   | uc002buk.1 | Missense_Mutation     | SNP | 37 |
| 2 | PWP2      | uc002zeb.3 | Missense_Mutation     | SNP | 37 |
| 2 | SYCP1     | uc001efr.3 | 3'UTR                 | SNP | 37 |
| 2 | CIAO1     | uc002svs.3 | Missense_Mutation     | SNP | 37 |
| 2 | ASAP1     | uc003yta.2 | Silent                | SNP | 37 |
| 2 | RIMS2     | uc003ylp.3 | Intron                | SNP | 37 |
| 2 | C8B       | uc001cyp.3 | Missense_Mutation     | SNP | 37 |
| 2 | LOC643201 | uc003mdn.3 | Non-coding_Transcript | SNP | 37 |
| 2 | POTEA     | uc003xpz.1 | Missense_Mutation     | SNP | 37 |
| 2 | CNOT2     | uc001svv.3 | Silent                | SNP | 37 |
| 2 | SYNDIG1   | uc002wtw.1 | Missense_Mutation     | SNP | 37 |
| 2 | HSP90AA1  | uc001ykv.4 | Silent                | SNP | 37 |
| 2 | SYNJ2     | uc003qqx.2 | Silent                | SNP | 37 |
| 2 | MOSPD1    | uc004eyb.3 | Missense_Mutation     | SNP | 37 |
| 2 | HIVEP3    | uc001cgz.4 | Silent                | SNP | 37 |
| 2 | MAT1A     | uc001kbw.3 | Silent                | SNP | 37 |
| 2 | A1CF      | uc010qho.2 | Missense_Mutation     | SNP | 37 |
| 2 | MDGA1     | uc003onu.1 | Missense_Mutation     | SNP | 37 |
| 2 | CLSTN2    | uc003etn.3 | Missense_Mutation     | SNP | 37 |
| 2 | ZNF483    | uc004bff.2 | Silent                | SNP | 37 |
| 2 | OR5B2     | uc010rkg.2 | Silent                | SNP | 37 |
| 2 | COL9A1    | uc003pfg.4 | Silent                | SNP | 37 |
| 2 | KDELR1    | uc002pja.1 | 5'UTR                 | SNP | 37 |
| 2 | FLII      | uc002gsr.1 | Silent                | SNP | 37 |



|   |          |            |                   |     |    |
|---|----------|------------|-------------------|-----|----|
| 2 | ZFP1     | uc002fdo.3 | Silent            | SNP | 37 |
| 2 | PCLO     | uc003uhx.2 | Missense_Mutation | SNP | 37 |
| 2 | MAGEA1   | uc004fhf.2 | Silent            | SNP | 37 |
| 2 | MAP4K2   | uc010rnp.1 | 3'UTR             | SNP | 37 |
| 2 | CATSPERG | uc002oih.4 | Missense_Mutation | SNP | 37 |
| 2 | KIAA1210 | uc004era.4 | Silent            | SNP | 37 |
| 2 | CATSPER1 | uc001ogt.3 | Missense_Mutation | SNP | 37 |
| 2 | JAK1     | uc001dbu.1 | Missense_Mutation | SNP | 37 |
| 2 | POLR3D   | uc003xbl.3 | Missense_Mutation | SNP | 37 |
| 2 | TIGD3    | uc001odo.4 | Missense_Mutation | SNP | 37 |
| 2 | GHR      | uc021xxv.1 | Missense_Mutation | SNP | 37 |
| 2 | GPR98    | uc003kju.3 | Silent            | SNP | 37 |
| 2 | KCNH8    | uc003cbk.1 | Missense_Mutation | SNP | 37 |
| 2 | ANKZF1   | uc002vjk.1 | Missense_Mutation | SNP | 37 |
| 2 | C19orf55 | uc021usz.1 | Missense_Mutation | SNP | 37 |
| 2 | FKBP4    | uc001qkz.3 | 5'UTR             | SNP | 37 |
| 2 | SLC5A5   | uc002nhr.4 | Missense_Mutation | SNP | 37 |
| 2 | NCCRP1   | uc002okq.1 | Silent            | SNP | 37 |
| 2 | PTPRJ    | uc001ngp.4 | Silent            | SNP | 37 |
| 2 | COL6A2   | uc002zia.1 | Missense_Mutation | SNP | 37 |
| 2 | CACNA1B  | uc004cog.3 | Splice_Site       | SNP | 37 |
| 2 | WDR7     | uc002ljk.1 | Silent            | SNP | 37 |
| 2 | CCDC39   | uc010hxe.3 | Missense_Mutation | SNP | 37 |
| 2 | A2ML1    | uc001quz.4 | Silent            | SNP | 37 |
| 2 | INSRR    | uc010pht.2 | Missense_Mutation | SNP | 37 |
| 2 | RGS18    | uc001gsg.3 | Missense_Mutation | SNP | 37 |
| 2 | OR1L1    | uc022bmz.1 | Nonsense_Mutation | SNP | 37 |
| 2 | SYCP1    | uc001efr.3 | Missense_Mutation | SNP | 37 |
| 2 | RBP2     | uc003eth.3 | Silent            | SNP | 37 |
| 2 | Unknown  |            | IGR               | SNP | 37 |
| 2 | SLC9C1   | uc003dyu.3 | Missense_Mutation | SNP | 37 |
| 2 | MAPKAP1  | uc004bvp.3 | Silent            | SNP | 37 |
| 2 | TDP1     | uc001xxy.3 | Missense_Mutation | SNP | 37 |
| 2 | LRP1     | uc001snd.3 | Silent            | SNP | 37 |
| 2 | FAM19A4  | uc021xag.1 | Missense_Mutation | SNP | 37 |
| 2 | KIAA0895 | uc003tfd.2 | 3'UTR             | SNP | 37 |
| 2 | VEPH1    | uc003fbj.2 | Missense_Mutation | SNP | 37 |
| 2 | CNKSR3   | uc021zhc.1 | Missense_Mutation | SNP | 37 |
| 2 | FASTKD5  | uc002whz.3 | Missense_Mutation | SNP | 37 |
| 2 | MLLT6    | uc002hqi.4 | Silent            | SNP | 37 |
| 2 | STK31    | uc003sws.4 | Missense_Mutation | SNP | 37 |
| 2 | ADCY1    | uc003tne.4 | Missense_Mutation | SNP | 37 |
| 2 | MUC16    | uc002mkp.3 | Missense_Mutation | SNP | 37 |

|   |          |            |                   |     |    |
|---|----------|------------|-------------------|-----|----|
| 2 | CYP2A7   | uc002opo.3 | Silent            | SNP | 37 |
| 2 | TBC1D12  | uc001kjr.2 | Silent            | SNP | 37 |
| 2 | ASIC2    | uc002hht.3 | Splice_Site       | SNP | 37 |
| 2 | ATP13A1  | uc002nnh.4 | Missense_Mutation | SNP | 37 |
| 2 | IPO7     | uc001mho.3 | Silent            | SNP | 37 |
| 2 | PFKFB1   | uc004dty.1 | Silent            | SNP | 37 |
| 2 | RABL3    | uc003edx.3 | 3'UTR             | SNP | 37 |
| 2 | GOLGA6C  | uc002azs.2 | Silent            | SNP | 37 |
| 2 | TBX15    | uc001ehl.1 | Missense_Mutation | SNP | 37 |
| 2 | ERGIC1   | uc003mbz.4 | Silent            | SNP | 37 |
| 2 | KEL      | uc003wcb.3 | Silent            | SNP | 37 |
| 2 | ZNF676   | uc002nqs.1 | Silent            | SNP | 37 |
| 2 | SLC16A14 | uc002vqd.2 | Missense_Mutation | SNP | 37 |
| 2 | HECW1    | uc003tid.1 | Missense_Mutation | SNP | 37 |
| 2 | TGFBR1   | uc004aze.3 | 3'UTR             | SNP | 37 |
| 2 | SLC12A1  | uc001zwn.4 | Missense_Mutation | SNP | 37 |
| 2 | TMPRSS15 | uc002ykw.3 | Missense_Mutation | SNP | 37 |
| 2 | RELN     | uc022ajr.1 | Missense_Mutation | SNP | 37 |
| 2 | COL17A1  | uc001kxr.3 | Missense_Mutation | SNP | 37 |
| 2 | TP53     | uc002gim.2 | Missense_Mutation | SNP | 37 |
| 2 | GFPT1    | uc002sfi.2 | 3'UTR             | SNP | 37 |
| 2 | MPL      | uc001ciw.3 | 5'UTR             | SNP | 37 |
| 2 | SHC3     | uc004aqf.2 | Silent            | SNP | 37 |
| 2 | ECI1     | uc002cpr.3 | Missense_Mutation | SNP | 37 |
| 2 | TDG      | uc001tkg.3 | Missense_Mutation | SNP | 37 |
| 2 | C6       | uc003jmk.2 | Silent            | SNP | 37 |
| 2 | SZT2     | uc001cjk.2 | Silent            | SNP | 37 |
| 2 | RRN3P1   | uc010vbl.1 | 5'UTR             | SNP | 37 |
| 2 | LDHAL6B  | uc002agb.3 | Silent            | SNP | 37 |
| 2 | PCDH15   | uc010qhy.1 | Missense_Mutation | SNP | 37 |
| 2 | ZFPM2    | uc003ymd.3 | Silent            | SNP | 37 |
| 2 | PCLO     | uc003uhx.2 | Missense_Mutation | SNP | 37 |
| 2 | CPM      | uc001sur.3 | Silent            | SNP | 37 |
| 2 | NSUN7    | uc003gvj.4 | Missense_Mutation | SNP | 37 |
| 2 | TG       | uc003ytw.3 | Nonsense_Mutation | SNP | 37 |
| 2 | ZNF629   | uc002dzs.1 | Silent            | SNP | 37 |
| 2 | COL4A6   | uc004enw.4 | Silent            | SNP | 37 |
| 2 | SYTL4    | uc004egd.4 | Missense_Mutation | SNP | 37 |
| 2 | FRK      | uc003pwi.1 | Missense_Mutation | SNP | 37 |
| 2 | RGL3     | uc002mro.2 | Missense_Mutation | SNP | 37 |
| 2 | CHST6    | uc002fef.3 | Missense_Mutation | SNP | 37 |
| 2 | RUNX1T1  | uc022axs.1 | Missense_Mutation | SNP | 37 |
| 2 | AKT2     | uc002onf.3 | 3'UTR             | SNP | 37 |

|   |          |            |                   |     |    |
|---|----------|------------|-------------------|-----|----|
| 2 | ASZ1     | uc003vjb.2 | 3'UTR             | SNP | 37 |
| 2 | ADAMTS9  | uc003dmg.3 | Missense_Mutation | SNP | 37 |
| 2 | ACTC1    | uc001ziu.1 | Silent            | SNP | 37 |
| 2 | KIAA1217 | uc001iru.4 | Missense_Mutation | SNP | 37 |
| 2 | TCRA     | uc001wdd.2 | Silent            | SNP | 37 |
| 2 | COQ5     | uc001tyn.3 | Missense_Mutation | SNP | 37 |
| 2 | LPPR4    | uc001dse.3 | Missense_Mutation | SNP | 37 |
| 2 | PLXNB1   | uc003csw.2 | Silent            | SNP | 37 |
| 2 | PCDHB3   | uc003lio.3 | Missense_Mutation | SNP | 37 |
| 2 | POM121   | uc010lam.1 | 3'UTR             | SNP | 37 |
| 2 | ACSBG1   | uc002bdh.3 | Silent            | SNP | 37 |
| 2 | PARP2    | uc001vxc.3 | Missense_Mutation | SNP | 37 |
| 2 | NAV3     | uc001syp.3 | Silent            | SNP | 37 |
| 2 | FAHD2A   | uc002sur.3 | 3'UTR             | SNP | 37 |
| 2 | POTEG    | uc001vuz.1 | Nonsense_Mutation | SNP | 37 |
| 2 | SEMA6B   | uc010dud.2 | Missense_Mutation | SNP | 37 |
| 2 | PPP2R1B  | uc001plw.1 | Missense_Mutation | SNP | 37 |
| 2 | PARP4    | uc001upl.3 | Missense_Mutation | SNP | 37 |
| 2 | IFT52    | uc002xkw.3 | Missense_Mutation | SNP | 37 |
| 2 | PCDHAC2  | uc003lia.2 | Silent            | SNP | 37 |
| 2 | MYO3A    | uc001isn.2 | Missense_Mutation | SNP | 37 |
| 2 | BRD1     | uc003biu.4 | Missense_Mutation | SNP | 37 |
| 2 | HECW2    | uc002utm.1 | Missense_Mutation | SNP | 37 |
| 2 | PKD1L2   | uc002fgh.1 | 3'UTR             | SNP | 37 |
| 2 | LEPREL1  | uc011bsk.2 | Missense_Mutation | SNP | 37 |
| 2 | PTN      | uc003vtq.2 | Missense_Mutation | SNP | 37 |
| 2 | SATB2    | uc002uuy.2 | Missense_Mutation | SNP | 37 |
| 2 | PRRG1    | uc022but.1 | 3'UTR             | SNP | 37 |
| 2 | TBXAS1   | uc011kqv.2 | Missense_Mutation | SNP | 37 |
| 2 | NLRP11   | uc010ygf.2 | Missense_Mutation | SNP | 37 |
| 2 | ELP4     | uc001mtc.3 | Missense_Mutation | SNP | 37 |
| 2 | KIF19    | uc002jkm.4 | Silent            | SNP | 37 |
| 2 | HEATR1   | uc001hyd.2 | Missense_Mutation | SNP | 37 |
| 2 | TRAPPC1  | uc002gjo.2 | Intron            | SNP | 37 |
| 2 | STAG1    | uc003era.1 | Silent            | SNP | 37 |
| 2 | CSAD     | uc010snx.2 | 3'UTR             | SNP | 37 |
| 2 | MTRF1L   | uc003qpi.4 | 3'UTR             | SNP | 37 |
| 2 | C22orf31 | uc003aej.1 | Missense_Mutation | SNP | 37 |
| 2 | PI4K2A   | uc001knx.2 | 3'UTR             | SNP | 37 |
| 2 | LGR6     | uc001gxu.3 | Missense_Mutation | SNP | 37 |
| 2 | SPEF2    | uc003jjo.3 | Silent            | SNP | 37 |
| 2 | TMEM59L  | uc002njy.4 | 3'UTR             | SNP | 37 |
| 2 | KPNA1    | uc003efe.2 | Silent            | SNP | 37 |

|   |            |            |                   |     |    |
|---|------------|------------|-------------------|-----|----|
| 2 | C12orf59   | uc001qxr.3 | Silent            | SNP | 37 |
| 2 | XKR9       | uc003xyq.3 | Silent            | SNP | 37 |
| 2 | ZMIZ1      | uc001kaf.2 | Missense_Mutation | SNP | 37 |
| 2 | TNFRSF8    | uc001atq.3 | Missense_Mutation | SNP | 37 |
| 2 | CNNM2      | uc001kwm.3 | 3'UTR             | SNP | 37 |
| 2 | MCTP1      | uc003kkx.2 | Missense_Mutation | SNP | 37 |
| 2 | ATP1A2     | uc001fvc.3 | Missense_Mutation | SNP | 37 |
| 2 | ITGAM      | uc002ebr.3 | Missense_Mutation | SNP | 37 |
| 2 | BSND       | uc001cye.3 | Missense_Mutation | SNP | 37 |
| 2 | C7orf63    | uc010lep.3 | Missense_Mutation | SNP | 37 |
| 2 | ZNF793     | uc010efm.3 | Silent            | SNP | 37 |
| 2 | CFH        | uc001gtj.4 | Missense_Mutation | SNP | 37 |
| 2 | ZNF440     | uc002msp.1 | 3'UTR             | SNP | 37 |
| 2 | KIF15      | uc003cnx.4 | Missense_Mutation | SNP | 37 |
| 2 | OR4D1      | uc010wno.2 | Silent            | SNP | 37 |
| 2 | AADA3L3    | uc009vnn.1 | Silent            | SNP | 37 |
| 2 | EDNRA      | uc003iky.3 | Missense_Mutation | SNP | 37 |
| 2 | NMI        | uc002txi.2 | Silent            | SNP | 37 |
| 2 | TBX21      | uc002ilv.1 | Missense_Mutation | SNP | 37 |
| 2 | ZNF408     | uc001nde.2 | Missense_Mutation | SNP | 37 |
| 2 | FLII       | uc002gsr.1 | Nonsense_Mutation | SNP | 37 |
| 2 | PCDH1      | uc003llp.3 | Missense_Mutation | SNP | 37 |
| 2 | DAB1       | uc001cys.1 | Intron            | SNP | 37 |
| 2 | MORN3      | uc001uax.3 | Nonsense_Mutation | SNP | 37 |
| 2 | SSPO       | uc010lpk.3 | Missense_Mutation | SNP | 37 |
| 2 | PIP        | uc003wcf.1 | Missense_Mutation | SNP | 37 |
| 2 | SEC11C     | uc010dpo.1 | 3'UTR             | SNP | 37 |
| 2 | NOLC1      | uc001kup.2 | 5'UTR             | SNP | 37 |
| 2 | CCP110     | uc002dgl.4 | Missense_Mutation | SNP | 37 |
| 2 | USHBP1     | uc002nfs.1 | Missense_Mutation | SNP | 37 |
| 2 | MYH1       | uc002gmo.3 | Silent            | SNP | 37 |
| 2 | LRP10      | uc001whd.3 | Missense_Mutation | SNP | 37 |
| 2 | NAB2       | uc001smz.3 | Missense_Mutation | SNP | 37 |
| 2 | F13B       | uc001gtt.1 | Missense_Mutation | SNP | 37 |
| 2 | CLK3       | uc010uln.2 | Missense_Mutation | SNP | 37 |
| 2 | LY75-CD302 | uc010fot.2 | 3'UTR             | SNP | 37 |
| 2 | ARHGAP10   | uc003ilf.3 | Silent            | SNP | 37 |
| 2 | FBXL7      | uc003jfn.1 | Silent            | SNP | 37 |
| 2 | PKD2L1     | uc001kqx.1 | Missense_Mutation | SNP | 37 |
| 2 | MAST4      | uc021xzk.1 | Missense_Mutation | SNP | 37 |
| 2 | SDPR       | uc002utb.3 | Silent            | SNP | 37 |
| 2 | SLC52A1    | uc002gap.4 | Missense_Mutation | SNP | 37 |
| 2 | OR2W3      | uc001idp.1 | Silent            | SNP | 37 |

|   |          |            |                       |     |    |
|---|----------|------------|-----------------------|-----|----|
| 2 | ZZEF1    | uc002fxe.3 | Silent                | SNP | 37 |
| 2 | CDC123   | uc001ill.3 | 5'UTR                 | SNP | 37 |
| 2 | PRR23A   | uc011bms.2 | Silent                | SNP | 37 |
| 2 | MYO7A    | uc001oyb.2 | Silent                | SNP | 37 |
| 2 | ADORA2B  | uc002gpd.1 | Silent                | SNP | 37 |
| 2 | abParts  | uc021ser.1 | Non-coding_Transcript | SNP | 37 |
| 2 | LMOD2    | uc003vky.2 | Missense_Mutation     | SNP | 37 |
| 2 | C17orf90 | uc002kbb.3 | 3'UTR                 | SNP | 37 |
| 2 | TAB2     | uc003qmj.3 | Missense_Mutation     | SNP | 37 |
| 2 | DIS3L    | uc010ujm.2 | Missense_Mutation     | SNP | 37 |
| 2 | LPHN1    | uc010xnn.2 | 5'UTR                 | SNP | 37 |
| 2 | GRM6     | uc003mjr.3 | Missense_Mutation     | SNP | 37 |
| 2 | VEPH1    | uc003fbj.2 | Silent                | SNP | 37 |
| 2 | EFCAB3   | uc010wpc.2 | Missense_Mutation     | SNP | 37 |
| 2 | MGAM     | uc003vwy.3 | Silent                | SNP | 37 |
| 2 | BZW2     | uc003stj.2 | Splice_Site           | SNP | 37 |
| 2 | TRIB3    | uc002wdn.3 | Missense_Mutation     | SNP | 37 |
| 2 | KIF19    | uc002jkm.4 | Missense_Mutation     | SNP | 37 |
| 2 | KIF4A    | uc004dyg.3 | Missense_Mutation     | SNP | 37 |
| 2 | CYP2E1   | uc001lnj.1 | Silent                | SNP | 37 |
| 2 | FTSJD2   | uc003ons.3 | Silent                | SNP | 37 |
| 2 | CACNB1   | uc002hrm.2 | Missense_Mutation     | SNP | 37 |
| 2 | THSD7B   | uc002tva.1 | Missense_Mutation     | SNP | 37 |
| 2 | FBXO39   | uc010vtg.2 | 3'UTR                 | SNP | 37 |
| 2 | OR6B1    | uc003wdt.1 | Silent                | SNP | 37 |
| 2 | HAUS4    | uc001whw.3 | Missense_Mutation     | SNP | 37 |
| 2 | FUT11    | uc001juy.1 | 3'UTR                 | SNP | 37 |
| 2 | CARS     | uc001lxf.3 | Silent                | SNP | 37 |
| 2 | FAM13C   | uc010qif.1 | Missense_Mutation     | SNP | 37 |
| 2 | ZNF496   | uc009xgv.3 | Silent                | SNP | 37 |
| 2 | CFHR2    | uc001gtq.1 | Missense_Mutation     | SNP | 37 |
| 2 | MMD2     | uc003sno.4 | Missense_Mutation     | SNP | 37 |
| 2 | CNGB1    | uc002emt.2 | 3'UTR                 | SNP | 37 |
| 2 | SLC25A39 | uc010wix.1 | 3'UTR                 | SNP | 37 |
| 2 | SF1      | uc001oaz.2 | Missense_Mutation     | SNP | 37 |
| 2 | DNAJC8   | uc001bpn.3 | 5'UTR                 | SNP | 37 |
| 2 | NLRP14   | uc001mfb.1 | Missense_Mutation     | SNP | 37 |
| 2 | CPN2     | uc003fts.3 | Missense_Mutation     | SNP | 37 |
| 2 | DCLRE1A  | uc001law.2 | Missense_Mutation     | SNP | 37 |
| 2 | AFF3     | uc002taf.3 | Silent                | SNP | 37 |
| 2 | ALG6     | uc021oof.1 | Silent                | SNP | 37 |
| 2 | CHRNA3   | uc002bec.3 | Silent                | SNP | 37 |
| 2 | CD86     | uc003eet.3 | Silent                | SNP | 37 |

|   |                |            |                   |     |    |
|---|----------------|------------|-------------------|-----|----|
| 2 | SDHAP1         | uc011btq.1 | 5'UTR             | SNP | 37 |
| 2 | RUNX1T1        | uc003yfg.2 | 3'UTR             | SNP | 37 |
| 2 | TTC39A         | uc001csl.3 | Missense_Mutation | SNP | 37 |
| 2 | SPATA6L        | uc011llz.2 | Missense_Mutation | SNP | 37 |
| 2 | ZWILCH         | uc002aqb.3 | 3'UTR             | SNP | 37 |
| 2 | SLC16A4        | uc001dzo.2 | 3'UTR             | SNP | 37 |
| 2 | SCN1A          | uc002udo.4 | Nonsense_Mutation | SNP | 37 |
| 2 | CBLN4          | uc002xxa.3 | 3'UTR             | SNP | 37 |
| 2 | CCDC74A        | uc002tta.3 | Silent            | SNP | 37 |
| 2 | HNRNPUL1       | uc002oqf.4 | Missense_Mutation | SNP | 37 |
| 2 | THOC2          | uc004etu.3 | Intron            | SNP | 37 |
| 2 | RP1            | uc003xsd.1 | Silent            | SNP | 37 |
| 2 | PISD           | uc003alm.4 | 3'UTR             | SNP | 37 |
| 2 | ANKRD11        | uc002fmx.1 | Missense_Mutation | SNP | 37 |
| 2 | ZNF408         | uc001nde.2 | Silent            | SNP | 37 |
| 2 | FCER1A         | uc001ftq.3 | Silent            | SNP | 37 |
| 2 | TTN            | uc021vsy.1 | Missense_Mutation | SNP | 37 |
| 2 | KIAA0317       | uc001xqb.3 | Missense_Mutation | SNP | 37 |
| 2 | SLC9C1         | uc003dyu.3 | Missense_Mutation | SNP | 37 |
| 2 | ARMCX5-GPRASP2 | uc022cay.1 | Missense_Mutation | SNP | 37 |
| 2 | TDRD9          | uc001yom.4 | Missense_Mutation | SNP | 37 |
| 2 | KLF2           | uc002ndw.3 | 5'UTR             | SNP | 37 |
| 2 | CSRNP3         | uc002udf.3 | 3'UTR             | SNP | 37 |
| 2 | FAM5B          | uc001glf.3 | Missense_Mutation | SNP | 37 |
| 2 | TRIM40         | uc003npk.2 | Missense_Mutation | SNP | 37 |
| 2 | TRAM1          | uc003xyo.2 | Missense_Mutation | SNP | 37 |
| 2 | KCNMA1         | uc001jxn.3 | Silent            | SNP | 37 |
| 2 | OR4A47         | uc010rhx.2 | Missense_Mutation | SNP | 37 |
| 2 | VPS35          | uc002eef.4 | Missense_Mutation | SNP | 37 |
| 2 | GIMAP7         | uc003whk.3 | Missense_Mutation | SNP | 37 |
| 2 | CORIN          | uc003gxm.3 | Missense_Mutation | SNP | 37 |
| 2 | POU6F2         | uc003thb.2 | Missense_Mutation | SNP | 37 |
| 2 | GXYLT1         | uc001rms.4 | Missense_Mutation | SNP | 37 |
| 2 | NDE1           | uc010uzy.2 | 3'UTR             | SNP | 37 |
| 2 | TMEM130        | uc003upo.3 | Silent            | SNP | 37 |
| 2 | ACTRT1         | uc004eum.3 | 5'UTR             | SNP | 37 |
| 2 | PLCH1          | uc021xge.1 | Silent            | SNP | 37 |
| 2 | FKBP6          | uc003twz.2 | Intron            | SNP | 37 |
| 2 | FABP7          | uc003pzd.3 | Silent            | SNP | 37 |
| 2 | ABCA13         | uc003toq.2 | Missense_Mutation | SNP | 37 |
| 2 | FKBP9          | uc011kal.2 | Silent            | SNP | 37 |
| 2 | DGKB           | uc003sta.3 | 3'UTR             | SNP | 37 |
| 2 | SNRNP48        | uc003mxr.3 | Silent            | SNP | 37 |

|   |           |            |                       |     |    |
|---|-----------|------------|-----------------------|-----|----|
| 2 | RBBP7     | uc004cxs.2 | Splice_Site           | SNP | 37 |
| 2 | PKHD1L1   | uc003yne.3 | Missense_Mutation     | SNP | 37 |
| 2 | RMND5A    | uc002srr.2 | Missense_Mutation     | SNP | 37 |
| 2 | GALNT8    | uc001qne.1 | Missense_Mutation     | SNP | 37 |
| 2 | EZH2      | uc003wfb.2 | Missense_Mutation     | SNP | 37 |
| 2 | OR4K1     | uc001vwj.2 | Missense_Mutation     | SNP | 37 |
| 2 | GTF3C2    | uc002rju.1 | Silent                | SNP | 37 |
| 2 | PTPRF     | uc001cjr.3 | Missense_Mutation     | SNP | 37 |
| 2 | ACER3     | uc009yum.1 | Missense_Mutation     | SNP | 37 |
| 2 | ZNF550    | uc002qpe.1 | Intron                | SNP | 37 |
| 2 | TOX2      | uc010ggo.3 | Missense_Mutation     | SNP | 37 |
| 2 | COL5A1    | uc004cfe.3 | Missense_Mutation     | SNP | 37 |
| 2 | KLF3      | uc003gth.4 | 3'UTR                 | SNP | 37 |
| 2 | SEZ6L2    | uc010vec.2 | Silent                | SNP | 37 |
| 2 | FBXL7     | uc003jfn.1 | Missense_Mutation     | SNP | 37 |
| 2 | Unknown   |            | IGR                   | SNP | 37 |
| 2 | SIPA1L2   | uc001hvg.3 | Silent                | SNP | 37 |
| 2 | SCN7A     | uc002udu.2 | Missense_Mutation     | SNP | 37 |
| 2 | HOXA1     | uc003sye.3 | Silent                | SNP | 37 |
| 2 | CCT4      | uc002sbo.3 | Nonsense_Mutation     | SNP | 37 |
| 2 | QSOX1     | uc001gnz.3 | Missense_Mutation     | SNP | 37 |
| 2 | RUNX1T1   | uc003yfb.2 | 5'UTR                 | SNP | 37 |
| 2 | HGF       | uc003uhl.3 | Missense_Mutation     | SNP | 37 |
| 2 | CPM       | uc001sur.3 | Missense_Mutation     | SNP | 37 |
| 2 | MGA       | uc010ucy.2 | 5'UTR                 | SNP | 37 |
| 2 | OR2L3     | uc001idx.1 | Missense_Mutation     | SNP | 37 |
| 2 | CACNA1G   | uc002irk.1 | Silent                | SNP | 37 |
| 2 | LRP6      | uc001rah.4 | Missense_Mutation     | SNP | 37 |
| 2 | KCNMB4    | uc001svx.3 | Missense_Mutation     | SNP | 37 |
| 2 | ADCY7     | uc002egd.1 | Missense_Mutation     | SNP | 37 |
| 2 | NTRK2     | uc004anz.1 | Missense_Mutation     | SNP | 37 |
| 2 | TRIM10    | uc003npo.3 | Missense_Mutation     | SNP | 37 |
| 2 | PDZD2     | uc003jhl.3 | Silent                | SNP | 37 |
| 2 | CDC37     | uc002mof.1 | 5'UTR                 | SNP | 37 |
| 2 | NOTCH4    | uc003obb.3 | Splice_Site           | SNP | 37 |
| 2 | LOC440041 | uc021qjb.1 | Non-coding_Transcript | SNP | 37 |
| 2 | OR2L8     | uc001idt.1 | Missense_Mutation     | SNP | 37 |
| 2 | SFTPA1    | uc009xry.3 | 3'UTR                 | SNP | 37 |
| 2 | CA10      | uc002itv.4 | 5'UTR                 | SNP | 37 |
| 2 | CCDC37    | uc010hsg.1 | Silent                | SNP | 37 |
| 2 | RYR3      | uc001zhi.3 | Silent                | SNP | 37 |
| 2 | SPHKAP    | uc002vpq.2 | Missense_Mutation     | SNP | 37 |
| 2 | ZC3H11A   | uc001hac.3 | Missense_Mutation     | SNP | 37 |

|   |            |            |                       |     |    |
|---|------------|------------|-----------------------|-----|----|
| 2 | PARP9      | uc010hri.3 | Missense_Mutation     | SNP | 37 |
| 2 | ZCCHC5     | uc004edc.1 | Silent                | SNP | 37 |
| 2 | MAN2C1     | uc002bah.3 | Missense_Mutation     | SNP | 37 |
| 2 | ANKFY1     | uc002fxn.3 | Silent                | SNP | 37 |
| 2 | PEX3       | uc003qjl.3 | Missense_Mutation     | SNP | 37 |
| 2 | PPARA      | uc003bgw.1 | Silent                | SNP | 37 |
| 2 | ANGEL1     | uc001xsv.3 | Silent                | SNP | 37 |
| 2 | SNCAIP     | uc003ksx.1 | Silent                | SNP | 37 |
| 2 | C3orf35    | uc003cha.4 | Nonsense_Mutation     | SNP | 37 |
| 2 | ALDH1L1    | uc003eim.1 | Missense_Mutation     | SNP | 37 |
| 2 | TPTE       | uc002yis.1 | Non-coding_Transcript | SNP | 37 |
| 2 | RBFOX1     | uc002cyy.2 | Silent                | SNP | 37 |
| 2 | TNRC6C     | uc002juf.2 | Missense_Mutation     | SNP | 37 |
| 2 | DMBT1      | uc001lgl.1 | Silent                | SNP | 37 |
| 2 | LRRTM3     | uc001jnz.1 | Missense_Mutation     | SNP | 37 |
| 2 | ATP13A1    | uc002nnh.4 | Silent                | SNP | 37 |
| 2 | NEU1       | uc003nxq.4 | Missense_Mutation     | SNP | 37 |
| 2 | AV1S4A1N1T | uc001wcc.3 | Silent                | SNP | 37 |
| 2 | ABTB1      | uc003ejt.3 | 3'UTR                 | SNP | 37 |
| 2 | DFNA5      | uc010kus.1 | Silent                | SNP | 37 |
| 2 | APOB       | uc002red.3 | Silent                | SNP | 37 |
| 2 | ME1        | uc003pjy.3 | Silent                | SNP | 37 |
| 2 | CATSPERG   | uc002oih.4 | Silent                | SNP | 37 |
| 2 | GRIN3A     | uc004bbp.2 | Silent                | SNP | 37 |
| 2 | PARD6A     | uc002ett.3 | Missense_Mutation     | SNP | 37 |
| 2 | UBL4B      | uc001dzc.3 | Missense_Mutation     | SNP | 37 |
| 2 | CMYA5      | uc003kgc.3 | Missense_Mutation     | SNP | 37 |
| 2 | ATL1       | uc021rsw.1 | Missense_Mutation     | SNP | 37 |
| 2 | LGALS12    | uc001nxc.2 | Missense_Mutation     | SNP | 37 |
| 2 | ZMYND8     | uc010zxy.1 | Silent                | SNP | 37 |
| 2 | ANKFN1     | uc002iun.1 | Silent                | SNP | 37 |
| 2 | WDR72      | uc002acj.2 | Missense_Mutation     | SNP | 37 |
| 2 | FAM75C2    | uc011lti.2 | Missense_Mutation     | SNP | 37 |
| 2 | RELN       | uc022ajr.1 | Missense_Mutation     | SNP | 37 |
| 2 | SEMA3E     | uc003uhy.2 | Missense_Mutation     | SNP | 37 |
| 2 | BEND2      | uc004cyj.4 | Silent                | SNP | 37 |
| 2 | RYR1       | uc002oit.3 | Missense_Mutation     | SNP | 37 |
| 2 | TRAPPC8    | uc002kxc.4 | Missense_Mutation     | SNP | 37 |
| 2 | EYS        | uc011dxu.1 | 5'UTR                 | SNP | 37 |
| 2 | L3MBTL4    | uc002kmz.4 | Missense_Mutation     | SNP | 37 |
| 2 | GLRA3      | uc003ity.1 | Silent                | SNP | 37 |
| 2 | KIF1C      | uc002gan.2 | 3'UTR                 | SNP | 37 |
| 2 | NOL11      | uc002jgd.1 | Missense_Mutation     | SNP | 37 |



|   |           |            |                   |     |    |
|---|-----------|------------|-------------------|-----|----|
| 2 | DOT1L     | uc002lvb.4 | Missense_Mutation | SNP | 37 |
| 2 | CAPZA3    | uc001rdy.3 | Silent            | SNP | 37 |
| 2 | MAP3K8    | uc001ivi.2 | Missense_Mutation | SNP | 37 |
| 2 | CSMD3     | uc003ynu.3 | Missense_Mutation | SNP | 37 |
| 2 | SEC31B    | uc001krc.1 | Silent            | SNP | 37 |
| 2 | IFT88     | uc001unh.3 | Missense_Mutation | SNP | 37 |
| 2 | OR10S1    | uc001pzm.1 | Silent            | SNP | 37 |
| 2 | CCDC135   | uc002emi.3 | Missense_Mutation | SNP | 37 |
| 2 | SGIP1     | uc001dcr.3 | Missense_Mutation | SNP | 37 |
| 2 | MMP8      | uc001phe.2 | 3'UTR             | SNP | 37 |
| 2 | PRUNE2    | uc010mpk.3 | Missense_Mutation | SNP | 37 |
| 2 | EPG5      | uc002lbn.3 | Missense_Mutation | SNP | 37 |
| 2 | TNFRSF10C | uc003xcy.3 | 3'UTR             | SNP | 37 |
| 2 | SLC24A4   | uc001yak.3 | Silent            | SNP | 37 |
| 2 | VPS26B    | uc001qhe.3 | Missense_Mutation | SNP | 37 |
| 2 | GATAD2A   | uc010xqv.2 | Intron            | SNP | 37 |
| 2 | SLC4A1    | uc002igf.4 | Missense_Mutation | SNP | 37 |
| 2 | LOC407835 | uc003voo.3 | Silent            | SNP | 37 |
| 2 | RFT1      | uc003dgi.3 | Missense_Mutation | SNP | 37 |
| 2 | LILRB4    | uc010ers.1 | 3'UTR             | SNP | 37 |
| 2 | SOX7      | uc011kwz.2 | Missense_Mutation | SNP | 37 |
| 2 | KLHL1     | uc001vip.3 | Silent            | SNP | 37 |
| 2 | AB231722  | uc001nnk.1 | Splice_Site       | SNP | 37 |
| 2 | BCLAF1    | uc003qgx.1 | Missense_Mutation | SNP | 37 |
| 2 | ATG9B     | uc011kvc.2 | Nonsense_Mutation | SNP | 37 |
| 2 | TP53TG5   | uc002xny.3 | Missense_Mutation | SNP | 37 |
| 2 | MCHR2     | uc003pqh.1 | Nonsense_Mutation | SNP | 37 |
| 2 | SCAND3    | uc003nlo.3 | Missense_Mutation | SNP | 37 |
| 2 | L1TD1     | uc021ooc.1 | Missense_Mutation | SNP | 37 |
| 2 | C20orf43  | uc010zzf.1 | 5'UTR             | SNP | 37 |
| 2 | COL14A1   | uc003yox.3 | Missense_Mutation | SNP | 37 |
| 2 | RELB      | uc021uvq.1 | Missense_Mutation | SNP | 37 |
| 2 | KCNT1     | uc011mdq.2 | Missense_Mutation | SNP | 37 |
| 2 | HIST1H2AA | uc003nfc.3 | 5'UTR             | SNP | 37 |
| 2 | KEL       | uc003wcb.3 | Silent            | SNP | 37 |
| 2 | THBS4     | uc021yaw.1 | Silent            | SNP | 37 |
| 2 | SIGLEC9   | uc010yct.2 | Missense_Mutation | SNP | 37 |
| 2 | DMGDH     | uc003kfs.3 | Nonsense_Mutation | SNP | 37 |
| 2 | GPR137C   | uc001wzt.4 | Missense_Mutation | SNP | 37 |
| 2 | NDOR1     | uc004clx.3 | 5'UTR             | SNP | 37 |
| 2 | KHDC1     | uc003pgo.3 | Missense_Mutation | SNP | 37 |
| 2 | GSK3B     | uc003edn.3 | 5'UTR             | SNP | 37 |
| 2 | MAD2L2    | uc001asp.3 | Silent            | SNP | 37 |

|   |            |            |                       |     |    |
|---|------------|------------|-----------------------|-----|----|
| 2 | MGAM       | uc003vwy.3 | Silent                | SNP | 37 |
| 2 | CLEC4GP1   | uc010xjy.1 | Non-coding_Transcript | SNP | 37 |
| 2 | TBX15      | uc001ehl.1 | Silent                | SNP | 37 |
| 2 | SIX4       | uc001xfc.3 | Missense_Mutation     | SNP | 37 |
| 2 | NDST3      | uc003ibx.3 | Missense_Mutation     | SNP | 37 |
| 2 | GRIN2A     | uc002czo.4 | Missense_Mutation     | SNP | 37 |
| 2 | DPYSL5     | uc002rhu.4 | Missense_Mutation     | SNP | 37 |
| 2 | PLCB1      | uc002wmz.1 | Silent                | SNP | 37 |
| 2 | AGAP2      | uc001spq.3 | Silent                | SNP | 37 |
| 2 | MAST2      | uc001cov.3 | Missense_Mutation     | SNP | 37 |
| 2 | SGPL1      | uc001jrm.3 | Missense_Mutation     | SNP | 37 |
| 2 | NPSR1      | uc003teh.1 | Silent                | SNP | 37 |
| 2 | PBX1       | uc001gct.3 | Missense_Mutation     | SNP | 37 |
| 2 | ANKRD30BP2 | uc002yiy.3 | Non-coding_Transcript | SNP | 37 |
| 2 | SDK1       | uc003smx.3 | Missense_Mutation     | SNP | 37 |
| 2 | C15orf32   | uc002brc.1 | Missense_Mutation     | SNP | 37 |
| 2 | OTOL1      | uc011bpb.2 | Missense_Mutation     | SNP | 37 |
| 2 | PLEKHG7    | uc001tcj.2 | Silent                | SNP | 37 |
| 2 | CPXCR1     | uc004efd.4 | Missense_Mutation     | SNP | 37 |
| 2 | IL31RA     | uc003jql.3 | Silent                | SNP | 37 |
| 2 | ATRNL1     | uc001lcg.3 | Missense_Mutation     | SNP | 37 |
| 2 | C3orf18    | uc003dar.3 | Silent                | SNP | 37 |
| 2 | CCDC33     | uc002axo.3 | Missense_Mutation     | SNP | 37 |
| 2 | DYDC1      | uc001kby.1 | 3'UTR                 | SNP | 37 |
| 2 | BPIFB6     | uc010zuc.2 | Silent                | SNP | 37 |
| 2 | SYNE1      | uc021zhb.1 | Silent                | SNP | 37 |
| 2 | CACNA1B    | uc004cog.3 | Splice_Site           | SNP | 37 |
| 2 | NBEAL2     | uc003cqp.3 | Missense_Mutation     | SNP | 37 |
| 2 | COL14A1    | uc003yox.3 | 3'UTR                 | SNP | 37 |
| 2 | ZNF521     | uc002kvk.2 | Intron                | SNP | 37 |
| 2 | CNNM3      | uc002swy.3 | Missense_Mutation     | SNP | 37 |
| 2 | MPP4       | uc002uyk.4 | Splice_Site           | SNP | 37 |
| 2 | SPATA7     | uc001xwq.3 | Missense_Mutation     | SNP | 37 |
| 2 | TMEM174    | uc010izc.3 | Missense_Mutation     | SNP | 37 |
| 2 | LRRIQ1     | uc001tac.3 | Missense_Mutation     | SNP | 37 |
| 2 | PDE4C      | uc010ebl.3 | 5'UTR                 | SNP | 37 |
| 2 | RNF150     | uc003iio.1 | Silent                | SNP | 37 |
| 2 | HIF1AN     | uc001krj.4 | Missense_Mutation     | SNP | 37 |
| 2 | TEK        | uc003zqi.4 | Nonsense_Mutation     | SNP | 37 |
| 2 | TMEM184A   | uc003skv.4 | Silent                | SNP | 37 |
| 2 | SLC4A8     | uc001rys.1 | Silent                | SNP | 37 |
| 2 | PCLO       | uc003uhx.2 | Missense_Mutation     | SNP | 37 |
| 2 | SLC44A5    | uc010oqz.1 | Missense_Mutation     | SNP | 37 |

|   |           |            |                       |     |    |
|---|-----------|------------|-----------------------|-----|----|
| 2 | GLB1L3    | uc009zdf.3 | 3'UTR                 | SNP | 37 |
| 2 | C11orf84  | uc001nxt.3 | Missense_Mutation     | SNP | 37 |
| 2 | SOX7      | uc011kwz.2 | Missense_Mutation     | SNP | 37 |
| 2 | PI15      | uc003yal.3 | Silent                | SNP | 37 |
| 2 | BC139719  | uc002fqj.3 | 3'UTR                 | SNP | 37 |
| 2 | CAPN10    | uc002vzk.2 | Silent                | SNP | 37 |
| 2 | TNFRSF11A | uc002lin.3 | Silent                | SNP | 37 |
| 2 | CACNA1A   | uc010xne.2 | Silent                | SNP | 37 |
| 2 | SPHK1     | uc002jrj.2 | Missense_Mutation     | SNP | 37 |
| 2 | MYLK2     | uc002wwq.2 | Silent                | SNP | 37 |
| 2 | TRPC4     | uc010abx.3 | Silent                | SNP | 37 |
| 2 | C14orf101 | uc001xcm.3 | Silent                | SNP | 37 |
| 2 | RASGRF2   | uc003kha.2 | Missense_Mutation     | SNP | 37 |
| 2 | POTEG     | uc001vuz.1 | Missense_Mutation     | SNP | 37 |
| 2 | SLC38A1   | uc009zjk.1 | Missense_Mutation     | SNP | 37 |
| 2 | TMC5      | uc002dgc.4 | Missense_Mutation     | SNP | 37 |
| 2 | MST4      | uc011mux.1 | Missense_Mutation     | SNP | 37 |
| 2 | NRXN3     | uc001xum.1 | Non-coding_Transcript | SNP | 37 |
| 2 | ADAMTS9   | uc003dmg.3 | Missense_Mutation     | SNP | 37 |
| 2 | ACMSD     | uc002ttz.3 | Missense_Mutation     | SNP | 37 |
| 2 | LALBA     | uc001rrt.3 | Silent                | SNP | 37 |
| 2 | HTR5A     | uc003wlu.1 | Missense_Mutation     | SNP | 37 |
| 2 | ART3      | uc003hjo.3 | Missense_Mutation     | SNP | 37 |
| 2 | ADSL      | uc003ayp.4 | Silent                | SNP | 37 |
| 2 | TAF1L     | uc003zrg.1 | Silent                | SNP | 37 |
| 2 | APC       | uc003kpz.4 | Missense_Mutation     | SNP | 37 |
| 2 | OR2T34    | uc001iep.1 | Missense_Mutation     | SNP | 37 |
| 2 | PIEZO2    | uc002kos.2 | Silent                | SNP | 37 |
| 2 | COL17A1   | uc001kxr.3 | Silent                | SNP | 37 |
| 2 | HCN1      | uc003jok.3 | Missense_Mutation     | SNP | 37 |
| 2 | C2orf63   | uc002ryi.2 | Splice_Site           | SNP | 37 |
| 2 | TSPAN16   | uc002mqv.1 | Intron                | SNP | 37 |
| 2 | PIP5KL1   | uc011mao.2 | Silent                | SNP | 37 |
| 2 | MYT1      | uc002yii.3 | Silent                | SNP | 37 |
| 2 | OR11H12   | uc010tkp.2 | Silent                | SNP | 37 |
| 2 | CASC3     | uc010cwt.1 | Missense_Mutation     | SNP | 37 |
| 2 | PLXNB2    | uc003bkv.4 | Missense_Mutation     | SNP | 37 |
| 2 | ZFP42     | uc003izh.1 | 3'UTR                 | SNP | 37 |
| 2 | GLT25D1   | uc002nhc.1 | Nonsense_Mutation     | SNP | 37 |
| 2 | BAGE      | uc002yit.1 | Intron                | SNP | 37 |
| 2 | EGR1      | uc003ldb.1 | Missense_Mutation     | SNP | 37 |
| 2 | CTIF      | uc002idd.3 | Nonsense_Mutation     | SNP | 37 |
| 2 | WDHD1     | uc001xbm.2 | Missense_Mutation     | SNP | 37 |

|   |            |            |                   |     |    |
|---|------------|------------|-------------------|-----|----|
| 2 | MRPL1      | uc003hku.2 | Missense_Mutation | SNP | 37 |
| 2 | XPO6       | uc002dpa.1 | Missense_Mutation | SNP | 37 |
| 2 | USP34      | uc002sbe.3 | Missense_Mutation | SNP | 37 |
| 2 | BC139719   | uc002fqj.3 | Missense_Mutation | SNP | 37 |
| 2 | CSMD3      | uc003ynu.3 | Missense_Mutation | SNP | 37 |
| 2 | TRIML1     | uc003izm.1 | Silent            | SNP | 37 |
| 2 | PCDHB6     | uc003lir.3 | Silent            | SNP | 37 |
| 2 | OR4C13     | uc010rhz.2 | Missense_Mutation | SNP | 37 |
| 2 | SMARCC1    | uc003crq.2 | Missense_Mutation | SNP | 37 |
| 2 | LY75-CD302 | uc002ubb.4 | Missense_Mutation | SNP | 37 |
| 2 | LEPREL1    | uc011bsk.2 | Silent            | SNP | 37 |
| 2 | CD1B       | uc001frx.3 | Missense_Mutation | SNP | 37 |
| 2 | ASPM       | uc001gtu.3 | Nonsense_Mutation | SNP | 37 |
| 2 | CYLD       | uc021tib.1 | Silent            | SNP | 37 |
| 2 | GPC3       | uc010nrn.2 | Splice_Site       | SNP | 37 |
| 2 | COL3A1     | uc002uqj.1 | 3'UTR             | SNP | 37 |
| 2 | REG1B      | uc002sny.2 | Missense_Mutation | SNP | 37 |
| 2 | EIF5       | uc001ymq.3 | 3'UTR             | SNP | 37 |
| 2 | COL23A1    | uc021yiz.1 | Missense_Mutation | SNP | 37 |
| 2 | CCDC141    | uc002une.2 | Missense_Mutation | SNP | 37 |
| 2 | IFIT5      | uc010qnh.2 | Silent            | SNP | 37 |
| 2 | DNAH5      | uc003jfd.2 | Missense_Mutation | SNP | 37 |
| 2 | CPA3       | uc003ewm.3 | Missense_Mutation | SNP | 37 |
| 2 | PRKAR1B    | uc003siu.2 | Missense_Mutation | SNP | 37 |
| 2 | WRNIP1     | uc003mtz.3 | Missense_Mutation | SNP | 37 |
| 2 | NEO1       | uc002avm.4 | Silent            | SNP | 37 |
| 2 | BOD1L2     | uc002lgm.3 | Missense_Mutation | SNP | 37 |
| 2 | FGFR4      | uc011dfw.1 | Missense_Mutation | SNP | 37 |
| 2 | UBQLNL     | uc001maz.4 | Silent            | SNP | 37 |
| 2 | PCDHB13    | uc003lja.1 | Missense_Mutation | SNP | 37 |
| 2 | ZNF394     | uc003uqs.3 | Missense_Mutation | SNP | 37 |
| 2 | DDX3X      | uc004dfe.3 | Missense_Mutation | SNP | 37 |
| 2 | NCOA2      | uc003xyn.1 | Missense_Mutation | SNP | 37 |
| 2 | FAM221A    | uc003swo.4 | Missense_Mutation | SNP | 37 |
| 2 | SETD1A     | uc002ead.1 | Silent            | SNP | 37 |
| 2 | IL36B      | uc002tiq.1 | Missense_Mutation | SNP | 37 |
| 2 | SLC7A2     | uc011kye.2 | Silent            | SNP | 37 |
| 2 | DCHS1      | uc001mem.1 | Silent            | SNP | 37 |
| 2 | KIAA2026   | uc003zjq.4 | Missense_Mutation | SNP | 37 |
| 2 | TCRA       | uc010ajk.2 | Missense_Mutation | SNP | 37 |
| 2 | AFF3       | uc002taf.3 | Silent            | SNP | 37 |
| 2 | PCK1       | uc002xyn.4 | Missense_Mutation | SNP | 37 |
| 2 | CCDC146    | uc003uga.3 | Missense_Mutation | SNP | 37 |

|   |          |            |                   |     |    |
|---|----------|------------|-------------------|-----|----|
| 2 | POTEF    | uc010fmh.2 | Missense_Mutation | SNP | 37 |
| 2 | NKRF     | uc022cdk.1 | Missense_Mutation | SNP | 37 |
| 2 | MAPT     | uc010dau.3 | Missense_Mutation | SNP | 37 |
| 2 | NMT1     | uc002ihz.3 | Silent            | SNP | 37 |
| 2 | SULF1    | uc010lza.1 | Missense_Mutation | SNP | 37 |
| 2 | MECOM    | uc011bpj.1 | Missense_Mutation | SNP | 37 |
| 2 | C1orf87  | uc001czs.2 | Missense_Mutation | SNP | 37 |
| 2 | ZNF205   | uc002cub.3 | Intron            | SNP | 37 |
| 2 | SLC8A2   | uc010ele.3 | Missense_Mutation | SNP | 37 |
| 2 | FLJ45340 | uc010lll.2 | 3'UTR             | SNP | 37 |
| 2 | BDKRB2   | uc010avm.1 | Silent            | SNP | 37 |
| 2 | CDCA5    | uc001ocp.2 | Silent            | SNP | 37 |
| 2 | GPR63    | uc010kcl.3 | 3'UTR             | SNP | 37 |
| 2 | SLC22A17 | uc001wjl.3 | Silent            | SNP | 37 |
| 2 | ZC3H12A  | uc001cbb.4 | Silent            | SNP | 37 |
| 2 | GPR111   | uc010jzj.1 | Missense_Mutation | SNP | 37 |
| 2 | OR2A12   | uc011kty.2 | Nonsense_Mutation | SNP | 37 |
| 2 | CD163    | uc001qs.3  | Missense_Mutation | SNP | 37 |
| 2 | PDE4DIP  | uc021ouh.1 | Missense_Mutation | SNP | 37 |
| 2 | SRSF7    | uc002rqz.3 | 5'UTR             | SNP | 37 |
| 2 | FAM108A1 | uc002lue.3 | 3'UTR             | SNP | 37 |
| 2 | FPR2     | uc002pxr.3 | Missense_Mutation | SNP | 37 |
| 2 | CLTCL1   | uc021wle.1 | Silent            | SNP | 37 |
| 2 | SYNE1    | uc021zhh.1 | Silent            | SNP | 37 |
| 2 | ZNF138   | uc011kdq.2 | Missense_Mutation | SNP | 37 |
| 2 | SGCZ     | uc003wwq.3 | Missense_Mutation | SNP | 37 |
| 2 | DNAH5    | uc003jfd.2 | Missense_Mutation | SNP | 37 |
| 2 | MFI2     | uc003fxk.4 | Missense_Mutation | SNP | 37 |
| 2 | SEMA4A   | uc001fnl.3 | Silent            | SNP | 37 |
| 2 | RP1      | uc003xsd.1 | Missense_Mutation | SNP | 37 |
| 2 | GRM3     | uc010lef.3 | Nonsense_Mutation | SNP | 37 |
| 2 | SLC36A3  | uc003ltx.2 | Missense_Mutation | SNP | 37 |
| 2 | SPAG11B  | uc003wrl.3 | Missense_Mutation | SNP | 37 |
| 2 | CELSR3   | uc003cuf.1 | Silent            | SNP | 37 |
| 2 | IQCH     | uc002aqo.2 | Missense_Mutation | SNP | 37 |
| 2 | KCNQ2    | uc002yey.1 | Missense_Mutation | SNP | 37 |
| 2 | OR52J3   | uc010qyv.2 | Silent            | SNP | 37 |
| 2 | PCLO     | uc003uhx.2 | Missense_Mutation | SNP | 37 |
| 2 | ADAM32   | uc003xmt.4 | Silent            | SNP | 37 |
| 2 | SLC25A13 | uc003uog.4 | Silent            | SNP | 37 |
| 2 | RGNEF    | uc010izf.3 | Missense_Mutation | SNP | 37 |
| 2 | SLC23A2  | uc002wli.3 | Missense_Mutation | SNP | 37 |
| 2 | EPRS     | uc001hly.1 | Missense_Mutation | SNP | 37 |

|   |          |            |                   |     |    |
|---|----------|------------|-------------------|-----|----|
| 2 | SYT1     | uc001sys.3 | Missense_Mutation | SNP | 37 |
| 2 | DIXDC1   | uc001pml.3 | Missense_Mutation | SNP | 37 |
| 2 | TCRA     | uc001wct.4 | Missense_Mutation | SNP | 37 |
| 2 | RCAN2    | uc003oyc.2 | 3'UTR             | SNP | 37 |
| 2 | JAK3     | uc002nhn.4 | Missense_Mutation | SNP | 37 |
| 2 | DNAH1    | uc011bef.2 | Silent            | SNP | 37 |
| 2 | TBXAS1   | uc011kqv.2 | Silent            | SNP | 37 |
| 2 | FSD1     | uc002lzy.2 | Nonsense_Mutation | SNP | 37 |
| 2 | CLUL1    | uc010wys.2 | Missense_Mutation | SNP | 37 |
| 2 | MACF1    | uc021olw.1 | Missense_Mutation | SNP | 37 |
| 2 | HGF      | uc003uhl.3 | Missense_Mutation | SNP | 37 |
| 2 | GRAMD2   | uc002atq.3 | 3'UTR             | SNP | 37 |
| 2 | KCNJ1    | uc001qeo.1 | Missense_Mutation | SNP | 37 |
| 2 | F9       | uc004fas.1 | Missense_Mutation | SNP | 37 |
| 2 | KRT6B    | uc001sak.3 | Missense_Mutation | SNP | 37 |
| 2 | XDH      | uc002rnv.1 | Missense_Mutation | SNP | 37 |
| 2 | KRTAP5-6 | uc001lua.3 | Silent            | SNP | 37 |
| 2 | DPPA3    | uc001qtf.3 | Missense_Mutation | SNP | 37 |
| 2 | ZGLP1    | uc002mnw.4 | Silent            | SNP | 37 |
| 2 | GAD2     | uc001isp.2 | Splice_Site       | SNP | 37 |
| 2 | FMN2     | uc010pye.2 | Silent            | SNP | 37 |
| 2 | RBBP6    | uc002dmh.3 | Missense_Mutation | SNP | 37 |
| 2 | GNAT2    | uc001dya.3 | Missense_Mutation | SNP | 37 |
| 2 | COL6A3   | uc002vwl.2 | Missense_Mutation | SNP | 37 |
| 2 | ECE2     | uc003fni.4 | Silent            | SNP | 37 |
| 2 | POLR3D   | uc003xbl.3 | Silent            | SNP | 37 |
| 2 | ATP13A1  | uc002nnh.4 | Missense_Mutation | SNP | 37 |
| 2 | ZNF434   | uc002cux.4 | Missense_Mutation | SNP | 37 |
| 2 | RSPH1    | uc002zbg.3 | Missense_Mutation | SNP | 37 |
| 2 | ZNF30    | uc010edq.1 | Silent            | SNP | 37 |
| 2 | SPINK4   | uc003zsh.3 | Silent            | SNP | 37 |
| 2 | ZNF230   | uc002oyb.1 | Missense_Mutation | SNP | 37 |
| 2 | FLG      | uc001ezu.1 | Missense_Mutation | SNP | 37 |
| 2 | HECA     | uc003qin.3 | Silent            | SNP | 37 |
| 2 | CCDC99   | uc003mae.4 | Silent            | SNP | 37 |
| 2 | FAM184A  | uc003pyj.3 | Missense_Mutation | SNP | 37 |
| 2 | HSPB1    | uc003uew.3 | Missense_Mutation | SNP | 37 |
| 2 | WSCD1    | uc010cli.3 | Silent            | SNP | 37 |
| 2 | C11orf53 | uc001plc.3 | Missense_Mutation | SNP | 37 |
| 2 | KRT27    | uc002hvg.3 | Silent            | SNP | 37 |
| 2 | ATP6V1B1 | uc002shj.3 | Silent            | SNP | 37 |
| 2 | ARHGAP22 | uc001jgu.3 | Missense_Mutation | SNP | 37 |
| 2 | ZEB2     | uc002tvu.3 | Silent            | SNP | 37 |

|   |          |            |                       |     |    |
|---|----------|------------|-----------------------|-----|----|
| 2 | ASB4     | uc003unx.3 | 3'UTR                 | SNP | 37 |
| 2 | RUNX1T1  | uc003yfg.2 | 3'UTR                 | SNP | 37 |
| 2 | CATSPERB | uc001xzs.1 | Missense_Mutation     | SNP | 37 |
| 2 | ODZ4     | uc001ozl.4 | Missense_Mutation     | SNP | 37 |
| 2 | LRP2     | uc002ues.3 | Silent                | SNP | 37 |
| 2 | XRCC1    | uc002owt.2 | Missense_Mutation     | SNP | 37 |
| 2 | NOS1AP   | uc001gbv.2 | Missense_Mutation     | SNP | 37 |
| 2 | TRAPPC9  | uc003yvh.2 | Missense_Mutation     | SNP | 37 |
| 2 | ZNF70    | uc002zxs.3 | Silent                | SNP | 37 |
| 2 | LRP1B    | uc002tvj.1 | Missense_Mutation     | SNP | 37 |
| 2 | SLIT3    | uc010jgg.3 | 3'UTR                 | SNP | 37 |
| 2 | CHD9     | uc002ehb.3 | Silent                | SNP | 37 |
| 2 | Unknown  |            | IGR                   | SNP | 37 |
| 2 | BCLAF1   | uc003qgx.1 | 5'UTR                 | SNP | 37 |
| 2 | STARD13  | uc001uuw.3 | Splice_Site           | SNP | 37 |
| 2 | TUBGCP2  | uc010qvc.1 | Silent                | SNP | 37 |
| 2 | MMS22L   | uc003ppb.3 | 3'UTR                 | SNP | 37 |
| 2 | FLJ45340 | uc010lll.2 | 3'UTR                 | SNP | 37 |
| 2 | TMC7     | uc002dfp.2 | Missense_Mutation     | SNP | 37 |
| 2 | SCN9A    | uc010fpl.3 | Missense_Mutation     | SNP | 37 |
| 2 | OVOS2    | uc010sjy.1 | Missense_Mutation     | SNP | 37 |
| 2 | UNKL     | uc010brn.2 | Missense_Mutation     | SNP | 37 |
| 2 | OR4N3P   | uc001yuf.3 | Silent                | SNP | 37 |
| 2 | TTN      | uc021vsy.1 | Missense_Mutation     | SNP | 37 |
| 2 | PMCH     | uc001tjl.3 | Missense_Mutation     | SNP | 37 |
| 2 | PAK4     | uc002okj.1 | Silent                | SNP | 37 |
| 2 | PKM2     | uc002aty.2 | Silent                | SNP | 37 |
| 2 | ISM1     | uc010gce.1 | Missense_Mutation     | SNP | 37 |
| 2 | ATP7A    | uc004ecx.4 | 3'UTR                 | SNP | 37 |
| 2 | RYR3     | uc001zhi.3 | Missense_Mutation     | SNP | 37 |
| 2 | DDX12P   | uc001qvy.1 | 3'UTR                 | SNP | 37 |
| 2 | CCDC88B  | uc001nzy.3 | Silent                | SNP | 37 |
| 2 | FLG      | uc001ezu.1 | Missense_Mutation     | SNP | 37 |
| 2 | ZNF438   | uc010qdz.2 | Missense_Mutation     | SNP | 37 |
| 2 | abParts  | uc021wml.1 | Non-coding_Transcript | SNP | 37 |
| 2 | HSD3B2   | uc001ehs.3 | Silent                | SNP | 37 |
| 2 | ASTL     | uc010yui.2 | Silent                | SNP | 37 |
| 2 | NRD1     | uc001ctc.4 | Missense_Mutation     | SNP | 37 |
| 2 | GRIK3    | uc001cba.1 | 3'UTR                 | SNP | 37 |
| 2 | MITF     | uc003dnz.3 | Silent                | SNP | 37 |
| 2 | XK       | uc004ddq.3 | Silent                | SNP | 37 |
| 2 | DNAH9    | uc002gne.3 | Missense_Mutation     | SNP | 37 |
| 2 | NRXN3    | uc001xun.3 | Missense_Mutation     | SNP | 37 |

|   |          |            |                   |     |    |
|---|----------|------------|-------------------|-----|----|
| 2 | HEATR1   | uc001hyd.2 | Missense_Mutation | SNP | 37 |
| 2 | YIPF1    | uc001cvu.3 | Missense_Mutation | SNP | 37 |
| 2 | PTPRN2   | uc011kwa.2 | Missense_Mutation | SNP | 37 |
| 2 | MYH2     | uc010coi.3 | Silent            | SNP | 37 |
| 2 | MAST1    | uc002mvm.3 | Missense_Mutation | SNP | 37 |
| 2 | UBE3C    | uc010lqs.3 | Missense_Mutation | SNP | 37 |
| 2 | ACHE     | uc003uxe.3 | Missense_Mutation | SNP | 37 |
| 2 | RND1     | uc001rsn.3 | 5'UTR             | SNP | 37 |
| 2 | MAGEA6   | uc004ffq.1 | Silent            | SNP | 37 |
| 2 | CREBRF   | uc003mch.3 | Missense_Mutation | SNP | 37 |
| 2 | LAMA1    | uc002knm.3 | Missense_Mutation | SNP | 37 |
| 2 | CAMSAP3  | uc002mgu.4 | Missense_Mutation | SNP | 37 |
| 2 | DAB1     | uc001cys.1 | Missense_Mutation | SNP | 37 |
| 2 | IGFN1    | uc001gwc.3 | 3'UTR             | SNP | 37 |
| 2 | PALLD    | uc011cjl.2 | Splice_Site       | SNP | 37 |
| 2 | USP54    | uc001juo.3 | Nonsense_Mutation | SNP | 37 |
| 2 | Unknown  |            | IGR               | SNP | 37 |
| 2 | TXNRD1   | uc021rcx.1 | Missense_Mutation | SNP | 37 |
| 2 | TRIM17   | uc001hsu.3 | Missense_Mutation | SNP | 37 |
| 2 | ZFP112   | uc010xwy.2 | Missense_Mutation | SNP | 37 |
| 2 | AGAP3    | uc003wjg.1 | Missense_Mutation | SNP | 37 |
| 2 | SBNO2    | uc010dsf.3 | Missense_Mutation | SNP | 37 |
| 2 | MED16    | uc002lqd.1 | Silent            | SNP | 37 |
| 2 | CTSD     | uc001luc.2 | Missense_Mutation | SNP | 37 |
| 2 | CUX1     | uc003uys.4 | Nonsense_Mutation | SNP | 37 |
| 2 | OR51V1   | uc010qyz.2 | Missense_Mutation | SNP | 37 |
| 2 | ZNF480   | uc010ydl.2 | Missense_Mutation | SNP | 37 |
| 2 | ZNF626   | uc002npb.1 | Nonsense_Mutation | SNP | 37 |
| 2 | C16orf91 | uc010uvd.2 | Missense_Mutation | SNP | 37 |
| 2 | CNOT10   | uc011axi.1 | 3'UTR             | SNP | 37 |
| 2 | BEND2    | uc004cyj.4 | 3'UTR             | SNP | 37 |
| 2 | LAMA3    | uc002kuq.3 | Missense_Mutation | SNP | 37 |
| 2 | RNF112   | uc010vyu.2 | Silent            | SNP | 37 |
| 2 | DNAH17   | uc010dhp.2 | Silent            | SNP | 37 |
| 2 | ELAVL2   | uc003zpu.3 | Silent            | SNP | 37 |
| 2 | KLF2     | uc002ndw.3 | 5'UTR             | SNP | 37 |
| 2 | DGKB     | uc003ssz.3 | Missense_Mutation | SNP | 37 |
| 2 | KHDRBS3  | uc003yuv.3 | Missense_Mutation | SNP | 37 |
| 2 | DYSF     | uc010fen.3 | Silent            | SNP | 37 |
| 2 | KIAA0100 | uc002hbu.3 | Missense_Mutation | SNP | 37 |
| 2 | NWD1     | uc002neu.4 | Silent            | SNP | 37 |
| 2 | ACAP3    | uc001aeb.2 | Silent            | SNP | 37 |
| 2 | WFDC10B  | uc002xpc.3 | 5'UTR             | SNP | 37 |



|   |          |            |                   |     |    |
|---|----------|------------|-------------------|-----|----|
| 2 | FAM13B   | uc003lbz.2 | Missense_Mutation | SNP | 37 |
| 2 | ALMS1    | uc002sje.1 | Missense_Mutation | SNP | 37 |
| 2 | DNAH3    | uc010vbe.2 | Missense_Mutation | SNP | 37 |
| 2 | MCCC2    | uc003kbs.4 | Missense_Mutation | SNP | 37 |
| 2 | ACTG1    | uc002kak.2 | Intron            | SNP | 37 |
| 2 | FAM26D   | uc003pxa.3 | Missense_Mutation | SNP | 37 |
| 2 | ASB6     | uc011mbt.2 | Missense_Mutation | SNP | 37 |
| 2 | SCG3     | uc002abh.3 | Missense_Mutation | SNP | 37 |
| 2 | ZNF549   | uc002qpb.2 | Missense_Mutation | SNP | 37 |
| 2 | ZCCHC17  | uc001bsp.1 | Silent            | SNP | 37 |
| 2 | WRAP53   | uc010vuh.2 | Missense_Mutation | SNP | 37 |
| 2 | SP140    | uc002vql.3 | 5'UTR             | SNP | 37 |
| 2 | ARHGAP26 | uc011dbj.2 | Missense_Mutation | SNP | 37 |
| 2 | KNDC1    | uc001llz.1 | Nonsense_Mutation | SNP | 37 |
| 2 | ATP10B   | uc003lym.1 | Missense_Mutation | SNP | 37 |
| 2 | VAV1     | uc002mfu.1 | Missense_Mutation | SNP | 37 |
| 2 | RBFOX1   | uc002cyw.2 | Silent            | SNP | 37 |
| 2 | SGSM1    | uc003abg.2 | Missense_Mutation | SNP | 37 |
| 2 | WAPAL    | uc001kdn.3 | Missense_Mutation | SNP | 37 |
| 2 | PBXIP1   | uc001ffr.3 | Missense_Mutation | SNP | 37 |
| 2 | LRRC4C   | uc001mxa.1 | Missense_Mutation | SNP | 37 |
| 2 | FLT3     | uc001urw.3 | Missense_Mutation | SNP | 37 |
| 2 | EPN1     | uc002qlx.3 | Missense_Mutation | SNP | 37 |
| 2 | GLDN     | uc002aba.3 | Missense_Mutation | SNP | 37 |
| 2 | CAPRIN1  | uc001mvh.1 | Missense_Mutation | SNP | 37 |
| 2 | PXDNL    | uc003xqu.4 | Silent            | SNP | 37 |
| 2 | PODN     | uc001cuv.3 | Missense_Mutation | SNP | 37 |
| 2 | LRIT1    | uc001kcz.1 | Missense_Mutation | SNP | 37 |
| 2 | TRPM1    | uc021sia.1 | Missense_Mutation | SNP | 37 |
| 2 | OR52R1   | uc021qcs.1 | Silent            | SNP | 37 |
| 2 | PEAK1    | uc021sqy.1 | Silent            | SNP | 37 |
| 2 | TRPV6    | uc003wbx.2 | Silent            | SNP | 37 |
| 2 | SUSD2    | uc002zzn.1 | 3'UTR             | SNP | 37 |
| 2 | IL1RL1   | uc002tbu.1 | Missense_Mutation | SNP | 37 |
| 2 | KCNIP1   | uc010jjq.3 | Silent            | SNP | 37 |
| 2 | RAB3C    | uc003jrp.3 | Missense_Mutation | SNP | 37 |
| 2 | STAT5B   | uc002hzh.3 | 3'UTR             | SNP | 37 |
| 2 | FAM18A   | uc010buo.1 | Silent            | SNP | 37 |
| 2 | PENK     | uc003xsz.2 | Missense_Mutation | SNP | 37 |
| 2 | TYRP1    | uc003zkv.4 | 3'UTR             | SNP | 37 |
| 2 | AQP11    | uc001oyj.3 | Missense_Mutation | SNP | 37 |
| 2 | ADAMTS6  | uc003jtp.3 | Silent            | SNP | 37 |
| 2 | GHR      | uc021xxv.1 | Silent            | SNP | 37 |

|   |          |            |                       |     |    |
|---|----------|------------|-----------------------|-----|----|
| 2 | GCK      | uc003tkk.1 | Missense_Mutation     | SNP | 37 |
| 2 | P2RX5    | uc002fwi.3 | Missense_Mutation     | SNP | 37 |
| 2 | THRB     | uc003ccz.4 | Missense_Mutation     | SNP | 37 |
| 2 | SETD1A   | uc002ead.1 | Missense_Mutation     | SNP | 37 |
| 2 | ACN9     | uc003uoo.4 | Missense_Mutation     | SNP | 37 |
| 2 | UNC79    | uc001ybv.1 | 3'UTR                 | SNP | 37 |
| 2 | PSD2     | uc003leu.1 | Silent                | SNP | 37 |
| 2 | TMEM61   | uc001cyd.3 | Silent                | SNP | 37 |
| 2 | TAP2     | uc003oca.3 | Silent                | SNP | 37 |
| 2 | GPR179   | uc002hpz.3 | Missense_Mutation     | SNP | 37 |
| 2 | ZNF208   | uc021urr.1 | Missense_Mutation     | SNP | 37 |
| 2 | TUBB6    | uc002kqw.3 | Silent                | SNP | 37 |
| 2 | CACNA1E  | uc009wxt.3 | Splice_Site           | SNP | 37 |
| 2 | MUC16    | uc002mkp.3 | Missense_Mutation     | SNP | 37 |
| 2 | SERPINA5 | uc001ydm.2 | Missense_Mutation     | SNP | 37 |
| 2 | ELFN2    | uc003asq.4 | Missense_Mutation     | SNP | 37 |
| 2 | MICU1    | uc001jtb.2 | Missense_Mutation     | SNP | 37 |
| 2 | OR4N4    | uc001yuc.1 | Silent                | SNP | 37 |
| 2 | FH       | uc001hyx.3 | Missense_Mutation     | SNP | 37 |
| 2 | KLHL4    | uc004efa.2 | Missense_Mutation     | SNP | 37 |
| 2 | ADAMTS19 | uc003kvb.1 | Splice_Site           | SNP | 37 |
| 2 | BAAT     | uc010mtd.3 | Missense_Mutation     | SNP | 37 |
| 2 | GLG1     | uc002fcx.3 | Silent                | SNP | 37 |
| 2 | SCAPER   | uc002bby.3 | Missense_Mutation     | SNP | 37 |
| 2 | A1BG     | uc002qsd.4 | Silent                | SNP | 37 |
| 2 | BAZ2A    | uc001slq.1 | Silent                | SNP | 37 |
| 2 | PATL1    | uc001noe.4 | Missense_Mutation     | SNP | 37 |
| 2 | RACGAP1  | uc001rvt.2 | Silent                | SNP | 37 |
| 2 | MUC16    | uc002mkp.3 | Missense_Mutation     | SNP | 37 |
| 2 | CAPN13   | uc021vfn.1 | Missense_Mutation     | SNP | 37 |
| 2 | abParts  | uc021ser.1 | Non-coding_Transcript | SNP | 37 |
| 2 | SH3RF2   | uc003Int.3 | Missense_Mutation     | SNP | 37 |
| 2 | TBX21    | uc002ilv.1 | Missense_Mutation     | SNP | 37 |
| 2 | SDR16C5  | uc010lyk.1 | Missense_Mutation     | SNP | 37 |
| 2 | PLEKHG2  | uc010xuz.2 | Missense_Mutation     | SNP | 37 |
| 2 | SNX29    | uc002dby.4 | Missense_Mutation     | SNP | 37 |
| 2 | SLCO1B1  | uc001req.4 | Missense_Mutation     | SNP | 37 |
| 2 | PLEKHM1P | uc002jew.4 | 5'UTR                 | SNP | 37 |
| 2 | NYNRIN   | uc001wpf.4 | Nonsense_Mutation     | SNP | 37 |
| 2 | CEP164   | uc001prc.3 | Silent                | SNP | 37 |
| 2 | SLC9A8   | uc002xuv.1 | Silent                | SNP | 37 |
| 2 | TGFB3    | uc001xsc.2 | Silent                | SNP | 37 |
| 2 | EFCAB6   | uc003bdy.2 | Silent                | SNP | 37 |

|   |          |            |                       |     |    |
|---|----------|------------|-----------------------|-----|----|
| 2 | RPS16    | uc002olm.3 | Silent                | SNP | 37 |
| 2 | MUM1L1   | uc004emg.2 | Silent                | SNP | 37 |
| 2 | OR9K2    | uc010spe.2 | Silent                | SNP | 37 |
| 2 | CYP3A4   | uc003urv.2 | Nonsense_Mutation     | SNP | 37 |
| 2 | SYNE1    | uc021zhb.1 | Missense_Mutation     | SNP | 37 |
| 2 | LRRCC1   | uc003ycw.3 | Splice_Site           | SNP | 37 |
| 2 | C16orf78 | uc002efr.3 | Missense_Mutation     | SNP | 37 |
| 2 | MUC16    | uc002mkp.3 | Missense_Mutation     | SNP | 37 |
| 2 | DNMT1    | uc010xl.2  | Missense_Mutation     | SNP | 37 |
| 2 | NMT1     | uc002ihz.3 | Missense_Mutation     | SNP | 37 |
| 2 | WDR72    | uc002acj.2 | Missense_Mutation     | SNP | 37 |
| 2 | CARS     | uc001lxf.3 | 3'UTR                 | SNP | 37 |
| 2 | BAI1     | uc003ywm.3 | Missense_Mutation     | SNP | 37 |
| 2 | LSM4     | uc002niq.3 | Missense_Mutation     | SNP | 37 |
| 2 | ZNF583   | uc010ygl.1 | Missense_Mutation     | SNP | 37 |
| 2 | ZNF573   | uc002ohe.3 | 3'UTR                 | SNP | 37 |
| 2 | TF       | uc003epu.2 | Silent                | SNP | 37 |
| 2 | ZNF507   | uc002nte.3 | Missense_Mutation     | SNP | 37 |
| 2 | ITGA9    | uc003chd.3 | Missense_Mutation     | SNP | 37 |
| 2 | TTC21A   | uc003cjc.2 | Missense_Mutation     | SNP | 37 |
| 2 | MSR1     | uc010lsu.3 | Missense_Mutation     | SNP | 37 |
| 2 | PPP1CA   | uc001okx.1 | Silent                | SNP | 37 |
| 2 | SREK1    | uc003jun.3 | Missense_Mutation     | SNP | 37 |
| 2 | PRAMEF2  | uc001aum.1 | Missense_Mutation     | SNP | 37 |
| 2 | NOS2     | uc002gzu.3 | Missense_Mutation     | SNP | 37 |
| 2 | VHLL     | uc001fok.3 | Silent                | SNP | 37 |
| 2 | TPTEP1   | uc002zls.1 | Non-coding_Transcript | SNP | 37 |
| 2 | BAZ2A    | uc001slq.1 | Missense_Mutation     | SNP | 37 |
| 2 | MYO1F    | uc002mkg.3 | Silent                | SNP | 37 |
| 2 | CAP2     | uc003ncb.3 | Missense_Mutation     | SNP | 37 |
| 2 | PAM      | uc003knt.3 | Silent                | SNP | 37 |
| 2 | SLC4A9   | uc003lfm.2 | Missense_Mutation     | SNP | 37 |
| 2 | ANKRD30B | uc010dlo.2 | Intron                | SNP | 37 |
| 2 | ZDHHC5   | uc001nqx.1 | Missense_Mutation     | SNP | 37 |
| 2 | TKTL2    | uc003iqp.4 | Missense_Mutation     | SNP | 37 |
| 2 | PTRH1    | uc004bro.3 | 5'UTR                 | SNP | 37 |
| 2 | FCHSD2   | uc009ytl.3 | Missense_Mutation     | SNP | 37 |
| 2 | GRIN2B   | uc001rbt.2 | Silent                | SNP | 37 |
| 2 | ITGA9    | uc003chd.3 | Silent                | SNP | 37 |
| 2 | RHCE     | uc001bkf.3 | Missense_Mutation     | SNP | 37 |
| 2 | Unknown  |            | IGR                   | SNP | 37 |
| 2 | THSD7B   | uc002tvb.3 | 3'UTR                 | SNP | 37 |
| 2 | PCGF1    | uc002slz.3 | 3'UTR                 | SNP | 37 |

|   |             |            |                       |     |    |
|---|-------------|------------|-----------------------|-----|----|
| 2 | TGM7        | uc001zrf.1 | Missense_Mutation     | SNP | 37 |
| 2 | CDHR2       | uc021yie.1 | Silent                | SNP | 37 |
| 2 | NLRP13      | uc010ygg.2 | Silent                | SNP | 37 |
| 2 | ACSM2B      | uc002dhj.4 | Missense_Mutation     | SNP | 37 |
| 2 | NCSTN       | uc001fvx.3 | Missense_Mutation     | SNP | 37 |
| 2 | DNAJC14     | uc001shu.2 | Missense_Mutation     | SNP | 37 |
| 2 | DPY19L2P1   | uc003teq.1 | 5'UTR                 | SNP | 37 |
| 2 | TCOF1       | uc003lry.3 | Missense_Mutation     | SNP | 37 |
| 2 | DIXDC1      | uc001pml.3 | Missense_Mutation     | SNP | 37 |
| 2 | CTSD        | uc001luc.2 | Missense_Mutation     | SNP | 37 |
| 2 | ITPA        | uc002wid.3 | Missense_Mutation     | SNP | 37 |
| 2 | RAB11FIP1   | uc003xko.1 | 3'UTR                 | SNP | 37 |
| 2 | NCOA3       | uc002xtk.3 | Missense_Mutation     | SNP | 37 |
| 2 | PRDM14      | uc003xym.3 | Silent                | SNP | 37 |
| 2 | FLNC        | uc003vnz.4 | Silent                | SNP | 37 |
| 2 | MTDH        | uc003yhz.3 | Nonsense_Mutation     | SNP | 37 |
| 2 | OR7E91P     | uc002sho.3 | Non-coding_Transcript | SNP | 37 |
| 2 | BTN2A3P     | uc011dkl.1 | Missense_Mutation     | SNP | 37 |
| 2 | SSFA2       | uc002uoi.3 | Nonsense_Mutation     | SNP | 37 |
| 2 | IQCJ-SCHIP1 | uc003fcq.2 | Missense_Mutation     | SNP | 37 |
| 2 | MYBL1       | uc003xwj.3 | Missense_Mutation     | SNP | 37 |
| 2 | CCDC69      | uc003ltq.3 | Missense_Mutation     | SNP | 37 |
| 2 | TTN         | uc010zfk.1 | Missense_Mutation     | SNP | 37 |
| 2 | NAA50       | uc003ean.2 | 3'UTR                 | SNP | 37 |
| 2 | ZC3H3       | uc003yyd.2 | Missense_Mutation     | SNP | 37 |
| 2 | ONECUT2     | uc002lgo.3 | Missense_Mutation     | SNP | 37 |
| 2 | C16orf11    | uc002chk.3 | Missense_Mutation     | SNP | 37 |
| 2 | SPTBN5      | uc001zos.3 | Missense_Mutation     | SNP | 37 |
| 2 | ZKSCAN2     | uc002dod.4 | Nonsense_Mutation     | SNP | 37 |
| 2 | B4GALNT2    | uc002ion.2 | Silent                | SNP | 37 |
| 2 | DHX8        | uc002idu.1 | Missense_Mutation     | SNP | 37 |
| 2 | C7orf73     | uc003vsy.3 | 5'Flank               | SNP | 37 |
| 2 | DMBT1       | uc001ljk.1 | Splice_Site           | SNP | 37 |
| 2 | ANKRD30A    | uc021ppc.1 | Missense_Mutation     | SNP | 37 |
| 2 | PITPNM3     | uc002gdd.4 | Missense_Mutation     | SNP | 37 |
| 2 | NOS1        | uc001twn.2 | Silent                | SNP | 37 |
| 2 | BLZF1       | uc001gfx.2 | Missense_Mutation     | SNP | 37 |
| 2 | OR9A2       | uc003wcc.1 | Missense_Mutation     | SNP | 37 |
| 2 | COL24A1     | uc001dlj.3 | Missense_Mutation     | SNP | 37 |
| 2 | RASSF1      | uc003daa.1 | Splice_Site           | SNP | 37 |
| 2 | MAGEC3      | uc011mwp.2 | Missense_Mutation     | SNP | 37 |
| 2 | SRCIN1      | uc002hqd.3 | Splice_Site           | SNP | 37 |
| 2 | TAF1L       | uc003zrg.1 | 5'UTR                 | SNP | 37 |

|   |           |            |                       |     |    |
|---|-----------|------------|-----------------------|-----|----|
| 2 | ZNF662    | uc003cmi.2 | Missense_Mutation     | SNP | 37 |
| 2 | DMGDH     | uc003kfs.3 | Missense_Mutation     | SNP | 37 |
| 2 | RP1L1     | uc003wtc.3 | Missense_Mutation     | SNP | 37 |
| 2 | ANK1      | uc003xom.3 | Missense_Mutation     | SNP | 37 |
| 2 | IFIT2     | uc009xts.3 | Missense_Mutation     | SNP | 37 |
| 2 | PCSK5     | uc004akc.2 | Missense_Mutation     | SNP | 37 |
| 2 | CAPRIN1   | uc001mvh.1 | Missense_Mutation     | SNP | 37 |
| 2 | CACNA1A   | uc010xne.2 | Splice_Site           | SNP | 37 |
| 2 | SRRM4     | uc001txa.2 | Missense_Mutation     | SNP | 37 |
| 2 | IGHE      | uc001yrw.1 | Intron                | SNP | 37 |
| 2 | TRAFD1    | uc001ttp.3 | 3'UTR                 | SNP | 37 |
| 2 | DPP10     | uc002tle.3 | Splice_Site           | SNP | 37 |
| 2 | TGFB2     | uc001hln.3 | Missense_Mutation     | SNP | 37 |
| 2 | XPR1      | uc001goi.3 | Missense_Mutation     | SNP | 37 |
| 2 | PSG7      | uc002ovl.4 | 3'UTR                 | SNP | 37 |
| 2 | NIN       | uc001wyi.3 | Missense_Mutation     | SNP | 37 |
| 2 | NYAP2     | uc002voe.2 | Missense_Mutation     | SNP | 37 |
| 2 | CNTNAP1   | uc002iay.3 | Nonsense_Mutation     | SNP | 37 |
| 2 | STK38L    | uc001rhr.3 | Missense_Mutation     | SNP | 37 |
| 2 | C1S       | uc001qsj.3 | Missense_Mutation     | SNP | 37 |
| 2 | RASIP1    | uc002pki.3 | 3'UTR                 | SNP | 37 |
| 2 | CDH20     | uc010dps.1 | Silent                | SNP | 37 |
| 2 | ZFHX4     | uc003yau.2 | Missense_Mutation     | SNP | 37 |
| 2 | KLK3      | uc021uyi.1 | Missense_Mutation     | SNP | 37 |
| 2 | FBXO40    | uc003eeg.2 | Silent                | SNP | 37 |
| 2 | EGFLAM    | uc003jlc.2 | Missense_Mutation     | SNP | 37 |
| 2 | ANKRD20A2 | uc010fhp.3 | Non-coding_Transcript | SNP | 37 |
| 2 | SEC14L3   | uc003ahy.3 | Silent                | SNP | 37 |
| 2 | PIK3C2G   | uc010sib.2 | Missense_Mutation     | SNP | 37 |
| 2 | UBA7      | uc003cxr.3 | Missense_Mutation     | SNP | 37 |
| 2 | TECTA     | uc010rzo.2 | Missense_Mutation     | SNP | 37 |
| 2 | MYO5B     | uc002leb.2 | Silent                | SNP | 37 |
| 2 | BCAM      | uc002ozu.3 | Missense_Mutation     | SNP | 37 |
| 2 | TNFRSF11A | uc002lin.3 | Missense_Mutation     | SNP | 37 |
| 2 | RNF157    | uc002jqz.3 | Silent                | SNP | 37 |
| 2 | ARF5      | uc003vmb.2 | Missense_Mutation     | SNP | 37 |
| 2 | DNAAF1    | uc002fhl.4 | Missense_Mutation     | SNP | 37 |
| 2 | PCDHB6    | uc003lir.3 | Missense_Mutation     | SNP | 37 |
| 2 | FAM18A    | uc010buo.1 | Missense_Mutation     | SNP | 37 |
| 2 | UGGT2     | uc001vmt.3 | Silent                | SNP | 37 |
| 2 | C1orf173  | uc001dgg.3 | Missense_Mutation     | SNP | 37 |
| 2 | COL5A3    | uc002mmq.1 | Splice_Site           | SNP | 37 |
| 2 | MGAM      | uc003vwy.3 | Missense_Mutation     | SNP | 37 |

|   |          |            |                   |     |    |
|---|----------|------------|-------------------|-----|----|
| 2 | USP40    | uc010zmr.2 | Silent            | SNP | 37 |
| 2 | ZNF407   | uc002llw.2 | Silent            | SNP | 37 |
| 2 | WDR72    | uc002acj.2 | Silent            | SNP | 37 |
| 2 | ZC3HAV1  | uc003vun.3 | Silent            | SNP | 37 |
| 2 | ZBTB11   | uc003dvf.2 | 3'UTR             | SNP | 37 |
| 2 | TRA      | uc021rpa.1 | Intron            | SNP | 37 |
| 2 | PCLO     | uc003uhx.2 | Missense_Mutation | SNP | 37 |
| 2 | TAB2     | uc003qmj.3 | Missense_Mutation | SNP | 37 |
| 2 | CAPS2    | uc001sxl.3 | Missense_Mutation | SNP | 37 |
| 2 | TBX15    | uc001ehl.1 | Missense_Mutation | SNP | 37 |
| 2 | POFUT2   | uc011afp.1 | 3'UTR             | SNP | 37 |
| 2 | TTN      | uc021vsy.1 | Silent            | SNP | 37 |
| 2 | MCCC1    | uc003fle.3 | Missense_Mutation | SNP | 37 |
| 2 | ADCY8    | uc003ytd.4 | Splice_Site       | SNP | 37 |
| 2 | CTNND2   | uc003jfa.1 | Splice_Site       | SNP | 37 |
| 2 | TMEM52   | uc001aij.2 | 3'UTR             | SNP | 37 |
| 2 | SYNE2    | uc001xgl.3 | Missense_Mutation | SNP | 37 |
| 2 | OR1C1    | uc010pza.2 | Silent            | SNP | 37 |
| 2 | GPR17    | uc010yzn.2 | Silent            | SNP | 37 |
| 2 | SLC7A8   | uc001wiz.3 | Silent            | SNP | 37 |
| 2 | CHD8     | uc001war.2 | Silent            | SNP | 37 |
| 2 | THPO     | uc021xii.1 | Missense_Mutation | SNP | 37 |
| 2 | CYSLTR2  | uc010acw.1 | Missense_Mutation | SNP | 37 |
| 2 | FAM65C   | uc010zyt.2 | Silent            | SNP | 37 |
| 2 | OR2C1    | uc002cuw.1 | Missense_Mutation | SNP | 37 |
| 2 | SCAMP4   | uc002luj.3 | Missense_Mutation | SNP | 37 |
| 2 | PARD6A   | uc002ett.3 | Silent            | SNP | 37 |
| 2 | TMEM132B | uc001uhe.1 | Silent            | SNP | 37 |
| 2 | OR10J5   | uc010piw.2 | Missense_Mutation | SNP | 37 |
| 2 | C19orf75 | uc002pwb.1 | Silent            | SNP | 37 |
| 2 | OR4M1    | uc010tku.2 | Missense_Mutation | SNP | 37 |
| 2 | VPS13A   | uc004akr.3 | Nonsense_Mutation | SNP | 37 |
| 2 | RPGRIP1L | uc002ehp.3 | Silent            | SNP | 37 |
| 2 | FABP7    | uc003pzd.3 | Missense_Mutation | SNP | 37 |
| 2 | PLXNB2   | uc003bku.1 | 5'UTR             | SNP | 37 |
| 2 | PLCE1    | uc001kjk.3 | Silent            | SNP | 37 |
| 2 | CLDN7    | uc002gfm.4 | Missense_Mutation | SNP | 37 |
| 2 | GRIN2D   | uc002pjc.4 | Missense_Mutation | SNP | 37 |
| 2 | JUP      | uc002hxs.2 | 3'UTR             | SNP | 37 |
| 2 | RDH8     | uc002mmr.3 | 3'UTR             | SNP | 37 |
| 2 | TOP3A    | uc002gsx.1 | Missense_Mutation | SNP | 37 |
| 2 | CD38     | uc003gol.1 | Nonsense_Mutation | SNP | 37 |
| 2 | C1QTNF2  | uc003lyd.3 | 3'UTR             | SNP | 37 |

|   |           |            |                   |     |    |
|---|-----------|------------|-------------------|-----|----|
| 2 | POTEF     | uc010fmh.2 | Silent            | SNP | 37 |
| 2 | ZNF394    | uc003uqs.3 | Silent            | SNP | 37 |
| 2 | LRRIQ3    | uc001dfy.4 | Missense_Mutation | SNP | 37 |
| 2 | OR5D16    | uc010rio.2 | Silent            | SNP | 37 |
| 2 | C14orf102 | uc001xyi.2 | Missense_Mutation | SNP | 37 |
| 2 | ZFHX3     | uc002fck.3 | Silent            | SNP | 37 |
| 2 | OTOL1     | uc011bpb.2 | Missense_Mutation | SNP | 37 |
| 2 | EVI2B     | uc010csq.2 | 3'UTR             | SNP | 37 |
| 2 | GRID1     | uc001kdl.1 | Nonsense_Mutation | SNP | 37 |
| 2 | VSTM1     | uc002qcw.4 | Silent            | SNP | 37 |
| 2 | FRRS1L    | uc004bdw.1 | Missense_Mutation | SNP | 37 |
| 2 | ZKSCAN3   | uc010jrc.3 | Missense_Mutation | SNP | 37 |
| 2 | PSG9      | uc002owd.4 | Missense_Mutation | SNP | 37 |
| 2 | MSRA      | uc003wsx.3 | Missense_Mutation | SNP | 37 |
| 2 | MOG       | uc003nne.3 | 3'UTR             | SNP | 37 |
| 2 | GNAO1     | uc002eit.4 | Silent            | SNP | 37 |
| 2 | TPRX1     | uc002php.2 | Silent            | SNP | 37 |
| 2 | CYP2C9    | uc001kka.4 | Silent            | SNP | 37 |
| 2 | SZT2      | uc001cjk.2 | Missense_Mutation | SNP | 37 |
| 2 | FGF6      | uc001qmr.1 | Missense_Mutation | SNP | 37 |
| 2 | ARAP1     | uc001osu.3 | Missense_Mutation | SNP | 37 |
| 2 | RASGRF2   | uc003kha.2 | Missense_Mutation | SNP | 37 |
| 2 | ABCB5     | uc010kuh.3 | Missense_Mutation | SNP | 37 |
| 2 | TEK       | uc003zqi.4 | Silent            | SNP | 37 |
| 2 | LAMA4     | uc003pvu.2 | Silent            | SNP | 37 |
| 2 | ZNF821    | uc010vmj.2 | Missense_Mutation | SNP | 37 |
| 2 | SLC17A6   | uc001mqk.3 | Missense_Mutation | SNP | 37 |
| 2 | ZNF629    | uc002dzs.1 | Missense_Mutation | SNP | 37 |
| 2 | ZC3H3     | uc003yyd.2 | Missense_Mutation | SNP | 37 |
| 2 | CHD4      | uc001qpp.3 | Silent            | SNP | 37 |
| 2 | AKAP9     | uc003ulg.3 | Missense_Mutation | SNP | 37 |
| 2 | ANK3      | uc001jky.3 | Missense_Mutation | SNP | 37 |
| 2 | BTG4      | uc001plj.3 | 5'Flank           | SNP | 37 |
| 2 | TNS1      | uc002vgt.2 | Missense_Mutation | SNP | 37 |
| 2 | MMP19     | uc001sib.3 | 5'UTR             | SNP | 37 |
| 2 | MUC16     | uc002mkp.3 | Silent            | SNP | 37 |
| 2 | DPP6      | uc003wlm.3 | 5'UTR             | SNP | 37 |
| 2 | BLM       | uc002bpr.3 | Missense_Mutation | SNP | 37 |
| 2 | MYH13     | uc002gmk.1 | Missense_Mutation | SNP | 37 |
| 2 | GLRA2     | uc010neq.3 | 3'UTR             | SNP | 37 |
| 2 | HCP5      | uc021yup.1 | 5'Flank           | SNP | 37 |
| 2 | PRRC2A    | uc003nvb.4 | Missense_Mutation | SNP | 37 |
| 2 | RGL3      | uc002mro.2 | Silent            | SNP | 37 |

|   |          |            |                       |     |    |
|---|----------|------------|-----------------------|-----|----|
| 2 | EPN2     | uc002gvd.4 | Missense_Mutation     | SNP | 37 |
| 2 | B4GALNT2 | uc002ion.2 | Silent                | SNP | 37 |
| 2 | TBC1D8   | uc010fiv.3 | Splice_Site           | SNP | 37 |
| 2 | KCNN1    | uc002nht.3 | Missense_Mutation     | SNP | 37 |
| 2 | FCRL6    | uc001fud.4 | Missense_Mutation     | SNP | 37 |
| 2 | COL7A1   | uc003ctz.2 | Missense_Mutation     | SNP | 37 |
| 2 | GPR125   | uc003gqm.1 | Silent                | SNP | 37 |
| 2 | SLC47A2  | uc002gwe.4 | Silent                | SNP | 37 |
| 2 | HECTD3   | uc009vxk.3 | Silent                | SNP | 37 |
| 2 | LAMB4    | uc010ljo.1 | Missense_Mutation     | SNP | 37 |
| 2 | ARVCF    | uc002zqz.3 | Missense_Mutation     | SNP | 37 |
| 2 | PIK3AP1  | uc001kmq.3 | Missense_Mutation     | SNP | 37 |
| 2 | SLC5A12  | uc001mra.2 | Missense_Mutation     | SNP | 37 |
| 2 | TRBV2    | uc011kro.1 | Intron                | SNP | 37 |
| 2 | DTD1     | uc002wrf.4 | Silent                | SNP | 37 |
| 2 | VPS13C   | uc002ahb.2 | 3'UTR                 | SNP | 37 |
| 2 | GLIS3    | uc003zhy.1 | 3'UTR                 | SNP | 37 |
| 2 | SH2D3C   | uc004bsc.3 | Missense_Mutation     | SNP | 37 |
| 2 | PCDHGC5  | uc003ljw.2 | Silent                | SNP | 37 |
| 2 | TRERF1   | uc003ose.2 | Missense_Mutation     | SNP | 37 |
| 2 | PLEKHG6  | uc001qns.3 | Missense_Mutation     | SNP | 37 |
| 2 | ST18     | uc003xqz.2 | Missense_Mutation     | SNP | 37 |
| 2 | OR4N4    | uc001yuc.1 | Missense_Mutation     | SNP | 37 |
| 2 | ZNF99    | uc021urt.1 | 3'UTR                 | SNP | 37 |
| 2 | LRP5     | uc001ont.3 | Missense_Mutation     | SNP | 37 |
| 2 | DVL2     | uc002gez.1 | Silent                | SNP | 37 |
| 2 | PCDHB1   | uc003lik.1 | Missense_Mutation     | SNP | 37 |
| 2 | THRB     | uc003cda.1 | Nonsense_Mutation     | SNP | 37 |
| 2 | PRUNE2   | uc010mpk.3 | Missense_Mutation     | SNP | 37 |
| 2 | PLXNA2   | uc001hgz.3 | Missense_Mutation     | SNP | 37 |
| 2 | ABCC9    | uc001rfh.3 | 3'UTR                 | SNP | 37 |
| 2 | MARCH11  | uc003jfo.2 | Missense_Mutation     | SNP | 37 |
| 2 | ADAM21   | uc001xmd.3 | Nonsense_Mutation     | SNP | 37 |
| 2 | KLK7     | uc002puo.3 | Missense_Mutation     | SNP | 37 |
| 2 | STAG3    | uc003utx.1 | Missense_Mutation     | SNP | 37 |
| 2 | MTR      | uc001hyi.4 | Splice_Site           | SNP | 37 |
| 2 | CDCP1    | uc003com.3 | Missense_Mutation     | SNP | 37 |
| 2 | ZNF230   | uc002oyb.1 | Missense_Mutation     | SNP | 37 |
| 2 | KIAA0195 | uc010wsa.2 | Missense_Mutation     | SNP | 37 |
| 2 | RACGAP1P | uc001rol.3 | Non-coding_Transcript | SNP | 37 |
| 2 | THBS1    | uc001zkh.3 | Missense_Mutation     | SNP | 37 |
| 2 | MYH6     | uc001wju.3 | Missense_Mutation     | SNP | 37 |
| 2 | GRB10    | uc003tpi.2 | Silent                | SNP | 37 |



|   |               |            |                       |     |    |
|---|---------------|------------|-----------------------|-----|----|
| 2 | MTMR7         | uc003wxm.3 | Silent                | SNP | 37 |
| 2 | FAM19A4       | uc021xag.1 | Missense_Mutation     | SNP | 37 |
| 2 | BLNK          | uc001kls.4 | Missense_Mutation     | SNP | 37 |
| 2 | NRXN1         | uc010fbp.3 | Silent                | SNP | 37 |
| 2 | CHD1          | uc003knf.3 | Missense_Mutation     | SNP | 37 |
| 2 | FCRL3         | uc001fqz.4 | Missense_Mutation     | SNP | 37 |
| 2 | PIKFYVE       | uc002vcz.3 | Missense_Mutation     | SNP | 37 |
| 2 | ANK3          | uc001jky.3 | Nonsense_Mutation     | SNP | 37 |
| 2 | SETBP1        | uc010dni.3 | Missense_Mutation     | SNP | 37 |
| 2 | ATP6V0A1      | uc002hzs.3 | Silent                | SNP | 37 |
| 2 | TELO2         | uc002cly.3 | Missense_Mutation     | SNP | 37 |
| 2 | C3orf39       | uc003cmq.1 | Silent                | SNP | 37 |
| 2 | MECOM         | uc011bpj.1 | Nonsense_Mutation     | SNP | 37 |
| 2 | MBL2          | uc001jtt.3 | Silent                | SNP | 37 |
| 2 | TGFBI         | uc003lbf.4 | Silent                | SNP | 37 |
| 2 | WWP1          | uc003ydt.3 | Nonsense_Mutation     | SNP | 37 |
| 2 | CWC22         | uc010frh.1 | Splice_Site           | SNP | 37 |
| 2 | FES           | uc002bvp.3 | Missense_Mutation     | SNP | 37 |
| 2 | ANKRD20A9P    | uc010tcj.1 | Non-coding_Transcript | SNP | 37 |
| 2 | ANKFN1        | uc002iun.1 | Silent                | SNP | 37 |
| 2 | GIMAP1-GIMAP5 | uc003whq.3 | Missense_Mutation     | SNP | 37 |
| 2 | ATRIP         | uc003ctf.1 | 3'UTR                 | SNP | 37 |
| 2 | HIPK3         | uc001mul.1 | Missense_Mutation     | SNP | 37 |
| 2 | GABRA3        | uc010ntk.1 | Nonsense_Mutation     | SNP | 37 |
| 2 | AK302514      | uc011dxv.2 | 5'UTR                 | SNP | 37 |
| 2 | OR1F2P        | uc010uuv.2 | Missense_Mutation     | SNP | 37 |
| 2 | STH           | uc002ijy.2 | Nonsense_Mutation     | SNP | 37 |
| 2 | SPTBN2        | uc001ojd.3 | Missense_Mutation     | SNP | 37 |
| 2 | SYCP1         | uc001efr.3 | 3'UTR                 | SNP | 37 |
| 2 | SH3GL1        | uc002maj.3 | Silent                | SNP | 37 |
| 2 | ADAMTS18      | uc002ffc.4 | Missense_Mutation     | SNP | 37 |
| 2 | PSG9          | uc002owd.4 | 3'UTR                 | SNP | 37 |
| 2 | ADCY1         | uc003tne.4 | Missense_Mutation     | SNP | 37 |
| 2 | LAMA4         | uc003pvu.2 | Missense_Mutation     | SNP | 37 |
| 2 | EPPK1         | uc003zaa.1 | Missense_Mutation     | SNP | 37 |
| 2 | PRDM9         | uc003jgo.3 | Missense_Mutation     | SNP | 37 |
| 2 | SIGLEC8       | uc002pwt.3 | Missense_Mutation     | SNP | 37 |
| 2 | SCML2         | uc004cyl.2 | 3'UTR                 | SNP | 37 |
| 2 | PSG2          | uc002ovr.3 | Missense_Mutation     | SNP | 37 |
| 2 | FMO3          | uc001ghi.3 | 3'UTR                 | SNP | 37 |
| 2 | P2RX1         | uc002fww.3 | Missense_Mutation     | SNP | 37 |
| 2 | TCEB3B        | uc002lcr.1 | Missense_Mutation     | SNP | 37 |
| 2 | KRTAP10-5     | uc002zfl.1 | 3'UTR                 | SNP | 37 |

|   |           |            |                       |     |    |
|---|-----------|------------|-----------------------|-----|----|
| 2 | RALBP1    | uc002kob.3 | Missense_Mutation     | SNP | 37 |
| 2 | RIPPLY2   | uc003pke.3 | Missense_Mutation     | SNP | 37 |
| 2 | LOC643387 | uc010znu.2 | Missense_Mutation     | SNP | 37 |
| 2 | EIF2AK2   | uc010ynh.2 | Missense_Mutation     | SNP | 37 |
| 2 | LCE3E     | uc001faa.3 | 3'UTR                 | SNP | 37 |
| 2 | AATF      | uc002hni.3 | 3'UTR                 | SNP | 37 |
| 2 | LCT       | uc002tuu.1 | Missense_Mutation     | SNP | 37 |
| 2 | LCAT      | uc002euy.1 | Missense_Mutation     | SNP | 37 |
| 2 | PIGC      | uc001gin.3 | Silent                | SNP | 37 |
| 2 | ELFN2     | uc003asq.4 | Silent                | SNP | 37 |
| 2 | CCDC142   | uc002slr.3 | 5'UTR                 | SNP | 37 |
| 2 | CHSY3     | uc003kvd.3 | Missense_Mutation     | SNP | 37 |
| 2 | RAB23     | uc003pds.3 | Silent                | SNP | 37 |
| 2 | TDRKH     | uc009wnb.1 | Missense_Mutation     | SNP | 37 |
| 2 | POF1B     | uc004ees.3 | Missense_Mutation     | SNP | 37 |
| 2 | IFT52     | uc002xkw.3 | Missense_Mutation     | SNP | 37 |
| 2 | Unknown   |            | IGR                   | SNP | 37 |
| 2 | KLK9      | uc002pux.1 | Missense_Mutation     | SNP | 37 |
| 2 | KRTAP4-2  | uc002hwd.3 | Missense_Mutation     | SNP | 37 |
| 2 | XYLT1     | uc002dfa.3 | Missense_Mutation     | SNP | 37 |
| 2 | CXADRP3   | uc010xai.2 | Non-coding_Transcript | SNP | 37 |
| 2 | CXorf22   | uc004ddj.3 | Silent                | SNP | 37 |
| 2 | NRCAM     | uc022aka.1 | Intron                | SNP | 37 |
| 2 | KIAA0284  | uc001yps.3 | Missense_Mutation     | SNP | 37 |
| 2 | PTPRN2    | uc011kwa.2 | Missense_Mutation     | SNP | 37 |
| 2 | RASGRF2   | uc003kvb.1 | Silent                | SNP | 37 |
| 2 | C14orf159 | uc001xyw.2 | Silent                | SNP | 37 |
| 2 | TRIO      | uc003jff.3 | Missense_Mutation     | SNP | 37 |
| 2 | PSMD8     | uc002oii.4 | 5'UTR                 | SNP | 37 |
| 2 | UBE2K     | uc003guu.4 | Silent                | SNP | 37 |
| 2 | OCM       | uc003spe.4 | 3'UTR                 | SNP | 37 |
| 2 | NLK       | uc010crj.3 | Missense_Mutation     | SNP | 37 |
| 2 | PKHD1L1   | uc003yne.3 | Missense_Mutation     | SNP | 37 |
| 2 | PSKH1     | uc002euv.3 | Missense_Mutation     | SNP | 37 |
| 2 | GRIA3     | uc004etq.4 | Missense_Mutation     | SNP | 37 |
| 2 | C15orf54  | uc001zkg.2 | 3'UTR                 | SNP | 37 |
| 2 | ATP1A4    | uc001fve.4 | Silent                | SNP | 37 |
| 2 | PREX1     | uc002xtw.1 | Missense_Mutation     | SNP | 37 |
| 2 | PIGO      | uc003zwd.3 | Missense_Mutation     | SNP | 37 |
| 2 | GTF3C2    | uc002rju.1 | Missense_Mutation     | SNP | 37 |
| 2 | CEACAM20  | uc010ejn.1 | Silent                | SNP | 37 |
| 2 | DNAJC10   | uc002uow.1 | Silent                | SNP | 37 |
| 2 | WRAP53    | uc010vuh.2 | Missense_Mutation     | SNP | 37 |

|   |           |            |                       |     |    |
|---|-----------|------------|-----------------------|-----|----|
| 2 | HMCN1     | uc001grr.1 | 3'UTR                 | SNP | 37 |
| 2 | BZRAP1    | uc002ivx.4 | Silent                | SNP | 37 |
| 2 | DNAH7     | uc002utj.4 | Nonsense_Mutation     | SNP | 37 |
| 2 | GSTZ1     | uc001xtj.3 | Silent                | SNP | 37 |
| 2 | C5orf22   | uc003jhj.4 | Missense_Mutation     | SNP | 37 |
| 2 | LPO       | uc002ivt.3 | Missense_Mutation     | SNP | 37 |
| 2 | LDB3      | uc010qmm.2 | Missense_Mutation     | SNP | 37 |
| 2 | DENND2A   | uc003vvx.3 | 3'UTR                 | SNP | 37 |
| 2 | SCN11A    | uc021wvy.1 | Silent                | SNP | 37 |
| 2 | PSD       | uc001kvg.1 | Missense_Mutation     | SNP | 37 |
| 2 | ADH1C     | uc021xqi.1 | Splice_Site           | SNP | 37 |
| 2 | FRG1B     | uc010ztl.1 | Silent                | SNP | 37 |
| 2 | SLITRK4   | uc022cfl.1 | Missense_Mutation     | SNP | 37 |
| 2 | PRSS50    | uc021wx.1  | Missense_Mutation     | SNP | 37 |
| 2 | C11orf30  | uc010rsb.2 | Missense_Mutation     | SNP | 37 |
| 2 | GBE1      | uc021xav.1 | Missense_Mutation     | SNP | 37 |
| 2 | C3orf20   | uc003byx.2 | Nonsense_Mutation     | SNP | 37 |
| 2 | POM121    | uc003twk.2 | Silent                | SNP | 37 |
| 2 | SPTA1     | uc001fst.1 | Missense_Mutation     | SNP | 37 |
| 2 | CUBN      | uc001ioo.3 | Missense_Mutation     | SNP | 37 |
| 2 | LILRB1    | uc002qgm.3 | Silent                | SNP | 37 |
| 2 | SYT14     | uc001hhs.4 | Silent                | SNP | 37 |
| 2 | ATP6V1A   | uc003eao.3 | Missense_Mutation     | SNP | 37 |
| 2 | KRT38     | uc002hwq.1 | Silent                | SNP | 37 |
| 2 | SPAG11B   | uc003wrx.3 | Missense_Mutation     | SNP | 37 |
| 2 | RYR2      | uc001hyl.1 | Splice_Site           | SNP | 37 |
| 2 | C14orf101 | uc001xcm.3 | Missense_Mutation     | SNP | 37 |
| 2 | TRIO      | uc003jff.3 | Silent                | SNP | 37 |
| 2 | DPF2      | uc001odm.3 | Silent                | SNP | 37 |
| 2 | SLC22A8   | uc009yon.3 | Silent                | SNP | 37 |
| 2 | ALS2CL    | uc003cqa.2 | Missense_Mutation     | SNP | 37 |
| 2 | AAK1      | uc002sfp.2 | Missense_Mutation     | SNP | 37 |
| 2 | DNAH5     | uc003jfd.2 | Silent                | SNP | 37 |
| 2 | TESPA1    | uc001sgn.3 | Silent                | SNP | 37 |
| 2 | CORIN     | uc003gxm.3 | Silent                | SNP | 37 |
| 2 | CDK11B    | uc009vks.3 | Missense_Mutation     | SNP | 37 |
| 2 | LOC494141 | uc009yhh.3 | Non-coding_Transcript | SNP | 37 |
| 2 | F5        | uc001ggg.1 | Missense_Mutation     | SNP | 37 |
| 2 | TMPRSS9   | uc010xgx.2 | Silent                | SNP | 37 |
| 2 | C20orf160 | uc002wxf.2 | Silent                | SNP | 37 |
| 2 | GDF10     | uc001jfb.3 | 5'UTR                 | SNP | 37 |
| 2 | PSKH1     | uc002euv.3 | Silent                | SNP | 37 |
| 2 | IL18      | uc001pnb.2 | Missense_Mutation     | SNP | 37 |

|   |          |            |                   |     |    |
|---|----------|------------|-------------------|-----|----|
| 2 | SLC39A12 | uc001ipo.2 | 3'UTR             | SNP | 37 |
| 2 | CACNB2   | uc001iqa.2 | Missense_Mutation | SNP | 37 |
| 2 | NCAPG    | uc003gpp.3 | Missense_Mutation | SNP | 37 |
| 2 | CASC5    | uc010bbs.1 | Missense_Mutation | SNP | 37 |
| 2 | FAM81A   | uc002agc.2 | Missense_Mutation | SNP | 37 |
| 2 | IGHE     | uc001yrw.1 | Missense_Mutation | SNP | 37 |
| 2 | OR2M3    | uc010pzg.2 | Missense_Mutation | SNP | 37 |
| 2 | PIK3AP1  | uc001kmq.3 | Splice_Site       | SNP | 37 |
| 2 | JAK2     | uc010mhm.3 | Silent            | SNP | 37 |
| 2 | ACSBG1   | uc002bdh.3 | Missense_Mutation | SNP | 37 |
| 2 | PTPRJ    | uc001ngp.4 | Nonsense_Mutation | SNP | 37 |
| 2 | EML1     | uc001ygr.3 | Silent            | SNP | 37 |
| 2 | DSP      | uc003mxp.1 | Missense_Mutation | SNP | 37 |
| 2 | PHKA1    | uc004eax.4 | Silent            | SNP | 37 |
| 2 | ZFP1     | uc002fdo.3 | Missense_Mutation | SNP | 37 |
| 2 | TSKU     | uc001oxt.3 | Silent            | SNP | 37 |
| 2 | KBTBD5   | uc003clv.1 | Missense_Mutation | SNP | 37 |
| 2 | CAMK4    | uc003kpf.3 | Silent            | SNP | 37 |
| 2 | PCDHAC2  | uc003lif.2 | Missense_Mutation | SNP | 37 |
| 2 | GNPTG    | uc002clm.3 | Missense_Mutation | SNP | 37 |
| 2 | CA6      | uc001apm.3 | Missense_Mutation | SNP | 37 |
| 2 | STOX2    | uc003ivz.1 | Missense_Mutation | SNP | 37 |
| 2 | CECR5    | uc002zmf.3 | Silent            | SNP | 37 |
| 2 | CXCR3    | uc011mpx.2 | Silent            | SNP | 37 |
| 2 | AFAP1L2  | uc010qse.2 | Silent            | SNP | 37 |
| 2 | SLC6A7   | uc003lrr.3 | Missense_Mutation | SNP | 37 |
| 2 | ACE      | uc002jau.2 | Missense_Mutation | SNP | 37 |
| 2 | FES      | uc002bpv.3 | Silent            | SNP | 37 |
| 2 | HEATR1   | uc001hyd.2 | Silent            | SNP | 37 |
| 2 | IFT140   | uc002cmb.3 | Silent            | SNP | 37 |
| 2 | A1CF     | uc010qho.2 | Missense_Mutation | SNP | 37 |
| 2 | SLIT2    | uc003gpr.1 | Missense_Mutation | SNP | 37 |
| 2 | RBM14    | uc001oit.3 | Missense_Mutation | SNP | 37 |
| 2 | GPR17    | uc010yzn.2 | Missense_Mutation | SNP | 37 |
| 2 | LILRP2   | uc002qgt.1 | Intron            | SNP | 37 |
| 2 | ARNT2    | uc002bfr.3 | Missense_Mutation | SNP | 37 |
| 2 | PAPPA2   | uc001gkz.3 | Missense_Mutation | SNP | 37 |
| 2 | TRPC4    | uc010abx.3 | Missense_Mutation | SNP | 37 |
| 2 | HMGCS2   | uc001eid.3 | Missense_Mutation | SNP | 37 |
| 2 | INCENP   | uc001nsw.1 | Missense_Mutation | SNP | 37 |
| 2 | STRBP    | uc004bns.3 | Missense_Mutation | SNP | 37 |
| 2 | LCAT     | uc002euy.1 | Silent            | SNP | 37 |
| 2 | CHAF1A   | uc002mal.3 | Missense_Mutation | SNP | 37 |

|   |              |            |                   |     |    |
|---|--------------|------------|-------------------|-----|----|
| 2 | PRR5-ARHGAP8 | uc003bfh.1 | 5'UTR             | SNP | 37 |
| 2 | MGAM         | uc003vwy.3 | Missense_Mutation | SNP | 37 |
| 2 | POLQ         | uc003eee.4 | Missense_Mutation | SNP | 37 |
| 2 | XDH          | uc002rvn.1 | Missense_Mutation | SNP | 37 |
| 2 | MUC3A        | uc003uxl.1 | Missense_Mutation | SNP | 37 |
| 2 | ADAMTS18     | uc002ffc.4 | Missense_Mutation | SNP | 37 |
| 2 | HSD3B2       | uc001ehs.3 | Silent            | SNP | 37 |
| 2 | MCTP2        | uc002btj.3 | Silent            | SNP | 37 |
| 2 | VPS39        | uc001zpd.3 | Missense_Mutation | SNP | 37 |
| 2 | LRMP         | uc001rgh.3 | Missense_Mutation | SNP | 37 |
| 2 | PTENP1       | uc003zth.4 | Missense_Mutation | SNP | 37 |
| 2 | COL7A1       | uc003ctz.2 | Missense_Mutation | SNP | 37 |
| 2 | SVEP1        | uc010mtz.3 | Silent            | SNP | 37 |
| 2 | DENND1A      | uc011lzm.1 | Missense_Mutation | SNP | 37 |
| 2 | PRAMEF6      | uc001auq.2 | Missense_Mutation | SNP | 37 |
| 2 | MCPH1        | uc003wqi.3 | Missense_Mutation | SNP | 37 |
| 2 | OR4S1        | uc010rhu.2 | Missense_Mutation | SNP | 37 |
| 2 | IGSF22       | uc009yht.2 | Silent            | SNP | 37 |
| 2 | WIPF1        | uc010fqt.1 | Silent            | SNP | 37 |
| 2 | TPRXL        | uc011avd.2 | 3'UTR             | SNP | 37 |
| 2 | TENC1        | uc001sbn.3 | Missense_Mutation | SNP | 37 |
| 2 | PLA2G4D      | uc001zox.3 | 5'UTR             | SNP | 37 |
| 2 | CNTNAP3B     | uc004ada.2 | Silent            | SNP | 37 |
| 2 | C14orf43     | uc010tud.1 | Silent            | SNP | 37 |
| 2 | PDE8B        | uc003kfa.3 | Silent            | SNP | 37 |
| 2 | INTS1        | uc003skn.2 | Missense_Mutation | SNP | 37 |
| 2 | FTX          | uc010nlq.1 | Intron            | SNP | 37 |
| 2 | MSTO1        | uc001fky.3 | Missense_Mutation | SNP | 37 |
| 2 | INO80D       | uc002vaz.4 | Silent            | SNP | 37 |
| 2 | CDK13        | uc003thh.4 | Missense_Mutation | SNP | 37 |
| 2 | NFIC         | uc010xhi.2 | Splice_Site       | SNP | 37 |
| 2 | SYT1         | uc001sys.3 | Nonsense_Mutation | SNP | 37 |
| 2 | TXLNB        | uc021zfy.1 | Silent            | SNP | 37 |
| 2 | STMN4        | uc003xfj.3 | Silent            | SNP | 37 |
| 2 | SNX27        | uc001eyn.1 | 3'UTR             | SNP | 37 |
| 2 | ITIH3        | uc003dfv.2 | Silent            | SNP | 37 |
| 2 | NRXN1        | uc021vhg.1 | Missense_Mutation | SNP | 37 |
| 2 | ZKSCAN1      | uc003usk.1 | Silent            | SNP | 37 |
| 2 | DLX1         | uc002uhl.3 | 3'UTR             | SNP | 37 |
| 2 | AIP          | uc001olv.3 | Silent            | SNP | 37 |
| 2 | ANKRD30A     | uc021ppc.1 | Missense_Mutation | SNP | 37 |
| 2 | NUP214       | uc004cag.3 | Silent            | SNP | 37 |
| 2 | DEPTOR       | uc003yow.4 | Silent            | SNP | 37 |

|   |           |            |                       |     |    |
|---|-----------|------------|-----------------------|-----|----|
| 2 | MCF2L2    | uc003fli.1 | Missense_Mutation     | SNP | 37 |
| 2 | LOC146880 | uc002jeu.3 | 3'UTR                 | SNP | 37 |
| 2 | ABCA7     | uc002lqw.4 | Silent                | SNP | 37 |
| 2 | DHX38     | uc002fcb.3 | Silent                | SNP | 37 |
| 2 | TRIM38    | uc003nfm.3 | Silent                | SNP | 37 |
| 2 | CPN1      | uc001kql.2 | Silent                | SNP | 37 |
| 2 | BC024248  | uc002snv.4 | Non-coding_Transcript | SNP | 37 |
| 2 | SYBU      | uc003ynj.4 | 3'UTR                 | SNP | 37 |
| 2 | ATP6V1D   | uc001xjf.3 | 5'UTR                 | SNP | 37 |
| 2 | MUC3A     | uc003uxl.1 | Missense_Mutation     | SNP | 37 |
| 2 | SLC9B1    | uc003hww.3 | Silent                | SNP | 37 |
| 2 | DNAH3     | uc010vbe.2 | Silent                | SNP | 37 |
| 2 | GLT8D1    | uc003dfi.4 | Missense_Mutation     | SNP | 37 |
| 2 | KRTAP5-10 | uc001oqt.1 | Missense_Mutation     | SNP | 37 |
| 2 | MGAM      | uc003vwy.3 | Silent                | SNP | 37 |
| 2 | PBX1      | uc001gct.3 | Missense_Mutation     | SNP | 37 |
| 2 | DAB2IP    | uc004bln.3 | Missense_Mutation     | SNP | 37 |
| 2 | OR51S1    | uc010qyo.2 | Silent                | SNP | 37 |
| 2 | PDE1B     | uc001sgd.2 | Missense_Mutation     | SNP | 37 |
| 2 | BCL2L12   | uc002ppa.3 | Missense_Mutation     | SNP | 37 |
| 2 | TTN       | uc021vsy.1 | Missense_Mutation     | SNP | 37 |
| 2 | SLC6A20   | uc011bai.2 | Missense_Mutation     | SNP | 37 |
| 2 | CELSR3    | uc003cuf.1 | Missense_Mutation     | SNP | 37 |
| 2 | LRP2      | uc002ues.3 | Silent                | SNP | 37 |
| 2 | LMBR1     | uc010lqn.3 | Missense_Mutation     | SNP | 37 |
| 2 | SALL3     | uc002lmt.3 | Missense_Mutation     | SNP | 37 |
| 2 | RIPK1     | uc010jni.3 | Nonsense_Mutation     | SNP | 37 |
| 2 | NRK       | uc004emd.3 | Missense_Mutation     | SNP | 37 |
| 2 | KCTD16    | uc003lnm.1 | Missense_Mutation     | SNP | 37 |
| 2 | TTN       | uc021vsy.1 | Missense_Mutation     | SNP | 37 |
| 2 | APT_X     | uc003zry.3 | Missense_Mutation     | SNP | 37 |
| 2 | CDH11     | uc002eoi.3 | Nonsense_Mutation     | SNP | 37 |
| 2 | UTS2D     | uc003fsu.3 | Silent                | SNP | 37 |
| 2 | SPTAN1    | uc004bvm.4 | Missense_Mutation     | SNP | 37 |
| 2 | SGK223    | uc003wsh.4 | Silent                | SNP | 37 |
| 2 | GPC3      | uc010nrn.2 | Silent                | SNP | 37 |
| 2 | PLEKHA7   | uc010rcu.1 | Silent                | SNP | 37 |
| 2 | CTSK      | uc001evp.2 | Nonsense_Mutation     | SNP | 37 |
| 2 | SRP54     | uc001wso.3 | 5'UTR                 | SNP | 37 |
| 2 | C2orf71   | uc002rmt.2 | Nonsense_Mutation     | SNP | 37 |
| 2 | OR1Q1     | uc011lyy.2 | Silent                | SNP | 37 |
| 2 | IQCA1     | uc002vwb.2 | Missense_Mutation     | SNP | 37 |
| 2 | EPHB6     | uc011kst.2 | 3'UTR                 | SNP | 37 |

|   |           |            |                       |     |    |
|---|-----------|------------|-----------------------|-----|----|
| 2 | COL5A1    | uc004cfe.3 | 3'UTR                 | SNP | 37 |
| 2 | BC070322  | uc004afu.3 | Non-coding_Transcript | SNP | 37 |
| 2 | CAPN10    | uc002vzk.2 | Missense_Mutation     | SNP | 37 |
| 2 | PGM1      | uc010ooz.2 | Missense_Mutation     | SNP | 37 |
| 2 | SDHAP2    | uc011btb.1 | Missense_Mutation     | SNP | 37 |
| 2 | GLDN      | uc002aba.3 | Missense_Mutation     | SNP | 37 |
| 2 | SLC12A4   | uc010vkj.1 | Missense_Mutation     | SNP | 37 |
| 2 | BDP1      | uc003kbp.1 | Missense_Mutation     | SNP | 37 |
| 2 | OLFML2B   | uc010pkq.2 | Silent                | SNP | 37 |
| 2 | ZNF462    | uc004bcz.3 | Silent                | SNP | 37 |
| 2 | ZFYVE26   | uc001xka.2 | Silent                | SNP | 37 |
| 2 | GPHB5     | uc021rud.1 | Missense_Mutation     | SNP | 37 |
| 2 | OR52W1    | uc010qzz.2 | Missense_Mutation     | SNP | 37 |
| 2 | FAT3      | uc001pdj.4 | Missense_Mutation     | SNP | 37 |
| 2 | OR51B6    | uc010qzb.2 | Silent                | SNP | 37 |
| 2 | NAA15     | uc003ihu.1 | Missense_Mutation     | SNP | 37 |
| 2 | OR2W3     | uc001idp.1 | Missense_Mutation     | SNP | 37 |
| 2 | NUDCD2    | uc003lze.3 | 3'UTR                 | SNP | 37 |
| 2 | TMEM145   | uc002otk.1 | Missense_Mutation     | SNP | 37 |
| 2 | SYTL4     | uc004egd.4 | Missense_Mutation     | SNP | 37 |
| 2 | AV4S1     | uc021rpv.1 | 5'UTR                 | SNP | 37 |
| 2 | RHBDL3    | uc010csx.1 | Missense_Mutation     | SNP | 37 |
| 2 | CASR      | uc003eew.4 | Missense_Mutation     | SNP | 37 |
| 2 | BACH1     | uc002ynl.2 | Non-coding_Transcript | SNP | 37 |
| 2 | ZNF507    | uc002nte.3 | Missense_Mutation     | SNP | 37 |
| 2 | LAG3      | uc001qqt.4 | 5'UTR                 | SNP | 37 |
| 2 | MTERFD1   | uc003yhs.1 | Silent                | SNP | 37 |
| 2 | AMY2A     | uc010ouq.1 | 3'UTR                 | SNP | 37 |
| 2 | EEA1      | uc001tck.3 | Silent                | SNP | 37 |
| 2 | WNT9A     | uc001hri.2 | Missense_Mutation     | SNP | 37 |
| 2 | FTSJ2     | uc003slm.3 | 5'Flank               | SNP | 37 |
| 2 | A2ML1     | uc001quz.4 | Silent                | SNP | 37 |
| 2 | C15orf33  | uc001zxl.2 | Missense_Mutation     | SNP | 37 |
| 2 | DENND1B   | uc021pgv.1 | Missense_Mutation     | SNP | 37 |
| 2 | DSG4      | uc002kwr.2 | Missense_Mutation     | SNP | 37 |
| 2 | TRA       | uc021rpa.1 | Intron                | SNP | 37 |
| 2 | NARS      | uc002lgs.2 | Missense_Mutation     | SNP | 37 |
| 2 | SZT2      | uc001cjk.2 | 3'UTR                 | SNP | 37 |
| 2 | CPAMD8    | uc002nfb.3 | Silent                | SNP | 37 |
| 2 | MUC4      | uc021xjp.1 | Silent                | SNP | 37 |
| 2 | LINC00478 | uc002ykb.2 | Intron                | SNP | 37 |
| 2 | HEATR7B2  | uc003jnj.4 | Missense_Mutation     | SNP | 37 |
| 2 | TCEB3B    | uc002lcr.1 | Missense_Mutation     | SNP | 37 |

|   |             |            |                       |     |    |
|---|-------------|------------|-----------------------|-----|----|
| 2 | MYBPC2      | uc002psf.2 | Silent                | SNP | 37 |
| 2 | ANKRD35     | uc001eob.1 | Missense_Mutation     | SNP | 37 |
| 2 | SHPK        | uc002fvz.1 | Missense_Mutation     | SNP | 37 |
| 2 | SPTB        | uc001xhr.3 | Silent                | SNP | 37 |
| 2 | PTPRD       | uc003zkk.3 | Missense_Mutation     | SNP | 37 |
| 2 | ODZ2        | uc010jld.3 | Silent                | SNP | 37 |
| 2 | OR2F2       | uc011ktv.2 | Silent                | SNP | 37 |
| 2 | SNORD114-11 | uc001yjb.3 | Splice_Site           | SNP | 37 |
| 2 | SDK1        | uc003smy.3 | 5'UTR                 | SNP | 37 |
| 2 | KIAA1432    | uc003zjl.4 | Silent                | SNP | 37 |
| 2 | C5          | uc004bkv.3 | Missense_Mutation     | SNP | 37 |
| 2 | CEACAM18    | uc002pww.1 | Missense_Mutation     | SNP | 37 |
| 2 | CCDC71      | uc003cwg.4 | Missense_Mutation     | SNP | 37 |
| 2 | CHAT        | uc001jhz.2 | Missense_Mutation     | SNP | 37 |
| 2 | PITPNM3     | uc002gdd.4 | Missense_Mutation     | SNP | 37 |
| 2 | FGL1        | uc003wye.3 | Missense_Mutation     | SNP | 37 |
| 2 | USH2A       | uc001hku.1 | Missense_Mutation     | SNP | 37 |
| 2 | UROC1       | uc010hsi.2 | Silent                | SNP | 37 |
| 2 | FAM133A     | uc022bzw.1 | Nonsense_Mutation     | SNP | 37 |
| 2 | PLAG1       | uc003xsq.4 | Silent                | SNP | 37 |
| 2 | PARM1       | uc003hih.2 | Missense_Mutation     | SNP | 37 |
| 2 | SALL4       | uc002xwh.4 | Silent                | SNP | 37 |
| 2 | SPATA16     | uc003fin.4 | Missense_Mutation     | SNP | 37 |
| 2 | SCN5A       | uc021wvo.1 | Silent                | SNP | 37 |
| 2 | FLJ38723    | uc002ajj.1 | Missense_Mutation     | SNP | 37 |
| 2 | UBASH3A     | uc002zbe.3 | Intron                | SNP | 37 |
| 2 | ACSM1       | uc002dhm.1 | Missense_Mutation     | SNP | 37 |
| 2 | BC018860    | uc011mfh.2 | 5'UTR                 | SNP | 37 |
| 2 | DMBT1       | uc001lgl.1 | Missense_Mutation     | SNP | 37 |
| 2 | PRDM9       | uc003jgo.3 | 5'UTR                 | SNP | 37 |
| 2 | ZNF354A     | uc003mjj.3 | Missense_Mutation     | SNP | 37 |
| 2 | ZNF833P     | uc002msl.4 | Non-coding_Transcript | SNP | 37 |
| 2 | LYPLA1      | uc003xry.3 | Missense_Mutation     | SNP | 37 |
| 2 | NRG3        | uc021pvc.1 | Silent                | SNP | 37 |
| 2 | ZNF669      | uc001ice.2 | Missense_Mutation     | SNP | 37 |
| 2 | KCNJ10      | uc001fuw.2 | Missense_Mutation     | SNP | 37 |
| 2 | ABCA6       | uc002jhw.1 | Intron                | SNP | 37 |
| 2 | JPH1        | uc003yae.3 | Missense_Mutation     | SNP | 37 |
| 2 | FAM184A     | uc003pyj.3 | Nonsense_Mutation     | SNP | 37 |
| 2 | C22orf31    | uc003aej.1 | Silent                | SNP | 37 |
| 2 | MYH11       | uc010bv.3  | 3'UTR                 | SNP | 37 |
| 2 | CSTA        | uc003eex.3 | Silent                | SNP | 37 |
| 2 | CLCN1       | uc003wcr.1 | Missense_Mutation     | SNP | 37 |



|   |          |            |                   |     |    |
|---|----------|------------|-------------------|-----|----|
| 2 | ACOX2    | uc003dkl.3 | Missense_Mutation | SNP | 37 |
| 2 | SLC7A2   | uc011kye.2 | Missense_Mutation | SNP | 37 |
| 2 | COL1A2   | uc003ung.1 | Missense_Mutation | SNP | 37 |
| 2 | ZNF418   | uc002qqs.1 | Missense_Mutation | SNP | 37 |
| 2 | SNX11    | uc002inf.1 | Silent            | SNP | 37 |
| 2 | IDO1     | uc003xnm.3 | Silent            | SNP | 37 |
| 2 | SOX6     | uc001mme.3 | Splice_Site       | SNP | 37 |
| 2 | MMP26    | uc001lzv.3 | Silent            | SNP | 37 |
| 2 | CASQ1    | uc010pja.2 | 3'UTR             | SNP | 37 |
| 2 | SULT1C2  | uc010ywg.2 | Missense_Mutation | SNP | 37 |
| 2 | STH      | uc002ijy.2 | 5'UTR             | SNP | 37 |
| 2 | SGPL1    | uc001jrm.3 | Missense_Mutation | SNP | 37 |
| 2 | TRIP11   | uc001xzy.3 | Silent            | SNP | 37 |
| 2 | FGD5     | uc003bzc.3 | Missense_Mutation | SNP | 37 |
| 2 | EDIL3    | uc003kio.1 | 3'UTR             | SNP | 37 |
| 2 | C14orf45 | uc010tup.2 | 3'UTR             | SNP | 37 |
| 2 | PATL1    | uc001noe.4 | Splice_Site       | SNP | 37 |
| 2 | IGSF3    | uc001egs.1 | Missense_Mutation | SNP | 37 |
| 2 | KBTBD6   | uc001uxu.1 | Missense_Mutation | SNP | 37 |
| 2 | PLAUR    | uc002oxf.2 | Missense_Mutation | SNP | 37 |
| 2 | DKK2     | uc003hyi.3 | Nonsense_Mutation | SNP | 37 |
| 2 | C1orf49  | uc001glu.1 | Silent            | SNP | 37 |
| 2 | SLC5A7   | uc002tdv.3 | Missense_Mutation | SNP | 37 |
| 2 | MAP2K6   | uc002jii.3 | 3'UTR             | SNP | 37 |
| 2 | SARS2    | uc010xup.1 | 5'UTR             | SNP | 37 |
| 2 | OR4D2    | uc010wnp.2 | Missense_Mutation | SNP | 37 |
| 2 | PLCL1    | uc010fsp.3 | 3'UTR             | SNP | 37 |
| 2 | SIRT1    | uc001jnd.3 | Silent            | SNP | 37 |
| 2 | OR8H1    | uc010rje.2 | Silent            | SNP | 37 |
| 2 | DNAJB14  | uc003hvm.3 | 3'UTR             | SNP | 37 |
| 2 | SLC6A19  | uc003jbw.4 | Silent            | SNP | 37 |
| 2 | GABRB2   | uc003lys.1 | Silent            | SNP | 37 |
| 2 | TRBV2    | uc011kro.1 | Intron            | SNP | 37 |
| 2 | OR2T6    | uc001iei.1 | Missense_Mutation | SNP | 37 |
| 2 | COL1A2   | uc003ung.1 | Missense_Mutation | SNP | 37 |
| 2 | C2orf63  | uc002ryi.2 | Splice_Site       | SNP | 37 |
| 2 | KIAA0922 | uc010ipp.3 | Silent            | SNP | 37 |
| 2 | ADAMTS7  | uc002bej.4 | 3'UTR             | SNP | 37 |
| 2 | C12orf44 | uc001rzu.4 | 3'UTR             | SNP | 37 |
| 2 | FAM188A  | uc001iod.1 | Missense_Mutation | SNP | 37 |
| 2 | CAPRN1   | uc001mvh.1 | Missense_Mutation | SNP | 37 |
| 2 | OR8A1    | uc010san.2 | Missense_Mutation | SNP | 37 |
| 2 | NAP1L3   | uc004efq.3 | Silent            | SNP | 37 |

|   |          |            |                       |     |    |
|---|----------|------------|-----------------------|-----|----|
| 2 | FCRL3    | uc001frb.3 | 3'UTR                 | SNP | 37 |
| 2 | THSD4    | uc002atb.1 | Silent                | SNP | 37 |
| 2 | EFHB     | uc003cbl.4 | Missense_Mutation     | SNP | 37 |
| 2 | PXDN     | uc002qxa.3 | Silent                | SNP | 37 |
| 2 | KSR2     | uc001two.2 | Silent                | SNP | 37 |
| 2 | SLC38A10 | uc002jzz.1 | Missense_Mutation     | SNP | 37 |
| 2 | NCKAP5L  | uc009zlk.2 | Missense_Mutation     | SNP | 37 |
| 2 | TLN2     | uc002alb.4 | Silent                | SNP | 37 |
| 2 | MITF     | uc003dnz.3 | Missense_Mutation     | SNP | 37 |
| 2 | PTBP2    | uc010otz.1 | Missense_Mutation     | SNP | 37 |
| 2 | DNAH9    | uc002gnd.1 | 3'UTR                 | SNP | 37 |
| 2 | GRIN2B   | uc001rbt.2 | Silent                | SNP | 37 |
| 2 | DEFB118  | uc002wvr.3 | Silent                | SNP | 37 |
| 2 | C1R      | uc010sfy.2 | Missense_Mutation     | SNP | 37 |
| 2 | OTOL1    | uc011bpb.2 | Missense_Mutation     | SNP | 37 |
| 2 | ESPNL    | uc002vxq.4 | Missense_Mutation     | SNP | 37 |
| 2 | SGIP1    | uc001dcr.3 | Splice_Site           | SNP | 37 |
| 2 | PDE3B    | uc001mln.3 | Missense_Mutation     | SNP | 37 |
| 2 | C3       | uc002mfm.3 | Missense_Mutation     | SNP | 37 |
| 2 | KCNK17   | uc003ooo.3 | Silent                | SNP | 37 |
| 2 | IFIT2    | uc009xts.3 | Silent                | SNP | 37 |
| 2 | GALK1    | uc002jpk.3 | Silent                | SNP | 37 |
| 2 | SERINC2  | uc021okm.1 | Missense_Mutation     | SNP | 37 |
| 2 | GPR98    | uc003kju.3 | Missense_Mutation     | SNP | 37 |
| 2 | DNAH1    | uc011bef.2 | Silent                | SNP | 37 |
| 2 | REG1P    | uc002soa.1 | Non-coding_Transcript | SNP | 37 |
| 2 | SIPA1L2  | uc001hvg.3 | Silent                | SNP | 37 |
| 2 | RPS6KC1  | uc010ptr.2 | 3'UTR                 | SNP | 37 |
| 2 | SLC9C1   | uc003dyu.3 | Silent                | SNP | 37 |
| 2 | LGR5     | uc001swl.3 | Missense_Mutation     | SNP | 37 |
| 2 | LTBP2    | uc001xqa.3 | Silent                | SNP | 37 |
| 2 | C18orf26 | uc002lfq.1 | Missense_Mutation     | SNP | 37 |
| 2 | PCIF1    | uc002xqs.3 | Missense_Mutation     | SNP | 37 |
| 2 | CNTNAP5  | uc010flu.3 | Silent                | SNP | 37 |
| 2 | DNAH2    | uc002giu.1 | Nonsense_Mutation     | SNP | 37 |
| 2 | MYO15A   | uc021trm.1 | Missense_Mutation     | SNP | 37 |
| 2 | PAPOLB   | uc003snk.3 | Missense_Mutation     | SNP | 37 |
| 2 | CD86     | uc003eet.3 | Missense_Mutation     | SNP | 37 |
| 2 | ATP10D   | uc003gxx.1 | Missense_Mutation     | SNP | 37 |
| 2 | OR9Q2    | uc010rka.2 | Silent                | SNP | 37 |
| 2 | PDE1B    | uc001sgd.2 | Silent                | SNP | 37 |
| 2 | PCDHB2   | uc003lil.3 | Silent                | SNP | 37 |
| 2 | C15orf32 | uc002brc.1 | Silent                | SNP | 37 |

|   |          |            |                       |     |    |
|---|----------|------------|-----------------------|-----|----|
| 2 | LILRA1   | uc002qgh.1 | Silent                | SNP | 37 |
| 2 | SUMO1    | uc002uyz.1 | Missense_Mutation     | SNP | 37 |
| 2 | FNDC7    | uc001dvx.3 | Missense_Mutation     | SNP | 37 |
| 2 | CLEC16A  | uc021tcy.1 | Missense_Mutation     | SNP | 37 |
| 2 | LUM      | uc001tbm.3 | Missense_Mutation     | SNP | 37 |
| 2 | RPS3     | uc001owh.3 | Intron                | SNP | 37 |
| 2 | TIAM1    | uc002yow.1 | Missense_Mutation     | SNP | 37 |
| 2 | TFPI2    | uc003umy.1 | 3'UTR                 | SNP | 37 |
| 2 | ZNF211   | uc002qpr.2 | Missense_Mutation     | SNP | 37 |
| 2 | C1orf116 | uc001hfd.2 | Missense_Mutation     | SNP | 37 |
| 2 | TBX4     | uc010ddo.3 | Splice_Site           | SNP | 37 |
| 2 | NHLRC2   | uc001lax.2 | Missense_Mutation     | SNP | 37 |
| 2 | MYH4     | uc002gmn.3 | Silent                | SNP | 37 |
| 2 | HIVEP3   | uc001cgz.4 | Missense_Mutation     | SNP | 37 |
| 2 | SPTBN2   | uc001ojd.3 | Nonsense_Mutation     | SNP | 37 |
| 2 | CDH23    | uc001jsi.4 | 5'UTR                 | SNP | 37 |
| 2 | CELSR3   | uc003cuf.1 | Silent                | SNP | 37 |
| 2 | HAGH     | uc002cna.3 | Missense_Mutation     | SNP | 37 |
| 2 | PRPF19   | uc001nqf.3 | Missense_Mutation     | SNP | 37 |
| 2 | RPAP1    | uc001zod.3 | Silent                | SNP | 37 |
| 2 | CARD11   | uc003smv.3 | Silent                | SNP | 37 |
| 2 | GRIN2B   | uc001rbt.2 | 3'UTR                 | SNP | 37 |
| 2 | abParts  | uc021ser.1 | Non-coding_Transcript | SNP | 37 |
| 2 | CAMK4    | uc003kpg.3 | 5'UTR                 | SNP | 37 |
| 2 | MYH11    | uc010bvh.3 | 3'UTR                 | SNP | 37 |
| 2 | LAMA5    | uc002ycq.3 | Missense_Mutation     | SNP | 37 |
| 2 | CDK11B   | uc009vks.3 | Silent                | SNP | 37 |
| 2 | LALBA    | uc001rrt.3 | 3'UTR                 | SNP | 37 |
| 2 | PAPPA2   | uc001gkz.3 | Splice_Site           | SNP | 37 |
| 2 | WDR82    | uc003ddl.2 | Missense_Mutation     | SNP | 37 |
| 2 | TRPC7    | uc003lbn.2 | Silent                | SNP | 37 |
| 2 | POU6F2   | uc003thb.2 | Missense_Mutation     | SNP | 37 |
| 2 | TBC1D20  | uc002wds.3 | Silent                | SNP | 37 |
| 2 | NELL1    | uc009yid.3 | Missense_Mutation     | SNP | 37 |
| 2 | MTA3     | uc002rso.1 | Missense_Mutation     | SNP | 37 |
| 2 | ABCA3    | uc002cpy.1 | Missense_Mutation     | SNP | 37 |
| 2 | DOPEY2   | uc002yvg.3 | Missense_Mutation     | SNP | 37 |
| 2 | SSPO     | uc010lpk.3 | Missense_Mutation     | SNP | 37 |
| 2 | SLC52A3  | uc002wed.4 | Nonsense_Mutation     | SNP | 37 |
| 2 | PTPRB    | uc001swc.4 | 3'UTR                 | SNP | 37 |
| 2 | CCDC88C  | uc010aty.3 | Splice_Site           | SNP | 37 |
| 2 | ADAM28   | uc003xdy.3 | Missense_Mutation     | SNP | 37 |
| 2 | PEG3     | uc002qnu.2 | 5'UTR                 | SNP | 37 |

|   |           |            |                   |     |    |
|---|-----------|------------|-------------------|-----|----|
| 2 | ACAP1     | uc002ggd.2 | 5'UTR             | SNP | 37 |
| 2 | ZNF498    | uc003url.1 | Nonsense_Mutation | SNP | 37 |
| 2 | PNLIPRP3  | uc001lcl.4 | 3'UTR             | SNP | 37 |
| 2 | SLC22A9   | uc001nww.3 | Missense_Mutation | SNP | 37 |
| 2 | SPAG17    | uc001ehk.2 | Nonsense_Mutation | SNP | 37 |
| 2 | COQ7      | uc002dfr.3 | Nonsense_Mutation | SNP | 37 |
| 2 | CSNK1G2   | uc002lul.4 | Silent            | SNP | 37 |
| 2 | HPX       | uc001mdg.2 | 3'UTR             | SNP | 37 |
| 2 | DSCAM     | uc002yyq.1 | Silent            | SNP | 37 |
| 2 | SH3PXD2A  | uc001kxj.1 | Silent            | SNP | 37 |
| 2 | KIF26B    | uc001ibf.1 | Missense_Mutation | SNP | 37 |
| 2 | STAG1     | uc003era.1 | Silent            | SNP | 37 |
| 2 | C12orf40  | uc001rmc.3 | 5'UTR             | SNP | 37 |
| 2 | HDAC6     | uc011mmi.1 | Missense_Mutation | SNP | 37 |
| 2 | NKTR      | uc003clo.3 | Nonsense_Mutation | SNP | 37 |
| 2 | VWC2L     | uc002vet.2 | Missense_Mutation | SNP | 37 |
| 2 | TGM3      | uc002wfx.4 | Missense_Mutation | SNP | 37 |
| 2 | OR51G1    | uc010qyr.2 | Missense_Mutation | SNP | 37 |
| 2 | SEC16A    | uc004chx.3 | Missense_Mutation | SNP | 37 |
| 2 | ZNF444    | uc002qmm.3 | 5'UTR             | SNP | 37 |
| 2 | POTEH     | uc010gqp.2 | Missense_Mutation | SNP | 37 |
| 2 | SPHK1     | uc002jrj.2 | Missense_Mutation | SNP | 37 |
| 2 | C14orf101 | uc001xcm.3 | Silent            | SNP | 37 |
| 2 | MGC39584  | uc003izy.3 | 5'Flank           | SNP | 37 |
| 2 | ASH1L     | uc009wqq.3 | Missense_Mutation | SNP | 37 |
| 2 | NLRP9     | uc002qly.3 | Silent            | SNP | 37 |
| 2 | AMY2B     | uc010ouo.2 | 5'UTR             | SNP | 37 |
| 2 | SLC9A4    | uc002tbz.4 | Missense_Mutation | SNP | 37 |
| 2 | C1orf51   | uc001euh.3 | Missense_Mutation | SNP | 37 |
| 2 | TRIB3     | uc002wdn.3 | Silent            | SNP | 37 |
| 2 | RDH8      | uc002mmr.3 | Silent            | SNP | 37 |
| 2 | NCKAP5L   | uc009zlk.2 | Missense_Mutation | SNP | 37 |
| 2 | FSD2      | uc002bjd.2 | Missense_Mutation | SNP | 37 |
| 2 | MRPS36    | uc003jvq.3 | Nonsense_Mutation | SNP | 37 |
| 2 | ITIH5     | uc021pmv.1 | Missense_Mutation | SNP | 37 |
| 2 | SIM2      | uc002yvr.2 | Silent            | SNP | 37 |
| 2 | GPAM      | uc009xxy.2 | Silent            | SNP | 37 |
| 2 | BPIFA1    | uc002wyt.4 | Missense_Mutation | SNP | 37 |
| 2 | NIPSNAP1  | uc003afx.4 | Silent            | SNP | 37 |
| 2 | FRMPD2    | uc001jgi.3 | Silent            | SNP | 37 |
| 2 | EML1      | uc001ygr.3 | Missense_Mutation | SNP | 37 |
| 2 | SPG7      | uc002fnj.3 | Missense_Mutation | SNP | 37 |
| 2 | PRSS55    | uc003wta.3 | Missense_Mutation | SNP | 37 |

|   |          |            |                   |     |    |
|---|----------|------------|-------------------|-----|----|
| 2 | MARCH1   | uc003iqs.2 | Silent            | SNP | 37 |
| 2 | BAZ2B    | uc002uao.3 | Missense_Mutation | SNP | 37 |
| 2 | PDGFRB   | uc003lro.3 | Silent            | SNP | 37 |
| 2 | ZDHHC5   | uc001nkn.1 | Missense_Mutation | SNP | 37 |
| 2 | PSTPIP1  | uc002bcf.2 | Silent            | SNP | 37 |
| 3 | BLM      | uc002bpr.3 | 3'UTR             | SNP | 37 |
| 3 | C15orf2  | uc001ywo.3 | Silent            | SNP | 37 |
| 3 | NAA10    | uc011mzg.1 | 3'UTR             | SNP | 37 |
| 3 | CNTN2    | uc001hbr.3 | Missense_Mutation | SNP | 37 |
| 3 | TCRVA15  | uc001wbp.2 | Missense_Mutation | SNP | 37 |
| 3 | HSP90AB1 | uc003oxa.1 | 3'UTR             | SNP | 37 |
| 3 | CELSR2   | uc001dxa.4 | Missense_Mutation | SNP | 37 |
| 3 | SLC22A24 | uc021qkp.1 | Nonsense_Mutation | SNP | 37 |
| 3 | SCNN1D   | uc001adt.1 | Nonsense_Mutation | SNP | 37 |
| 3 | CTAGE6P  | uc003wdk.4 | Missense_Mutation | SNP | 37 |
| 3 | GGT5     | uc002zzp.4 | Silent            | SNP | 37 |
| 3 | ZNF404   | uc002oxs.4 | Missense_Mutation | SNP | 37 |
| 3 | GTF3C2   | uc002rju.1 | Missense_Mutation | SNP | 37 |
| 3 | MUC16    | uc002mkp.3 | Silent            | SNP | 37 |
| 3 | OR6C3    | uc010spj.2 | Missense_Mutation | SNP | 37 |
| 3 | RPSA     | uc003cjq.3 | Missense_Mutation | SNP | 37 |
| 3 | CDK14    | uc003uky.2 | Missense_Mutation | SNP | 37 |
| 3 | PIPOX    | uc002hdr.1 | Silent            | SNP | 37 |
| 3 | EPB41L4A | uc003kpv.1 | Missense_Mutation | SNP | 37 |
| 3 | MPZL1    | uc001geo.3 | Missense_Mutation | SNP | 37 |
| 3 | RIF1     | uc002txm.3 | Silent            | SNP | 37 |
| 3 | CLCN4    | uc004csy.4 | Silent            | SNP | 37 |
| 3 | IGSF1    | uc004ewe.4 | Splice_Site       | SNP | 37 |
| 3 | SACS     | uc001uon.2 | Missense_Mutation | SNP | 37 |
| 3 | ZNF785   | uc002dyw.2 | Missense_Mutation | SNP | 37 |
| 3 | PAMR1    | uc001mwf.3 | Missense_Mutation | SNP | 37 |
| 3 | DYSF     | uc010fen.3 | Silent            | SNP | 37 |
| 3 | COL12A1  | uc021zbv.1 | Silent            | SNP | 37 |
| 3 | CEP350   | uc001gnt.3 | Nonsense_Mutation | SNP | 37 |
| 3 | RNF220   | uc001clv.1 | Missense_Mutation | SNP | 37 |
| 3 | ORMDL1   | uc002urb.4 | 3'UTR             | SNP | 37 |
| 3 | OR1J2    | uc004bmj.2 | Silent            | SNP | 37 |
| 3 | SNTG2    | uc002qwq.3 | Missense_Mutation | SNP | 37 |
| 3 | RPH3A    | uc010syl.2 | Missense_Mutation | SNP | 37 |
| 3 | NOS2     | uc002gzu.3 | Missense_Mutation | SNP | 37 |
| 3 | NDUFV1   | uc001omj.2 | Missense_Mutation | SNP | 37 |
| 3 | NEIL3    | uc003iut.2 | Nonsense_Mutation | SNP | 37 |
| 3 | STON2    | uc001xvk.1 | Missense_Mutation | SNP | 37 |

|   |          |            |                   |     |    |
|---|----------|------------|-------------------|-----|----|
| 3 | ALKBH6   | uc010eep.1 | 3'UTR             | SNP | 37 |
| 3 | KCNE1L   | uc004eoh.3 | Missense_Mutation | SNP | 37 |
| 3 | URB2     | uc001hts.1 | Missense_Mutation | SNP | 37 |
| 3 | DDI2     | uc001awx.2 | Missense_Mutation | SNP | 37 |
| 3 | SLCO1A2  | uc001res.3 | Missense_Mutation | SNP | 37 |
| 3 | NBPF7    | uc010oxk.2 | Silent            | SNP | 37 |
| 3 | OR5D14   | uc010rim.2 | Missense_Mutation | SNP | 37 |
| 3 | SLC5A8   | uc001thz.4 | Missense_Mutation | SNP | 37 |
| 3 | PCDHB6   | uc003lir.3 | Missense_Mutation | SNP | 37 |
| 3 | POLR2G   | uc001nva.3 | Silent            | SNP | 37 |
| 3 | KLK8     | uc002puq.1 | Missense_Mutation | SNP | 37 |
| 3 | MMP13    | uc001phl.3 | Missense_Mutation | SNP | 37 |
| 3 | CNR1     | uc010kbz.3 | Missense_Mutation | SNP | 37 |
| 3 | OR5H14   | uc003dsg.1 | Missense_Mutation | SNP | 37 |
| 3 | SCN10A   | uc003ciq.3 | Missense_Mutation | SNP | 37 |
| 3 | ZFP41    | uc003yxw.3 | Missense_Mutation | SNP | 37 |
| 3 | USP8     | uc001zym.4 | Silent            | SNP | 37 |
| 3 | NRXN1    | uc021vhg.1 | Silent            | SNP | 37 |
| 3 | IL29     | uc002okv.3 | Missense_Mutation | SNP | 37 |
| 3 | FBN3     | uc002mjf.3 | Silent            | SNP | 37 |
| 3 | CDH18    | uc003jgd.3 | Missense_Mutation | SNP | 37 |
| 3 | ZNRF4    | uc002mca.4 | Silent            | SNP | 37 |
| 3 | DNAH7    | uc002utj.4 | Silent            | SNP | 37 |
| 3 | GSDMA    | uc002htl.1 | Missense_Mutation | SNP | 37 |
| 3 | FBXO38   | uc003lpf.1 | Missense_Mutation | SNP | 37 |
| 3 | DTX3L    | uc003efk.3 | Missense_Mutation | SNP | 37 |
| 3 | DIAPH1   | uc003llb.4 | Missense_Mutation | SNP | 37 |
| 3 | SEMA6D   | uc010bek.3 | Silent            | SNP | 37 |
| 3 | SPTBN5   | uc001zos.3 | Missense_Mutation | SNP | 37 |
| 3 | SYT3     | uc002pst.3 | Missense_Mutation | SNP | 37 |
| 3 | BSN      | uc003cxe.4 | Missense_Mutation | SNP | 37 |
| 3 | PKHD1L1  | uc003yne.3 | Missense_Mutation | SNP | 37 |
| 3 | ASPSCR1  | uc002kcy.3 | Missense_Mutation | SNP | 37 |
| 3 | ANKFN1   | uc002iun.1 | Missense_Mutation | SNP | 37 |
| 3 | OR52H1   | uc010qzh.2 | Missense_Mutation | SNP | 37 |
| 3 | IDO1     | uc003xnm.3 | Missense_Mutation | SNP | 37 |
| 3 | ZSWIM4   | uc002mxh.1 | Missense_Mutation | SNP | 37 |
| 3 | GRIK3    | uc001cba.1 | 3'UTR             | SNP | 37 |
| 3 | C1orf173 | uc001dgg.3 | Missense_Mutation | SNP | 37 |
| 3 | GIMAP8   | uc003whj.3 | Silent            | SNP | 37 |
| 3 | MYH1     | uc002gmo.3 | Silent            | SNP | 37 |
| 3 | FAM135B  | uc003yuy.3 | Missense_Mutation | SNP | 37 |
| 3 | Unknown  |            | IGR               | SNP | 37 |

|   |             |            |                       |     |    |
|---|-------------|------------|-----------------------|-----|----|
| 3 | NLRP2       | uc021vbq.1 | Missense_Mutation     | SNP | 37 |
| 3 | CUL9        | uc010jyk.3 | 5'UTR                 | SNP | 37 |
| 3 | WASH3P      | uc002cdi.3 | 3'UTR                 | SNP | 37 |
| 3 | FOXJ2       | uc001qtu.3 | 3'UTR                 | SNP | 37 |
| 3 | ZNF234      | uc002oym.3 | Missense_Mutation     | SNP | 37 |
| 3 | HSP90AB1    | uc003oxa.1 | Missense_Mutation     | SNP | 37 |
| 3 | CD84        | uc001fwh.4 | Silent                | SNP | 37 |
| 3 | MUC16       | uc002mkp.3 | Missense_Mutation     | SNP | 37 |
| 3 | PCDH15      | uc010qhy.1 | Missense_Mutation     | SNP | 37 |
| 3 | SCN9A       | uc010fpl.3 | Missense_Mutation     | SNP | 37 |
| 3 | WLS         | uc001dee.3 | Intron                | SNP | 37 |
| 3 | RNF212      | uc003gcj.3 | Silent                | SNP | 37 |
| 3 | ZNF773      | uc002qox.3 | Silent                | SNP | 37 |
| 3 | DSG3        | uc002kws.3 | Missense_Mutation     | SNP | 37 |
| 3 | KIF21B      | uc001gvs.2 | Silent                | SNP | 37 |
| 3 | NRP2        | uc002vaw.3 | Silent                | SNP | 37 |
| 3 | TNS4        | uc010cxb.3 | Missense_Mutation     | SNP | 37 |
| 3 | GYPA        | uc003ijm.1 | Splice_Site           | SNP | 37 |
| 3 | SNORD115-15 | uc001yzq.1 | Intron                | SNP | 37 |
| 3 | PDE7B       | uc003qgr.3 | Missense_Mutation     | SNP | 37 |
| 3 | PPP4R2      | uc003dph.1 | Missense_Mutation     | SNP | 37 |
| 3 | PDZD2       | uc003jhl.3 | Silent                | SNP | 37 |
| 3 | LAMP3       | uc003flh.4 | Splice_Site           | SNP | 37 |
| 3 | SLC43A1     | uc001nkk.3 | Missense_Mutation     | SNP | 37 |
| 3 | TAT         | uc002far.3 | 3'UTR                 | SNP | 37 |
| 3 | MUC2        | uc001lsx.1 | Silent                | SNP | 37 |
| 3 | LAMA5       | uc002ycq.3 | Missense_Mutation     | SNP | 37 |
| 3 | GPR112      | uc004ezu.1 | 3'UTR                 | SNP | 37 |
| 3 | MKL1        | uc003ayw.1 | Silent                | SNP | 37 |
| 3 | ZNF536      | uc002nsu.1 | Missense_Mutation     | SNP | 37 |
| 3 | TPTE2       | uc001umd.3 | Silent                | SNP | 37 |
| 3 | CEP290      | uc001tar.3 | Splice_Site           | SNP | 37 |
| 3 | CNGB3       | uc003ydx.3 | Missense_Mutation     | SNP | 37 |
| 3 | CYP4Z2P     | uc001cqo.1 | Non-coding_Transcript | SNP | 37 |
| 3 | DIDO1       | uc002ydr.2 | Missense_Mutation     | SNP | 37 |
| 3 | ST3GAL3     | uc001ckb.3 | Silent                | SNP | 37 |
| 3 | CALM2       | uc002rvt.2 | 5'UTR                 | SNP | 37 |
| 3 | SLC17A4     | uc003nfe.3 | Silent                | SNP | 37 |
| 3 | PBX1        | uc001gct.3 | 3'UTR                 | SNP | 37 |
| 3 | NBAS        | uc002rcc.1 | Missense_Mutation     | SNP | 37 |
| 3 | DNAH11      | uc003svc.3 | Missense_Mutation     | SNP | 37 |
| 3 | C2orf83     | uc002vph.3 | 5'UTR                 | SNP | 37 |
| 3 | IGSF10      | uc011bod.2 | Missense_Mutation     | SNP | 37 |

|   |          |            |                   |     |    |
|---|----------|------------|-------------------|-----|----|
| 3 | PRPF4B   | uc003mvv.3 | 3'UTR             | SNP | 37 |
| 3 | FAM178A  | uc001krs.3 | Missense_Mutation | SNP | 37 |
| 3 | OR13C4   | uc011lvn.2 | Missense_Mutation | SNP | 37 |
| 3 | COPA     | uc001fvv.4 | 5'UTR             | SNP | 37 |
| 3 | PLB1     | uc002rmb.2 | Missense_Mutation | SNP | 37 |
| 3 | ZNF615   | uc002pyf.2 | Silent            | SNP | 37 |
| 3 | FAT3     | uc001pdj.4 | Silent            | SNP | 37 |
| 3 | MLL3     | uc003wla.3 | Missense_Mutation | SNP | 37 |
| 3 | ANKFN1   | uc002iun.1 | Silent            | SNP | 37 |
| 3 | NMD3     | uc003fec.3 | Missense_Mutation | SNP | 37 |
| 3 | KLHL38   | uc003yqs.1 | Silent            | SNP | 37 |
| 3 | LARP1    | uc003lvo.3 | Silent            | SNP | 37 |
| 3 | IQGAP3   | uc001fpf.3 | Silent            | SNP | 37 |
| 3 | CRX      | uc002phq.4 | Missense_Mutation | SNP | 37 |
| 3 | NAP1L2   | uc004ebi.3 | Missense_Mutation | SNP | 37 |
| 3 | AX747376 | uc021utt.1 | Silent            | SNP | 37 |
| 3 | NRXN3    | uc001xun.3 | Missense_Mutation | SNP | 37 |
| 3 | ZNF525   | uc010eqn.3 | 3'UTR             | SNP | 37 |
| 3 | PSMD8    | uc002oii.4 | 5'UTR             | SNP | 37 |
| 3 | TTN      | uc021vsy.1 | Silent            | SNP | 37 |
| 3 | WASH1    | uc010mgm.1 | 3'UTR             | SNP | 37 |
| 3 | CDH9     | uc011cnv.1 | 5'UTR             | SNP | 37 |
| 3 | PTPRT    | uc010ggj.3 | Missense_Mutation | SNP | 37 |
| 3 | ATXN10   | uc003bgm.2 | Missense_Mutation | SNP | 37 |
| 3 | RNF19A   | uc003yjk.1 | Missense_Mutation | SNP | 37 |
| 3 | PSG2     | uc002ovr.3 | Silent            | SNP | 37 |
| 3 | ABCG8    | uc002rtq.3 | Silent            | SNP | 37 |
| 3 | DRD5     | uc003gmb.4 | Missense_Mutation | SNP | 37 |
| 3 | LYST     | uc001hxj.2 | Missense_Mutation | SNP | 37 |
| 3 | ZNF804A  | uc002uph.3 | Silent            | SNP | 37 |
| 3 | FOXP2    | uc003vgz.3 | Silent            | SNP | 37 |
| 3 | C1orf106 | uc001gvo.3 | Missense_Mutation | SNP | 37 |
| 3 | ZNF627   | uc002msk.2 | 3'UTR             | SNP | 37 |
| 3 | SLC4A7   | uc011aww.2 | Missense_Mutation | SNP | 37 |
| 3 | ABCG1    | uc010gpb.2 | Nonsense_Mutation | SNP | 37 |
| 3 | DNAH5    | uc003jfd.2 | Silent            | SNP | 37 |
| 3 | TMLHE    | uc004fnn.3 | Missense_Mutation | SNP | 37 |
| 3 | NRAS     | uc009wgu.3 | Missense_Mutation | SNP | 37 |
| 3 | KCNQ3    | uc003ytj.3 | Missense_Mutation | SNP | 37 |
| 3 | MS4A10   | uc001npz.1 | Silent            | SNP | 37 |
| 3 | ADAM7    | uc003xeb.3 | Missense_Mutation | SNP | 37 |
| 3 | TPT1     | uc001uzy.1 | Intron            | SNP | 37 |
| 3 | SFTPD    | uc001kbh.3 | Silent            | SNP | 37 |



|   |                |            |                   |     |    |
|---|----------------|------------|-------------------|-----|----|
| 3 | H1FX           | uc003elx.3 | Missense_Mutation | SNP | 37 |
| 3 | SLC38A5        | uc010nid.3 | Silent            | SNP | 37 |
| 3 | ZNF473         | uc002prn.3 | Silent            | SNP | 37 |
| 3 | PCDH17         | uc001vhq.1 | Missense_Mutation | SNP | 37 |
| 3 | CAPN6          | uc004epc.2 | Missense_Mutation | SNP | 37 |
| 3 | FRG1B          | uc002wvm.1 | Splice_Site       | SNP | 37 |
| 3 | TMEM110-MUSTN1 | uc003dgd.3 | 3'UTR             | SNP | 37 |
| 3 | GZMA           | uc003jpm.3 | Splice_Site       | SNP | 37 |
| 3 | PCDHAC2        | uc003lic.2 | Missense_Mutation | SNP | 37 |
| 3 | PRSS37         | uc003vws.2 | Silent            | SNP | 37 |
| 3 | FAM75D3        | uc010mpt.2 | 3'UTR             | SNP | 37 |
| 3 | GLRA2          | uc010neq.3 | 3'UTR             | SNP | 37 |
| 3 | SLC26A8        | uc003olm.3 | Missense_Mutation | SNP | 37 |
| 3 | LOC338651      | uc009ycx.1 | Missense_Mutation | SNP | 37 |
| 3 | ZNF676         | uc002nqs.1 | Missense_Mutation | SNP | 37 |
| 3 | FSHR           | uc002rww.3 | Missense_Mutation | SNP | 37 |
| 3 | SUV420H1       | uc001onm.1 | Missense_Mutation | SNP | 37 |
| 3 | BAGE           | uc002yit.1 | 5'UTR             | SNP | 37 |
| 3 | TRPC4          | uc010abx.3 | Silent            | SNP | 37 |
| 3 | PLCE1          | uc001kjk.3 | 5'UTR             | SNP | 37 |
| 3 | PSG5           | uc002ovu.3 | Missense_Mutation | SNP | 37 |
| 3 | PRB2           | uc010shk.1 | Missense_Mutation | SNP | 37 |
| 3 | PIK3CB         | uc011bmq.2 | Missense_Mutation | SNP | 37 |
| 3 | SEPT6          | uc011mtw.1 | 3'UTR             | SNP | 37 |
| 3 | FAM47C         | uc004ddl.2 | Silent            | SNP | 37 |
| 3 | AMPD1          | uc001efe.2 | Missense_Mutation | SNP | 37 |
| 3 | MAGEC3         | uc004fbs.3 | Missense_Mutation | SNP | 37 |
| 3 | PNCK           | uc011myu.2 | Silent            | SNP | 37 |
| 3 | DAZL           | uc003cba.3 | Missense_Mutation | SNP | 37 |
| 3 | STEAP1         | uc003ujx.3 | Missense_Mutation | SNP | 37 |
| 3 | NONO           | uc004dzo.3 | Nonsense_Mutation | SNP | 37 |
| 3 | DNAH8          | uc021yzh.1 | Missense_Mutation | SNP | 37 |
| 3 | DOCK9          | uc021rlw.1 | Silent            | SNP | 37 |
| 3 | TOP3A          | uc002gsw.1 | 5'UTR             | SNP | 37 |
| 3 | ANKRD30A       | uc021ppc.1 | Silent            | SNP | 37 |
| 3 | ARHGAP44       | uc002gnr.4 | Silent            | SNP | 37 |
| 3 | TTN            | uc021vsy.1 | Missense_Mutation | SNP | 37 |
| 3 | TPSG1          | uc002ckw.2 | Missense_Mutation | SNP | 37 |
| 3 | ZNF273         | uc003tto.3 | Missense_Mutation | SNP | 37 |
| 3 | PMFBP1         | uc002fcc.4 | 3'UTR             | SNP | 37 |
| 3 | PAPSS1         | uc003hyk.3 | Missense_Mutation | SNP | 37 |
| 3 | RIBC1          | uc004dsk.3 | Missense_Mutation | SNP | 37 |
| 3 | SIGLEC17P      | uc010ycv.2 | Missense_Mutation | SNP | 37 |

|   |             |            |                   |     |    |
|---|-------------|------------|-------------------|-----|----|
| 3 | SPATA8      | uc002bue.3 | 3'UTR             | SNP | 37 |
| 3 | ATP8B4      | uc001zxu.3 | Missense_Mutation | SNP | 37 |
| 3 | GABRG2      | uc010jic.3 | Missense_Mutation | SNP | 37 |
| 3 | VASN        | uc002cwj.1 | Missense_Mutation | SNP | 37 |
| 3 | NLRP4       | uc002qmd.4 | Silent            | SNP | 37 |
| 3 | HYDIN       | uc010yii.1 | Silent            | SNP | 37 |
| 3 | CDC42BPA    | uc001hqt.2 | Silent            | SNP | 37 |
| 3 | RFX6        | uc003pxm.3 | Silent            | SNP | 37 |
| 3 | LPHN2       | uc001dit.4 | Missense_Mutation | SNP | 37 |
| 3 | ENDOV       | uc002jyk.3 | Missense_Mutation | SNP | 37 |
| 3 | HAS1        | uc002pxn.1 | Missense_Mutation | SNP | 37 |
| 3 | NRXN3       | uc001xun.3 | 3'UTR             | SNP | 37 |
| 3 | OR5K2       | uc011bgx.2 | Missense_Mutation | SNP | 37 |
| 3 | C15orf2     | uc001ywo.3 | 3'UTR             | SNP | 37 |
| 3 | TNXB        | uc003nzl.2 | Silent            | SNP | 37 |
| 3 | TTN         | uc021vsy.1 | Nonsense_Mutation | SNP | 37 |
| 3 | OR4X2       | uc001ngs.1 | Silent            | SNP | 37 |
| 3 | C10orf68    | uc001iwm.1 | Missense_Mutation | SNP | 37 |
| 3 | FPGT-TNNI3K | uc001dge.2 | Missense_Mutation | SNP | 37 |
| 3 | DSCAM       | uc002yyq.1 | Silent            | SNP | 37 |
| 3 | TRPC3       | uc003ieg.2 | Missense_Mutation | SNP | 37 |
| 3 | MYO16       | uc010agk.2 | Nonsense_Mutation | SNP | 37 |
| 3 | AMIGO2      | uc001rpm.3 | Missense_Mutation | SNP | 37 |
| 3 | CDH7        | uc002ljz.3 | Splice_Site       | SNP | 37 |
| 3 | SPANXN1     | uc004fcb.2 | 3'UTR             | SNP | 37 |
| 3 | KSR2        | uc001two.2 | Missense_Mutation | SNP | 37 |
| 3 | DLEC1       | uc003chp.1 | Silent            | SNP | 37 |
| 3 | ITLN1       | uc001fxc.3 | 3'UTR             | SNP | 37 |
| 3 | BANK1       | uc003hvy.4 | Missense_Mutation | SNP | 37 |
| 3 | AP4E1       | uc001zyx.2 | 3'UTR             | SNP | 37 |
| 3 | SIGLEC1     | uc002wja.3 | Silent            | SNP | 37 |
| 3 | SPTA1       | uc001fst.1 | Silent            | SNP | 37 |
| 3 | PAQR6       | uc001fnz.1 | 5'UTR             | SNP | 37 |
| 3 | PTPRC       | uc001gur.1 | Missense_Mutation | SNP | 37 |
| 3 | CAPN13      | uc021vfn.1 | Missense_Mutation | SNP | 37 |
| 3 | ZNF334      | uc002xsa.3 | Missense_Mutation | SNP | 37 |
| 3 | CHMP4C      | uc003ycl.3 | 3'UTR             | SNP | 37 |
| 3 | SMC1B       | uc003bgc.3 | Nonsense_Mutation | SNP | 37 |
| 3 | STEAP1      | uc003ujx.3 | Missense_Mutation | SNP | 37 |
| 3 | RYR1        | uc002oit.3 | Silent            | SNP | 37 |
| 3 | KRT76       | uc001sax.3 | Silent            | SNP | 37 |
| 3 | ZFYVE26     | uc001xka.2 | Missense_Mutation | SNP | 37 |
| 3 | DCX         | uc011msv.2 | Silent            | SNP | 37 |

|   |          |            |                   |     |    |
|---|----------|------------|-------------------|-----|----|
| 3 | GJB3     | uc001bxx.3 | 3'UTR             | SNP | 37 |
| 3 | SLC38A11 | uc002ucw.2 | Missense_Mutation | SNP | 37 |
| 3 | GNAT3    | uc011kgu.2 | Silent            | SNP | 37 |
| 3 | AUP1     | uc010yry.2 | Missense_Mutation | SNP | 37 |
| 3 | ATP13A5  | uc011bsq.2 | Missense_Mutation | SNP | 37 |
| 3 | ANK3     | uc001jky.3 | Missense_Mutation | SNP | 37 |
| 3 | OR9Q2    | uc010rka.2 | Missense_Mutation | SNP | 37 |
| 3 | PRRC2C   | uc010pmg.2 | Missense_Mutation | SNP | 37 |
| 3 | XKR6     | uc003wtk.1 | Missense_Mutation | SNP | 37 |
| 3 | EGR3     | uc003xcm.1 | Missense_Mutation | SNP | 37 |
| 3 | CDH18    | uc003jgd.3 | 3'UTR             | SNP | 37 |
| 3 | ADORA3   | uc001ebh.4 | Silent            | SNP | 37 |
| 3 | OR4A5    | uc001nhi.2 | Missense_Mutation | SNP | 37 |
| 3 | ABCA1    | uc004bcl.3 | Missense_Mutation | SNP | 37 |
| 3 | CYP2J2   | uc001czq.3 | Missense_Mutation | SNP | 37 |
| 3 | RBM47    | uc003gvc.2 | Silent            | SNP | 37 |
| 3 | DTL      | uc009xdc.3 | Missense_Mutation | SNP | 37 |
| 3 | MPP7     | uc001iua.1 | Missense_Mutation | SNP | 37 |
| 3 | TIE1     | uc001ciu.3 | Silent            | SNP | 37 |
| 3 | SGOL1    | uc003cbu.3 | Silent            | SNP | 37 |
| 3 | CPNE6    | uc001wln.3 | Missense_Mutation | SNP | 37 |
| 3 | GPR141   | uc003tfm.1 | Missense_Mutation | SNP | 37 |
| 3 | NOC2L    | uc009vjq.3 | 5'UTR             | SNP | 37 |
| 3 | IQCE     | uc010ksm.1 | 3'UTR             | SNP | 37 |
| 3 | ZNF345   | uc002oex.3 | Missense_Mutation | SNP | 37 |
| 3 | APLP2    | uc010sby.2 | Missense_Mutation | SNP | 37 |
| 3 | NAV1     | uc021phi.1 | Silent            | SNP | 37 |
| 3 | SGSM1    | uc003abg.2 | Silent            | SNP | 37 |
| 3 | EPCAM    | uc002rvx.3 | 5'UTR             | SNP | 37 |
| 3 | OR4K13   | uc010tkz.2 | Silent            | SNP | 37 |
| 3 | PRKG2    | uc003hmh.2 | Missense_Mutation | SNP | 37 |
| 3 | MYO18B   | uc003abz.1 | Silent            | SNP | 37 |
| 3 | MOGAT1   | uc010fws.1 | Missense_Mutation | SNP | 37 |
| 3 | ZNF679   | uc003tsx.3 | Missense_Mutation | SNP | 37 |
| 3 | C4B      | uc011dpd.2 | Missense_Mutation | SNP | 37 |
| 3 | DLG3     | uc004dyi.2 | Missense_Mutation | SNP | 37 |
| 3 | GRIP2    | uc021wtn.1 | Missense_Mutation | SNP | 37 |
| 3 | PIP5K1A  | uc001exj.3 | Missense_Mutation | SNP | 37 |
| 3 | ZSCAN18  | uc010yht.1 | Intron            | SNP | 37 |
| 3 | FBN1     | uc001zwx.2 | Missense_Mutation | SNP | 37 |
| 3 | ANKLE1   | uc002nga.2 | Missense_Mutation | SNP | 37 |
| 3 | ATP10B   | uc003lyn.3 | 3'UTR             | SNP | 37 |
| 3 | C12orf51 | uc021reb.1 | Silent            | SNP | 37 |

|   |          |            |                       |     |    |
|---|----------|------------|-----------------------|-----|----|
| 3 | BABAM1   | uc002nfu.3 | 3'UTR                 | SNP | 37 |
| 3 | OR4K2    | uc001vwh.1 | Silent                | SNP | 37 |
| 3 | AFM      | uc003hhb.3 | Missense_Mutation     | SNP | 37 |
| 3 | ZNF675   | uc002nri.3 | Missense_Mutation     | SNP | 37 |
| 3 | PLRG1    | uc003iny.3 | 3'UTR                 | SNP | 37 |
| 3 | GPSM2    | uc010ovc.2 | Silent                | SNP | 37 |
| 3 | BMP15    | uc011mnw.2 | Missense_Mutation     | SNP | 37 |
| 3 | PAK7     | uc002wnl.2 | Missense_Mutation     | SNP | 37 |
| 3 | SCYL1    | uc001oea.1 | Missense_Mutation     | SNP | 37 |
| 3 | TRIML1   | uc003izm.1 | Nonsense_Mutation     | SNP | 37 |
| 3 | OSMR     | uc003jln.2 | Silent                | SNP | 37 |
| 3 | IRS4     | uc004eoc.2 | Missense_Mutation     | SNP | 37 |
| 3 | PRB1     | uc001qzw.1 | Missense_Mutation     | SNP | 37 |
| 3 | NOS1     | uc001twn.2 | Missense_Mutation     | SNP | 37 |
| 3 | SLMAP    | uc003dje.1 | 3'UTR                 | SNP | 37 |
| 3 | PLBD1    | uc001rcc.1 | Missense_Mutation     | SNP | 37 |
| 3 | PPP1R12A | uc001syz.3 | Missense_Mutation     | SNP | 37 |
| 3 | MYH15    | uc003dxa.1 | Silent                | SNP | 37 |
| 3 | RNF31    | uc001wmn.1 | Missense_Mutation     | SNP | 37 |
| 3 | SALL3    | uc002lmt.3 | Missense_Mutation     | SNP | 37 |
| 3 | AKAP9    | uc003ulg.3 | Missense_Mutation     | SNP | 37 |
| 3 | PPARGC1A | uc003gqs.3 | Missense_Mutation     | SNP | 37 |
| 3 | ARHGEF19 | uc001ayc.1 | Silent                | SNP | 37 |
| 3 | ADAMTSL1 | uc003zne.4 | Nonsense_Mutation     | SNP | 37 |
| 3 | BC080605 | uc004aex.3 | Non-coding_Transcript | SNP | 37 |
| 3 | MIR656   | uc021sdv.1 | Non-coding_Transcript | SNP | 37 |
| 3 | OR5R1    | uc010rji.2 | Silent                | SNP | 37 |
| 3 | WFIKKN2  | uc002isv.4 | Missense_Mutation     | SNP | 37 |
| 3 | Unknown  |            | IGR                   | SNP | 37 |
| 3 | SNAP91   | uc021zcf.1 | Missense_Mutation     | SNP | 37 |
| 3 | FAM73A   | uc010ork.2 | Missense_Mutation     | SNP | 37 |
| 3 | PRDM5    | uc003idn.3 | Missense_Mutation     | SNP | 37 |
| 3 | ADAMTS7  | uc002bej.4 | Missense_Mutation     | SNP | 37 |
| 3 | KLK2     | uc010ycl.2 | Missense_Mutation     | SNP | 37 |
| 3 | TMEM145  | uc002otk.1 | Silent                | SNP | 37 |
| 3 | DCLK1    | uc001uvf.3 | Silent                | SNP | 37 |
| 3 | RNF150   | uc003iio.1 | Missense_Mutation     | SNP | 37 |
| 3 | IL6ST    | uc003jqj.3 | Silent                | SNP | 37 |
| 3 | FAIM2    | uc001rvj.2 | Splice_Site           | SNP | 37 |
| 3 | DKC1     | uc004fmm.3 | Missense_Mutation     | SNP | 37 |
| 3 | C3orf38  | uc003dqw.3 | 3'UTR                 | SNP | 37 |
| 3 | AMOT     | uc004epr.3 | Silent                | SNP | 37 |
| 3 | CELSR3   | uc003cuf.1 | Silent                | SNP | 37 |

|   |           |            |                   |     |    |
|---|-----------|------------|-------------------|-----|----|
| 3 | APOL5     | uc003aof.3 | Nonsense_Mutation | SNP | 37 |
| 3 | OR2T8     | uc010pzc.2 | Silent            | SNP | 37 |
| 3 | TMEM145   | uc002otk.1 | Missense_Mutation | SNP | 37 |
| 3 | CADPS     | uc003dll.2 | Silent            | SNP | 37 |
| 3 | C20orf160 | uc002wxf.2 | Silent            | SNP | 37 |
| 3 | CCDC88A   | uc002ryv.2 | Silent            | SNP | 37 |
| 3 | MYT1L     | uc002qxe.3 | Missense_Mutation | SNP | 37 |
| 3 | HOXA7     | uc003sys.3 | 3'UTR             | SNP | 37 |
| 3 | PPP4C     | uc002dwe.3 | 3'UTR             | SNP | 37 |
| 3 | OR8G1     | uc001pzx.3 | 3'UTR             | SNP | 37 |
| 3 | LYZ       | uc001suw.2 | 3'UTR             | SNP | 37 |
| 3 | ZNF780B   | uc002omu.3 | Missense_Mutation | SNP | 37 |
| 3 | NWD1      | uc002neu.4 | 3'UTR             | SNP | 37 |
| 3 | ZBTB41    | uc001gtx.1 | Silent            | SNP | 37 |
| 3 | CTAGE11P  | uc010ths.2 | 3'UTR             | SNP | 37 |
| 3 | DZANK1    | uc010zsa.2 | Silent            | SNP | 37 |
| 3 | COL6A1    | uc002zhu.1 | 3'UTR             | SNP | 37 |
| 3 | ZNF516    | uc021ulp.1 | Silent            | SNP | 37 |
| 3 | TBC1D14   | uc011bwg.2 | Missense_Mutation | SNP | 37 |
| 3 | VAT1L     | uc002ffg.1 | Missense_Mutation | SNP | 37 |
| 3 | SPZ1      | uc003kgn.3 | Missense_Mutation | SNP | 37 |
| 3 | IL3RA     | uc004cps.3 | Missense_Mutation | SNP | 37 |
| 3 | OR2L2     | uc001idw.3 | Missense_Mutation | SNP | 37 |
| 3 | AQPEP     | uc003kro.3 | Splice_Site       | SNP | 37 |
| 3 | PCDH15    | uc010qhy.1 | Missense_Mutation | SNP | 37 |
| 3 | KRTAP5-5  | uc001lty.3 | Missense_Mutation | SNP | 37 |
| 3 | SYNE1     | uc021zhb.1 | Silent            | SNP | 37 |
| 3 | FUT5      | uc010duo.3 | Silent            | SNP | 37 |
| 3 | ACTRT1    | uc004eum.3 | Missense_Mutation | SNP | 37 |
| 3 | CHD7      | uc003xue.3 | Missense_Mutation | SNP | 37 |
| 3 | RPUSD1    | uc002cka.3 | Silent            | SNP | 37 |
| 3 | OR4C6     | uc010rik.2 | Missense_Mutation | SNP | 37 |
| 3 | AKAP3     | uc001qnb.4 | Silent            | SNP | 37 |
| 3 | ANKRD30A  | uc021ppc.1 | Missense_Mutation | SNP | 37 |
| 3 | MUC16     | uc002mkp.3 | Missense_Mutation | SNP | 37 |
| 3 | LECT2     | uc003lbe.1 | Intron            | SNP | 37 |
| 3 | SCN5A     | uc021wvo.1 | Missense_Mutation | SNP | 37 |
| 3 | FANCD2    | uc003buw.3 | Missense_Mutation | SNP | 37 |
| 3 | KRT27     | uc002hvg.3 | 5'UTR             | SNP | 37 |
| 3 | PADI4     | uc001baj.2 | Silent            | SNP | 37 |
| 3 | OR2G6     | uc001ien.1 | Missense_Mutation | SNP | 37 |
| 3 | BC018860  | uc011mfh.2 | 5'UTR             | SNP | 37 |
| 3 | PRB2      | uc010shk.1 | Missense_Mutation | SNP | 37 |

|   |          |            |                   |     |    |
|---|----------|------------|-------------------|-----|----|
| 3 | RNF183   | uc004bgz.3 | 3'UTR             | SNP | 37 |
| 3 | MASP1    | uc003fri.3 | Missense_Mutation | SNP | 37 |
| 3 | BCDIN3D  | uc001rvh.3 | Intron            | SNP | 37 |
| 3 | GLRA1    | uc003lut.3 | Missense_Mutation | SNP | 37 |
| 3 | FAM190A  | uc003hsv.4 | Intron            | SNP | 37 |
| 3 | YEATS4   | uc001sux.3 | Missense_Mutation | SNP | 37 |
| 3 | XKR5     | uc022aqv.1 | Missense_Mutation | SNP | 37 |
| 3 | PRSS16   | uc003nja.3 | Missense_Mutation | SNP | 37 |
| 3 | ZNF713   | uc003tra.2 | Missense_Mutation | SNP | 37 |
| 3 | DPYD     | uc001drv.3 | Silent            | SNP | 37 |
| 3 | KCNJ3    | uc002tyv.1 | 5'UTR             | SNP | 37 |
| 3 | MTMR8    | uc004dvs.3 | Intron            | SNP | 37 |
| 3 | MAGEC2   | uc004fbu.2 | Silent            | SNP | 37 |
| 3 | CASC1    | uc001rgk.3 | 5'Flank           | SNP | 37 |
| 3 | SH3BP4   | uc002vvp.3 | Silent            | SNP | 37 |
| 3 | GUCY1A2  | uc009yxn.1 | Missense_Mutation | SNP | 37 |
| 3 | TPM4     | uc002ndi.2 | Missense_Mutation | SNP | 37 |
| 3 | HAO2     | uc001ehr.1 | Nonsense_Mutation | SNP | 37 |
| 3 | CYP2C19  | uc010qnz.2 | Silent            | SNP | 37 |
| 3 | ELOVL5   | uc011dwx.2 | Missense_Mutation | SNP | 37 |
| 3 | FCF1     | uc001xqh.3 | 5'UTR             | SNP | 37 |
| 3 | CYP4F2   | uc002nbs.1 | Silent            | SNP | 37 |
| 3 | CABP5    | uc002phu.2 | 3'UTR             | SNP | 37 |
| 3 | DQ582462 | uc021syy.1 | 5'Flank           | SNP | 37 |
| 3 | ZNF681   | uc002nrk.4 | Silent            | SNP | 37 |
| 3 | MAG      | uc002nyy.2 | Silent            | SNP | 37 |
| 3 | BC068290 | uc010vgb.2 | Silent            | SNP | 37 |
| 3 | TRPM8    | uc002vvh.3 | Silent            | SNP | 37 |
| 3 | USP30    | uc010sxi.2 | Missense_Mutation | SNP | 37 |
| 3 | DCC      | uc002lfe.2 | Missense_Mutation | SNP | 37 |
| 3 | RP1L1    | uc003wtc.3 | Silent            | SNP | 37 |
| 3 | DJ439558 | uc021prl.1 | 5'Flank           | SNP | 37 |
| 3 | MASP2    | uc001aru.3 | 3'UTR             | SNP | 37 |
| 3 | CASQ1    | uc010pja.2 | Silent            | SNP | 37 |
| 3 | DOM3Z    | uc003nyp.1 | Silent            | SNP | 37 |
| 3 | AKAP14   | uc004ese.3 | Missense_Mutation | SNP | 37 |
| 3 | NUAK2    | uc009xbj.1 | 3'UTR             | SNP | 37 |
| 3 | TTN      | uc021vsy.1 | Silent            | SNP | 37 |
| 3 | DSC1     | uc002kwn.3 | Intron            | SNP | 37 |
| 3 | ZNF157   | uc004dhr.1 | Missense_Mutation | SNP | 37 |
| 3 | DHX15    | uc003gqx.3 | Missense_Mutation | SNP | 37 |
| 3 | VPS16    | uc002whe.3 | Missense_Mutation | SNP | 37 |
| 3 | ARHGAP44 | uc002gnr.4 | Nonsense_Mutation | SNP | 37 |

|   |          |            |                   |     |    |
|---|----------|------------|-------------------|-----|----|
| 3 | TUBAL3   | uc001ihy.3 | Missense_Mutation | SNP | 37 |
| 3 | OR6Y1    | uc010pil.2 | Silent            | SNP | 37 |
| 3 | AOC4     | uc002ibw.1 | 3'UTR             | SNP | 37 |
| 3 | ENTPD7   | uc009xwl.3 | Missense_Mutation | SNP | 37 |
| 3 | PCNX     | uc001xmo.2 | Silent            | SNP | 37 |
| 3 | EIF2C1   | uc001bzl.3 | Nonsense_Mutation | SNP | 37 |
| 3 | PPA2     | uc003hxl.3 | Missense_Mutation | SNP | 37 |
| 3 | MS4A15   | uc009ynf.1 | Intron            | SNP | 37 |
| 3 | LARP1    | uc003lvo.3 | Missense_Mutation | SNP | 37 |
| 3 | PCDH12   | uc003llx.3 | Missense_Mutation | SNP | 37 |
| 3 | BIRC8    | uc002qbk.3 | 5'UTR             | SNP | 37 |
| 3 | SPAG17   | uc001ehk.2 | Missense_Mutation | SNP | 37 |
| 3 | WDR78    | uc001dcx.3 | Missense_Mutation | SNP | 37 |
| 3 | CYP7B1   | uc003xvj.2 | Missense_Mutation | SNP | 37 |
| 3 | LRP5     | uc001ont.3 | Missense_Mutation | SNP | 37 |
| 3 | PCDHGC5  | uc003ljw.2 | Missense_Mutation | SNP | 37 |
| 3 | ADAM21P1 | uc010ttg.2 | Missense_Mutation | SNP | 37 |
| 3 | BSDC1    | uc001bvi.3 | Missense_Mutation | SNP | 37 |
| 3 | CLEC17A  | uc010dzn.2 | Nonsense_Mutation | SNP | 37 |
| 3 | MAGEL2   | uc001ywj.4 | Silent            | SNP | 37 |
| 3 | ARSH     | uc011mhj.2 | Missense_Mutation | SNP | 37 |
| 3 | C9orf153 | uc004aoo.3 | Missense_Mutation | SNP | 37 |
| 3 | SLC16A2  | uc010nlr.1 | Missense_Mutation | SNP | 37 |
| 3 | DNAH9    | uc002gne.3 | Missense_Mutation | SNP | 37 |
| 3 | LTV1     | uc003qju.1 | 5'UTR             | SNP | 37 |
| 3 | GALNT11  | uc010lqg.1 | Silent            | SNP | 37 |
| 3 | P2RY4    | uc004dxz.1 | Missense_Mutation | SNP | 37 |
| 3 | DEFB125  | uc002wcv.3 | 3'UTR             | SNP | 37 |
| 3 | ACP5     | uc002msg.4 | Silent            | SNP | 37 |
| 3 | ZNF343   | uc010gao.1 | Silent            | SNP | 37 |
| 3 | ARGLU1   | uc010age.1 | 3'UTR             | SNP | 37 |
| 3 | MTMR7    | uc003wxm.3 | Silent            | SNP | 37 |
| 3 | EMR1     | uc002mfw.3 | Silent            | SNP | 37 |
| 3 | USP54    | uc001juo.3 | Missense_Mutation | SNP | 37 |
| 3 | C7orf31  | uc003sxn.1 | Silent            | SNP | 37 |
| 3 | C9orf43  | uc004bho.4 | Missense_Mutation | SNP | 37 |
| 3 | CIT      | uc001txj.2 | Missense_Mutation | SNP | 37 |
| 3 | MLLT6    | uc002hqi.4 | Silent            | SNP | 37 |
| 3 | PLIN4    | uc002mar.1 | 3'UTR             | SNP | 37 |
| 3 | Unknown  |            | IGR               | SNP | 37 |
| 3 | CNKSR1   | uc001bln.4 | 3'UTR             | SNP | 37 |
| 3 | HCAR2    | uc001ucx.1 | Missense_Mutation | SNP | 37 |
| 3 | ANKRD30A | uc021ppc.1 | Silent            | SNP | 37 |

|   |           |            |                       |     |    |
|---|-----------|------------|-----------------------|-----|----|
| 3 | PDE2A     | uc010rrc.2 | Silent                | SNP | 37 |
| 3 | ANK1      | uc003xom.3 | Missense_Mutation     | SNP | 37 |
| 3 | MYL3      | uc003cql.1 | Missense_Mutation     | SNP | 37 |
| 3 | CTAGE10P  | uc001vdk.2 | Missense_Mutation     | SNP | 37 |
| 3 | ADAMDEC1  | uc003xdz.2 | Missense_Mutation     | SNP | 37 |
| 3 | HEPHL1    | uc001pep.2 | Silent                | SNP | 37 |
| 3 | KIF11     | uc001kic.3 | Missense_Mutation     | SNP | 37 |
| 3 | SNAPC1    | uc001xft.3 | 3'UTR                 | SNP | 37 |
| 3 | RNF31     | uc001wmn.1 | Silent                | SNP | 37 |
| 3 | GPR98     | uc003kju.3 | Missense_Mutation     | SNP | 37 |
| 3 | OR1B1     | uc011lyz.2 | Missense_Mutation     | SNP | 37 |
| 3 | LCP1      | uc001vay.4 | 5'UTR                 | SNP | 37 |
| 3 | HSP90B1   | uc001tkb.1 | 5'UTR                 | SNP | 37 |
| 3 | SLC15A1   | uc001vno.3 | Nonsense_Mutation     | SNP | 37 |
| 3 | C1QTNF5   | uc001pwj.2 | 5'UTR                 | SNP | 37 |
| 3 | UNC13A    | uc021uqk.1 | Missense_Mutation     | SNP | 37 |
| 3 | MX2       | uc002yzf.1 | Missense_Mutation     | SNP | 37 |
| 3 | POM121L12 | uc003tpz.3 | Missense_Mutation     | SNP | 37 |
| 3 | KCNH6     | uc002jay.3 | Missense_Mutation     | SNP | 37 |
| 3 | WWP2      | uc002exw.1 | 5'UTR                 | SNP | 37 |
| 3 | LCE2D     | uc001fag.3 | Missense_Mutation     | SNP | 37 |
| 3 | METTL2B   | uc003vnf.3 | Silent                | SNP | 37 |
| 3 | FAM190A   | uc003hsv.4 | Missense_Mutation     | SNP | 37 |
| 3 | CD8A      | uc010ytn.2 | 3'UTR                 | SNP | 37 |
| 3 | DSCAM     | uc002yyq.1 | Missense_Mutation     | SNP | 37 |
| 3 | NWD1      | uc002neu.4 | Missense_Mutation     | SNP | 37 |
| 3 | PTN       | uc003vtq.2 | 3'UTR                 | SNP | 37 |
| 3 | ZNF266    | uc002mll.3 | 5'UTR                 | SNP | 37 |
| 3 | C19orf33  | uc002ohu.1 | Missense_Mutation     | SNP | 37 |
| 3 | SERPINA3  | uc001ydo.4 | 3'UTR                 | SNP | 37 |
| 3 | PARP8     | uc003jon.4 | Missense_Mutation     | SNP | 37 |
| 3 | ZAN       | uc003uwj.3 | Silent                | SNP | 37 |
| 3 | NFE2      | uc009zkn.3 | Missense_Mutation     | SNP | 37 |
| 3 | SP100     | uc002vqu.1 | Nonsense_Mutation     | SNP | 37 |
| 3 | LILRA1    | uc002qgh.1 | Silent                | SNP | 37 |
| 3 | ZNF90     | uc021url.1 | Non-coding_Transcript | SNP | 37 |
| 3 | NEUROD4   | uc001sgp.4 | Silent                | SNP | 37 |
| 3 | HAO2      | uc001ehr.1 | Silent                | SNP | 37 |
| 3 | OR3A1     | uc002fvh.1 | Missense_Mutation     | SNP | 37 |
| 3 | PATL1     | uc001noe.4 | Missense_Mutation     | SNP | 37 |
| 3 | GHR       | uc021xxv.1 | Missense_Mutation     | SNP | 37 |
| 3 | ATP1B1    | uc001gfr.1 | Missense_Mutation     | SNP | 37 |
| 3 | LTV1      | uc003qju.1 | 5'UTR                 | SNP | 37 |



|   |            |            |                   |     |    |
|---|------------|------------|-------------------|-----|----|
| 3 | PRKAG1     | uc001rsz.3 | 5'Flank           | SNP | 37 |
| 3 | TARDBP     | uc001art.3 | Silent            | SNP | 37 |
| 3 | EDARADD    | uc001hxu.1 | 3'UTR             | SNP | 37 |
| 3 | SIN3B      | uc010xpi.1 | 5'UTR             | SNP | 37 |
| 3 | HSP90AB1   | uc003oxa.1 | 3'UTR             | SNP | 37 |
| 3 | SORCS3     | uc001kyi.1 | Silent            | SNP | 37 |
| 3 | MYOCD      | uc002gnp.1 | 3'UTR             | SNP | 37 |
| 3 | SLC22A17   | uc001wjl.3 | 3'UTR             | SNP | 37 |
| 3 | SH2D4B     | uc001kck.1 | Missense_Mutation | SNP | 37 |
| 3 | ARID1A     | uc001bmv.1 | Silent            | SNP | 37 |
| 3 | ASCC3      | uc003pqk.3 | Missense_Mutation | SNP | 37 |
| 3 | FNIP2      | uc003iqe.4 | Missense_Mutation | SNP | 37 |
| 3 | LRP1B      | uc002tvj.1 | Missense_Mutation | SNP | 37 |
| 3 | EYA4       | uc011ecs.2 | Silent            | SNP | 37 |
| 3 | KRTAP4-7   | uc010wfn.2 | Missense_Mutation | SNP | 37 |
| 3 | PINK1      | uc001bdm.3 | Silent            | SNP | 37 |
| 3 | LRP1B      | uc002tvj.1 | Missense_Mutation | SNP | 37 |
| 3 | ABCB11     | uc002ueo.1 | 5'UTR             | SNP | 37 |
| 3 | AIF1       | uc003nuy.3 | 3'UTR             | SNP | 37 |
| 3 | HAUS5      | uc002oam.1 | Missense_Mutation | SNP | 37 |
| 3 | ANO5       | uc001mqi.2 | Nonsense_Mutation | SNP | 37 |
| 3 | PIGV       | uc001bmz.3 | Silent            | SNP | 37 |
| 3 | SPAG11B    | uc003wrl.3 | Missense_Mutation | SNP | 37 |
| 3 | BROX       | uc001hnq.1 | Intron            | SNP | 37 |
| 3 | CDH12      | uc010iuc.2 | Missense_Mutation | SNP | 37 |
| 3 | UGT2B10    | uc003hee.3 | Missense_Mutation | SNP | 37 |
| 3 | FLNA       | uc004fkk.2 | Missense_Mutation | SNP | 37 |
| 3 | ZFP28      | uc002qni.3 | Missense_Mutation | SNP | 37 |
| 3 | MAFIP      | uc011clu.2 | Intron            | SNP | 37 |
| 3 | AK304483   | uc011bmr.2 | 3'UTR             | SNP | 37 |
| 3 | NUP160     | uc001ngn.1 | Silent            | SNP | 37 |
| 3 | MYPN       | uc001jnm.4 | Silent            | SNP | 37 |
| 3 | NRP2       | uc002vaw.3 | Missense_Mutation | SNP | 37 |
| 3 | DEFB118    | uc002wvr.3 | 3'UTR             | SNP | 37 |
| 3 | PRODH2     | uc002obx.1 | Missense_Mutation | SNP | 37 |
| 3 | ATP13A4    | uc003ftd.3 | Silent            | SNP | 37 |
| 3 | BV13S6J2.1 | uc011ksa.2 | Missense_Mutation | SNP | 37 |
| 3 | HOMEZ      | uc001wjb.2 | Nonsense_Mutation | SNP | 37 |
| 3 | CLDN9      | uc010uwo.1 | 5'UTR             | SNP | 37 |
| 3 | EPPK1      | uc003zaa.1 | Silent            | SNP | 37 |
| 3 | SERPINA5   | uc010ave.2 | 3'UTR             | SNP | 37 |
| 3 | ZMIZ2      | uc003tlr.3 | Silent            | SNP | 37 |
| 3 | EPHA6      | uc010how.1 | Missense_Mutation | SNP | 37 |

|   |               |            |                       |     |    |
|---|---------------|------------|-----------------------|-----|----|
| 3 | DCTN6         | uc003xhy.3 | 5'UTR                 | SNP | 37 |
| 3 | GIMAP1-GIMAP5 | uc022apw.1 | 3'UTR                 | SNP | 37 |
| 3 | TMEM14B       | uc003mzk.4 | 3'UTR                 | SNP | 37 |
| 3 | PLXNC1        | uc001tdc.3 | Missense_Mutation     | SNP | 37 |
| 3 | NCAPG2        | uc011kwe.1 | Nonsense_Mutation     | SNP | 37 |
| 3 | PCDHAC2       | uc003lic.2 | Missense_Mutation     | SNP | 37 |
| 3 | OR9G4         | uc010rjo.2 | Missense_Mutation     | SNP | 37 |
| 3 | CCDC167       | uc003ont.3 | 5'UTR                 | SNP | 37 |
| 3 | PSG3          | uc002oue.3 | Silent                | SNP | 37 |
| 3 | LOC100131347  | uc002hrf.1 | 3'UTR                 | SNP | 37 |
| 3 | XKR4          | uc003xsf.3 | Intron                | SNP | 37 |
| 3 | NDUFS6        | uc003jcy.3 | Missense_Mutation     | SNP | 37 |
| 3 | SUV39H2       | uc021png.1 | Missense_Mutation     | SNP | 37 |
| 3 | NPC1          | uc002kum.4 | Silent                | SNP | 37 |
| 3 | CLEC16A       | uc021tcy.1 | Silent                | SNP | 37 |
| 3 | HEPHL1        | uc001pep.2 | Missense_Mutation     | SNP | 37 |
| 3 | SERPINB3      | uc010dqb.3 | 3'UTR                 | SNP | 37 |
| 3 | SCYL1         | uc001oea.1 | Silent                | SNP | 37 |
| 3 | PCDH15        | uc010qhy.1 | Silent                | SNP | 37 |
| 3 | ZBBX          | uc011bpc.2 | Silent                | SNP | 37 |
| 3 | F8            | uc004fmt.3 | Missense_Mutation     | SNP | 37 |
| 3 | ADAP1         | uc003sjo.4 | Silent                | SNP | 37 |
| 3 | ZNF627        | uc002msk.2 | Missense_Mutation     | SNP | 37 |
| 3 | SLC6A12       | uc001qhz.3 | Missense_Mutation     | SNP | 37 |
| 3 | ZMAT4         | uc003xnr.3 | Missense_Mutation     | SNP | 37 |
| 3 | SLITRK1       | uc001vlk.3 | 5'UTR                 | SNP | 37 |
| 3 | MMP14         | uc001whc.3 | Silent                | SNP | 37 |
| 3 | CYTH2         | uc002pjj.4 | 3'UTR                 | SNP | 37 |
| 3 | NPTX2         | uc003upl.2 | Missense_Mutation     | SNP | 37 |
| 3 | MYH14         | uc010enu.1 | Silent                | SNP | 37 |
| 3 | ZFP2          | uc003mjn.1 | 5'UTR                 | SNP | 37 |
| 3 | CFHR1         | uc001gtl.3 | Missense_Mutation     | SNP | 37 |
| 3 | SLC6A19       | uc003jbw.4 | Silent                | SNP | 37 |
| 3 | ZNF682        | uc002noq.3 | Silent                | SNP | 37 |
| 3 | LOC643201     | uc003mdn.3 | Non-coding_Transcript | SNP | 37 |
| 3 | GRB2          | uc002jnx.4 | Silent                | SNP | 37 |
| 3 | GP9           | uc003elm.2 | Missense_Mutation     | SNP | 37 |
| 3 | ARID1B        | uc003qqn.3 | Nonsense_Mutation     | SNP | 37 |
| 3 | SLC1A5        | uc002pfs.3 | Silent                | SNP | 37 |
| 3 | METTL21C      | uc001vpj.3 | Missense_Mutation     | SNP | 37 |
| 3 | TRIO          | uc003jff.3 | Missense_Mutation     | SNP | 37 |
| 3 | THBS4         | uc021yaw.1 | Missense_Mutation     | SNP | 37 |
| 3 | UCP3          | uc001our.3 | Missense_Mutation     | SNP | 37 |

|   |         |            |                   |     |    |
|---|---------|------------|-------------------|-----|----|
| 3 | RPS6KA6 | uc004eej.2 | Missense_Mutation | SNP | 37 |
| 3 | SRRM2   | uc002crk.3 | Missense_Mutation | SNP | 37 |
| 3 | ZDHHC15 | uc004eci.2 | Silent            | SNP | 37 |
| 3 | RPL26L1 | uc003mcc.3 | Silent            | SNP | 37 |
| 3 | P2RY6   | uc001otm.3 | 3'UTR             | SNP | 37 |
| 3 | TLR3    | uc003iyq.3 | Missense_Mutation | SNP | 37 |
| 3 | CLDN18  | uc003ero.1 | Missense_Mutation | SNP | 37 |
| 3 | DOPEY2  | uc002yvg.3 | Nonsense_Mutation | SNP | 37 |
| 3 | MTCP1   | uc004fmz.2 | 3'UTR             | SNP | 37 |
| 3 | Unknown |            | IGR               | SNP | 37 |
| 3 | UIMC1   | uc021yil.1 | Silent            | SNP | 37 |
| 3 | CLASP1  | uc002tnc.3 | Silent            | SNP | 37 |
| 3 | PHC3    | uc003fgl.2 | Missense_Mutation | SNP | 37 |
| 3 | MMP1    | uc001phi.2 | Missense_Mutation | SNP | 37 |
| 3 | KCNC3   | uc002pru.1 | Missense_Mutation | SNP | 37 |
| 3 | GALNT11 | uc010lqg.1 | Missense_Mutation | SNP | 37 |
| 3 | PROL1   | uc003hfi.3 | Missense_Mutation | SNP | 37 |
| 3 | GPATCH8 | uc002igw.2 | Missense_Mutation | SNP | 37 |
| 3 | ZNF614  | uc002pyj.3 | 5'UTR             | SNP | 37 |
| 3 | TRAK1   | uc003cky.3 | Missense_Mutation | SNP | 37 |
| 3 | CLDN16  | uc003fsi.3 | 5'UTR             | SNP | 37 |
| 3 | ANKRD17 | uc003hgp.3 | Silent            | SNP | 37 |
| 3 | CORIN   | uc003gxm.3 | Silent            | SNP | 37 |
| 3 | CAPN5   | uc009yup.3 | Silent            | SNP | 37 |
| 3 | TAF1L   | uc003zrg.1 | Missense_Mutation | SNP | 37 |
| 3 | NRXN2   | uc021qkw.1 | Silent            | SNP | 37 |
| 3 | TRIM60  | uc003iqy.1 | 3'UTR             | SNP | 37 |
| 3 | IGSF21  | uc001bau.2 | Silent            | SNP | 37 |
| 3 | CRY1    | uc001tmi.3 | Missense_Mutation | SNP | 37 |
| 3 | RELN    | uc022ajr.1 | Silent            | SNP | 37 |
| 3 | PCDHAC2 | uc003lhx.2 | Nonsense_Mutation | SNP | 37 |
| 3 | ADARB1  | uc002zgy.2 | Missense_Mutation | SNP | 37 |
| 3 | OR4D1   | uc010wno.2 | Silent            | SNP | 37 |
| 3 | COL14A1 | uc003yox.3 | Missense_Mutation | SNP | 37 |
| 3 | WNK4    | uc002ibj.3 | Silent            | SNP | 37 |
| 3 | SMAD1   | uc003ikc.3 | Silent            | SNP | 37 |
| 3 | CLDN16  | uc003fsi.3 | 5'UTR             | SNP | 37 |
| 3 | ORMDL2  | uc001shw.1 | Missense_Mutation | SNP | 37 |
| 3 | DYNLT1  | uc003qrn.2 | Silent            | SNP | 37 |
| 3 | ACTR1B  | uc002syb.2 | Missense_Mutation | SNP | 37 |
| 3 | SCN11A  | uc021wvy.1 | Missense_Mutation | SNP | 37 |
| 3 | RBM27   | uc003lnz.4 | Missense_Mutation | SNP | 37 |
| 3 | PRKCG   | uc010yeg.1 | Silent            | SNP | 37 |

|   |             |            |                       |     |    |
|---|-------------|------------|-----------------------|-----|----|
| 3 | MYH1        | uc002gmo.3 | Silent                | SNP | 37 |
| 3 | CSDA        | uc001qyt.3 | Missense_Mutation     | SNP | 37 |
| 3 | BIN2        | uc001ryg.3 | Splice_Site           | SNP | 37 |
| 3 | ZNF225      | uc002oyj.1 | Missense_Mutation     | SNP | 37 |
| 3 | DFNA5       | uc010kus.1 | Intron                | SNP | 37 |
| 3 | PADI3       | uc001bai.3 | Silent                | SNP | 37 |
| 3 | FCRL3       | uc001fqz.4 | Missense_Mutation     | SNP | 37 |
| 3 | TUBGCP2     | uc010qvc.1 | Splice_Site           | SNP | 37 |
| 3 | CGNL1       | uc010bfw.3 | 3'UTR                 | SNP | 37 |
| 3 | ABCB6       | uc002vkc.2 | Nonsense_Mutation     | SNP | 37 |
| 3 | FPGT-TNNI3K | uc001dgb.2 | Silent                | SNP | 37 |
| 3 | CNTNAP3     | uc004abi.3 | Silent                | SNP | 37 |
| 3 | RACGAP1P    | uc001rol.3 | Non-coding_Transcript | SNP | 37 |
| 3 | C19orf33    | uc002ohu.1 | Silent                | SNP | 37 |
| 3 | KCNQ3       | uc003ytj.3 | Silent                | SNP | 37 |
| 3 | BDP1        | uc003kbp.1 | Missense_Mutation     | SNP | 37 |
| 3 | C12orf51    | uc021reb.1 | Silent                | SNP | 37 |
| 3 | PCDHGC5     | uc003ljk.2 | Silent                | SNP | 37 |
| 3 | GJA1        | uc003pyr.3 | Silent                | SNP | 37 |
| 3 | EFEMP1      | uc002rzi.3 | Missense_Mutation     | SNP | 37 |
| 3 | BOD1L2      | uc002lgm.3 | Silent                | SNP | 37 |
| 3 | SCN11A      | uc021wvy.1 | Missense_Mutation     | SNP | 37 |
| 3 | PGK1        | uc004ecz.4 | Missense_Mutation     | SNP | 37 |
| 3 | MEF2B       | uc002nll.2 | Silent                | SNP | 37 |
| 3 | MECOM       | uc011bpj.1 | Missense_Mutation     | SNP | 37 |
| 3 | MUC4        | uc021xjp.1 | Missense_Mutation     | SNP | 37 |
| 3 | PLXNC1      | uc001tdc.3 | Missense_Mutation     | SNP | 37 |
| 3 | KIAA0947    | uc003jdm.4 | Silent                | SNP | 37 |
| 3 | FAM123B     | uc004dvo.3 | Missense_Mutation     | SNP | 37 |
| 3 | HDAC9       | uc003sui.3 | Missense_Mutation     | SNP | 37 |
| 3 | IPW         | uc001yyp.1 | Intron                | SNP | 37 |
| 3 | C1orf173    | uc001dgg.3 | Missense_Mutation     | SNP | 37 |
| 3 | CCDC19      | uc001fui.3 | Silent                | SNP | 37 |
| 3 | TTN         | uc010zfk.1 | Missense_Mutation     | SNP | 37 |
| 3 | AVEN        | uc001zhj.3 | Silent                | SNP | 37 |
| 3 | SLC2A4RG    | uc002yfq.3 | Silent                | SNP | 37 |
| 3 | HAS1        | uc002pxn.1 | Silent                | SNP | 37 |
| 3 | WASH1       | uc010mgm.1 | 3'UTR                 | SNP | 37 |
| 3 | abParts     | uc021ser.1 | Non-coding_Transcript | SNP | 37 |
| 3 | CASP1       | uc001pip.1 | Missense_Mutation     | SNP | 37 |
| 3 | HPN         | uc002nxt.1 | 5'UTR                 | SNP | 37 |
| 3 | ZNF610      | uc002pyx.4 | Missense_Mutation     | SNP | 37 |
| 3 | SPTBN5      | uc001zos.3 | Silent                | SNP | 37 |

|   |          |            |                   |     |    |
|---|----------|------------|-------------------|-----|----|
| 3 | KRT84    | uc001sah.1 | Missense_Mutation | SNP | 37 |
| 3 | MAP1S    | uc002nhe.1 | Silent            | SNP | 37 |
| 3 | LYZ      | uc001suw.2 | Nonsense_Mutation | SNP | 37 |
| 3 | CHD7     | uc003xue.3 | Missense_Mutation | SNP | 37 |
| 3 | ZNF233   | uc021uvi.1 | Missense_Mutation | SNP | 37 |
| 3 | ZFHX4    | uc003yau.2 | Missense_Mutation | SNP | 37 |
| 3 | HSF2BP   | uc002zdi.3 | 3'UTR             | SNP | 37 |
| 3 | ZNF343   | uc010gao.1 | Missense_Mutation | SNP | 37 |
| 3 | FREM2    | uc001uwv.3 | Missense_Mutation | SNP | 37 |
| 3 | SAGE1    | uc004ezh.3 | Missense_Mutation | SNP | 37 |
| 3 | MYH1     | uc002gmo.3 | Silent            | SNP | 37 |
| 3 | SCARA3   | uc003xga.1 | Missense_Mutation | SNP | 37 |
| 3 | DFNA5    | uc010kus.1 | 3'UTR             | SNP | 37 |
| 3 | ZNF253   | uc002noj.3 | Missense_Mutation | SNP | 37 |
| 3 | OLFML2B  | uc010pkq.2 | Missense_Mutation | SNP | 37 |
| 3 | TENC1    | uc001sbn.3 | Silent            | SNP | 37 |
| 3 | TLL1     | uc011cjm.2 | Missense_Mutation | SNP | 37 |
| 3 | C1orf52  | uc001dkv.3 | Missense_Mutation | SNP | 37 |
| 3 | MAGEA6   | uc004ffq.1 | Missense_Mutation | SNP | 37 |
| 3 | JUP      | uc010wfs.2 | Silent            | SNP | 37 |
| 3 | ZNF117   | uc003ttr.2 | 3'UTR             | SNP | 37 |
| 3 | FAM179A  | uc010ezl.3 | Silent            | SNP | 37 |
| 3 | TMEM207  | uc003fsj.2 | Silent            | SNP | 37 |
| 3 | FAM155B  | uc004dxk.3 | Silent            | SNP | 37 |
| 3 | KALRN    | uc003ehg.3 | Missense_Mutation | SNP | 37 |
| 3 | USP26    | uc010nrm.1 | Missense_Mutation | SNP | 37 |
| 3 | C9orf43  | uc004bho.4 | Silent            | SNP | 37 |
| 3 | MAP1S    | uc002nhe.1 | Missense_Mutation | SNP | 37 |
| 3 | MUC16    | uc002mkp.3 | Missense_Mutation | SNP | 37 |
| 3 | ARFGEF1  | uc003xxo.2 | Missense_Mutation | SNP | 37 |
| 3 | SLC38A5  | uc010nid.3 | Splice_Site       | SNP | 37 |
| 3 | OR4D1    | uc010wno.2 | Missense_Mutation | SNP | 37 |
| 3 | PCDHGC5  | uc003lkt.2 | Silent            | SNP | 37 |
| 3 | PANK1    | uc001kgp.2 | Missense_Mutation | SNP | 37 |
| 3 | CCDC88B  | uc001nzy.3 | Silent            | SNP | 37 |
| 3 | BEND3    | uc003prs.2 | Silent            | SNP | 37 |
| 3 | DOCK9    | uc021rlw.1 | Missense_Mutation | SNP | 37 |
| 3 | TBX10    | uc001omp.3 | Missense_Mutation | SNP | 37 |
| 3 | KIAA1210 | uc004era.4 | Silent            | SNP | 37 |
| 3 | QRICH2   | uc002jrd.1 | Missense_Mutation | SNP | 37 |
| 3 | CATSPERD | uc002mda.3 | Silent            | SNP | 37 |
| 3 | FAM113B  | uc001rpn.3 | Missense_Mutation | SNP | 37 |
| 3 | DNASE1L1 | uc004fks.1 | Missense_Mutation | SNP | 37 |

|   |          |            |                       |     |    |
|---|----------|------------|-----------------------|-----|----|
| 3 | APOBR    | uc002dqb.2 | Silent                | SNP | 37 |
| 3 | NMUR2    | uc003luv.2 | 3'UTR                 | SNP | 37 |
| 3 | KAT6A    | uc010lxb.3 | Missense_Mutation     | SNP | 37 |
| 3 | SPAG11B  | uc003wrx.3 | Missense_Mutation     | SNP | 37 |
| 3 | ENDOV    | uc002jyk.3 | Silent                | SNP | 37 |
| 3 | VSIG4    | uc004dwh.2 | Nonsense_Mutation     | SNP | 37 |
| 3 | PPARA    | uc003bgw.1 | Missense_Mutation     | SNP | 37 |
| 3 | SPAG17   | uc001ehk.2 | Missense_Mutation     | SNP | 37 |
| 3 | GRXCR1   | uc003gwt.3 | Missense_Mutation     | SNP | 37 |
| 3 | RDH16    | uc001smi.4 | Missense_Mutation     | SNP | 37 |
| 3 | CEP135   | uc003hbi.3 | Missense_Mutation     | SNP | 37 |
| 3 | RASA3    | uc001vui.3 | 3'UTR                 | SNP | 37 |
| 3 | C10orf27 | uc010qjm.1 | Missense_Mutation     | SNP | 37 |
| 3 | HDAC11   | uc003bxy.3 | Intron                | SNP | 37 |
| 3 | CLRN2    | uc003gpg.1 | 3'UTR                 | SNP | 37 |
| 3 | KLK3     | uc021uyi.1 | 3'UTR                 | SNP | 37 |
| 3 | APOBR    | uc002dqb.2 | Silent                | SNP | 37 |
| 3 | MBD3     | uc002ltj.3 | Silent                | SNP | 37 |
| 3 | ABCG8    | uc002rtq.3 | Missense_Mutation     | SNP | 37 |
| 3 | PAPPA2   | uc001gkz.3 | Missense_Mutation     | SNP | 37 |
| 3 | L1CAM    | uc004fjb.3 | Silent                | SNP | 37 |
| 3 | BC080605 | uc004aex.3 | Non-coding_Transcript | SNP | 37 |
| 3 | ZFP2     | uc003mjn.1 | 5'UTR                 | SNP | 37 |
| 3 | HAAO     | uc010ynw.1 | 3'UTR                 | SNP | 37 |
| 3 | AARS2    | uc010jza.1 | Missense_Mutation     | SNP | 37 |
| 3 | AMPD1    | uc001efe.2 | Splice_Site           | SNP | 37 |
| 3 | CSMD1    | uc022aqr.1 | Silent                | SNP | 37 |
| 3 | VPS13D   | uc001atv.3 | Missense_Mutation     | SNP | 37 |
| 3 | HEATR2   | uc010krz.1 | Silent                | SNP | 37 |
| 3 | HECW1    | uc003tid.1 | Splice_Site           | SNP | 37 |
| 3 | ADAM21   | uc001xmd.3 | Silent                | SNP | 37 |
| 3 | ZNF235   | uc002oza.4 | Missense_Mutation     | SNP | 37 |
| 3 | B4GALNT1 | uc001spg.1 | Missense_Mutation     | SNP | 37 |
| 3 | PEMT     | uc002grl.3 | Missense_Mutation     | SNP | 37 |
| 3 | SENP6    | uc003pid.4 | Missense_Mutation     | SNP | 37 |
| 3 | PAXIP1   | uc022aqg.1 | Intron                | SNP | 37 |
| 3 | N6AMT1   | uc002ymo.1 | Missense_Mutation     | SNP | 37 |
| 3 | DNAI1    | uc003zum.3 | 5'UTR                 | SNP | 37 |
| 3 | PCDHGC5  | uc003lkt.2 | Silent                | SNP | 37 |
| 3 | ZBBX     | uc011bpc.2 | Missense_Mutation     | SNP | 37 |
| 3 | MGC70870 | uc002kgk.4 | Non-coding_Transcript | SNP | 37 |
| 3 | YWHAH    | uc003alz.3 | Intron                | SNP | 37 |
| 3 | ATP8A1   | uc003gwr.2 | Missense_Mutation     | SNP | 37 |

|   |          |            |                   |     |    |
|---|----------|------------|-------------------|-----|----|
| 3 | TAF1     | uc004dzu.4 | Splice_Site       | SNP | 37 |
| 3 | TPTE     | uc002yip.1 | Missense_Mutation | SNP | 37 |
| 3 | YTHDC2   | uc003kqn.3 | Missense_Mutation | SNP | 37 |
| 3 | PCDH19   | uc010nmz.3 | Missense_Mutation | SNP | 37 |
| 3 | RP1      | uc003xsd.1 | Missense_Mutation | SNP | 37 |
| 3 | IL6ST    | uc003jqq.3 | Missense_Mutation | SNP | 37 |
| 3 | PRDM16   | uc001akf.3 | Silent            | SNP | 37 |
| 3 | POTEE    | uc002tsn.2 | Missense_Mutation | SNP | 37 |
| 3 | CLIC6    | uc010gmt.1 | 3'UTR             | SNP | 37 |
| 3 | OR7D2    | uc002mkz.1 | Missense_Mutation | SNP | 37 |
| 3 | DTX1     | uc001tuk.1 | 3'UTR             | SNP | 37 |
| 3 | CTNNB1   | uc010hia.1 | Missense_Mutation | SNP | 37 |
| 3 | FAM83C   | uc021wck.1 | Missense_Mutation | SNP | 37 |
| 3 | P4HB     | uc002kbn.1 | Missense_Mutation | SNP | 37 |
| 3 | ROBO1    | uc003dqe.2 | Splice_Site       | SNP | 37 |
| 3 | GSS      | uc002xbg.3 | Missense_Mutation | SNP | 37 |
| 3 | DQ582265 | uc004cor.1 | Splice_Site       | SNP | 37 |
| 3 | MUC16    | uc002mkp.3 | Missense_Mutation | SNP | 37 |
| 3 | ARMC4    | uc009xky.3 | Splice_Site       | SNP | 37 |
| 3 | FAT3     | uc001pdj.4 | Missense_Mutation | SNP | 37 |
| 3 | POSTN    | uc001uwo.4 | Silent            | SNP | 37 |
| 3 | SCYL1    | uc001oea.1 | Silent            | SNP | 37 |
| 3 | PPY      | uc002iep.3 | Silent            | SNP | 37 |
| 3 | ATP8A1   | uc003gwr.2 | Missense_Mutation | SNP | 37 |
| 3 | KDM2B    | uc001uat.3 | Missense_Mutation | SNP | 37 |
| 3 | SGMS2    | uc003hyl.4 | Silent            | SNP | 37 |
| 3 | PRKCG    | uc010yeg.1 | Missense_Mutation | SNP | 37 |
| 3 | COX4I2   | uc002wwj.1 | Silent            | SNP | 37 |
| 3 | ZNF542   | uc002qmu.4 | 3'UTR             | SNP | 37 |
| 3 | EDC3     | uc002ayn.3 | Splice_Site       | SNP | 37 |
| 3 | DYSF     | uc010fen.3 | Missense_Mutation | SNP | 37 |
| 3 | ZNF530   | uc002qpk.2 | Missense_Mutation | SNP | 37 |
| 3 | PCDH18   | uc003ihe.4 | Missense_Mutation | SNP | 37 |
| 3 | C18orf34 | uc010xbr.1 | Missense_Mutation | SNP | 37 |
| 3 | LRP1B    | uc002tvj.1 | Missense_Mutation | SNP | 37 |
| 3 | ZMIZ2    | uc003tlr.3 | Missense_Mutation | SNP | 37 |
| 3 | TAAR8    | uc011ecj.2 | Missense_Mutation | SNP | 37 |
| 3 | EYA3     | uc001bpi.2 | Missense_Mutation | SNP | 37 |
| 3 | DDHD1    | uc001xai.3 | Silent            | SNP | 37 |
| 3 | ALKBH6   | uc010eep.1 | 3'UTR             | SNP | 37 |
| 3 | STRN     | uc002rpn.3 | Silent            | SNP | 37 |
| 3 | NUDCD3   | uc003tkz.3 | Missense_Mutation | SNP | 37 |
| 3 | MARCH3   | uc003kuf.3 | Silent            | SNP | 37 |

|   |          |            |                   |     |    |
|---|----------|------------|-------------------|-----|----|
| 3 | ARMC4    | uc009xky.3 | Missense_Mutation | SNP | 37 |
| 3 | BC018860 | uc011mfh.2 | 5'UTR             | SNP | 37 |
| 3 | RICTOR   | uc003jlo.2 | Silent            | SNP | 37 |
| 3 | OR52H1   | uc010qzh.2 | Missense_Mutation | SNP | 37 |
| 3 | KL       | uc001uus.3 | Missense_Mutation | SNP | 37 |
| 3 | JPH3     | uc002fkd.3 | Silent            | SNP | 37 |
| 3 | PANK1    | uc001kgp.2 | Missense_Mutation | SNP | 37 |
| 3 | KCNH8    | uc003cbk.1 | Missense_Mutation | SNP | 37 |
| 4 | CCDC66   | uc003dhz.3 | Frame_Shift_Del   | DEL | 37 |
| 4 | DHX40    | uc002ixn.2 | Frame_Shift_Del   | DEL | 37 |
| 4 | SMARCA1  | uc011muk.1 | Frame_Shift_Del   | DEL | 37 |
| 4 | EPPK1    | uc003zaa.1 | Silent            | SNP | 37 |
| 4 | ABCC1    | uc010bvi.3 | Missense_Mutation | SNP | 37 |
| 4 | S1PR3    | uc004aqe.3 | Missense_Mutation | SNP | 37 |
| 4 | UTRN     | uc003qkt.3 | Silent            | SNP | 37 |
| 4 | TRAPPC12 | uc002qxm.1 | Missense_Mutation | SNP | 37 |
| 4 | ARID2    | uc001ros.1 | Nonsense_Mutation | SNP | 37 |
| 4 | BIRC6    | uc010ezu.3 | Missense_Mutation | SNP | 37 |
| 4 | BMPR2    | uc002uzf.4 | Missense_Mutation | SNP | 37 |
| 4 | BDH2     | uc003hwz.3 | Splice_Site       | SNP | 37 |
| 4 | IMPG1    | uc003pik.1 | Splice_Site       | SNP | 37 |
| 4 | PLCH2    | uc001aji.1 | Silent            | SNP | 37 |
| 4 | C12orf68 | uc001rrj.2 | 5'UTR             | SNP | 37 |
| 4 | KIF2B    | uc002iua.2 | Silent            | SNP | 37 |
| 4 | UGT2B10  | uc003hee.3 | Missense_Mutation | SNP | 37 |
| 4 | MLKL     | uc002fdb.2 | Missense_Mutation | SNP | 37 |
| 4 | TTN      | uc021vsy.1 | Missense_Mutation | SNP | 37 |
| 4 | CACNA1G  | uc002irk.1 | Missense_Mutation | SNP | 37 |
| 4 | CCDC108  | uc002vjl.1 | Silent            | SNP | 37 |
| 4 | SLC6A19  | uc003jbw.4 | Silent            | SNP | 37 |
| 4 | ZNF7     | uc010mge.3 | Missense_Mutation | SNP | 37 |
| 4 | OR2A5    | uc011ktw.2 | Silent            | SNP | 37 |
| 4 | GORASP2  | uc010zdl.2 | Silent            | SNP | 37 |
| 4 | TJAP1    | uc003ovd.2 | Missense_Mutation | SNP | 37 |
| 4 | TRPC3    | uc003ief.2 | 5'UTR             | SNP | 37 |
| 4 | SEMG2    | uc002xni.2 | Nonsense_Mutation | SNP | 37 |
| 4 | C12orf63 | uc021rcc.1 | Silent            | SNP | 37 |
| 4 | ZNF271   | uc002kyq.4 | Silent            | SNP | 37 |
| 4 | MYOM1    | uc002klp.3 | Silent            | SNP | 37 |
| 4 | CDH5     | uc002eom.4 | Silent            | SNP | 37 |
| 4 | KCNT1    | uc011mdq.2 | Missense_Mutation | SNP | 37 |
| 4 | ESCO2    | uc003xgg.3 | Missense_Mutation | SNP | 37 |
| 4 | TAF1C    | uc002fhn.3 | Silent            | SNP | 37 |



|   |          |            |                   |     |    |
|---|----------|------------|-------------------|-----|----|
| 4 | ACAP3    | uc001aeb.2 | Silent            | SNP | 37 |
| 4 | ASTN2    | uc004bjt.2 | 3'UTR             | SNP | 37 |
| 4 | PIPSL    | uc009xuj.2 | Silent            | SNP | 37 |
| 4 | PGLYRP4  | uc001fbo.3 | Missense_Mutation | SNP | 37 |
| 4 | SCN2A    | uc002udc.3 | Missense_Mutation | SNP | 37 |
| 4 | ABCC8    | uc001mnc.3 | Silent            | SNP | 37 |
| 4 | ATP8B4   | uc001zxu.3 | Missense_Mutation | SNP | 37 |
| 4 | EXOC8    | uc001huq.3 | Nonsense_Mutation | SNP | 37 |
| 4 | FLT1     | uc001usb.3 | Missense_Mutation | SNP | 37 |
| 4 | NTF3     | uc001qnk.4 | Missense_Mutation | SNP | 37 |
| 4 | FAM83H   | uc003yzk.3 | Missense_Mutation | SNP | 37 |
| 4 | SALL1    | uc021tif.1 | Missense_Mutation | SNP | 37 |
| 4 | SLC13A1  | uc003vkm.3 | 3'UTR             | SNP | 37 |
| 4 | MYH15    | uc003dxa.1 | Missense_Mutation | SNP | 37 |
| 4 | ZNF311   | uc003nlu.2 | Missense_Mutation | SNP | 37 |
| 4 | NXPH2    | uc002tvi.3 | Silent            | SNP | 37 |
| 4 | CSDAP1   | uc010vfr.1 | Missense_Mutation | SNP | 37 |
| 4 | ANKRD5   | uc002wno.3 | Missense_Mutation | SNP | 37 |
| 4 | ANKRD30B | uc010dlo.2 | Silent            | SNP | 37 |
| 4 | DOCK3    | uc011bds.2 | Silent            | SNP | 37 |
| 4 | ZNF334   | uc002xsa.3 | Missense_Mutation | SNP | 37 |
| 4 | ZNF566   | uc010xtf.2 | Missense_Mutation | SNP | 37 |
| 4 | C7       | uc003jmh.3 | Silent            | SNP | 37 |
| 4 | RAF1     | uc003bxf.4 | Missense_Mutation | SNP | 37 |
| 4 | PPFIA2   | uc001szo.2 | Silent            | SNP | 37 |
| 4 | GPR139   | uc002dgu.1 | Missense_Mutation | SNP | 37 |
| 4 | ABCB5    | uc003sux.1 | 3'UTR             | SNP | 37 |
| 4 | SCML4    | uc010kdf.3 | Silent            | SNP | 37 |
| 4 | CACNA1C  | uc009zdu.1 | Missense_Mutation | SNP | 37 |
| 4 | NME7     | uc001gfu.3 | Missense_Mutation | SNP | 37 |
| 4 | PDCD11   | uc001kwy.1 | Missense_Mutation | SNP | 37 |
| 4 | BIN2     | uc001ryh.3 | 5'UTR             | SNP | 37 |
| 4 | SOGA3    | uc003qbd.3 | 3'UTR             | SNP | 37 |
| 4 | ELOF1    | uc002msd.1 | Missense_Mutation | SNP | 37 |
| 4 | MFN2     | uc001atn.4 | Missense_Mutation | SNP | 37 |
| 4 | GNA12    | uc003smu.3 | Silent            | SNP | 37 |
| 4 | ARRDC2   | uc002nhv.3 | Missense_Mutation | SNP | 37 |
| 4 | NCAN     | uc002nlz.3 | Missense_Mutation | SNP | 37 |
| 4 | LIPG     | uc002ldv.3 | Silent            | SNP | 37 |
| 4 | CCDC27   | uc001akv.2 | Silent            | SNP | 37 |
| 4 | CLEC12A  | uc001qwq.3 | Missense_Mutation | SNP | 37 |
| 4 | RCC2     | uc001bal.3 | Missense_Mutation | SNP | 37 |
| 4 | PPARG    | uc003bwx.3 | Missense_Mutation | SNP | 37 |

|   |           |            |                   |     |    |
|---|-----------|------------|-------------------|-----|----|
| 4 | LOC283788 | uc022brb.1 | 5'UTR             | SNP | 37 |
| 4 | CDX4      | uc011mqk.2 | Missense_Mutation | SNP | 37 |
| 4 | CSMD2     | uc001bxm.1 | Missense_Mutation | SNP | 37 |
| 4 | PTPRT     | uc010ggj.3 | Missense_Mutation | SNP | 37 |
| 4 | NLRP5     | uc002qmj.3 | Silent            | SNP | 37 |
| 4 | LRFN2     | uc003oph.1 | Silent            | SNP | 37 |
| 4 | TRIM58    | uc001ido.3 | Missense_Mutation | SNP | 37 |
| 4 | SFMBT1    | uc003dgf.3 | Missense_Mutation | SNP | 37 |
| 4 | RHPN2     | uc002nue.3 | 5'UTR             | SNP | 37 |
| 4 | GALK2     | uc001zsj.1 | Missense_Mutation | SNP | 37 |
| 4 | WDR33     | uc002tpg.2 | Missense_Mutation | SNP | 37 |
| 4 | VN1R4     | uc010ydu.2 | Missense_Mutation | SNP | 37 |
| 4 | WNT7A     | uc003bye.1 | Missense_Mutation | SNP | 37 |
| 4 | BAGE      | uc002yit.1 | Silent            | SNP | 37 |
| 4 | MDH1B     | uc002vbs.3 | Silent            | SNP | 37 |
| 4 | HNRNPUL2  | uc001nuw.3 | Nonsense_Mutation | SNP | 37 |
| 4 | ZNF556    | uc002lwp.1 | 3'UTR             | SNP | 37 |
| 4 | XYLT1     | uc002dfa.3 | Missense_Mutation | SNP | 37 |
| 4 | GHRHR     | uc003tbx.3 | Nonsense_Mutation | SNP | 37 |
| 4 | CECR2     | uc010gqw.1 | Missense_Mutation | SNP | 37 |
| 4 | SPATA22   | uc002fvm.3 | Missense_Mutation | SNP | 37 |
| 4 | HFM1      | uc001doa.4 | Missense_Mutation | SNP | 37 |
| 4 | ODZ1      | uc010nqy.3 | Splice_Site       | SNP | 37 |
| 4 | SEMA3E    | uc003uhy.2 | 3'UTR             | SNP | 37 |
| 4 | BAGE      | uc002yit.1 | Missense_Mutation | SNP | 37 |
| 4 | DLGAP3    | uc001byc.3 | Silent            | SNP | 37 |
| 4 | PER1      | uc002gkd.3 | Silent            | SNP | 37 |
| 4 | ZNF696    | uc003yxy.4 | Silent            | SNP | 37 |
| 4 | CACNA1C   | uc009zdu.1 | Silent            | SNP | 37 |
| 4 | NXPH2     | uc002tvi.3 | Missense_Mutation | SNP | 37 |
| 4 | FAM195A   | uc002cic.1 | 3'UTR             | SNP | 37 |
| 4 | SLC7A3    | uc004dyn.3 | Missense_Mutation | SNP | 37 |
| 4 | CISD2     | uc003hwt.4 | 3'UTR             | SNP | 37 |
| 4 | GABBR2    | uc004ays.3 | Missense_Mutation | SNP | 37 |
| 4 | RCC1      | uc001bqf.2 | Missense_Mutation | SNP | 37 |
| 4 | SYTL3     | uc003qrp.3 | Missense_Mutation | SNP | 37 |
| 4 | RGNEF     | uc010izf.3 | Missense_Mutation | SNP | 37 |
| 4 | C9orf135  | uc004ahl.3 | 3'UTR             | SNP | 37 |
| 4 | NLRP12    | uc002qcj.4 | Missense_Mutation | SNP | 37 |
| 4 | SLC30A8   | uc003yoh.3 | Missense_Mutation | SNP | 37 |
| 4 | MYOCD     | uc002gno.2 | Missense_Mutation | SNP | 37 |
| 4 | DPYD      | uc001drv.3 | Missense_Mutation | SNP | 37 |
| 4 | RILPL2    | uc001uey.1 | 3'UTR             | SNP | 37 |

|   |                   |            |                       |     |    |
|---|-------------------|------------|-----------------------|-----|----|
| 4 | ADAMTS2           | uc003mjw.3 | Missense_Mutation     | SNP | 37 |
| 4 | HERC4             | uc001jng.4 | Missense_Mutation     | SNP | 37 |
| 4 | SC5DL             | uc001pxs.1 | 3'UTR                 | SNP | 37 |
| 4 | MRPL10            | uc002ily.3 | Missense_Mutation     | SNP | 37 |
| 4 | GDPD2             | uc011mpk.2 | Nonsense_Mutation     | SNP | 37 |
| 4 | EVPL              | uc010wss.1 | Missense_Mutation     | SNP | 37 |
| 4 | SLC9B2            | uc003hwx.4 | Missense_Mutation     | SNP | 37 |
| 4 | ADAM2             | uc003xnj.3 | Splice_Site           | SNP | 37 |
| 4 | MKS1              | uc002ivr.2 | Missense_Mutation     | SNP | 37 |
| 4 | TNFSF15           | uc004bjh.3 | Silent                | SNP | 37 |
| 4 | USP46             | uc003gzn.3 | Missense_Mutation     | SNP | 37 |
| 4 | SORL1             | uc001pxx.3 | Silent                | SNP | 37 |
| 4 | TMPRSS11E         | uc003hdz.4 | Silent                | SNP | 37 |
| 4 | STRADA            | uc002jbp.3 | 3'UTR                 | SNP | 37 |
| 4 | SNRPE             | uc001hai.3 | Missense_Mutation     | SNP | 37 |
| 4 | TTN               | uc021vsy.1 | Missense_Mutation     | SNP | 37 |
| 4 | DSP               | uc003mxx.1 | Silent                | SNP | 37 |
| 4 | SEPT14            | uc003tqz.2 | Splice_Site           | SNP | 37 |
| 4 | ZNF185            | uc011myg.2 | Silent                | SNP | 37 |
| 4 | EPN3              | uc010wms.2 | Missense_Mutation     | SNP | 37 |
| 4 | C2orf53           | uc002rjb.2 | Missense_Mutation     | SNP | 37 |
| 4 | RNF157            | uc002jqz.3 | Missense_Mutation     | SNP | 37 |
| 4 | RASAL1            | uc001tun.2 | Missense_Mutation     | SNP | 37 |
| 4 | UNC13A            | uc021uqk.1 | Silent                | SNP | 37 |
| 4 | STT3B             | uc011axe.2 | Missense_Mutation     | SNP | 37 |
| 4 | MOGAT1            | uc010fws.1 | Silent                | SNP | 37 |
| 4 | FLG               | uc001ezu.1 | Missense_Mutation     | SNP | 37 |
| 4 | KSR1              | uc010crg.3 | Silent                | SNP | 37 |
| 4 | LOC338579         | uc001jcb.1 | Non-coding_Transcript | SNP | 37 |
| 4 | GIMAP1-GIMAP5     | uc003whq.3 | Silent                | SNP | 37 |
| 4 | LMNA              | uc001fni.2 | Splice_Site           | SNP | 37 |
| 4 | NRG3              | uc021pvc.1 | Missense_Mutation     | SNP | 37 |
| 4 | IGFL4             | uc002pdy.1 | 3'UTR                 | SNP | 37 |
| 4 | alpha_immunoglobu | uc001wdk.2 | Missense_Mutation     | SNP | 37 |
| 4 | GJD2              | uc001zis.1 | Missense_Mutation     | SNP | 37 |
| 4 | FNDC8             | uc002hix.3 | Missense_Mutation     | SNP | 37 |
| 4 | ANKMY2            | uc003sti.3 | Silent                | SNP | 37 |
| 4 | UNC13A            | uc021uqk.1 | Intron                | SNP | 37 |
| 4 | LRRC55            | uc001njl.2 | Silent                | SNP | 37 |
| 4 | OR4C6             | uc010rik.2 | Missense_Mutation     | SNP | 37 |
| 4 | ABCA13            | uc003toq.2 | Missense_Mutation     | SNP | 37 |
| 4 | TTN               | uc002und.3 | 3'UTR                 | SNP | 37 |
| 4 | COMMD9            | uc001mwn.4 | Missense_Mutation     | SNP | 37 |

|   |            |            |                       |     |    |
|---|------------|------------|-----------------------|-----|----|
| 4 | USP24      | uc021onw.1 | Missense_Mutation     | SNP | 37 |
| 4 | KLHL36     | uc002fig.3 | Silent                | SNP | 37 |
| 4 | SCN3B      | uc001pza.1 | Missense_Mutation     | SNP | 37 |
| 4 | KRT2       | uc001sat.3 | Missense_Mutation     | SNP | 37 |
| 4 | PKHD1      | uc003pah.1 | Missense_Mutation     | SNP | 37 |
| 4 | CEACAM19   | uc002ozo.4 | Silent                | SNP | 37 |
| 4 | LRRC37A11P | uc002hrd.1 | Non-coding_Transcript | SNP | 37 |
| 4 | HMGCS1     | uc003jnr.4 | Missense_Mutation     | SNP | 37 |
| 4 | FLT1       | uc001usb.3 | Missense_Mutation     | SNP | 37 |
| 4 | XIRP2      | uc002udx.3 | Missense_Mutation     | SNP | 37 |
| 4 | ANKRD20A9P | uc010tcj.1 | Non-coding_Transcript | SNP | 37 |
| 4 | C16orf90   | uc002cvi.3 | Missense_Mutation     | SNP | 37 |
| 4 | MON2       | uc001srg.3 | 5'UTR                 | SNP | 37 |
| 4 | APOL4      | uc003aox.3 | 3'UTR                 | SNP | 37 |
| 4 | ZSCAN18    | uc010yht.1 | Missense_Mutation     | SNP | 37 |
| 4 | PKHD1L1    | uc003yne.3 | Missense_Mutation     | SNP | 37 |
| 4 | CDH12      | uc010iuc.2 | Missense_Mutation     | SNP | 37 |
| 4 | TDRKH      | uc009wnb.1 | Missense_Mutation     | SNP | 37 |
| 4 | UNC5D      | uc003xjr.2 | Silent                | SNP | 37 |
| 4 | NCKAP5     | uc002ttp.3 | Missense_Mutation     | SNP | 37 |
| 4 | MYH1       | uc002gmo.3 | Silent                | SNP | 37 |
| 4 | ABCC10     | uc003ouy.1 | Missense_Mutation     | SNP | 37 |
| 4 | PCLO       | uc003uhx.2 | Missense_Mutation     | SNP | 37 |
| 4 | SIGLEC5    | uc002pxe.3 | Missense_Mutation     | SNP | 37 |
| 4 | OR4C12     | uc010ria.2 | Silent                | SNP | 37 |
| 4 | MAVS       | uc002wjw.4 | Missense_Mutation     | SNP | 37 |
| 4 | FAM190A    | uc003hsv.4 | Missense_Mutation     | SNP | 37 |
| 4 | GLIS3      | uc003zhx.1 | Silent                | SNP | 37 |
| 4 | COL6A2     | uc002zia.1 | Splice_Site           | SNP | 37 |
| 4 | SLCO1B3    | uc010sil.2 | Silent                | SNP | 37 |
| 4 | C16orf71   | uc002cxn.3 | Silent                | SNP | 37 |
| 4 | HPS5       | uc001mod.1 | Missense_Mutation     | SNP | 37 |
| 4 | CDH8       | uc002eoh.3 | 3'UTR                 | SNP | 37 |
| 4 | EPS15L1    | uc002ndx.3 | Missense_Mutation     | SNP | 37 |
| 4 | OR1A1      | uc010vrc.2 | Missense_Mutation     | SNP | 37 |
| 4 | CNDP1      | uc002llq.3 | Missense_Mutation     | SNP | 37 |
| 4 | SEMA5A     | uc003jek.2 | Missense_Mutation     | SNP | 37 |
| 4 | STAT4      | uc002usm.2 | Missense_Mutation     | SNP | 37 |
| 4 | RBM28      | uc003vmp.2 | Missense_Mutation     | SNP | 37 |
| 4 | NOXO1      | uc002cnx.3 | Missense_Mutation     | SNP | 37 |
| 4 | FAM73A     | uc010ork.2 | Silent                | SNP | 37 |
| 4 | ERC2       | uc021wzo.1 | Missense_Mutation     | SNP | 37 |
| 4 | C1QTNF9    | uc001upj.3 | Missense_Mutation     | SNP | 37 |

|   |          |            |                   |     |    |
|---|----------|------------|-------------------|-----|----|
| 4 | MAP4K2   | uc001obh.3 | Missense_Mutation | SNP | 37 |
| 4 | DPP6     | uc003wlk.3 | 3'UTR             | SNP | 37 |
| 4 | KIAA1755 | uc002xhy.1 | Silent            | SNP | 37 |
| 4 | PTCHD2   | uc001ash.4 | Silent            | SNP | 37 |
| 4 | NME9     | uc003esg.3 | Nonsense_Mutation | SNP | 37 |
| 4 | FRAS1    | uc003h1b.2 | Missense_Mutation | SNP | 37 |
| 4 | SCN5A    | uc021wvo.1 | Silent            | SNP | 37 |
| 4 | SUN1     | uc021zym.1 | Silent            | SNP | 37 |
| 4 | IMP3     | uc010bkl.2 | Missense_Mutation | SNP | 37 |
| 4 | STATH    | uc003heu.1 | Missense_Mutation | SNP | 37 |
| 4 | PCDHB15  | uc003lje.3 | Silent            | SNP | 37 |
| 4 | MLKL     | uc002fdb.2 | 3'UTR             | SNP | 37 |
| 4 | SEPP1    | uc011cps.2 | Missense_Mutation | SNP | 37 |
| 4 | ZNF827   | uc003ikn.3 | Missense_Mutation | SNP | 37 |
| 4 | GYS2     | uc001rfb.3 | Silent            | SNP | 37 |
| 4 | SYNPO    | uc003lsn.3 | Silent            | SNP | 37 |
| 4 | LRFN4    | uc001ojr.3 | Missense_Mutation | SNP | 37 |
| 4 | OR52K1   | uc001za.2  | Missense_Mutation | SNP | 37 |
| 4 | LAMA1    | uc002knm.3 | Missense_Mutation | SNP | 37 |
| 4 | NDST4    | uc003ibu.3 | Missense_Mutation | SNP | 37 |
| 4 | MACF1    | uc021olw.1 | Missense_Mutation | SNP | 37 |
| 4 | HEXA     | uc010ukn.2 | Intron            | SNP | 37 |
| 4 | SLC2A3   | uc001qtr.3 | Intron            | SNP | 37 |
| 4 | GHR      | uc021xxv.1 | Silent            | SNP | 37 |
| 4 | RYR1     | uc002oit.3 | Silent            | SNP | 37 |
| 4 | EDARADD  | uc001hxu.1 | Missense_Mutation | SNP | 37 |
| 4 | ARPP21   | uc011axy.2 | Missense_Mutation | SNP | 37 |
| 4 | DGKB     | uc003ssz.3 | Silent            | SNP | 37 |
| 4 | FCRL5    | uc009wsm.3 | Silent            | SNP | 37 |
| 4 | CFL2     | uc001wsh.3 | 5'UTR             | SNP | 37 |
| 4 | ZFH3     | uc002fck.3 | Missense_Mutation | SNP | 37 |
| 4 | ARAP3    | uc003llm.3 | Missense_Mutation | SNP | 37 |
| 4 | PPM1J    | uc001ect.1 | 3'UTR             | SNP | 37 |
| 4 | NLRP9    | uc002qly.3 | Missense_Mutation | SNP | 37 |
| 4 | EFCAB3   | uc010wpc.2 | Missense_Mutation | SNP | 37 |
| 4 | NCDN     | uc001bza.3 | Missense_Mutation | SNP | 37 |
| 4 | SPHK2    | uc002pjw.3 | Missense_Mutation | SNP | 37 |
| 4 | ARG2     | uc001xjs.3 | Silent            | SNP | 37 |
| 4 | ENPP6    | uc003iwc.3 | Nonsense_Mutation | SNP | 37 |
| 4 | TMC5     | uc002dgc.4 | Silent            | SNP | 37 |
| 4 | PADI3    | uc001bai.3 | Silent            | SNP | 37 |
| 4 | PROP1    | uc003mif.1 | Missense_Mutation | SNP | 37 |
| 4 | ALB      | uc003hgs.4 | Missense_Mutation | SNP | 37 |

|   |              |            |                       |     |    |
|---|--------------|------------|-----------------------|-----|----|
| 4 | GRIA1        | uc011dcy.2 | Missense_Mutation     | SNP | 37 |
| 4 | LOC100499466 | uc002jgq.3 | Non-coding_Transcript | SNP | 37 |
| 4 | MSRB3        | uc001ssn.3 | Silent                | SNP | 37 |
| 4 | MGAM         | uc003vwy.3 | Intron                | SNP | 37 |
| 4 | MUC16        | uc002mkp.3 | Missense_Mutation     | SNP | 37 |
| 4 | SVEP1        | uc010mtz.3 | Missense_Mutation     | SNP | 37 |
| 4 | NBPF10       | uc009wig.1 | Silent                | SNP | 37 |
| 4 | MIP          | uc001slh.3 | Silent                | SNP | 37 |
| 4 | WDR49        | uc011bpd.1 | Nonsense_Mutation     | SNP | 37 |
| 4 | C14orf166    | uc010aod.3 | Nonsense_Mutation     | SNP | 37 |
| 4 | FRAS1        | uc003h1b.2 | Missense_Mutation     | SNP | 37 |
| 4 | ADCY5        | uc003egh.2 | Silent                | SNP | 37 |
| 4 | C20orf79     | uc002wrk.3 | 5'UTR                 | SNP | 37 |
| 4 | ASZ1         | uc003vjb.2 | 3'UTR                 | SNP | 37 |
| 4 | MORC1        | uc003dxl.3 | Missense_Mutation     | SNP | 37 |
| 4 | PRKAG2       | uc003wkk.3 | Missense_Mutation     | SNP | 37 |
| 4 | TRIML1       | uc003izm.1 | Silent                | SNP | 37 |
| 4 | OR2M1P       | uc001idy.1 | Missense_Mutation     | SNP | 37 |
| 4 | GH2          | uc002jcl.1 | Silent                | SNP | 37 |
| 4 | MYO5B        | uc002leb.2 | Silent                | SNP | 37 |
| 4 | PTGS2        | uc001gsb.3 | Splice_Site           | SNP | 37 |
| 4 | GTF2IRD2P1   | uc003txs.1 | Silent                | SNP | 37 |
| 4 | IQGAP2       | uc003kek.3 | Missense_Mutation     | SNP | 37 |
| 4 | IRF2BP1      | uc002pds.1 | Silent                | SNP | 37 |
| 4 | OR6T1        | uc010sab.2 | Missense_Mutation     | SNP | 37 |
| 4 | SALL1        | uc021tif.1 | Missense_Mutation     | SNP | 37 |
| 4 | CLYBL        | uc001vok.3 | Missense_Mutation     | SNP | 37 |
| 4 | GGT1         | uc003aay.1 | 5'UTR                 | SNP | 37 |
| 4 | GRK6         | uc021yiu.1 | Silent                | SNP | 37 |
| 4 | DHX32        | uc001ljf.1 | Missense_Mutation     | SNP | 37 |
| 4 | TBX18        | uc003pkl.1 | Silent                | SNP | 37 |
| 4 | OR2C1        | uc002cuw.1 | Missense_Mutation     | SNP | 37 |
| 4 | SYNE1        | uc021z1b.1 | Silent                | SNP | 37 |
| 4 | CACNA1E      | uc009wxt.3 | Silent                | SNP | 37 |
| 4 | GTF2IRD1     | uc010lbq.3 | Missense_Mutation     | SNP | 37 |
| 4 | SERPINA6     | uc001ycv.3 | 3'UTR                 | SNP | 37 |
| 4 | OR2A1        | uc011kud.2 | Silent                | SNP | 37 |
| 4 | LOC650368    | uc010qxs.1 | Non-coding_Transcript | SNP | 37 |
| 4 | ADAM2        | uc003xnj.3 | Missense_Mutation     | SNP | 37 |
| 4 | THSD4        | uc002atb.1 | Silent                | SNP | 37 |
| 4 | UTP6         | uc002hgr.3 | 3'UTR                 | SNP | 37 |
| 4 | HS3ST2       | uc002dli.3 | Silent                | SNP | 37 |
| 4 | PSMC1        | uc001xyf.3 | Missense_Mutation     | SNP | 37 |

|   |          |            |                   |     |    |
|---|----------|------------|-------------------|-----|----|
| 4 | GSTA2    | uc003pay.3 | Missense_Mutation | SNP | 37 |
| 4 | ANKRD11  | uc002fmx.1 | Missense_Mutation | SNP | 37 |
| 4 | PSMD5    | uc004bko.3 | Nonsense_Mutation | SNP | 37 |
| 4 | DPYD     | uc001drv.3 | Missense_Mutation | SNP | 37 |
| 4 | ABCC6P2  | uc002dcu.2 | Splice_Site       | SNP | 37 |
| 4 | NEB      | uc002txu.3 | Missense_Mutation | SNP | 37 |
| 4 | ITGA1    | uc003jou.3 | Missense_Mutation | SNP | 37 |
| 4 | UVSSA    | uc003gde.4 | Silent            | SNP | 37 |
| 4 | DPYS     | uc003yly.4 | Missense_Mutation | SNP | 37 |
| 4 | PTPRB    | uc001swc.4 | 3'UTR             | SNP | 37 |
| 4 | CACNA1C  | uc009zdu.1 | Missense_Mutation | SNP | 37 |
| 4 | KIAA1644 | uc003bet.2 | 3'UTR             | SNP | 37 |
| 4 | MIR329-2 | uc021scr.1 | 5'Flank           | SNP | 37 |
| 4 | ATF7IP   | uc001rbw.3 | Missense_Mutation | SNP | 37 |
| 4 | SPEF2    | uc003jjo.3 | Missense_Mutation | SNP | 37 |
| 4 | SLC10A7  | uc010ioz.2 | 3'UTR             | SNP | 37 |
| 4 | DCDC1    | uc001msv.3 | Missense_Mutation | SNP | 37 |
| 4 | ZNF707   | uc003yze.4 | Missense_Mutation | SNP | 37 |
| 4 | CLSTN2   | uc003etn.3 | Missense_Mutation | SNP | 37 |
| 4 | LRRC30   | uc010wzk.2 | Silent            | SNP | 37 |
| 4 | SBF1     | uc003blh.3 | Nonsense_Mutation | SNP | 37 |
| 4 | RIF1     | uc002txm.3 | Silent            | SNP | 37 |
| 4 | FREM2    | uc001uwv.3 | Missense_Mutation | SNP | 37 |
| 4 | MLL      | uc001ptb.3 | Missense_Mutation | SNP | 37 |
| 4 | HIST1H1E | uc003ngq.3 | Missense_Mutation | SNP | 37 |
| 4 | KCNJ18   | uc002gyv.1 | Silent            | SNP | 37 |
| 4 | CASP10   | uc002uxj.1 | Missense_Mutation | SNP | 37 |
| 4 | DMRTA2   | uc010ona.2 | Missense_Mutation | SNP | 37 |
| 4 | FAM19A4  | uc021xag.1 | Intron            | SNP | 37 |
| 4 | APOB     | uc002red.3 | Silent            | SNP | 37 |
| 4 | CSMD3    | uc003ynu.3 | Missense_Mutation | SNP | 37 |
| 4 | ATP9A    | uc002xwg.1 | Missense_Mutation | SNP | 37 |
| 4 | INTS4    | uc001oys.3 | Missense_Mutation | SNP | 37 |
| 4 | MTA1     | uc001yqx.3 | Silent            | SNP | 37 |
| 4 | TAB2     | uc003qmj.3 | Missense_Mutation | SNP | 37 |
| 4 | DACH1    | uc021rkj.1 | Missense_Mutation | SNP | 37 |
| 4 | PAX2     | uc001krk.4 | Missense_Mutation | SNP | 37 |
| 4 | GFRAL    | uc003pcm.1 | Missense_Mutation | SNP | 37 |
| 4 | TET3     | uc002skb.4 | Silent            | SNP | 37 |
| 4 | MAP3K3   | uc002jbe.3 | Missense_Mutation | SNP | 37 |
| 4 | TSPAN18  | uc001myg.3 | Missense_Mutation | SNP | 37 |
| 4 | TOR1AIP2 | uc001gnn.3 | 5'UTR             | SNP | 37 |
| 4 | BEND2    | uc004cyj.4 | Nonsense_Mutation | SNP | 37 |

|   |           |             |                   |     |    |
|---|-----------|-------------|-------------------|-----|----|
| 4 | IGFN1     | uc001gwc.3  | Missense_Mutation | SNP | 37 |
| 4 | ZNF366    | uc003kce.1  | Missense_Mutation | SNP | 37 |
| 4 | P DPR     | uc002eyf.1  | Missense_Mutation | SNP | 37 |
| 4 | GYS2      | uc001rfb.3  | Silent            | SNP | 37 |
| 4 | UPF3B     | uc004erz.2  | Nonsense_Mutation | SNP | 37 |
| 4 | SCNN1A    | uc001qnw.3  | Missense_Mutation | SNP | 37 |
| 4 | MYO7B     | uc002top.3  | Missense_Mutation | SNP | 37 |
| 4 | ARSJ      | uc003ibq.1  | Missense_Mutation | SNP | 37 |
| 4 | KCNQ5     | uc011dyh.2  | Missense_Mutation | SNP | 37 |
| 4 | RAPGEF4   | uc010zef.1  | 5'UTR             | SNP | 37 |
| 4 | GPR179    | uc002h pz.3 | Silent            | SNP | 37 |
| 4 | ZNF568    | uc002ofc.3  | Missense_Mutation | SNP | 37 |
| 4 | PRKCB     | uc002dme.3  | Missense_Mutation | SNP | 37 |
| 4 | RIMS2     | uc003y lp.3 | 5'UTR             | SNP | 37 |
| 4 | SCN9A     | uc010fpl.3  | Silent            | SNP | 37 |
| 4 | VWCE      | uc001nra.3  | Missense_Mutation | SNP | 37 |
| 4 | KY        | uc010hty.3  | Missense_Mutation | SNP | 37 |
| 4 | CSMD1     | uc022aqr.1  | Missense_Mutation | SNP | 37 |
| 4 | ZBTB34    | uc004bqm.4  | Silent            | SNP | 37 |
| 4 | BAIAP3    | uc002clk.2  | Silent            | SNP | 37 |
| 4 | FAM5B     | uc001glf.3  | Silent            | SNP | 37 |
| 4 | ADAMTS3   | uc003h gk.2 | Silent            | SNP | 37 |
| 4 | C16orf70  | uc002erc.3  | Silent            | SNP | 37 |
| 4 | KIN       | uc001ijt.3  | Silent            | SNP | 37 |
| 4 | CSMD2     | uc001bxm.1  | Missense_Mutation | SNP | 37 |
| 4 | ADAMTS18  | uc002ffc.4  | Missense_Mutation | SNP | 37 |
| 4 | LOC389831 | uc003woj.2  | 5'UTR             | SNP | 37 |
| 4 | GABBR1    | uc003nmt.4  | Silent            | SNP | 37 |
| 4 | CDH9      | uc003jgs.1  | Missense_Mutation | SNP | 37 |
| 4 | BMP10     | uc002sez.1  | Missense_Mutation | SNP | 37 |
| 4 | APOL2     | uc011amm.2  | Intron            | SNP | 37 |
| 4 | KCNK10    | uc001xwm.3  | Missense_Mutation | SNP | 37 |
| 4 | SIX4      | uc001xfc.3  | 3'UTR             | SNP | 37 |
| 4 | SPATC1    | uc011lkw.2  | Silent            | SNP | 37 |
| 4 | GAB4      | uc002zlw.3  | Missense_Mutation | SNP | 37 |
| 4 | ZMYM4     | uc001byt.3  | Missense_Mutation | SNP | 37 |
| 4 | CATSPERD  | uc002mda.3  | Missense_Mutation | SNP | 37 |
| 4 | PTCHD2    | uc001ash.4  | Missense_Mutation | SNP | 37 |
| 4 | GAB4      | uc002zlw.3  | Missense_Mutation | SNP | 37 |
| 4 | POGZ      | uc001eyd.2  | Silent            | SNP | 37 |
| 4 | RGAG1     | uc004eor.2  | Silent            | SNP | 37 |
| 4 | HOXD9     | uc010zex.2  | 3'UTR             | SNP | 37 |
| 4 | GLG1      | uc002fcx.3  | Missense_Mutation | SNP | 37 |



|   |           |            |                   |     |    |
|---|-----------|------------|-------------------|-----|----|
| 4 | FHDC1     | uc003inf.2 | Missense_Mutation | SNP | 37 |
| 4 | YLPM1     | uc001xqj.4 | Missense_Mutation | SNP | 37 |
| 4 | ZNF324    | uc002qsw.2 | Missense_Mutation | SNP | 37 |
| 4 | RBM46     | uc003ioo.3 | Silent            | SNP | 37 |
| 4 | ATHL1     | uc010qvu.2 | Silent            | SNP | 37 |
| 4 | NUP43     | uc003qmz.3 | Nonsense_Mutation | SNP | 37 |
| 4 | ZNF804A   | uc002uph.3 | Missense_Mutation | SNP | 37 |
| 4 | KCNB2     | uc003xzb.3 | Missense_Mutation | SNP | 37 |
| 4 | CALCR     | uc003umv.2 | Missense_Mutation | SNP | 37 |
| 4 | ABCA13    | uc003toq.2 | Silent            | SNP | 37 |
| 4 | BOLL      | uc002uut.2 | Missense_Mutation | SNP | 37 |
| 4 | RARS2     | uc003pme.3 | Silent            | SNP | 37 |
| 4 | COL28A1   | uc003src.1 | Missense_Mutation | SNP | 37 |
| 4 | EGFR      | uc003tqj.3 | 3'UTR             | SNP | 37 |
| 4 | ARHGAP29  | uc001dqj.4 | Missense_Mutation | SNP | 37 |
| 4 | RPS24     | uc001jzs.3 | Intron            | SNP | 37 |
| 4 | PCDHGC5   | uc003ljw.2 | Missense_Mutation | SNP | 37 |
| 4 | WFDC11    | uc002xpa.3 | Splice_Site       | SNP | 37 |
| 4 | ZNF462    | uc004bcz.3 | Silent            | SNP | 37 |
| 4 | ZNF211    | uc002qpr.2 | Missense_Mutation | SNP | 37 |
| 4 | AQP8      | uc002doc.3 | Missense_Mutation | SNP | 37 |
| 4 | CGNL1     | uc010bfw.3 | Silent            | SNP | 37 |
| 4 | OR5D14    | uc010rim.2 | Silent            | SNP | 37 |
| 4 | VPS13A    | uc004akr.3 | Missense_Mutation | SNP | 37 |
| 4 | AKAP11    | uc001uys.2 | Missense_Mutation | SNP | 37 |
| 4 | SLITRK1   | uc001vlk.3 | Missense_Mutation | SNP | 37 |
| 4 | CACNA1A   | uc010xne.2 | Missense_Mutation | SNP | 37 |
| 4 | SHPRH     | uc003qlf.3 | Missense_Mutation | SNP | 37 |
| 4 | AMY2B     | uc001dur.3 | 5'UTR             | SNP | 37 |
| 4 | DNAJB3    | uc002vuz.3 | Silent            | SNP | 37 |
| 4 | LRRC37A6P | uc001its.2 | Missense_Mutation | SNP | 37 |
| 4 | C8orf4    | uc003xnq.2 | Missense_Mutation | SNP | 37 |
| 4 | PEX5      | uc010sgd.2 | Missense_Mutation | SNP | 37 |
| 4 | CSAD      | uc010snx.2 | Silent            | SNP | 37 |
| 4 | C19orf21  | uc002lpo.3 | Silent            | SNP | 37 |
| 4 | NXPH4     | uc010srf.2 | Missense_Mutation | SNP | 37 |
| 4 | MYLK4     | uc003mty.4 | Silent            | SNP | 37 |
| 4 | CSMD3     | uc003ynu.3 | Silent            | SNP | 37 |
| 4 | OR51B6    | uc010qzb.2 | Silent            | SNP | 37 |
| 4 | SLC15A2   | uc003eep.2 | Missense_Mutation | SNP | 37 |
| 4 | BMP5      | uc003pcq.3 | Missense_Mutation | SNP | 37 |
| 4 | RPSAP52   | uc001sso.3 | Silent            | SNP | 37 |
| 4 | SULT2A1   | uc002phr.2 | Missense_Mutation | SNP | 37 |

|   |          |            |                   |     |    |
|---|----------|------------|-------------------|-----|----|
| 4 | C7orf29  | uc003wgy.3 | Silent            | SNP | 37 |
| 4 | LEFTY1   | uc001hpo.3 | Missense_Mutation | SNP | 37 |
| 4 | BNC1     | uc002bjt.1 | Missense_Mutation | SNP | 37 |
| 4 | PDE1A    | uc002uog.1 | Missense_Mutation | SNP | 37 |
| 4 | SLC13A1  | uc003vkm.3 | 3'UTR             | SNP | 37 |
| 4 | SLC9B2   | uc003hwx.4 | Silent            | SNP | 37 |
| 4 | EPHX3    | uc002nap.3 | 3'UTR             | SNP | 37 |
| 4 | OR51V1   | uc010qyz.2 | Silent            | SNP | 37 |
| 4 | NLRP13   | uc010ygg.2 | Silent            | SNP | 37 |
| 4 | VARS2    | uc010jsh.2 | 5'UTR             | SNP | 37 |
| 4 | UGT2B10  | uc003hee.3 | Silent            | SNP | 37 |
| 4 | RNF128   | uc004eml.3 | Silent            | SNP | 37 |
| 4 | GZMB     | uc001wps.2 | Missense_Mutation | SNP | 37 |
| 4 | ADRA1A   | uc003xfc.1 | Silent            | SNP | 37 |
| 4 | KIAA1109 | uc003iek.2 | 3'UTR             | SNP | 37 |
| 4 | GRHL3    | uc021oiw.1 | Splice_Site       | SNP | 37 |
| 4 | ZNF280A  | uc002zwe.3 | Missense_Mutation | SNP | 37 |
| 4 | TMTC1    | uc001rjc.1 | Missense_Mutation | SNP | 37 |
| 4 | C17orf70 | uc002kaq.3 | Missense_Mutation | SNP | 37 |
| 4 | ZNF93    | uc002non.3 | Silent            | SNP | 37 |
| 4 | IDO2     | uc010lwy.1 | Missense_Mutation | SNP | 37 |
| 4 | BHLHB9   | uc010nog.3 | Missense_Mutation | SNP | 37 |
| 4 | RGS12    | uc003ggv.3 | 3'UTR             | SNP | 37 |
| 4 | GABRA6   | uc003lyu.2 | Silent            | SNP | 37 |
| 4 | IL1R1    | uc002tbq.3 | Intron            | SNP | 37 |
| 4 | DNASE1L3 | uc003djo.1 | Missense_Mutation | SNP | 37 |
| 4 | CORO2A   | uc004ayl.3 | Missense_Mutation | SNP | 37 |
| 4 | MGLL     | uc003ejw.3 | Silent            | SNP | 37 |
| 4 | BATF2    | uc001ocf.1 | Missense_Mutation | SNP | 37 |
| 4 | GIMAP2   | uc003who.3 | Missense_Mutation | SNP | 37 |
| 4 | KIAA0528 | uc010sit.2 | 3'UTR             | SNP | 37 |
| 4 | DNAH7    | uc002utj.4 | Missense_Mutation | SNP | 37 |
| 4 | TBC1D5   | uc010hev.3 | Missense_Mutation | SNP | 37 |
| 4 | DAB2IP   | uc004bln.3 | Silent            | SNP | 37 |
| 4 | HNRNPUL1 | uc002oqb.4 | Missense_Mutation | SNP | 37 |
| 4 | ZNF618   | uc004bib.1 | Missense_Mutation | SNP | 37 |
| 4 | USP5     | uc001qri.4 | Missense_Mutation | SNP | 37 |
| 4 | C3orf30  | uc003ecb.1 | Missense_Mutation | SNP | 37 |
| 4 | FAT4     | uc003ifj.4 | Missense_Mutation | SNP | 37 |
| 4 | ZNF638   | uc002shx.3 | Missense_Mutation | SNP | 37 |
| 4 | PAPPA2   | uc001gkz.3 | Silent            | SNP | 37 |
| 4 | LRRN1    | uc003bpt.4 | 5'UTR             | SNP | 37 |
| 4 | SPTA1    | uc001fst.1 | Silent            | SNP | 37 |

|   |          |            |                   |     |    |
|---|----------|------------|-------------------|-----|----|
| 4 | DDC      | uc022adf.1 | Missense_Mutation | SNP | 37 |
| 4 | FYCO1    | uc011bal.1 | Nonsense_Mutation | SNP | 37 |
| 4 | CECR2    | uc010gqw.1 | Missense_Mutation | SNP | 37 |
| 4 | TRIM22   | uc001mbr.3 | Missense_Mutation | SNP | 37 |
| 4 | C4B      | uc011doy.2 | Missense_Mutation | SNP | 37 |
| 4 | TLL1     | uc011cjn.2 | Silent            | SNP | 37 |
| 4 | CCDC170  | uc003qol.3 | Missense_Mutation | SNP | 37 |
| 4 | ZBTB2    | uc003qoh.3 | Silent            | SNP | 37 |
| 4 | ZNF280A  | uc002zwe.3 | Nonsense_Mutation | SNP | 37 |
| 4 | PML      | uc002awv.3 | Silent            | SNP | 37 |
| 4 | LRRC16B  | uc001wlj.2 | Silent            | SNP | 37 |
| 4 | ZNF536   | uc002nsu.1 | Missense_Mutation | SNP | 37 |
| 4 | PPP2R3B  | uc004cpf.3 | 5'UTR             | SNP | 37 |
| 4 | FCGR3A   | uc001gar.3 | 3'UTR             | SNP | 37 |
| 4 | TC2N     | uc001xzu.4 | Missense_Mutation | SNP | 37 |
| 4 | CHD8     | uc001war.2 | Missense_Mutation | SNP | 37 |
| 4 | ZNF737   | uc002npa.3 | 5'UTR             | SNP | 37 |
| 4 | OR2F2    | uc011ktv.2 | Silent            | SNP | 37 |
| 4 | CYP2C19  | uc010qnz.2 | Silent            | SNP | 37 |
| 4 | XYLT1    | uc002dfa.3 | Missense_Mutation | SNP | 37 |
| 4 | WSCD2    | uc001tms.3 | Missense_Mutation | SNP | 37 |
| 4 | ATP6V0A4 | uc003vuf.3 | 5'UTR             | SNP | 37 |
| 4 | PTGER3   | uc001dfg.1 | Intron            | SNP | 37 |
| 4 | CSMD1    | uc022aqr.1 | Missense_Mutation | SNP | 37 |
| 4 | DGKB     | uc003ssz.3 | Missense_Mutation | SNP | 37 |
| 4 | UCKL1    | uc010gkn.3 | Silent            | SNP | 37 |
| 4 | ANKRD30B | uc010dlo.2 | Missense_Mutation | SNP | 37 |
| 4 | HDGFL1   | uc003nds.3 | Silent            | SNP | 37 |
| 4 | CAPN13   | uc021vfn.1 | Silent            | SNP | 37 |
| 4 | MMAB     | uc001tou.3 | Missense_Mutation | SNP | 37 |
| 4 | DCHS1    | uc001mem.1 | Missense_Mutation | SNP | 37 |
| 4 | UVSSA    | uc003gde.4 | Missense_Mutation | SNP | 37 |
| 4 | IL36RN   | uc002tis.3 | Missense_Mutation | SNP | 37 |
| 4 | MUC17    | uc003uxp.1 | Silent            | SNP | 37 |
| 4 | ECE2     | uc011brg.1 | 3'UTR             | SNP | 37 |
| 4 | DSCAM    | uc002yyq.1 | Missense_Mutation | SNP | 37 |
| 4 | FTMT     | uc003kss.3 | Silent            | SNP | 37 |
| 4 | EVPL     | uc010wst.1 | 5'UTR             | SNP | 37 |
| 4 | CTAGE11P | uc010ths.2 | 3'UTR             | SNP | 37 |
| 4 | SLC22A10 | uc009yor.3 | 3'UTR             | SNP | 37 |
| 4 | ADAMTS20 | uc010skx.2 | Missense_Mutation | SNP | 37 |
| 4 | OR6C1    | uc010spi.2 | Nonsense_Mutation | SNP | 37 |
| 4 | SLC5A12  | uc001mra.2 | Missense_Mutation | SNP | 37 |

|   |           |            |                       |     |    |
|---|-----------|------------|-----------------------|-----|----|
| 4 | C14orf129 | uc001yjf.4 | Missense_Mutation     | SNP | 37 |
| 4 | NEB       | uc002txu.3 | Missense_Mutation     | SNP | 37 |
| 4 | NFRKB     | uc001qfg.3 | Missense_Mutation     | SNP | 37 |
| 4 | MUSK      | uc022blv.1 | Splice_Site           | SNP | 37 |
| 4 | C1orf173  | uc001dgg.3 | Missense_Mutation     | SNP | 37 |
| 4 | HMX2      | uc001lhc.1 | Missense_Mutation     | SNP | 37 |
| 4 | AGL       | uc001dsi.1 | Silent                | SNP | 37 |
| 4 | PLK1      | uc002dlz.1 | Missense_Mutation     | SNP | 37 |
| 4 | SDPR      | uc002utb.3 | Silent                | SNP | 37 |
| 4 | PLXND1    | uc003emx.2 | Missense_Mutation     | SNP | 37 |
| 4 | USP47     | uc001mjs.3 | Missense_Mutation     | SNP | 37 |
| 4 | C14orf105 | uc010trl.1 | Nonsense_Mutation     | SNP | 37 |
| 4 | FRMPD2    | uc001jgi.3 | Silent                | SNP | 37 |
| 4 | LYPD6     | uc021vqt.1 | Missense_Mutation     | SNP | 37 |
| 4 | CSNK2A1   | uc001mjp.3 | Silent                | SNP | 37 |
| 4 | NFS1      | uc002xdw.2 | Silent                | SNP | 37 |
| 4 | XIRP2     | uc002udx.3 | Missense_Mutation     | SNP | 37 |
| 4 | CNTN4     | uc003bpc.3 | Missense_Mutation     | SNP | 37 |
| 4 | USP53     | uc003ict.3 | 3'UTR                 | SNP | 37 |
| 4 | ZNF831    | uc002yan.3 | Silent                | SNP | 37 |
| 4 | RPL11     | uc001bhk.3 | Intron                | SNP | 37 |
| 4 | DAB2IP    | uc004bln.3 | Missense_Mutation     | SNP | 37 |
| 4 | TAGAP     | uc003qzr.3 | Missense_Mutation     | SNP | 37 |
| 4 | PHF2P1    | uc001umb.1 | Non-coding_Transcript | SNP | 37 |
| 4 | LOC728875 | uc001ekz.4 | Splice_Site           | SNP | 37 |
| 4 | TMEM119   | uc001tng.3 | Missense_Mutation     | SNP | 37 |
| 4 | SLC3A1    | uc002ruc.4 | Missense_Mutation     | SNP | 37 |
| 4 | PRAMEF11  | uc001auk.2 | 5'UTR                 | SNP | 37 |
| 4 | abParts   | uc021wml.1 | Non-coding_Transcript | SNP | 37 |
| 4 | ACTA2     | uc001kfp.3 | Splice_Site           | SNP | 37 |
| 4 | PRKACA    | uc002myd.3 | Missense_Mutation     | SNP | 37 |
| 4 | AOAH      | uc022abu.1 | Missense_Mutation     | SNP | 37 |
| 4 | PGM2      | uc011byb.1 | Missense_Mutation     | SNP | 37 |
| 4 | BMP8B     | uc001cdz.1 | Missense_Mutation     | SNP | 37 |
| 4 | BTC       | uc003hig.2 | Missense_Mutation     | SNP | 37 |
| 4 | NLGN4X    | uc010ndi.3 | Silent                | SNP | 37 |
| 4 | PIGR      | uc001hez.3 | Silent                | SNP | 37 |
| 4 | ILDR2     | uc001gdx.2 | Missense_Mutation     | SNP | 37 |
| 4 | DOCK1     | uc010qun.2 | Silent                | SNP | 37 |
| 4 | FGF21     | uc002pkn.1 | Missense_Mutation     | SNP | 37 |
| 4 | CACNB4    | uc002txy.3 | 5'UTR                 | SNP | 37 |
| 4 | USP29     | uc002qny.3 | Missense_Mutation     | SNP | 37 |
| 4 | KRT75     | uc001saj.2 | Missense_Mutation     | SNP | 37 |

|   |             |            |                   |     |    |
|---|-------------|------------|-------------------|-----|----|
| 4 | ADAMTS19    | uc003kvb.1 | Missense_Mutation | SNP | 37 |
| 4 | SYT7        | uc009ynr.3 | Missense_Mutation | SNP | 37 |
| 4 | HRNR        | uc001ezt.1 | Missense_Mutation | SNP | 37 |
| 4 | CHIA        | uc001eas.3 | Missense_Mutation | SNP | 37 |
| 4 | OR4C13      | uc010rhz.2 | Missense_Mutation | SNP | 37 |
| 4 | OVCH2       | uc010rbf.2 | Missense_Mutation | SNP | 37 |
| 4 | YSK4        | uc002tui.4 | Missense_Mutation | SNP | 37 |
| 4 | USP47       | uc001mjs.3 | Missense_Mutation | SNP | 37 |
| 4 | C15orf55    | uc010ucc.2 | Silent            | SNP | 37 |
| 4 | MEN1        | uc001obj.3 | Silent            | SNP | 37 |
| 4 | MYO6        | uc003pih.1 | 3'UTR             | SNP | 37 |
| 4 | FLT1        | uc001usd.3 | Missense_Mutation | SNP | 37 |
| 4 | TCEB3B      | uc002lcr.1 | Silent            | SNP | 37 |
| 4 | TEX2        | uc002jed.3 | Silent            | SNP | 37 |
| 4 | ZSCAN20     | uc001bxj.4 | Missense_Mutation | SNP | 37 |
| 4 | BAZ2B       | uc002uao.3 | 3'UTR             | SNP | 37 |
| 4 | KIAA0947    | uc003jdm.4 | Missense_Mutation | SNP | 37 |
| 4 | NRAS        | uc009wgu.3 | Missense_Mutation | SNP | 37 |
| 4 | DSC3        | uc002kwj.4 | Missense_Mutation | SNP | 37 |
| 4 | SBF1        | uc003blh.3 | Missense_Mutation | SNP | 37 |
| 4 | LIN7A       | uc001szj.1 | Nonsense_Mutation | SNP | 37 |
| 4 | AAACL3      | uc009vnn.1 | Missense_Mutation | SNP | 37 |
| 4 | NDUFS5      | uc001ccx.3 | Missense_Mutation | SNP | 37 |
| 4 | EPHB3       | uc003foz.3 | Silent            | SNP | 37 |
| 4 | DPYSL5      | uc002rhu.4 | Splice_Site       | SNP | 37 |
| 4 | SCAF11      | uc001rox.3 | Missense_Mutation | SNP | 37 |
| 4 | ERG         | uc011aem.1 | Silent            | SNP | 37 |
| 4 | FMO2        | uc001ghk.1 | Silent            | SNP | 37 |
| 4 | WDR88       | uc002nui.3 | Silent            | SNP | 37 |
| 4 | MTMR3       | uc003agv.4 | Missense_Mutation | SNP | 37 |
| 4 | FUT9        | uc003pop.4 | Missense_Mutation | SNP | 37 |
| 4 | TFDP1       | uc001vtw.3 | Missense_Mutation | SNP | 37 |
| 4 | ADH1B       | uc003hus.4 | 3'UTR             | SNP | 37 |
| 4 | KIAA0368    | uc004bfe.1 | Splice_Site       | SNP | 37 |
| 4 | AKAP11      | uc001uys.2 | Missense_Mutation | SNP | 37 |
| 4 | KCNV1       | uc003ynr.4 | Silent            | SNP | 37 |
| 4 | TGIF2LX     | uc004efe.3 | Missense_Mutation | SNP | 37 |
| 4 | MUC3A       | uc003uxl.1 | Silent            | SNP | 37 |
| 4 | ZNF90       | uc002nor.2 | Missense_Mutation | SNP | 37 |
| 4 | KIR3DX1     | uc010erm.2 | 5'Flank           | SNP | 37 |
| 4 | KIFAP3      | uc001ggv.3 | 5'UTR             | SNP | 37 |
| 4 | CACNA2D4    | uc021qxs.1 | Nonsense_Mutation | SNP | 37 |
| 4 | FPGT-TNNI3K | uc001dge.2 | Missense_Mutation | SNP | 37 |

|   |          |            |                   |     |    |
|---|----------|------------|-------------------|-----|----|
| 4 | MUC16    | uc002mkp.3 | Missense_Mutation | SNP | 37 |
| 4 | ANKRD30A | uc021ppc.1 | Missense_Mutation | SNP | 37 |
| 4 | TRBV2    | uc011kro.1 | Intron            | SNP | 37 |
| 4 | CLCN4    | uc004csy.4 | Missense_Mutation | SNP | 37 |
| 4 | LCTL     | uc002aqc.3 | Missense_Mutation | SNP | 37 |
| 4 | ARHGEF2  | uc001fmu.2 | Missense_Mutation | SNP | 37 |
| 4 | KSR2     | uc001two.2 | Silent            | SNP | 37 |
| 4 | ECEL1    | uc002vsv.2 | Silent            | SNP | 37 |
| 4 | MBOAT7   | uc002qdq.3 | Silent            | SNP | 37 |
| 4 | DISP2    | uc001zlk.1 | Missense_Mutation | SNP | 37 |
| 4 | RTEL1    | uc021wge.1 | Silent            | SNP | 37 |
| 4 | IGLL5    | uc021wmq.1 | Silent            | SNP | 37 |
| 4 | MAEL     | uc001gdy.1 | Missense_Mutation | SNP | 37 |
| 4 | UBR1     | uc001zqq.3 | 3'UTR             | SNP | 37 |
| 4 | SORL1    | uc001pxx.3 | Missense_Mutation | SNP | 37 |
| 4 | CNTNAP3  | uc004abi.3 | Missense_Mutation | SNP | 37 |
| 4 | MAGEB6   | uc004dbr.3 | Nonsense_Mutation | SNP | 37 |
| 4 | FSTL5    | uc003iqh.3 | Missense_Mutation | SNP | 37 |
| 4 | SCMH1    | uc001cgo.3 | Nonsense_Mutation | SNP | 37 |
| 4 | PDE7B    | uc003qgr.3 | Missense_Mutation | SNP | 37 |
| 4 | CLIP4    | uc002rmv.3 | Missense_Mutation | SNP | 37 |
| 4 | CD1E     | uc001fse.3 | Missense_Mutation | SNP | 37 |
| 4 | DAPK1    | uc004apc.3 | Silent            | SNP | 37 |
| 4 | THBS4    | uc021yaw.1 | Silent            | SNP | 37 |
| 4 | IL1RL1   | uc002tbu.1 | Silent            | SNP | 37 |
| 4 | EML2     | uc010xxm.2 | Splice_Site       | SNP | 37 |
| 4 | SUPT16H  | uc001wao.2 | Silent            | SNP | 37 |
| 4 | SZT2     | uc001cjk.2 | Missense_Mutation | SNP | 37 |
| 4 | KIAA1958 | uc011lwx.1 | Silent            | SNP | 37 |
| 4 | NOVA1    | uc001wpy.3 | Silent            | SNP | 37 |
| 4 | KIAA0564 | uc001uyj.3 | Missense_Mutation | SNP | 37 |
| 4 | PREX2    | uc003xxv.1 | Silent            | SNP | 37 |
| 4 | EPS8L1   | uc002qis.4 | Silent            | SNP | 37 |
| 4 | TTN      | uc021vsy.1 | Missense_Mutation | SNP | 37 |
| 4 | DNAH7    | uc002utj.4 | Nonsense_Mutation | SNP | 37 |
| 4 | INSC     | uc001mly.3 | Missense_Mutation | SNP | 37 |
| 4 | AHNAK2   | uc010axc.1 | Missense_Mutation | SNP | 37 |
| 4 | abParts  | uc001yuj.2 | Intron            | SNP | 37 |
| 4 | FAAH2    | uc004dvc.3 | Silent            | SNP | 37 |
| 4 | MX2      | uc002yzf.1 | Silent            | SNP | 37 |
| 4 | FRY      | uc001utx.3 | Missense_Mutation | SNP | 37 |
| 4 | PAPD7    | uc003jdx.1 | Missense_Mutation | SNP | 37 |
| 4 | NUDCD1   | uc003ynb.4 | Missense_Mutation | SNP | 37 |

|   |           |            |                       |     |    |
|---|-----------|------------|-----------------------|-----|----|
| 4 | MAPK8     | uc001jgn.3 | Splice_Site           | SNP | 37 |
| 4 | SLC4A8    | uc001rys.1 | Silent                | SNP | 37 |
| 4 | EYA1      | uc003xys.4 | Silent                | SNP | 37 |
| 4 | IFNA17    | uc003zos.1 | 3'UTR                 | SNP | 37 |
| 4 | FILIP1    | uc010kbe.3 | Missense_Mutation     | SNP | 37 |
| 4 | SLC25A23  | uc002mex.1 | Silent                | SNP | 37 |
| 4 | MAP1S     | uc002nhe.1 | Silent                | SNP | 37 |
| 4 | C2orf16   | uc002rkz.4 | Missense_Mutation     | SNP | 37 |
| 4 | PLD1      | uc003fhs.3 | Missense_Mutation     | SNP | 37 |
| 4 | LDB1      | uc001kul.3 | 3'UTR                 | SNP | 37 |
| 4 | ZNF585A   | uc002of0.1 | Missense_Mutation     | SNP | 37 |
| 4 | ERCC4     | uc002dce.2 | Silent                | SNP | 37 |
| 4 | PCSK5     | uc004akc.2 | Missense_Mutation     | SNP | 37 |
| 4 | OR5K3     | uc011bgw.2 | Silent                | SNP | 37 |
| 4 | SMCHD1    | uc002klm.4 | Missense_Mutation     | SNP | 37 |
| 4 | PHF2      | uc004aub.3 | Silent                | SNP | 37 |
| 4 | CHAF1A    | uc002mal.3 | Silent                | SNP | 37 |
| 4 | MRGPRE    | uc001lxq.4 | Silent                | SNP | 37 |
| 4 | NR1D2     | uc003ccs.2 | Missense_Mutation     | SNP | 37 |
| 4 | CFH       | uc001gtj.4 | Missense_Mutation     | SNP | 37 |
| 4 | TKTL2     | uc003iqp.4 | Missense_Mutation     | SNP | 37 |
| 4 | SSX2IP    | uc001dkh.3 | Silent                | SNP | 37 |
| 4 | C8B       | uc001cyp.3 | 5'UTR                 | SNP | 37 |
| 4 | MAGEA10   | uc004ffk.3 | Missense_Mutation     | SNP | 37 |
| 4 | PCDHB9    | uc003liw.1 | Missense_Mutation     | SNP | 37 |
| 4 | DONSON    | uc002ytl.3 | 5'UTR                 | SNP | 37 |
| 4 | GTF3C5    | uc004ccj.4 | Silent                | SNP | 37 |
| 4 | PRSS38    | uc001hrh.3 | Silent                | SNP | 37 |
| 4 | TTC14     | uc003fkk.3 | Missense_Mutation     | SNP | 37 |
| 4 | A2M       | uc001qvk.1 | Missense_Mutation     | SNP | 37 |
| 4 | LOC729020 | uc009xxi.2 | Missense_Mutation     | SNP | 37 |
| 4 | PSRC1     | uc001dxj.3 | Missense_Mutation     | SNP | 37 |
| 4 | SSPO      | uc010lpk.3 | Missense_Mutation     | SNP | 37 |
| 4 | CEACAM19  | uc002ozo.4 | Missense_Mutation     | SNP | 37 |
| 4 | PRAMEF11  | uc001auk.2 | Missense_Mutation     | SNP | 37 |
| 4 | BAGE      | uc002yit.1 | 3'UTR                 | SNP | 37 |
| 4 | C11orf58  | uc001mmk.2 | Missense_Mutation     | SNP | 37 |
| 4 | GALNTL6   | uc003isv.3 | Missense_Mutation     | SNP | 37 |
| 4 | CEACAM5   | uc002orl.3 | Silent                | SNP | 37 |
| 4 | AK310441  | uc009wkv.1 | Non-coding_Transcript | SNP | 37 |
| 4 | LEMD3     | uc001ssl.2 | Missense_Mutation     | SNP | 37 |
| 4 | TRPM6     | uc004ajl.1 | Missense_Mutation     | SNP | 37 |
| 4 | RP1       | uc003xsd.1 | Missense_Mutation     | SNP | 37 |

|   |           |            |                   |     |    |
|---|-----------|------------|-------------------|-----|----|
| 4 | OR10G4    | uc010sac.2 | Missense_Mutation | SNP | 37 |
| 4 | MSL3P1    | uc010znf.2 | Missense_Mutation | SNP | 37 |
| 4 | MOV10L1   | uc003bjj.3 | Missense_Mutation | SNP | 37 |
| 4 | HTT       | uc021xkv.1 | Missense_Mutation | SNP | 37 |
| 4 | HSD3B2    | uc001ehu.3 | 3'UTR             | SNP | 37 |
| 4 | COL2A1    | uc001rqu.3 | Silent            | SNP | 37 |
| 4 | EPPK1     | uc003zaa.1 | Silent            | SNP | 37 |
| 4 | CCT8L2    | uc002zlp.1 | Missense_Mutation | SNP | 37 |
| 4 | C14orf79  | uc001ypy.1 | Silent            | SNP | 37 |
| 4 | MRPL21    | uc010rqe.1 | Silent            | SNP | 37 |
| 4 | PSG4      | uc002ovg.1 | Missense_Mutation | SNP | 37 |
| 4 | MUC16     | uc002mkp.3 | Missense_Mutation | SNP | 37 |
| 4 | MSH6      | uc002rwd.4 | Silent            | SNP | 37 |
| 4 | ELFN2     | uc003asq.4 | Silent            | SNP | 37 |
| 4 | ANK3      | uc001jky.3 | Missense_Mutation | SNP | 37 |
| 4 | DNMT3A    | uc002rgc.3 | Missense_Mutation | SNP | 37 |
| 4 | OR1F1     | uc010uwu.2 | Missense_Mutation | SNP | 37 |
| 4 | RNF40     | uc002dzq.3 | Missense_Mutation | SNP | 37 |
| 4 | ZNF589    | uc003csl.4 | Silent            | SNP | 37 |
| 4 | SPO11     | uc002xye.3 | Missense_Mutation | SNP | 37 |
| 4 | NID1      | uc001hxo.3 | Missense_Mutation | SNP | 37 |
| 4 | POF1B     | uc004ees.3 | Missense_Mutation | SNP | 37 |
| 4 | SIGLEC10  | uc010eow.3 | Missense_Mutation | SNP | 37 |
| 4 | RPGRIP1   | uc001wag.3 | Silent            | SNP | 37 |
| 4 | KRTAP5-9  | uc001oqs.1 | Missense_Mutation | SNP | 37 |
| 4 | NRXN1     | uc021vhg.1 | Silent            | SNP | 37 |
| 4 | WDR36     | uc003kpd.3 | Missense_Mutation | SNP | 37 |
| 4 | TAGAP     | uc003qzr.3 | Missense_Mutation | SNP | 37 |
| 4 | PPARGC1B  | uc003lrc.3 | Missense_Mutation | SNP | 37 |
| 4 | NMUR2     | uc003luv.2 | Missense_Mutation | SNP | 37 |
| 4 | MAB21L3   | uc001egc.1 | 3'UTR             | SNP | 37 |
| 4 | WDR1      | uc021xlv.1 | Silent            | SNP | 37 |
| 4 | KCNK2     | uc001hmq.3 | Silent            | SNP | 37 |
| 4 | DSCAM     | uc002yyq.1 | Missense_Mutation | SNP | 37 |
| 4 | ARHGEF10L | uc001ban.3 | Missense_Mutation | SNP | 37 |
| 4 | TMEM219   | uc002duw.2 | 5'UTR             | SNP | 37 |
| 4 | LTBP2     | uc001xqa.3 | Silent            | SNP | 37 |
| 4 | C20orf151 | uc002ycw.2 | Splice_Site       | SNP | 37 |
| 4 | C1orf168  | uc001cym.4 | Missense_Mutation | SNP | 37 |
| 4 | UNC119    | uc002hbm.2 | 3'UTR             | SNP | 37 |
| 4 | SLIT1     | uc001kmw.2 | Missense_Mutation | SNP | 37 |
| 4 | abParts   | uc021ser.1 | Splice_Site       | SNP | 37 |
| 4 | METTL19   | uc003glg.2 | Silent            | SNP | 37 |



|   |          |            |                   |     |    |
|---|----------|------------|-------------------|-----|----|
| 4 | TCP10    | uc003qvv.1 | Silent            | SNP | 37 |
| 4 | CELA2A   | uc001awk.3 | Nonsense_Mutation | SNP | 37 |
| 4 | ZNF32    | uc001jbb.3 | Silent            | SNP | 37 |
| 4 | KRT14    | uc002hxf.2 | Missense_Mutation | SNP | 37 |
| 4 | C4B      | uc011doy.2 | Silent            | SNP | 37 |
| 4 | TBC1D24  | uc002cql.3 | Silent            | SNP | 37 |
| 4 | NVL      | uc001hok.3 | Missense_Mutation | SNP | 37 |
| 4 | PAX3     | uc002vmt.2 | Missense_Mutation | SNP | 37 |
| 4 | TRPA1    | uc003xza.3 | Silent            | SNP | 37 |
| 4 | CERS3    | uc002bwa.3 | Missense_Mutation | SNP | 37 |
| 4 | DAZL     | uc003cba.3 | Missense_Mutation | SNP | 37 |
| 4 | MME      | uc010hvr.1 | Silent            | SNP | 37 |
| 4 | KCNV1    | uc003ynr.4 | Silent            | SNP | 37 |
| 4 | ZNF362   | uc001bxc.1 | 5'UTR             | SNP | 37 |
| 4 | CCKBR    | uc001mcs.3 | Missense_Mutation | SNP | 37 |
| 4 | PACRGL   | uc010iei.1 | Missense_Mutation | SNP | 37 |
| 4 | AMY2B    | uc010ouo.2 | Missense_Mutation | SNP | 37 |
| 4 | DDX55    | uc001ufk.3 | 5'UTR             | SNP | 37 |
| 4 | CR2      | uc001hfv.3 | Silent            | SNP | 37 |
| 4 | TRIM15   | uc010jrx.3 | Silent            | SNP | 37 |
| 4 | GRIN2B   | uc001rbt.2 | Silent            | SNP | 37 |
| 4 | abParts  | uc021ser.1 | Splice_Site       | SNP | 37 |
| 4 | RP1L1    | uc003wtc.3 | 5'UTR             | SNP | 37 |
| 4 | NKTR     | uc003clo.3 | Missense_Mutation | SNP | 37 |
| 4 | PFKP     | uc009xhu.3 | 5'UTR             | SNP | 37 |
| 4 | C2orf16  | uc002rkz.4 | Missense_Mutation | SNP | 37 |
| 4 | ASXL3    | uc010dmg.1 | Missense_Mutation | SNP | 37 |
| 4 | SPRR2G   | uc009wod.2 | Missense_Mutation | SNP | 37 |
| 4 | RNF152   | uc002lih.1 | Silent            | SNP | 37 |
| 4 | PFDN4    | uc002xwx.3 | 5'UTR             | SNP | 37 |
| 4 | WDR19    | uc003gtv.3 | Silent            | SNP | 37 |
| 4 | RTN4     | uc002rye.3 | Missense_Mutation | SNP | 37 |
| 4 | RBM42    | uc010xsx.2 | 3'UTR             | SNP | 37 |
| 4 | MUC16    | uc002mkp.3 | Missense_Mutation | SNP | 37 |
| 4 | RRM2     | uc021vdr.1 | Silent            | SNP | 37 |
| 4 | SLC22A7  | uc021yzt.1 | 3'UTR             | SNP | 37 |
| 4 | COL5A3   | uc002mmq.1 | Splice_Site       | SNP | 37 |
| 4 | COL4A3   | uc002vom.2 | Missense_Mutation | SNP | 37 |
| 4 | SEMA6B   | uc010dud.2 | Splice_Site       | SNP | 37 |
| 4 | TXNDC17  | uc002gdf.4 | 5'UTR             | SNP | 37 |
| 4 | GTF2IRD2 | uc003ubd.1 | Silent            | SNP | 37 |
| 4 | ZMYND15  | uc002fyu.2 | Silent            | SNP | 37 |
| 4 | IQCH     | uc002aqo.2 | Missense_Mutation | SNP | 37 |

|   |          |            |                   |     |    |
|---|----------|------------|-------------------|-----|----|
| 4 | LINGO2   | uc010mjf.1 | Silent            | SNP | 37 |
| 4 | SH2D4B   | uc001kck.1 | Missense_Mutation | SNP | 37 |
| 4 | FAM151A  | uc001cxn.3 | Silent            | SNP | 37 |
| 4 | SDPR     | uc002utb.3 | 3'UTR             | SNP | 37 |
| 4 | SSB      | uc002ufk.3 | Missense_Mutation | SNP | 37 |
| 4 | SULT1E1  | uc010ihv.1 | Missense_Mutation | SNP | 37 |
| 4 | OR6C68   | uc010spo.2 | Silent            | SNP | 37 |
| 4 | LEFTY1   | uc001hpo.3 | Missense_Mutation | SNP | 37 |
| 4 | RAB27B   | uc002lfr.3 | Missense_Mutation | SNP | 37 |
| 4 | CASKIN1  | uc010bsg.1 | Missense_Mutation | SNP | 37 |
| 4 | ROS1     | uc003pxp.1 | Missense_Mutation | SNP | 37 |
| 4 | GTPBP10  | uc003ukm.2 | Missense_Mutation | SNP | 37 |
| 4 | GRID2    | uc011cdt.2 | Silent            | SNP | 37 |
| 4 | ZDHHC2   | uc003wx.3  | Missense_Mutation | SNP | 37 |
| 4 | NLGN4Y   | uc011nas.1 | Silent            | SNP | 37 |
| 4 | EPHX3    | uc002nap.3 | Silent            | SNP | 37 |
| 4 | COL4A4   | uc021v.1   | Silent            | SNP | 37 |
| 4 | MAGEB16  | uc010ngt.1 | Silent            | SNP | 37 |
| 4 | CPN2     | uc003fts.3 | Silent            | SNP | 37 |
| 4 | DLK2     | uc003ova.3 | Missense_Mutation | SNP | 37 |
| 4 | RFPL1    | uc003afn.3 | 5'Flank           | SNP | 37 |
| 4 | PAK6     | uc010bbl.3 | Missense_Mutation | SNP | 37 |
| 4 | ZNF16    | uc003zet.3 | Missense_Mutation | SNP | 37 |
| 4 | COL6A3   | uc002vwl.2 | Missense_Mutation | SNP | 37 |
| 4 | MTRF1    | uc010tff.2 | Missense_Mutation | SNP | 37 |
| 4 | PRSS58   | uc003vxb.3 | Missense_Mutation | SNP | 37 |
| 4 | C11orf88 | uc001plo.1 | 3'UTR             | SNP | 37 |
| 4 | PTCHD3   | uc001itu.2 | Silent            | SNP | 37 |
| 4 | CCM2     | uc003tms.3 | Missense_Mutation | SNP | 37 |
| 4 | ADAM32   | uc003xmt.4 | Missense_Mutation | SNP | 37 |
| 4 | RGPD4    | uc010ywk.2 | Missense_Mutation | SNP | 37 |
| 4 | GPR161   | uc010pln.2 | Silent            | SNP | 37 |
| 4 | SETD1A   | uc002ead.1 | 3'UTR             | SNP | 37 |
| 4 | CARS     | uc001lxf.3 | Silent            | SNP | 37 |
| 4 | CALHM1   | uc001kxe.2 | Silent            | SNP | 37 |
| 4 | CDC42BPG | uc001obs.4 | Missense_Mutation | SNP | 37 |
| 4 | ARSD     | uc004cqy.3 | Missense_Mutation | SNP | 37 |
| 4 | SPTA1    | uc001fst.1 | Missense_Mutation | SNP | 37 |
| 4 | CACNA1C  | uc009zdu.1 | Nonsense_Mutation | SNP | 37 |
| 4 | CCBE1    | uc002lib.3 | Missense_Mutation | SNP | 37 |
| 4 | HLA-DQA1 | uc003obr.3 | Missense_Mutation | SNP | 37 |
| 4 | VN1R4    | uc010ydu.2 | Silent            | SNP | 37 |
| 4 | COL6A6   | uc010htl.3 | Missense_Mutation | SNP | 37 |

|   |            |            |                       |     |    |
|---|------------|------------|-----------------------|-----|----|
| 4 | SLC7A6     | uc002evt.2 | Silent                | SNP | 37 |
| 4 | TRPC5      | uc004epl.1 | Missense_Mutation     | SNP | 37 |
| 4 | SLC13A2    | uc010wan.2 | Missense_Mutation     | SNP | 37 |
| 4 | PSG4       | uc002ovy.3 | 5'UTR                 | SNP | 37 |
| 4 | FLT1       | uc001usd.3 | Missense_Mutation     | SNP | 37 |
| 4 | ZFP112     | uc010xxa.2 | Nonsense_Mutation     | SNP | 37 |
| 4 | NPY5R      | uc003iqn.3 | Missense_Mutation     | SNP | 37 |
| 4 | SLC9A3     | uc003jbe.2 | Missense_Mutation     | SNP | 37 |
| 4 | WBP11P1    | uc010dmc.3 | Non-coding_Transcript | SNP | 37 |
| 4 | RNF144A    | uc002qys.3 | Missense_Mutation     | SNP | 37 |
| 4 | GOLGA8IP   | uc001yvh.1 | Silent                | SNP | 37 |
| 4 | FAT4       | uc003ifj.4 | Silent                | SNP | 37 |
| 4 | ECI2       | uc003mwf.3 | Missense_Mutation     | SNP | 37 |
| 4 | SEMA4A     | uc001fnl.3 | Silent                | SNP | 37 |
| 4 | OR1L8      | uc004bmp.1 | Silent                | SNP | 37 |
| 4 | LRRC37A11P | uc002hrd.1 | Non-coding_Transcript | SNP | 37 |
| 4 | CYP4F3     | uc010xok.2 | Silent                | SNP | 37 |
| 4 | SURF6      | uc004cdb.4 | 3'UTR                 | SNP | 37 |
| 4 | CHD3       | uc002gjd.2 | Missense_Mutation     | SNP | 37 |
| 4 | FLG2       | uc001ezw.4 | Missense_Mutation     | SNP | 37 |
| 4 | ILDR2      | uc001gdx.2 | Silent                | SNP | 37 |
| 4 | LALBA      | uc001rrt.3 | Silent                | SNP | 37 |
| 4 | PNLIPRP3   | uc001lcl.4 | Missense_Mutation     | SNP | 37 |
| 4 | SCN9A      | uc010fpl.3 | Missense_Mutation     | SNP | 37 |
| 4 | MAPK15     | uc003yzj.3 | Missense_Mutation     | SNP | 37 |
| 4 | LILRP2     | uc002qgt.1 | Intron                | SNP | 37 |
| 4 | PCSK5      | uc004akc.2 | Missense_Mutation     | SNP | 37 |
| 4 | FOLR3      | uc001ory.1 | Missense_Mutation     | SNP | 37 |
| 4 | FBLN1      | uc003bgi.1 | Silent                | SNP | 37 |
| 4 | OR9Q1      | uc001nmj.3 | Missense_Mutation     | SNP | 37 |
| 4 | KLK2       | uc002ptv.3 | 3'UTR                 | SNP | 37 |
| 4 | PRF1       | uc009xqg.3 | Silent                | SNP | 37 |
| 4 | C3orf32    | uc003bqz.3 | Nonsense_Mutation     | SNP | 37 |
| 4 | SCD5       | uc003hnb.4 | Missense_Mutation     | SNP | 37 |
| 4 | SPATS2     | uc001rud.2 | Missense_Mutation     | SNP | 37 |
| 4 | GAB4       | uc002zlw.3 | Silent                | SNP | 37 |
| 4 | PURG       | uc003xin.3 | Missense_Mutation     | SNP | 37 |
| 4 | MKNK1      | uc001cqj.3 | Missense_Mutation     | SNP | 37 |
| 4 | LRP1       | uc001snd.3 | Silent                | SNP | 37 |
| 4 | MED14      | uc004dex.4 | Missense_Mutation     | SNP | 37 |
| 4 | NME9       | uc003esg.3 | Missense_Mutation     | SNP | 37 |
| 4 | MASTL      | uc001itm.3 | Missense_Mutation     | SNP | 37 |
| 4 | PDE6C      | uc001kiu.4 | 5'UTR                 | SNP | 37 |

|   |          |            |                   |     |    |
|---|----------|------------|-------------------|-----|----|
| 4 | C6       | uc003jmk.2 | Missense_Mutation | SNP | 37 |
| 4 | NOS3     | uc003wif.3 | Missense_Mutation | SNP | 37 |
| 4 | ASAP2    | uc002qzh.2 | Missense_Mutation | SNP | 37 |
| 4 | ANKRD30B | uc010dlo.2 | Missense_Mutation | SNP | 37 |
| 4 | SPAG1    | uc003yjh.2 | Nonsense_Mutation | SNP | 37 |
| 4 | MFSD1    | uc003fcl.2 | 3'UTR             | SNP | 37 |
| 4 | ATP6V0A4 | uc003vuf.3 | Silent            | SNP | 37 |
| 4 | TRAF3IP3 | uc001hho.3 | Silent            | SNP | 37 |
| 4 | RET      | uc001jal.3 | Silent            | SNP | 37 |
| 4 | ENTPD3   | uc003ckd.4 | Intron            | SNP | 37 |
| 4 | AFF2     | uc004fcp.3 | Missense_Mutation | SNP | 37 |
| 4 | SLC13A1  | uc003vkm.3 | Silent            | SNP | 37 |
| 4 | TSHZ2    | uc002xwo.3 | Missense_Mutation | SNP | 37 |
| 4 | SLCO1B3  | uc010sil.2 | Missense_Mutation | SNP | 37 |
| 4 | SCUBE2   | uc001mhi.2 | Silent            | SNP | 37 |
| 4 | C1orf173 | uc001dgg.3 | Silent            | SNP | 37 |
| 4 | ABI1     | uc001isx.3 | Missense_Mutation | SNP | 37 |
| 4 | RPTN     | uc001ezs.1 | Silent            | SNP | 37 |
| 4 | Unknown  |            | IGR               | SNP | 37 |
| 4 | MCHR2    | uc003pqh.1 | Silent            | SNP | 37 |
| 4 | LILRA4   | uc002qfj.3 | Missense_Mutation | SNP | 37 |
| 4 | DNAH5    | uc003jfd.2 | Silent            | SNP | 37 |
| 4 | PRB1     | uc001qzw.1 | Missense_Mutation | SNP | 37 |
| 4 | RAD54L2  | uc011bdt.2 | Missense_Mutation | SNP | 37 |
| 4 | CDH9     | uc003jgs.1 | Missense_Mutation | SNP | 37 |
| 4 | DDB1     | uc001nrc.4 | Missense_Mutation | SNP | 37 |
| 4 | EXOC8    | uc001huq.3 | Missense_Mutation | SNP | 37 |
| 4 | KIAA1257 | uc003elj.4 | Silent            | SNP | 37 |
| 4 | LRRC3B   | uc003cdp.3 | Silent            | SNP | 37 |
| 4 | TMEM86B  | uc002qju.3 | Missense_Mutation | SNP | 37 |
| 4 | GLIS3    | uc003zii.1 | Missense_Mutation | SNP | 37 |
| 4 | TP53BP2  | uc010pvb.2 | Missense_Mutation | SNP | 37 |
| 4 | PIK3C2B  | uc001haw.3 | Silent            | SNP | 37 |
| 4 | PKHD1L1  | uc003yne.3 | Missense_Mutation | SNP | 37 |
| 4 | COL5A1   | uc004cfe.3 | Silent            | SNP | 37 |
| 4 | MCTP2    | uc002btj.3 | Missense_Mutation | SNP | 37 |
| 4 | MED12    | uc004dyy.3 | Missense_Mutation | SNP | 37 |
| 4 | CFHR1    | uc001gtl.3 | Silent            | SNP | 37 |
| 4 | CCDC62   | uc001udc.3 | 3'UTR             | SNP | 37 |
| 4 | SCN11A   | uc021wvy.1 | Silent            | SNP | 37 |
| 4 | RYR1     | uc002oit.3 | Silent            | SNP | 37 |
| 4 | LIPI     | uc002yjm.3 | Splice_Site       | SNP | 37 |
| 4 | NACA     | uc021qze.1 | Silent            | SNP | 37 |

|   |            |            |                   |     |    |
|---|------------|------------|-------------------|-----|----|
| 4 | CATSPERB   | uc001xzs.1 | Silent            | SNP | 37 |
| 4 | GHSR       | uc003fib.2 | Missense_Mutation | SNP | 37 |
| 4 | PGM3       | uc011dyz.2 | Silent            | SNP | 37 |
| 4 | POU6F2     | uc003thb.2 | Missense_Mutation | SNP | 37 |
| 4 | UGGT2      | uc001vmt.3 | Missense_Mutation | SNP | 37 |
| 4 | SPATS2     | uc001rud.2 | Silent            | SNP | 37 |
| 4 | ZMYM4      | uc001byt.3 | Silent            | SNP | 37 |
| 4 | TNXB       | uc003nzl.2 | Missense_Mutation | SNP | 37 |
| 4 | SYNE1      | uc021zhb.1 | Missense_Mutation | SNP | 37 |
| 4 | TIAM1      | uc002yow.1 | Missense_Mutation | SNP | 37 |
| 4 | DNMT1      | uc002mnf.3 | 5'UTR             | SNP | 37 |
| 4 | MAGEB6     | uc004dbr.3 | Missense_Mutation | SNP | 37 |
| 4 | USP6       | uc002gau.1 | Nonsense_Mutation | SNP | 37 |
| 4 | DSG1       | uc002kwp.3 | Missense_Mutation | SNP | 37 |
| 4 | DNAH5      | uc003jfd.2 | Nonsense_Mutation | SNP | 37 |
| 4 | LY75-CD302 | uc002ubb.4 | Silent            | SNP | 37 |
| 4 | HEMGN      | uc004axy.3 | Missense_Mutation | SNP | 37 |
| 4 | ELAVL3     | uc002mry.1 | Silent            | SNP | 37 |
| 4 | IBA57      | uc001hsl.4 | Missense_Mutation | SNP | 37 |
| 4 | OR5AK2     | uc010rjp.2 | Silent            | SNP | 37 |
| 4 | NMUR2      | uc003luv.2 | 3'UTR             | SNP | 37 |
| 4 | OR2G2      | uc010ppy.2 | Missense_Mutation | SNP | 37 |
| 4 | ZNF28      | uc002qad.3 | Missense_Mutation | SNP | 37 |
| 4 | AGBL1      | uc002blz.1 | Missense_Mutation | SNP | 37 |
| 4 | TULP2      | uc002pkz.2 | Splice_Site       | SNP | 37 |
| 4 | PTGFR      | uc001din.3 | 3'UTR             | SNP | 37 |
| 4 | TCF21      | uc003qei.4 | 3'UTR             | SNP | 37 |
| 4 | HRASLS5    | uc001nwy.2 | 3'UTR             | SNP | 37 |
| 4 | RASGRF1    | uc002beq.3 | Missense_Mutation | SNP | 37 |
| 4 | CSMD3      | uc003ynu.3 | Missense_Mutation | SNP | 37 |
| 4 | HSPA2      | uc001xhj.3 | Missense_Mutation | SNP | 37 |
| 4 | INPP5F     | uc001leo.3 | Missense_Mutation | SNP | 37 |
| 4 | TCRBV5S2   | uc010lnz.1 | Missense_Mutation | SNP | 37 |
| 4 | LTN1       | uc002ymr.2 | Missense_Mutation | SNP | 37 |
| 4 | DCST1      | uc001fgn.2 | Silent            | SNP | 37 |
| 4 | CDC37      | uc002mof.1 | Missense_Mutation | SNP | 37 |
| 4 | MSRA       | uc003wsx.3 | Missense_Mutation | SNP | 37 |
| 4 | TNR        | uc001gkp.1 | Silent            | SNP | 37 |
| 4 | SPHKAP     | uc002vpq.2 | Silent            | SNP | 37 |
| 4 | MMP28      | uc002hgy.1 | Missense_Mutation | SNP | 37 |
| 4 | PIK3CG     | uc003vdv.4 | Missense_Mutation | SNP | 37 |
| 4 | MRGPRX2    | uc001mph.3 | Nonsense_Mutation | SNP | 37 |
| 4 | B3GNT3     | uc002nhl.1 | Silent            | SNP | 37 |

|   |            |            |                       |     |    |
|---|------------|------------|-----------------------|-----|----|
| 4 | FNDC1      | uc010kqv.3 | Silent                | SNP | 37 |
| 4 | FMNL2      | uc002tye.3 | Silent                | SNP | 37 |
| 4 | HIP1R      | uc001udj.1 | Silent                | SNP | 37 |
| 4 | NBEA       | uc021rid.1 | Nonsense_Mutation     | SNP | 37 |
| 4 | UGT2A3     | uc003hef.2 | Missense_Mutation     | SNP | 37 |
| 4 | DSG4       | uc002kwr.2 | Silent                | SNP | 37 |
| 4 | OR5B12     | uc010rkh.2 | Silent                | SNP | 37 |
| 4 | RNASET2    | uc003qvi.1 | 3'UTR                 | SNP | 37 |
| 4 | MGA        | uc010ucy.2 | Missense_Mutation     | SNP | 37 |
| 4 | CD163L1    | uc010sge.2 | Silent                | SNP | 37 |
| 4 | SFMBT1     | uc003dgf.3 | Missense_Mutation     | SNP | 37 |
| 4 | MSGN1      | uc010yjt.2 | Nonsense_Mutation     | SNP | 37 |
| 4 | RAD54L2    | uc003dbh.3 | Missense_Mutation     | SNP | 37 |
| 4 | AHNAK2     | uc010axc.1 | Silent                | SNP | 37 |
| 4 | LRRC7      | uc001dep.3 | Silent                | SNP | 37 |
| 4 | OR6C70     | uc010spn.2 | Missense_Mutation     | SNP | 37 |
| 4 | FBXO10     | uc004aac.3 | Silent                | SNP | 37 |
| 4 | IGHE       | uc001ysj.3 | Intron                | SNP | 37 |
| 4 | CLEC2L     | uc010lnd.3 | Missense_Mutation     | SNP | 37 |
| 4 | CYP1B1     | uc002rqq.2 | Silent                | SNP | 37 |
| 4 | FAN1       | uc001zff.3 | Silent                | SNP | 37 |
| 4 | RYR2       | uc001hyl.1 | Missense_Mutation     | SNP | 37 |
| 4 | P4HA2      | uc003kwh.3 | Missense_Mutation     | SNP | 37 |
| 4 | MYBPC3     | uc021qis.1 | Silent                | SNP | 37 |
| 4 | DCSTAMP    | uc003ylx.1 | Missense_Mutation     | SNP | 37 |
| 4 | TPTE2P1    | uc010tdh.2 | 3'UTR                 | SNP | 37 |
| 4 | CIDEA      | uc002kqu.4 | 3'UTR                 | SNP | 37 |
| 4 | SLC27A5    | uc002qtc.2 | Silent                | SNP | 37 |
| 4 | HELB       | uc001sti.2 | 3'UTR                 | SNP | 37 |
| 4 | SNORD115-4 | uc001yyu.1 | 5'Flank               | SNP | 37 |
| 4 | CDH9       | uc003jgs.1 | Missense_Mutation     | SNP | 37 |
| 4 | AOC3       | uc002ibv.3 | Missense_Mutation     | SNP | 37 |
| 4 | KY         | uc010hty.3 | Silent                | SNP | 37 |
| 4 | CLCA2      | uc001dlr.4 | Missense_Mutation     | SNP | 37 |
| 4 | OBSCN      | uc009xez.1 | Missense_Mutation     | SNP | 37 |
| 4 | WDR60      | uc003woe.4 | Missense_Mutation     | SNP | 37 |
| 4 | SLC25A3    | uc001tfo.3 | Silent                | SNP | 37 |
| 4 | HCRTR2     | uc003pcl.3 | Silent                | SNP | 37 |
| 4 | LOC595101  | uc002dxp.1 | Non-coding_Transcript | SNP | 37 |
| 4 | OR4K15     | uc010tkx.2 | Missense_Mutation     | SNP | 37 |
| 4 | IMPG2      | uc003duq.2 | Missense_Mutation     | SNP | 37 |
| 4 | PRB1       | uc001qzw.1 | Missense_Mutation     | SNP | 37 |
| 4 | LMO7       | uc021rkq.1 | Silent                | SNP | 37 |

|   |              |            |                       |     |    |
|---|--------------|------------|-----------------------|-----|----|
| 4 | DCC          | uc002lfe.2 | Missense_Mutation     | SNP | 37 |
| 4 | FCGBP        | uc002omp.4 | Missense_Mutation     | SNP | 37 |
| 4 | ITIH4        | uc011bem.2 | Silent                | SNP | 37 |
| 4 | FBR3         | uc002dzd.4 | Missense_Mutation     | SNP | 37 |
| 4 | CXorf59      | uc004ddk.1 | 3'UTR                 | SNP | 37 |
| 4 | NLRC4        | uc002roi.3 | Nonsense_Mutation     | SNP | 37 |
| 4 | FAM125B      | uc004bqh.2 | Missense_Mutation     | SNP | 37 |
| 4 | LOH12CR1     | uc001ral.2 | Missense_Mutation     | SNP | 37 |
| 4 | ALG6         | uc021oof.1 | 5'UTR                 | SNP | 37 |
| 4 | ZNF665       | uc010eqm.1 | Silent                | SNP | 37 |
| 4 | TMEM74       | uc003ymy.1 | Silent                | SNP | 37 |
| 4 | CDH8         | uc002eog.2 | Missense_Mutation     | SNP | 37 |
| 4 | THEG         | uc002lol.3 | Missense_Mutation     | SNP | 37 |
| 4 | ST3GAL6      | uc010hpd.3 | Splice_Site           | SNP | 37 |
| 4 | HSD17B6      | uc001smg.1 | Nonsense_Mutation     | SNP | 37 |
| 4 | MFSD6L       | uc002glp.2 | Missense_Mutation     | SNP | 37 |
| 4 | PKDREJ       | uc003bhh.3 | Missense_Mutation     | SNP | 37 |
| 4 | LOC100131347 | uc002hrf.1 | Missense_Mutation     | SNP | 37 |
| 4 | C12orf61     | uc001sri.1 | 5'Flank               | SNP | 37 |
| 4 | CYP4Z2P      | uc001cqp.1 | Non-coding_Transcript | SNP | 37 |
| 4 | NEMF         | uc010anj.1 | Missense_Mutation     | SNP | 37 |
| 4 | MUC16        | uc002mkp.3 | Missense_Mutation     | SNP | 37 |
| 4 | C2orf51      | uc002stb.2 | Splice_Site           | SNP | 37 |
| 4 | MRPL46       | uc002bmj.2 | Missense_Mutation     | SNP | 37 |
| 4 | BPI          | uc002xib.2 | Silent                | SNP | 37 |
| 4 | AV8S2        | uc001wch.2 | Silent                | SNP | 37 |
| 4 | DNAH5        | uc003jfd.2 | Silent                | SNP | 37 |
| 4 | USH2A        | uc001hku.1 | Missense_Mutation     | SNP | 37 |
| 4 | TLR3         | uc003iyq.3 | Missense_Mutation     | SNP | 37 |
| 4 | RELN         | uc022ajr.1 | Missense_Mutation     | SNP | 37 |
| 4 | SI           | uc003fei.3 | Missense_Mutation     | SNP | 37 |
| 4 | ABCA4        | uc001dqh.3 | Missense_Mutation     | SNP | 37 |
| 4 | COL2A1       | uc001rqu.3 | Missense_Mutation     | SNP | 37 |
| 4 | FAM75E1      | uc004app.4 | Missense_Mutation     | SNP | 37 |
| 4 | GLT25D1      | uc002nhc.1 | Silent                | SNP | 37 |
| 4 | PROS1        | uc003drb.4 | Missense_Mutation     | SNP | 37 |
| 4 | NUAK1        | uc001tlj.1 | Missense_Mutation     | SNP | 37 |
| 4 | LOC728875    | uc001ekz.4 | Splice_Site           | SNP | 37 |
| 4 | LGR5         | uc001swl.3 | Missense_Mutation     | SNP | 37 |
| 4 | KRT17        | uc002hxx.2 | 3'UTR                 | SNP | 37 |
| 4 | CMKLR1       | uc009zuw.3 | Silent                | SNP | 37 |
| 4 | PTPRG        | uc003dlb.3 | Intron                | SNP | 37 |
| 4 | CR936796     | uc001eiw.1 | Intron                | SNP | 37 |

|   |           |            |                       |     |    |
|---|-----------|------------|-----------------------|-----|----|
| 4 | FAM57B    | uc002dvt.3 | Missense_Mutation     | SNP | 37 |
| 4 | CDH7      | uc002ljj.3 | Missense_Mutation     | SNP | 37 |
| 4 | SGK223    | uc003wsh.4 | Nonsense_Mutation     | SNP | 37 |
| 4 | FASN      | uc002kdu.3 | Silent                | SNP | 37 |
| 4 | TNFSF15   | uc004bjh.3 | Missense_Mutation     | SNP | 37 |
| 4 | DAO       | uc001tnr.4 | Missense_Mutation     | SNP | 37 |
| 4 | CNNM3     | uc002swy.3 | Missense_Mutation     | SNP | 37 |
| 4 | WFDC10B   | uc002xpc.3 | Silent                | SNP | 37 |
| 4 | DPPA5     | uc003pgs.2 | Missense_Mutation     | SNP | 37 |
| 4 | ATF7IP2   | uc002czu.3 | Silent                | SNP | 37 |
| 4 | ZFP112    | uc010xwy.2 | Silent                | SNP | 37 |
| 4 | CHAF1B    | uc002yvj.3 | Silent                | SNP | 37 |
| 4 | LILRP2    | uc002qgs.1 | Non-coding_Transcript | SNP | 37 |
| 4 | SNRPN     | uc021sgb.1 | Missense_Mutation     | SNP | 37 |
| 4 | ITIH1     | uc003dfs.3 | Silent                | SNP | 37 |
| 4 | TEAD2     | uc002pnh.3 | Missense_Mutation     | SNP | 37 |
| 4 | TCRBV20S1 | uc011krs.1 | Missense_Mutation     | SNP | 37 |
| 4 | KCNB2     | uc003xzb.3 | Missense_Mutation     | SNP | 37 |
| 4 | MEF2D     | uc001fpc.3 | Missense_Mutation     | SNP | 37 |
| 4 | DSG3      | uc002kws.3 | Missense_Mutation     | SNP | 37 |
| 4 | TFAP2A    | uc003myr.3 | Silent                | SNP | 37 |
| 4 | CD86      | uc003eet.3 | Silent                | SNP | 37 |
| 4 | OR5AP2    | uc001njb.1 | Missense_Mutation     | SNP | 37 |
| 4 | PAK3      | uc010npv.1 | Missense_Mutation     | SNP | 37 |
| 4 | F5        | uc001ggg.1 | Nonsense_Mutation     | SNP | 37 |
| 4 | NCOR2     | uc021rga.1 | Missense_Mutation     | SNP | 37 |
| 4 | SLFN12L   | uc002hjn.3 | Missense_Mutation     | SNP | 37 |
| 4 | CACNA1A   | uc010xne.2 | Missense_Mutation     | SNP | 37 |
| 4 | KCNH5     | uc001xfx.3 | Silent                | SNP | 37 |
| 4 | LILRB4    | uc010ert.3 | Missense_Mutation     | SNP | 37 |
| 4 | FGF12     | uc003fsx.3 | Silent                | SNP | 37 |
| 4 | UGT8      | uc003ibs.2 | Splice_Site           | SNP | 37 |
| 4 | MACF1     | uc021olw.1 | Missense_Mutation     | SNP | 37 |
| 4 | FABP1     | uc002sst.2 | Nonsense_Mutation     | SNP | 37 |
| 4 | MGAT5B    | uc002jti.3 | Silent                | SNP | 37 |
| 4 | DAPK3     | uc002lzc.1 | Silent                | SNP | 37 |
| 4 | PCDHAC2   | uc003lhf.2 | Silent                | SNP | 37 |
| 4 | CYP7A1    | uc003xtm.4 | Missense_Mutation     | SNP | 37 |
| 4 | TNR       | uc001gkp.1 | Missense_Mutation     | SNP | 37 |
| 4 | NEB       | uc002txu.3 | Missense_Mutation     | SNP | 37 |
| 4 | NALCN     | uc001vox.1 | Missense_Mutation     | SNP | 37 |
| 4 | SERPINA1  | uc001ycx.4 | 3'UTR                 | SNP | 37 |
| 4 | EXT1      | uc003yok.1 | Missense_Mutation     | SNP | 37 |



|   |          |            |                       |     |    |
|---|----------|------------|-----------------------|-----|----|
| 4 | C20orf11 | uc002ydy.3 | Missense_Mutation     | SNP | 37 |
| 4 | WNT4     | uc001bfs.4 | Intron                | SNP | 37 |
| 4 | CTLA4    | uc002vak.2 | Silent                | SNP | 37 |
| 4 | SLC2A12  | uc003qem.1 | Missense_Mutation     | SNP | 37 |
| 4 | CALCR    | uc003umv.2 | Missense_Mutation     | SNP | 37 |
| 4 | GUCY1A3  | uc003ioy.3 | Silent                | SNP | 37 |
| 4 | HMG20A   | uc002bcr.3 | Missense_Mutation     | SNP | 37 |
| 4 | MUC4     | uc021xjp.1 | Missense_Mutation     | SNP | 37 |
| 4 | KIAA1328 | uc002kzz.3 | Missense_Mutation     | SNP | 37 |
| 4 | OR6B2    | uc002vyr.3 | Silent                | SNP | 37 |
| 4 | DYTN     | uc002vbr.1 | Silent                | SNP | 37 |
| 4 | RHEB     | uc003wkh.1 | 3'UTR                 | SNP | 37 |
| 4 | HSF2BP   | uc002zdi.3 | Nonsense_Mutation     | SNP | 37 |
| 4 | PTPRC    | uc001gur.1 | Nonsense_Mutation     | SNP | 37 |
| 4 | KIAA0232 | uc003gjr.4 | Missense_Mutation     | SNP | 37 |
| 4 | CYLC2    | uc004bbs.2 | 5'UTR                 | SNP | 37 |
| 4 | ITSN1    | uc002yta.1 | Missense_Mutation     | SNP | 37 |
| 4 | BPTF     | uc002jgf.3 | Missense_Mutation     | SNP | 37 |
| 4 | PPM1E    | uc002iwx.3 | Splice_Site           | SNP | 37 |
| 4 | DNAH9    | uc002gne.3 | Nonsense_Mutation     | SNP | 37 |
| 4 | DKK3     | uc010rcg.1 | Silent                | SNP | 37 |
| 4 | ST5      | uc001mgt.3 | Silent                | SNP | 37 |
| 4 | SCGB2A1  | uc001nta.2 | 5'UTR                 | SNP | 37 |
| 4 | XPNPEP1  | uc010qrb.2 | 3'UTR                 | SNP | 37 |
| 4 | OR14A16  | uc001idm.1 | Silent                | SNP | 37 |
| 4 | NEB      | uc002txu.3 | Missense_Mutation     | SNP | 37 |
| 4 | RAB33B   | uc003ihv.3 | 5'UTR                 | SNP | 37 |
| 4 | abParts  | uc010yts.2 | Non-coding_Transcript | SNP | 37 |
| 4 | ZNF208   | uc021urr.1 | Missense_Mutation     | SNP | 37 |
| 4 | ANKRD30A | uc021ppc.1 | Missense_Mutation     | SNP | 37 |
| 4 | CD53     | uc001dzw.3 | 3'UTR                 | SNP | 37 |
| 4 | SEC31A   | uc003hnh.3 | Missense_Mutation     | SNP | 37 |
| 4 | TBX20    | uc011kas.2 | Missense_Mutation     | SNP | 37 |
| 4 | NOC3L    | uc001kjq.1 | Missense_Mutation     | SNP | 37 |
| 4 | ZNF326   | uc001dnq.2 | Missense_Mutation     | SNP | 37 |
| 4 | GLYCTK   | uc003ddo.3 | 3'UTR                 | SNP | 37 |
| 4 | KIF13A   | uc003ncg.4 | Missense_Mutation     | SNP | 37 |
| 4 | SP110    | uc002vqg.3 | Splice_Site           | SNP | 37 |
| 4 | GKN2     | uc002sfa.3 | Missense_Mutation     | SNP | 37 |
| 4 | KIAA1217 | uc001iru.4 | Silent                | SNP | 37 |
| 4 | PIGS     | uc002hbo.2 | Nonsense_Mutation     | SNP | 37 |
| 4 | ITGAD    | uc010cap.1 | Missense_Mutation     | SNP | 37 |
| 4 | MCTP2    | uc002btj.3 | Missense_Mutation     | SNP | 37 |

|   |          |            |                   |     |    |
|---|----------|------------|-------------------|-----|----|
| 4 | CDK15    | uc002uyt.2 | Silent            | SNP | 37 |
| 4 | PLCXD2   | uc003dya.3 | Missense_Mutation | SNP | 37 |
| 4 | RAPGEF5  | uc003svg.3 | Missense_Mutation | SNP | 37 |
| 4 | APOBEC3F | uc021wpr.1 | Missense_Mutation | SNP | 37 |
| 4 | ZSCAN1   | uc002qrc.1 | Silent            | SNP | 37 |
| 4 | VAV1     | uc002mfu.1 | Silent            | SNP | 37 |
| 4 | JMJD1C   | uc001jmn.3 | Missense_Mutation | SNP | 37 |
| 4 | RNFT2    | uc009zwn.3 | Silent            | SNP | 37 |
| 4 | FKBP10   | uc002hvx.2 | Missense_Mutation | SNP | 37 |
| 4 | ARHGAP28 | uc002knc.3 | Nonsense_Mutation | SNP | 37 |
| 4 | KCTD15   | uc002nuy.4 | Silent            | SNP | 37 |
| 4 | ZNF366   | uc003kce.1 | Missense_Mutation | SNP | 37 |
| 4 | RAB3GAP2 | uc010puk.1 | Intron            | SNP | 37 |
| 4 | EXPH5    | uc001pkk.3 | Missense_Mutation | SNP | 37 |
| 4 | TRPM3    | uc004aid.3 | Splice_Site       | SNP | 37 |
| 4 | CDH9     | uc003jgs.1 | Missense_Mutation | SNP | 37 |
| 4 | PROKR2   | uc010zqw.2 | Missense_Mutation | SNP | 37 |
| 4 | IGSF10   | uc011bod.2 | Missense_Mutation | SNP | 37 |
| 4 | TTN      | uc021vsy.1 | Missense_Mutation | SNP | 37 |
| 4 | CNNM3    | uc002swy.3 | Missense_Mutation | SNP | 37 |
| 4 | EPHA7    | uc003poe.3 | Splice_Site       | SNP | 37 |
| 4 | LRR3     | uc002zfa.3 | Silent            | SNP | 37 |
| 4 | SNRPD2   | uc002pcw.3 | 5'UTR             | SNP | 37 |
| 4 | GRIN2B   | uc001rbt.2 | Missense_Mutation | SNP | 37 |
| 4 | ARSJ     | uc003ibq.1 | Silent            | SNP | 37 |
| 4 | CLASP1   | uc002tnf.3 | Silent            | SNP | 37 |
| 4 | MUC16    | uc002mkp.3 | Silent            | SNP | 37 |
| 4 | TSKS     | uc002ppm.3 | Missense_Mutation | SNP | 37 |
| 4 | BMP1     | uc003xbg.3 | Silent            | SNP | 37 |
| 4 | SLCO1B1  | uc001req.4 | Missense_Mutation | SNP | 37 |
| 4 | OGDHL    | uc009xog.3 | Silent            | SNP | 37 |
| 4 | ADD2     | uc021vjc.1 | Missense_Mutation | SNP | 37 |
| 4 | NFKBIZ   | uc003dvp.3 | Silent            | SNP | 37 |
| 4 | ZNF549   | uc002qpb.2 | Missense_Mutation | SNP | 37 |
| 4 | ANKRD24  | uc010dt.1  | Silent            | SNP | 37 |
| 4 | CACNG3   | uc002dmf.3 | Silent            | SNP | 37 |
| 4 | SHROOM4  | uc004dpe.2 | Missense_Mutation | SNP | 37 |
| 4 | CMAS     | uc001rfm.3 | Missense_Mutation | SNP | 37 |
| 4 | HYDIN    | uc002ezr.3 | Silent            | SNP | 37 |
| 4 | ZNF221   | uc002ox.2  | Missense_Mutation | SNP | 37 |
| 4 | RP1      | uc003xsd.1 | Missense_Mutation | SNP | 37 |
| 4 | GCNT1    | uc010mpf.3 | Missense_Mutation | SNP | 37 |
| 4 | ALMS1    | uc002sje.1 | Silent            | SNP | 37 |

|   |           |            |                   |     |    |
|---|-----------|------------|-------------------|-----|----|
| 4 | ASTN1     | uc001glc.3 | Missense_Mutation | SNP | 37 |
| 4 | HSD17B7P2 | uc010qex.1 | Missense_Mutation | SNP | 37 |
| 4 | RGS7      | uc001hyv.2 | Nonsense_Mutation | SNP | 37 |
| 4 | SNX19     | uc001qgk.4 | Missense_Mutation | SNP | 37 |
| 4 | TMCC1     | uc021xdy.1 | Missense_Mutation | SNP | 37 |
| 4 | TULP2     | uc002pkz.2 | Splice_Site       | SNP | 37 |
| 4 | UNC13A    | uc021uqk.1 | Missense_Mutation | SNP | 37 |
| 4 | BANK1     | uc003hvy.4 | Missense_Mutation | SNP | 37 |
| 4 | ABCB5     | uc010kuh.3 | Missense_Mutation | SNP | 37 |
| 4 | PIK3AP1   | uc001kmq.3 | Nonsense_Mutation | SNP | 37 |
| 4 | MXRA5     | uc004crg.4 | Missense_Mutation | SNP | 37 |
| 4 | IFT172    | uc002rku.3 | Silent            | SNP | 37 |
| 4 | LOC645752 | uc010bky.2 | Nonsense_Mutation | SNP | 37 |
| 4 | OR5L1     | uc001nhw.1 | Missense_Mutation | SNP | 37 |
| 4 | MLL       | uc001ptb.3 | Missense_Mutation | SNP | 37 |
| 4 | MAGEC1    | uc004ftb.3 | Silent            | SNP | 37 |
| 4 | ZNF737    | uc002npa.3 | 5'UTR             | SNP | 37 |
| 4 | LOC643733 | uc021qpn.1 | Intron            | SNP | 37 |
| 4 | PCDHAC2   | uc003lhs.2 | Silent            | SNP | 37 |
| 4 | FAM71A    | uc001hjk.3 | Missense_Mutation | SNP | 37 |
| 4 | GCFC2     | uc002sno.3 | Missense_Mutation | SNP | 37 |
| 4 | RIMS2     | uc003ylp.3 | 5'UTR             | SNP | 37 |
| 4 | CLDND1    | uc003dst.3 | Silent            | SNP | 37 |
| 4 | OR4K1     | uc001vwj.2 | Missense_Mutation | SNP | 37 |
| 4 | AHI1      | uc003qgi.3 | Missense_Mutation | SNP | 37 |
| 4 | ILF3      | uc002mpo.3 | Missense_Mutation | SNP | 37 |
| 4 | DNAH7     | uc002utj.4 | Missense_Mutation | SNP | 37 |
| 4 | APOBEC3D  | uc003awt.4 | Missense_Mutation | SNP | 37 |
| 4 | MAGEC1    | uc004ftb.3 | Silent            | SNP | 37 |
| 4 | VAV3      | uc001dvj.1 | Missense_Mutation | SNP | 37 |
| 4 | PHKB      | uc002eev.4 | Missense_Mutation | SNP | 37 |
| 4 | MNDA      | uc001fsz.1 | Missense_Mutation | SNP | 37 |
| 4 | NEBL      | uc001iqi.3 | Intron            | SNP | 37 |
| 4 | C1QTNF9B  | uc010tcw.2 | Missense_Mutation | SNP | 37 |
| 4 | LRP5L     | uc003abs.3 | 5'UTR             | SNP | 37 |
| 4 | DKK2      | uc003hyi.3 | Silent            | SNP | 37 |
| 4 | OR6F1     | uc001idj.1 | Nonsense_Mutation | SNP | 37 |
| 4 | ZFHX4     | uc003yau.2 | Silent            | SNP | 37 |
| 4 | TRIM7     | uc003mmz.1 | Missense_Mutation | SNP | 37 |
| 4 | OR52B6    | uc010qzi.2 | Silent            | SNP | 37 |
| 4 | ACSM2A    | uc010bwe.3 | Silent            | SNP | 37 |
| 4 | CNTRL     | uc004bkx.1 | Silent            | SNP | 37 |
| 4 | LRRC4C    | uc001mx.1  | Silent            | SNP | 37 |

|   |          |            |                   |     |    |
|---|----------|------------|-------------------|-----|----|
| 4 | SH2B1    | uc002dri.3 | Missense_Mutation | SNP | 37 |
| 4 | MUC16    | uc002mkp.3 | Missense_Mutation | SNP | 37 |
| 4 | SPATA13  | uc001upd.2 | Missense_Mutation | SNP | 37 |
| 4 | GRIN2B   | uc001rbt.2 | Nonsense_Mutation | SNP | 37 |
| 4 | CASP1    | uc010rvk.2 | Silent            | SNP | 37 |
| 4 | SPEG     | uc010fwg.3 | Missense_Mutation | SNP | 37 |
| 4 | MC4R     | uc002lie.1 | Missense_Mutation | SNP | 37 |
| 4 | RPS6KA2  | uc003qvd.1 | Silent            | SNP | 37 |
| 4 | LRRC55   | uc001njl.2 | Silent            | SNP | 37 |
| 4 | LAMP2    | uc004ess.4 | Splice_Site       | SNP | 37 |
| 4 | HMCN1    | uc001grq.1 | Missense_Mutation | SNP | 37 |
| 4 | CFHR2    | uc001gtq.1 | Missense_Mutation | SNP | 37 |
| 4 | IPO13    | uc001ckx.3 | Silent            | SNP | 37 |
| 4 | RTEL1    | uc021wge.1 | Splice_Site       | SNP | 37 |
| 4 | CHD9     | uc002ehb.3 | Missense_Mutation | SNP | 37 |
| 4 | MICAL3   | uc002zng.4 | Missense_Mutation | SNP | 37 |
| 4 | ALPPL2   | uc002vss.4 | Missense_Mutation | SNP | 37 |
| 4 | PSG9     | uc002owd.4 | Missense_Mutation | SNP | 37 |
| 4 | LMNA     | uc001fni.2 | Splice_Site       | SNP | 37 |
| 4 | LIPI     | uc002yjm.3 | Missense_Mutation | SNP | 37 |
| 4 | KCNIP4   | uc021xmt.1 | Splice_Site       | SNP | 37 |
| 4 | ABCC1    | uc010bvi.3 | Silent            | SNP | 37 |
| 4 | ZNF862   | uc010lpn.3 | Missense_Mutation | SNP | 37 |
| 4 | OR2A2    | uc011ktz.2 | Missense_Mutation | SNP | 37 |
| 4 | ZNF668   | uc021tgt.1 | Missense_Mutation | SNP | 37 |
| 4 | BC139719 | uc002fqq.3 | 3'UTR             | SNP | 37 |
| 4 | CLEC14A  | uc001wum.1 | 3'UTR             | SNP | 37 |
| 4 | ERVFRD-1 | uc003mzt.3 | Missense_Mutation | SNP | 37 |
| 4 | TMPRSS2  | uc010gor.3 | Missense_Mutation | SNP | 37 |
| 4 | MAP4K1   | uc002oix.1 | Splice_Site       | SNP | 37 |
| 4 | TP73     | uc021off.1 | Missense_Mutation | SNP | 37 |
| 4 | FAM53C   | uc003lcv.3 | Missense_Mutation | SNP | 37 |
| 4 | CCDC147  | uc001kyh.3 | Missense_Mutation | SNP | 37 |
| 4 | IPO13    | uc001ckx.3 | Nonsense_Mutation | SNP | 37 |
| 4 | SCN1A    | uc002udo.4 | Missense_Mutation | SNP | 37 |
| 4 | ENAM     | uc011caw.1 | Silent            | SNP | 37 |
| 4 | PWP2     | uc002zeb.3 | Missense_Mutation | SNP | 37 |
| 4 | SERPINA6 | uc001ycv.3 | Silent            | SNP | 37 |
| 4 | MADCAM1  | uc002los.3 | Missense_Mutation | SNP | 37 |
| 4 | MAP1B    | uc003kbw.4 | Silent            | SNP | 37 |
| 4 | GRM3     | uc003uid.3 | Missense_Mutation | SNP | 37 |
| 4 | LRRC7    | uc001dep.3 | Missense_Mutation | SNP | 37 |
| 4 | NT5C3    | uc003tdk.3 | 3'UTR             | SNP | 37 |

|   |          |            |                   |     |    |
|---|----------|------------|-------------------|-----|----|
| 4 | BTBD2    | uc002lup.1 | 3'UTR             | SNP | 37 |
| 4 | SAMD3    | uc003qbx.3 | Missense_Mutation | SNP | 37 |
| 4 | PIN1     | uc002mml.2 | Missense_Mutation | SNP | 37 |
| 4 | NUPR1    | uc002dqd.1 | Missense_Mutation | SNP | 37 |
| 4 | TTN      | uc021vsy.1 | Silent            | SNP | 37 |
| 4 | HPS5     | uc001mod.1 | Missense_Mutation | SNP | 37 |
| 4 | MTSS1    | uc003yrl.2 | Silent            | SNP | 37 |
| 4 | EP400    | uc001ujn.3 | Missense_Mutation | SNP | 37 |
| 4 | PRDM9    | uc003jgo.3 | Nonsense_Mutation | SNP | 37 |
| 4 | FCRL5    | uc009wsm.3 | Missense_Mutation | SNP | 37 |
| 4 | MTERFD2  | uc002wan.1 | Missense_Mutation | SNP | 37 |
| 4 | MED7     | uc010jik.3 | Silent            | SNP | 37 |
| 4 | PREX1    | uc002xtw.1 | Missense_Mutation | SNP | 37 |
| 4 | PTPRB    | uc001swc.4 | Missense_Mutation | SNP | 37 |
| 4 | WDR72    | uc002acj.2 | Missense_Mutation | SNP | 37 |
| 4 | BRE      | uc002rls.3 | Missense_Mutation | SNP | 37 |
| 4 | SERPINB3 | uc002lji.3 | Silent            | SNP | 37 |
| 4 | C2orf89  | uc010ysl.2 | 3'UTR             | SNP | 37 |
| 4 | ENTPD4   | uc003xdl.3 | Missense_Mutation | SNP | 37 |
| 4 | GRM3     | uc003uid.3 | Missense_Mutation | SNP | 37 |
| 4 | RIOK1    | uc003mxn.3 | Silent            | SNP | 37 |
| 4 | OR4A16   | uc010rie.2 | Silent            | SNP | 37 |
| 4 | MMP17    | uc001ujc.1 | Missense_Mutation | SNP | 37 |
| 4 | RASGRF1  | uc002beq.3 | Silent            | SNP | 37 |
| 4 | TENC1    | uc001sbn.3 | Silent            | SNP | 37 |
| 4 | PTPRK    | uc011ebu.2 | Missense_Mutation | SNP | 37 |
| 4 | EPS8L1   | uc002qis.4 | Missense_Mutation | SNP | 37 |
| 4 | SIX6     | uc001xfa.4 | Missense_Mutation | SNP | 37 |
| 4 | RHD      | uc009vro.3 | Silent            | SNP | 37 |
| 4 | FAN1     | uc001zff.3 | Silent            | SNP | 37 |
| 4 | DMBT1    | uc001lgk.1 | Silent            | SNP | 37 |
| 4 | NPSR1    | uc003teh.1 | Nonsense_Mutation | SNP | 37 |
| 4 | PREPL    | uc002ruf.3 | Missense_Mutation | SNP | 37 |
| 4 | QRICH1   | uc010hkq.3 | Missense_Mutation | SNP | 37 |
| 4 | PRUNE2   | uc010mpk.3 | Silent            | SNP | 37 |
| 4 | MGA      | uc010ucy.2 | Silent            | SNP | 37 |
| 4 | OR10A6   | uc010rbh.2 | Silent            | SNP | 37 |
| 4 | OR52E8   | uc010qzr.2 | Silent            | SNP | 37 |
| 4 | CREM     | uc001iyb.3 | Silent            | SNP | 37 |
| 4 | TESPA1   | uc001sgn.3 | Silent            | SNP | 37 |
| 4 | BICC1    | uc001jki.1 | Silent            | SNP | 37 |
| 4 | OR14A16  | uc001idm.1 | Silent            | SNP | 37 |
| 4 | ACD      | uc002etq.4 | Missense_Mutation | SNP | 37 |

|   |          |             |                   |     |    |
|---|----------|-------------|-------------------|-----|----|
| 4 | CD6      | uc001nqq.3  | Missense_Mutation | SNP | 37 |
| 4 | RSG1     | uc001ayd.3  | 3'UTR             | SNP | 37 |
| 4 | HIVEP1   | uc003nac.3  | Silent            | SNP | 37 |
| 4 | LRP1B    | uc002tvj.1  | Missense_Mutation | SNP | 37 |
| 4 | SLC35C1  | uc001nbp.3  | Silent            | SNP | 37 |
| 4 | MIR494   | uc010txm.2  | 5'Flank           | SNP | 37 |
| 4 | OR51F2   | uc010qyn.2  | Missense_Mutation | SNP | 37 |
| 4 | POLR3E   | uc002dkk.3  | Silent            | SNP | 37 |
| 4 | TMEM200A | uc003qca.3  | Nonsense_Mutation | SNP | 37 |
| 4 | ATP8B4   | uc001z xu.3 | Missense_Mutation | SNP | 37 |
| 4 | NFYC     | uc001cge.3  | Silent            | SNP | 37 |
| 4 | SYNM     | uc002bup.3  | Missense_Mutation | SNP | 37 |
| 4 | DCDC1    | uc001msv.3  | 3'UTR             | SNP | 37 |
| 4 | RBM15    | uc001dzl.1  | Missense_Mutation | SNP | 37 |
| 4 | TAS2R46  | uc001qzp.1  | Silent            | SNP | 37 |
| 4 | OGDHL    | uc009xog.3  | 3'UTR             | SNP | 37 |
| 4 | CA2      | uc003ydk.2  | Missense_Mutation | SNP | 37 |
| 4 | ANKS1B   | uc001tgi.3  | Silent            | SNP | 37 |
| 4 | POLR3F   | uc002wqv.3  | Missense_Mutation | SNP | 37 |
| 4 | C3orf30  | uc003ecb.1  | Missense_Mutation | SNP | 37 |
| 4 | PSMD2    | uc003fnn.1  | Silent            | SNP | 37 |
| 4 | MUM1L1   | uc004emg.2  | Silent            | SNP | 37 |
| 4 | SYNE1    | uc021z hb.1 | Nonsense_Mutation | SNP | 37 |
| 4 | HTT      | uc021xkv.1  | Silent            | SNP | 37 |
| 4 | PEG3     | uc002qnr.2  | Missense_Mutation | SNP | 37 |
| 4 | TOR1B    | uc004byk.1  | Missense_Mutation | SNP | 37 |
| 4 | SPTAN1   | uc004bvm.4  | Silent            | SNP | 37 |
| 4 | ZNF665   | uc010eqm.1  | Missense_Mutation | SNP | 37 |
| 4 | CSMD1    | uc022aqr.1  | Missense_Mutation | SNP | 37 |
| 4 | GARNL3   | uc011mae.2  | Missense_Mutation | SNP | 37 |
| 4 | GALNTL2  | uc003car.4  | Missense_Mutation | SNP | 37 |
| 4 | BRIP1    | uc002izk.2  | Missense_Mutation | SNP | 37 |
| 4 | MYLK     | uc003ego.3  | Missense_Mutation | SNP | 37 |
| 4 | NPNT     | uc011cfd.2  | Missense_Mutation | SNP | 37 |
| 4 | SORCS3   | uc001kyi.1  | Silent            | SNP | 37 |
| 4 | SERPINB3 | uc002l jg.3 | Missense_Mutation | SNP | 37 |
| 4 | DYNC1H1  | uc001y ks.2 | Missense_Mutation | SNP | 37 |
| 4 | COL12A1  | uc021z bv.1 | Silent            | SNP | 37 |
| 4 | ABCA11P  | uc003gae.3  | 3'UTR             | SNP | 37 |
| 4 | ABCC10   | uc003ouy.1  | Missense_Mutation | SNP | 37 |
| 4 | HAUS4    | uc001whw.3  | Nonsense_Mutation | SNP | 37 |
| 4 | ACIN1    | uc001wit.4  | Silent            | SNP | 37 |
| 4 | HIVEP2   | uc003qjd.3  | Missense_Mutation | SNP | 37 |

|   |          |            |                       |     |    |
|---|----------|------------|-----------------------|-----|----|
| 4 | ALK      | uc002rmy.3 | Silent                | SNP | 37 |
| 4 | WBP2NL   | uc003bbt.3 | Missense_Mutation     | SNP | 37 |
| 4 | ARHGAP44 | uc002gnr.4 | Silent                | SNP | 37 |
| 4 | DAB2IP   | uc004bln.3 | 5'UTR                 | SNP | 37 |
| 4 | SLC15A1  | uc001vno.3 | Missense_Mutation     | SNP | 37 |
| 4 | CDC14C   | uc010kyv.1 | Silent                | SNP | 37 |
| 4 | abParts  | uc021ser.1 | Non-coding_Transcript | SNP | 37 |
| 4 | NOS1     | uc001twn.2 | Missense_Mutation     | SNP | 37 |
| 4 | GRIN2A   | uc002czo.4 | Silent                | SNP | 37 |
| 4 | CES5A    | uc021tir.1 | Missense_Mutation     | SNP | 37 |
| 4 | CNTNAP4  | uc002fex.1 | Missense_Mutation     | SNP | 37 |
| 4 | KRT17    | uc010wft.2 | 3'UTR                 | SNP | 37 |
| 4 | OR5B12   | uc010rkh.2 | Missense_Mutation     | SNP | 37 |
| 4 | BAZ2A    | uc001slq.1 | Missense_Mutation     | SNP | 37 |
| 4 | ZNF583   | uc010ygl.1 | 5'UTR                 | SNP | 37 |
| 4 | ZNF17    | uc002qop.1 | Missense_Mutation     | SNP | 37 |
| 4 | ERCC4    | uc002dce.2 | Missense_Mutation     | SNP | 37 |
| 4 | WDR62    | uc002odd.2 | Silent                | SNP | 37 |
| 4 | WDR66    | uc009zxx.3 | Missense_Mutation     | SNP | 37 |
| 4 | CUEDC1   | uc002ivd.1 | Missense_Mutation     | SNP | 37 |
| 4 | ADCY8    | uc003ytd.4 | Silent                | SNP | 37 |
| 4 | Unknown  |            | IGR                   | SNP | 37 |
| 4 | ZNF135   | uc002qrg.3 | 3'UTR                 | SNP | 37 |
| 4 | SPEG     | uc010fwg.3 | Missense_Mutation     | SNP | 37 |
| 4 | BEND4    | uc003gwn.3 | Silent                | SNP | 37 |
| 4 | ZNF683   | uc001bmg.1 | Silent                | SNP | 37 |
| 4 | LMTK3    | uc002pjk.3 | Missense_Mutation     | SNP | 37 |
| 4 | LHCGR    | uc002rwu.4 | Silent                | SNP | 37 |
| 4 | MUC16    | uc002mkp.3 | Silent                | SNP | 37 |
| 4 | FAM75C2  | uc011lti.2 | Missense_Mutation     | SNP | 37 |
| 4 | DAB2IP   | uc004bln.3 | Missense_Mutation     | SNP | 37 |
| 4 | SLCO1A2  | uc001ret.3 | 5'UTR                 | SNP | 37 |
| 4 | MAGEC2   | uc004fbu.2 | Silent                | SNP | 37 |
| 4 | RIMBP2   | uc001uil.2 | Missense_Mutation     | SNP | 37 |
| 4 | FNDC1    | uc010kqv.3 | Missense_Mutation     | SNP | 37 |
| 4 | DDR2     | uc001gcf.3 | Silent                | SNP | 37 |
| 4 | TLR7     | uc004cvc.3 | Missense_Mutation     | SNP | 37 |
| 4 | FAM5C    | uc001gse.1 | Missense_Mutation     | SNP | 37 |
| 4 | OPRM1    | uc011efe.2 | 3'UTR                 | SNP | 37 |
| 4 | CPT1C    | uc010eng.3 | Missense_Mutation     | SNP | 37 |
| 4 | CLCN1    | uc003wcr.1 | Silent                | SNP | 37 |
| 4 | PLEKHG4B | uc003jak.2 | Missense_Mutation     | SNP | 37 |
| 4 | RELN     | uc022ajr.1 | Missense_Mutation     | SNP | 37 |

|   |          |             |                   |     |    |
|---|----------|-------------|-------------------|-----|----|
| 4 | FILIP1   | uc010kbe.3  | Silent            | SNP | 37 |
| 4 | C15orf53 | uc001z kf.1 | Missense_Mutation | SNP | 37 |
| 4 | OTOA     | uc002djh.3  | 3'UTR             | SNP | 37 |
| 4 | TUBGCP5  | uc010axz.1  | 5'UTR             | SNP | 37 |
| 4 | FYCO1    | uc011bal.1  | Missense_Mutation | SNP | 37 |
| 4 | PLEKHA7  | uc010rcu.1  | Missense_Mutation | SNP | 37 |
| 4 | GDF3     | uc001qte.3  | Missense_Mutation | SNP | 37 |
| 4 | NR2C2AP  | uc002nlx.3  | Intron            | SNP | 37 |
| 4 | DPP8     | uc002aov.3  | Missense_Mutation | SNP | 37 |
| 4 | B3GNT7   | uc002vrs.3  | Silent            | SNP | 37 |
| 4 | CLDN11   | uc003fgx.3  | Missense_Mutation | SNP | 37 |
| 4 | CELA2A   | uc001awk.3  | 3'UTR             | SNP | 37 |
| 4 | MUC16    | uc002mkp.3  | Missense_Mutation | SNP | 37 |
| 4 | OR2G6    | uc001ien.1  | Silent            | SNP | 37 |
| 4 | C3orf35  | uc003cha.4  | Nonsense_Mutation | SNP | 37 |
| 4 | TRAV12-1 | uc001wbx.2  | Silent            | SNP | 37 |
| 4 | MCTP2    | uc002btj.3  | Missense_Mutation | SNP | 37 |
| 4 | ARHGEF17 | uc001otu.3  | Missense_Mutation | SNP | 37 |
| 4 | SLC38A4  | uc001rpi.2  | Silent            | SNP | 37 |
| 4 | DAG1     | uc021wxz.1  | Silent            | SNP | 37 |
| 4 | MS4A2    | uc001nop.3  | Missense_Mutation | SNP | 37 |
| 4 | GTF2E2   | uc003xig.3  | Missense_Mutation | SNP | 37 |
| 4 | DAB1     | uc001cys.1  | Missense_Mutation | SNP | 37 |
| 4 | LPHN2    | uc001dit.4  | Missense_Mutation | SNP | 37 |
| 4 | SULT1C3  | uc010ywo.2  | Silent            | SNP | 37 |
| 4 | IBA57    | uc001hsl.4  | Silent            | SNP | 37 |
| 4 | COL4A3   | uc002vom.2  | Missense_Mutation | SNP | 37 |
| 4 | GRIN2B   | uc001rbt.2  | Silent            | SNP | 37 |
| 4 | HP1BP3   | uc001bdw.1  | Missense_Mutation | SNP | 37 |
| 4 | TMC5     | uc002dgc.4  | Silent            | SNP | 37 |
| 4 | WDR59    | uc002fdh.1  | Silent            | SNP | 37 |
| 4 | DNAH7    | uc002utj.4  | Missense_Mutation | SNP | 37 |
| 4 | DISP2    | uc001zlk.1  | Silent            | SNP | 37 |
| 4 | CCDC30   | uc001chp.3  | 3'UTR             | SNP | 37 |
| 4 | OR52W1   | uc010qzz.2  | Missense_Mutation | SNP | 37 |
| 4 | TRAPPC12 | uc002qxm.1  | Silent            | SNP | 37 |
| 4 | UBR1     | uc001zqq.3  | 3'UTR             | SNP | 37 |
| 4 | TRIM69   | uc001zuf.2  | Silent            | SNP | 37 |
| 4 | OTUD4    | uc003ika.4  | Missense_Mutation | SNP | 37 |
| 4 | PEX5     | uc010sgd.2  | 3'UTR             | SNP | 37 |
| 4 | FAM73B   | uc004bxa.3  | Missense_Mutation | SNP | 37 |
| 4 | C15orf2  | uc001ywo.3  | Missense_Mutation | SNP | 37 |
| 4 | FEZ2     | uc002rpg.2  | Missense_Mutation | SNP | 37 |



|   |          |            |                       |     |    |
|---|----------|------------|-----------------------|-----|----|
| 4 | GABPB2   | uc001ewr.2 | Missense_Mutation     | SNP | 37 |
| 4 | TIAM1    | uc002yow.1 | Silent                | SNP | 37 |
| 4 | KIAA2022 | uc004eby.3 | Silent                | SNP | 37 |
| 4 | MTMR8    | uc011mou.2 | Missense_Mutation     | SNP | 37 |
| 4 | BECN1    | uc002ibo.3 | Silent                | SNP | 37 |
| 4 | NOTCH3   | uc002nan.3 | Missense_Mutation     | SNP | 37 |
| 4 | LAMA2    | uc021zfb.1 | Missense_Mutation     | SNP | 37 |
| 4 | S1PR5    | uc002mot.2 | Silent                | SNP | 37 |
| 4 | GOLGA2   | uc011maw.2 | Missense_Mutation     | SNP | 37 |
| 4 | TEX2     | uc002jed.3 | Missense_Mutation     | SNP | 37 |
| 4 | MARC1    | uc001hmt.3 | Missense_Mutation     | SNP | 37 |
| 4 | XIRP2    | uc002udx.3 | Missense_Mutation     | SNP | 37 |
| 4 | KRT73    | uc001sas.3 | Silent                | SNP | 37 |
| 4 | SLC17A5  | uc003phn.4 | Silent                | SNP | 37 |
| 4 | PDHA1    | uc004czh.4 | Missense_Mutation     | SNP | 37 |
| 4 | ADAM21   | uc001xmd.3 | Silent                | SNP | 37 |
| 4 | TMEM219  | uc002duw.2 | 5'UTR                 | SNP | 37 |
| 4 | NOS2     | uc002gzu.3 | Silent                | SNP | 37 |
| 4 | OR51M1   | uc010qzc.2 | Missense_Mutation     | SNP | 37 |
| 4 | CYP2D7P1 | uc003bci.3 | Missense_Mutation     | SNP | 37 |
| 4 | C14orf39 | uc001hez.4 | Missense_Mutation     | SNP | 37 |
| 4 | SYT17    | uc002dfw.3 | Missense_Mutation     | SNP | 37 |
| 4 | ZFP112   | uc010xxa.2 | Nonsense_Mutation     | SNP | 37 |
| 4 | NUP214   | uc004cag.3 | Missense_Mutation     | SNP | 37 |
| 4 | TBC1D24  | uc002cqj.3 | Silent                | SNP | 37 |
| 4 | abParts  | uc021ser.1 | Non-coding_Transcript | SNP | 37 |
| 4 | ITGB4    | uc002jpg.3 | Silent                | SNP | 37 |
| 4 | L3MBTL4  | uc002kmz.4 | Missense_Mutation     | SNP | 37 |
| 4 | FAM135A  | uc003pfj.3 | Splice_Site           | SNP | 37 |
| 4 | NCDN     | uc001bza.3 | Missense_Mutation     | SNP | 37 |
| 4 | CACNA1S  | uc001gvv.3 | Splice_Site           | SNP | 37 |
| 4 | ZFH3     | uc002fck.3 | Missense_Mutation     | SNP | 37 |
| 4 | abParts  | uc021ser.1 | Non-coding_Transcript | SNP | 37 |
| 4 | TBX22    | uc010nmg.1 | Missense_Mutation     | SNP | 37 |
| 4 | CDSN     | uc003nsm.2 | Silent                | SNP | 37 |
| 4 | NOS1     | uc001tw.2  | Missense_Mutation     | SNP | 37 |
| 4 | KCNH5    | uc001xfx.3 | Missense_Mutation     | SNP | 37 |
| 4 | PSG5     | uc002ovu.3 | Silent                | SNP | 37 |
| 4 | SLC22A7  | uc021yzt.1 | Silent                | SNP | 37 |
| 4 | ZNF192   | uc003nkn.1 | Silent                | SNP | 37 |
| 4 | MAGEC1   | uc004f.3   | Nonsense_Mutation     | SNP | 37 |
| 4 | SARS2    | uc010xup.1 | 5'UTR                 | SNP | 37 |
| 4 | IGSF5    | uc002yyo.3 | Missense_Mutation     | SNP | 37 |

|   |           |            |                   |     |    |
|---|-----------|------------|-------------------|-----|----|
| 4 | TRAV14DV4 | uc010aiz.2 | Silent            | SNP | 37 |
| 4 | EDIL3     | uc003kio.1 | Missense_Mutation | SNP | 37 |
| 4 | GRHL2     | uc010mbu.3 | Missense_Mutation | SNP | 37 |
| 4 | PIP5K1B   | uc004agu.3 | Missense_Mutation | SNP | 37 |
| 4 | CCDC136   | uc003vnv.2 | Missense_Mutation | SNP | 37 |
| 4 | RFPL2     | uc003amg.3 | Silent            | SNP | 37 |
| 4 | CHD9      | uc002ehb.3 | Missense_Mutation | SNP | 37 |
| 4 | NTRK2     | uc004anz.1 | Silent            | SNP | 37 |
| 4 | CAMKV     | uc003cxt.1 | Missense_Mutation | SNP | 37 |
| 4 | CLEC2L    | uc010lnd.3 | Silent            | SNP | 37 |
| 4 | SLITRK1   | uc001vlk.3 | Missense_Mutation | SNP | 37 |
| 4 | IPO8      | uc001rjd.3 | Missense_Mutation | SNP | 37 |
| 4 | MACF1     | uc021olw.1 | Missense_Mutation | SNP | 37 |
| 4 | TRDN      | uc003pzj.2 | Missense_Mutation | SNP | 37 |
| 4 | ACOT11    | uc001cxm.2 | Splice_Site       | SNP | 37 |
| 4 | TMEM217   | uc003onl.3 | Missense_Mutation | SNP | 37 |
| 4 | APLNR     | uc001njo.3 | Missense_Mutation | SNP | 37 |
| 4 | BDKRB2    | uc010avm.1 | Silent            | SNP | 37 |
| 4 | SHANK1    | uc002psx.1 | Silent            | SNP | 37 |
| 4 | SPAG16    | uc002veq.3 | Missense_Mutation | SNP | 37 |
| 4 | AK310228  | uc010bvu.2 | Silent            | SNP | 37 |
| 4 | SLAMF6    | uc010pjj.2 | 3'UTR             | SNP | 37 |
| 4 | BCAM      | uc002ozu.3 | Missense_Mutation | SNP | 37 |
| 4 | RTTN      | uc002lkp.2 | Missense_Mutation | SNP | 37 |
| 4 | ARRDC5    | uc002mbm.3 | Silent            | SNP | 37 |
| 4 | MED13L    | uc001tvw.3 | Silent            | SNP | 37 |
| 4 | PRPF3     | uc001eum.4 | Silent            | SNP | 37 |
| 4 | COL25A1   | uc021xqo.1 | Missense_Mutation | SNP | 37 |
| 4 | OR2T12    | uc010pzj.2 | Silent            | SNP | 37 |
| 4 | SPEG      | uc010fwg.3 | Silent            | SNP | 37 |
| 4 | FAM186B   | uc001ruo.3 | Silent            | SNP | 37 |
| 4 | HNF4G     | uc003yar.3 | Silent            | SNP | 37 |
| 4 | B3GALT1   | uc002udz.1 | 5'UTR             | SNP | 37 |
| 4 | GDAP2     | uc001ehf.3 | Missense_Mutation | SNP | 37 |
| 4 | KDELR1    | uc002pja.1 | 5'UTR             | SNP | 37 |
| 4 | TBC1D25   | uc011mmb.1 | Silent            | SNP | 37 |
| 4 | SEMG2     | uc002xnk.3 | Missense_Mutation | SNP | 37 |
| 4 | USP6      | uc010ckz.1 | Silent            | SNP | 37 |
| 4 | NETO1     | uc002lkw.3 | Missense_Mutation | SNP | 37 |
| 4 | OR9G4     | uc010rjo.2 | Silent            | SNP | 37 |
| 4 | SPAG5     | uc002hbq.3 | Missense_Mutation | SNP | 37 |
| 4 | KCND2     | uc003vjj.1 | Missense_Mutation | SNP | 37 |
| 4 | MAGEC1    | uc004fbt.3 | Nonsense_Mutation | SNP | 37 |

|   |          |            |                       |     |    |
|---|----------|------------|-----------------------|-----|----|
| 4 | RTN4IP1  | uc003prj.3 | Missense_Mutation     | SNP | 37 |
| 4 | NKTR     | uc003clo.3 | Missense_Mutation     | SNP | 37 |
| 4 | NOVA1    | uc001wpy.3 | Missense_Mutation     | SNP | 37 |
| 4 | SPP2     | uc002vvk.1 | Missense_Mutation     | SNP | 37 |
| 4 | FAM181A  | uc001ybz.2 | Silent                | SNP | 37 |
| 4 | KIAA1024 | uc002bew.1 | Missense_Mutation     | SNP | 37 |
| 4 | NALCN    | uc001vox.1 | Missense_Mutation     | SNP | 37 |
| 4 | LRTM1    | uc003dhl.3 | Silent                | SNP | 37 |
| 4 | SRPK2    | uc003vcv.3 | Missense_Mutation     | SNP | 37 |
| 4 | AK022382 | uc001jff.1 | Non-coding_Transcript | SNP | 37 |
| 4 | PIK3R1   | uc011crb.2 | 3'UTR                 | SNP | 37 |
| 4 | AMY2A    | uc001dut.3 | Missense_Mutation     | SNP | 37 |
| 4 | ZNF366   | uc003kce.1 | Silent                | SNP | 37 |
| 4 | THBS4    | uc021yaw.1 | Missense_Mutation     | SNP | 37 |
| 4 | DLEU7    | uc001vez.3 | Missense_Mutation     | SNP | 37 |
| 4 | MEP1B    | uc002kxj.4 | Silent                | SNP | 37 |
| 4 | KIFAP3   | uc001ggv.3 | 5'UTR                 | SNP | 37 |
| 4 | TCRA     | uc001wcu.4 | Missense_Mutation     | SNP | 37 |
| 4 | KRTAP4-6 | uc010cxk.2 | Missense_Mutation     | SNP | 37 |
| 4 | DSG2     | uc002kwu.4 | Missense_Mutation     | SNP | 37 |
| 4 | ABCA13   | uc003toq.2 | Missense_Mutation     | SNP | 37 |
| 4 | ZNF783   | uc011kuo.2 | Missense_Mutation     | SNP | 37 |
| 4 | GMIP     | uc002nnd.3 | Silent                | SNP | 37 |
| 4 | GPBP1    | uc003jrk.4 | Silent                | SNP | 37 |
| 4 | SZT2     | uc001cjk.2 | Missense_Mutation     | SNP | 37 |
| 4 | CAD      | uc002rji.3 | Nonsense_Mutation     | SNP | 37 |
| 4 | ZNF365   | uc001jmb.4 | 3'UTR                 | SNP | 37 |
| 4 | RASA2    | uc010huq.1 | Splice_Site           | SNP | 37 |
| 4 | CSMD1    | uc022aqr.1 | Missense_Mutation     | SNP | 37 |
| 4 | CEACAM1  | uc002oua.3 | 3'UTR                 | SNP | 37 |
| 4 | ZNF589   | uc003csl.4 | Missense_Mutation     | SNP | 37 |
| 4 | CTAGE5   | uc001wvi.4 | Missense_Mutation     | SNP | 37 |
| 4 | TPTE2    | uc001umd.3 | Intron                | SNP | 37 |
| 4 | TIAM1    | uc002yow.1 | Splice_Site           | SNP | 37 |
| 4 | DISP2    | uc001zlk.1 | Missense_Mutation     | SNP | 37 |
| 4 | NCKAP5   | uc002ttp.3 | Missense_Mutation     | SNP | 37 |
| 4 | FKBP10   | uc002hvx.2 | Missense_Mutation     | SNP | 37 |
| 4 | MEF2D    | uc001fpc.3 | Silent                | SNP | 37 |
| 4 | PLEKHG6  | uc001qns.3 | Missense_Mutation     | SNP | 37 |
| 4 | DDX3X    | uc004dfe.3 | Nonsense_Mutation     | SNP | 37 |
| 4 | PRMT5    | uc001whm.1 | Missense_Mutation     | SNP | 37 |
| 4 | SLTM     | uc002afp.3 | Missense_Mutation     | SNP | 37 |
| 4 | MAPK4    | uc002lev.3 | 3'UTR                 | SNP | 37 |

|   |           |            |                   |     |    |
|---|-----------|------------|-------------------|-----|----|
| 4 | PHF3      | uc003pep.1 | Missense_Mutation | SNP | 37 |
| 4 | CSMD2     | uc001bxm.1 | Missense_Mutation | SNP | 37 |
| 4 | EDAR      | uc010fjn.3 | Missense_Mutation | SNP | 37 |
| 4 | ZFP64     | uc002xwl.3 | Silent            | SNP | 37 |
| 4 | MEIS2     | uc001zjr.3 | Silent            | SNP | 37 |
| 4 | ADAM22    | uc003ujp.1 | Missense_Mutation | SNP | 37 |
| 4 | PLB1      | uc002rmb.2 | Missense_Mutation | SNP | 37 |
| 4 | EXOC8     | uc001huq.3 | Silent            | SNP | 37 |
| 4 | TTN       | uc021vsy.1 | Missense_Mutation | SNP | 37 |
| 4 | ADH1A     | uc003hur.2 | Silent            | SNP | 37 |
| 4 | MARK4     | uc002pbb.2 | Missense_Mutation | SNP | 37 |
| 4 | SLC2A12   | uc003qem.1 | Missense_Mutation | SNP | 37 |
| 4 | MFN2      | uc001atn.4 | Missense_Mutation | SNP | 37 |
| 4 | LCE1E     | uc001fan.3 | Missense_Mutation | SNP | 37 |
| 4 | PIGS      | uc002hbo.2 | Silent            | SNP | 37 |
| 4 | SCML4     | uc010kdf.3 | Missense_Mutation | SNP | 37 |
| 4 | CNTN1     | uc009zjy.2 | 3'UTR             | SNP | 37 |
| 4 | FREM1     | uc003zlm.3 | Silent            | SNP | 37 |
| 4 | HIST1H2BN | uc003nju.1 | Missense_Mutation | SNP | 37 |
| 4 | FCRL1     | uc001frg.3 | Silent            | SNP | 37 |
| 4 | LOC642846 | uc010sgp.1 | Intron            | SNP | 37 |
| 4 | LRRC37B   | uc002hgu.3 | Silent            | SNP | 37 |
| 4 | MEGF8     | uc002otl.4 | Missense_Mutation | SNP | 37 |
| 4 | CGB1      | uc002plx.3 | Silent            | SNP | 37 |
| 4 | TMEM161A  | uc002nlg.3 | Missense_Mutation | SNP | 37 |
| 4 | FAM59A    | uc002kxl.3 | Missense_Mutation | SNP | 37 |
| 4 | SS18      | uc002kvm.3 | Missense_Mutation | SNP | 37 |
| 4 | MBD2      | uc002lfh.2 | 3'UTR             | SNP | 37 |
| 4 | STON2     | uc001xvk.1 | Silent            | SNP | 37 |
| 4 | TSPYL1    | uc003pwp.4 | Silent            | SNP | 37 |
| 4 | C3orf39   | uc003cmq.1 | 3'UTR             | SNP | 37 |
| 4 | INADL     | uc001dab.3 | Silent            | SNP | 37 |
| 4 | BCL2L15   | uc001edw.3 | Silent            | SNP | 37 |
| 4 | CXorf59   | uc004ddk.1 | Missense_Mutation | SNP | 37 |
| 4 | SLC5A12   | uc001mra.2 | Missense_Mutation | SNP | 37 |
| 4 | TAS2R10   | uc001qyy.1 | Missense_Mutation | SNP | 37 |
| 4 | RNF185    | uc003akb.3 | Missense_Mutation | SNP | 37 |
| 4 | COL4A4    | uc021vxr.1 | Silent            | SNP | 37 |
| 4 | DAGLB     | uc003sqa.3 | Missense_Mutation | SNP | 37 |
| 4 | DNAH5     | uc003jfd.2 | Missense_Mutation | SNP | 37 |
| 4 | TREM2     | uc003opz.2 | Missense_Mutation | SNP | 37 |
| 4 | FRMPD4    | uc004cuz.2 | Silent            | SNP | 37 |
| 4 | PDE3A     | uc001reh.2 | Missense_Mutation | SNP | 37 |

|   |          |            |                   |     |    |
|---|----------|------------|-------------------|-----|----|
| 4 | CACNA1A  | uc010xne.2 | Silent            | SNP | 37 |
| 4 | PPP2R3B  | uc004cpg.3 | Missense_Mutation | SNP | 37 |
| 4 | Unknown  |            | IGR               | SNP | 37 |
| 4 | CNTNAP4  | uc002fex.1 | Missense_Mutation | SNP | 37 |
| 4 | FAM46D   | uc004edl.1 | Missense_Mutation | SNP | 37 |
| 4 | AFF3     | uc002taf.3 | Silent            | SNP | 37 |
| 4 | EYA2     | uc002xsm.3 | Intron            | SNP | 37 |
| 4 | APOB     | uc002red.3 | Missense_Mutation | SNP | 37 |
| 4 | TNXB     | uc003nzl.2 | Missense_Mutation | SNP | 37 |
| 4 | MAPK15   | uc003yzj.3 | Missense_Mutation | SNP | 37 |
| 4 | RBM44    | uc002vxi.4 | Missense_Mutation | SNP | 37 |
| 4 | PDE6H    | uc001rcr.3 | 3'UTR             | SNP | 37 |
| 4 | MRPS31   | uc001uxm.4 | Splice_Site       | SNP | 37 |
| 4 | CSPG5    | uc003crp.4 | Intron            | SNP | 37 |
| 4 | MYLIP    | uc003nbq.3 | Silent            | SNP | 37 |
| 4 | PRR16    | uc003ksq.3 | Silent            | SNP | 37 |
| 4 | SLC44A3  | uc001dqv.4 | Silent            | SNP | 37 |
| 4 | KIAA1244 | uc003qhu.3 | Missense_Mutation | SNP | 37 |
| 4 | ZAN      | uc003uwj.3 | Missense_Mutation | SNP | 37 |
| 4 | OTOGL    | uc001szd.3 | Missense_Mutation | SNP | 37 |
| 4 | RAI2     | uc004cyf.3 | Silent            | SNP | 37 |
| 4 | PTPRE    | uc009yat.3 | Missense_Mutation | SNP | 37 |
| 4 | NPVF     | uc003sxo.3 | Missense_Mutation | SNP | 37 |
| 4 | GPR149   | uc003faa.3 | Missense_Mutation | SNP | 37 |
| 4 | EPHA3    | uc003dqy.3 | Missense_Mutation | SNP | 37 |
| 4 | IL37     | uc002tij.3 | Missense_Mutation | SNP | 37 |
| 4 | COQ5     | uc001tyn.3 | Nonsense_Mutation | SNP | 37 |
| 4 | HYDIN    | uc002ezr.3 | Missense_Mutation | SNP | 37 |
| 4 | SOX6     | uc001mme.3 | Missense_Mutation | SNP | 37 |
| 4 | LRFN2    | uc003oph.1 | Missense_Mutation | SNP | 37 |
| 4 | MEF2D    | uc001fpc.3 | Missense_Mutation | SNP | 37 |
| 4 | FBXW4    | uc001kto.3 | 3'UTR             | SNP | 37 |
| 4 | IGDCC3   | uc002aos.2 | Missense_Mutation | SNP | 37 |
| 4 | RYR1     | uc002oit.3 | Silent            | SNP | 37 |
| 4 | TAOK1    | uc002hdz.2 | Missense_Mutation | SNP | 37 |
| 4 | PLCB1    | uc002wnb.3 | Silent            | SNP | 37 |
| 4 | CLDND1   | uc003dst.3 | Missense_Mutation | SNP | 37 |
| 4 | FMO3     | uc001ghi.3 | Missense_Mutation | SNP | 37 |
| 4 | ILF3     | uc002mpo.3 | Missense_Mutation | SNP | 37 |
| 4 | CACNA1S  | uc001gvv.3 | Missense_Mutation | SNP | 37 |
| 4 | TRIOBP   | uc003atx.1 | Silent            | SNP | 37 |
| 4 | WDR83    | uc010dyw.3 | 5'UTR             | SNP | 37 |
| 4 | VAV3     | uc001dvj.1 | Missense_Mutation | SNP | 37 |

|   |           |            |                       |     |    |
|---|-----------|------------|-----------------------|-----|----|
| 4 | CD1A      | uc001frt.3 | 3'UTR                 | SNP | 37 |
| 4 | PDE8A     | uc002blh.3 | Nonsense_Mutation     | SNP | 37 |
| 4 | RFWD2     | uc001gku.1 | 3'UTR                 | SNP | 37 |
| 4 | CYB5R2    | uc001mfm.3 | Missense_Mutation     | SNP | 37 |
| 4 | ZNF2      | uc002suf.3 | Missense_Mutation     | SNP | 37 |
| 4 | GRIA1     | uc011dcy.2 | Missense_Mutation     | SNP | 37 |
| 4 | TTN       | uc021vsz.1 | Silent                | SNP | 37 |
| 4 | C12orf35  | uc001rks.3 | Missense_Mutation     | SNP | 37 |
| 4 | MAMDC2    | uc004ahm.2 | Missense_Mutation     | SNP | 37 |
| 4 | CD209     | uc002mht.2 | Missense_Mutation     | SNP | 37 |
| 4 | ZNF880    | uc002pzc.3 | Missense_Mutation     | SNP | 37 |
| 4 | CXADRP3   | uc010xai.2 | Non-coding_Transcript | SNP | 37 |
| 4 | GJA10     | uc011eea.2 | Silent                | SNP | 37 |
| 4 | ALK       | uc002rmy.3 | Silent                | SNP | 37 |
| 4 | LOC401010 | uc002tst.2 | 5'UTR                 | SNP | 37 |
| 4 | TAF1C     | uc002fhn.3 | Missense_Mutation     | SNP | 37 |
| 4 | KCNH8     | uc003cbk.1 | Missense_Mutation     | SNP | 37 |
| 4 | USP26     | uc010nrm.1 | Missense_Mutation     | SNP | 37 |
| 4 | SMPD3     | uc002ewa.3 | Missense_Mutation     | SNP | 37 |
| 4 | CYP3A7    | uc003uru.3 | Silent                | SNP | 37 |
| 4 | RELN      | uc022ajr.1 | Silent                | SNP | 37 |
| 4 | MAP3K9    | uc001xml.3 | Missense_Mutation     | SNP | 37 |
| 4 | PPP2R3B   | uc004cpf.3 | 5'UTR                 | SNP | 37 |
| 4 | ITIH4     | uc011bem.2 | Silent                | SNP | 37 |
| 4 | EPHA4     | uc002vmq.3 | 5'UTR                 | SNP | 37 |
| 4 | MUC17     | uc003uxp.1 | Nonsense_Mutation     | SNP | 37 |
| 4 | GLT1D1    | uc010tbh.1 | Silent                | SNP | 37 |
| 4 | DNM3      | uc001gie.3 | Missense_Mutation     | SNP | 37 |
| 4 | NHP2L1    | uc003bat.3 | 5'UTR                 | SNP | 37 |
| 4 | ARPP21    | uc011axy.2 | Missense_Mutation     | SNP | 37 |
| 4 | RREB1     | uc003mxb.3 | Silent                | SNP | 37 |
| 4 | WNT9B     | uc002ikw.1 | Silent                | SNP | 37 |
| 4 | MRPS22    | uc003etb.3 | 5'UTR                 | SNP | 37 |
| 4 | GAPDH     | uc001qop.1 | Intron                | SNP | 37 |
| 4 | IGSF22    | uc009yht.2 | Missense_Mutation     | SNP | 37 |
| 4 | GPR20     | uc003ywf.3 | Missense_Mutation     | SNP | 37 |
| 4 | EXOC8     | uc001huq.3 | Silent                | SNP | 37 |
| 4 | ADNP2     | uc002lnw.3 | Missense_Mutation     | SNP | 37 |
| 4 | NOTCH3    | uc002nan.3 | Missense_Mutation     | SNP | 37 |
| 4 | RTTN      | uc002lkp.2 | Missense_Mutation     | SNP | 37 |
| 4 | NOVA1     | uc001wpy.3 | Missense_Mutation     | SNP | 37 |
| 4 | MOB2      | uc010qwz.2 | Silent                | SNP | 37 |
| 4 | DDX60L    | uc021xuh.1 | Missense_Mutation     | SNP | 37 |

|   |          |            |                   |     |    |
|---|----------|------------|-------------------|-----|----|
| 4 | MLL3     | uc003wla.3 | Missense_Mutation | SNP | 37 |
| 4 | ZNF711   | uc011mqy.1 | 5'UTR             | SNP | 37 |
| 4 | CELSR2   | uc001dxa.4 | Missense_Mutation | SNP | 37 |
| 4 | C12orf51 | uc021reb.1 | Nonsense_Mutation | SNP | 37 |
| 4 | GATM     | uc010uev.1 | Missense_Mutation | SNP | 37 |
| 4 | PCDHAC2  | uc003lic.2 | Missense_Mutation | SNP | 37 |
| 4 | RPGRIP1  | uc010aim.3 | 5'UTR             | SNP | 37 |
| 4 | CLDN10   | uc001vmh.2 | Missense_Mutation | SNP | 37 |
| 4 | F8       | uc004fmt.3 | Silent            | SNP | 37 |
| 4 | ARID2    | uc001ros.1 | Splice_Site       | SNP | 37 |
| 4 | ZNF750   | uc002kga.3 | Missense_Mutation | SNP | 37 |
| 4 | AGAP1    | uc002vvs.3 | Silent            | SNP | 37 |
| 4 | FER1L6   | uc003yqw.3 | Missense_Mutation | SNP | 37 |
| 4 | GIMAP7   | uc003whk.3 | Silent            | SNP | 37 |
| 4 | GUCY1A3  | uc003iov.3 | Missense_Mutation | SNP | 37 |
| 4 | YSK4     | uc002tui.4 | Missense_Mutation | SNP | 37 |
| 4 | MMRN1    | uc003hst.3 | Silent            | SNP | 37 |
| 4 | C1QL2    | uc002tlo.2 | Missense_Mutation | SNP | 37 |
| 4 | CASP6    | uc003hzn.1 | Silent            | SNP | 37 |
| 4 | FHDC1    | uc003inf.2 | Missense_Mutation | SNP | 37 |
| 4 | SLCO1B3  | uc010sil.2 | Silent            | SNP | 37 |
| 4 | INTS1    | uc003skn.2 | Missense_Mutation | SNP | 37 |
| 4 | BRCC3    | uc004fna.3 | Missense_Mutation | SNP | 37 |
| 4 | UBTFL1   | uc010rub.2 | Missense_Mutation | SNP | 37 |
| 4 | MXRA5    | uc004crg.4 | Missense_Mutation | SNP | 37 |
| 4 | OR7D4    | uc002mla.2 | Silent            | SNP | 37 |
| 4 | ELFN2    | uc003asq.4 | Silent            | SNP | 37 |
| 4 | NLRC5    | uc021tiu.1 | Missense_Mutation | SNP | 37 |
| 4 | IL4R     | uc002don.3 | Missense_Mutation | SNP | 37 |
| 4 | PDSS2    | uc003prt.2 | Missense_Mutation | SNP | 37 |
| 4 | KIAA1217 | uc001iru.4 | Missense_Mutation | SNP | 37 |
| 4 | NECAB3   | uc002wzn.4 | Silent            | SNP | 37 |
| 4 | MKX      | uc001ity.4 | Missense_Mutation | SNP | 37 |
| 4 | PPP3R2   | uc004bbr.3 | Silent            | SNP | 37 |
| 4 | PARP14   | uc003efq.4 | Missense_Mutation | SNP | 37 |
| 4 | COL4A4   | uc021vxr.1 | Missense_Mutation | SNP | 37 |
| 4 | ERBB4    | uc002veg.1 | Intron            | SNP | 37 |
| 4 | UPK3B    | uc003ufq.3 | Missense_Mutation | SNP | 37 |
| 4 | PDE6H    | uc001rcr.3 | 3'UTR             | SNP | 37 |
| 4 | DCDC5    | uc009yjk.1 | Missense_Mutation | SNP | 37 |
| 4 | TOX3     | uc002egw.2 | Silent            | SNP | 37 |
| 4 | CSMD3    | uc003ynu.3 | Missense_Mutation | SNP | 37 |
| 4 | LILRB3   | uc002qfd.3 | Missense_Mutation | SNP | 37 |

|   |          |            |                   |     |    |
|---|----------|------------|-------------------|-----|----|
| 4 | BAI1     | uc003ywm.3 | Silent            | SNP | 37 |
| 4 | PIN1     | uc002mml.2 | Silent            | SNP | 37 |
| 4 | ART3     | uc010ija.2 | Missense_Mutation | SNP | 37 |
| 4 | CR1      | uc001hfx.3 | Missense_Mutation | SNP | 37 |
| 4 | GARS     | uc003tbm.3 | Missense_Mutation | SNP | 37 |
| 4 | IDH2     | uc002box.3 | Missense_Mutation | SNP | 37 |
| 4 | OR2A12   | uc011kty.2 | Silent            | SNP | 37 |
| 4 | EMR4P    | uc010xjk.2 | Intron            | SNP | 37 |
| 4 | DNAH8    | uc021yzh.1 | Missense_Mutation | SNP | 37 |
| 4 | TMPRSS4  | uc021qrd.1 | Missense_Mutation | SNP | 37 |
| 4 | TEAD2    | uc002pnh.3 | Silent            | SNP | 37 |
| 4 | SLC22A16 | uc003puf.3 | Silent            | SNP | 37 |
| 4 | CCDC39   | uc010hxe.3 | Missense_Mutation | SNP | 37 |
| 4 | ABCB4    | uc003uiv.1 | Missense_Mutation | SNP | 37 |
| 4 | C6       | uc003jmk.2 | Splice_Site       | SNP | 37 |
| 4 | ZNF429   | uc002nqd.1 | Missense_Mutation | SNP | 37 |
| 4 | PARS2    | uc001cxy.3 | Silent            | SNP | 37 |
| 4 | OR6N2    | uc010pir.2 | Silent            | SNP | 37 |
| 4 | SPTB     | uc001xhr.3 | Silent            | SNP | 37 |
| 4 | GPCPD1   | uc002wme.4 | Missense_Mutation | SNP | 37 |
| 4 | SCN9A    | uc010fpl.3 | Missense_Mutation | SNP | 37 |
| 4 | TMEM176A | uc003whx.1 | Silent            | SNP | 37 |
| 4 | TTN      | uc021vsy.1 | Missense_Mutation | SNP | 37 |
| 4 | SERPINB3 | uc002lji.3 | Missense_Mutation | SNP | 37 |
| 4 | ATP8A1   | uc003gwr.2 | Missense_Mutation | SNP | 37 |
| 4 | ZNF804A  | uc002uph.3 | Missense_Mutation | SNP | 37 |
| 4 | RPTOR    | uc002jyt.1 | Missense_Mutation | SNP | 37 |
| 4 | COG4     | uc002ezc.3 | 5'UTR             | SNP | 37 |
| 4 | SLC25A20 | uc003cva.4 | 3'UTR             | SNP | 37 |
| 4 | PKHD1L1  | uc003yne.3 | Missense_Mutation | SNP | 37 |
| 4 | COMMD10  | uc003krt.1 | Silent            | SNP | 37 |
| 4 | SPAM1    | uc003vle.3 | Missense_Mutation | SNP | 37 |
| 4 | DPEP1    | uc010cin.3 | Silent            | SNP | 37 |
| 4 | DCC      | uc002lfe.2 | Silent            | SNP | 37 |
| 4 | MLL2     | uc001rta.4 | Missense_Mutation | SNP | 37 |
| 4 | PSMD3    | uc002htn.1 | Silent            | SNP | 37 |
| 4 | PLA2G4C  | uc010xzd.2 | Missense_Mutation | SNP | 37 |
| 4 | FSTL5    | uc003iqh.3 | Missense_Mutation | SNP | 37 |
| 4 | PITPNM2  | uc001uej.1 | Missense_Mutation | SNP | 37 |
| 4 | EPS8L3   | uc001dyq.2 | Nonsense_Mutation | SNP | 37 |
| 4 | ANKRD12  | uc002knv.3 | Missense_Mutation | SNP | 37 |
| 4 | FCRL5    | uc009wsm.3 | Missense_Mutation | SNP | 37 |
| 4 | NLRP11   | uc010ygf.2 | Missense_Mutation | SNP | 37 |



|   |           |            |                       |     |    |
|---|-----------|------------|-----------------------|-----|----|
| 4 | ZNF566    | uc010xtf.2 | Missense_Mutation     | SNP | 37 |
| 4 | HFM1      | uc001doa.4 | Missense_Mutation     | SNP | 37 |
| 4 | EGF       | uc003hzy.4 | Nonsense_Mutation     | SNP | 37 |
| 4 | DSCR6     | uc002yvv.3 | Missense_Mutation     | SNP | 37 |
| 4 | PSG3      | uc002ovd.1 | Missense_Mutation     | SNP | 37 |
| 4 | LEPR      | uc001dci.3 | Missense_Mutation     | SNP | 37 |
| 4 | ADAM28    | uc003xdy.3 | Missense_Mutation     | SNP | 37 |
| 4 | ABCB10    | uc001htp.4 | Silent                | SNP | 37 |
| 4 | PRICKLE2  | uc003dmf.3 | Silent                | SNP | 37 |
| 4 | PDE4DIP   | uc001emd.2 | 3'UTR                 | SNP | 37 |
| 4 | HDGFRP2   | uc002mao.3 | Missense_Mutation     | SNP | 37 |
| 4 | RYR3      | uc001zhi.3 | Missense_Mutation     | SNP | 37 |
| 4 | PTPRT     | uc010ggj.3 | Silent                | SNP | 37 |
| 4 | LRFN4     | uc001ojr.3 | Missense_Mutation     | SNP | 37 |
| 4 | CASKIN1   | uc010bsg.1 | Silent                | SNP | 37 |
| 4 | DPP8      | uc002aov.3 | Missense_Mutation     | SNP | 37 |
| 4 | LOC650368 | uc010qxs.1 | Non-coding_Transcript | SNP | 37 |
| 4 | ROBO2     | uc003dpz.3 | Missense_Mutation     | SNP | 37 |
| 4 | DAAM1     | uc001xdz.1 | Missense_Mutation     | SNP | 37 |
| 4 | NLRP9     | uc002qly.3 | Missense_Mutation     | SNP | 37 |
| 4 | COL4A3    | uc002vom.2 | Missense_Mutation     | SNP | 37 |
| 4 | NCAN      | uc002nlz.3 | Missense_Mutation     | SNP | 37 |
| 4 | SOAT1     | uc001gml.3 | Silent                | SNP | 37 |
| 4 | PIP4K2A   | uc001irl.4 | Missense_Mutation     | SNP | 37 |
| 4 | MGAM      | uc003vwy.3 | Missense_Mutation     | SNP | 37 |
| 4 | MTHFD2L   | uc011cbk.2 | Nonsense_Mutation     | SNP | 37 |
| 4 | PSG11     | uc002ovm.1 | Missense_Mutation     | SNP | 37 |
| 4 | UGT2B10   | uc011cao.1 | Missense_Mutation     | SNP | 37 |
| 4 | FAM209B   | uc010zzh.2 | Missense_Mutation     | SNP | 37 |
| 4 | KLK13     | uc002pvn.3 | Missense_Mutation     | SNP | 37 |
| 4 | NUCKS1    | uc001hdb.3 | Missense_Mutation     | SNP | 37 |
| 4 | KIF17     | uc001bdr.4 | Missense_Mutation     | SNP | 37 |
| 4 | MAN1B1    | uc011mep.2 | Missense_Mutation     | SNP | 37 |
| 4 | DNAJC13   | uc003eor.3 | Missense_Mutation     | SNP | 37 |
| 4 | RBM44     | uc002vxi.4 | Missense_Mutation     | SNP | 37 |
| 4 | USP54     | uc001juo.3 | Silent                | SNP | 37 |
| 4 | TLR2      | uc003inq.3 | Missense_Mutation     | SNP | 37 |
| 4 | ETV3L     | uc001fqj.2 | Silent                | SNP | 37 |
| 4 | PLEKHG1   | uc011eem.1 | Missense_Mutation     | SNP | 37 |
| 4 | CCDC105   | uc002nae.2 | Missense_Mutation     | SNP | 37 |
| 4 | FSIP2     | uc002upl.3 | Missense_Mutation     | SNP | 37 |
| 4 | PATL1     | uc001noe.4 | Missense_Mutation     | SNP | 37 |
| 4 | OR2M3     | uc010pzg.2 | Missense_Mutation     | SNP | 37 |

|   |          |            |                   |     |    |
|---|----------|------------|-------------------|-----|----|
| 4 | SMG1     | uc002dfm.3 | Missense_Mutation | SNP | 37 |
| 4 | ABCC4    | uc001vmd.4 | Silent            | SNP | 37 |
| 4 | UNC79    | uc001ybv.1 | Missense_Mutation | SNP | 37 |
| 4 | MS4A7    | uc001npe.3 | 3'UTR             | SNP | 37 |
| 4 | TRIM55   | uc003xvv.3 | Missense_Mutation | SNP | 37 |
| 4 | C2orf57  | uc002vrz.3 | Silent            | SNP | 37 |
| 4 | NR1I3    | uc001fzp.3 | 5'UTR             | SNP | 37 |
| 4 | EPHA4    | uc002vmq.3 | 5'UTR             | SNP | 37 |
| 4 | PML      | uc002awv.3 | Silent            | SNP | 37 |
| 4 | RASGRP1  | uc001zke.4 | Missense_Mutation | SNP | 37 |
| 4 | TRIM74   | uc010lao.2 | Missense_Mutation | SNP | 37 |
| 4 | LAMA2    | uc021zfb.1 | Missense_Mutation | SNP | 37 |
| 4 | HHIP     | uc003ijs.2 | Silent            | SNP | 37 |
| 4 | PDGFRA   | uc003han.4 | Missense_Mutation | SNP | 37 |
| 4 | FAT4     | uc003ifj.4 | Missense_Mutation | SNP | 37 |
| 4 | PLXDC1   | uc002hrg.2 | Missense_Mutation | SNP | 37 |
| 4 | SZT2     | uc001cjk.2 | Missense_Mutation | SNP | 37 |
| 4 | BZRAP1   | uc002ivx.4 | Missense_Mutation | SNP | 37 |
| 4 | HACL1    | uc003caf.3 | Missense_Mutation | SNP | 37 |
| 4 | RPRD2    | uc009wlr.3 | Missense_Mutation | SNP | 37 |
| 4 | NDNF     | uc003idq.1 | Silent            | SNP | 37 |
| 4 | CASQ1    | uc010pja.2 | Missense_Mutation | SNP | 37 |
| 4 | PEX5     | uc010sgd.2 | 3'UTR             | SNP | 37 |
| 4 | DNAH3    | uc010vbe.2 | Silent            | SNP | 37 |
| 4 | RASGEF1B | uc003hmi.1 | Splice_Site       | SNP | 37 |
| 4 | SCUBE1   | uc003bdt.2 | Silent            | SNP | 37 |
| 4 | ADAM20   | uc001xme.3 | Nonsense_Mutation | SNP | 37 |
| 4 | FAM5B    | uc001glf.3 | Nonsense_Mutation | SNP | 37 |
| 4 | OR4D6    | uc010rku.2 | Missense_Mutation | SNP | 37 |
| 4 | ROR2     | uc004arj.2 | Nonsense_Mutation | SNP | 37 |
| 4 | DHCR7    | uc001oqk.3 | Silent            | SNP | 37 |
| 4 | KCNA5    | uc001qni.3 | Silent            | SNP | 37 |
| 4 | CPAMD8   | uc002nfb.3 | Nonsense_Mutation | SNP | 37 |
| 4 | CYFIP2   | uc021ygm.1 | Silent            | SNP | 37 |
| 4 | ETV6     | uc001qzz.3 | Missense_Mutation | SNP | 37 |
| 4 | FREM2    | uc001uwv.3 | Missense_Mutation | SNP | 37 |
| 4 | SLC41A2  | uc001tla.3 | Missense_Mutation | SNP | 37 |
| 4 | CST4     | uc002wto.1 | 3'UTR             | SNP | 37 |
| 4 | HDAC9    | uc003sui.3 | Silent            | SNP | 37 |
| 4 | EPB41L2  | uc003qch.2 | Silent            | SNP | 37 |
| 4 | SLC9A8   | uc002xuv.1 | Missense_Mutation | SNP | 37 |
| 4 | ACTRT2   | uc001ajz.3 | Silent            | SNP | 37 |
| 4 | NLRP13   | uc010ygg.2 | Missense_Mutation | SNP | 37 |

|   |           |            |                       |     |    |
|---|-----------|------------|-----------------------|-----|----|
| 4 | GGT1      | uc003aay.1 | 5'UTR                 | SNP | 37 |
| 4 | ANKDD1A   | uc002aoa.3 | Silent                | SNP | 37 |
| 4 | SOWAHB    | uc003hki.3 | Missense_Mutation     | SNP | 37 |
| 4 | UNC5D     | uc003xjr.2 | Missense_Mutation     | SNP | 37 |
| 4 | LAMP2     | uc004ess.4 | Splice_Site           | SNP | 37 |
| 4 | PRPS1L1   | uc003stz.3 | Missense_Mutation     | SNP | 37 |
| 4 | TLL2      | uc001kml.2 | Missense_Mutation     | SNP | 37 |
| 4 | RASAL1    | uc001tun.2 | Silent                | SNP | 37 |
| 4 | OIT3      | uc001jte.1 | Silent                | SNP | 37 |
| 4 | DDX55     | uc001ufk.3 | 5'UTR                 | SNP | 37 |
| 4 | A4GNT     | uc003ers.2 | Missense_Mutation     | SNP | 37 |
| 4 | NMU       | uc003hbc.3 | Missense_Mutation     | SNP | 37 |
| 4 | SCN3A     | uc002ucx.3 | Missense_Mutation     | SNP | 37 |
| 4 | SDHA      | uc011clv.1 | Intron                | SNP | 37 |
| 4 | VAPA      | uc002koj.3 | Missense_Mutation     | SNP | 37 |
| 4 | DNAH3     | uc010vbe.2 | Missense_Mutation     | SNP | 37 |
| 4 | C11orf63  | uc001pym.3 | Nonsense_Mutation     | SNP | 37 |
| 4 | CNBD1     | uc003ydy.2 | Missense_Mutation     | SNP | 37 |
| 4 | IL1R2     | uc002tbm.3 | Missense_Mutation     | SNP | 37 |
| 4 | ABCG1     | uc010gpb.2 | Silent                | SNP | 37 |
| 4 | DHFRL1    | uc003dri.3 | 5'UTR                 | SNP | 37 |
| 4 | CCBP2     | uc003cme.3 | Silent                | SNP | 37 |
| 4 | F7        | uc001vsv.3 | Missense_Mutation     | SNP | 37 |
| 4 | ALPK1     | uc003iap.4 | 5'UTR                 | SNP | 37 |
| 4 | CEP164    | uc001prc.3 | Missense_Mutation     | SNP | 37 |
| 4 | TGIF1     | uc002klw.3 | 5'UTR                 | SNP | 37 |
| 4 | HPS5      | uc001mod.1 | Silent                | SNP | 37 |
| 4 | NBEA      | uc021rid.1 | Silent                | SNP | 37 |
| 4 | SPRED2    | uc002sdr.4 | 3'UTR                 | SNP | 37 |
| 4 | ZNF705A   | uc001qud.1 | Missense_Mutation     | SNP | 37 |
| 4 | IGSF22    | uc009yht.2 | Missense_Mutation     | SNP | 37 |
| 4 | DCUN1D3   | uc002dhz.3 | Missense_Mutation     | SNP | 37 |
| 4 | ADAMTS13  | uc004cdv.4 | Missense_Mutation     | SNP | 37 |
| 4 | MS4A7     | uc001npe.3 | 3'UTR                 | SNP | 37 |
| 4 | TTLL4     | uc002viy.3 | Missense_Mutation     | SNP | 37 |
| 4 | TTLL6     | uc021tzm.1 | Silent                | SNP | 37 |
| 4 | ZCCHC4    | uc003grl.4 | Silent                | SNP | 37 |
| 4 | FAM150B   | uc002qwi.4 | Silent                | SNP | 37 |
| 4 | KIAA1324L | uc011kha.2 | Missense_Mutation     | SNP | 37 |
| 4 | OS9       | uc001spj.3 | Missense_Mutation     | SNP | 37 |
| 4 | CACNA1G   | uc002irk.1 | Missense_Mutation     | SNP | 37 |
| 4 | UGT2A3    | uc003hef.2 | Missense_Mutation     | SNP | 37 |
| 4 | ANKRD20A2 | uc010fhp.3 | Non-coding_Transcript | SNP | 37 |

|   |               |            |                   |     |    |
|---|---------------|------------|-------------------|-----|----|
| 4 | STK11         | uc002lrl.1 | Nonsense_Mutation | SNP | 37 |
| 4 | PI4K2A        | uc010qoy.1 | 5'UTR             | SNP | 37 |
| 4 | HEMGN         | uc004axy.3 | Missense_Mutation | SNP | 37 |
| 4 | GPX1          | uc021wxw.1 | Silent            | SNP | 37 |
| 4 | C6orf15       | uc003nsk.1 | Missense_Mutation | SNP | 37 |
| 4 | CCL21         | uc003zvo.3 | 3'UTR             | SNP | 37 |
| 4 | PCSK5         | uc004akc.2 | Missense_Mutation | SNP | 37 |
| 4 | CSMD1         | uc022aqr.1 | Splice_Site       | SNP | 37 |
| 4 | RTP4          | uc003frm.3 | Silent            | SNP | 37 |
| 4 | ARHGAP30      | uc001fxl.3 | Silent            | SNP | 37 |
| 4 | PDE4A         | uc002moj.2 | Missense_Mutation | SNP | 37 |
| 4 | OR7G3         | uc010xkl.2 | Silent            | SNP | 37 |
| 4 | CSMD1         | uc022aqr.1 | Missense_Mutation | SNP | 37 |
| 4 | LGI2          | uc003grf.2 | Missense_Mutation | SNP | 37 |
| 4 | SDK1          | uc003smx.3 | Missense_Mutation | SNP | 37 |
| 4 | GATM          | uc010uev.1 | Missense_Mutation | SNP | 37 |
| 4 | PFKFB1        | uc004dty.1 | Missense_Mutation | SNP | 37 |
| 4 | ANKS4B        | uc010bwp.1 | Silent            | SNP | 37 |
| 4 | PKHD1L1       | uc003yne.3 | Missense_Mutation | SNP | 37 |
| 4 | JA040725      | uc022bqs.1 | Intron            | SNP | 37 |
| 4 | SPINLW1-WFDC6 | uc002xov.2 | 3'UTR             | SNP | 37 |
| 4 | NEBL          | uc001iqi.3 | Missense_Mutation | SNP | 37 |
| 4 | EPHA1         | uc003wcz.3 | Missense_Mutation | SNP | 37 |
| 4 | PDZD2         | uc003jhl.3 | Silent            | SNP | 37 |
| 4 | MAP3K3        | uc002jbe.3 | Missense_Mutation | SNP | 37 |
| 4 | ACACA         | uc002hno.3 | Missense_Mutation | SNP | 37 |
| 4 | STOX1         | uc001jos.2 | Missense_Mutation | SNP | 37 |
| 4 | SST           | uc003frn.3 | 3'UTR             | SNP | 37 |
| 4 | MAP3K14       | uc002iiw.1 | Silent            | SNP | 37 |
| 4 | ZCCHC4        | uc003grl.4 | Missense_Mutation | SNP | 37 |
| 4 | ANGEL1        | uc001xsv.3 | Missense_Mutation | SNP | 37 |
| 4 | TGM4          | uc003coc.4 | Silent            | SNP | 37 |
| 4 | CCDC73        | uc001mtv.3 | Missense_Mutation | SNP | 37 |
| 4 | WTAP          | uc003qsl.3 | Silent            | SNP | 37 |
| 4 | C1orf87       | uc001czs.2 | Missense_Mutation | SNP | 37 |
| 4 | AHSG          | uc003fqk.4 | Missense_Mutation | SNP | 37 |
| 4 | TMPRSS11B     | uc003hdw.4 | 5'UTR             | SNP | 37 |
| 4 | FAT4          | uc003ifj.4 | Silent            | SNP | 37 |
| 4 | SOHLH1        | uc010nbe.3 | Nonsense_Mutation | SNP | 37 |
| 4 | DSG1          | uc002kwp.3 | Silent            | SNP | 37 |
| 4 | NUP210        | uc003bxv.1 | Missense_Mutation | SNP | 37 |
| 4 | LCP1          | uc001vaz.4 | Silent            | SNP | 37 |
| 4 | ZNF518B       | uc003gmn.3 | Silent            | SNP | 37 |

|   |              |            |                   |     |    |
|---|--------------|------------|-------------------|-----|----|
| 4 | BDKRB2       | uc010avm.1 | Silent            | SNP | 37 |
| 4 | PTRH1        | uc004bro.3 | 5'UTR             | SNP | 37 |
| 4 | ATP5J2-PTCD1 | uc011kiw.2 | Silent            | SNP | 37 |
| 4 | CYP4F8       | uc002nbi.3 | Missense_Mutation | SNP | 37 |
| 4 | OVOS2        | uc010sjy.1 | Missense_Mutation | SNP | 37 |
| 4 | SRPK2        | uc003vcv.3 | Missense_Mutation | SNP | 37 |
| 4 | MAPK4        | uc002lev.3 | 3'UTR             | SNP | 37 |
| 4 | SLC6A1       | uc010hdq.3 | 3'UTR             | SNP | 37 |
| 4 | PCDHB2       | uc003lil.3 | 3'UTR             | SNP | 37 |
| 4 | ZFP106       | uc001zpw.3 | Missense_Mutation | SNP | 37 |
| 4 | ALOX5        | uc001jce.3 | Missense_Mutation | SNP | 37 |
| 4 | SEPT6        | uc011mtw.1 | Missense_Mutation | SNP | 37 |
| 4 | EFTUD1       | uc002bgt.1 | Missense_Mutation | SNP | 37 |
| 4 | RP1          | uc003xsd.1 | Silent            | SNP | 37 |
| 4 | MACROD2      | uc002wou.3 | Splice_Site       | SNP | 37 |
| 4 | ALPI         | uc002vst.4 | Silent            | SNP | 37 |
| 4 | SNORD114-19  | uc001yjj.3 | 5'Flank           | SNP | 37 |
| 4 | SYT4         | uc002law.3 | Missense_Mutation | SNP | 37 |
| 4 | COL4A3       | uc002vom.2 | Silent            | SNP | 37 |
| 4 | GLRA3        | uc003ity.1 | Missense_Mutation | SNP | 37 |
| 4 | ZNF772       | uc002qot.3 | Silent            | SNP | 37 |
| 4 | CPA6         | uc003xxq.4 | Missense_Mutation | SNP | 37 |
| 4 | CD8B         | uc002srw.3 | Silent            | SNP | 37 |
| 4 | USP47        | uc001mjs.3 | Missense_Mutation | SNP | 37 |
| 4 | RHPN2        | uc002nuf.3 | Missense_Mutation | SNP | 37 |
| 4 | CHRN3        | uc003xpi.1 | Silent            | SNP | 37 |
| 4 | COL4A2       | uc001vqx.3 | Silent            | SNP | 37 |
| 4 | MUC16        | uc002mkp.3 | Missense_Mutation | SNP | 37 |
| 4 | LIMK1        | uc003uaa.2 | Silent            | SNP | 37 |
| 4 | ZNF264       | uc002qob.3 | Missense_Mutation | SNP | 37 |
| 4 | ZNF699       | uc002mlc.1 | Missense_Mutation | SNP | 37 |
| 4 | OGDHL        | uc009xog.3 | Silent            | SNP | 37 |
| 4 | ZNF331       | uc002qbx.1 | Silent            | SNP | 37 |
| 4 | ALPL         | uc001bet.3 | Silent            | SNP | 37 |
| 4 | FAM53A       | uc021xkk.1 | Missense_Mutation | SNP | 37 |
| 4 | ADD2         | uc021vjc.1 | Silent            | SNP | 37 |
| 4 | RNF5P1       | uc003xly.3 | Missense_Mutation | SNP | 37 |
| 4 | SORBS3       | uc003xbv.3 | Nonsense_Mutation | SNP | 37 |
| 4 | MUC17        | uc003uxp.1 | Missense_Mutation | SNP | 37 |
| 4 | ZNF883       | uc011lwy.2 | Silent            | SNP | 37 |
| 4 | KCNIP4       | uc021xmt.1 | Splice_Site       | SNP | 37 |
| 4 | YIPF7        | uc021xnx.1 | Missense_Mutation | SNP | 37 |
| 4 | WDR20        | uc010txu.2 | Missense_Mutation | SNP | 37 |

|   |           |            |                       |     |    |
|---|-----------|------------|-----------------------|-----|----|
| 4 | MEFV      | uc002cun.1 | Silent                | SNP | 37 |
| 4 | ZNF143    | uc001mhr.3 | Missense_Mutation     | SNP | 37 |
| 4 | C3        | uc002mfm.3 | Nonsense_Mutation     | SNP | 37 |
| 4 | FCF1      | uc001xqh.3 | Nonsense_Mutation     | SNP | 37 |
| 4 | DNAH5     | uc003jfd.2 | Missense_Mutation     | SNP | 37 |
| 4 | ST18      | uc003xqz.2 | Missense_Mutation     | SNP | 37 |
| 4 | TRPC6     | uc001pgk.4 | 3'UTR                 | SNP | 37 |
| 4 | COL4A3    | uc002vom.2 | Missense_Mutation     | SNP | 37 |
| 4 | AKAP11    | uc001uys.2 | Silent                | SNP | 37 |
| 4 | TNN       | uc001gkl.1 | Silent                | SNP | 37 |
| 4 | MED13L    | uc001tvw.3 | Missense_Mutation     | SNP | 37 |
| 4 | EPX       | uc002ivq.3 | Silent                | SNP | 37 |
| 4 | KIF16B    | uc010gci.2 | Silent                | SNP | 37 |
| 4 | KDR       | uc003has.3 | Silent                | SNP | 37 |
| 4 | GPR37L1   | uc001gxj.3 | Missense_Mutation     | SNP | 37 |
| 4 | ARL6      | uc003drv.3 | 3'UTR                 | SNP | 37 |
| 4 | DAPK1     | uc004apc.3 | Missense_Mutation     | SNP | 37 |
| 4 | LAMA2     | uc021zfb.1 | Silent                | SNP | 37 |
| 4 | DCLK3     | uc003cgi.2 | Silent                | SNP | 37 |
| 4 | BNC1      | uc002bjt.1 | Silent                | SNP | 37 |
| 4 | YES1      | uc002kky.3 | Missense_Mutation     | SNP | 37 |
| 4 | DENND2A   | uc010lnj.3 | Missense_Mutation     | SNP | 37 |
| 4 | TCRA      | uc010tmm.2 | Missense_Mutation     | SNP | 37 |
| 4 | DLEC1     | uc003chp.1 | Silent                | SNP | 37 |
| 4 | MGC70870  | uc002kgk.4 | Non-coding_Transcript | SNP | 37 |
| 5 | HIST1H2BO | uc003nkc.1 | In_Frame_Del          | DEL | 37 |
| 5 | SGK1      | uc003qeo.4 | Frame_Shift_Ins       | INS | 37 |
| 5 | MUC5B     | uc001lta.3 | Frame_Shift_Ins       | INS | 37 |
| 5 | EXPH5     | uc001pkk.3 | Frame_Shift_Del       | DEL | 37 |
| 5 | MSS51     | uc009xrh.3 | 3'UTR                 | SNP | 37 |
| 5 | OR12D3    | uc003nme.3 | Missense_Mutation     | SNP | 37 |
| 5 | OTOG      | uc001mnh.1 | Missense_Mutation     | SNP | 37 |
| 5 | BRAF      | uc003vwc.4 | Missense_Mutation     | SNP | 37 |
| 5 | TMEM18    | uc002qwl.3 | Missense_Mutation     | SNP | 37 |
| 5 | DLX6      | uc022ahu.1 | Missense_Mutation     | SNP | 37 |
| 5 | BAIAP2    | uc002jze.2 | Silent                | SNP | 37 |
| 5 | GPR31     | uc011egq.2 | Silent                | SNP | 37 |
| 5 | ALDH16A1  | uc002pnt.3 | 5'UTR                 | SNP | 37 |
| 5 | POFUT2    | uc002zhc.3 | Silent                | SNP | 37 |
| 5 | BOD1L2    | uc002lgm.3 | Silent                | SNP | 37 |
| 5 | HCRTR2    | uc010jzw.1 | 5'UTR                 | SNP | 37 |
| 5 | RC3H2     | uc010mwc.1 | Silent                | SNP | 37 |
| 5 | CTTNBP2   | uc003vjf.3 | Silent                | SNP | 37 |

|   |          |            |                       |     |    |
|---|----------|------------|-----------------------|-----|----|
| 5 | EDIL3    | uc003kio.1 | Missense_Mutation     | SNP | 37 |
| 5 | UQCC     | uc010gfd.2 | 3'UTR                 | SNP | 37 |
| 5 | SKIL     | uc003fgu.3 | Silent                | SNP | 37 |
| 5 | DLGAP1   | uc002kmf.3 | Intron                | SNP | 37 |
| 5 | EMBP1    | uc009wht.1 | 3'UTR                 | SNP | 37 |
| 5 | ADORA2A  | uc002zzx.3 | Intron                | SNP | 37 |
| 5 | RAP2C    | uc004ewp.3 | Silent                | SNP | 37 |
| 5 | OR8I2    | uc010rix.2 | Missense_Mutation     | SNP | 37 |
| 5 | ARMC5    | uc010vfo.2 | 5'UTR                 | SNP | 37 |
| 5 | CCDC168  | uc001vpm.3 | Silent                | SNP | 37 |
| 5 | C12orf77 | uc001rgf.3 | 3'UTR                 | SNP | 37 |
| 5 | TRHDE    | uc001sxa.3 | Nonsense_Mutation     | SNP | 37 |
| 5 | ZCRB1    | uc001rmz.3 | Nonsense_Mutation     | SNP | 37 |
| 5 | ZSCAN5A  | uc002qmr.3 | Missense_Mutation     | SNP | 37 |
| 5 | TLX3     | uc003mbf.3 | Missense_Mutation     | SNP | 37 |
| 5 | TPTE     | uc002yis.1 | Non-coding_Transcript | SNP | 37 |
| 5 | AK302511 | uc002fqz.2 | 5'UTR                 | SNP | 37 |
| 5 | TRPM4    | uc002pmw.3 | Missense_Mutation     | SNP | 37 |
| 5 | DPRX     | uc002qcf.1 | Missense_Mutation     | SNP | 37 |
| 5 | ZNF862   | uc010lpn.3 | Silent                | SNP | 37 |
| 5 | FARP1    | uc001vnh.3 | Silent                | SNP | 37 |
| 5 | SYT6     | uc021osa.1 | Silent                | SNP | 37 |
| 5 | MYCBPAP  | uc010wmr.2 | Missense_Mutation     | SNP | 37 |
| 5 | HFE      | uc003nfx.1 | Silent                | SNP | 37 |
| 5 | TTN      | uc021vsy.1 | Silent                | SNP | 37 |
| 5 | NAGPA    | uc002cyg.3 | Missense_Mutation     | SNP | 37 |
| 5 | C15orf26 | uc002bgb.3 | 3'UTR                 | SNP | 37 |
| 5 | DIP2A    | uc002zjn.3 | Silent                | SNP | 37 |
| 5 | FPR2     | uc002pxr.3 | Silent                | SNP | 37 |
| 5 | DGKZ     | uc010rgr.2 | Missense_Mutation     | SNP | 37 |
| 5 | ADCK3    | uc001hqm.1 | Missense_Mutation     | SNP | 37 |
| 5 | PRAMEF18 | uc009vnu.1 | Missense_Mutation     | SNP | 37 |
| 5 | PRSS55   | uc003wta.3 | Missense_Mutation     | SNP | 37 |
| 5 | CASZ1    | uc001aro.3 | Missense_Mutation     | SNP | 37 |
| 5 | CLCN3    | uc003ish.3 | Silent                | SNP | 37 |
| 5 | ADRA1B   | uc003lxt.1 | Silent                | SNP | 37 |
| 5 | GDF5     | uc010gfc.1 | Nonsense_Mutation     | SNP | 37 |
| 5 | ROBO1    | uc003dqe.2 | Missense_Mutation     | SNP | 37 |
| 5 | C2CD4C   | uc002loo.3 | Missense_Mutation     | SNP | 37 |
| 5 | BAD      | uc001nzd.3 | 3'UTR                 | SNP | 37 |
| 5 | XIRP2    | uc002udx.3 | Missense_Mutation     | SNP | 37 |
| 5 | EPX      | uc002ivq.3 | Silent                | SNP | 37 |
| 5 | MSRA     | uc003wsx.3 | Missense_Mutation     | SNP | 37 |

|   |           |            |                       |     |    |
|---|-----------|------------|-----------------------|-----|----|
| 5 | CBX2      | uc002jxc.3 | Missense_Mutation     | SNP | 37 |
| 5 | VWA3B     | uc002syo.3 | Missense_Mutation     | SNP | 37 |
| 5 | RELN      | uc022ajr.1 | Silent                | SNP | 37 |
| 5 | PKD1L2    | uc002fgh.1 | Nonsense_Mutation     | SNP | 37 |
| 5 | SLC7A4    | uc002zud.3 | Silent                | SNP | 37 |
| 5 | SLC38A1   | uc009zjk.1 | 5'UTR                 | SNP | 37 |
| 5 | MAP3K6    | uc001bny.1 | Missense_Mutation     | SNP | 37 |
| 5 | GOLGA6L2  | uc021sfy.1 | Missense_Mutation     | SNP | 37 |
| 5 | RHOBTB1   | uc001jli.3 | Silent                | SNP | 37 |
| 5 | B4GALNT2  | uc002ion.2 | Missense_Mutation     | SNP | 37 |
| 5 | LOC341056 | uc010rzt.2 | Non-coding_Transcript | SNP | 37 |
| 5 | NAV2      | uc001mpt.2 | 5'UTR                 | SNP | 37 |
| 5 | OR4K15    | uc010tkx.2 | Silent                | SNP | 37 |
| 5 | CCT3      | uc001fol.2 | 5'UTR                 | SNP | 37 |
| 5 | NCAPG2    | uc011kwe.1 | Missense_Mutation     | SNP | 37 |
| 5 | APOBR     | uc002dqb.2 | 3'UTR                 | SNP | 37 |
| 5 | CDH9      | uc003jgs.1 | Missense_Mutation     | SNP | 37 |
| 5 | DACH1     | uc021rkj.1 | Silent                | SNP | 37 |
| 5 | MNDA      | uc001fsz.1 | Missense_Mutation     | SNP | 37 |
| 5 | CCDC108   | uc010zkp.1 | 3'UTR                 | SNP | 37 |
| 5 | CCDC105   | uc002nae.2 | 5'UTR                 | SNP | 37 |
| 5 | DNAJA2    | uc002eeo.2 | 5'UTR                 | SNP | 37 |
| 5 | TDRD3     | uc010aeg.3 | Missense_Mutation     | SNP | 37 |
| 5 | MTMR8     | uc004dvs.3 | Missense_Mutation     | SNP | 37 |
| 5 | C2orf16   | uc002rkz.4 | Missense_Mutation     | SNP | 37 |
| 5 | RELN      | uc022ajr.1 | Missense_Mutation     | SNP | 37 |
| 5 | PRRG3     | uc022cgt.1 | Nonsense_Mutation     | SNP | 37 |
| 5 | RASA2     | uc010huq.1 | Nonsense_Mutation     | SNP | 37 |
| 5 | ACAD10    | uc009zvx.3 | Intron                | SNP | 37 |
| 5 | GPIHBP1   | uc003yxu.2 | Missense_Mutation     | SNP | 37 |
| 5 | LRRC32    | uc001oxq.4 | Silent                | SNP | 37 |
| 5 | DNAH14    | uc001how.2 | Splice_Site           | SNP | 37 |
| 5 | FCRL6     | uc001fud.4 | Missense_Mutation     | SNP | 37 |
| 5 | ZNF471    | uc002qnh.3 | 3'UTR                 | SNP | 37 |
| 5 | IDS       | uc011mxe.2 | Nonsense_Mutation     | SNP | 37 |
| 5 | GLIS2     | uc002cwc.1 | Missense_Mutation     | SNP | 37 |
| 5 | PLXNA4    | uc003vra.4 | Missense_Mutation     | SNP | 37 |
| 5 | MGC16703  | uc002zty.4 | Non-coding_Transcript | SNP | 37 |
| 5 | KCNH7     | uc002uci.3 | Silent                | SNP | 37 |
| 5 | UBE2O     | uc002jrm.4 | Missense_Mutation     | SNP | 37 |
| 5 | IL1RL1    | uc002tbu.1 | Missense_Mutation     | SNP | 37 |
| 5 | USHBP1    | uc002nfs.1 | Splice_Site           | SNP | 37 |
| 5 | OR2C1     | uc002cuw.1 | Missense_Mutation     | SNP | 37 |



|   |              |            |                   |     |    |
|---|--------------|------------|-------------------|-----|----|
| 5 | KCNH2        | uc003wic.3 | Missense_Mutation | SNP | 37 |
| 5 | SERPINB2     | uc010xev.2 | Silent            | SNP | 37 |
| 5 | FOXB1        | uc002agj.1 | Silent            | SNP | 37 |
| 5 | NLRP3        | uc001icr.3 | Missense_Mutation | SNP | 37 |
| 5 | PITPNM3      | uc002gdd.4 | Silent            | SNP | 37 |
| 5 | MUC16        | uc002mkp.3 | Missense_Mutation | SNP | 37 |
| 5 | EP400        | uc001ujn.3 | Missense_Mutation | SNP | 37 |
| 5 | C19orf31     | uc002mbn.1 | 3'UTR             | SNP | 37 |
| 5 | PCDHGC5      | uc003lju.2 | Silent            | SNP | 37 |
| 5 | ZNF534       | uc002pzk.3 | Missense_Mutation | SNP | 37 |
| 5 | DOCK11       | uc004eqp.2 | Missense_Mutation | SNP | 37 |
| 5 | DAB2IP       | uc004bln.3 | Missense_Mutation | SNP | 37 |
| 5 | CDH26        | uc002ybe.3 | Missense_Mutation | SNP | 37 |
| 5 | PNMA2        | uc003xez.2 | Silent            | SNP | 37 |
| 5 | ACSF3        | uc010cig.2 | 3'UTR             | SNP | 37 |
| 5 | CFH          | uc001gtj.4 | Missense_Mutation | SNP | 37 |
| 5 | PKD1         | uc002cos.1 | Missense_Mutation | SNP | 37 |
| 5 | FAT3         | uc001pdj.4 | Missense_Mutation | SNP | 37 |
| 5 | TSPAN16      | uc002mqv.1 | Intron            | SNP | 37 |
| 5 | ILDR2        | uc001gdx.2 | Splice_Site       | SNP | 37 |
| 5 | TTN          | uc021vsy.1 | Silent            | SNP | 37 |
| 5 | UQCC         | uc010gfd.2 | 3'UTR             | SNP | 37 |
| 5 | MC3R         | uc002xxb.2 | 5'UTR             | SNP | 37 |
| 5 | LRIT2        | uc010qmc.2 | Silent            | SNP | 37 |
| 5 | OR51G2       | uc001lzt.1 | Silent            | SNP | 37 |
| 5 | TSPAN8       | uc009zrt.1 | 5'UTR             | SNP | 37 |
| 5 | ZNF496       | uc009xgv.3 | Silent            | SNP | 37 |
| 5 | CYTH4        | uc003arf.3 | 3'UTR             | SNP | 37 |
| 5 | LOC100130581 | uc010wie.2 | Intron            | SNP | 37 |
| 5 | C8orf33      | uc003zfc.4 | 3'UTR             | SNP | 37 |
| 5 | SNED1        | uc002wah.1 | Missense_Mutation | SNP | 37 |
| 5 | RTL1         | uc010txj.1 | Nonsense_Mutation | SNP | 37 |
| 5 | TSHZ2        | uc002xwo.3 | Missense_Mutation | SNP | 37 |
| 5 | ABCC1        | uc010bvi.3 | Missense_Mutation | SNP | 37 |
| 5 | LAMP5        | uc002wni.2 | Missense_Mutation | SNP | 37 |
| 5 | CDH23        | uc001jsc.1 | Missense_Mutation | SNP | 37 |
| 5 | MUC16        | uc002mkp.3 | Missense_Mutation | SNP | 37 |
| 5 | RHPN1        | uc003yyb.3 | Missense_Mutation | SNP | 37 |
| 5 | TBXA2R       | uc021umv.1 | Silent            | SNP | 37 |
| 5 | CLU          | uc003xfy.2 | Silent            | SNP | 37 |
| 5 | KCNH7        | uc002uch.2 | Splice_Site       | SNP | 37 |
| 5 | RPS11        | uc002pob.1 | 5'UTR             | SNP | 37 |
| 5 | MORC4        | uc004emu.4 | Silent            | SNP | 37 |

|   |             |            |                       |     |    |
|---|-------------|------------|-----------------------|-----|----|
| 5 | WNK3        | uc004dte.2 | Missense_Mutation     | SNP | 37 |
| 5 | TUFT1       | uc010pdf.2 | 3'UTR                 | SNP | 37 |
| 5 | SLCO1B1     | uc001req.4 | Missense_Mutation     | SNP | 37 |
| 5 | Unknown     |            | IGR                   | SNP | 37 |
| 5 | POTEF       | uc010fmh.2 | 3'UTR                 | SNP | 37 |
| 5 | LRIT3       | uc003hze.4 | Missense_Mutation     | SNP | 37 |
| 5 | TTN         | uc021vsy.1 | Intron                | SNP | 37 |
| 5 | RAB41       | uc010nkv.3 | Missense_Mutation     | SNP | 37 |
| 5 | SNORD115-14 | uc001yzj.1 | 5'Flank               | SNP | 37 |
| 5 | IFT88       | uc001unh.3 | Missense_Mutation     | SNP | 37 |
| 5 | DCDC5       | uc009yjk.1 | Silent                | SNP | 37 |
| 5 | ODZ3        | uc003ivd.1 | Missense_Mutation     | SNP | 37 |
| 5 | RPAP1       | uc001zod.3 | Silent                | SNP | 37 |
| 5 | CSMD1       | uc022aqr.1 | Silent                | SNP | 37 |
| 5 | WAS         | uc004dkm.4 | Missense_Mutation     | SNP | 37 |
| 5 | PXN         | uc001txv.3 | Silent                | SNP | 37 |
| 5 | SNTG1       | uc010lxy.1 | Missense_Mutation     | SNP | 37 |
| 5 | ADAMTS20    | uc010skx.2 | Silent                | SNP | 37 |
| 5 | ABCA12      | uc002vew.3 | Missense_Mutation     | SNP | 37 |
| 5 | DPY19L2P2   | uc003vbh.4 | Missense_Mutation     | SNP | 37 |
| 5 | CD1A        | uc001frt.3 | Missense_Mutation     | SNP | 37 |
| 5 | CTSL3       | uc004apm.1 | Missense_Mutation     | SNP | 37 |
| 5 | TPP1        | uc001mel.1 | Missense_Mutation     | SNP | 37 |
| 5 | DIO3AS      | uc001ykf.3 | 3'UTR                 | SNP | 37 |
| 5 | SOGA1       | uc002xgd.1 | 3'UTR                 | SNP | 37 |
| 5 | BMPER       | uc011kap.2 | Missense_Mutation     | SNP | 37 |
| 5 | CD70        | uc010xjf.1 | Missense_Mutation     | SNP | 37 |
| 5 | TTBK2       | uc001zqo.2 | Intron                | SNP | 37 |
| 5 | CES1        | uc002eil.3 | Missense_Mutation     | SNP | 37 |
| 5 | COL6A5      | uc010htj.1 | Missense_Mutation     | SNP | 37 |
| 5 | SIGLEC14    | uc002pxf.4 | Silent                | SNP | 37 |
| 5 | PIPSL       | uc009xuj.2 | Missense_Mutation     | SNP | 37 |
| 5 | LYPD3       | uc002owm.3 | Nonsense_Mutation     | SNP | 37 |
| 5 | DNAH14      | uc001how.2 | Silent                | SNP | 37 |
| 5 | LCT         | uc002tuu.1 | Missense_Mutation     | SNP | 37 |
| 5 | ZNF720      | uc002ecq.3 | 3'UTR                 | SNP | 37 |
| 5 | CCDC69      | uc003ltq.3 | 3'UTR                 | SNP | 37 |
| 5 | ZFPM1       | uc002fkv.3 | Missense_Mutation     | SNP | 37 |
| 5 | TRIM31      | uc003npg.1 | Silent                | SNP | 37 |
| 5 | LOC284379   | uc021uzi.1 | 5'UTR                 | SNP | 37 |
| 5 | DPEP3       | uc002evc.4 | Missense_Mutation     | SNP | 37 |
| 5 | MIR1324     | uc021xar.1 | Non-coding_Transcript | SNP | 37 |
| 5 | MAG         | uc002nyy.2 | Splice_Site           | SNP | 37 |

|   |            |            |                       |     |    |
|---|------------|------------|-----------------------|-----|----|
| 5 | PARVG      | uc011aqe.2 | Intron                | SNP | 37 |
| 5 | CRTC1      | uc010ebv.3 | Missense_Mutation     | SNP | 37 |
| 5 | CLEC2B     | uc001qwn.3 | Missense_Mutation     | SNP | 37 |
| 5 | PRPH       | uc001rtu.3 | Silent                | SNP | 37 |
| 5 | INTS4      | uc001oys.3 | Nonsense_Mutation     | SNP | 37 |
| 5 | AQPEP      | uc003kro.3 | Silent                | SNP | 37 |
| 5 | RP1L1      | uc003wtc.3 | Silent                | SNP | 37 |
| 5 | CLEC4E     | uc001quo.1 | Missense_Mutation     | SNP | 37 |
| 5 | ASB6       | uc004byf.2 | 3'UTR                 | SNP | 37 |
| 5 | ZCCHC16    | uc004epo.1 | Missense_Mutation     | SNP | 37 |
| 5 | MED24      | uc002hts.3 | Silent                | SNP | 37 |
| 5 | SLC12A5    | uc010zxl.1 | Nonsense_Mutation     | SNP | 37 |
| 5 | OR2T27     | uc010pzo.2 | Silent                | SNP | 37 |
| 5 | BC080605   | uc004aex.3 | Non-coding_Transcript | SNP | 37 |
| 5 | CSMD1      | uc022aqr.1 | Silent                | SNP | 37 |
| 5 | HMGCLL1    | uc003pcn.3 | 3'UTR                 | SNP | 37 |
| 5 | CXorf30    | uc011mkc.2 | Missense_Mutation     | SNP | 37 |
| 5 | CATSPERB   | uc001xzs.1 | Missense_Mutation     | SNP | 37 |
| 5 | PCDH1      | uc003llp.3 | Missense_Mutation     | SNP | 37 |
| 5 | PGBD1      | uc003nky.3 | Silent                | SNP | 37 |
| 5 | SLC13A1    | uc003vkm.3 | Silent                | SNP | 37 |
| 5 | ENAM       | uc011caw.1 | Missense_Mutation     | SNP | 37 |
| 5 | ALLC       | uc010ewt.3 | Silent                | SNP | 37 |
| 5 | FCHO2      | uc003kcl.3 | Missense_Mutation     | SNP | 37 |
| 5 | ABCB10     | uc001htp.4 | Silent                | SNP | 37 |
| 5 | SETD6      | uc002ens.3 | 5'UTR                 | SNP | 37 |
| 5 | DGKZ       | uc001ncn.1 | Missense_Mutation     | SNP | 37 |
| 5 | KIAA0930   | uc003bfv.1 | Missense_Mutation     | SNP | 37 |
| 5 | XIRP1      | uc003cjk.2 | Silent                | SNP | 37 |
| 5 | MDH1B      | uc002vbs.3 | 3'UTR                 | SNP | 37 |
| 5 | BRSK1      | uc002qkf.3 | Missense_Mutation     | SNP | 37 |
| 5 | DLGAP2     | uc003wpl.3 | Missense_Mutation     | SNP | 37 |
| 5 | PTPRD      | uc003zkk.3 | Missense_Mutation     | SNP | 37 |
| 5 | ANKRD13A   | uc001tpx.3 | Missense_Mutation     | SNP | 37 |
| 5 | CDKN2AIPNL | uc011cxs.2 | Intron                | SNP | 37 |
| 5 | ZNF780A    | uc010xvh.2 | Missense_Mutation     | SNP | 37 |
| 5 | EXOC6B     | uc010fep.3 | Silent                | SNP | 37 |
| 5 | ROBO1      | uc003dqe.2 | Missense_Mutation     | SNP | 37 |
| 5 | BTBD16     | uc001lgc.1 | Splice_Site           | SNP | 37 |
| 5 | SPZ1       | uc003kgn.3 | 3'UTR                 | SNP | 37 |
| 5 | AKAP3      | uc001qnb.4 | Missense_Mutation     | SNP | 37 |
| 5 | MOSPD1     | uc004eyb.3 | Missense_Mutation     | SNP | 37 |
| 5 | CDH13      | uc010vns.2 | Missense_Mutation     | SNP | 37 |

|   |          |            |                   |     |    |
|---|----------|------------|-------------------|-----|----|
| 5 | ANKRD30A | uc021ppc.1 | Missense_Mutation | SNP | 37 |
| 5 | TMEM130  | uc003upo.3 | Silent            | SNP | 37 |
| 5 | PCDHB5   | uc003liq.3 | Silent            | SNP | 37 |
| 5 | S1PR5    | uc002mot.2 | Missense_Mutation | SNP | 37 |
| 5 | SMARCA1  | uc011muk.1 | Missense_Mutation | SNP | 37 |
| 5 | CACNG5   | uc010wqi.2 | Intron            | SNP | 37 |
| 5 | MAP4K4   | uc002tbc.3 | Missense_Mutation | SNP | 37 |
| 5 | ANGPT1   | uc003ymn.3 | Missense_Mutation | SNP | 37 |
| 5 | GSDMA    | uc002htl.1 | Silent            | SNP | 37 |
| 5 | ZNF780A  | uc010xvh.2 | Missense_Mutation | SNP | 37 |
| 5 | CACNB3   | uc001rsk.2 | 5'UTR             | SNP | 37 |
| 5 | ZNF275   | uc011myn.2 | 5'UTR             | SNP | 37 |
| 5 | ADAMTS15 | uc010scd.2 | Missense_Mutation | SNP | 37 |
| 5 | CSMD1    | uc022aqr.1 | Silent            | SNP | 37 |
| 5 | PHYHIP   | uc003xbk.4 | 3'UTR             | SNP | 37 |
| 5 | DPEP3    | uc002evc.4 | Missense_Mutation | SNP | 37 |
| 5 | ADAM10   | uc002afd.1 | 3'UTR             | SNP | 37 |
| 5 | SLITRK5  | uc001vln.3 | Missense_Mutation | SNP | 37 |
| 5 | WDR33    | uc002tpg.2 | Missense_Mutation | SNP | 37 |
| 5 | OR4C45   | uc010rhw.2 | Missense_Mutation | SNP | 37 |
| 5 | FAM186A  | uc001rwl.2 | Silent            | SNP | 37 |
| 5 | CACNA1S  | uc001gvv.3 | Silent            | SNP | 37 |
| 5 | WDR78    | uc001dcx.3 | Silent            | SNP | 37 |
| 5 | CLEC4D   | uc001qun.3 | 3'UTR             | SNP | 37 |
| 5 | CR627148 | uc004aec.3 | Intron            | SNP | 37 |
| 5 | RTL1     | uc010txj.1 | Silent            | SNP | 37 |
| 5 | PLXNA2   | uc001hgz.3 | Silent            | SNP | 37 |
| 5 | ZCCHC4   | uc003grl.4 | 5'UTR             | SNP | 37 |
| 5 | CACNA2D1 | uc003uhr.1 | Nonsense_Mutation | SNP | 37 |
| 5 | MED24    | uc002hts.3 | Missense_Mutation | SNP | 37 |
| 5 | ASPH     | uc003xuj.3 | Silent            | SNP | 37 |
| 5 | CCDC85A  | uc002rzn.3 | 3'UTR             | SNP | 37 |
| 5 | ATG16L1  | uc002vty.3 | 5'UTR             | SNP | 37 |
| 5 | ARHGAP5  | uc001wrl.3 | Missense_Mutation | SNP | 37 |
| 5 | PLCB4    | uc021wam.1 | Missense_Mutation | SNP | 37 |
| 5 | PARVG    | uc011aqe.2 | Intron            | SNP | 37 |
| 5 | MVP      | uc002dui.3 | 3'UTR             | SNP | 37 |
| 5 | RASSF7   | uc001lqb.3 | Silent            | SNP | 37 |
| 5 | PCBP2    | uc001sdc.4 | Missense_Mutation | SNP | 37 |
| 5 | GRIN2B   | uc001rbt.2 | Missense_Mutation | SNP | 37 |
| 5 | N4BP3    | uc003mik.1 | Silent            | SNP | 37 |
| 5 | PIK3R2   | uc002nia.1 | Missense_Mutation | SNP | 37 |
| 5 | HEATR4   | uc021rwe.1 | Missense_Mutation | SNP | 37 |

|   |           |            |                       |     |    |
|---|-----------|------------|-----------------------|-----|----|
| 5 | SLC4A11   | uc010zqe.2 | Missense_Mutation     | SNP | 37 |
| 5 | PDIA6     | uc002rav.3 | Missense_Mutation     | SNP | 37 |
| 5 | NPVF      | uc003sxo.3 | Silent                | SNP | 37 |
| 5 | RASGRF2   | uc003kha.2 | Silent                | SNP | 37 |
| 5 | EMB       | uc003jom.3 | Missense_Mutation     | SNP | 37 |
| 5 | ZNF705A   | uc022asa.1 | 3'UTR                 | SNP | 37 |
| 5 | DNAH5     | uc003jfd.2 | 5'UTR                 | SNP | 37 |
| 5 | SLC39A5   | uc010sqj.2 | Missense_Mutation     | SNP | 37 |
| 5 | ERCC2     | uc002pbj.2 | Missense_Mutation     | SNP | 37 |
| 5 | MYOF      | uc001kin.3 | Silent                | SNP | 37 |
| 5 | FTMT      | uc003kss.3 | Missense_Mutation     | SNP | 37 |
| 5 | BC063132  | uc011mgv.2 | Non-coding_Transcript | SNP | 37 |
| 5 | C12orf51  | uc021reb.1 | Missense_Mutation     | SNP | 37 |
| 5 | LRRCS5    | uc001njl.2 | Silent                | SNP | 37 |
| 5 | NAIP      | uc003jyj.1 | Missense_Mutation     | SNP | 37 |
| 5 | PCDHB2    | uc003lil.3 | Silent                | SNP | 37 |
| 5 | FAM105A   | uc003jfj.3 | Missense_Mutation     | SNP | 37 |
| 5 | IFI6      | uc001bon.1 | 5'UTR                 | SNP | 37 |
| 5 | FLT4      | uc003mlz.4 | Missense_Mutation     | SNP | 37 |
| 5 | CDH20     | uc010dps.1 | Missense_Mutation     | SNP | 37 |
| 5 | PSG3      | uc002ovd.1 | 3'UTR                 | SNP | 37 |
| 5 | POTEF     | uc010fmh.2 | Missense_Mutation     | SNP | 37 |
| 5 | CHRM2     | uc003vtf.1 | Missense_Mutation     | SNP | 37 |
| 5 | GK2       | uc003hlu.3 | Missense_Mutation     | SNP | 37 |
| 5 | KIAA1549  | uc011kql.2 | Missense_Mutation     | SNP | 37 |
| 5 | CAMK2B    | uc003tkn.2 | Missense_Mutation     | SNP | 37 |
| 5 | CCDC102B  | uc002lkk.2 | Missense_Mutation     | SNP | 37 |
| 5 | F5        | uc001ggg.1 | Missense_Mutation     | SNP | 37 |
| 5 | FGF13     | uc004faq.3 | 5'UTR                 | SNP | 37 |
| 5 | P2RY4     | uc004dxz.1 | Missense_Mutation     | SNP | 37 |
| 5 | PROKR2    | uc010zqw.2 | Silent                | SNP | 37 |
| 5 | OR4C45    | uc010rhw.2 | Missense_Mutation     | SNP | 37 |
| 5 | TMEM132B  | uc001uhe.1 | Silent                | SNP | 37 |
| 5 | LOC389831 | uc003woj.2 | 3'UTR                 | SNP | 37 |
| 5 | DEFB110   | uc003pac.3 | Missense_Mutation     | SNP | 37 |
| 5 | SIRPA     | uc002wft.3 | Missense_Mutation     | SNP | 37 |
| 5 | FMR1      | uc010nst.3 | 3'UTR                 | SNP | 37 |
| 5 | C8A       | uc001cyo.2 | Silent                | SNP | 37 |
| 5 | XIAP      | uc010nqu.3 | 3'UTR                 | SNP | 37 |
| 5 | PEG3      | uc002qnr.2 | Silent                | SNP | 37 |
| 5 | PMFBP1    | uc002fcc.4 | Missense_Mutation     | SNP | 37 |
| 5 | TRANK1    | uc003cgj.3 | Missense_Mutation     | SNP | 37 |
| 5 | ZNF257    | uc010ecx.3 | Missense_Mutation     | SNP | 37 |

|   |           |             |                       |     |    |
|---|-----------|-------------|-----------------------|-----|----|
| 5 | FAM83C    | uc021wck.1  | Missense_Mutation     | SNP | 37 |
| 5 | CYP2C8    | uc001kkb.3  | Missense_Mutation     | SNP | 37 |
| 5 | TTN       | uc021vsy.1  | Silent                | SNP | 37 |
| 5 | KIF15     | uc003cnx.4  | 5'UTR                 | SNP | 37 |
| 5 | AK7       | uc001yfn.2  | Missense_Mutation     | SNP | 37 |
| 5 | LIPF      | uc010qmt.2  | Missense_Mutation     | SNP | 37 |
| 5 | SPTBN2    | uc001ojd.3  | Silent                | SNP | 37 |
| 5 | CHD1      | uc003knf.3  | Missense_Mutation     | SNP | 37 |
| 5 | AK302511  | uc002fq.s.2 | 5'UTR                 | SNP | 37 |
| 5 | ZNF575    | uc002owq.3  | Silent                | SNP | 37 |
| 5 | P2RX1     | uc010ckm.1  | Missense_Mutation     | SNP | 37 |
| 5 | EML1      | uc001ygr.3  | Missense_Mutation     | SNP | 37 |
| 5 | TRAPPC12  | uc002qxm.1  | Silent                | SNP | 37 |
| 5 | SNRPN     | uc021sgb.1  | Missense_Mutation     | SNP | 37 |
| 5 | SERPINB13 | uc010xep.2  | Silent                | SNP | 37 |
| 5 | SCN3A     | uc002ucx.3  | Missense_Mutation     | SNP | 37 |
| 5 | AK308561  | uc010mng.1  | 5'Flank               | SNP | 37 |
| 5 | BC039000  | uc001izx.3  | Non-coding_Transcript | SNP | 37 |
| 5 | ASB17     | uc001dhe.2  | Missense_Mutation     | SNP | 37 |
| 5 | FAM127B   | uc004eyf.3  | Missense_Mutation     | SNP | 37 |
| 5 | DDR1      | uc003nrv.3  | Missense_Mutation     | SNP | 37 |
| 5 | GPR97     | uc002emh.3  | Missense_Mutation     | SNP | 37 |
| 5 | ALPK3     | uc002ble.3  | Missense_Mutation     | SNP | 37 |
| 5 | ZNF676    | uc002nqs.1  | 3'UTR                 | SNP | 37 |
| 5 | SYNE1     | uc021zhb.1  | Intron                | SNP | 37 |
| 5 | DMRTC2    | uc010xwe.2  | Missense_Mutation     | SNP | 37 |
| 5 | TCF20     | uc003bcj.1  | Silent                | SNP | 37 |
| 5 | WDR69     | uc002vpn.1  | 3'UTR                 | SNP | 37 |
| 5 | COBL      | uc003tps.3  | Missense_Mutation     | SNP | 37 |
| 5 | BBS2      | uc002ejd.2  | Missense_Mutation     | SNP | 37 |
| 5 | MTUS2     | uc001usl.4  | Missense_Mutation     | SNP | 37 |
| 5 | DNAH8     | uc021yzh.1  | Missense_Mutation     | SNP | 37 |
| 5 | CNTN5     | uc001pga.3  | Missense_Mutation     | SNP | 37 |
| 5 | ZNF320    | uc010eqi.1  | Non-coding_Transcript | SNP | 37 |
| 5 | FOXA3     | uc002pdr.3  | Silent                | SNP | 37 |
| 5 | CTIF      | uc002idd.3  | 3'UTR                 | SNP | 37 |
| 5 | FIGN      | uc002uck.1  | Missense_Mutation     | SNP | 37 |
| 5 | TNRC6C    | uc002jue.2  | 3'UTR                 | SNP | 37 |
| 5 | LOXHD1    | uc010xcw.1  | Missense_Mutation     | SNP | 37 |
| 5 | FAM65C    | uc010zyt.2  | Missense_Mutation     | SNP | 37 |
| 5 | SLC22A6   | uc001nwk.3  | Silent                | SNP | 37 |
| 5 | XIST      | uc004ebm.1  | Non-coding_Transcript | SNP | 37 |
| 5 | GRIK5     | uc002osj.1  | Missense_Mutation     | SNP | 37 |

|   |           |            |                       |     |    |
|---|-----------|------------|-----------------------|-----|----|
| 5 | TNR       | uc001gkp.1 | Missense_Mutation     | SNP | 37 |
| 5 | ATP8B4    | uc001zxu.3 | Missense_Mutation     | SNP | 37 |
| 5 | VWA3B     | uc002syo.3 | Intron                | SNP | 37 |
| 5 | NLRP13    | uc010ygg.2 | Missense_Mutation     | SNP | 37 |
| 5 | LOC388948 | uc021vgy.1 | Non-coding_Transcript | SNP | 37 |
| 5 | EPN3      | uc010wms.2 | Missense_Mutation     | SNP | 37 |
| 5 | C2CD3     | uc001out.3 | Non-coding_Transcript | SNP | 37 |
| 5 | PCBP2     | uc001sdc.4 | Missense_Mutation     | SNP | 37 |
| 5 | CR627148  | uc004aec.3 | Non-coding_Transcript | SNP | 37 |
| 5 | SNAP91    | uc021zcf.1 | Missense_Mutation     | SNP | 37 |
| 5 | LOC283788 | uc022brb.1 | Intron                | SNP | 37 |
| 5 | TBX20     | uc011kas.2 | Silent                | SNP | 37 |
| 5 | LOC283788 | uc022brb.1 | Intron                | SNP | 37 |
| 5 | OBSCN     | uc009xez.1 | Silent                | SNP | 37 |
| 5 | CTAGE1    | uc002ktv.1 | 3'UTR                 | SNP | 37 |
| 5 | XIST      | uc004ebm.1 | Non-coding_Transcript | SNP | 37 |
| 5 | UGT3A1    | uc003jiv.2 | Missense_Mutation     | SNP | 37 |
| 5 | EMG1      | uc001qsh.4 | 5'UTR                 | SNP | 37 |
| 5 | MUC16     | uc002mkp.3 | Missense_Mutation     | SNP | 37 |
| 5 | TDRD7     | uc004axj.3 | Missense_Mutation     | SNP | 37 |
| 5 | C5orf25   | uc003mds.4 | Missense_Mutation     | SNP | 37 |
| 5 | MUC3A     | uc003uxl.1 | Missense_Mutation     | SNP | 37 |
| 5 | GATA3     | uc001ijz.3 | 3'UTR                 | SNP | 37 |
| 5 | GRK1      | uc010tkf.2 | 3'UTR                 | SNP | 37 |
| 5 | CETN1     | uc002kko.1 | Missense_Mutation     | SNP | 37 |
| 5 | ART5      | uc001lyb.1 | Missense_Mutation     | SNP | 37 |
| 5 | BMP6      | uc003mxu.4 | Silent                | SNP | 37 |
| 5 | PAK3      | uc010npv.1 | Missense_Mutation     | SNP | 37 |
| 5 | PSMB7     | uc004boj.3 | Missense_Mutation     | SNP | 37 |
| 5 | FCER1G    | uc001fza.1 | 3'UTR                 | SNP | 37 |
| 5 | STK33     | uc001mgj.1 | Missense_Mutation     | SNP | 37 |
| 5 | DEF6      | uc003okk.3 | Silent                | SNP | 37 |
| 5 | BAD       | uc001nzd.3 | 3'UTR                 | SNP | 37 |
| 5 | TBX4      | uc010ddo.3 | Missense_Mutation     | SNP | 37 |
| 5 | BC128131  | uc002nqz.1 | Nonsense_Mutation     | SNP | 37 |
| 5 | SCN1A     | uc002udo.4 | Missense_Mutation     | SNP | 37 |
| 5 | GLDN      | uc002aba.3 | Missense_Mutation     | SNP | 37 |
| 5 | FMR1      | uc010nst.3 | 3'UTR                 | SNP | 37 |
| 5 | ZNF281    | uc001gve.3 | Missense_Mutation     | SNP | 37 |
| 5 | HSPBP1    | uc002qjx.3 | Silent                | SNP | 37 |
| 5 | LOC554223 | uc003nnt.3 | 5'Flank               | SNP | 37 |
| 5 | TERT      | uc003jcb.1 | Missense_Mutation     | SNP | 37 |
| 5 | CDK16     | uc011mlj.2 | 3'UTR                 | SNP | 37 |

|   |             |            |                   |     |    |
|---|-------------|------------|-------------------|-----|----|
| 5 | CEP170      | uc021plo.1 | Missense_Mutation | SNP | 37 |
| 5 | FCRL6       | uc001fud.4 | 5'Flank           | SNP | 37 |
| 5 | SERPINA5    | uc010ave.2 | 3'UTR             | SNP | 37 |
| 5 | VASH2       | uc001hgy.3 | 3'UTR             | SNP | 37 |
| 5 | SNORD114-31 | uc001yfv.3 | 5'Flank           | SNP | 37 |
| 5 | IQCF3       | uc021wyy.1 | Silent            | SNP | 37 |
| 5 | TRBV19      | uc003vzo.2 | 5'UTR             | SNP | 37 |
| 5 | SEC1        | uc010xzv.2 | Silent            | SNP | 37 |
| 5 | TAOK2       | uc010bzm.2 | Silent            | SNP | 37 |
| 5 | ITPRIPL1    | uc002svy.3 | Missense_Mutation | SNP | 37 |
| 5 | ARMC5       | uc010vfn.2 | Missense_Mutation | SNP | 37 |
| 5 | UNC13C      | uc021sms.1 | 3'UTR             | SNP | 37 |
| 5 | STARD9      | uc010udj.2 | Missense_Mutation | SNP | 37 |
| 5 | CCDC70      | uc001vfu.4 | Silent            | SNP | 37 |
| 5 | EIF2D       | uc001heh.2 | Silent            | SNP | 37 |
| 5 | TTN         | uc021vsy.1 | Missense_Mutation | SNP | 37 |
| 5 | PLCB1       | uc002wnb.3 | Silent            | SNP | 37 |
| 5 | ZDHHC1      | uc010vjm.2 | Silent            | SNP | 37 |
| 5 | APOBEC1     | uc001qtb.3 | Missense_Mutation | SNP | 37 |
| 5 | CDH12       | uc010iuc.2 | Silent            | SNP | 37 |
| 5 | GOLGA6A     | uc002axa.1 | Splice_Site       | SNP | 37 |
| 5 | KALRN       | uc003ehg.3 | Silent            | SNP | 37 |
| 5 | DYTN        | uc002vbr.1 | Silent            | SNP | 37 |
| 5 | SLC22A9     | uc001nww.3 | Silent            | SNP | 37 |
| 5 | ROCK1       | uc002kte.3 | Nonsense_Mutation | SNP | 37 |
| 5 | TRIM67      | uc009xfn.1 | 3'UTR             | SNP | 37 |
| 5 | TSPAN2      | uc001eft.3 | Silent            | SNP | 37 |
| 5 | SPDYE4      | uc010cnz.1 | Missense_Mutation | SNP | 37 |
| 5 | FRG1B       | uc010ztk.1 | Intron            | SNP | 37 |
| 5 | SOX8        | uc002ckn.3 | Silent            | SNP | 37 |
| 5 | SLC35C2     | uc002xro.3 | 5'UTR             | SNP | 37 |
| 5 | TMEM178     | uc002rrt.3 | Missense_Mutation | SNP | 37 |
| 5 | RP1         | uc011ldy.1 | Missense_Mutation | SNP | 37 |
| 5 | FCRL6       | uc001fuc.2 | Splice_Site       | SNP | 37 |
| 5 | UNK         | uc002jpm.3 | Missense_Mutation | SNP | 37 |
| 5 | CASC1       | uc001rgk.3 | Missense_Mutation | SNP | 37 |
| 5 | MUC16       | uc002mkp.3 | Silent            | SNP | 37 |
| 5 | PKM2        | uc010uki.2 | Missense_Mutation | SNP | 37 |
| 5 | SLC17A2     | uc011dkb.2 | Missense_Mutation | SNP | 37 |
| 5 | CD6         | uc001nqq.3 | Silent            | SNP | 37 |
| 5 | TM4SF20     | uc002vpb.2 | Missense_Mutation | SNP | 37 |
| 5 | PAK2        | uc003fwy.4 | Missense_Mutation | SNP | 37 |
| 5 | TAS2R20     | uc001qzm.2 | Silent            | SNP | 37 |



|   |           |            |                       |     |    |
|---|-----------|------------|-----------------------|-----|----|
| 5 | NCOA1     | uc002rfk.3 | Missense_Mutation     | SNP | 37 |
| 5 | MMP21     | uc001liu.3 | Silent                | SNP | 37 |
| 5 | TCRA      | uc001wcy.3 | Missense_Mutation     | SNP | 37 |
| 5 | RGMA      | uc010urc.2 | 3'UTR                 | SNP | 37 |
| 5 | NPAS4     | uc001ohx.1 | Missense_Mutation     | SNP | 37 |
| 5 | HAO1      | uc002wmw.1 | Missense_Mutation     | SNP | 37 |
| 5 | ADAMTS20  | uc010skx.2 | Nonsense_Mutation     | SNP | 37 |
| 5 | FAM186A   | uc001rwl.2 | Missense_Mutation     | SNP | 37 |
| 5 | SPEG      | uc010fwg.3 | Silent                | SNP | 37 |
| 5 | KIF15     | uc003cnx.4 | 5'UTR                 | SNP | 37 |
| 5 | GEM       | uc003ygi.3 | 3'UTR                 | SNP | 37 |
| 5 | SYT3      | uc002pst.3 | Missense_Mutation     | SNP | 37 |
| 5 | SGIP1     | uc001dcr.3 | Silent                | SNP | 37 |
| 5 | SLC6A7    | uc003lrr.3 | Missense_Mutation     | SNP | 37 |
| 5 | LOC729862 | uc003jgz.1 | Non-coding_Transcript | SNP | 37 |
| 5 | CWH43     | uc003gyv.3 | Missense_Mutation     | SNP | 37 |
| 5 | UGT3A2    | uc003jjz.2 | 3'UTR                 | SNP | 37 |
| 5 | C1orf88   | uc001eaw.2 | Silent                | SNP | 37 |
| 5 | ACSM2B    | uc002dhj.4 | Missense_Mutation     | SNP | 37 |
| 5 | OR2W3     | uc001idp.1 | Missense_Mutation     | SNP | 37 |
| 5 | OR10G8    | uc001pzp.1 | Missense_Mutation     | SNP | 37 |
| 5 | POP4      | uc002nsf.2 | 5'UTR                 | SNP | 37 |
| 5 | UGT2B15   | uc021xow.1 | Missense_Mutation     | SNP | 37 |
| 5 | PCDHB3    | uc003lio.3 | Missense_Mutation     | SNP | 37 |
| 5 | SPOCD1    | uc001bts.1 | Missense_Mutation     | SNP | 37 |
| 5 | GRK1      | uc010tkf.2 | 3'UTR                 | SNP | 37 |
| 5 | CCDC67    | uc001pdq.3 | Missense_Mutation     | SNP | 37 |
| 5 | HPN       | uc002nxq.2 | 5'UTR                 | SNP | 37 |
| 5 | PIEZO1    | uc010vpb.2 | Silent                | SNP | 37 |
| 5 | BAD       | uc001nzd.3 | 3'UTR                 | SNP | 37 |
| 5 | GAS2L1    | uc003afa.1 | Missense_Mutation     | SNP | 37 |
| 5 | CLSTN3    | uc001qss.3 | Missense_Mutation     | SNP | 37 |
| 5 | DUSP22    | uc011dhn.1 | Silent                | SNP | 37 |
| 5 | KRT18P55  | uc002has.3 | Missense_Mutation     | SNP | 37 |
| 5 | GRTP1     | uc010tkc.2 | Nonsense_Mutation     | SNP | 37 |
| 5 | COL22A1   | uc003yvd.3 | Missense_Mutation     | SNP | 37 |
| 5 | KDM5B     | uc009xag.3 | Missense_Mutation     | SNP | 37 |
| 5 | AFP       | uc003hgz.1 | 3'UTR                 | SNP | 37 |
| 5 | C7orf25   | uc003thx.4 | 3'UTR                 | SNP | 37 |
| 5 | FKBP6     | uc003twz.2 | Missense_Mutation     | SNP | 37 |
| 5 | RPRD1A    | uc002kzg.3 | Splice_Site           | SNP | 37 |
| 5 | MUC16     | uc002mkp.3 | Missense_Mutation     | SNP | 37 |
| 5 | DTNB      | uc002rgh.3 | Missense_Mutation     | SNP | 37 |

|   |          |            |                       |     |    |
|---|----------|------------|-----------------------|-----|----|
| 5 | TTN      | uc021vsy.1 | Missense_Mutation     | SNP | 37 |
| 5 | OR8B4    | uc010sak.2 | Silent                | SNP | 37 |
| 5 | ARFIP2   | uc010ran.2 | 5'UTR                 | SNP | 37 |
| 5 | F13A1    | uc003mwv.3 | Missense_Mutation     | SNP | 37 |
| 5 | LILRB1   | uc010erp.1 | 3'UTR                 | SNP | 37 |
| 5 | ANGEL1   | uc001xsv.3 | Missense_Mutation     | SNP | 37 |
| 5 | SAGE1    | uc010nry.1 | 3'UTR                 | SNP | 37 |
| 5 | HERC2P4  | uc002ecx.3 | Non-coding_Transcript | SNP | 37 |
| 5 | WIZ      | uc002nbc.3 | Missense_Mutation     | SNP | 37 |
| 5 | ATP2A1   | uc002dro.1 | Missense_Mutation     | SNP | 37 |
| 5 | TBX20    | uc011kas.2 | Missense_Mutation     | SNP | 37 |
| 5 | SIRPB1   | uc010gai.3 | Missense_Mutation     | SNP | 37 |
| 5 | CD163    | uc001qsz.3 | Silent                | SNP | 37 |
| 5 | NLRP11   | uc010ygf.2 | Missense_Mutation     | SNP | 37 |
| 5 | CTCFL    | uc010gjj.2 | Missense_Mutation     | SNP | 37 |
| 5 | NXF5     | uc011mrk.1 | Missense_Mutation     | SNP | 37 |
| 5 | YWHAZ    | uc011he.1  | Intron                | SNP | 37 |
| 5 | FAT3     | uc001pdj.4 | Missense_Mutation     | SNP | 37 |
| 5 | KCTD16   | uc003lnm.1 | Missense_Mutation     | SNP | 37 |
| 5 | PRSS35   | uc003pjz.3 | Missense_Mutation     | SNP | 37 |
| 5 | SCN8A    | uc001ryw.3 | Silent                | SNP | 37 |
| 5 | VWA5B1   | uc009vps.2 | Nonsense_Mutation     | SNP | 37 |
| 5 | AQPEP    | uc003kro.3 | Missense_Mutation     | SNP | 37 |
| 5 | CDK17    | uc001tep.2 | Silent                | SNP | 37 |
| 5 | AAACL3   | uc009vnn.1 | Missense_Mutation     | SNP | 37 |
| 5 | TMEM135  | uc001pch.3 | 3'UTR                 | SNP | 37 |
| 5 | FAT4     | uc003ifj.4 | Missense_Mutation     | SNP | 37 |
| 5 | ZBTB33   | uc010nqm.1 | Missense_Mutation     | SNP | 37 |
| 5 | MTCH1    | uc003one.4 | Silent                | SNP | 37 |
| 5 | ARHGAP39 | uc003zds.1 | Missense_Mutation     | SNP | 37 |
| 5 | C1orf168 | uc001cym.4 | Missense_Mutation     | SNP | 37 |
| 5 | ZNF804A  | uc002uph.3 | Missense_Mutation     | SNP | 37 |
| 5 | C6       | uc003jmk.2 | Missense_Mutation     | SNP | 37 |
| 5 | ADAD1    | uc003ieo.3 | Missense_Mutation     | SNP | 37 |
| 5 | MCTP1    | uc003kkx.2 | Missense_Mutation     | SNP | 37 |
| 5 | ATP2C2   | uc010chj.3 | Missense_Mutation     | SNP | 37 |
| 5 | ZNF181   | uc002nvu.3 | Silent                | SNP | 37 |
| 5 | ABCA12   | uc002vew.3 | Silent                | SNP | 37 |
| 5 | PRKCG    | uc010yeg.1 | Missense_Mutation     | SNP | 37 |
| 5 | MAGEE1   | uc004ecm.2 | Missense_Mutation     | SNP | 37 |
| 5 | RHOBTB2  | uc003xcp.2 | Missense_Mutation     | SNP | 37 |
| 5 | OGFR     | uc002ydj.3 | Silent                | SNP | 37 |
| 5 | STXBP5L  | uc003eec.4 | Silent                | SNP | 37 |

|   |          |            |                   |     |    |
|---|----------|------------|-------------------|-----|----|
| 5 | UQCC     | uc002xcd.3 | 5'UTR             | SNP | 37 |
| 5 | ODZ2     | uc010jdd.3 | Missense_Mutation | SNP | 37 |
| 5 | EFCAB3   | uc010wpc.2 | Silent            | SNP | 37 |
| 5 | CSMD3    | uc003ynu.3 | Missense_Mutation | SNP | 37 |
| 5 | AVPR2    | uc004fjh.4 | Silent            | SNP | 37 |
| 5 | APOB     | uc002red.3 | Silent            | SNP | 37 |
| 5 | TNKS1BP1 | uc001njr.3 | Silent            | SNP | 37 |
| 5 | GGT6     | uc010vsb.2 | 5'UTR             | SNP | 37 |
| 5 | TOR2A    | uc004brs.4 | 3'UTR             | SNP | 37 |
| 5 | CLRN1    | uc003eyj.3 | 3'UTR             | SNP | 37 |
| 5 | ZNF831   | uc002yan.3 | Missense_Mutation | SNP | 37 |
| 5 | GUCA2B   | uc001chc.1 | 3'UTR             | SNP | 37 |
| 5 | KBTBD12  | uc010hsr.3 | Silent            | SNP | 37 |
| 5 | POLH     | uc003ovq.4 | Missense_Mutation | SNP | 37 |
| 5 | TEX15    | uc003xil.3 | Silent            | SNP | 37 |
| 5 | SLC4A3   | uc002vmo.4 | Silent            | SNP | 37 |
| 5 | FAM200A  | uc003ura.3 | Missense_Mutation | SNP | 37 |
| 5 | MXRA5    | uc004crg.4 | Missense_Mutation | SNP | 37 |
| 5 | KDM3B    | uc003lcy.1 | Nonsense_Mutation | SNP | 37 |
| 5 | OR51M1   | uc010qzc.2 | Missense_Mutation | SNP | 37 |
| 5 | RNF103   | uc002srn.3 | Intron            | SNP | 37 |
| 5 | KRT36    | uc002hwt.3 | Missense_Mutation | SNP | 37 |
| 5 | F7       | uc001vsv.3 | Missense_Mutation | SNP | 37 |
| 5 | SPNS1    | uc002dry.2 | 3'UTR             | SNP | 37 |
| 5 | COL9A2   | uc001cfh.1 | Missense_Mutation | SNP | 37 |
| 5 | SLC28A1  | uc002blf.3 | 3'UTR             | SNP | 37 |
| 5 | PASD1    | uc004fev.4 | Missense_Mutation | SNP | 37 |
| 5 | VARS     | uc003nxe.3 | Silent            | SNP | 37 |
| 5 | UROD     | uc001cna.2 | 5'UTR             | SNP | 37 |
| 5 | DST      | uc003pcy.4 | Missense_Mutation | SNP | 37 |
| 5 | IL25     | uc001wjr.3 | Silent            | SNP | 37 |
| 5 | FAM19A2  | uc001sqw.3 | 3'UTR             | SNP | 37 |
| 5 | CASQ1    | uc010pja.2 | Missense_Mutation | SNP | 37 |
| 5 | TRAF2    | uc010nbu.3 | Missense_Mutation | SNP | 37 |
| 5 | RASGRP3  | uc002rox.3 | Missense_Mutation | SNP | 37 |
| 5 | DCC      | uc002lfe.2 | Splice_Site       | SNP | 37 |
| 5 | TLR5     | uc001hmv.2 | Missense_Mutation | SNP | 37 |
| 5 | OR8H1    | uc010rje.2 | Silent            | SNP | 37 |
| 5 | SAMD15   | uc001xtq.1 | Missense_Mutation | SNP | 37 |
| 5 | SPN      | uc002dtm.3 | Missense_Mutation | SNP | 37 |
| 5 | DPEP3    | uc002evc.4 | Silent            | SNP | 37 |
| 5 | abParts  | uc021wml.1 | Intron            | SNP | 37 |
| 5 | CFI      | uc011cft.2 | 3'UTR             | SNP | 37 |

|   |             |            |                   |     |    |
|---|-------------|------------|-------------------|-----|----|
| 5 | HCK         | uc002wxh.3 | Missense_Mutation | SNP | 37 |
| 5 | DNAH5       | uc003jfd.2 | Silent            | SNP | 37 |
| 5 | HAPLN3      | uc002bnd.3 | Intron            | SNP | 37 |
| 5 | TMEM92      | uc002iqn.2 | Missense_Mutation | SNP | 37 |
| 5 | OVGP1       | uc001eba.3 | Missense_Mutation | SNP | 37 |
| 5 | THOP1       | uc002lwj.3 | Missense_Mutation | SNP | 37 |
| 5 | CD53        | uc001dzw.3 | Nonsense_Mutation | SNP | 37 |
| 5 | OR2C3       | uc009xgy.3 | Missense_Mutation | SNP | 37 |
| 5 | KCNB2       | uc003xzb.3 | Missense_Mutation | SNP | 37 |
| 5 | MTMR8       | uc004dvs.3 | Silent            | SNP | 37 |
| 5 | CA10        | uc002itv.4 | Silent            | SNP | 37 |
| 5 | PDZK1IP1    | uc001cqw.3 | Missense_Mutation | SNP | 37 |
| 5 | TCRBV3S1    | uc011ksk.1 | Missense_Mutation | SNP | 37 |
| 5 | SNORD115-15 | uc001yzz.1 | Intron            | SNP | 37 |
| 5 | FTSJD2      | uc003ons.3 | Missense_Mutation | SNP | 37 |
| 5 | ALS2CL      | uc003cqa.2 | Silent            | SNP | 37 |
| 5 | LRP4        | uc001ndn.4 | Missense_Mutation | SNP | 37 |
| 5 | ZNF551      | uc002qpx.3 | Missense_Mutation | SNP | 37 |
| 5 | RGPD3       | uc010ywi.1 | 3'UTR             | SNP | 37 |
| 5 | PTPRT       | uc010ggj.3 | Silent            | SNP | 37 |
| 5 | HERC2       | uc001zbj.3 | Missense_Mutation | SNP | 37 |
| 5 | OR4K15      | uc010tkx.2 | Missense_Mutation | SNP | 37 |
| 5 | SPRED1      | uc001zka.4 | 5'UTR             | SNP | 37 |
| 5 | NLGN4X      | uc010ndi.3 | Missense_Mutation | SNP | 37 |
| 5 | GLP1R       | uc003ooj.4 | Missense_Mutation | SNP | 37 |
| 5 | GDF5        | uc010gfc.1 | Nonsense_Mutation | SNP | 37 |
| 5 | LSR         | uc002nyl.3 | Silent            | SNP | 37 |
| 5 | ART3        | uc003hjo.3 | Missense_Mutation | SNP | 37 |
| 5 | NFATC1      | uc010xfg.2 | Silent            | SNP | 37 |
| 5 | SOHLH1      | uc010nbe.3 | Missense_Mutation | SNP | 37 |
| 5 | AK127846    | uc002qao.3 | Silent            | SNP | 37 |
| 5 | RHBDL3      | uc010csx.1 | Silent            | SNP | 37 |
| 5 | EBF3        | uc021qav.1 | Missense_Mutation | SNP | 37 |
| 5 | NOS1        | uc001twn.2 | Silent            | SNP | 37 |
| 5 | UNC5C       | uc003hto.3 | 5'UTR             | SNP | 37 |
| 5 | TTLL10      | uc001acy.2 | Silent            | SNP | 37 |
| 5 | MLL2        | uc001rta.4 | Missense_Mutation | SNP | 37 |
| 5 | ZAN         | uc003uwj.3 | Missense_Mutation | SNP | 37 |
| 5 | TTN         | uc021vsy.1 | Missense_Mutation | SNP | 37 |
| 5 | MIEN1       | uc002hsq.3 | 5'UTR             | SNP | 37 |
| 5 | OR1J2       | uc004bmj.2 | Silent            | SNP | 37 |
| 5 | CHP2        | uc002dmb.1 | 3'UTR             | SNP | 37 |
| 5 | PSMA5       | uc001dxn.3 | Silent            | SNP | 37 |

|   |               |            |                       |     |    |
|---|---------------|------------|-----------------------|-----|----|
| 5 | UNK           | uc002jpm.3 | Missense_Mutation     | SNP | 37 |
| 5 | FAM5B         | uc001glf.3 | Missense_Mutation     | SNP | 37 |
| 5 | OR6N2         | uc010pir.2 | Silent                | SNP | 37 |
| 5 | HPS3          | uc003ewu.1 | 3'UTR                 | SNP | 37 |
| 5 | DQ587284      | uc010xoy.2 | 5'Flank               | SNP | 37 |
| 5 | SMARCA4       | uc010dxo.3 | Missense_Mutation     | SNP | 37 |
| 5 | PASD1         | uc004fev.4 | Missense_Mutation     | SNP | 37 |
| 5 | TTF2          | uc001egy.3 | Nonsense_Mutation     | SNP | 37 |
| 5 | KIAA1324L     | uc011kha.2 | Silent                | SNP | 37 |
| 5 | ZFYVE26       | uc001xka.2 | Missense_Mutation     | SNP | 37 |
| 5 | STON1-GTF2A1L | uc002rwp.2 | Missense_Mutation     | SNP | 37 |
| 5 | FER1L6        | uc003yqw.3 | Missense_Mutation     | SNP | 37 |
| 5 | C1orf65       | uc001hoa.2 | Nonsense_Mutation     | SNP | 37 |
| 5 | ZNF141        | uc003gaa.2 | Missense_Mutation     | SNP | 37 |
| 5 | ASB7          | uc002bwk.3 | Silent                | SNP | 37 |
| 5 | GSPT2         | uc004dpl.3 | Missense_Mutation     | SNP | 37 |
| 5 | RYR3          | uc001zhi.3 | Missense_Mutation     | SNP | 37 |
| 5 | PARD3         | uc010qej.2 | Silent                | SNP | 37 |
| 5 | Unknown       |            | IGR                   | SNP | 37 |
| 5 | PDZD2         | uc003jhl.3 | Missense_Mutation     | SNP | 37 |
| 5 | ZMYM1         | uc001bym.3 | Silent                | SNP | 37 |
| 5 | FAM174B       | uc010boe.3 | 3'UTR                 | SNP | 37 |
| 5 | C9            | uc003jlv.4 | Silent                | SNP | 37 |
| 5 | SYBU          | uc003ynj.4 | Missense_Mutation     | SNP | 37 |
| 5 | RHOBTB2       | uc003xcp.2 | Missense_Mutation     | SNP | 37 |
| 5 | RASA4         | uc003vae.3 | Missense_Mutation     | SNP | 37 |
| 5 | IL1B          | uc002tii.1 | Silent                | SNP | 37 |
| 5 | WWC3          | uc004csx.4 | Silent                | SNP | 37 |
| 5 | SLC38A4       | uc001rpi.2 | 3'UTR                 | SNP | 37 |
| 5 | KRT16P3       | uc002gxb.3 | Non-coding_Transcript | SNP | 37 |
| 5 | C8orf34       | uc010lyz.3 | Missense_Mutation     | SNP | 37 |
| 5 | BAD           | uc001nzd.3 | 3'UTR                 | SNP | 37 |
| 5 | CNTNAP4       | uc002fex.1 | Silent                | SNP | 37 |
| 5 | TMEM8A        | uc002cgu.4 | Silent                | SNP | 37 |
| 5 | AMY2B         | uc010ouo.2 | Splice_Site           | SNP | 37 |
| 5 | SPHKAP        | uc002vpq.2 | Missense_Mutation     | SNP | 37 |
| 5 | RRP12         | uc001knf.3 | 5'UTR                 | SNP | 37 |
| 5 | TRAF6         | uc001mwq.2 | Silent                | SNP | 37 |
| 5 | TTN           | uc021vsy.1 | Missense_Mutation     | SNP | 37 |
| 5 | ANK1          | uc003xom.3 | Splice_Site           | SNP | 37 |
| 5 | ADAM32        | uc003xmt.4 | Silent                | SNP | 37 |
| 5 | MARCH1        | uc003iqs.2 | Nonsense_Mutation     | SNP | 37 |
| 5 | SNCB          | uc010jke.1 | Missense_Mutation     | SNP | 37 |

|   |           |            |                   |     |    |
|---|-----------|------------|-------------------|-----|----|
| 5 | OR1K1     | uc011lze.2 | Missense_Mutation | SNP | 37 |
| 5 | NGF       | uc001efu.1 | Silent            | SNP | 37 |
| 5 | PLP1      | uc010now.1 | 5'UTR             | SNP | 37 |
| 5 | NPC1L1    | uc003tlb.3 | Silent            | SNP | 37 |
| 5 | BCAR1     | uc010vnb.2 | Nonsense_Mutation | SNP | 37 |
| 5 | SRL       | uc002cvz.4 | Intron            | SNP | 37 |
| 5 | ARHGEF11  | uc001fqn.3 | Missense_Mutation | SNP | 37 |
| 5 | JAK3      | uc002nhn.4 | Intron            | SNP | 37 |
| 5 | MOV10L1   | uc003bjj.3 | Silent            | SNP | 37 |
| 5 | ARL6IP5   | uc003dnr.3 | Missense_Mutation | SNP | 37 |
| 5 | TMEM132C  | uc021rgn.1 | Missense_Mutation | SNP | 37 |
| 5 | MICALCL   | uc001mkg.1 | Missense_Mutation | SNP | 37 |
| 5 | LILRA1    | uc002qgh.1 | Missense_Mutation | SNP | 37 |
| 5 | PPP2R3A   | uc003eqv.2 | Missense_Mutation | SNP | 37 |
| 5 | SEC16A    | uc004chr.3 | 5'UTR             | SNP | 37 |
| 5 | UNC5D     | uc003xjr.2 | Missense_Mutation | SNP | 37 |
| 5 | PDE4DIP   | uc021ouh.1 | Missense_Mutation | SNP | 37 |
| 5 | TTC16     | uc004brq.1 | Missense_Mutation | SNP | 37 |
| 5 | IGSF5     | uc002yyo.3 | Missense_Mutation | SNP | 37 |
| 5 | CLCN3     | uc003ish.3 | Missense_Mutation | SNP | 37 |
| 5 | P2RX6     | uc010gsu.1 | Silent            | SNP | 37 |
| 5 | NRAS      | uc009wgu.3 | Missense_Mutation | SNP | 37 |
| 5 | ZMIZ2     | uc003tlr.3 | Missense_Mutation | SNP | 37 |
| 5 | TLR10     | uc003gtj.3 | Missense_Mutation | SNP | 37 |
| 5 | CSMD1     | uc022aqr.1 | Silent            | SNP | 37 |
| 5 | KANK4     | uc001dah.4 | Silent            | SNP | 37 |
| 5 | SMR3A     | uc003hfg.1 | Missense_Mutation | SNP | 37 |
| 5 | GRM8      | uc003vlr.2 | Silent            | SNP | 37 |
| 5 | AHSP      | uc002ecj.3 | Missense_Mutation | SNP | 37 |
| 5 | TMEM241   | uc002kuf.3 | Splice_Site       | SNP | 37 |
| 5 | SCG2      | uc002vnm.3 | Silent            | SNP | 37 |
| 5 | CLN5      | uc001vkc.3 | Nonsense_Mutation | SNP | 37 |
| 5 | ODZ3      | uc003ivd.1 | Missense_Mutation | SNP | 37 |
| 5 | SBSN      | uc002oad.2 | Missense_Mutation | SNP | 37 |
| 5 | CYLD      | uc021tib.1 | Missense_Mutation | SNP | 37 |
| 5 | PREB      | uc002rix.1 | Missense_Mutation | SNP | 37 |
| 5 | HIST1H2BC | uc003ngl.3 | 3'UTR             | SNP | 37 |
| 5 | MAPK4     | uc002lev.3 | Missense_Mutation | SNP | 37 |
| 5 | APBB1IP   | uc001iss.3 | Missense_Mutation | SNP | 37 |
| 5 | BAHCC1    | uc002kaf.2 | Missense_Mutation | SNP | 37 |
| 5 | ZFHX4     | uc003yau.2 | Missense_Mutation | SNP | 37 |
| 5 | TRPM6     | uc004ajl.1 | Missense_Mutation | SNP | 37 |
| 5 | TCHHL1    | uc001ezo.1 | Missense_Mutation | SNP | 37 |

|   |          |            |                   |     |    |
|---|----------|------------|-------------------|-----|----|
| 5 | CCDC99   | uc003mae.4 | Missense_Mutation | SNP | 37 |
| 5 | ADCY8    | uc003ytd.4 | Silent            | SNP | 37 |
| 5 | DCAF7    | uc002jbc.3 | Silent            | SNP | 37 |
| 5 | TEX15    | uc003xil.3 | Missense_Mutation | SNP | 37 |
| 5 | PDP1     | uc011lgn.2 | Missense_Mutation | SNP | 37 |
| 5 | ADAMTS20 | uc010skx.2 | Missense_Mutation | SNP | 37 |
| 5 | ITSN1    | uc002ytc.1 | Missense_Mutation | SNP | 37 |
| 5 | TUBA3C   | uc009zzj.3 | Silent            | SNP | 37 |
| 5 | ADCY9    | uc002cvx.3 | Missense_Mutation | SNP | 37 |
| 5 | DHX29    | uc003jpx.3 | Silent            | SNP | 37 |
| 5 | SLC25A14 | uc004evr.1 | Missense_Mutation | SNP | 37 |
| 5 | GRAP2    | uc003ayh.2 | Missense_Mutation | SNP | 37 |
| 5 | OR5K3    | uc011bgw.2 | Silent            | SNP | 37 |
| 5 | ICAM2    | uc010wpx.1 | 3'UTR             | SNP | 37 |
| 5 | AQP9     | uc002aez.2 | Missense_Mutation | SNP | 37 |
| 5 | TMEM164  | uc004eom.3 | Missense_Mutation | SNP | 37 |
| 5 | OR2M5    | uc010pze.2 | Missense_Mutation | SNP | 37 |
| 5 | TRA2A    | uc011jzd.2 | 5'UTR             | SNP | 37 |
| 5 | TRHDE    | uc001sxa.3 | Missense_Mutation | SNP | 37 |
| 5 | HLA-C    | uc003nsy.3 | Intron            | SNP | 37 |
| 5 | WDR52    | uc003ead.2 | Missense_Mutation | SNP | 37 |
| 5 | POLR3E   | uc002dkj.1 | 3'UTR             | SNP | 37 |
| 6 | INTS3    | uc009wom.3 | Frame_Shift_Del   | DEL | 37 |
| 6 | PLD5     | uc001hzn.2 | Frame_Shift_Ins   | INS | 37 |
| 6 | PMS1     | uc002urh.4 | Frame_Shift_Del   | DEL | 37 |
| 6 | TNS1     | uc002vgt.2 | Frame_Shift_Del   | DEL | 37 |
| 6 | SPEG     | uc010fwg.3 | In_Frame_Del      | DEL | 37 |
| 6 | EDN1     | uc003nae.4 | In_Frame_Del      | DEL | 37 |
| 6 | NME8     | uc003tfn.3 | Frame_Shift_Ins   | INS | 37 |
| 6 | TMED4    | uc003tli.3 | Frame_Shift_Del   | DEL | 37 |
| 6 | ETS1     | uc001qej.2 | Frame_Shift_Del   | DEL | 37 |
| 6 | RAB2B    | uc010tlt.2 | Frame_Shift_Del   | DEL | 37 |
| 6 | NF1      | uc002hgg.3 | In_Frame_Del      | DEL | 37 |
| 6 | MYO1D    | uc002hho.1 | Frame_Shift_Del   | DEL | 37 |
| 6 | CADM4    | uc002oxc.1 | Frame_Shift_Del   | DEL | 37 |
| 6 | RALGAPB  | uc002xiw.3 | Frame_Shift_Del   | DEL | 37 |
| 6 | PISD     | uc003alm.4 | Frame_Shift_Del   | DEL | 37 |
| 6 | PARP14   | uc003efq.4 | Silent            | SNP | 37 |
| 6 | MMP7     | uc001phb.3 | Missense_Mutation | SNP | 37 |
| 6 | KRT82    | uc001sai.1 | Silent            | SNP | 37 |
| 6 | BSN      | uc003cxe.4 | Silent            | SNP | 37 |
| 6 | NES      | uc001fpq.3 | Missense_Mutation | SNP | 37 |
| 6 | PROZ     | uc010agr.1 | Silent            | SNP | 37 |

|   |             |            |                       |     |    |
|---|-------------|------------|-----------------------|-----|----|
| 6 | CRISP2      | uc003ozm.2 | Missense_Mutation     | SNP | 37 |
| 6 | TSHZ2       | uc002xwo.3 | Missense_Mutation     | SNP | 37 |
| 6 | ATMIN       | uc002ffz.1 | Missense_Mutation     | SNP | 37 |
| 6 | DNASE1L3    | uc003djo.1 | Missense_Mutation     | SNP | 37 |
| 6 | A2ML1       | uc001quz.4 | Silent                | SNP | 37 |
| 6 | C3orf56     | uc003eji.1 | Silent                | SNP | 37 |
| 6 | FRMPD3      | uc022cce.1 | 5'Flank               | SNP | 37 |
| 6 | LTBP2       | uc001xqa.3 | Missense_Mutation     | SNP | 37 |
| 6 | IFNAR2      | uc002yrl.1 | Missense_Mutation     | SNP | 37 |
| 6 | CDH10       | uc003jgr.2 | Missense_Mutation     | SNP | 37 |
| 6 | BC047626    | uc003qmd.4 | 3'UTR                 | SNP | 37 |
| 6 | COL6A5      | uc010htj.1 | Missense_Mutation     | SNP | 37 |
| 6 | C11orf93    | uc010rwf.1 | 5'Flank               | SNP | 37 |
| 6 | IRX1        | uc003jde.3 | Missense_Mutation     | SNP | 37 |
| 6 | SDK2        | uc010dfm.3 | Silent                | SNP | 37 |
| 6 | SART1       | uc001ogl.3 | Missense_Mutation     | SNP | 37 |
| 6 | ABCF3       | uc003fmz.2 | 3'UTR                 | SNP | 37 |
| 6 | CHTF18      | uc010brf.3 | 5'UTR                 | SNP | 37 |
| 6 | TRPM4       | uc002pmw.3 | Missense_Mutation     | SNP | 37 |
| 6 | CORO7-PAM16 | uc002cwi.1 | 3'UTR                 | SNP | 37 |
| 6 | CCDC76      | uc001dsv.3 | Missense_Mutation     | SNP | 37 |
| 6 | KIAA1244    | uc003qhu.3 | Missense_Mutation     | SNP | 37 |
| 6 | SPN         | uc002dtm.3 | 3'UTR                 | SNP | 37 |
| 6 | KRT34       | uc002hwm.3 | Missense_Mutation     | SNP | 37 |
| 6 | LOC144481   | uc001tcu.3 | Non-coding_Transcript | SNP | 37 |
| 6 | ZBTB8B      | uc001bvl.4 | Missense_Mutation     | SNP | 37 |
| 6 | ARPP21      | uc003tge.1 | Silent                | SNP | 37 |
| 6 | EPHA10      | uc009vvi.3 | Missense_Mutation     | SNP | 37 |
| 6 | HLA-DRB5    | uc003obk.4 | Intron                | SNP | 37 |
| 6 | PTPRB       | uc001swc.4 | Missense_Mutation     | SNP | 37 |
| 6 | HK3         | uc003mfa.3 | Missense_Mutation     | SNP | 37 |
| 6 | ABCF3       | uc003fmz.2 | Missense_Mutation     | SNP | 37 |
| 6 | PGR         | uc001pgh.2 | Missense_Mutation     | SNP | 37 |
| 6 | FREM1       | uc003zlm.3 | Missense_Mutation     | SNP | 37 |
| 6 | LRRC4C      | uc001mxa.1 | Nonsense_Mutation     | SNP | 37 |
| 6 | KIF25       | uc003qwk.1 | Nonsense_Mutation     | SNP | 37 |
| 6 | ADAMTS6     | uc003jtp.3 | Missense_Mutation     | SNP | 37 |
| 6 | SUN3        | uc003tof.3 | Missense_Mutation     | SNP | 37 |
| 6 | MRPL10      | uc002ily.3 | Silent                | SNP | 37 |
| 6 | LRP2        | uc002ues.3 | Missense_Mutation     | SNP | 37 |
| 6 | FAM71F1     | uc003vno.1 | Silent                | SNP | 37 |
| 6 | ZFAT        | uc003yup.3 | Silent                | SNP | 37 |
| 6 | GLTSCR1     | uc002phh.4 | Missense_Mutation     | SNP | 37 |



|   |           |            |                       |     |    |
|---|-----------|------------|-----------------------|-----|----|
| 6 | CR1       | uc001hfx.3 | Missense_Mutation     | SNP | 37 |
| 6 | ARHGEF38  | uc003hvx.2 | Missense_Mutation     | SNP | 37 |
| 6 | MMP16     | uc003yeb.4 | Missense_Mutation     | SNP | 37 |
| 6 | CLEC4C    | uc001qtg.1 | 3'UTR                 | SNP | 37 |
| 6 | PLA1A     | uc003ecu.3 | Splice_Site           | SNP | 37 |
| 6 | LAMA1     | uc002knm.3 | Missense_Mutation     | SNP | 37 |
| 6 | RASGRF1   | uc002beq.3 | Silent                | SNP | 37 |
| 6 | EFHA2     | uc003wxd.2 | Missense_Mutation     | SNP | 37 |
| 6 | GSDMA     | uc002htl.1 | Silent                | SNP | 37 |
| 6 | RPF1      | uc001dju.4 | Silent                | SNP | 37 |
| 6 | ANKRD42   | uc010rsv.1 | Missense_Mutation     | SNP | 37 |
| 6 | OR6T1     | uc010sab.2 | Silent                | SNP | 37 |
| 6 | HAPLN3    | uc002bnd.3 | Silent                | SNP | 37 |
| 6 | SYNE2     | uc001xgl.3 | Missense_Mutation     | SNP | 37 |
| 6 | PRDX2     | uc002mvd.3 | Missense_Mutation     | SNP | 37 |
| 6 | RHBDL3    | uc010csx.1 | Missense_Mutation     | SNP | 37 |
| 6 | GIGYF1    | uc003uwg.1 | Nonsense_Mutation     | SNP | 37 |
| 6 | APBB1IP   | uc001iss.3 | Missense_Mutation     | SNP | 37 |
| 6 | CTC1      | uc002gkq.4 | Missense_Mutation     | SNP | 37 |
| 6 | ASNA1     | uc002muv.3 | Missense_Mutation     | SNP | 37 |
| 6 | TTN       | uc021vsy.1 | Missense_Mutation     | SNP | 37 |
| 6 | LARGE     | uc003and.4 | Silent                | SNP | 37 |
| 6 | PLEKHM2   | uc010obo.2 | Missense_Mutation     | SNP | 37 |
| 6 | PRR15L    | uc002imp.3 | Missense_Mutation     | SNP | 37 |
| 6 | BTBD11    | uc001tmk.1 | Missense_Mutation     | SNP | 37 |
| 6 | SLC5A8    | uc001thz.4 | Missense_Mutation     | SNP | 37 |
| 6 | BC080605  | uc004aex.3 | Non-coding_Transcript | SNP | 37 |
| 6 | MT3       | uc002ejg.3 | 3'UTR                 | SNP | 37 |
| 6 | KIAA1549  | uc011kql.2 | Missense_Mutation     | SNP | 37 |
| 6 | SLC17A1   | uc003nfh.4 | Missense_Mutation     | SNP | 37 |
| 6 | C17orf102 | uc002hie.1 | Silent                | SNP | 37 |
| 6 | RIMS2     | uc003ylr.3 | Missense_Mutation     | SNP | 37 |
| 6 | PRSS42    | uc003cqi.3 | 5'UTR                 | SNP | 37 |
| 6 | HOXA10    | uc011jzm.2 | Missense_Mutation     | SNP | 37 |
| 6 | SLCO6A1   | uc003knn.3 | Missense_Mutation     | SNP | 37 |
| 6 | BPIFB2    | uc002wyj.3 | Missense_Mutation     | SNP | 37 |
| 6 | AGTR2     | uc004eqh.4 | Missense_Mutation     | SNP | 37 |
| 6 | CXCR2     | uc002vgz.2 | Silent                | SNP | 37 |
| 6 | ZNF80     | uc010hqq.3 | Missense_Mutation     | SNP | 37 |
| 6 | TRIB3     | uc002wdn.3 | Silent                | SNP | 37 |
| 6 | TTN       | uc021vsy.1 | Silent                | SNP | 37 |
| 6 | PAPOLG    | uc002sai.3 | Missense_Mutation     | SNP | 37 |
| 6 | EPO       | uc003uwi.3 | Missense_Mutation     | SNP | 37 |

|   |            |            |                   |     |    |
|---|------------|------------|-------------------|-----|----|
| 6 | TECPR1     | uc003upg.3 | Missense_Mutation | SNP | 37 |
| 6 | MFI2       | uc003fxk.4 | Missense_Mutation | SNP | 37 |
| 6 | SBNO2      | uc002lrk.4 | Missense_Mutation | SNP | 37 |
| 6 | UNC80      | uc010zjc.1 | Silent            | SNP | 37 |
| 6 | OVGP1      | uc001eba.3 | Missense_Mutation | SNP | 37 |
| 6 | FBLL1      | uc011dep.2 | Silent            | SNP | 37 |
| 6 | AX747124   | uc003wpz.1 | Silent            | SNP | 37 |
| 6 | RAD21      | uc003yod.3 | Missense_Mutation | SNP | 37 |
| 6 | OBSCN      | uc001hsn.3 | Missense_Mutation | SNP | 37 |
| 6 | PIK3C2G    | uc010sib.2 | Silent            | SNP | 37 |
| 6 | LRRIQ4     | uc003fjb.3 | Missense_Mutation | SNP | 37 |
| 6 | DOPEY2     | uc002yvg.3 | Silent            | SNP | 37 |
| 6 | TPRX1      | uc002php.2 | Missense_Mutation | SNP | 37 |
| 6 | MDM1       | uc001stz.2 | Missense_Mutation | SNP | 37 |
| 6 | DHODH      | uc002fbp.3 | 5'UTR             | SNP | 37 |
| 6 | DDX46      | uc003kzw.3 | Splice_Site       | SNP | 37 |
| 6 | UNC79      | uc001ybv.1 | Missense_Mutation | SNP | 37 |
| 6 | TRRAP      | uc003upp.3 | Silent            | SNP | 37 |
| 6 | GLDC       | uc003zkc.3 | Missense_Mutation | SNP | 37 |
| 6 | HYDIN      | uc002ezr.3 | Silent            | SNP | 37 |
| 6 | PBX1       | uc001gct.3 | 3'UTR             | SNP | 37 |
| 6 | HNRNPM     | uc010dwe.3 | Missense_Mutation | SNP | 37 |
| 6 | TFRC       | uc003fvz.4 | Silent            | SNP | 37 |
| 6 | IFT81      | uc001tqi.3 | Silent            | SNP | 37 |
| 6 | MYH7       | uc001wjx.3 | Silent            | SNP | 37 |
| 6 | MMP3       | uc001phj.1 | Missense_Mutation | SNP | 37 |
| 6 | C19orf12   | uc002nsl.3 | Silent            | SNP | 37 |
| 6 | RIBC2      | uc011aqs.2 | Nonsense_Mutation | SNP | 37 |
| 6 | KRTAP5-4   | uc009ycy.1 | Missense_Mutation | SNP | 37 |
| 6 | BPIFC      | uc003amn.2 | Missense_Mutation | SNP | 37 |
| 6 | C16orf78   | uc002efr.3 | Missense_Mutation | SNP | 37 |
| 6 | ST6GALNAC2 | uc002jsg.4 | Splice_Site       | SNP | 37 |
| 6 | ST18       | uc003xqz.2 | Missense_Mutation | SNP | 37 |
| 6 | ABCB11     | uc002ueo.1 | Missense_Mutation | SNP | 37 |
| 6 | KPRP       | uc001fal.1 | Missense_Mutation | SNP | 37 |
| 6 | COG2       | uc001htw.3 | Missense_Mutation | SNP | 37 |
| 6 | ANGPT1     | uc003ymn.3 | 5'UTR             | SNP | 37 |
| 6 | C17orf57   | uc002iln.3 | Missense_Mutation | SNP | 37 |
| 6 | CLRN1      | uc021xf.1  | 5'UTR             | SNP | 37 |
| 6 | HOXA-AS3   | uc003syr.2 | 5'UTR             | SNP | 37 |
| 6 | IMPACT     | uc002kvh.4 | Missense_Mutation | SNP | 37 |
| 6 | MAK        | uc021ylk.1 | 5'UTR             | SNP | 37 |
| 6 | PROCA1     | uc002hcb.3 | 5'UTR             | SNP | 37 |

|   |              |            |                       |     |    |
|---|--------------|------------|-----------------------|-----|----|
| 6 | COL4A6       | uc004enw.4 | Missense_Mutation     | SNP | 37 |
| 6 | MPI          | uc010ulv.2 | 3'UTR                 | SNP | 37 |
| 6 | MTUS2        | uc001usl.4 | Silent                | SNP | 37 |
| 6 | FBXO43       | uc003yjd.3 | Silent                | SNP | 37 |
| 6 | PNPO         | uc002imo.3 | 3'UTR                 | SNP | 37 |
| 6 | PDZD2        | uc003jhl.3 | Silent                | SNP | 37 |
| 6 | LIF          | uc003agz.2 | 3'UTR                 | SNP | 37 |
| 6 | VPS33B       | uc002bqp.1 | Missense_Mutation     | SNP | 37 |
| 6 | TTC28        | uc003adp.4 | Splice_Site           | SNP | 37 |
| 6 | GBP6         | uc001dnf.2 | Silent                | SNP | 37 |
| 6 | ACTRT2       | uc001ajz.3 | Silent                | SNP | 37 |
| 6 | AK127846     | uc002qao.3 | Missense_Mutation     | SNP | 37 |
| 6 | REG4         | uc001eig.3 | 5'UTR                 | SNP | 37 |
| 6 | MFSD12       | uc002lxw.3 | Missense_Mutation     | SNP | 37 |
| 6 | C6orf89      | uc003omw.3 | Missense_Mutation     | SNP | 37 |
| 6 | VRK1         | uc001yft.3 | Missense_Mutation     | SNP | 37 |
| 6 | SLC35B4      | uc003vro.4 | Silent                | SNP | 37 |
| 6 | U2AF1        | uc002zda.1 | Missense_Mutation     | SNP | 37 |
| 6 | EPS8L2       | uc010qwk.2 | Missense_Mutation     | SNP | 37 |
| 6 | CATSPERB     | uc001xzs.1 | Missense_Mutation     | SNP | 37 |
| 6 | DBI          | uc002tlw.3 | 5'UTR                 | SNP | 37 |
| 6 | LILRB4       | uc010ert.3 | 3'UTR                 | SNP | 37 |
| 6 | MRPL39       | uc002yln.3 | Nonsense_Mutation     | SNP | 37 |
| 6 | KRIT1        | uc003ulq.1 | Missense_Mutation     | SNP | 37 |
| 6 | F13A1        | uc003mwv.3 | Missense_Mutation     | SNP | 37 |
| 6 | FAM75C1      | uc010mqi.3 | Silent                | SNP | 37 |
| 6 | PARD3B       | uc002var.2 | Silent                | SNP | 37 |
| 6 | LOC100124692 | uc003vxa.2 | Non-coding_Transcript | SNP | 37 |
| 6 | TRAM1        | uc003xyo.2 | 3'UTR                 | SNP | 37 |
| 6 | CEACAM5      | uc002orl.3 | Missense_Mutation     | SNP | 37 |
| 6 | C22orf34     | uc003bit.3 | Silent                | SNP | 37 |
| 6 | OLR1         | uc001qxo.1 | Missense_Mutation     | SNP | 37 |
| 6 | DNAH5        | uc003jfd.2 | Silent                | SNP | 37 |
| 6 | MFNG         | uc003ass.2 | 3'UTR                 | SNP | 37 |
| 6 | ARHGEF17     | uc001otu.3 | Missense_Mutation     | SNP | 37 |
| 6 | ALMS1        | uc002sje.1 | Missense_Mutation     | SNP | 37 |
| 6 | WDR87        | uc002ohj.2 | Silent                | SNP | 37 |
| 6 | CCDC80       | uc003dzf.3 | Missense_Mutation     | SNP | 37 |
| 6 | SERPINA3     | uc001ydo.4 | Missense_Mutation     | SNP | 37 |
| 6 | AK128833     | uc001acx.1 | Missense_Mutation     | SNP | 37 |
| 6 | GAL3ST1      | uc003aig.1 | Silent                | SNP | 37 |
| 6 | PARP8        | uc003jon.4 | Missense_Mutation     | SNP | 37 |
| 6 | KIFC2        | uc003zcz.3 | 3'UTR                 | SNP | 37 |

|   |          |            |                       |     |    |
|---|----------|------------|-----------------------|-----|----|
| 6 | PCDHGC5  | uc003lji.2 | Missense_Mutation     | SNP | 37 |
| 6 | NBEAL2   | uc003cqp.3 | Silent                | SNP | 37 |
| 6 | GOLGA6C  | uc002azs.2 | Missense_Mutation     | SNP | 37 |
| 6 | OR4C15   | uc010rig.2 | Silent                | SNP | 37 |
| 6 | STAB2    | uc001tjw.3 | Missense_Mutation     | SNP | 37 |
| 6 | PGBD5    | uc010pwb.2 | Missense_Mutation     | SNP | 37 |
| 6 | ZNF470   | uc002qnl.4 | Intron                | SNP | 37 |
| 6 | GABRR1   | uc003pna.2 | Missense_Mutation     | SNP | 37 |
| 6 | WNK2     | uc004ati.1 | Silent                | SNP | 37 |
| 6 | UBOX5    | uc002whw.3 | Silent                | SNP | 37 |
| 6 | MYO3B    | uc002ufy.3 | 3'UTR                 | SNP | 37 |
| 6 | CDH9     | uc003jgs.1 | Missense_Mutation     | SNP | 37 |
| 6 | OR6C2    | uc001sgz.1 | Missense_Mutation     | SNP | 37 |
| 6 | PPP1R16B | uc002xe.3  | Missense_Mutation     | SNP | 37 |
| 6 | OR52A1   | uc010qyy.2 | Silent                | SNP | 37 |
| 6 | LRRC33   | uc003fwv.3 | Silent                | SNP | 37 |
| 6 | IRF8     | uc002fjh.3 | Silent                | SNP | 37 |
| 6 | AZGP1P1  | uc003usi.2 | 3'UTR                 | SNP | 37 |
| 6 | MEI1     | uc003baz.1 | Missense_Mutation     | SNP | 37 |
| 6 | TAS1R1   | uc001ant.3 | Missense_Mutation     | SNP | 37 |
| 6 | SPHKAP   | uc002vpq.2 | Missense_Mutation     | SNP | 37 |
| 6 | abParts  | uc021ser.1 | Non-coding_Transcript | SNP | 37 |
| 6 | C1D      | uc010fdc.3 | 3'UTR                 | SNP | 37 |
| 6 | C1orf150 | uc001idf.3 | Splice_Site           | SNP | 37 |
| 6 | GRIN2A   | uc002czo.4 | Missense_Mutation     | SNP | 37 |
| 6 | PLEKHA7  | uc010rcu.1 | Missense_Mutation     | SNP | 37 |
| 6 | TOB2P1   | uc011dla.1 | Non-coding_Transcript | SNP | 37 |
| 6 | CCDC90B  | uc001pae.3 | 5'UTR                 | SNP | 37 |
| 6 | SYTL1    | uc001bnx.2 | 3'UTR                 | SNP | 37 |
| 6 | BC128131 | uc002nqz.1 | Missense_Mutation     | SNP | 37 |
| 6 | CD300LG  | uc002iem.3 | Splice_Site           | SNP | 37 |
| 6 | WDR4     | uc002zck.1 | 3'UTR                 | SNP | 37 |
| 6 | FAM59B   | uc002rgw.2 | Silent                | SNP | 37 |
| 6 | HGD      | uc003edw.3 | Missense_Mutation     | SNP | 37 |
| 6 | TBC1D16  | uc002jxj.3 | Missense_Mutation     | SNP | 37 |
| 6 | KRT36    | uc002hwt.3 | Silent                | SNP | 37 |
| 6 | CRISPLD2 | uc010voh.1 | Silent                | SNP | 37 |
| 6 | MYH13    | uc002gmk.1 | Missense_Mutation     | SNP | 37 |
| 6 | ZNF23    | uc002fai.3 | Missense_Mutation     | SNP | 37 |
| 6 | CMIP     | uc002fgp.3 | Silent                | SNP | 37 |
| 6 | CATSPERB | uc001xzs.1 | Missense_Mutation     | SNP | 37 |
| 6 | ASB2     | uc001ycd.3 | Silent                | SNP | 37 |
| 6 | FLT3LG   | uc010yav.2 | 3'UTR                 | SNP | 37 |

|   |                    |            |                   |     |    |
|---|--------------------|------------|-------------------|-----|----|
| 6 | RAI1               | uc002grm.3 | 3'UTR             | SNP | 37 |
| 6 | FBXL15             | uc001kvl.1 | 5'UTR             | SNP | 37 |
| 6 | CEP112             | uc002jfk.3 | Silent            | SNP | 37 |
| 6 | NXPH3              | uc002ipa.3 | 3'UTR             | SNP | 37 |
| 6 | _alpha_immunoglobu | uc001wdk.2 | Missense_Mutation | SNP | 37 |
| 6 | OR3A2              | uc002fvg.3 | 3'UTR             | SNP | 37 |
| 6 | TTN                | uc021vsy.1 | Missense_Mutation | SNP | 37 |
| 6 | PLIN1              | uc010upx.1 | Missense_Mutation | SNP | 37 |
| 6 | GPSM3              | uc003oay.4 | 5'UTR             | SNP | 37 |
| 6 | COPA               | uc001fvv.4 | 5'UTR             | SNP | 37 |
| 6 | MARS               | uc001sog.3 | 5'UTR             | SNP | 37 |
| 6 | NOTCH4             | uc003obb.3 | 5'UTR             | SNP | 37 |
| 6 | BC016970           | uc002aqe.3 | 3'UTR             | SNP | 37 |
| 6 | PCDHGC5            | uc003ljo.2 | Missense_Mutation | SNP | 37 |
| 6 | WDR87              | uc002ohj.2 | Missense_Mutation | SNP | 37 |
| 6 | USH2A              | uc001hku.1 | Silent            | SNP | 37 |
| 6 | ULK4               | uc003ckv.4 | Silent            | SNP | 37 |
| 6 | CATSPERD           | uc002mda.3 | Nonsense_Mutation | SNP | 37 |
| 6 | PHRF1              | uc001lqe.3 | 5'Flank           | SNP | 37 |
| 6 | BRE                | uc002rls.3 | Intron            | SNP | 37 |
| 6 | CLTCL1             | uc021wle.1 | Missense_Mutation | SNP | 37 |
| 6 | JPH4               | uc001wkq.2 | Missense_Mutation | SNP | 37 |
| 6 | HLA-G              | uc011dmb.2 | Intron            | SNP | 37 |
| 6 | KALRN              | uc003ehg.3 | Missense_Mutation | SNP | 37 |
| 6 | TCRA               | uc001wbw.2 | Intron            | SNP | 37 |
| 6 | SPATA7             | uc001xws.3 | 5'UTR             | SNP | 37 |
| 6 | DNAH12             | uc003dit.2 | Missense_Mutation | SNP | 37 |
| 6 | PIGQ               | uc002chm.3 | 3'UTR             | SNP | 37 |
| 6 | GPR87              | uc003eyt.2 | Silent            | SNP | 37 |
| 6 | ARMC10             | uc003vaw.2 | Nonsense_Mutation | SNP | 37 |
| 6 | SLCO1B3            | uc010sin.2 | Missense_Mutation | SNP | 37 |
| 6 | SIK3               | uc001ppy.3 | Missense_Mutation | SNP | 37 |
| 6 | ZNF780A            | uc010xvh.2 | Missense_Mutation | SNP | 37 |
| 6 | PNPLA2             | uc001lrt.3 | Silent            | SNP | 37 |
| 6 | B3GALT5            | uc002yyb.1 | Intron            | SNP | 37 |
| 6 | STXBP5L            | uc003eec.4 | Missense_Mutation | SNP | 37 |
| 6 | TTL12              | uc003bdq.3 | Missense_Mutation | SNP | 37 |
| 6 | ZNF44              | uc002mtl.3 | Intron            | SNP | 37 |
| 6 | TAOK2              | uc002dvc.2 | Silent            | SNP | 37 |
| 6 | LPIN3              | uc010ggh.3 | Silent            | SNP | 37 |
| 6 | ST18               | uc003xqz.2 | Missense_Mutation | SNP | 37 |
| 6 | AKAP13             | uc002blu.1 | Splice_Site       | SNP | 37 |
| 6 | CATSPERD           | uc002mda.3 | Missense_Mutation | SNP | 37 |

|   |          |            |                       |     |    |
|---|----------|------------|-----------------------|-----|----|
| 6 | GPBP1    | uc003jrk.4 | Missense_Mutation     | SNP | 37 |
| 6 | OR7E5P   | uc010riu.1 | 3'UTR                 | SNP | 37 |
| 6 | CR936796 | uc001eiw.1 | Intron                | SNP | 37 |
| 6 | SEC16A   | uc004chr.3 | Missense_Mutation     | SNP | 37 |
| 6 | ABCB5    | uc010kuh.3 | Missense_Mutation     | SNP | 37 |
| 6 | TMEM132D | uc009zyl.1 | Missense_Mutation     | SNP | 37 |
| 6 | IFI35    | uc021txx.1 | Missense_Mutation     | SNP | 37 |
| 6 | KDM5B    | uc009xag.3 | Missense_Mutation     | SNP | 37 |
| 6 | SETMAR   | uc011asp.2 | Silent                | SNP | 37 |
| 6 | SLC8A1   | uc002rrx.3 | Missense_Mutation     | SNP | 37 |
| 6 | CAB39L   | uc001vcw.3 | Missense_Mutation     | SNP | 37 |
| 6 | NACAD    | uc003tmt.3 | Silent                | SNP | 37 |
| 6 | CBY1     | uc003awb.3 | Missense_Mutation     | SNP | 37 |
| 6 | CHST8    | uc002nus.4 | Missense_Mutation     | SNP | 37 |
| 6 | ABCA4    | uc001dqh.3 | Missense_Mutation     | SNP | 37 |
| 6 | LRRIQ1   | uc001tac.3 | Missense_Mutation     | SNP | 37 |
| 6 | C7orf58  | uc003vjq.4 | Missense_Mutation     | SNP | 37 |
| 6 | ZNF37BP  | uc001jab.4 | Non-coding_Transcript | SNP | 37 |
| 6 | PTPRG    | uc003dlb.3 | 5'UTR                 | SNP | 37 |
| 6 | ZHX2     | uc003ypk.1 | Silent                | SNP | 37 |
| 6 | CYP2C9   | uc001kjj.3 | 3'UTR                 | SNP | 37 |
| 6 | NLRP10   | uc001mfv.1 | Missense_Mutation     | SNP | 37 |
| 6 | PDE4DIP  | uc021ouh.1 | Missense_Mutation     | SNP | 37 |
| 6 | CYP27C1  | uc002tod.2 | 3'UTR                 | SNP | 37 |
| 6 | CACNG2   | uc003aps.2 | Missense_Mutation     | SNP | 37 |
| 6 | DFNB31   | uc004biz.4 | Silent                | SNP | 37 |
| 6 | RGPD4    | uc010ywk.2 | Silent                | SNP | 37 |
| 6 | EPB41L4A | uc003kpv.1 | Missense_Mutation     | SNP | 37 |
| 6 | DAAM1    | uc001xdz.1 | Silent                | SNP | 37 |
| 6 | MYT1     | uc002yii.3 | Missense_Mutation     | SNP | 37 |
| 6 | MYH13    | uc002gmk.1 | Silent                | SNP | 37 |
| 6 | HCRTR2   | uc003pcl.3 | Intron                | SNP | 37 |
| 6 | CCDC88C  | uc010aty.3 | Missense_Mutation     | SNP | 37 |
| 6 | PILRB    | uc022ail.1 | 5'Flank               | SNP | 37 |
| 6 | LPHN2    | uc001dit.4 | Silent                | SNP | 37 |
| 6 | ZC3H3    | uc003yyd.2 | 3'UTR                 | SNP | 37 |
| 6 | SLC6A19  | uc003jbw.4 | Missense_Mutation     | SNP | 37 |
| 6 | KAT6A    | uc010lxb.3 | Silent                | SNP | 37 |
| 6 | VWA3B    | uc002syo.3 | Missense_Mutation     | SNP | 37 |
| 6 | SCN7A    | uc002udu.2 | Missense_Mutation     | SNP | 37 |
| 6 | C4orf21  | uc003iau.3 | Silent                | SNP | 37 |
| 6 | SRSF5    | uc001xln.1 | 3'UTR                 | SNP | 37 |
| 6 | PLB1     | uc002rmb.2 | Missense_Mutation     | SNP | 37 |

|   |              |            |                   |     |    |
|---|--------------|------------|-------------------|-----|----|
| 6 | NECAB2       | uc002fhd.3 | Missense_Mutation | SNP | 37 |
| 6 | BIRC8        | uc002qbk.3 | Missense_Mutation | SNP | 37 |
| 6 | MGAT4B       | uc003mkr.3 | Intron            | SNP | 37 |
| 6 | GIMAP7       | uc003whk.3 | Silent            | SNP | 37 |
| 6 | SLC8A1       | uc002rrx.3 | Silent            | SNP | 37 |
| 6 | HCN3         | uc001fjz.1 | Silent            | SNP | 37 |
| 6 | PTPN21       | uc001xwv.4 | Missense_Mutation | SNP | 37 |
| 6 | KCNT1        | uc011mdq.2 | Silent            | SNP | 37 |
| 6 | CPSF2        | uc001yah.2 | Silent            | SNP | 37 |
| 6 | OR5AP2       | uc001njb.1 | Missense_Mutation | SNP | 37 |
| 6 | SLC35G5      | uc003wtp.1 | Missense_Mutation | SNP | 37 |
| 6 | EWSR1        | uc003aev.3 | Missense_Mutation | SNP | 37 |
| 6 | TNFRSF8      | uc001atq.3 | Missense_Mutation | SNP | 37 |
| 6 | LOC100233156 | uc011mfn.2 | Intron            | SNP | 37 |
| 6 | OPN5         | uc003ozc.3 | Missense_Mutation | SNP | 37 |
| 6 | KCNH3        | uc001ruh.1 | Missense_Mutation | SNP | 37 |
| 6 | TLL2         | uc001kml.2 | Missense_Mutation | SNP | 37 |
| 6 | OR52A1       | uc010qyy.2 | Silent            | SNP | 37 |
| 6 | COL4A3       | uc002vom.2 | Missense_Mutation | SNP | 37 |
| 6 | UFSP1        | uc003uxc.4 | Missense_Mutation | SNP | 37 |
| 6 | ZBTB45       | uc002qtd.3 | Silent            | SNP | 37 |
| 6 | SLC27A5      | uc002qtc.2 | Missense_Mutation | SNP | 37 |
| 6 | ZFPM2        | uc003ymd.3 | Missense_Mutation | SNP | 37 |
| 6 | PCSK5        | uc004akc.2 | Missense_Mutation | SNP | 37 |
| 6 | ASXL3        | uc010dmg.1 | Silent            | SNP | 37 |
| 6 | ELTD1        | uc001diq.4 | Missense_Mutation | SNP | 37 |
| 6 | PHF21A       | uc001nca.1 | 3'UTR             | SNP | 37 |
| 6 | BSN          | uc003cxe.4 | Missense_Mutation | SNP | 37 |
| 6 | PRKX         | uc010nde.3 | 3'UTR             | SNP | 37 |
| 6 | CRHBP        | uc003ker.3 | Missense_Mutation | SNP | 37 |
| 6 | OR2A14       | uc011kua.2 | Missense_Mutation | SNP | 37 |
| 6 | CGN          | uc009wmw.3 | Silent            | SNP | 37 |
| 6 | PAK7         | uc002wnl.2 | Silent            | SNP | 37 |
| 6 | ERCC6        | uc001jhs.4 | Missense_Mutation | SNP | 37 |
| 6 | LRRD1        | uc011khp.1 | Missense_Mutation | SNP | 37 |
| 6 | CDC42BPA     | uc001hqr.3 | Missense_Mutation | SNP | 37 |
| 6 | RCAN2        | uc002uhz.3 | Missense_Mutation | SNP | 37 |
| 6 | ATP5J2-PTCD1 | uc011kiw.2 | Missense_Mutation | SNP | 37 |
| 6 | CR2          | uc001hfv.3 | Missense_Mutation | SNP | 37 |
| 6 | SLC9C1       | uc003dyu.3 | Missense_Mutation | SNP | 37 |
| 6 | KCNV1        | uc003ynr.4 | Silent            | SNP | 37 |
| 6 | ROBO3        | uc010saq.2 | Silent            | SNP | 37 |
| 6 | H1FNT        | uc001rrm.3 | Silent            | SNP | 37 |

|   |          |            |                       |     |    |
|---|----------|------------|-----------------------|-----|----|
| 6 | BMP2     | uc002wmu.1 | Silent                | SNP | 37 |
| 6 | SLC16A11 | uc002gei.1 | Silent                | SNP | 37 |
| 6 | MBOAT4   | uc010lvq.3 | 3'UTR                 | SNP | 37 |
| 6 | TRIM29   | uc001pwz.3 | Silent                | SNP | 37 |
| 6 | POTEE    | uc002tsn.2 | Missense_Mutation     | SNP | 37 |
| 6 | UNC13C   | uc021sms.1 | Missense_Mutation     | SNP | 37 |
| 6 | SOLH     | uc002chi.3 | Nonsense_Mutation     | SNP | 37 |
| 6 | NCKAP5   | uc002ttp.3 | Missense_Mutation     | SNP | 37 |
| 6 | GPR124   | uc003xkj.3 | Splice_Site           | SNP | 37 |
| 6 | TMEM11   | uc002gyq.2 | Missense_Mutation     | SNP | 37 |
| 6 | CSMD1    | uc022aqr.1 | Silent                | SNP | 37 |
| 6 | KIAA0368 | uc004bfe.1 | Missense_Mutation     | SNP | 37 |
| 6 | HSF2     | uc003pyu.2 | Silent                | SNP | 37 |
| 6 | AK127974 | uc002gxc.1 | Non-coding_Transcript | SNP | 37 |
| 6 | USP10    | uc010voe.2 | Missense_Mutation     | SNP | 37 |
| 6 | GNA11    | uc002lxd.3 | Missense_Mutation     | SNP | 37 |
| 6 | RFFL     | uc010wcd.1 | 3'UTR                 | SNP | 37 |
| 6 | RPS23    | uc003khu.3 | 3'UTR                 | SNP | 37 |
| 6 | OVGP1    | uc001eba.3 | Silent                | SNP | 37 |
| 6 | HIVEP2   | uc003qjd.3 | Missense_Mutation     | SNP | 37 |
| 6 | POLR3GL  | uc001enp.1 | Missense_Mutation     | SNP | 37 |
| 6 | SLC16A14 | uc002vqd.2 | Missense_Mutation     | SNP | 37 |
| 6 | LCT      | uc002tuu.1 | Missense_Mutation     | SNP | 37 |
| 6 | PION     | uc003ugf.3 | Silent                | SNP | 37 |
| 6 | PKHD1L1  | uc003yne.3 | Missense_Mutation     | SNP | 37 |
| 6 | ZNF831   | uc002yan.3 | Missense_Mutation     | SNP | 37 |
| 6 | DCC      | uc002lfe.2 | Missense_Mutation     | SNP | 37 |
| 6 | CFH      | uc001gtj.4 | Missense_Mutation     | SNP | 37 |
| 6 | SRRM5    | uc002oxb.2 | Missense_Mutation     | SNP | 37 |
| 6 | SZT2     | uc001cjk.2 | Splice_Site           | SNP | 37 |
| 6 | CACNA1B  | uc004cog.3 | Missense_Mutation     | SNP | 37 |
| 6 | FAM171A1 | uc001iob.3 | Missense_Mutation     | SNP | 37 |
| 6 | GPR142   | uc021ucp.1 | Silent                | SNP | 37 |
| 6 | HIBCH    | uc002uru.3 | Missense_Mutation     | SNP | 37 |
| 6 | FBN3     | uc002mjf.3 | Missense_Mutation     | SNP | 37 |
| 6 | SERPINE1 | uc003uxt.3 | Silent                | SNP | 37 |
| 6 | LRRC14   | uc003zdk.2 | Silent                | SNP | 37 |
| 6 | LAMA5    | uc002ycq.3 | Silent                | SNP | 37 |
| 6 | EIF4G3   | uc001bef.3 | Silent                | SNP | 37 |
| 6 | SERPINA9 | uc001ydf.3 | 5'UTR                 | SNP | 37 |
| 6 | MAEL     | uc001gdy.1 | Missense_Mutation     | SNP | 37 |
| 6 | COL4A1   | uc001vqw.4 | Missense_Mutation     | SNP | 37 |
| 6 | SLC4A2   | uc022apz.1 | Missense_Mutation     | SNP | 37 |



|   |           |            |                   |     |    |
|---|-----------|------------|-------------------|-----|----|
| 6 | MCM2      | uc003ejp.3 | Missense_Mutation | SNP | 37 |
| 6 | RGMB      | uc003knc.3 | 3'UTR             | SNP | 37 |
| 6 | IQCF2     | uc003dbt.1 | Silent            | SNP | 37 |
| 6 | ZGPAT     | uc002ygp.4 | Missense_Mutation | SNP | 37 |
| 6 | NALCN     | uc001vox.1 | Missense_Mutation | SNP | 37 |
| 6 | PLEKHG3   | uc001xhp.2 | Missense_Mutation | SNP | 37 |
| 6 | MUC16     | uc002mkp.3 | Silent            | SNP | 37 |
| 6 | CDH12     | uc010iuc.2 | 5'UTR             | SNP | 37 |
| 6 | PLCB2     | uc001zld.3 | Missense_Mutation | SNP | 37 |
| 6 | FAM71B    | uc003lwn.3 | Missense_Mutation | SNP | 37 |
| 6 | ZNF578    | uc002pzp.4 | 3'UTR             | SNP | 37 |
| 6 | CPZ       | uc003glm.3 | Silent            | SNP | 37 |
| 6 | SCN2B     | uc001psf.2 | Silent            | SNP | 37 |
| 6 | CASP10    | uc002uxj.1 | Missense_Mutation | SNP | 37 |
| 6 | ZNF837    | uc002qsm.3 | Missense_Mutation | SNP | 37 |
| 6 | ADAM32    | uc003xmt.4 | Missense_Mutation | SNP | 37 |
| 6 | GCNT3     | uc002age.3 | Nonsense_Mutation | SNP | 37 |
| 6 | SCGN      | uc003nfb.3 | 3'UTR             | SNP | 37 |
| 6 | NEK10     | uc003cdt.2 | Missense_Mutation | SNP | 37 |
| 6 | PPARA     | uc003bgw.1 | Missense_Mutation | SNP | 37 |
| 6 | CNTN1     | uc001rmm.1 | 3'UTR             | SNP | 37 |
| 6 | GABARAPL1 | uc010shb.1 | Missense_Mutation | SNP | 37 |
| 6 | CTNNBL1   | uc021wdj.1 | Missense_Mutation | SNP | 37 |
| 6 | TMCO5A    | uc001zjw.3 | Missense_Mutation | SNP | 37 |
| 6 | EPO       | uc003uwi.3 | Missense_Mutation | SNP | 37 |
| 6 | KIAA1328  | uc002lad.3 | 3'UTR             | SNP | 37 |
| 6 | BC040865  | uc003wkn.3 | 5'UTR             | SNP | 37 |
| 6 | MUC16     | uc002mkp.3 | Missense_Mutation | SNP | 37 |
| 6 | LOC150776 | uc010fna.3 | Missense_Mutation | SNP | 37 |
| 6 | PLEKHF1   | uc002nsi.4 | Silent            | SNP | 37 |
| 6 | NLRP1     | uc010clh.3 | Missense_Mutation | SNP | 37 |
| 6 | LIMCH1    | uc003gvz.4 | Splice_Site       | SNP | 37 |
| 6 | KCND2     | uc003vjj.1 | 5'UTR             | SNP | 37 |
| 6 | RPS9      | uc002qdx.3 | Missense_Mutation | SNP | 37 |
| 6 | KIAA1217  | uc001iru.4 | Silent            | SNP | 37 |
| 6 | PLD2      | uc002fzc.3 | Missense_Mutation | SNP | 37 |
| 6 | ADAM28    | uc003xdy.3 | 3'UTR             | SNP | 37 |
| 6 | TPM2      | uc003zxq.3 | Silent            | SNP | 37 |
| 6 | USP34     | uc002sbe.3 | Nonsense_Mutation | SNP | 37 |
| 6 | DNAH2     | uc002giu.1 | Missense_Mutation | SNP | 37 |
| 6 | MXRA5     | uc004crg.4 | Missense_Mutation | SNP | 37 |
| 6 | GYS2      | uc001rfb.3 | 3'UTR             | SNP | 37 |
| 6 | CFHR2     | uc001gtq.1 | Missense_Mutation | SNP | 37 |

|   |          |            |                       |     |    |
|---|----------|------------|-----------------------|-----|----|
| 6 | CCNT2    | uc002tuc.2 | Missense_Mutation     | SNP | 37 |
| 6 | USP32    | uc002iyo.1 | Missense_Mutation     | SNP | 37 |
| 6 | CPNE3    | uc003ydv.2 | Missense_Mutation     | SNP | 37 |
| 6 | WBSCR17  | uc003tvy.3 | Missense_Mutation     | SNP | 37 |
| 6 | WDR44    | uc004eqn.3 | Missense_Mutation     | SNP | 37 |
| 6 | GPC2     | uc003utv.3 | 3'UTR                 | SNP | 37 |
| 6 | CAPN13   | uc021vfn.1 | Missense_Mutation     | SNP | 37 |
| 6 | TAS2R38  | uc003vwx.1 | Silent                | SNP | 37 |
| 6 | KIAA1210 | uc004era.4 | Silent                | SNP | 37 |
| 6 | ASXL3    | uc010dmg.1 | Missense_Mutation     | SNP | 37 |
| 6 | PAX6     | uc001mtg.4 | 3'UTR                 | SNP | 37 |
| 6 | TMPRSS5  | uc001poc.4 | Missense_Mutation     | SNP | 37 |
| 6 | DDX27    | uc002xuh.3 | Silent                | SNP | 37 |
| 6 | RPH3A    | uc010syl.2 | Missense_Mutation     | SNP | 37 |
| 6 | OR1A2    | uc002fvd.1 | Missense_Mutation     | SNP | 37 |
| 6 | LTN1     | uc002ymr.2 | Missense_Mutation     | SNP | 37 |
| 6 | FAM55A   | uc001ppa.3 | Missense_Mutation     | SNP | 37 |
| 6 | AX746996 | uc001yov.1 | Missense_Mutation     | SNP | 37 |
| 6 | DDHD1    | uc001xai.3 | Missense_Mutation     | SNP | 37 |
| 6 | BCAM     | uc002ozu.3 | Missense_Mutation     | SNP | 37 |
| 6 | ANGEL1   | uc001xsv.3 | 5'UTR                 | SNP | 37 |
| 6 | UNC80    | uc010zjc.1 | Missense_Mutation     | SNP | 37 |
| 6 | OR14A16  | uc001idm.1 | Missense_Mutation     | SNP | 37 |
| 6 | FBXO40   | uc003eeg.2 | Silent                | SNP | 37 |
| 6 | MKRN7P   | uc010zxt.2 | Non-coding_Transcript | SNP | 37 |
| 6 | MLL2     | uc001rta.4 | Silent                | SNP | 37 |
| 6 | SGTA     | uc002lwi.1 | Missense_Mutation     | SNP | 37 |
| 6 | ITGAD    | uc010cap.1 | Missense_Mutation     | SNP | 37 |
| 6 | PTPRT    | uc010ggj.3 | Nonsense_Mutation     | SNP | 37 |
| 6 | TCF7     | uc003kyz.3 | Missense_Mutation     | SNP | 37 |
| 6 | DLEC1    | uc003chp.1 | Missense_Mutation     | SNP | 37 |
| 6 | OR5AN1   | uc010rks.2 | Silent                | SNP | 37 |
| 6 | NLRP12   | uc002qcj.4 | Silent                | SNP | 37 |
| 6 | FRMPD1   | uc011lqn.2 | 3'UTR                 | SNP | 37 |
| 6 | TEX15    | uc003xil.3 | Missense_Mutation     | SNP | 37 |
| 6 | TRIM21   | uc001lyy.1 | Missense_Mutation     | SNP | 37 |
| 6 | SNIP1    | uc001cbi.3 | Missense_Mutation     | SNP | 37 |
| 6 | B3GNT6   | uc021qnp.1 | Silent                | SNP | 37 |
| 6 | EVL      | uc001ygu.3 | Missense_Mutation     | SNP | 37 |
| 6 | FAM129A  | uc001gra.3 | Silent                | SNP | 37 |
| 6 | THBS2    | uc003qwt.3 | Nonsense_Mutation     | SNP | 37 |
| 6 | ALDH1B1  | uc004aay.3 | Silent                | SNP | 37 |
| 6 | USP19    | uc003cvz.4 | Missense_Mutation     | SNP | 37 |

|   |          |            |                       |     |    |
|---|----------|------------|-----------------------|-----|----|
| 6 | TPTE     | uc002yip.1 | Silent                | SNP | 37 |
| 6 | SPINT1   | uc001zna.3 | 5'UTR                 | SNP | 37 |
| 6 | TPRKB    | uc002sjm.2 | 3'UTR                 | SNP | 37 |
| 6 | CEP290   | uc001tar.3 | Missense_Mutation     | SNP | 37 |
| 6 | ZBP1     | uc002xyo.3 | 3'UTR                 | SNP | 37 |
| 6 | SCN11A   | uc021wvy.1 | Missense_Mutation     | SNP | 37 |
| 6 | STRN     | uc002rpn.3 | Missense_Mutation     | SNP | 37 |
| 6 | KIF25    | uc003qwk.1 | Splice_Site           | SNP | 37 |
| 6 | C1orf94  | uc001bxt.3 | Splice_Site           | SNP | 37 |
| 6 | RGPD4    | uc010ywk.2 | 5'UTR                 | SNP | 37 |
| 6 | EFCAB4B  | uc010sen.1 | Silent                | SNP | 37 |
| 6 | C17orf66 | uc002hke.1 | 3'UTR                 | SNP | 37 |
| 6 | TTC6     | uc001wug.3 | Non-coding_Transcript | SNP | 37 |
| 6 | PPP1R3A  | uc010lly.1 | Missense_Mutation     | SNP | 37 |
| 6 | PIEZO2   | uc002kos.2 | Silent                | SNP | 37 |
| 6 | GPC1     | uc002vyw.4 | Splice_Site           | SNP | 37 |
| 6 | KAT2B    | uc003cbq.3 | Missense_Mutation     | SNP | 37 |
| 6 | DDX54    | uc001tuq.4 | Missense_Mutation     | SNP | 37 |
| 6 | POLE     | uc001uks.1 | Silent                | SNP | 37 |
| 6 | SNRPD2   | uc002pcw.3 | 5'UTR                 | SNP | 37 |
| 6 | FGA      | uc003iod.1 | 5'UTR                 | SNP | 37 |
| 6 | MYO1F    | uc002mkg.3 | Silent                | SNP | 37 |
| 6 | AL832797 | uc001osl.3 | Silent                | SNP | 37 |
| 6 | CFB      | uc003nyi.2 | Missense_Mutation     | SNP | 37 |
| 6 | EHMT2    | uc003nxx.1 | 5'UTR                 | SNP | 37 |
| 6 | ESRRG    | uc001hxx.2 | Missense_Mutation     | SNP | 37 |
| 6 | TCRA     | uc001wbw.2 | Intron                | SNP | 37 |
| 6 | MKL1     | uc003ayw.1 | 3'UTR                 | SNP | 37 |
| 6 | ARHGAP18 | uc003qbr.3 | Missense_Mutation     | SNP | 37 |
| 6 | PNPLA6   | uc010xjq.2 | 3'UTR                 | SNP | 37 |
| 6 | ST7      | uc003vix.1 | 3'UTR                 | SNP | 37 |
| 6 | CHRNA7   | uc021sic.1 | Missense_Mutation     | SNP | 37 |
| 6 | MLIP     | uc011dxa.2 | Missense_Mutation     | SNP | 37 |
| 6 | EXOG     | uc003cih.2 | Silent                | SNP | 37 |
| 6 | WDPCP    | uc002sch.3 | Missense_Mutation     | SNP | 37 |
| 6 | TRIOBP   | uc003atr.3 | Silent                | SNP | 37 |
| 6 | DDX53    | uc004daj.3 | Missense_Mutation     | SNP | 37 |
| 6 | CABP2    | uc001ome.1 | 3'UTR                 | SNP | 37 |
| 6 | FZD6     | uc003ylh.3 | Missense_Mutation     | SNP | 37 |
| 6 | RANBP2   | uc002tem.4 | Missense_Mutation     | SNP | 37 |
| 6 | AK127974 | uc002gxc.1 | Non-coding_Transcript | SNP | 37 |
| 6 | MOCS1    | uc003opb.3 | Missense_Mutation     | SNP | 37 |
| 6 | LPHN2    | uc001dit.4 | Missense_Mutation     | SNP | 37 |

|   |               |            |                       |     |    |
|---|---------------|------------|-----------------------|-----|----|
| 6 | DKFZp779M0652 | uc001nbn.3 | 5'UTR                 | SNP | 37 |
| 6 | MYO7A         | uc001oyb.2 | Intron                | SNP | 37 |
| 6 | RBMXL2        | uc001mfc.2 | Missense_Mutation     | SNP | 37 |
| 6 | HERC2P3       | uc001ytg.3 | Missense_Mutation     | SNP | 37 |
| 6 | LY75-CD302    | uc002ubb.4 | Missense_Mutation     | SNP | 37 |
| 6 | C3orf22       | uc003ejb.3 | Missense_Mutation     | SNP | 37 |
| 6 | MLL3          | uc003wla.3 | Missense_Mutation     | SNP | 37 |
| 6 | MAVS          | uc002wjw.4 | Missense_Mutation     | SNP | 37 |
| 6 | SLC28A1       | uc002blf.3 | 3'UTR                 | SNP | 37 |
| 6 | ITGA3         | uc010dbm.3 | Silent                | SNP | 37 |
| 6 | AUP1          | uc010yrx.2 | 5'UTR                 | SNP | 37 |
| 6 | KIAA1324L     | uc011kha.2 | Missense_Mutation     | SNP | 37 |
| 6 | ZNF668        | uc021tgt.1 | Missense_Mutation     | SNP | 37 |
| 6 | CAPRIN2       | uc001rji.1 | Missense_Mutation     | SNP | 37 |
| 6 | LOC100128682  | uc002nzf.1 | Non-coding_Transcript | SNP | 37 |
| 6 | RLF           | uc001cfc.4 | Missense_Mutation     | SNP | 37 |
| 6 | IL36RN        | uc002tis.3 | Missense_Mutation     | SNP | 37 |
| 6 | TMEM216       | uc021qkf.1 | 5'UTR                 | SNP | 37 |
| 6 | RPL23         | uc002hqx.1 | 5'UTR                 | SNP | 37 |
| 6 | FNDC4         | uc002rkx.3 | 3'UTR                 | SNP | 37 |
| 6 | PLA2G4D       | uc001zox.3 | 5'UTR                 | SNP | 37 |
| 6 | ITSN2         | uc002rfe.2 | Silent                | SNP | 37 |
| 6 | FAM5C         | uc001gse.1 | Missense_Mutation     | SNP | 37 |
| 6 | AQP7P1        | uc004aen.1 | Intron                | SNP | 37 |
| 6 | BCL7C         | uc021tgq.1 | Intron                | SNP | 37 |
| 6 | AK124439      | uc002rll.1 | Missense_Mutation     | SNP | 37 |
| 6 | MPI           | uc010ulv.2 | 3'UTR                 | SNP | 37 |
| 6 | RNF133        | uc003vki.1 | Missense_Mutation     | SNP | 37 |
| 6 | DNM1P46       | uc021sxl.1 | Non-coding_Transcript | SNP | 37 |
| 6 | BC017347      | uc001fkv.3 | Missense_Mutation     | SNP | 37 |
| 6 | ADCK1         | uc001xui.3 | Missense_Mutation     | SNP | 37 |
| 6 | ANKRD18A      | uc010mmd.1 | Missense_Mutation     | SNP | 37 |
| 6 | ADARB1        | uc002zgy.2 | Missense_Mutation     | SNP | 37 |
| 6 | FAM221A       | uc003swo.4 | Intron                | SNP | 37 |
| 6 | CCDC88C       | uc010aty.3 | Missense_Mutation     | SNP | 37 |
| 6 | GGCX          | uc002sps.3 | Silent                | SNP | 37 |
| 6 | THADA         | uc002rsw.4 | Missense_Mutation     | SNP | 37 |
| 6 | PRDM16        | uc001akf.3 | Missense_Mutation     | SNP | 37 |
| 6 | FPR1          | uc021uyn.1 | Missense_Mutation     | SNP | 37 |
| 6 | PPIAL4G       | uc001ejt.3 | Missense_Mutation     | SNP | 37 |
| 6 | SUPT6H        | uc010crt.3 | Missense_Mutation     | SNP | 37 |
| 6 | OR51I2        | uc010qzf.2 | Missense_Mutation     | SNP | 37 |
| 6 | CCDC25        | uc003xgc.3 | Splice_Site           | SNP | 37 |

|   |          |            |                   |     |    |
|---|----------|------------|-------------------|-----|----|
| 6 | SPEF2    | uc003jir.3 | Missense_Mutation | SNP | 37 |
| 6 | HYDIN    | uc002ezr.3 | Silent            | SNP | 37 |
| 6 | LOC93432 | uc003vwz.3 | Missense_Mutation | SNP | 37 |
| 6 | CCNF     | uc002cqd.1 | Silent            | SNP | 37 |
| 6 | SLC5A11  | uc002dmu.3 | Missense_Mutation | SNP | 37 |
| 6 | PAX6     | uc001mtg.4 | Missense_Mutation | SNP | 37 |
| 6 | ZFP57    | uc011dlw.2 | Missense_Mutation | SNP | 37 |
| 6 | SF3B1    | uc002uue.3 | Missense_Mutation | SNP | 37 |
| 6 | CD200R1  | uc003dzj.1 | 5'UTR             | SNP | 37 |
| 6 | SLC6A19  | uc003jbw.4 | Missense_Mutation | SNP | 37 |
| 6 | ALG13    | uc011msy.2 | Missense_Mutation | SNP | 37 |
| 6 | PARP11   | uc001qml.2 | 5'UTR             | SNP | 37 |
| 6 | AK308561 | uc010mng.1 | 5'Flank           | SNP | 37 |
| 6 | FCRL3    | uc001fqz.4 | Missense_Mutation | SNP | 37 |
| 6 | CD80     | uc003ecq.3 | Missense_Mutation | SNP | 37 |
| 6 | COL28A1  | uc003src.1 | Silent            | SNP | 37 |
| 6 | RNF40    | uc002dzq.3 | Silent            | SNP | 37 |
| 6 | OTOP3    | uc010wrr.2 | Missense_Mutation | SNP | 37 |
| 6 | PCDHGC5  | uc003lkf.2 | Missense_Mutation | SNP | 37 |
| 6 | CTNNA2   | uc010ysh.2 | Missense_Mutation | SNP | 37 |
| 6 | COL6A3   | uc002vwl.2 | Missense_Mutation | SNP | 37 |
| 6 | SIX5     | uc002pdb.3 | Silent            | SNP | 37 |
| 6 | HJURP    | uc002vvg.3 | Missense_Mutation | SNP | 37 |
| 6 | ATG7     | uc003bwc.3 | Splice_Site       | SNP | 37 |
| 6 | GABRB1   | uc003gxh.3 | Missense_Mutation | SNP | 37 |
| 6 | CATSPERB | uc001xzs.1 | Missense_Mutation | SNP | 37 |
| 6 | INADL    | uc001dab.3 | Silent            | SNP | 37 |
| 6 | ZNF335   | uc002xqw.3 | Missense_Mutation | SNP | 37 |
| 6 | BC036435 | uc021ogr.1 | 5'Flank           | SNP | 37 |
| 6 | ARHGEF16 | uc001akg.4 | Silent            | SNP | 37 |
| 6 | FOXS1    | uc002wwt.1 | 3'UTR             | SNP | 37 |
| 6 | DTX1     | uc001tuk.1 | Missense_Mutation | SNP | 37 |
| 6 | NMNAT3   | uc003etj.3 | Silent            | SNP | 37 |
| 6 | RBMXL2   | uc001mfc.2 | Missense_Mutation | SNP | 37 |
| 6 | OR2AK2   | uc010pzd.2 | Missense_Mutation | SNP | 37 |
| 6 | HIST3H2A | uc001hsy.3 | Silent            | SNP | 37 |
| 6 | LIPG     | uc002ldu.1 | Silent            | SNP | 37 |
| 6 | SUSD2    | uc002zzn.1 | Silent            | SNP | 37 |
| 6 | SAFB     | uc002mcg.3 | Missense_Mutation | SNP | 37 |
| 6 | FMNL1    | uc002iin.3 | Missense_Mutation | SNP | 37 |
| 6 | SPATA18  | uc003gzl.3 | Missense_Mutation | SNP | 37 |
| 6 | INSR     | uc002mgd.1 | Silent            | SNP | 37 |
| 6 | GNPAT    | uc001hup.4 | Silent            | SNP | 37 |

|   |          |            |                       |     |    |
|---|----------|------------|-----------------------|-----|----|
| 6 | TTN      | uc021vsy.1 | Silent                | SNP | 37 |
| 6 | ZNF141   | uc003gaa.2 | Missense_Mutation     | SNP | 37 |
| 6 | HIST1H3F | uc003nhg.1 | Missense_Mutation     | SNP | 37 |
| 6 | SSX2IP   | uc001dkh.3 | Missense_Mutation     | SNP | 37 |
| 6 | ANKS1B   | uc001tgi.3 | Missense_Mutation     | SNP | 37 |
| 6 | ZNF233   | uc021uvi.1 | Nonsense_Mutation     | SNP | 37 |
| 6 | HLA-DMB  | uc003ocl.2 | 5'UTR                 | SNP | 37 |
| 6 | OR4B1    | uc010rhs.2 | Missense_Mutation     | SNP | 37 |
| 6 | GLRA2    | uc010neq.3 | Silent                | SNP | 37 |
| 6 | MED12L   | uc003eyp.3 | Missense_Mutation     | SNP | 37 |
| 6 | ABCC8    | uc001mnc.3 | Silent                | SNP | 37 |
| 6 | WDR93    | uc002boj.3 | Missense_Mutation     | SNP | 37 |
| 6 | FAM123C  | uc002trw.2 | Silent                | SNP | 37 |
| 6 | CHD3     | uc002gjd.2 | Missense_Mutation     | SNP | 37 |
| 6 | NET1     | uc001iia.3 | Missense_Mutation     | SNP | 37 |
| 6 | HDAC4    | uc002vyk.4 | Missense_Mutation     | SNP | 37 |
| 6 | ACOX2    | uc003dkl.3 | Silent                | SNP | 37 |
| 6 | CHRNA2   | uc010lur.3 | Missense_Mutation     | SNP | 37 |
| 6 | CARS     | uc001lxf.3 | Silent                | SNP | 37 |
| 6 | COL4A4   | uc021vxr.1 | Silent                | SNP | 37 |
| 6 | MAFB     | uc002xji.3 | Missense_Mutation     | SNP | 37 |
| 6 | SRRD     | uc010gve.3 | 3'UTR                 | SNP | 37 |
| 6 | APBA3    | uc002lyp.1 | Silent                | SNP | 37 |
| 6 | TOX2     | uc010ggo.3 | 3'UTR                 | SNP | 37 |
| 6 | FAM27L   | uc002gyz.3 | Non-coding_Transcript | SNP | 37 |
| 6 | TECPR2   | uc001ylw.2 | Missense_Mutation     | SNP | 37 |
| 6 | OR4D5    | uc001pzk.1 | Silent                | SNP | 37 |
| 6 | NTSR2    | uc002rbq.4 | 5'UTR                 | SNP | 37 |
| 6 | PTH2R    | uc010zjb.2 | Silent                | SNP | 37 |
| 6 | FANCB    | uc004cwg.1 | Silent                | SNP | 37 |
| 6 | SDK1     | uc003smx.3 | Missense_Mutation     | SNP | 37 |
| 6 | PCDHAC2  | uc003lic.2 | Silent                | SNP | 37 |
| 6 | SOX6     | uc001mme.3 | 3'UTR                 | SNP | 37 |
| 6 | ADH1C    | uc021xqi.1 | Non-coding_Transcript | SNP | 37 |
| 6 | BRPF3    | uc003olv.4 | Missense_Mutation     | SNP | 37 |
| 6 | GFM1     | uc003fce.3 | Missense_Mutation     | SNP | 37 |
| 6 | PIK3C2A  | uc009ygu.1 | 3'UTR                 | SNP | 37 |
| 6 | OPRK1    | uc010lyc.1 | 5'UTR                 | SNP | 37 |
| 6 | UROC1    | uc010hsi.2 | Missense_Mutation     | SNP | 37 |
| 6 | HRNR     | uc001ezt.1 | Missense_Mutation     | SNP | 37 |
| 6 | SP140    | uc002vql.3 | Splice_Site           | SNP | 37 |
| 6 | COL6A5   | uc010htj.1 | Silent                | SNP | 37 |
| 6 | ZFYVE28  | uc003gex.2 | Missense_Mutation     | SNP | 37 |

|   |              |            |                       |     |    |
|---|--------------|------------|-----------------------|-----|----|
| 6 | C11orf49     | uc001ndq.3 | 3'UTR                 | SNP | 37 |
| 6 | HEATR8       | uc010oog.1 | Silent                | SNP | 37 |
| 6 | TMC7         | uc002dfp.2 | Missense_Mutation     | SNP | 37 |
| 6 | ANXA8L1      | uc001jed.4 | Intron                | SNP | 37 |
| 6 | UGT2A3       | uc003hef.2 | Missense_Mutation     | SNP | 37 |
| 6 | CLIC6        | uc010gmt.1 | Missense_Mutation     | SNP | 37 |
| 6 | SLC3A2       | uc001nwc.3 | Missense_Mutation     | SNP | 37 |
| 6 | CASR         | uc003eew.4 | Silent                | SNP | 37 |
| 6 | KIR2DL1      | uc010erz.1 | Missense_Mutation     | SNP | 37 |
| 6 | ZNF529       | uc010xth.2 | Missense_Mutation     | SNP | 37 |
| 6 | CDH20        | uc010dps.1 | Missense_Mutation     | SNP | 37 |
| 6 | TBX3         | uc001tvf.1 | Missense_Mutation     | SNP | 37 |
| 6 | MAGI2        | uc011kgs.1 | Missense_Mutation     | SNP | 37 |
| 6 | HHIPL2       | uc001hnh.1 | Silent                | SNP | 37 |
| 6 | WDR44        | uc004eqn.3 | Missense_Mutation     | SNP | 37 |
| 6 | HEMK1        | uc003dau.3 | 3'UTR                 | SNP | 37 |
| 6 | LRRC16A      | uc011djw.2 | Intron                | SNP | 37 |
| 6 | LUZP2        | uc001mqs.3 | Missense_Mutation     | SNP | 37 |
| 6 | B4GALT4      | uc003ece.1 | 3'UTR                 | SNP | 37 |
| 6 | JAM2         | uc002yfp.1 | Silent                | SNP | 37 |
| 6 | GIMAP4       | uc011kuv.2 | Missense_Mutation     | SNP | 37 |
| 6 | PDZD2        | uc003jhl.3 | Silent                | SNP | 37 |
| 6 | VWA3B        | uc002syo.3 | Missense_Mutation     | SNP | 37 |
| 6 | KRT75        | uc001saj.2 | Missense_Mutation     | SNP | 37 |
| 6 | HDAC5        | uc002iff.1 | Missense_Mutation     | SNP | 37 |
| 6 | ZFP57        | uc011dlw.2 | 5'Flank               | SNP | 37 |
| 6 | CTAGE11P     | uc010ths.2 | 3'UTR                 | SNP | 37 |
| 6 | COL4A6       | uc004enw.4 | Silent                | SNP | 37 |
| 6 | PPP5C        | uc002pem.3 | Silent                | SNP | 37 |
| 6 | LOC100133050 | uc011cuw.1 | Non-coding_Transcript | SNP | 37 |
| 6 | CUEDC1       | uc002ivd.1 | Silent                | SNP | 37 |
| 6 | ATXN3L       | uc010ned.3 | Missense_Mutation     | SNP | 37 |
| 6 | MYO15B       | uc002jor.1 | Missense_Mutation     | SNP | 37 |
| 6 | CDH2         | uc002kww.2 | Missense_Mutation     | SNP | 37 |
| 6 | TTN          | uc021vsy.1 | Silent                | SNP | 37 |
| 6 | TTBK1        | uc003ouq.1 | Missense_Mutation     | SNP | 37 |
| 6 | PSMC6        | uc010tqx.2 | Missense_Mutation     | SNP | 37 |
| 6 | HMGCLL1      | uc003pcn.3 | Missense_Mutation     | SNP | 37 |
| 6 | PCM1         | uc022asj.1 | Missense_Mutation     | SNP | 37 |
| 6 | MET          | uc010lkh.3 | Silent                | SNP | 37 |
| 6 | GABRA6       | uc003lyu.2 | 5'UTR                 | SNP | 37 |
| 6 | KEL          | uc003wcb.3 | Missense_Mutation     | SNP | 37 |
| 6 | LHX9         | uc001guk.1 | Missense_Mutation     | SNP | 37 |

|   |           |            |                       |     |    |
|---|-----------|------------|-----------------------|-----|----|
| 6 | DPCR1     | uc003nsg.2 | Missense_Mutation     | SNP | 37 |
| 6 | DDX43     | uc003pgw.3 | Missense_Mutation     | SNP | 37 |
| 6 | DQ593627  | uc002byj.3 | 5'Flank               | SNP | 37 |
| 6 | ADCK2     | uc003vvy.1 | Silent                | SNP | 37 |
| 6 | TTN       | uc021vsy.1 | Silent                | SNP | 37 |
| 6 | ATL3      | uc010rms.1 | 5'UTR                 | SNP | 37 |
| 6 | NBEA      | uc021rid.1 | 3'UTR                 | SNP | 37 |
| 6 | LOC554223 | uc010jrm.1 | Intron                | SNP | 37 |
| 6 | MYO18B    | uc003abz.1 | Nonsense_Mutation     | SNP | 37 |
| 6 | HYDIN     | uc010yih.1 | Non-coding_Transcript | SNP | 37 |
| 6 | MCOLN1    | uc002mgo.3 | Nonsense_Mutation     | SNP | 37 |
| 6 | ZNF286B   | uc010vyd.1 | Intron                | SNP | 37 |
| 6 | WDR87     | uc002ohj.2 | Missense_Mutation     | SNP | 37 |
| 6 | AK128833  | uc001acx.1 | Silent                | SNP | 37 |
| 6 | PAX8      | uc010yxt.2 | Missense_Mutation     | SNP | 37 |
| 6 | MEFV      | uc002cun.1 | Missense_Mutation     | SNP | 37 |
| 6 | CREB3L1   | uc021qil.1 | Missense_Mutation     | SNP | 37 |
| 6 | ASZ1      | uc003vjb.2 | 5'UTR                 | SNP | 37 |
| 6 | LOC390858 | uc010xei.1 | Missense_Mutation     | SNP | 37 |
| 6 | ZC3H6     | uc002thq.1 | Nonsense_Mutation     | SNP | 37 |
| 6 | OS9       | uc001spj.3 | Silent                | SNP | 37 |
| 6 | MB        | uc003anz.3 | Missense_Mutation     | SNP | 37 |
| 6 | EPB41L3   | uc002kmt.1 | Silent                | SNP | 37 |
| 6 | CPXM1     | uc002wgu.3 | Silent                | SNP | 37 |
| 6 | EIF5B     | uc002tab.3 | Missense_Mutation     | SNP | 37 |
| 6 | PCLO      | uc003uhx.2 | Missense_Mutation     | SNP | 37 |
| 6 | ARHGEF5   | uc003wel.3 | Missense_Mutation     | SNP | 37 |
| 6 | RIBC2     | uc011aqs.2 | Silent                | SNP | 37 |
| 6 | FAM178B   | uc002sxl.4 | Silent                | SNP | 37 |
| 6 | SF3B2     | uc001ogy.1 | Silent                | SNP | 37 |
| 6 | PIK3C2G   | uc010sib.2 | Missense_Mutation     | SNP | 37 |
| 6 | SLC22A14  | uc010hhc.1 | Silent                | SNP | 37 |
| 6 | FILIP1L   | uc003dtm.3 | Missense_Mutation     | SNP | 37 |
| 6 | KCNG4     | uc010voc.2 | Silent                | SNP | 37 |
| 6 | C11orf1   | uc001pme.3 | 5'UTR                 | SNP | 37 |
| 6 | ATAD3C    | uc001aft.2 | Silent                | SNP | 37 |
| 6 | TRIM29    | uc001pwz.3 | Missense_Mutation     | SNP | 37 |
| 6 | KRT16     | uc002hxg.4 | Missense_Mutation     | SNP | 37 |
| 6 | RGMA      | uc010urc.2 | Silent                | SNP | 37 |
| 6 | SULF1     | uc010lza.1 | Missense_Mutation     | SNP | 37 |
| 6 | C18orf1   | uc002ksa.2 | 5'UTR                 | SNP | 37 |
| 6 | ABCB4     | uc003uiv.1 | Splice_Site           | SNP | 37 |
| 6 | COL22A1   | uc003yvd.3 | Missense_Mutation     | SNP | 37 |



|   |          |            |                   |     |    |
|---|----------|------------|-------------------|-----|----|
| 6 | TAF1     | uc004dzt.4 | 5'UTR             | SNP | 37 |
| 6 | DGKI     | uc003vtt.3 | Missense_Mutation | SNP | 37 |
| 6 | ARAP2    | uc003gsq.2 | Missense_Mutation | SNP | 37 |
| 6 | WDR44    | uc004eqn.3 | Silent            | SNP | 37 |
| 6 | MYO15A   | uc021trm.1 | Silent            | SNP | 37 |
| 6 | MAPK12   | uc003bkm.1 | Silent            | SNP | 37 |
| 6 | OR4N4    | uc001yuc.1 | Missense_Mutation | SNP | 37 |
| 6 | ST18     | uc003xqz.2 | Missense_Mutation | SNP | 37 |
| 6 | EIF4B    | uc010snu.2 | 5'UTR             | SNP | 37 |
| 6 | GAS2     | uc009yie.3 | Missense_Mutation | SNP | 37 |
| 6 | DOM3Z    | uc003nyp.1 | Missense_Mutation | SNP | 37 |
| 6 | ZP1      | uc001nqd.3 | Missense_Mutation | SNP | 37 |
| 6 | ALPPL2   | uc002vss.4 | Silent            | SNP | 37 |
| 6 | TRAPPC8  | uc002kxc.4 | Missense_Mutation | SNP | 37 |
| 6 | Unknown  |            | IGR               | SNP | 37 |
| 6 | PPTC7    | uc001trh.1 | Silent            | SNP | 37 |
| 6 | PLCXD3   | uc003jmm.1 | Intron            | SNP | 37 |
| 6 | MSLN     | uc002cjw.2 | Missense_Mutation | SNP | 37 |
| 6 | ELF5     | uc001mvq.2 | 3'UTR             | SNP | 37 |
| 6 | DNAH14   | uc001how.2 | Missense_Mutation | SNP | 37 |
| 6 | TTN      | uc021vsy.1 | Missense_Mutation | SNP | 37 |
| 6 | NOTCH4   | uc003obb.3 | Nonsense_Mutation | SNP | 37 |
| 6 | ADAMTSL5 | uc010xgq.1 | Silent            | SNP | 37 |
| 6 | PHKG1    | uc011kdb.1 | Missense_Mutation | SNP | 37 |
| 6 | LPIN3    | uc010ggh.3 | Silent            | SNP | 37 |
| 6 | TPO      | uc002qwr.3 | Silent            | SNP | 37 |
| 6 | SH3GL3   | uc002bjj.3 | 3'UTR             | SNP | 37 |
| 6 | UNC5D    | uc003xjr.2 | Missense_Mutation | SNP | 37 |
| 6 | AB231705 | uc001pli.1 | Missense_Mutation | SNP | 37 |
| 6 | PRSS21   | uc002crt.3 | Silent            | SNP | 37 |
| 6 | SORCS2   | uc003gkb.4 | Missense_Mutation | SNP | 37 |
| 6 | VPS41    | uc003tgy.3 | Missense_Mutation | SNP | 37 |
| 6 | F13A1    | uc003mwv.3 | Missense_Mutation | SNP | 37 |
| 6 | MUTYH    | uc010oll.2 | Missense_Mutation | SNP | 37 |
| 6 | CSMD3    | uc003ynu.3 | Missense_Mutation | SNP | 37 |
| 6 | SNAP47   | uc001hrf.2 | Missense_Mutation | SNP | 37 |
| 6 | Unknown  |            | IGR               | SNP | 37 |
| 6 | ST18     | uc003xqz.2 | Missense_Mutation | SNP | 37 |
| 6 | IGFLR1   | uc010eej.3 | Missense_Mutation | SNP | 37 |
| 6 | SI       | uc003fei.3 | Missense_Mutation | SNP | 37 |
| 6 | ATP8B3   | uc002ltw.3 | Missense_Mutation | SNP | 37 |
| 6 | OTUD7A   | uc001zfr.3 | Missense_Mutation | SNP | 37 |
| 6 | KRT73    | uc001sas.3 | Missense_Mutation | SNP | 37 |

|   |              |            |                   |     |    |
|---|--------------|------------|-------------------|-----|----|
| 6 | PIN4         | uc004eam.3 | Silent            | SNP | 37 |
| 6 | MAP7D2       | uc010nfo.2 | Silent            | SNP | 37 |
| 6 | PCDHB3       | uc003lio.3 | Missense_Mutation | SNP | 37 |
| 6 | GPC2         | uc003utv.3 | 3'UTR             | SNP | 37 |
| 6 | SRCIN1       | uc002hqd.3 | Silent            | SNP | 37 |
| 6 | PTGIR        | uc002pex.3 | Missense_Mutation | SNP | 37 |
| 6 | CTNND2       | uc003jfa.1 | Silent            | SNP | 37 |
| 6 | GNPDA2       | uc003gwy.3 | Nonsense_Mutation | SNP | 37 |
| 6 | LOC100132146 | uc003cpw.1 | 3'UTR             | SNP | 37 |
| 6 | MYH13        | uc002gmk.1 | Missense_Mutation | SNP | 37 |
| 6 | ST18         | uc003xqz.2 | Missense_Mutation | SNP | 37 |
| 6 | CADM1        | uc001ppj.4 | Silent            | SNP | 37 |
| 6 | NPHP3        | uc003epe.2 | Silent            | SNP | 37 |
| 6 | SLC5A8       | uc001thz.4 | Missense_Mutation | SNP | 37 |
| 6 | CEACAM1      | uc002oua.3 | 3'UTR             | SNP | 37 |
| 6 | GLRA2        | uc010neq.3 | Missense_Mutation | SNP | 37 |
| 6 | RFPL2        | uc003amg.3 | Silent            | SNP | 37 |
| 6 | MUC16        | uc002mkp.3 | Missense_Mutation | SNP | 37 |
| 6 | KIAA2022     | uc004eby.3 | Missense_Mutation | SNP | 37 |
| 6 | NCAM1        | uc021qqp.1 | Splice_Site       | SNP | 37 |
| 6 | TPGS1        | uc002lou.3 | Silent            | SNP | 37 |
| 6 | GRB14        | uc002ucl.3 | Silent            | SNP | 37 |
| 6 | HHLA1        | uc011liy.1 | Missense_Mutation | SNP | 37 |
| 6 | CDK14        | uc003uky.2 | Missense_Mutation | SNP | 37 |
| 6 | GALNTL2      | uc003car.4 | Missense_Mutation | SNP | 37 |
| 6 | PRSS3P2      | uc011ksq.2 | 5'UTR             | SNP | 37 |
| 6 | KIAA1244     | uc003qhu.3 | Missense_Mutation | SNP | 37 |
| 6 | CYFIP1       | uc001yus.3 | Missense_Mutation | SNP | 37 |
| 6 | DCDC5        | uc009yjk.1 | Silent            | SNP | 37 |
| 6 | DGKK         | uc010njr.2 | Missense_Mutation | SNP | 37 |
| 6 | SSPO         | uc010lpk.3 | Missense_Mutation | SNP | 37 |
| 6 | SLC35G3      | uc002hjd.2 | Missense_Mutation | SNP | 37 |
| 6 | ASIC4        | uc002vlz.3 | Missense_Mutation | SNP | 37 |
| 6 | FAM55D       | uc001ppc.3 | Nonsense_Mutation | SNP | 37 |
| 6 | PACSIN3      | uc001ndw.3 | Silent            | SNP | 37 |
| 6 | EXOC3L2      | uc002pay.1 | Missense_Mutation | SNP | 37 |
| 6 | DNAH11       | uc003svc.3 | Missense_Mutation | SNP | 37 |
| 6 | SYT14        | uc001hhs.4 | 3'UTR             | SNP | 37 |
| 6 | ZNF598       | uc002cof.1 | Missense_Mutation | SNP | 37 |
| 6 | NIPAL2       | uc003yim.1 | Silent            | SNP | 37 |
| 6 | B3GNT5       | uc003flk.3 | Missense_Mutation | SNP | 37 |
| 6 | NCF4         | uc003apy.4 | Missense_Mutation | SNP | 37 |
| 6 | ODF1         | uc003ykt.2 | Silent            | SNP | 37 |

|   |              |            |                       |     |    |
|---|--------------|------------|-----------------------|-----|----|
| 6 | TFPI         | uc002upy.3 | Missense_Mutation     | SNP | 37 |
| 6 | ZNF131       | uc011cpw.2 | Missense_Mutation     | SNP | 37 |
| 6 | CR1          | uc001hfx.3 | Silent                | SNP | 37 |
| 6 | ANKRD18A     | uc004abg.4 | Missense_Mutation     | SNP | 37 |
| 6 | A4GNT        | uc003ers.2 | Missense_Mutation     | SNP | 37 |
| 6 | NPAS3        | uc001wru.3 | Silent                | SNP | 37 |
| 6 | UGT2B15      | uc021xow.1 | Missense_Mutation     | SNP | 37 |
| 6 | C1orf129     | uc010plz.2 | Silent                | SNP | 37 |
| 6 | CCDC85A      | uc002rzn.3 | Silent                | SNP | 37 |
| 6 | OR5P3        | uc010rbg.2 | Silent                | SNP | 37 |
| 6 | FES          | uc002bvp.3 | Silent                | SNP | 37 |
| 6 | SERPINA1     | uc001ycx.4 | 3'UTR                 | SNP | 37 |
| 6 | OR4E2        | uc010tmd.2 | Silent                | SNP | 37 |
| 6 | BC133032     | uc001hyk.1 | Non-coding_Transcript | SNP | 37 |
| 6 | FAM50B       | uc003mvu.3 | Missense_Mutation     | SNP | 37 |
| 6 | TRBV5-5      | uc010lnw.1 | Silent                | SNP | 37 |
| 6 | CACNA1F      | uc004dnb.3 | Nonsense_Mutation     | SNP | 37 |
| 6 | GLT8D2       | uc001tkh.1 | Missense_Mutation     | SNP | 37 |
| 6 | OR2L2        | uc001idw.3 | Missense_Mutation     | SNP | 37 |
| 6 | JUP          | uc010wfs.2 | Missense_Mutation     | SNP | 37 |
| 6 | DSCR4        | uc002ywp.3 | 3'UTR                 | SNP | 37 |
| 6 | NACAD        | uc003tmt.3 | Missense_Mutation     | SNP | 37 |
| 6 | ANKRD11      | uc002fmx.1 | 5'UTR                 | SNP | 37 |
| 6 | EVPL         | uc010wss.1 | Missense_Mutation     | SNP | 37 |
| 6 | CYP7B1       | uc003xvj.2 | Missense_Mutation     | SNP | 37 |
| 6 | PSTPIP1      | uc002bcf.2 | Silent                | SNP | 37 |
| 6 | PDZRN4       | uc010skn.2 | Missense_Mutation     | SNP | 37 |
| 6 | CCDC40       | uc002jxn.4 | 5'UTR                 | SNP | 37 |
| 6 | SLITRK1      | uc001vlk.3 | Missense_Mutation     | SNP | 37 |
| 6 | CSPG5        | uc003crp.4 | Missense_Mutation     | SNP | 37 |
| 6 | SLA          | uc010mdz.1 | 3'UTR                 | SNP | 37 |
| 6 | DYNLRB1      | uc010zuk.2 | Intron                | SNP | 37 |
| 6 | HSD3B2       | uc001ehs.3 | Missense_Mutation     | SNP | 37 |
| 6 | CPNE2        | uc002ekt.1 | 3'UTR                 | SNP | 37 |
| 6 | CACNA2D3     | uc003dhf.3 | Missense_Mutation     | SNP | 37 |
| 6 | PSD3         | uc003wyx.4 | Missense_Mutation     | SNP | 37 |
| 6 | CACNA1E      | uc009wxt.3 | Missense_Mutation     | SNP | 37 |
| 6 | IKBKB        | uc003xow.2 | 3'UTR                 | SNP | 37 |
| 6 | SNX4         | uc003eib.3 | Missense_Mutation     | SNP | 37 |
| 6 | MRPS7        | uc002jnm.4 | 5'UTR                 | SNP | 37 |
| 6 | SPINK5       | uc003loy.2 | Splice_Site           | SNP | 37 |
| 6 | PRR5-ARHGAP8 | uc003bfd.3 | Silent                | SNP | 37 |
| 6 | INPP5D       | uc010zmo.2 | Silent                | SNP | 37 |

|   |          |            |                       |     |    |
|---|----------|------------|-----------------------|-----|----|
| 6 | CEACAM20 | uc010ejn.1 | Missense_Mutation     | SNP | 37 |
| 6 | FLJ43315 | uc003boa.3 | Non-coding_Transcript | SNP | 37 |
| 6 | KRTAP5-4 | uc009ycy.1 | Missense_Mutation     | SNP | 37 |
| 6 | ELMOD1   | uc010rvs.2 | Missense_Mutation     | SNP | 37 |
| 6 | SLC22A25 | uc001nwr.1 | Silent                | SNP | 37 |
| 6 | HS3ST3B1 | uc002goh.1 | Silent                | SNP | 37 |
| 6 | TRDN     | uc003pzj.2 | Missense_Mutation     | SNP | 37 |
| 6 | CPSF3    | uc002qzo.1 | Silent                | SNP | 37 |
| 6 | MAN1B1   | uc004clc.2 | Missense_Mutation     | SNP | 37 |
| 6 | WDR90    | uc002cih.1 | Missense_Mutation     | SNP | 37 |
| 6 | CACNA1B  | uc004cog.3 | Intron                | SNP | 37 |
| 6 | CCDC87   | uc001oiq.4 | Nonsense_Mutation     | SNP | 37 |
| 6 | COL10A1  | uc003pwm.3 | Missense_Mutation     | SNP | 37 |
| 6 | ALDOA    | uc010veg.2 | Missense_Mutation     | SNP | 37 |
| 6 | ADCK1    | uc001xui.3 | Missense_Mutation     | SNP | 37 |
| 6 | CYB5B    | uc002exg.1 | Splice_Site           | SNP | 37 |
| 6 | DNAH12   | uc003dit.2 | Missense_Mutation     | SNP | 37 |
| 6 | GRIP2    | uc021wtn.1 | Missense_Mutation     | SNP | 37 |
| 6 | HBS1L    | uc003qez.2 | Nonsense_Mutation     | SNP | 37 |
| 6 | ADAMTS18 | uc002ffc.4 | Missense_Mutation     | SNP | 37 |
| 6 | RP1      | uc003xsd.1 | Missense_Mutation     | SNP | 37 |
| 6 | GPR17    | uc010yzn.2 | Silent                | SNP | 37 |
| 6 | HLA-DRB5 | uc003obp.4 | Missense_Mutation     | SNP | 37 |
| 6 | PCDHB4   | uc003lip.1 | Missense_Mutation     | SNP | 37 |
| 6 | OR4K5    | uc010tkw.2 | Silent                | SNP | 37 |
| 6 | HERC2P3  | uc001ytg.3 | Silent                | SNP | 37 |
| 6 | EXOC3L2  | uc002pay.1 | Missense_Mutation     | SNP | 37 |
| 6 | SWAP70   | uc001mhw.3 | 3'UTR                 | SNP | 37 |
| 6 | FLCN     | uc002grb.4 | Missense_Mutation     | SNP | 37 |
| 6 | ZNF416   | uc002qpf.3 | Silent                | SNP | 37 |
| 6 | PCDHAC2  | uc003lhb.2 | Silent                | SNP | 37 |
| 6 | MUTYH    | uc009vxp.3 | Missense_Mutation     | SNP | 37 |
| 6 | CADPS2   | uc022akp.1 | Missense_Mutation     | SNP | 37 |
| 6 | THBS3    | uc001fix.3 | Missense_Mutation     | SNP | 37 |
| 6 | ABHD11   | uc003tzb.3 | Splice_Site           | SNP | 37 |
| 6 | VPS52    | uc003odm.1 | Silent                | SNP | 37 |
| 6 | UGT3A2   | uc003jjz.2 | Silent                | SNP | 37 |
| 6 | FREM2    | uc001uwv.3 | Missense_Mutation     | SNP | 37 |
| 6 | COL13A1  | uc001jqj.3 | Nonsense_Mutation     | SNP | 37 |
| 6 | OR11G2   | uc010tlb.2 | Silent                | SNP | 37 |
| 6 | DLK1     | uc001yhs.4 | Missense_Mutation     | SNP | 37 |
| 6 | ZNF662   | uc003cmk.2 | Silent                | SNP | 37 |
| 6 | ZC3H6    | uc002thq.1 | Missense_Mutation     | SNP | 37 |

|   |          |            |                       |     |    |
|---|----------|------------|-----------------------|-----|----|
| 6 | TIFAB    | uc003law.4 | Missense_Mutation     | SNP | 37 |
| 6 | TPK1     | uc003weq.3 | Silent                | SNP | 37 |
| 6 | GALNS    | uc010cid.3 | Missense_Mutation     | SNP | 37 |
| 6 | SH3RF2   | uc011dbl.1 | 3'UTR                 | SNP | 37 |
| 6 | PSMD13   | uc001loo.2 | 5'UTR                 | SNP | 37 |
| 6 | ABCC9    | uc001rfh.3 | Missense_Mutation     | SNP | 37 |
| 6 | DCDC5    | uc001msu.2 | Missense_Mutation     | SNP | 37 |
| 6 | GBP5     | uc001dnc.3 | Silent                | SNP | 37 |
| 6 | RAE1     | uc010git.1 | Missense_Mutation     | SNP | 37 |
| 6 | RAE1     | uc010git.1 | Missense_Mutation     | SNP | 37 |
| 6 | OPRK1    | uc003xrh.1 | Missense_Mutation     | SNP | 37 |
| 6 | TTN      | uc021vsy.1 | Silent                | SNP | 37 |
| 6 | LIPE     | uc002otr.3 | Intron                | SNP | 37 |
| 6 | C5orf4   | uc003lvs.4 | Silent                | SNP | 37 |
| 6 | RHPN2    | uc002nuf.3 | Missense_Mutation     | SNP | 37 |
| 6 | ZNF701   | uc010ydn.2 | Nonsense_Mutation     | SNP | 37 |
| 6 | LRRC4C   | uc001mx.1  | Silent                | SNP | 37 |
| 6 | RC3H1    | uc010pmt.2 | Missense_Mutation     | SNP | 37 |
| 6 | WNT10A   | uc002vjd.1 | Missense_Mutation     | SNP | 37 |
| 6 | TTN      | uc021vsy.1 | Missense_Mutation     | SNP | 37 |
| 6 | FBXO40   | uc003eeg.2 | Silent                | SNP | 37 |
| 6 | APC      | uc003kpz.4 | Missense_Mutation     | SNP | 37 |
| 6 | ALDH1B1  | uc004aay.3 | Missense_Mutation     | SNP | 37 |
| 6 | IFT43    | uc001xsg.2 | Missense_Mutation     | SNP | 37 |
| 6 | BIRC6    | uc010ezu.3 | Missense_Mutation     | SNP | 37 |
| 6 | ACER1    | uc002mel.2 | Silent                | SNP | 37 |
| 6 | PPP1R21  | uc002rwm.3 | Missense_Mutation     | SNP | 37 |
| 6 | C1orf222 | uc001aik.3 | 5'UTR                 | SNP | 37 |
| 6 | ACAT2    | uc011efw.2 | 5'UTR                 | SNP | 37 |
| 6 | abParts  | uc021ser.1 | Non-coding_Transcript | SNP | 37 |
| 6 | BACE1    | uc001pqz.3 | Missense_Mutation     | SNP | 37 |
| 6 | TMEM206  | uc010pte.2 | Silent                | SNP | 37 |
| 6 | PIEZO2   | uc002kos.2 | Silent                | SNP | 37 |
| 6 | CELSR1   | uc003bhw.1 | Silent                | SNP | 37 |
| 6 | RALGDS   | uc011mcw.2 | Missense_Mutation     | SNP | 37 |
| 6 | IGF1R    | uc002bul.3 | Silent                | SNP | 37 |
| 6 | SLC22A25 | uc001nwr.1 | Missense_Mutation     | SNP | 37 |
| 6 | SLC25A37 | uc003xdn.1 | 3'UTR                 | SNP | 37 |
| 6 | OR2T4    | uc001ieh.1 | Missense_Mutation     | SNP | 37 |
| 6 | PCDHGC5  | uc003lju.2 | Silent                | SNP | 37 |
| 6 | CD5L     | uc001frk.4 | Silent                | SNP | 37 |
| 6 | NCAN     | uc002nlz.3 | Missense_Mutation     | SNP | 37 |
| 6 | TRNT1    | uc003bpp.4 | Missense_Mutation     | SNP | 37 |

|   |            |            |                       |     |    |
|---|------------|------------|-----------------------|-----|----|
| 6 | PRPSAP1    | uc010wta.1 | Missense_Mutation     | SNP | 37 |
| 6 | TTLL4      | uc002viy.3 | Missense_Mutation     | SNP | 37 |
| 6 | HS3ST4     | uc002dof.3 | Silent                | SNP | 37 |
| 6 | CBFB       | uc002erb.3 | Nonsense_Mutation     | SNP | 37 |
| 6 | OR2A1      | uc011kud.2 | Missense_Mutation     | SNP | 37 |
| 6 | CNTN6      | uc010hbo.2 | Missense_Mutation     | SNP | 37 |
| 6 | OR2A2      | uc011ktz.2 | Missense_Mutation     | SNP | 37 |
| 6 | AK310665   | uc010cqz.3 | Non-coding_Transcript | SNP | 37 |
| 6 | OR4A5      | uc001nhi.2 | Missense_Mutation     | SNP | 37 |
| 6 | LRRN2      | uc001hbe.1 | Silent                | SNP | 37 |
| 6 | CMC2       | uc002ffu.3 | Intron                | SNP | 37 |
| 6 | OCSTAMP    | uc010zxu.1 | 3'UTR                 | SNP | 37 |
| 6 | CPNE8      | uc001rls.1 | Missense_Mutation     | SNP | 37 |
| 6 | SCN11A     | uc021wvy.1 | Silent                | SNP | 37 |
| 6 | DHX40      | uc002ixn.2 | Silent                | SNP | 37 |
| 6 | C16orf86   | uc002etx.1 | Missense_Mutation     | SNP | 37 |
| 6 | ATXN7L1    | uc003vde.2 | Missense_Mutation     | SNP | 37 |
| 6 | C7         | uc003jmh.3 | Silent                | SNP | 37 |
| 6 | ATP6V0A4   | uc003vuf.3 | Missense_Mutation     | SNP | 37 |
| 6 | LINGO2     | uc010mjf.1 | Missense_Mutation     | SNP | 37 |
| 6 | NPHS1      | uc002oby.3 | Silent                | SNP | 37 |
| 6 | NBAS       | uc002rcc.1 | Missense_Mutation     | SNP | 37 |
| 6 | RASSF6     | uc003hhd.1 | Silent                | SNP | 37 |
| 6 | ZNF99      | uc021urt.1 | 3'UTR                 | SNP | 37 |
| 6 | DCC        | uc002lfe.2 | Silent                | SNP | 37 |
| 6 | BV13S6J2.1 | uc011krx.2 | Missense_Mutation     | SNP | 37 |
| 6 | FOXRED2    | uc003apn.4 | Silent                | SNP | 37 |
| 6 | CCDC68     | uc002lfs.3 | Missense_Mutation     | SNP | 37 |
| 6 | PSPN       | uc010xja.2 | Missense_Mutation     | SNP | 37 |
| 6 | QSOX1      | uc001gnz.3 | Missense_Mutation     | SNP | 37 |
| 6 | UNC13C     | uc021sms.1 | Silent                | SNP | 37 |
| 6 | abParts    | uc021wmm.1 | Intron                | SNP | 37 |
| 6 | TCRA       | uc001wbz.1 | Missense_Mutation     | SNP | 37 |
| 6 | AK302306   | uc010uaf.1 | Silent                | SNP | 37 |
| 6 | TTN        | uc021vsy.1 | Silent                | SNP | 37 |
| 6 | PCDHGC5    | uc003ljm.2 | Missense_Mutation     | SNP | 37 |
| 6 | HOXA2      | uc003syh.3 | 3'UTR                 | SNP | 37 |
| 6 | MAP3K5     | uc003qhc.3 | Missense_Mutation     | SNP | 37 |
| 6 | IL17RD     | uc003dil.3 | Missense_Mutation     | SNP | 37 |
| 6 | DOCK8      | uc010mgu.3 | 5'UTR                 | SNP | 37 |
| 6 | ATP13A4    | uc003ftf.4 | 3'UTR                 | SNP | 37 |
| 6 | OPN4       | uc010qmk.1 | Missense_Mutation     | SNP | 37 |
| 6 | XPO7       | uc003xaa.4 | Silent                | SNP | 37 |

|   |          |            |                   |     |    |
|---|----------|------------|-------------------|-----|----|
| 6 | PLCXD2   | uc003dya.3 | Silent            | SNP | 37 |
| 6 | CRYBG3   | uc003drx.3 | 3'UTR             | SNP | 37 |
| 6 | FLNA     | uc004fkk.2 | Missense_Mutation | SNP | 37 |
| 6 | FCGR1A   | uc001esp.4 | Missense_Mutation | SNP | 37 |
| 6 | SLC35D3  | uc003qhe.3 | Missense_Mutation | SNP | 37 |
| 6 | PSMG2    | uc002krk.3 | Missense_Mutation | SNP | 37 |
| 6 | ALOX5    | uc001jce.3 | Silent            | SNP | 37 |
| 6 | LAMB3    | uc001hhg.3 | Missense_Mutation | SNP | 37 |
| 6 | PIK3R6   | uc002glq.1 | 3'UTR             | SNP | 37 |
| 6 | OR51L1   | uc010qyu.2 | Silent            | SNP | 37 |
| 6 | OAS3     | uc001tuf.3 | 3'UTR             | SNP | 37 |
| 6 | TCRBV3S1 | uc011ksk.1 | Nonsense_Mutation | SNP | 37 |
| 6 | HPS5     | uc001mod.1 | Silent            | SNP | 37 |
| 6 | C20orf72 | uc002wqh.3 | Silent            | SNP | 37 |
| 6 | THSD7B   | uc002tva.1 | Silent            | SNP | 37 |
| 6 | ZPLD1    | uc003dvt.1 | 5'UTR             | SNP | 37 |
| 6 | WNT11    | uc001oxe.3 | Missense_Mutation | SNP | 37 |
| 6 | ENPEP    | uc003iab.4 | Nonsense_Mutation | SNP | 37 |
| 6 | FAM132A  | uc001adl.2 | Silent            | SNP | 37 |
| 6 | SLC11A1  | uc002vhv.3 | Missense_Mutation | SNP | 37 |
| 6 | CAPN14   | uc010yms.2 | Splice_Site       | SNP | 37 |
| 6 | EPG5     | uc002lbn.3 | Missense_Mutation | SNP | 37 |
| 6 | PTK2B    | uc003xfn.2 | Missense_Mutation | SNP | 37 |
| 6 | ALPK2    | uc002lhj.4 | Silent            | SNP | 37 |
| 6 | THRB     | uc003ccz.4 | Silent            | SNP | 37 |
| 6 | KERA     | uc001tbl.3 | Silent            | SNP | 37 |
| 6 | ATP5D    | uc002lrn.3 | 5'UTR             | SNP | 37 |
| 6 | ZNF599   | uc010edn.1 | Silent            | SNP | 37 |
| 6 | PIGL     | uc002gpv.3 | Nonsense_Mutation | SNP | 37 |
| 6 | CCDC166  | uc011lkr.2 | Missense_Mutation | SNP | 37 |
| 6 | TMCO1    | uc001gdj.4 | Missense_Mutation | SNP | 37 |
| 6 | HSPB8    | uc001txb.3 | Missense_Mutation | SNP | 37 |
| 6 | ARFRP1   | uc002yga.3 | 5'UTR             | SNP | 37 |
| 6 | GSDMD    | uc003yyf.3 | Silent            | SNP | 37 |
| 6 | PDCD1LG2 | uc011lmc.2 | Missense_Mutation | SNP | 37 |
| 6 | GABRG1   | uc003gxb.3 | Missense_Mutation | SNP | 37 |
| 6 | ALDH3A1  | uc002gwk.3 | Silent            | SNP | 37 |
| 6 | DNAH5    | uc003jfd.2 | Silent            | SNP | 37 |
| 6 | RPS6KB2  | uc001old.3 | Silent            | SNP | 37 |
| 6 | GPR98    | uc003kju.3 | Missense_Mutation | SNP | 37 |
| 6 | OR52K2   | uc001lyz.2 | Silent            | SNP | 37 |
| 6 | SCN10A   | uc003ciq.3 | Missense_Mutation | SNP | 37 |
| 6 | SIRT6    | uc002lzo.3 | Silent            | SNP | 37 |

|   |            |            |                   |     |    |
|---|------------|------------|-------------------|-----|----|
| 6 | ALOX12B    | uc002ggy.1 | Intron            | SNP | 37 |
| 6 | KIF13B     | uc003xhh.4 | Silent            | SNP | 37 |
| 6 | NALCN      | uc001voz.2 | Silent            | SNP | 37 |
| 6 | GPR98      | uc003kju.3 | Silent            | SNP | 37 |
| 6 | PCDHGC5    | uc003lkq.2 | Missense_Mutation | SNP | 37 |
| 6 | MUC6       | uc001lsw.2 | Missense_Mutation | SNP | 37 |
| 6 | SLC13A1    | uc010lks.3 | Silent            | SNP | 37 |
| 6 | FSIP2      | uc002upl.3 | Silent            | SNP | 37 |
| 6 | AQP7       | uc011loa.1 | Missense_Mutation | SNP | 37 |
| 6 | APLP2      | uc021qsg.1 | Missense_Mutation | SNP | 37 |
| 6 | DYM        | uc002ldi.1 | Silent            | SNP | 37 |
| 6 | TPRG1      | uc003frv.2 | Silent            | SNP | 37 |
| 6 | PRKD3      | uc002rqd.3 | Silent            | SNP | 37 |
| 6 | CAMK2A     | uc003lrt.2 | Silent            | SNP | 37 |
| 6 | PRSS1      | uc011ksm.1 | Silent            | SNP | 37 |
| 6 | BAG6       | uc003nvg.4 | Missense_Mutation | SNP | 37 |
| 6 | JA040725   | uc022bqs.1 | Intron            | SNP | 37 |
| 6 | NAT10      | uc001mvk.3 | Silent            | SNP | 37 |
| 6 | FRAS1      | uc003hlb.2 | Silent            | SNP | 37 |
| 6 | FNDC1      | uc010kqv.3 | Missense_Mutation | SNP | 37 |
| 6 | BFSP2      | uc003epn.1 | Silent            | SNP | 37 |
| 6 | OR2M7      | uc010pzk.2 | Missense_Mutation | SNP | 37 |
| 6 | TAAR9      | uc011eci.2 | Missense_Mutation | SNP | 37 |
| 6 | PHRF1      | uc001lqe.3 | Silent            | SNP | 37 |
| 6 | RPL23      | uc002hqx.1 | Missense_Mutation | SNP | 37 |
| 6 | TRPM2      | uc010gpt.1 | Missense_Mutation | SNP | 37 |
| 6 | NACA       | uc021qze.1 | Missense_Mutation | SNP | 37 |
| 6 | LOC641515  | uc021php.1 | Missense_Mutation | SNP | 37 |
| 6 | MAD1L1     | uc010ksi.1 | 3'UTR             | SNP | 37 |
| 6 | HIST3H2A   | uc001hsy.3 | Silent            | SNP | 37 |
| 6 | BIVM-ERCC5 | uc001vpu.2 | Missense_Mutation | SNP | 37 |
| 6 | C19orf45   | uc010xjo.1 | 3'UTR             | SNP | 37 |
| 6 | RDH8       | uc002mmr.3 | Silent            | SNP | 37 |
| 6 | ROBO1      | uc003dqe.2 | Silent            | SNP | 37 |
| 6 | FAM135B    | uc003yvb.3 | Missense_Mutation | SNP | 37 |
| 6 | GRB10      | uc003tpi.2 | Missense_Mutation | SNP | 37 |
| 6 | DDX43      | uc003pgw.3 | Missense_Mutation | SNP | 37 |
| 6 | MUC16      | uc002mkp.3 | Missense_Mutation | SNP | 37 |
| 6 | UBR2       | uc011dur.2 | Missense_Mutation | SNP | 37 |
| 6 | RTN1       | uc001xen.1 | Missense_Mutation | SNP | 37 |
| 6 | ZNF441     | uc010dyj.3 | Missense_Mutation | SNP | 37 |
| 6 | PTPRN2     | uc011kwa.2 | Missense_Mutation | SNP | 37 |
| 6 | USF1       | uc001fxi.3 | Missense_Mutation | SNP | 37 |



|   |              |            |                   |     |    |
|---|--------------|------------|-------------------|-----|----|
| 6 | COL15A1      | uc004azb.1 | Missense_Mutation | SNP | 37 |
| 6 | KIAA1875     | uc011lkz.1 | 5'UTR             | SNP | 37 |
| 6 | GSS          | uc002xbg.3 | Missense_Mutation | SNP | 37 |
| 6 | FAT3         | uc001pdj.4 | Nonsense_Mutation | SNP | 37 |
| 6 | CACNA2D1     | uc003uhr.1 | 5'UTR             | SNP | 37 |
| 6 | PPP3CB       | uc001juf.3 | Missense_Mutation | SNP | 37 |
| 6 | NOA1         | uc003hck.3 | 5'UTR             | SNP | 37 |
| 6 | C9orf43      | uc004bho.4 | Silent            | SNP | 37 |
| 6 | TMEM132D     | uc009zyl.1 | Missense_Mutation | SNP | 37 |
| 6 | SAP30        | uc003itd.3 | Missense_Mutation | SNP | 37 |
| 6 | LOC401010    | uc002tst.2 | Missense_Mutation | SNP | 37 |
| 6 | ECEL1        | uc002vsv.2 | Silent            | SNP | 37 |
| 6 | SUSD5        | uc003cfo.1 | Missense_Mutation | SNP | 37 |
| 6 | CBLN3        | uc001wpg.4 | Missense_Mutation | SNP | 37 |
| 6 | ACSM2B       | uc002dhj.4 | Missense_Mutation | SNP | 37 |
| 6 | RORC         | uc010pdo.2 | Silent            | SNP | 37 |
| 6 | IL1RL2       | uc002tbs.3 | Missense_Mutation | SNP | 37 |
| 6 | LOC100272216 | uc003jxe.2 | 3'UTR             | SNP | 37 |
| 6 | LTBP2        | uc001xqa.3 | Missense_Mutation | SNP | 37 |
| 6 | PCDHAC2      | uc003lii.3 | Missense_Mutation | SNP | 37 |
| 6 | CD163L1      | uc010sge.2 | Missense_Mutation | SNP | 37 |
| 6 | PITPNM1      | uc001olx.3 | Silent            | SNP | 37 |
| 6 | LTB4R2       | uc010alo.3 | Silent            | SNP | 37 |
| 6 | CACNA1G      | uc002irk.1 | Missense_Mutation | SNP | 37 |
| 6 | PDGFB        | uc003axf.3 | Silent            | SNP | 37 |
| 6 | CYP11B1      | uc003yxh.3 | 5'UTR             | SNP | 37 |
| 6 | TPTE2P1      | uc010tdh.2 | 3'UTR             | SNP | 37 |
| 6 | IDUA         | uc003gca.3 | Missense_Mutation | SNP | 37 |
| 6 | FLAD1        | uc001fgf.2 | Silent            | SNP | 37 |
| 6 | LRRC28       | uc002bva.1 | Splice_Site       | SNP | 37 |
| 6 | DNAJC1       | uc001irc.3 | Missense_Mutation | SNP | 37 |
| 6 | COL25A1      | uc021xqo.1 | Missense_Mutation | SNP | 37 |
| 6 | KIF23        | uc002asb.3 | Missense_Mutation | SNP | 37 |
| 6 | ARRB2        | uc010vsg.2 | 3'UTR             | SNP | 37 |
| 6 | SRRM2        | uc002crk.3 | Missense_Mutation | SNP | 37 |
| 6 | SLC9A1       | uc001bnm.3 | Missense_Mutation | SNP | 37 |
| 6 | VPS53        | uc010cjo.2 | 5'UTR             | SNP | 37 |
| 6 | USP7         | uc010uyj.1 | 5'UTR             | SNP | 37 |
| 6 | SPATA18      | uc003gzl.3 | Missense_Mutation | SNP | 37 |
| 6 | AIM2         | uc001ftj.1 | Splice_Site       | SNP | 37 |
| 6 | TLE4         | uc004ald.3 | Silent            | SNP | 37 |
| 6 | MLIP         | uc011dxa.2 | Silent            | SNP | 37 |
| 6 | RYR2         | uc001hyl.1 | Missense_Mutation | SNP | 37 |

|   |          |            |                   |     |    |
|---|----------|------------|-------------------|-----|----|
| 6 | LSR      | uc002nyl.3 | Silent            | SNP | 37 |
| 6 | HS6ST3   | uc001vmw.3 | Missense_Mutation | SNP | 37 |
| 6 | C20orf79 | uc002wrk.3 | Silent            | SNP | 37 |
| 6 | WBSCR16  | uc003ubr.3 | Missense_Mutation | SNP | 37 |
| 6 | MYH7     | uc001wjx.3 | Silent            | SNP | 37 |
| 6 | PRC1     | uc002bqm.3 | Silent            | SNP | 37 |
| 6 | STEAP4   | uc022agz.1 | Missense_Mutation | SNP | 37 |
| 6 | TINAG    | uc003pcj.2 | Missense_Mutation | SNP | 37 |
| 6 | COL5A2   | uc002uqk.3 | Missense_Mutation | SNP | 37 |
| 6 | CNOT3    | uc002qdj.2 | Silent            | SNP | 37 |
| 6 | PDE4DIP  | uc021ouh.1 | Missense_Mutation | SNP | 37 |
| 6 | EZH2     | uc003wfb.2 | Nonsense_Mutation | SNP | 37 |
| 6 | PDE8B    | uc003kfa.3 | Missense_Mutation | SNP | 37 |
| 6 | FAM194A  | uc003eyg.3 | Missense_Mutation | SNP | 37 |
| 6 | DNAH5    | uc003jfd.2 | Missense_Mutation | SNP | 37 |
| 6 | SSPO     | uc010lpk.3 | Missense_Mutation | SNP | 37 |
| 6 | GABRB3   | uc001zbb.3 | Intron            | SNP | 37 |
| 6 | LCE1B    | uc001faq.3 | Missense_Mutation | SNP | 37 |
| 6 | LAMC3    | uc004caa.1 | Missense_Mutation | SNP | 37 |
| 6 | SEC22B   | uc001eml.1 | Silent            | SNP | 37 |
| 6 | MYBPC2   | uc002psf.2 | Silent            | SNP | 37 |
| 6 | SNPH     | uc002wet.3 | Missense_Mutation | SNP | 37 |
| 6 | DDX39A   | uc010xnp.2 | Nonsense_Mutation | SNP | 37 |
| 6 | RPL18    | uc010xzs.1 | Missense_Mutation | SNP | 37 |
| 6 | PXDNL    | uc003xqu.4 | Missense_Mutation | SNP | 37 |
| 6 | PSG9     | uc002owd.4 | Missense_Mutation | SNP | 37 |
| 6 | ZGLP1    | uc002mnw.4 | 3'UTR             | SNP | 37 |
| 6 | FAM116B  | uc011arv.1 | Missense_Mutation | SNP | 37 |
| 6 | ADC      | uc009vug.3 | Missense_Mutation | SNP | 37 |
| 6 | C16orf86 | uc002etx.1 | Nonsense_Mutation | SNP | 37 |
| 6 | FAM71C   | uc001tgn.3 | 5'UTR             | SNP | 37 |
| 6 | EPHB2    | uc009vqj.1 | Silent            | SNP | 37 |
| 6 | APLP1    | uc002ocf.3 | Silent            | SNP | 37 |
| 6 | THBS2    | uc003qwt.3 | Nonsense_Mutation | SNP | 37 |
| 6 | AQP3     | uc010mju.3 | Missense_Mutation | SNP | 37 |
| 6 | RALGAPA1 | uc001wtk.1 | Missense_Mutation | SNP | 37 |
| 6 | CPXM1    | uc002wgu.3 | Missense_Mutation | SNP | 37 |
| 6 | TRHDE    | uc001sxa.3 | Missense_Mutation | SNP | 37 |
| 6 | CCDC50   | uc003fsv.3 | Missense_Mutation | SNP | 37 |
| 6 | FOXN1    | uc010crm.3 | Silent            | SNP | 37 |
| 6 | OR5H14   | uc003dsg.1 | Missense_Mutation | SNP | 37 |
| 6 | SNRPD2   | uc002pcw.3 | 5'UTR             | SNP | 37 |
| 6 | OR8G2    | uc010saf.2 | Silent            | SNP | 37 |

|   |             |            |                   |     |    |
|---|-------------|------------|-------------------|-----|----|
| 6 | MYH2        | uc010coi.3 | Splice_Site       | SNP | 37 |
| 6 | USP2        | uc001pwn.4 | Nonsense_Mutation | SNP | 37 |
| 6 | RAVER1      | uc002moa.3 | Silent            | SNP | 37 |
| 6 | C10orf120   | uc001lgn.3 | Missense_Mutation | SNP | 37 |
| 6 | FLT3LG      | uc010yav.2 | 3'UTR             | SNP | 37 |
| 6 | HOXC10      | uc001sen.3 | Silent            | SNP | 37 |
| 6 | MICAL3      | uc002zng.4 | 3'UTR             | SNP | 37 |
| 6 | LOC285768   | uc011dhp.2 | 5'Flank           | SNP | 37 |
| 6 | GINS4       | uc003xnx.3 | Splice_Site       | SNP | 37 |
| 6 | SIGLEC10    | uc010eow.3 | Missense_Mutation | SNP | 37 |
| 6 | SETDB2      | uc001vcz.3 | Missense_Mutation | SNP | 37 |
| 6 | OR7E24      | uc002mlb.1 | Missense_Mutation | SNP | 37 |
| 6 | PDIA6       | uc002raw.3 | Missense_Mutation | SNP | 37 |
| 6 | RASA3       | uc001vui.3 | Splice_Site       | SNP | 37 |
| 6 | GPR113      | uc010yky.1 | 5'UTR             | SNP | 37 |
| 6 | TAOK2       | uc002dvc.2 | Missense_Mutation | SNP | 37 |
| 6 | FAM178A     | uc001krs.3 | Missense_Mutation | SNP | 37 |
| 6 | TMEM200A    | uc003qca.3 | Missense_Mutation | SNP | 37 |
| 6 | ZC3H12D     | uc010kid.3 | Silent            | SNP | 37 |
| 6 | PIP5KL1     | uc011mao.2 | Missense_Mutation | SNP | 37 |
| 6 | WDR46       | uc003ods.3 | Missense_Mutation | SNP | 37 |
| 6 | LILRB4      | uc010ert.3 | Missense_Mutation | SNP | 37 |
| 6 | ANO4        | uc010svm.1 | Silent            | SNP | 37 |
| 6 | TGM6        | uc002wfy.1 | Silent            | SNP | 37 |
| 6 | RASGRP4     | uc021uub.1 | Missense_Mutation | SNP | 37 |
| 6 | OR5H1       | uc011bgt.2 | Missense_Mutation | SNP | 37 |
| 6 | KHDC1L      | uc003pgm.4 | Missense_Mutation | SNP | 37 |
| 6 | ACTN2       | uc001hyf.2 | Splice_Site       | SNP | 37 |
| 6 | B3GNT7      | uc002vrs.3 | Silent            | SNP | 37 |
| 6 | MTMR10      | uc001zfh.1 | 3'UTR             | SNP | 37 |
| 6 | ACSM1       | uc002dhm.1 | Nonsense_Mutation | SNP | 37 |
| 6 | MDM4        | uc001hba.3 | Missense_Mutation | SNP | 37 |
| 6 | PXDN        | uc002qxa.3 | 3'UTR             | SNP | 37 |
| 6 | TYRO3       | uc001zof.2 | Silent            | SNP | 37 |
| 6 | TRIP10      | uc010dux.2 | Missense_Mutation | SNP | 37 |
| 6 | ZNF445      | uc003cnf.2 | Missense_Mutation | SNP | 37 |
| 6 | ASAP1       | uc003yta.2 | Silent            | SNP | 37 |
| 6 | CR1         | uc001hfx.3 | Missense_Mutation | SNP | 37 |
| 6 | MTUS1       | uc003wxt.3 | 5'UTR             | SNP | 37 |
| 6 | PAX4        | uc010lld.1 | Silent            | SNP | 37 |
| 6 | HEATR7B2    | uc003jnj.4 | Missense_Mutation | SNP | 37 |
| 6 | LILRA4      | uc002qfj.3 | Silent            | SNP | 37 |
| 6 | CORO7-PAM16 | uc002cwi.1 | 3'UTR             | SNP | 37 |

|   |           |            |                       |     |    |
|---|-----------|------------|-----------------------|-----|----|
| 6 | C1orf177  | uc001cyb.4 | 3'UTR                 | SNP | 37 |
| 6 | SCAF8     | uc011efj.2 | Silent                | SNP | 37 |
| 6 | MUC16     | uc002mkp.3 | Nonsense_Mutation     | SNP | 37 |
| 6 | NECAP1    | uc001qtx.2 | Missense_Mutation     | SNP | 37 |
| 6 | LMTK3     | uc002pjk.3 | Missense_Mutation     | SNP | 37 |
| 6 | MYOM1     | uc002klp.3 | Missense_Mutation     | SNP | 37 |
| 6 | LRRC29    | uc010vjg.2 | Missense_Mutation     | SNP | 37 |
| 6 | BROX      | uc001hnq.1 | Silent                | SNP | 37 |
| 6 | LAMP5     | uc002wni.2 | 5'UTR                 | SNP | 37 |
| 6 | TXNDC5    | uc003mxv.3 | Missense_Mutation     | SNP | 37 |
| 6 | PCDHGC5   | uc003ljo.2 | Missense_Mutation     | SNP | 37 |
| 6 | SMG6      | uc002fub.1 | Splice_Site           | SNP | 37 |
| 6 | SNX24     | uc011cwo.2 | 3'UTR                 | SNP | 37 |
| 6 | PPIL2     | uc002zvh.4 | 5'UTR                 | SNP | 37 |
| 6 | TBC1D16   | uc002jxj.3 | Nonsense_Mutation     | SNP | 37 |
| 6 | MYH4      | uc002gmn.3 | Silent                | SNP | 37 |
| 6 | FAM55B    | uc009yyy.2 | Missense_Mutation     | SNP | 37 |
| 6 | DNAH11    | uc003svc.3 | Missense_Mutation     | SNP | 37 |
| 6 | SAP30     | uc003itd.3 | Silent                | SNP | 37 |
| 6 | DEFB118   | uc002wvr.3 | Silent                | SNP | 37 |
| 6 | PTDSS1    | uc003yht.1 | Missense_Mutation     | SNP | 37 |
| 6 | BRCA1     | uc002ict.3 | Missense_Mutation     | SNP | 37 |
| 6 | CENPF     | uc001hkm.3 | Missense_Mutation     | SNP | 37 |
| 6 | C19orf77  | uc010xhk.1 | Missense_Mutation     | SNP | 37 |
| 6 | RPL23AP82 | uc011asd.2 | Non-coding_Transcript | SNP | 37 |
| 6 | PILRB     | uc022ail.1 | 5'Flank               | SNP | 37 |
| 6 | LIN9      | uc001hqa.2 | Silent                | SNP | 37 |
| 6 | NXF5      | uc011mrk.1 | Silent                | SNP | 37 |
| 6 | MLL3      | uc003wla.3 | Missense_Mutation     | SNP | 37 |
| 6 | DCLK2     | uc003ilo.4 | Missense_Mutation     | SNP | 37 |
| 6 | RLIM      | uc004ebu.3 | Missense_Mutation     | SNP | 37 |
| 6 | ST18      | uc003xqz.2 | Missense_Mutation     | SNP | 37 |
| 6 | SH3GL3    | uc002bjj.3 | Missense_Mutation     | SNP | 37 |
| 6 | ARAP3     | uc003llm.3 | Missense_Mutation     | SNP | 37 |
| 6 | SFRP1     | uc003xnt.3 | Intron                | SNP | 37 |
| 6 | CLPB      | uc010rqx.2 | Missense_Mutation     | SNP | 37 |
| 6 | ERMN      | uc002tzh.3 | 5'UTR                 | SNP | 37 |
| 6 | RBM5      | uc003cyg.3 | Splice_Site           | SNP | 37 |
| 6 | KCTD4     | uc001uzx.4 | Silent                | SNP | 37 |
| 6 | GCLC      | uc003pbx.3 | 3'UTR                 | SNP | 37 |
| 6 | OR4N4     | uc001yuc.1 | Missense_Mutation     | SNP | 37 |
| 6 | CACNA1G   | uc002irk.1 | Silent                | SNP | 37 |
| 6 | SP140     | uc002vql.3 | Splice_Site           | SNP | 37 |

|   |          |            |                       |     |    |
|---|----------|------------|-----------------------|-----|----|
| 6 | CILP     | uc002aon.2 | Missense_Mutation     | SNP | 37 |
| 6 | MYO7A    | uc001oyb.2 | Intron                | SNP | 37 |
| 6 | TRIB3    | uc002wdn.3 | Missense_Mutation     | SNP | 37 |
| 6 | MGC70870 | uc002kgk.4 | Non-coding_Transcript | SNP | 37 |
| 6 | OR10G9   | uc010sad.2 | Silent                | SNP | 37 |
| 6 | ZNF667   | uc002qne.3 | Missense_Mutation     | SNP | 37 |
| 6 | FAT3     | uc001pdj.4 | Silent                | SNP | 37 |
| 6 | C9orf174 | uc011lut.2 | Missense_Mutation     | SNP | 37 |
| 6 | SEPT7P2  | uc003tnh.3 | Non-coding_Transcript | SNP | 37 |
| 6 | FUT6     | uc002mdf.1 | 3'UTR                 | SNP | 37 |
| 6 | OR5AK2   | uc010rjp.2 | Silent                | SNP | 37 |
| 6 | C8A      | uc001cyo.2 | Missense_Mutation     | SNP | 37 |
| 6 | JA040725 | uc022bqs.1 | Intron                | SNP | 37 |
| 6 | DDX19B   | uc002eys.3 | Silent                | SNP | 37 |
| 6 | RAP1GAP2 | uc010ckd.3 | Missense_Mutation     | SNP | 37 |
| 6 | STAB1    | uc003del.3 | 5'UTR                 | SNP | 37 |
| 6 | MFSD2A   | uc001cev.3 | Silent                | SNP | 37 |
| 6 | ZG16     | uc002dtr.4 | 3'UTR                 | SNP | 37 |
| 6 | CGB8     | uc002pmb.4 | 5'UTR                 | SNP | 37 |
| 6 | WRAP53   | uc010vuh.2 | Splice_Site           | SNP | 37 |
| 6 | N6AMT1   | uc002ymo.1 | Silent                | SNP | 37 |
| 6 | MXRA5    | uc004crg.4 | Missense_Mutation     | SNP | 37 |
| 6 | CPS1     | uc010fur.3 | Silent                | SNP | 37 |
| 6 | BPIFB1   | uc002wyw.1 | Splice_Site           | SNP | 37 |
| 6 | UTP14A   | uc004euz.3 | Silent                | SNP | 37 |
| 6 | MYO1H    | uc010sxn.1 | Missense_Mutation     | SNP | 37 |
| 6 | SGCG     | uc001uom.2 | Missense_Mutation     | SNP | 37 |
| 6 | WNT11    | uc001oxe.3 | Silent                | SNP | 37 |
| 6 | GJB5     | uc001bxu.3 | Silent                | SNP | 37 |
| 6 | PRRX1    | uc001ghe.3 | Missense_Mutation     | SNP | 37 |
| 6 | HLA-A    | uc003nol.3 | Missense_Mutation     | SNP | 37 |
| 6 | PSG9     | uc002owd.4 | Missense_Mutation     | SNP | 37 |
| 6 | GSS      | uc002xbg.3 | Silent                | SNP | 37 |
| 6 | KLK7     | uc002puo.3 | Missense_Mutation     | SNP | 37 |
| 6 | GNMT     | uc003otd.3 | Intron                | SNP | 37 |
| 6 | TMPO     | uc001tfh.2 | Missense_Mutation     | SNP | 37 |
| 6 | FADS3    | uc001nsm.3 | 3'UTR                 | SNP | 37 |
| 6 | RAB4B    | uc002opf.2 | Missense_Mutation     | SNP | 37 |
| 6 | ADH1A    | uc010ilf.1 | Missense_Mutation     | SNP | 37 |
| 6 | GPR112   | uc004ezu.1 | Missense_Mutation     | SNP | 37 |
| 6 | ALG13    | uc011msy.2 | Missense_Mutation     | SNP | 37 |
| 6 | CSDAP1   | uc010vfr.1 | 3'UTR                 | SNP | 37 |
| 6 | GRIN3A   | uc004bbp.2 | Silent                | SNP | 37 |

|   |              |            |                   |     |    |
|---|--------------|------------|-------------------|-----|----|
| 6 | ZFP112       | uc010xxa.2 | Missense_Mutation | SNP | 37 |
| 6 | C1RL         | uc001qsn.3 | Missense_Mutation | SNP | 37 |
| 6 | MMP9         | uc002xqz.3 | Missense_Mutation | SNP | 37 |
| 6 | ZNF117       | uc003ttr.2 | Silent            | SNP | 37 |
| 6 | LOC100233156 | uc011mfn.2 | Intron            | SNP | 37 |
| 6 | C1orf106     | uc001gvo.3 | 3'UTR             | SNP | 37 |
| 6 | HABP2        | uc010qry.1 | Missense_Mutation | SNP | 37 |
| 6 | PAK4         | uc002okj.1 | Missense_Mutation | SNP | 37 |
| 6 | MUTYH        | uc009vxp.3 | Silent            | SNP | 37 |
| 6 | ZNF300       | uc021yfx.1 | Missense_Mutation | SNP | 37 |
| 6 | WDR33        | uc002tpi.2 | Missense_Mutation | SNP | 37 |
| 6 | WBSCR16      | uc003ubr.3 | Missense_Mutation | SNP | 37 |
| 6 | SYBU         | uc003yni.4 | 5'UTR             | SNP | 37 |
| 6 | MAP1A        | uc001zrt.3 | Missense_Mutation | SNP | 37 |
| 6 | TMC6         | uc002juj.1 | Silent            | SNP | 37 |
| 6 | CD1B         | uc001frx.3 | Missense_Mutation | SNP | 37 |
| 6 | CCDC22       | uc004dnd.2 | Missense_Mutation | SNP | 37 |
| 6 | MYOCD        | uc002gno.2 | 5'UTR             | SNP | 37 |
| 6 | RCN1         | uc010reb.2 | Silent            | SNP | 37 |
| 6 | ROCK1        | uc002kte.3 | Silent            | SNP | 37 |
| 6 | APBA3        | uc002lyp.1 | Nonsense_Mutation | SNP | 37 |
| 6 | TREM1        | uc003oqf.2 | Missense_Mutation | SNP | 37 |
| 6 | ADAMTS8      | uc001qgg.4 | Missense_Mutation | SNP | 37 |
| 6 | ADAMTS9      | uc003dmh.1 | 3'UTR             | SNP | 37 |
| 6 | ZIC5         | uc001vom.1 | Missense_Mutation | SNP | 37 |
| 6 | RHBDD1       | uc002voj.3 | 5'UTR             | SNP | 37 |
| 6 | NLRP11       | uc010ygf.2 | Nonsense_Mutation | SNP | 37 |
| 6 | TRIM35       | uc003xfl.1 | Missense_Mutation | SNP | 37 |
| 6 | AK309286     | uc010jqw.1 | Silent            | SNP | 37 |
| 6 | RBMS3        | uc010hfq.3 | 3'UTR             | SNP | 37 |
| 6 | SCN1A        | uc002udo.4 | Missense_Mutation | SNP | 37 |
| 6 | NAV1         | uc021phi.1 | Missense_Mutation | SNP | 37 |
| 6 | C16orf53     | uc002dug.4 | Missense_Mutation | SNP | 37 |
| 6 | INHBA        | uc003thq.3 | Nonsense_Mutation | SNP | 37 |
| 6 | ZDHHC1       | uc010vjm.2 | Silent            | SNP | 37 |
| 6 | TMEM136      | uc001pxj.3 | Missense_Mutation | SNP | 37 |
| 6 | CCM2         | uc011kcc.2 | 3'UTR             | SNP | 37 |
| 6 | ZSCAN18      | uc010yht.1 | Missense_Mutation | SNP | 37 |
| 6 | MORC1        | uc003dxl.3 | Missense_Mutation | SNP | 37 |
| 6 | CHGB         | uc002wmg.3 | Missense_Mutation | SNP | 37 |
| 6 | SLC12A6      | uc001zhv.3 | Silent            | SNP | 37 |
| 6 | IP6K3        | uc010jvf.2 | Silent            | SNP | 37 |
| 6 | GPR112       | uc004ezu.1 | Silent            | SNP | 37 |

|   |             |            |                       |     |    |
|---|-------------|------------|-----------------------|-----|----|
| 6 | NR5A2       | uc001gvb.3 | 5'UTR                 | SNP | 37 |
| 6 | ZNF44       | uc002mtl.3 | Intron                | SNP | 37 |
| 6 | SCN3A       | uc002ucx.3 | Missense_Mutation     | SNP | 37 |
| 6 | TTC6        | uc001wug.3 | Non-coding_Transcript | SNP | 37 |
| 6 | FREM1       | uc003zlm.3 | Missense_Mutation     | SNP | 37 |
| 6 | HCFC1       | uc004fjp.3 | Missense_Mutation     | SNP | 37 |
| 6 | KIAA1244    | uc003qhu.3 | Silent                | SNP | 37 |
| 6 | KCNH7       | uc002uch.2 | Missense_Mutation     | SNP | 37 |
| 6 | ATG7        | uc003bwc.3 | Splice_Site           | SNP | 37 |
| 6 | PITPNM3     | uc002gdd.4 | Missense_Mutation     | SNP | 37 |
| 6 | TTBK1       | uc003ouq.1 | Missense_Mutation     | SNP | 37 |
| 6 | KIF21B      | uc001gvs.2 | Missense_Mutation     | SNP | 37 |
| 6 | CBL         | uc001pwe.3 | Silent                | SNP | 37 |
| 6 | MAP4K1      | uc002oix.1 | Silent                | SNP | 37 |
| 6 | CSTL1       | uc002wte.3 | 5'UTR                 | SNP | 37 |
| 6 | ABCA3       | uc002cpy.1 | Silent                | SNP | 37 |
| 6 | CYP2C19     | uc010qnz.2 | Silent                | SNP | 37 |
| 6 | C15orf55    | uc010ucc.2 | Missense_Mutation     | SNP | 37 |
| 6 | LRP12       | uc003yma.3 | Missense_Mutation     | SNP | 37 |
| 6 | KIAA1683    | uc010ebn.2 | Intron                | SNP | 37 |
| 6 | ADAMTS8     | uc001qgg.4 | Missense_Mutation     | SNP | 37 |
| 6 | BCLAF1      | uc003qgx.1 | Missense_Mutation     | SNP | 37 |
| 6 | SLC7A3      | uc004dyn.3 | Silent                | SNP | 37 |
| 6 | NUCB2       | uc001mmw.3 | Missense_Mutation     | SNP | 37 |
| 6 | NT5DC3      | uc010swe.1 | 3'UTR                 | SNP | 37 |
| 6 | PCDHAC2     | uc003lhf.2 | Silent                | SNP | 37 |
| 6 | LOC283585   | uc001xvs.3 | Non-coding_Transcript | SNP | 37 |
| 6 | KAT6B       | uc001jwn.1 | Silent                | SNP | 37 |
| 6 | MYH8        | uc002gmm.2 | Missense_Mutation     | SNP | 37 |
| 6 | CDH8        | uc002eog.2 | Missense_Mutation     | SNP | 37 |
| 6 | ATP6V0D1    | uc010vjo.1 | Missense_Mutation     | SNP | 37 |
| 6 | MTUS2       | uc001usl.4 | Silent                | SNP | 37 |
| 6 | ADCY5       | uc003egh.2 | Silent                | SNP | 37 |
| 6 | FPGT-TNNI3K | uc001dge.2 | Missense_Mutation     | SNP | 37 |
| 6 | LUC7L3      | uc002isq.3 | Silent                | SNP | 37 |
| 6 | PROM1       | uc003goo.2 | Missense_Mutation     | SNP | 37 |
| 6 | PTGIR       | uc002pex.3 | Missense_Mutation     | SNP | 37 |
| 6 | WNT9B       | uc002ikw.1 | Missense_Mutation     | SNP | 37 |
| 6 | MAP1S       | uc002nhe.1 | Nonsense_Mutation     | SNP | 37 |
| 6 | PLEKHD1     | uc010ttf.1 | 5'UTR                 | SNP | 37 |
| 6 | OSTalpha    | uc003fwd.3 | Missense_Mutation     | SNP | 37 |
| 6 | STAR4       | uc003kph.1 | Missense_Mutation     | SNP | 37 |
| 6 | DQ587763    | uc011cof.2 | Non-coding_Transcript | SNP | 37 |

|   |           |            |                       |     |    |
|---|-----------|------------|-----------------------|-----|----|
| 6 | SCAND3    | uc003nlo.3 | Missense_Mutation     | SNP | 37 |
| 6 | NEUROD6   | uc003tch.3 | Silent                | SNP | 37 |
| 6 | FLJ25758  | uc002mfy.2 | Non-coding_Transcript | SNP | 37 |
| 6 | ACSL6     | uc003kvx.2 | Nonsense_Mutation     | SNP | 37 |
| 6 | RASA2     | uc010huq.1 | Missense_Mutation     | SNP | 37 |
| 6 | DIO3AS    | uc001ykf.3 | 5'UTR                 | SNP | 37 |
| 6 | TRPV4     | uc001tpj.2 | Silent                | SNP | 37 |
| 6 | TBC1D4    | uc001vjl.1 | Missense_Mutation     | SNP | 37 |
| 6 | LHFPL1    | uc004epp.3 | 3'UTR                 | SNP | 37 |
| 6 | FKBP9L    | uc010kzk.3 | 5'UTR                 | SNP | 37 |
| 6 | WNK2      | uc004ati.1 | Missense_Mutation     | SNP | 37 |
| 6 | ERI2      | uc002dhs.3 | Missense_Mutation     | SNP | 37 |
| 6 | ARMC2     | uc003ps.4  | Missense_Mutation     | SNP | 37 |
| 6 | WEE2      | uc003vwn.2 | Missense_Mutation     | SNP | 37 |
| 6 | MYH11     | uc002ddx.3 | Missense_Mutation     | SNP | 37 |
| 6 | LTBP4     | uc002ooh.1 | Silent                | SNP | 37 |
| 6 | ARL5C     | uc010wea.2 | 5'UTR                 | SNP | 37 |
| 6 | GABRA1    | uc010jiw.3 | 3'UTR                 | SNP | 37 |
| 6 | KBTBD6    | uc001uxu.1 | 3'UTR                 | SNP | 37 |
| 6 | DCP1A     | uc021wzi.1 | Missense_Mutation     | SNP | 37 |
| 6 | PIWIL2    | uc003xbn.2 | Silent                | SNP | 37 |
| 6 | CTAGE5    | uc001wvi.4 | Missense_Mutation     | SNP | 37 |
| 6 | MAGED1    | uc004dpn.3 | Missense_Mutation     | SNP | 37 |
| 6 | KCNK13    | uc001xye.1 | Missense_Mutation     | SNP | 37 |
| 6 | NPR1      | uc001fcs.4 | Missense_Mutation     | SNP | 37 |
| 6 | NEUROD4   | uc001sgp.4 | Missense_Mutation     | SNP | 37 |
| 6 | VPS53     | uc010cjo.2 | 5'UTR                 | SNP | 37 |
| 6 | C11orf49  | uc001ndq.3 | 3'UTR                 | SNP | 37 |
| 6 | DNAH9     | uc002gne.3 | Missense_Mutation     | SNP | 37 |
| 6 | QPRT      | uc002dto.3 | Missense_Mutation     | SNP | 37 |
| 6 | ILF3      | uc002mpp.3 | 3'UTR                 | SNP | 37 |
| 6 | KRT37     | uc002hwp.1 | Missense_Mutation     | SNP | 37 |
| 6 | EDIL3     | uc003kio.1 | Missense_Mutation     | SNP | 37 |
| 6 | SYNDIG1L  | uc001xpx.2 | Missense_Mutation     | SNP | 37 |
| 6 | STK32A    | uc011dbw.1 | Intron                | SNP | 37 |
| 6 | ZC3HAV1   | uc003vun.3 | Silent                | SNP | 37 |
| 6 | SERPINA10 | uc001yct.3 | Missense_Mutation     | SNP | 37 |
| 6 | ZNF878    | uc002mta.1 | Silent                | SNP | 37 |
| 6 | PTPRD     | uc003zkk.3 | Missense_Mutation     | SNP | 37 |
| 6 | NRIP2     | uc001qlc.3 | Missense_Mutation     | SNP | 37 |
| 6 | KLHL38    | uc003yqs.1 | Missense_Mutation     | SNP | 37 |
| 6 | ATP2B4    | uc001gzw.3 | Intron                | SNP | 37 |
| 6 | LOC341056 | uc010rzt.2 | Non-coding_Transcript | SNP | 37 |



|   |              |            |                   |     |    |
|---|--------------|------------|-------------------|-----|----|
| 6 | HYDIN        | uc002ezr.3 | Missense_Mutation | SNP | 37 |
| 6 | CYP2D6       | uc003bce.3 | 5'UTR             | SNP | 37 |
| 6 | DNAH14       | uc001how.2 | Silent            | SNP | 37 |
| 6 | DSE          | uc011ebg.2 | Missense_Mutation | SNP | 37 |
| 6 | CROCC        | uc001azt.2 | Missense_Mutation | SNP | 37 |
| 6 | PTPRT        | uc010ggj.3 | Silent            | SNP | 37 |
| 6 | FLG2         | uc001ezw.4 | Missense_Mutation | SNP | 37 |
| 6 | AGAP1        | uc002vvs.3 | 3'UTR             | SNP | 37 |
| 6 | C7           | uc003jmh.3 | Missense_Mutation | SNP | 37 |
| 6 | RSF1         | uc001oyn.3 | Silent            | SNP | 37 |
| 6 | SLC2A12      | uc003qem.1 | Silent            | SNP | 37 |
| 6 | GALNS        | uc010cid.3 | Missense_Mutation | SNP | 37 |
| 6 | DCAF8        | uc001fvs.2 | 3'UTR             | SNP | 37 |
| 6 | PRICKLE4     | uc011duf.1 | Missense_Mutation | SNP | 37 |
| 6 | ZBTB32       | uc002oay.3 | Silent            | SNP | 37 |
| 6 | DDX28        | uc002evh.2 | Silent            | SNP | 37 |
| 6 | PSMG4        | uc010jnl.1 | Missense_Mutation | SNP | 37 |
| 6 | LOC100506688 | uc021xvx.1 | Missense_Mutation | SNP | 37 |
| 6 | FBLN5        | uc010aue.3 | Missense_Mutation | SNP | 37 |
| 6 | PCDHAC2      | uc003lii.3 | Nonsense_Mutation | SNP | 37 |
| 6 | MOV10L1      | uc003bjj.3 | Silent            | SNP | 37 |
| 6 | WDR62        | uc002odd.2 | 5'UTR             | SNP | 37 |
| 6 | PTPRG        | uc003dlb.3 | Silent            | SNP | 37 |
| 6 | ADAM18       | uc003xni.3 | Missense_Mutation | SNP | 37 |
| 6 | ZNF618       | uc004bid.3 | Silent            | SNP | 37 |
| 6 | CHRNA4       | uc002yes.2 | 3'UTR             | SNP | 37 |
| 6 | CD1C         | uc001fru.3 | Silent            | SNP | 37 |
| 6 | COL10A1      | uc003pwm.3 | Missense_Mutation | SNP | 37 |
| 6 | PPM1M        | uc003ddh.4 | 5'UTR             | SNP | 37 |
| 6 | SLC22A11     | uc001oai.3 | Silent            | SNP | 37 |
| 6 | HNF1A        | uc021rfa.1 | Splice_Site       | SNP | 37 |
| 6 | MYO5B        | uc002leb.2 | Silent            | SNP | 37 |
| 6 | KIF9         | uc010hjp.3 | Silent            | SNP | 37 |
| 6 | SPHK2        | uc010xzu.1 | 3'UTR             | SNP | 37 |
| 6 | MATN4        | uc002xnn.2 | Missense_Mutation | SNP | 37 |
| 6 | SLC2A12      | uc003qem.1 | Silent            | SNP | 37 |
| 6 | MYH15        | uc003dxa.1 | Missense_Mutation | SNP | 37 |
| 6 | DCHS2        | uc003inx.2 | Missense_Mutation | SNP | 37 |
| 6 | NOTCH2       | uc021osy.1 | 3'UTR             | SNP | 37 |
| 6 | FBXO42       | uc001ayg.3 | Missense_Mutation | SNP | 37 |
| 6 | DHRS4        | uc010alc.3 | Splice_Site       | SNP | 37 |
| 6 | KNDC1        | uc001llz.1 | Missense_Mutation | SNP | 37 |
| 6 | OR10A4       | uc010rat.2 | Silent            | SNP | 37 |

|   |          |            |                       |     |    |
|---|----------|------------|-----------------------|-----|----|
| 6 | ZNF284   | uc002oyg.1 | Missense_Mutation     | SNP | 37 |
| 6 | SEMG2    | uc010ggz.3 | Missense_Mutation     | SNP | 37 |
| 6 | ADAMTS6  | uc003jtp.3 | Missense_Mutation     | SNP | 37 |
| 6 | C1orf61  | uc001fou.1 | Intron                | SNP | 37 |
| 6 | DDX56    | uc003tlg.3 | Missense_Mutation     | SNP | 37 |
| 6 | TMX1     | uc001wza.4 | 5'UTR                 | SNP | 37 |
| 6 | HAO2     | uc001ehr.1 | Missense_Mutation     | SNP | 37 |
| 6 | HIP1R    | uc001udj.1 | Missense_Mutation     | SNP | 37 |
| 6 | C19orf12 | uc002nsl.3 | Missense_Mutation     | SNP | 37 |
| 6 | IBTK     | uc003pjl.1 | Missense_Mutation     | SNP | 37 |
| 6 | ATG7     | uc003bwc.3 | Silent                | SNP | 37 |
| 6 | ATP8B3   | uc002ltw.3 | Silent                | SNP | 37 |
| 6 | ZBTB8B   | uc001bvl.4 | Missense_Mutation     | SNP | 37 |
| 6 | OR2L8    | uc001idt.1 | Silent                | SNP | 37 |
| 6 | PPP1R21  | uc002rwm.3 | Silent                | SNP | 37 |
| 6 | DISC1    | uc010pxe.2 | Silent                | SNP | 37 |
| 6 | SESN1    | uc003psu.3 | Silent                | SNP | 37 |
| 6 | KRT34    | uc002hwm.3 | Silent                | SNP | 37 |
| 6 | MYO7B    | uc002tos.2 | Missense_Mutation     | SNP | 37 |
| 6 | VSTM2A   | uc010kzf.3 | 3'UTR                 | SNP | 37 |
| 6 | RWDD2A   | uc003pjx.4 | Silent                | SNP | 37 |
| 6 | LRRC61   | uc003wgv.3 | Silent                | SNP | 37 |
| 6 | COL12A1  | uc021zbv.1 | Missense_Mutation     | SNP | 37 |
| 6 | PARP9    | uc010hri.3 | Silent                | SNP | 37 |
| 6 | EVI5     | uc010otf.2 | 3'UTR                 | SNP | 37 |
| 6 | NHSL2    | uc011mqa.2 | Missense_Mutation     | SNP | 37 |
| 6 | PCSK6    | uc002bxa.2 | Missense_Mutation     | SNP | 37 |
| 6 | COL6A1   | uc002zhu.1 | Silent                | SNP | 37 |
| 6 | MYH7     | uc001wjx.3 | Splice_Site           | SNP | 37 |
| 6 | ACTL7A   | uc004bdj.1 | Missense_Mutation     | SNP | 37 |
| 6 | ADCK3    | uc001hqm.1 | 3'UTR                 | SNP | 37 |
| 6 | TMC6     | uc002juj.1 | Missense_Mutation     | SNP | 37 |
| 6 | GUCY1A3  | uc003iov.3 | Missense_Mutation     | SNP | 37 |
| 6 | PCDHGC5  | uc003ljp.1 | 3'UTR                 | SNP | 37 |
| 6 | CELSR1   | uc003bhw.1 | Silent                | SNP | 37 |
| 6 | PNPLA3   | uc003bei.1 | Missense_Mutation     | SNP | 37 |
| 6 | AOAH     | uc022abu.1 | Silent                | SNP | 37 |
| 6 | MAP4K5   | uc001wya.3 | Silent                | SNP | 37 |
| 6 | FAM182B  | uc002wvd.1 | Non-coding_Transcript | SNP | 37 |
| 6 | SALL2    | uc010tma.1 | Missense_Mutation     | SNP | 37 |
| 6 | ZNF536   | uc002nsu.1 | Missense_Mutation     | SNP | 37 |
| 6 | CD1D     | uc009wsr.1 | 3'UTR                 | SNP | 37 |
| 6 | RBBP6    | uc002dmh.3 | Missense_Mutation     | SNP | 37 |

|   |          |            |                   |     |    |
|---|----------|------------|-------------------|-----|----|
| 6 | OR7D2    | uc002mkz.1 | Silent            | SNP | 37 |
| 6 | MS4A2    | uc009ymu.3 | 3'UTR             | SNP | 37 |
| 6 | MAGEL2   | uc001ywj.4 | 3'UTR             | SNP | 37 |
| 6 | HAUS7    | uc004fhn.2 | 5'UTR             | SNP | 37 |
| 6 | RABGGTB  | uc001dgy.1 | Silent            | SNP | 37 |
| 6 | ALDH2    | uc001tst.3 | Silent            | SNP | 37 |
| 6 | IPW      | uc001yxh.1 | Intron            | SNP | 37 |
| 6 | KDELR1   | uc002pjb.1 | Silent            | SNP | 37 |
| 6 | GLT25D2  | uc001gqr.3 | Silent            | SNP | 37 |
| 6 | DAPK3    | uc002lzb.1 | 5'UTR             | SNP | 37 |
| 6 | LENG8    | uc002qfv.1 | Silent            | SNP | 37 |
| 6 | FGF14    | uc001vpf.2 | Missense_Mutation | SNP | 37 |
| 6 | L3MBTL2  | uc003azo.3 | 3'UTR             | SNP | 37 |
| 6 | KCND2    | uc003vjj.1 | Missense_Mutation | SNP | 37 |
| 6 | GOLT1A   | uc001has.1 | 3'UTR             | SNP | 37 |
| 6 | SLC4A2   | uc022apz.1 | Missense_Mutation | SNP | 37 |
| 6 | TACC2    | uc001lfv.3 | Silent            | SNP | 37 |
| 6 | BC037321 | uc001alo.4 | Silent            | SNP | 37 |
| 6 | SYNE1    | uc010kjb.1 | 3'UTR             | SNP | 37 |
| 6 | HOMER3   | uc002nku.2 | Silent            | SNP | 37 |
| 6 | NPAS4    | uc001ohx.1 | 3'UTR             | SNP | 37 |
| 6 | SPOCK3   | uc011cjq.1 | 5'UTR             | SNP | 37 |
| 6 | Unknown  |            | IGR               | SNP | 37 |
| 6 | POLR3B   | uc001tlp.3 | Missense_Mutation | SNP | 37 |
| 6 | MCF2L    | uc001vsu.3 | Silent            | SNP | 37 |
| 6 | SHH      | uc003wmk.1 | 3'UTR             | SNP | 37 |
| 6 | GLIPR1   | uc009zsb.1 | Silent            | SNP | 37 |
| 6 | AKAP6    | uc001wrq.3 | Silent            | SNP | 37 |
| 6 | RREB1    | uc003mxb.3 | Silent            | SNP | 37 |
| 6 | ZNF788   | uc002mtc.1 | Missense_Mutation | SNP | 37 |
| 6 | GINS4    | uc003xnx.3 | Splice_Site       | SNP | 37 |
| 6 | SYNE1    | uc021zhb.1 | Splice_Site       | SNP | 37 |
| 6 | YBX2     | uc002gfq.2 | 3'UTR             | SNP | 37 |
| 6 | C16orf11 | uc002chk.3 | Silent            | SNP | 37 |
| 6 | OR6N2    | uc010pir.2 | Missense_Mutation | SNP | 37 |
| 6 | LYPD3    | uc002owl.1 | Missense_Mutation | SNP | 37 |
| 6 | CDC16    | uc001vuk.1 | Missense_Mutation | SNP | 37 |
| 6 | DSC1     | uc002kwn.3 | Silent            | SNP | 37 |
| 6 | FTCD     | uc002zig.3 | Missense_Mutation | SNP | 37 |
| 6 | ASB13    | uc001iig.2 | Intron            | SNP | 37 |
| 6 | PCMTD1   | uc003xqx.4 | 3'UTR             | SNP | 37 |
| 6 | C17orf56 | uc002jzu.2 | Intron            | SNP | 37 |
| 6 | ZFYVE28  | uc003gex.2 | Missense_Mutation | SNP | 37 |

|   |          |            |                   |     |    |
|---|----------|------------|-------------------|-----|----|
| 6 | GATAD2B  | uc001fdb.4 | Silent            | SNP | 37 |
| 6 | SDHA     | uc011clv.1 | Missense_Mutation | SNP | 37 |
| 6 | MEI1     | uc003baz.1 | Silent            | SNP | 37 |
| 6 | FAM181A  | uc001ybz.2 | Silent            | SNP | 37 |
| 6 | PSG4     | uc002ovj.1 | 5'UTR             | SNP | 37 |
| 6 | FCRL5    | uc001fqv.1 | 3'UTR             | SNP | 37 |
| 6 | ERC2     | uc021wzo.1 | Missense_Mutation | SNP | 37 |
| 6 | FXR1     | uc003fks.3 | Missense_Mutation | SNP | 37 |
| 6 | KIF13B   | uc003xhh.4 | Missense_Mutation | SNP | 37 |
| 6 | PDZK1IP1 | uc001cqw.3 | Nonsense_Mutation | SNP | 37 |
| 6 | FA2H     | uc002fde.2 | Splice_Site       | SNP | 37 |
| 6 | PCDHB8   | uc011dai.2 | Missense_Mutation | SNP | 37 |
| 6 | SLC25A6  | uc004cpt.3 | 3'UTR             | SNP | 37 |
| 6 | TBX1     | uc002zqa.1 | Silent            | SNP | 37 |
| 6 | PLG      | uc003qtm.4 | Missense_Mutation | SNP | 37 |
| 6 | TEX15    | uc003xil.3 | Silent            | SNP | 37 |
| 6 | MTMR1    | uc004feh.1 | Silent            | SNP | 37 |
| 6 | DUSP26   | uc003xjp.3 | Missense_Mutation | SNP | 37 |
| 6 | WWC1     | uc011den.2 | Silent            | SNP | 37 |
| 6 | RAMP3    | uc003tnb.3 | Silent            | SNP | 37 |
| 6 | USP34    | uc002sbe.3 | Silent            | SNP | 37 |
| 6 | ATP2B2   | uc003bvt.3 | Silent            | SNP | 37 |
| 6 | CEP170   | uc021plo.1 | Missense_Mutation | SNP | 37 |
| 6 | RIF1     | uc002txm.3 | Silent            | SNP | 37 |
| 6 | ZNF441   | uc010dyj.3 | Missense_Mutation | SNP | 37 |
| 6 | KCNH5    | uc001xfx.3 | Silent            | SNP | 37 |
| 6 | SBF2     | uc001mib.2 | Silent            | SNP | 37 |
| 6 | ATRX     | uc004ecp.4 | Missense_Mutation | SNP | 37 |
| 6 | FER1L6   | uc003yqw.3 | Missense_Mutation | SNP | 37 |
| 6 | SLC2A14  | uc001qtk.3 | 5'UTR             | SNP | 37 |
| 6 | USP9X    | uc004dfb.3 | Silent            | SNP | 37 |
| 6 | C7       | uc003jmh.3 | Missense_Mutation | SNP | 37 |
| 6 | PLEKHA7  | uc010rcu.1 | Missense_Mutation | SNP | 37 |
| 6 | NCOA6    | uc002xav.3 | Missense_Mutation | SNP | 37 |
| 6 | AMICA1   | uc001psk.2 | Silent            | SNP | 37 |
| 6 | ECT2L    | uc003qif.2 | Missense_Mutation | SNP | 37 |
| 6 | WDR87    | uc002ohj.2 | Nonsense_Mutation | SNP | 37 |
| 6 | FOXP2    | uc003vhc.3 | 3'UTR             | SNP | 37 |
| 6 | ADCY10   | uc001ger.3 | Missense_Mutation | SNP | 37 |
| 6 | GLTPD2   | uc002fza.2 | 5'UTR             | SNP | 37 |
| 6 | SYK      | uc004aqz.3 | Silent            | SNP | 37 |
| 6 | TNK1     | uc002ggi.4 | Missense_Mutation | SNP | 37 |
| 6 | MYO18B   | uc003abz.1 | Missense_Mutation | SNP | 37 |

|   |              |            |                   |     |    |
|---|--------------|------------|-------------------|-----|----|
| 6 | USP19        | uc003cvz.4 | Missense_Mutation | SNP | 37 |
| 6 | OR2T3        | uc001iel.1 | Silent            | SNP | 37 |
| 6 | MYH15        | uc003dxa.1 | Missense_Mutation | SNP | 37 |
| 6 | ANKRD7       | uc003vji.3 | 5'UTR             | SNP | 37 |
| 6 | TFEC         | uc003vhj.2 | Missense_Mutation | SNP | 37 |
| 6 | ZFP62        | uc011dhf.2 | Silent            | SNP | 37 |
| 6 | NT5C1B-RDH14 | uc010exr.3 | Missense_Mutation | SNP | 37 |
| 6 | TCF21        | uc003qei.4 | Silent            | SNP | 37 |
| 6 | FAM18A       | uc010buo.1 | 5'UTR             | SNP | 37 |
| 6 | ADAMTS10     | uc002mkj.1 | Silent            | SNP | 37 |
| 6 | PPP4R1       | uc002koe.1 | Missense_Mutation | SNP | 37 |
| 6 | DNAH10       | uc001uft.4 | Silent            | SNP | 37 |
| 6 | DPY19L2P2    | uc003vbh.4 | 5'UTR             | SNP | 37 |
| 6 | SPEF2        | uc003jjo.3 | Missense_Mutation | SNP | 37 |
| 6 | FOXN1        | uc010crm.3 | Missense_Mutation | SNP | 37 |
| 6 | NLRP7        | uc010esl.3 | Silent            | SNP | 37 |
| 6 | PTDSS1       | uc003yht.1 | Missense_Mutation | SNP | 37 |
| 6 | ZNF225       | uc002oyj.1 | Silent            | SNP | 37 |
| 6 | NTSR2        | uc002rbq.4 | 5'UTR             | SNP | 37 |
| 6 | DNAH2        | uc002giu.1 | Silent            | SNP | 37 |
| 6 | SPHK2        | uc010xzu.1 | 3'UTR             | SNP | 37 |
| 6 | AP2A1        | uc002ppn.3 | Missense_Mutation | SNP | 37 |
| 6 | ANKFY1       | uc010vrz.2 | Nonsense_Mutation | SNP | 37 |
| 6 | ITGB5        | uc003eho.3 | Silent            | SNP | 37 |
| 6 | KLC3         | uc002pbg.1 | Missense_Mutation | SNP | 37 |
| 6 | SP110        | uc002vqg.3 | Missense_Mutation | SNP | 37 |
| 6 | MINA         | uc003drz.1 | Missense_Mutation | SNP | 37 |
| 6 | Unknown      |            | IGR               | SNP | 37 |
| 6 | OR5T3        | uc010rjd.2 | Missense_Mutation | SNP | 37 |
| 6 | KCNS3        | uc002rcv.3 | Missense_Mutation | SNP | 37 |
| 6 | PIK3C3       | uc002lap.3 | Missense_Mutation | SNP | 37 |
| 6 | NOS1         | uc001twn.2 | Missense_Mutation | SNP | 37 |
| 6 | SCARF2       | uc002zsj.2 | Silent            | SNP | 37 |
| 6 | CACNB4       | uc002txy.3 | 5'UTR             | SNP | 37 |
| 6 | CDC20B       | uc003jpo.2 | Silent            | SNP | 37 |
| 6 | MKI67        | uc001lke.3 | Missense_Mutation | SNP | 37 |
| 6 | EYA1         | uc003xys.4 | 3'UTR             | SNP | 37 |
| 6 | DNAH2        | uc002giu.1 | Missense_Mutation | SNP | 37 |
| 6 | PPIAL4G      | uc001ejt.3 | Missense_Mutation | SNP | 37 |
| 6 | PDZD2        | uc003jhl.3 | 5'UTR             | SNP | 37 |
| 6 | CHD7         | uc003xue.3 | Nonsense_Mutation | SNP | 37 |
| 6 | TMPRSS4      | uc021qrd.1 | Silent            | SNP | 37 |
| 6 | Unknown      |            | IGR               | SNP | 37 |

|   |           |            |                       |     |    |
|---|-----------|------------|-----------------------|-----|----|
| 6 | TMEM194B  | uc010zgf.2 | Missense_Mutation     | SNP | 37 |
| 6 | BC084560  | uc003teo.1 | Non-coding_Transcript | SNP | 37 |
| 6 | TUB       | uc001mfy.3 | Silent                | SNP | 37 |
| 6 | CDSN      | uc003nsm.2 | 3'UTR                 | SNP | 37 |
| 6 | OR2T3     | uc001iel.1 | Silent                | SNP | 37 |
| 6 | DYSF      | uc010fen.3 | Missense_Mutation     | SNP | 37 |
| 6 | PHF21A    | uc001ncc.4 | Silent                | SNP | 37 |
| 6 | SF3A2     | uc002lvj.3 | Missense_Mutation     | SNP | 37 |
| 6 | ZNF589    | uc003csl.4 | Missense_Mutation     | SNP | 37 |
| 6 | PRMT5     | uc001whm.1 | Missense_Mutation     | SNP | 37 |
| 6 | USP24     | uc021onw.1 | Silent                | SNP | 37 |
| 6 | ATP1A1    | uc001ege.3 | Silent                | SNP | 37 |
| 6 | CBY1      | uc003awb.3 | Missense_Mutation     | SNP | 37 |
| 6 | MUC6      | uc001lsw.2 | Missense_Mutation     | SNP | 37 |
| 6 | LINC00478 | uc002ykb.2 | Intron                | SNP | 37 |
| 6 | BAGE1     | uc011mgu.1 | Non-coding_Transcript | SNP | 37 |
| 6 | SLC39A12  | uc001ipo.2 | Missense_Mutation     | SNP | 37 |
| 6 | SCAI      | uc004bpd.3 | Missense_Mutation     | SNP | 37 |
| 6 | DLX2      | uc002uhn.3 | Silent                | SNP | 37 |
| 6 | NES       | uc001fpq.3 | 3'UTR                 | SNP | 37 |
| 6 | ITGA2B    | uc002igu.1 | 3'UTR                 | SNP | 37 |
| 6 | FOLH1     | uc001ngy.3 | Missense_Mutation     | SNP | 37 |
| 6 | LRIT2     | uc010qmc.2 | Missense_Mutation     | SNP | 37 |
| 6 | CNTN4     | uc003bpc.3 | Silent                | SNP | 37 |
| 6 | LY6D      | uc003yxf.1 | 5'UTR                 | SNP | 37 |
| 6 | SYNE1     | uc021zhh.1 | Nonsense_Mutation     | SNP | 37 |
| 6 | NOL10     | uc002raq.2 | Missense_Mutation     | SNP | 37 |
| 6 | SIGLEC1   | uc002wja.3 | Silent                | SNP | 37 |
| 6 | USP34     | uc002sbe.3 | Missense_Mutation     | SNP | 37 |
| 6 | CHRNA2    | uc010lur.3 | Silent                | SNP | 37 |
| 6 | CD163L1   | uc010sge.2 | Missense_Mutation     | SNP | 37 |
| 6 | TDRD6     | uc003oyj.3 | Missense_Mutation     | SNP | 37 |
| 6 | PTN       | uc003vtq.2 | 5'UTR                 | SNP | 37 |
| 6 | CARD10    | uc003asv.1 | 5'UTR                 | SNP | 37 |
| 6 | BEST3     | uc001svg.3 | Silent                | SNP | 37 |
| 6 | HIST3H2A  | uc001hsy.3 | Silent                | SNP | 37 |
| 6 | SYPL1     | uc003vdp.3 | Silent                | SNP | 37 |
| 6 | FYB       | uc011cpl.2 | Missense_Mutation     | SNP | 37 |
| 6 | BNC1      | uc002bjt.1 | Missense_Mutation     | SNP | 37 |
| 6 | POPDC3    | uc003prb.3 | Missense_Mutation     | SNP | 37 |
| 6 | ZNF134    | uc002qpn.2 | Missense_Mutation     | SNP | 37 |
| 6 | GSTA4     | uc003pbf.3 | 3'UTR                 | SNP | 37 |
| 6 | PLCB4     | uc021wam.1 | 3'UTR                 | SNP | 37 |

|   |             |            |                       |     |    |
|---|-------------|------------|-----------------------|-----|----|
| 6 | FAM120B     | uc003qxp.3 | Missense_Mutation     | SNP | 37 |
| 6 | FAM75D5     | uc011lst.2 | 3'UTR                 | SNP | 37 |
| 6 | KCNK1       | uc010pxo.1 | Silent                | SNP | 37 |
| 6 | RSAD2       | uc002qyp.1 | Silent                | SNP | 37 |
| 6 | CCDC141     | uc002une.2 | Missense_Mutation     | SNP | 37 |
| 6 | MUC3A       | uc003uxl.1 | 5'UTR                 | SNP | 37 |
| 6 | TAOK2       | uc010bzm.2 | 3'UTR                 | SNP | 37 |
| 6 | HMCN1       | uc001grq.1 | Splice_Site           | SNP | 37 |
| 6 | RAB40C      | uc021szt.1 | Missense_Mutation     | SNP | 37 |
| 6 | GCC1        | uc003vma.3 | Missense_Mutation     | SNP | 37 |
| 6 | OR2L8       | uc001idt.1 | Missense_Mutation     | SNP | 37 |
| 6 | abParts     | uc021vku.1 | Intron                | SNP | 37 |
| 6 | AK310665    | uc010cqz.3 | Non-coding_Transcript | SNP | 37 |
| 6 | TAAR5       | uc003qdk.2 | 5'UTR                 | SNP | 37 |
| 6 | ARHGAP31    | uc003ecj.4 | 3'UTR                 | SNP | 37 |
| 6 | MACC1       | uc003sus.4 | Nonsense_Mutation     | SNP | 37 |
| 6 | BNC2        | uc003zmk.3 | Splice_Site           | SNP | 37 |
| 6 | TBX10       | uc001omp.3 | Missense_Mutation     | SNP | 37 |
| 6 | WDR93       | uc002boj.3 | Silent                | SNP | 37 |
| 6 | HYDIN       | uc010yih.1 | Non-coding_Transcript | SNP | 37 |
| 6 | SVEP1       | uc004beu.2 | 3'UTR                 | SNP | 37 |
| 6 | OR9Q1       | uc001nmj.3 | Missense_Mutation     | SNP | 37 |
| 6 | IQCJ-SCHIP1 | uc003fcq.2 | Silent                | SNP | 37 |
| 6 | GRN         | uc002igp.1 | Silent                | SNP | 37 |
| 6 | SPTBN4      | uc002ony.3 | Missense_Mutation     | SNP | 37 |
| 6 | WDR87       | uc002ohj.2 | Silent                | SNP | 37 |
| 6 | SCIN        | uc003ssn.4 | Missense_Mutation     | SNP | 37 |
| 6 | NLGN4Y      | uc011nas.1 | 3'UTR                 | SNP | 37 |
| 6 | PGK2        | uc003ozu.3 | Missense_Mutation     | SNP | 37 |
| 6 | IRAK2       | uc003bve.1 | Missense_Mutation     | SNP | 37 |
| 6 | GSDMC       | uc003ysr.3 | Silent                | SNP | 37 |
| 6 | ITGA10      | uc001eoa.3 | Silent                | SNP | 37 |
| 6 | DL490867    | uc021trx.1 | 5'Flank               | SNP | 37 |
| 6 | NFX1        | uc003zsr.3 | Missense_Mutation     | SNP | 37 |
| 6 | HIVEP1      | uc003nac.3 | Missense_Mutation     | SNP | 37 |
| 6 | KRT2        | uc001sat.3 | Missense_Mutation     | SNP | 37 |
| 6 | Unknown     |            | IGR                   | SNP | 37 |
| 6 | COL9A1      | uc003pfg.4 | Missense_Mutation     | SNP | 37 |
| 6 | MYCN        | uc002rci.3 | Missense_Mutation     | SNP | 37 |
| 6 | CCDC71L     | uc003vdt.3 | Silent                | SNP | 37 |
| 6 | WDR4        | uc002zck.1 | 3'UTR                 | SNP | 37 |
| 6 | CTR9        | uc001mja.3 | Missense_Mutation     | SNP | 37 |
| 6 | PLAC1L      | uc001nol.3 | Missense_Mutation     | SNP | 37 |

|   |           |            |                       |     |    |
|---|-----------|------------|-----------------------|-----|----|
| 6 | MAP6      | uc001owu.3 | Missense_Mutation     | SNP | 37 |
| 6 | NUP35     | uc002upf.3 | Missense_Mutation     | SNP | 37 |
| 6 | HAMP      | uc002nyw.3 | 3'UTR                 | SNP | 37 |
| 6 | PI16      | uc021yzd.1 | Missense_Mutation     | SNP | 37 |
| 6 | TMPRSS12  | uc001rwx.4 | Missense_Mutation     | SNP | 37 |
| 6 | KBTBD10   | uc002uet.3 | 3'UTR                 | SNP | 37 |
| 6 | KLK7      | uc002puo.3 | Silent                | SNP | 37 |
| 6 | ANK2      | uc003ibe.4 | Missense_Mutation     | SNP | 37 |
| 6 | ZDHHC15   | uc004ecg.3 | Missense_Mutation     | SNP | 37 |
| 6 | PTPRN     | uc002vkz.3 | Missense_Mutation     | SNP | 37 |
| 6 | PDE4D     | uc003jsa.2 | Missense_Mutation     | SNP | 37 |
| 6 | PTPRT     | uc010ggj.3 | Missense_Mutation     | SNP | 37 |
| 6 | ODZ2      | uc010jdd.3 | Missense_Mutation     | SNP | 37 |
| 6 | NAPRT1    | uc003yyo.4 | Missense_Mutation     | SNP | 37 |
| 6 | OR1N2     | uc011lyx.2 | Missense_Mutation     | SNP | 37 |
| 6 | BDKRB2    | uc010avm.1 | Silent                | SNP | 37 |
| 6 | DUSP27    | uc001geb.1 | Silent                | SNP | 37 |
| 6 | RBMS3     | uc003cel.3 | Missense_Mutation     | SNP | 37 |
| 6 | ITGAM     | uc002ebr.3 | Missense_Mutation     | SNP | 37 |
| 6 | ROS1      | uc003pxp.1 | Missense_Mutation     | SNP | 37 |
| 6 | UNCX      | uc011jvw.2 | Missense_Mutation     | SNP | 37 |
| 6 | ANKRD20A2 | uc010fhp.3 | Non-coding_Transcript | SNP | 37 |
| 6 | SH2D4A    | uc011kym.2 | Missense_Mutation     | SNP | 37 |
| 6 | HERC1     | uc002amp.3 | Missense_Mutation     | SNP | 37 |
| 6 | NAPRT1    | uc003yyo.4 | Silent                | SNP | 37 |
| 6 | TP53BP1   | uc001zrr.4 | Missense_Mutation     | SNP | 37 |
| 6 | SEZ6      | uc002hdp.2 | Missense_Mutation     | SNP | 37 |
| 6 | MAGI1     | uc003dmn.3 | Intron                | SNP | 37 |
| 6 | C18orf1   | uc002ksa.2 | 5'UTR                 | SNP | 37 |
| 6 | LRRC30    | uc010wzk.2 | Silent                | SNP | 37 |
| 6 | PRKX      | uc010nde.3 | 3'UTR                 | SNP | 37 |
| 6 | PTPRB     | uc001swc.4 | Intron                | SNP | 37 |
| 6 | PRMT8     | uc001qmf.3 | Missense_Mutation     | SNP | 37 |
| 6 | CABIN1    | uc002zzi.1 | Silent                | SNP | 37 |
| 6 | QPCTL     | uc010xxr.2 | 3'UTR                 | SNP | 37 |
| 6 | LINC00269 | uc004dxj.1 | Missense_Mutation     | SNP | 37 |
| 6 | RAB40B    | uc002kft.3 | Silent                | SNP | 37 |
| 6 | SAMD9L    | uc003umh.1 | Missense_Mutation     | SNP | 37 |
| 6 | RASSF8    | uc001rgx.3 | Silent                | SNP | 37 |
| 6 | TECTA     | uc010rzo.2 | Missense_Mutation     | SNP | 37 |
| 6 | BTLA      | uc003dza.4 | Silent                | SNP | 37 |
| 6 | UPF1      | uc002nkg.3 | Missense_Mutation     | SNP | 37 |
| 6 | SLC9A5    | uc002esm.3 | Silent                | SNP | 37 |



|   |            |            |                       |     |    |
|---|------------|------------|-----------------------|-----|----|
| 6 | SORCS3     | uc001kyi.1 | Silent                | SNP | 37 |
| 6 | PPP1R12B   | uc001gya.2 | Missense_Mutation     | SNP | 37 |
| 6 | CEP250     | uc021wco.1 | Silent                | SNP | 37 |
| 6 | NLN        | uc003juf.3 | Missense_Mutation     | SNP | 37 |
| 6 | CHCHD2     | uc003tsa.3 | 5'UTR                 | SNP | 37 |
| 6 | MGA        | uc010ucy.2 | Silent                | SNP | 37 |
| 6 | COL6A5     | uc010htj.1 | Missense_Mutation     | SNP | 37 |
| 6 | PPFIA2     | uc001szo.2 | 3'UTR                 | SNP | 37 |
| 6 | CARD10     | uc003asv.1 | 5'UTR                 | SNP | 37 |
| 6 | C1orf9     | uc001giq.4 | 5'Flank               | SNP | 37 |
| 6 | UGGT2      | uc001vmt.3 | Missense_Mutation     | SNP | 37 |
| 6 | TFCP2L1    | uc002tmx.3 | Silent                | SNP | 37 |
| 6 | SLC6A11    | uc003bvz.3 | Silent                | SNP | 37 |
| 6 | CTU2       | uc010chz.3 | Missense_Mutation     | SNP | 37 |
| 6 | PCDHAC2    | uc003lhd.2 | Missense_Mutation     | SNP | 37 |
| 6 | APOB       | uc002red.3 | Nonsense_Mutation     | SNP | 37 |
| 6 | MAU2       | uc002nmk.4 | Missense_Mutation     | SNP | 37 |
| 6 | KRTAP10-7  | uc002zfn.4 | Missense_Mutation     | SNP | 37 |
| 6 | ZFP92      | uc011myo.2 | Missense_Mutation     | SNP | 37 |
| 6 | RXFP3      | uc003jic.2 | Missense_Mutation     | SNP | 37 |
| 6 | SETBP1     | uc010dni.3 | Missense_Mutation     | SNP | 37 |
| 6 | ZNF213     | uc010uws.2 | Missense_Mutation     | SNP | 37 |
| 6 | MOGAT3     | uc003uyc.3 | Missense_Mutation     | SNP | 37 |
| 6 | ZNF689     | uc002dyx.3 | Missense_Mutation     | SNP | 37 |
| 6 | KRT16P3    | uc002gxb.3 | Non-coding_Transcript | SNP | 37 |
| 6 | WDR96      | uc001kxw.3 | Silent                | SNP | 37 |
| 6 | SVEP1      | uc010mtz.3 | Missense_Mutation     | SNP | 37 |
| 6 | MYO3B      | uc002ufy.3 | Missense_Mutation     | SNP | 37 |
| 6 | MUC17      | uc003uxp.1 | Missense_Mutation     | SNP | 37 |
| 6 | SCN4B      | uc001pse.3 | 3'UTR                 | SNP | 37 |
| 6 | MUC16      | uc002mkp.3 | Missense_Mutation     | SNP | 37 |
| 6 | LY75-CD302 | uc002ubb.4 | Missense_Mutation     | SNP | 37 |
| 6 | PMF1-BGLAP | uc021pbc.1 | Silent                | SNP | 37 |
| 6 | SLC25A36   | uc003etr.2 | Missense_Mutation     | SNP | 37 |
| 6 | ARHGAP15   | uc002tvm.4 | Silent                | SNP | 37 |
| 6 | OR51A4     | uc010qys.2 | Missense_Mutation     | SNP | 37 |
| 6 | CATSPERD   | uc002mda.3 | Nonsense_Mutation     | SNP | 37 |
| 6 | C14orf184  | uc010aua.2 | Missense_Mutation     | SNP | 37 |
| 6 | TBCA       | uc003kfi.1 | 3'UTR                 | SNP | 37 |
| 6 | RACGAP1P   | uc001rol.3 | Non-coding_Transcript | SNP | 37 |
| 6 | ADAM33     | uc010zqh.1 | Silent                | SNP | 37 |
| 6 | TMPRSS13   | uc001prs.2 | Silent                | SNP | 37 |
| 6 | GRM2       | uc010hlv.3 | Silent                | SNP | 37 |

|   |             |            |                   |     |    |
|---|-------------|------------|-------------------|-----|----|
| 6 | DQ587284    | uc010xoy.2 | 5'Flank           | SNP | 37 |
| 6 | ADAMTS6     | uc003jtp.3 | Missense_Mutation | SNP | 37 |
| 6 | LILRB2      | uc002qfb.3 | 5'UTR             | SNP | 37 |
| 6 | ATP8A1      | uc003gwr.2 | Silent            | SNP | 37 |
| 6 | FAM123A     | uc001uqb.3 | Missense_Mutation | SNP | 37 |
| 6 | DNAH10      | uc001uft.4 | Missense_Mutation | SNP | 37 |
| 6 | NBEAL2      | uc003cqp.3 | Missense_Mutation | SNP | 37 |
| 6 | CSMD1       | uc022aqr.1 | Missense_Mutation | SNP | 37 |
| 6 | PGM3        | uc011dyz.2 | Nonsense_Mutation | SNP | 37 |
| 6 | CADPS2      | uc022akp.1 | Missense_Mutation | SNP | 37 |
| 6 | CACNA2D1    | uc003uhr.1 | Missense_Mutation | SNP | 37 |
| 6 | GPR133      | uc010tbm.2 | Missense_Mutation | SNP | 37 |
| 6 | RAB3IL1     | uc001nso.3 | Missense_Mutation | SNP | 37 |
| 6 | PPP1R16B    | uc002xje.3 | Silent            | SNP | 37 |
| 6 | CSF2        | uc003kwf.3 | 3'UTR             | SNP | 37 |
| 6 | ABCA10      | uc010dfa.1 | Splice_Site       | SNP | 37 |
| 6 | DNMBP       | uc001kqj.2 | Missense_Mutation | SNP | 37 |
| 6 | TOX2        | uc010ggo.3 | Nonsense_Mutation | SNP | 37 |
| 6 | TTN         | uc021vsy.1 | Missense_Mutation | SNP | 37 |
| 6 | LTBP2       | uc001xqa.3 | Missense_Mutation | SNP | 37 |
| 6 | CORO7-PAM16 | uc010btp.1 | 3'UTR             | SNP | 37 |
| 6 | CTNNA3      | uc009xpn.1 | Missense_Mutation | SNP | 37 |
| 6 | C18orf1     | uc002ksa.2 | Silent            | SNP | 37 |
| 6 | COL6A5      | uc010htj.1 | Missense_Mutation | SNP | 37 |
| 6 | HERC2       | uc001zbj.3 | Missense_Mutation | SNP | 37 |
| 6 | OAS3        | uc001tug.3 | Silent            | SNP | 37 |
| 6 | ID1         | uc002wwg.2 | 3'UTR             | SNP | 37 |
| 6 | SPANXN5     | uc004drc.1 | Missense_Mutation | SNP | 37 |
| 6 | TMPO        | uc001tfh.2 | Missense_Mutation | SNP | 37 |
| 6 | RPTOR       | uc002jyt.1 | Missense_Mutation | SNP | 37 |
| 6 | FLJ38723    | uc002ajj.1 | 3'UTR             | SNP | 37 |
| 6 | PLEKHO2     | uc002anv.3 | Missense_Mutation | SNP | 37 |
| 6 | FAM49A      | uc010exm.2 | Nonsense_Mutation | SNP | 37 |
| 6 | NLRP1       | uc002gci.3 | Silent            | SNP | 37 |
| 6 | PPM1H       | uc001srk.3 | Missense_Mutation | SNP | 37 |
| 6 | FREM1       | uc003zlm.3 | Missense_Mutation | SNP | 37 |
| 6 | FGFR2       | uc021pzy.1 | Silent            | SNP | 37 |
| 6 | OLFM3       | uc001duf.2 | Silent            | SNP | 37 |
| 6 | TTN         | uc002und.3 | 3'UTR             | SNP | 37 |
| 6 | UNC5D       | uc003xjr.2 | 3'UTR             | SNP | 37 |
| 6 | COL4A3      | uc002vom.2 | Splice_Site       | SNP | 37 |
| 6 | FLJ42280    | uc003uoh.1 | Missense_Mutation | SNP | 37 |
| 6 | DSCAM       | uc002yyq.1 | Missense_Mutation | SNP | 37 |

|   |          |            |                       |     |    |
|---|----------|------------|-----------------------|-----|----|
| 6 | HSPC072  | uc002wrg.2 | Non-coding_Transcript | SNP | 37 |
| 6 | NCKAP1L  | uc001sgc.4 | Missense_Mutation     | SNP | 37 |
| 6 | PPYR1    | uc001jee.3 | Missense_Mutation     | SNP | 37 |
| 6 | WDR64    | uc001hgz.2 | Missense_Mutation     | SNP | 37 |
| 6 | MUC16    | uc002mkp.3 | Silent                | SNP | 37 |
| 6 | ZFAND2B  | uc010zkt.2 | 3'UTR                 | SNP | 37 |
| 6 | TMCO1    | uc001gdj.4 | 5'UTR                 | SNP | 37 |
| 6 | DBF4B    | uc002ihf.3 | 3'UTR                 | SNP | 37 |
| 6 | RAPH1    | uc002vad.3 | Silent                | SNP | 37 |
| 6 | RDH8     | uc002mmr.3 | Splice_Site           | SNP | 37 |
| 6 | SIGLEC14 | uc002pxf.4 | Missense_Mutation     | SNP | 37 |
| 6 | SBF2     | uc001mih.4 | 3'UTR                 | SNP | 37 |
| 6 | DNAH11   | uc003svc.3 | Missense_Mutation     | SNP | 37 |
| 6 | CFL1     | uc001ofs.3 | 3'UTR                 | SNP | 37 |
| 6 | TACC2    | uc001lfv.3 | Missense_Mutation     | SNP | 37 |
| 6 | OPRK1    | uc003xrh.1 | Missense_Mutation     | SNP | 37 |
| 6 | PCSK1    | uc003kls.2 | 3'UTR                 | SNP | 37 |
| 6 | ANO4     | uc010svm.1 | Missense_Mutation     | SNP | 37 |
| 6 | ENO3     | uc010vsr.2 | 5'UTR                 | SNP | 37 |
| 6 | COL5A3   | uc002mmq.1 | Missense_Mutation     | SNP | 37 |
| 6 | AB231705 | uc001pli.1 | Missense_Mutation     | SNP | 37 |
| 6 | GPC1     | uc002vyw.4 | Splice_Site           | SNP | 37 |
| 6 | DENND5A  | uc001mhl.3 | Missense_Mutation     | SNP | 37 |
| 6 | PRUNE2   | uc010mpk.3 | Missense_Mutation     | SNP | 37 |
| 6 | MEOX1    | uc002idz.3 | Missense_Mutation     | SNP | 37 |
| 6 | HLA-DPA1 | uc010juk.3 | 3'UTR                 | SNP | 37 |
| 6 | MCF2L2   | uc003fli.1 | Silent                | SNP | 37 |
| 6 | ANK1     | uc003xom.3 | Missense_Mutation     | SNP | 37 |
| 6 | HEATR7B2 | uc003jnj.4 | Missense_Mutation     | SNP | 37 |
| 6 | PDIA3    | uc001zsu.3 | 5'Flank               | SNP | 37 |
| 6 | ZBTB42   | uc001ypp.3 | Missense_Mutation     | SNP | 37 |
| 6 | GRM7     | uc003bql.2 | Nonsense_Mutation     | SNP | 37 |
| 6 | ZNF215   | uc001mey.3 | 5'UTR                 | SNP | 37 |
| 6 | GALNTL1  | uc001xla.2 | 3'UTR                 | SNP | 37 |
| 6 | CHL1     | uc003bot.3 | Silent                | SNP | 37 |
| 6 | SERPINA6 | uc001ycv.3 | Missense_Mutation     | SNP | 37 |
| 6 | DST      | uc003pcy.4 | Missense_Mutation     | SNP | 37 |
| 6 | PPIP5K2  | uc003kod.4 | Missense_Mutation     | SNP | 37 |
| 6 | TDG      | uc001tkg.3 | Silent                | SNP | 37 |
| 6 | PLEKHB2  | uc002tsi.4 | Missense_Mutation     | SNP | 37 |
| 6 | NTRK3    | uc002bmg.3 | 3'UTR                 | SNP | 37 |
| 6 | DLG4     | uc002get.4 | Missense_Mutation     | SNP | 37 |
| 6 | KIR3DX1  | uc010yfa.1 | Splice_Site           | SNP | 37 |

|   |               |            |                   |     |    |
|---|---------------|------------|-------------------|-----|----|
| 6 | C19orf33      | uc002ohu.1 | Missense_Mutation | SNP | 37 |
| 6 | C1QTNF6       | uc003aqx.1 | Silent            | SNP | 37 |
| 6 | CNTN5         | uc001pfz.3 | 3'UTR             | SNP | 37 |
| 6 | IGF2BP3       | uc003swg.3 | Missense_Mutation | SNP | 37 |
| 6 | C10orf62      | uc001koa.3 | Silent            | SNP | 37 |
| 6 | SPON1         | uc001mle.3 | Missense_Mutation | SNP | 37 |
| 6 | DQ588439      | uc002byd.3 | Splice_Site       | SNP | 37 |
| 6 | GRIP2         | uc003byu.1 | 3'UTR             | SNP | 37 |
| 6 | OR52M1        | uc010qyf.2 | Missense_Mutation | SNP | 37 |
| 6 | KRT15         | uc002hxb.1 | 3'UTR             | SNP | 37 |
| 6 | AASDHPPT      | uc001pj.1  | Missense_Mutation | SNP | 37 |
| 6 | HAL           | uc001tem.1 | Silent            | SNP | 37 |
| 6 | RET           | uc001jal.3 | Missense_Mutation | SNP | 37 |
| 6 | GLTSCR1       | uc002phh.4 | Silent            | SNP | 37 |
| 6 | EIF5A2        | uc003fhd.3 | 3'UTR             | SNP | 37 |
| 6 | FLT3          | uc001urw.3 | Nonsense_Mutation | SNP | 37 |
| 6 | NCKAP1        | uc002upb.3 | Silent            | SNP | 37 |
| 6 | KRT15         | uc002hxb.1 | 3'UTR             | SNP | 37 |
| 6 | HINFP         | uc001pvp.3 | Nonsense_Mutation | SNP | 37 |
| 6 | Em:AC008101.5 | uc002zns.3 | Silent            | SNP | 37 |
| 6 | MPHOSPH8      | uc001umg.3 | Missense_Mutation | SNP | 37 |
| 6 | BAIAP3        | uc002clk.2 | Silent            | SNP | 37 |
| 6 | LRP2          | uc002ues.3 | Silent            | SNP | 37 |
| 6 | KRTAP27-1     | uc002ynx.1 | Silent            | SNP | 37 |
| 6 | OTUD7A        | uc001zfr.3 | Missense_Mutation | SNP | 37 |
| 6 | NUP210        | uc003bxv.1 | Silent            | SNP | 37 |
| 6 | YSK4          | uc002tue.1 | Missense_Mutation | SNP | 37 |
| 6 | ZNF529        | uc010xth.2 | Intron            | SNP | 37 |
| 6 | NRIP1         | uc002yjk.2 | Nonsense_Mutation | SNP | 37 |
| 6 | KRT80         | uc001rzw.3 | Silent            | SNP | 37 |
| 6 | OR1F1         | uc010uwu.2 | Missense_Mutation | SNP | 37 |
| 6 | EFCAB6        | uc003bdy.2 | Silent            | SNP | 37 |
| 6 | KLK12         | uc010yca.1 | Missense_Mutation | SNP | 37 |
| 6 | SERPINB5      | uc002liz.4 | Missense_Mutation | SNP | 37 |
| 6 | HDAC9         | uc003sui.3 | Missense_Mutation | SNP | 37 |
| 6 | LOC641298     | uc010bxf.3 | 5'Flank           | SNP | 37 |
| 6 | SPON1         | uc001mle.3 | Missense_Mutation | SNP | 37 |
| 6 | SLC17A2       | uc011dkb.2 | Silent            | SNP | 37 |
| 6 | SPINK5        | uc003loy.2 | Splice_Site       | SNP | 37 |
| 6 | IFT81         | uc001tqi.3 | Silent            | SNP | 37 |
| 6 | LAMB4         | uc010ljo.1 | 3'UTR             | SNP | 37 |
| 6 | RHBDD3        | uc003aeq.1 | Missense_Mutation | SNP | 37 |
| 6 | OR51L1        | uc010qyu.2 | Missense_Mutation | SNP | 37 |

|   |              |            |                       |     |    |
|---|--------------|------------|-----------------------|-----|----|
| 6 | Unknown      |            | IGR                   | SNP | 37 |
| 6 | ARHGEF5      | uc003wel.3 | 3'UTR                 | SNP | 37 |
| 6 | TNK1         | uc002ggi.4 | Missense_Mutation     | SNP | 37 |
| 6 | USP36        | uc002jvz.1 | Missense_Mutation     | SNP | 37 |
| 6 | KHSRP        | uc002mer.4 | 3'UTR                 | SNP | 37 |
| 6 | MPRIP        | uc002gqy.2 | Silent                | SNP | 37 |
| 6 | FCRL5        | uc009wsm.3 | Missense_Mutation     | SNP | 37 |
| 6 | LY75-CD302   | uc002ubb.4 | Nonsense_Mutation     | SNP | 37 |
| 6 | TET1         | uc001jok.4 | Missense_Mutation     | SNP | 37 |
| 6 | FAM75A7      | uc004adx.4 | Nonsense_Mutation     | SNP | 37 |
| 6 | SOGA2        | uc002knr.2 | Missense_Mutation     | SNP | 37 |
| 6 | C21orf58     | uc002zjf.3 | Silent                | SNP | 37 |
| 6 | TMEM66       | uc003xhs.3 | Silent                | SNP | 37 |
| 6 | LRR37A3      | uc002jex.1 | 5'UTR                 | SNP | 37 |
| 6 | USP2         | uc001pwm.4 | Missense_Mutation     | SNP | 37 |
| 6 | LOC100124692 | uc003vxa.2 | Non-coding_Transcript | SNP | 37 |
| 6 | C9orf84      | uc004bfr.3 | Missense_Mutation     | SNP | 37 |
| 6 | OR4E2        | uc010tmd.2 | Silent                | SNP | 37 |
| 6 | CNTNAP2      | uc003weu.2 | Intron                | SNP | 37 |
| 6 | SERPINB3     | uc002ljf.3 | Missense_Mutation     | SNP | 37 |
| 6 | ANGEL2       | uc010pto.2 | 5'UTR                 | SNP | 37 |
| 6 | OSGIN1       | uc002fha.3 | Silent                | SNP | 37 |
| 6 | KCNA5        | uc001qni.3 | Missense_Mutation     | SNP | 37 |
| 6 | CBR4         | uc003iry.3 | 5'UTR                 | SNP | 37 |
| 6 | TRIM6-TRIM34 | uc001mbf.3 | 5'UTR                 | SNP | 37 |
| 6 | EMB          | uc003jom.3 | Nonsense_Mutation     | SNP | 37 |
| 6 | CATSPERB     | uc001xzs.1 | Silent                | SNP | 37 |
| 6 | AK127124     | uc002try.1 | 5'UTR                 | SNP | 37 |
| 6 | PCNX         | uc001xmo.2 | Missense_Mutation     | SNP | 37 |
| 6 | IQCH         | uc002aqo.2 | Splice_Site           | SNP | 37 |
| 6 | PDGFD        | uc001phq.3 | Silent                | SNP | 37 |
| 6 | TMEM200C     | uc002kmx.1 | Missense_Mutation     | SNP | 37 |
| 6 | UNC5D        | uc003xjr.2 | Missense_Mutation     | SNP | 37 |
| 6 | CFHR2        | uc001gtq.1 | Missense_Mutation     | SNP | 37 |
| 6 | ZNF613       | uc002pxz.2 | Silent                | SNP | 37 |
| 6 | NYNRIN       | uc001wpf.4 | Missense_Mutation     | SNP | 37 |
| 6 | NF1          | uc002hgg.3 | Nonsense_Mutation     | SNP | 37 |
| 6 | ZNF117       | uc003ttr.2 | Missense_Mutation     | SNP | 37 |
| 6 | LRRN2        | uc001hbe.1 | 5'UTR                 | SNP | 37 |
| 6 | CXCR1        | uc002vhc.3 | Missense_Mutation     | SNP | 37 |
| 6 | TTC24        | uc021pbf.1 | Missense_Mutation     | SNP | 37 |
| 6 | SLC47A1      | uc010vzc.1 | 5'UTR                 | SNP | 37 |
| 6 | LILRB1       | uc002qgm.3 | Silent                | SNP | 37 |

|   |              |            |                       |     |    |
|---|--------------|------------|-----------------------|-----|----|
| 6 | OR9K2        | uc010spe.2 | Missense_Mutation     | SNP | 37 |
| 6 | DNAH5        | uc003jfd.2 | Silent                | SNP | 37 |
| 6 | HDAC9        | uc003sui.3 | Missense_Mutation     | SNP | 37 |
| 6 | ARHGEF1      | uc002osa.3 | Nonsense_Mutation     | SNP | 37 |
| 6 | LPHN2        | uc001dit.4 | Missense_Mutation     | SNP | 37 |
| 6 | MAP1B        | uc003kbw.4 | Missense_Mutation     | SNP | 37 |
| 6 | DPY19L2P2    | uc003vbh.4 | Intron                | SNP | 37 |
| 6 | ZNF785       | uc002dyu.3 | Splice_Site           | SNP | 37 |
| 6 | BRAT1        | uc003smi.3 | Silent                | SNP | 37 |
| 6 | ALMS1        | uc002sje.1 | Silent                | SNP | 37 |
| 6 | TTN          | uc021vsy.1 | Silent                | SNP | 37 |
| 6 | HIST3H2A     | uc001hsy.3 | Silent                | SNP | 37 |
| 6 | SCN2A        | uc002udc.3 | Missense_Mutation     | SNP | 37 |
| 6 | NLRP4        | uc002qmd.4 | Silent                | SNP | 37 |
| 6 | MIR1275      | uc021yrr.1 | Non-coding_Transcript | SNP | 37 |
| 6 | MGAM         | uc003vwy.3 | Missense_Mutation     | SNP | 37 |
| 6 | CTAGE11P     | uc010ths.2 | Missense_Mutation     | SNP | 37 |
| 6 | PODXL2       | uc003ejq.2 | Missense_Mutation     | SNP | 37 |
| 6 | CRB1         | uc001gtz.3 | Silent                | SNP | 37 |
| 6 | RYR2         | uc001hyl.1 | Missense_Mutation     | SNP | 37 |
| 6 | TYK2         | uc002moc.4 | Missense_Mutation     | SNP | 37 |
| 6 | ZNF585B      | uc002ofq.3 | Missense_Mutation     | SNP | 37 |
| 6 | PACS1        | uc001ogz.1 | 3'UTR                 | SNP | 37 |
| 6 | CNTNAP2      | uc003weu.2 | Missense_Mutation     | SNP | 37 |
| 6 | ELP2         | uc010xcg.2 | Missense_Mutation     | SNP | 37 |
| 6 | ODZ4         | uc001ozl.4 | Missense_Mutation     | SNP | 37 |
| 6 | ZNF528       | uc002pzh.3 | Nonsense_Mutation     | SNP | 37 |
| 6 | USP8         | uc001zyp.4 | 5'UTR                 | SNP | 37 |
| 6 | ZNF541       | uc010xyt.2 | Missense_Mutation     | SNP | 37 |
| 6 | SGK196       | uc003xpw.2 | Silent                | SNP | 37 |
| 6 | TOMM40       | uc002paa.4 | 3'UTR                 | SNP | 37 |
| 6 | SLC16A7      | uc001sqz.3 | Missense_Mutation     | SNP | 37 |
| 6 | LOC100132146 | uc003cpw.1 | 3'UTR                 | SNP | 37 |
| 6 | ADCK3        | uc001hqm.1 | Silent                | SNP | 37 |
| 6 | GPRIN2       | uc001jec.3 | Silent                | SNP | 37 |
| 6 | ATR          | uc003eux.4 | Missense_Mutation     | SNP | 37 |
| 6 | LAMA1        | uc002knm.3 | Silent                | SNP | 37 |
| 6 | PPP1R13L     | uc002pbn.3 | Silent                | SNP | 37 |
| 6 | LOC150776    | uc010fna.3 | Silent                | SNP | 37 |
| 6 | GP1BA        | uc021tnz.1 | 3'UTR                 | SNP | 37 |
| 6 | COL8A1       | uc003dti.1 | Missense_Mutation     | SNP | 37 |
| 6 | LOC550112    | uc003hdk.3 | 3'UTR                 | SNP | 37 |
| 6 | AXDND1       | uc001gmo.3 | Missense_Mutation     | SNP | 37 |

|   |              |            |                       |     |    |
|---|--------------|------------|-----------------------|-----|----|
| 6 | FUT5         | uc010duo.3 | Missense_Mutation     | SNP | 37 |
| 6 | GSDMA        | uc002htl.1 | Missense_Mutation     | SNP | 37 |
| 6 | SCN5A        | uc021wvo.1 | Missense_Mutation     | SNP | 37 |
| 6 | O3FAR1       | uc010qnt.2 | Silent                | SNP | 37 |
| 6 | ZBED4        | uc003bix.2 | Silent                | SNP | 37 |
| 6 | CASKIN2      | uc002joc.3 | Missense_Mutation     | SNP | 37 |
| 6 | MLH1         | uc003cgl.3 | Splice_Site           | SNP | 37 |
| 6 | TRIM22       | uc001mbr.3 | Missense_Mutation     | SNP | 37 |
| 6 | PDZD2        | uc003jhl.3 | Missense_Mutation     | SNP | 37 |
| 6 | TSIX         | uc004ebn.2 | Non-coding_Transcript | SNP | 37 |
| 6 | CRHR2        | uc010kvw.2 | Silent                | SNP | 37 |
| 6 | DYTN         | uc002vbr.1 | Silent                | SNP | 37 |
| 6 | CABS1        | uc003hff.3 | Missense_Mutation     | SNP | 37 |
| 6 | FAM181B      | uc001ozp.3 | Silent                | SNP | 37 |
| 6 | EZH2         | uc003wfb.2 | Silent                | SNP | 37 |
| 6 | TMEM63C      | uc001xtf.2 | Silent                | SNP | 37 |
| 6 | C12orf12     | uc001tbj.3 | Silent                | SNP | 37 |
| 6 | DNAH14       | uc001hov.4 | 3'UTR                 | SNP | 37 |
| 6 | NEK5         | uc001vge.3 | Missense_Mutation     | SNP | 37 |
| 6 | ABCC6P1      | uc002dfg.3 | Nonsense_Mutation     | SNP | 37 |
| 6 | COBRA1       | uc004cmm.4 | 3'UTR                 | SNP | 37 |
| 6 | TTN          | uc002unb.2 | Missense_Mutation     | SNP | 37 |
| 6 | DYM          | uc002ldi.1 | Silent                | SNP | 37 |
| 6 | MAP1LC3B2    | uc009zwk.1 | Missense_Mutation     | SNP | 37 |
| 6 | PSG8         | uc002ouo.2 | Missense_Mutation     | SNP | 37 |
| 6 | PHRF1        | uc001lqe.3 | Silent                | SNP | 37 |
| 6 | SRCAP        | uc002dze.1 | Silent                | SNP | 37 |
| 6 | KRTAP10-7    | uc002zfn.4 | Missense_Mutation     | SNP | 37 |
| 6 | OR9G9        | uc010rjn.2 | Missense_Mutation     | SNP | 37 |
| 6 | AX746654     | uc002wly.1 | Missense_Mutation     | SNP | 37 |
| 6 | GPR110       | uc003oyt.3 | Missense_Mutation     | SNP | 37 |
| 6 | LOC100509575 | uc022bvt.1 | Non-coding_Transcript | SNP | 37 |
| 6 | C1orf227     | uc001hjq.3 | Missense_Mutation     | SNP | 37 |
| 6 | KIAA1199     | uc002bfw.1 | Splice_Site           | SNP | 37 |
| 6 | ZP1          | uc001nqd.3 | Silent                | SNP | 37 |
| 6 | PLXDC1       | uc002hrg.2 | Silent                | SNP | 37 |
| 6 | CXorf21      | uc004dcg.2 | Missense_Mutation     | SNP | 37 |
| 6 | MYBPC1       | uc010svs.2 | Silent                | SNP | 37 |
| 6 | DNAH8        | uc021yzh.1 | Nonsense_Mutation     | SNP | 37 |
| 6 | FAM212B      | uc001ebo.2 | Missense_Mutation     | SNP | 37 |
| 6 | OVCH1        | uc001rix.1 | Nonsense_Mutation     | SNP | 37 |
| 6 | SLC35G5      | uc003wtp.1 | Silent                | SNP | 37 |
| 6 | EDAR         | uc010fjn.3 | Missense_Mutation     | SNP | 37 |

|   |          |            |                   |     |    |
|---|----------|------------|-------------------|-----|----|
| 6 | TFEC     | uc003vhj.2 | Silent            | SNP | 37 |
| 6 | CDC42EP4 | uc002jjn.3 | 5'UTR             | SNP | 37 |
| 6 | PLIN5    | uc002mas.3 | Missense_Mutation | SNP | 37 |
| 6 | KIAA0913 | uc001jvj.3 | Silent            | SNP | 37 |
| 6 | SLIT3    | uc010jgg.3 | Missense_Mutation | SNP | 37 |
| 6 | ZHX3     | uc002xjr.1 | Missense_Mutation | SNP | 37 |
| 6 | ST5      | uc001mgt.3 | Missense_Mutation | SNP | 37 |
| 6 | MRPS7    | uc002jnm.4 | 5'UTR             | SNP | 37 |
| 6 | MPP3     | uc002ieh.3 | Missense_Mutation | SNP | 37 |
| 6 | UBQLN3   | uc001may.1 | Silent            | SNP | 37 |
| 6 | PXDNL    | uc003xqu.4 | Silent            | SNP | 37 |
| 6 | AGAP3    | uc003wjg.1 | Missense_Mutation | SNP | 37 |
| 6 | ACSM2A   | uc010bwe.3 | Missense_Mutation | SNP | 37 |
| 6 | IL6ST    | uc003jqj.3 | Missense_Mutation | SNP | 37 |
| 6 | ARID2    | uc001ros.1 | Nonsense_Mutation | SNP | 37 |
| 6 | CCDC57   | uc002kdy.3 | Silent            | SNP | 37 |
| 6 | RASSF10  | uc021qdz.1 | Missense_Mutation | SNP | 37 |
| 6 | ARMC9    | uc002vrq.4 | Missense_Mutation | SNP | 37 |
| 6 | BPIFB2   | uc002wyj.3 | Silent            | SNP | 37 |
| 6 | OR4N3P   | uc001yuf.3 | Missense_Mutation | SNP | 37 |
| 6 | POU2F3   | uc021qrk.1 | Silent            | SNP | 37 |
| 6 | BCMO1    | uc002fgn.1 | Missense_Mutation | SNP | 37 |
| 6 | MDC1     | uc003nrg.4 | Missense_Mutation | SNP | 37 |
| 6 | MBP      | uc002lmr.3 | Splice_Site       | SNP | 37 |
| 6 | SLC6A13  | uc001qic.2 | Missense_Mutation | SNP | 37 |
| 6 | NTF3     | uc001qnk.4 | Silent            | SNP | 37 |
| 6 | B4GALT4  | uc003ecg.3 | Missense_Mutation | SNP | 37 |
| 6 | GALM     | uc002rqy.3 | Missense_Mutation | SNP | 37 |
| 6 | CFTR     | uc003vjd.3 | Missense_Mutation | SNP | 37 |
| 6 | HOXC5    | uc001sew.3 | 3'UTR             | SNP | 37 |
| 6 | C15orf52 | uc001zlh.4 | Missense_Mutation | SNP | 37 |
| 6 | IL1RL2   | uc002tbs.3 | Nonsense_Mutation | SNP | 37 |
| 6 | abParts  | uc021ser.1 | Splice_Site       | SNP | 37 |
| 6 | PPP1R9A  | uc010lfj.3 | Silent            | SNP | 37 |
| 6 | SCN3B    | uc001pza.1 | Silent            | SNP | 37 |
| 6 | ZNF777   | uc003wfv.3 | Splice_Site       | SNP | 37 |
| 6 | KLF17    | uc001clp.3 | Silent            | SNP | 37 |
| 6 | HS3ST3A1 | uc002gob.1 | Silent            | SNP | 37 |
| 6 | TPH2     | uc009zrw.1 | Silent            | SNP | 37 |
| 6 | SLC6A13  | uc001qic.2 | Silent            | SNP | 37 |
| 6 | GALR2    | uc002jqm.1 | Missense_Mutation | SNP | 37 |
| 6 | EYA2     | uc002xsm.3 | Missense_Mutation | SNP | 37 |
| 6 | ERBB2IP  | uc011cqx.2 | Missense_Mutation | SNP | 37 |



|   |              |            |                       |     |    |
|---|--------------|------------|-----------------------|-----|----|
| 6 | PRIM2        | uc003pdx.3 | Silent                | SNP | 37 |
| 6 | SLC2A4RG     | uc002ygg.3 | Missense_Mutation     | SNP | 37 |
| 6 | MDC1         | uc003nrg.4 | Missense_Mutation     | SNP | 37 |
| 6 | TRIM6-TRIM34 | uc001mbf.3 | Missense_Mutation     | SNP | 37 |
| 6 | NLGN4Y       | uc011nas.1 | Splice_Site           | SNP | 37 |
| 6 | FAM174B      | uc010boe.3 | 3'UTR                 | SNP | 37 |
| 6 | ZDHHC2       | uc003wxe.3 | Missense_Mutation     | SNP | 37 |
| 6 | CNTNAP5      | uc010flu.3 | Missense_Mutation     | SNP | 37 |
| 6 | ANKRD20A2    | uc010fhp.3 | Non-coding_Transcript | SNP | 37 |
| 6 | DEPDC5       | uc011alu.2 | Missense_Mutation     | SNP | 37 |
| 6 | XIRP2        | uc002udx.3 | Silent                | SNP | 37 |
| 6 | OR5H15       | uc011bgu.2 | Missense_Mutation     | SNP | 37 |
| 6 | PTPRG        | uc003dlb.3 | Intron                | SNP | 37 |
| 6 | LRP1B        | uc002tvj.1 | Silent                | SNP | 37 |
| 6 | WWC2         | uc010irx.3 | Silent                | SNP | 37 |
| 6 | ABT1         | uc003nii.3 | Silent                | SNP | 37 |
| 6 | TTN          | uc021vsy.1 | Silent                | SNP | 37 |
| 6 | OR2T1        | uc010pzm.2 | Silent                | SNP | 37 |
| 6 | KRT17        | uc010wft.2 | 3'UTR                 | SNP | 37 |
| 6 | DECR1        | uc003yek.1 | 5'UTR                 | SNP | 37 |
| 6 | C17orf28     | uc002jmi.3 | 5'UTR                 | SNP | 37 |
| 6 | LOC440041    | uc021qjb.1 | Non-coding_Transcript | SNP | 37 |
| 6 | SND1         | uc003vmi.3 | Intron                | SNP | 37 |
| 6 | HPCAL4       | uc001cdr.3 | Missense_Mutation     | SNP | 37 |
| 6 | TSPAN32      | uc001lwd.1 | 5'UTR                 | SNP | 37 |
| 6 | UBE2M        | uc002qtl.4 | 5'UTR                 | SNP | 37 |
| 6 | DCHS2        | uc003inw.2 | Missense_Mutation     | SNP | 37 |
| 6 | SLC6A18      | uc003jby.2 | Missense_Mutation     | SNP | 37 |
| 6 | RBM11        | uc002yjo.4 | Missense_Mutation     | SNP | 37 |
| 6 | CHRNA2       | uc010lur.3 | Missense_Mutation     | SNP | 37 |
| 6 | LILRB3       | uc010erh.1 | Missense_Mutation     | SNP | 37 |
| 6 | PLAT         | uc003xos.2 | Nonsense_Mutation     | SNP | 37 |
| 6 | DCAF8L1      | uc004dbx.1 | 5'UTR                 | SNP | 37 |
| 6 | ZNF274       | uc002qrq.1 | Missense_Mutation     | SNP | 37 |
| 6 | POLK         | uc003kdw.3 | Missense_Mutation     | SNP | 37 |
| 6 | POLR3G       | uc003kjq.3 | Missense_Mutation     | SNP | 37 |
| 6 | LHX9         | uc001guk.1 | Missense_Mutation     | SNP | 37 |
| 6 | MFI2         | uc003fxk.4 | Intron                | SNP | 37 |
| 6 | AFF2         | uc004fcp.3 | Missense_Mutation     | SNP | 37 |
| 6 | LCK          | uc001buz.3 | Missense_Mutation     | SNP | 37 |
| 6 | TMPRSS5      | uc001poc.4 | Missense_Mutation     | SNP | 37 |
| 6 | SOX7         | uc003wtf.3 | Missense_Mutation     | SNP | 37 |
| 6 | PHRF1        | uc001lqe.3 | Missense_Mutation     | SNP | 37 |

|   |              |            |                   |     |    |
|---|--------------|------------|-------------------|-----|----|
| 6 | NRG1         | uc003xiy.3 | Missense_Mutation | SNP | 37 |
| 6 | OR10A6       | uc010rbh.2 | Missense_Mutation | SNP | 37 |
| 6 | FAM110C      | uc010yim.2 | Missense_Mutation | SNP | 37 |
| 6 | SGK2         | uc002xkv.3 | Missense_Mutation | SNP | 37 |
| 6 | TTC39A       | uc001cso.1 | 3'UTR             | SNP | 37 |
| 6 | ESRRB        | uc001xsr.3 | Intron            | SNP | 37 |
| 6 | TRIM6-TRIM34 | uc009yep.1 | Silent            | SNP | 37 |
| 6 | TDG          | uc001tkg.3 | Missense_Mutation | SNP | 37 |
| 6 | KANSL1       | uc002ikc.3 | Missense_Mutation | SNP | 37 |
| 6 | CD80         | uc003ecq.3 | Missense_Mutation | SNP | 37 |
| 6 | C16orf53     | uc002dug.4 | Silent            | SNP | 37 |
| 6 | PIK3R1       | uc003jva.3 | Splice_Site       | SNP | 37 |
| 6 | EMB          | uc003jom.3 | Missense_Mutation | SNP | 37 |
| 6 | CCDC60       | uc001txe.3 | Silent            | SNP | 37 |
| 6 | MYLK         | uc010hrs.1 | Nonsense_Mutation | SNP | 37 |
| 6 | LTBP2        | uc001xqa.3 | Missense_Mutation | SNP | 37 |
| 6 | PTPRD        | uc003zkk.3 | 5'UTR             | SNP | 37 |
| 6 | LRRCC1       | uc003ycw.3 | Nonsense_Mutation | SNP | 37 |
| 6 | NLRC5        | uc021tiu.1 | Silent            | SNP | 37 |
| 6 | NEFM         | uc003xed.4 | Missense_Mutation | SNP | 37 |
| 6 | MMP24        | uc002xbu.2 | Missense_Mutation | SNP | 37 |
| 6 | TAS2R7       | uc001qyv.3 | Missense_Mutation | SNP | 37 |
| 6 | MUC16        | uc002mkp.3 | Missense_Mutation | SNP | 37 |
| 6 | C10orf12     | uc001kmv.3 | Missense_Mutation | SNP | 37 |
| 6 | ZNF711       | uc004eeq.3 | Missense_Mutation | SNP | 37 |
| 6 | SMAP2        | uc001cfj.3 | Missense_Mutation | SNP | 37 |
| 6 | FGFR1OP2     | uc001rhm.3 | Missense_Mutation | SNP | 37 |
| 6 | SDK1         | uc003smx.3 | Missense_Mutation | SNP | 37 |
| 6 | DCD          | uc009znt.3 | Missense_Mutation | SNP | 37 |
| 6 | COL6A3       | uc002vwl.2 | Silent            | SNP | 37 |
| 6 | TUSC3        | uc003wwt.3 | Missense_Mutation | SNP | 37 |
| 6 | CDH10        | uc003jgr.2 | Silent            | SNP | 37 |
| 6 | SNORD114-16  | uc001yjj.3 | 5'Flank           | SNP | 37 |
| 6 | ARHGEF3      | uc003dih.2 | Silent            | SNP | 37 |
| 6 | FLG          | uc001ezu.1 | Missense_Mutation | SNP | 37 |
| 6 | TMEM131      | uc002syh.4 | Missense_Mutation | SNP | 37 |
| 6 | CGNL1        | uc010bfb.3 | Missense_Mutation | SNP | 37 |
| 6 | NLGN4Y       | uc011nas.1 | 3'UTR             | SNP | 37 |
| 6 | XKR4         | uc003xsf.3 | Missense_Mutation | SNP | 37 |
| 6 | H19          | uc021qbx.1 | 5'Flank           | SNP | 37 |
| 6 | RREB1        | uc003mxb.3 | Nonsense_Mutation | SNP | 37 |
| 6 | HDC          | uc001zxz.3 | Silent            | SNP | 37 |
| 6 | PAXIP1       | uc022aaq.1 | Missense_Mutation | SNP | 37 |

|   |          |            |                   |     |    |
|---|----------|------------|-------------------|-----|----|
| 6 | KIFC2    | uc003zcz.3 | 3'UTR             | SNP | 37 |
| 6 | MAP3K14  | uc002iiw.1 | Silent            | SNP | 37 |
| 6 | TRHDE    | uc001sxa.3 | Missense_Mutation | SNP | 37 |
| 6 | ATF2     | uc002ujl.3 | Missense_Mutation | SNP | 37 |
| 6 | CDC37    | uc002mof.1 | 5'UTR             | SNP | 37 |
| 6 | ALPK3    | uc002ble.3 | Missense_Mutation | SNP | 37 |
| 6 | AAK1     | uc002sfp.2 | 3'UTR             | SNP | 37 |
| 6 | WDR52    | uc003ead.2 | Missense_Mutation | SNP | 37 |
| 6 | FAM53C   | uc011cyr.2 | Missense_Mutation | SNP | 37 |
| 6 | CDK8     | uc001uqr.1 | Silent            | SNP | 37 |
| 6 | LAMB3    | uc001hhg.3 | Silent            | SNP | 37 |
| 6 | FAM185A  | uc011klf.2 | Missense_Mutation | SNP | 37 |
| 6 | ESRRG    | uc001hxx.2 | Silent            | SNP | 37 |
| 6 | TTN      | uc021vsy.1 | Missense_Mutation | SNP | 37 |
| 6 | DNAH5    | uc003jfd.2 | Silent            | SNP | 37 |
| 6 | PDE3B    | uc001mln.3 | Missense_Mutation | SNP | 37 |
| 6 | SOGA2    | uc002knr.2 | Missense_Mutation | SNP | 37 |
| 6 | TMEM132E | uc002hif.3 | Silent            | SNP | 37 |
| 6 | KIAA1328 | uc002kzz.3 | 3'UTR             | SNP | 37 |
| 6 | MAP1B    | uc003kbw.4 | Missense_Mutation | SNP | 37 |
| 6 | SLC38A1  | uc009zjk.1 | Missense_Mutation | SNP | 37 |
| 6 | DGKH     | uc001uyl.2 | Missense_Mutation | SNP | 37 |
| 6 | ISOC1    | uc003kva.3 | Missense_Mutation | SNP | 37 |
| 6 | GCC2     | uc002tec.3 | 5'UTR             | SNP | 37 |
| 6 | INTS1    | uc003skn.2 | 5'Flank           | SNP | 37 |
| 6 | GRIA3    | uc004etr.4 | Missense_Mutation | SNP | 37 |
| 6 | C3orf17  | uc003dzt.3 | Missense_Mutation | SNP | 37 |
| 6 | SRGAP1   | uc010ssp.1 | Missense_Mutation | SNP | 37 |
| 6 | NPSR1    | uc003teh.1 | Silent            | SNP | 37 |
| 6 | TP53I11  | uc001myi.3 | 5'UTR             | SNP | 37 |
| 6 | WDR69    | uc002vpn.1 | Missense_Mutation | SNP | 37 |
| 6 | TEKT5    | uc002czz.1 | Missense_Mutation | SNP | 37 |
| 6 | GBP3     | uc010oss.2 | 5'UTR             | SNP | 37 |
| 6 | KCND2    | uc003vjj.1 | 5'UTR             | SNP | 37 |
| 6 | AIPL1    | uc002gcp.3 | Missense_Mutation | SNP | 37 |
| 6 | NCOA2    | uc003xyn.1 | Missense_Mutation | SNP | 37 |
| 6 | ZBTB16   | uc001pop.3 | Silent            | SNP | 37 |
| 6 | GALNT13  | uc010foc.1 | 5'UTR             | SNP | 37 |
| 6 | WBSCR22  | uc003tyv.3 | 5'UTR             | SNP | 37 |
| 6 | DSP      | uc003mxx.1 | Missense_Mutation | SNP | 37 |
| 6 | MUC16    | uc002mkp.3 | Missense_Mutation | SNP | 37 |
| 6 | HMGB4    | uc001bxx.3 | Missense_Mutation | SNP | 37 |
| 6 | PLCZ1    | uc021qvx.1 | Silent            | SNP | 37 |

|   |           |            |                       |     |    |
|---|-----------|------------|-----------------------|-----|----|
| 6 | GSDMC     | uc003ysr.3 | Silent                | SNP | 37 |
| 6 | OAS2      | uc001tuj.3 | Nonsense_Mutation     | SNP | 37 |
| 6 | C11orf92  | uc001pld.3 | Non-coding_Transcript | SNP | 37 |
| 6 | ABCC4     | uc001vmd.4 | Silent                | SNP | 37 |
| 6 | SAMD4A    | uc001xbb.3 | 3'UTR                 | SNP | 37 |
| 6 | FUT2      | uc002pke.4 | Missense_Mutation     | SNP | 37 |
| 6 | ICK       | uc003pbh.2 | Missense_Mutation     | SNP | 37 |
| 6 | OR9G4     | uc010rjo.2 | Silent                | SNP | 37 |
| 6 | PSG7      | uc002ovl.4 | 3'UTR                 | SNP | 37 |
| 6 | SLC9A2    | uc002tca.3 | Silent                | SNP | 37 |
| 6 | MGAT4B    | uc003mkr.3 | Missense_Mutation     | SNP | 37 |
| 6 | NID2      | uc001wzo.3 | Nonsense_Mutation     | SNP | 37 |
| 6 | ABCA13    | uc003toq.2 | Silent                | SNP | 37 |
| 6 | PPFIA2    | uc001szo.2 | Missense_Mutation     | SNP | 37 |
| 6 | KIAA0430  | uc002ddr.3 | Silent                | SNP | 37 |
| 6 | LINGO1    | uc002bct.1 | Splice_Site           | SNP | 37 |
| 6 | CACNA1F   | uc004dnb.3 | Silent                | SNP | 37 |
| 6 | PLAC1L    | uc001nol.3 | Silent                | SNP | 37 |
| 6 | MYO7A     | uc001oyb.2 | Missense_Mutation     | SNP | 37 |
| 6 | PLCE1     | uc001kjk.3 | Missense_Mutation     | SNP | 37 |
| 6 | PATE1     | uc001qct.3 | 3'UTR                 | SNP | 37 |
| 6 | TAGAP     | uc003qzr.3 | Missense_Mutation     | SNP | 37 |
| 6 | OR8K1     | uc010rjg.2 | Silent                | SNP | 37 |
| 6 | CCDC53    | uc010svw.2 | 5'UTR                 | SNP | 37 |
| 6 | ADC       | uc009vug.3 | Silent                | SNP | 37 |
| 6 | CSMD3     | uc003ynt.3 | Silent                | SNP | 37 |
| 6 | TNFRSF13B | uc002gqs.1 | Intron                | SNP | 37 |
| 6 | SUSD2     | uc002zzn.1 | Missense_Mutation     | SNP | 37 |
| 6 | ACVRL1    | uc001rzj.3 | Silent                | SNP | 37 |
| 6 | AK310441  | uc009wkv.1 | Non-coding_Transcript | SNP | 37 |
| 6 | IRF2BPL   | uc001xsy.3 | Missense_Mutation     | SNP | 37 |
| 6 | C16orf74  | uc002fjc.4 | 3'UTR                 | SNP | 37 |
| 6 | ALDH1A1   | uc004ajd.3 | Silent                | SNP | 37 |
| 6 | NR1H4     | uc001tht.2 | Silent                | SNP | 37 |
| 6 | AMH       | uc002lvh.2 | Missense_Mutation     | SNP | 37 |
| 6 | GRIN2B    | uc001rbt.2 | Splice_Site           | SNP | 37 |
| 6 | NUBPL     | uc001wrk.4 | Missense_Mutation     | SNP | 37 |
| 6 | OBSCN     | uc009xez.1 | Missense_Mutation     | SNP | 37 |
| 6 | CSAG1     | uc004fge.3 | 3'UTR                 | SNP | 37 |
| 6 | CRY2      | uc010rgn.2 | Silent                | SNP | 37 |
| 6 | CAST      | uc011cuo.1 | Intron                | SNP | 37 |
| 6 | CCDC168   | uc001vpm.3 | Silent                | SNP | 37 |
| 6 | ZNF423    | uc002efs.3 | Missense_Mutation     | SNP | 37 |

|   |           |            |                   |     |    |
|---|-----------|------------|-------------------|-----|----|
| 6 | OR2M7     | uc010pzk.2 | Silent            | SNP | 37 |
| 6 | FLG       | uc001ezu.1 | Missense_Mutation | SNP | 37 |
| 6 | PXDNL     | uc003xqu.4 | Silent            | SNP | 37 |
| 6 | EPB49     | uc022asw.1 | 3'UTR             | SNP | 37 |
| 6 | KIAA1244  | uc003qhu.3 | Silent            | SNP | 37 |
| 6 | ZNF292    | uc003plm.4 | Intron            | SNP | 37 |
| 6 | GZMA      | uc003jpm.3 | Missense_Mutation | SNP | 37 |
| 6 | RNF216    | uc003sox.2 | Missense_Mutation | SNP | 37 |
| 6 | ATAD3C    | uc001aft.2 | Missense_Mutation | SNP | 37 |
| 6 | PRRT4     | uc022aky.1 | Missense_Mutation | SNP | 37 |
| 6 | IGHE      | uc001ysk.1 | Missense_Mutation | SNP | 37 |
| 6 | PIIG      | uc002uez.3 | Missense_Mutation | SNP | 37 |
| 6 | KLHL25    | uc002bly.3 | Missense_Mutation | SNP | 37 |
| 6 | CHST5     | uc002fej.1 | Silent            | SNP | 37 |
| 6 | NDST1     | uc003lsk.4 | Silent            | SNP | 37 |
| 6 | VNN1      | uc003qdo.3 | Missense_Mutation | SNP | 37 |
| 6 | ZNF630    | uc004div.4 | Silent            | SNP | 37 |
| 6 | FTMT      | uc003kss.3 | 3'UTR             | SNP | 37 |
| 6 | RNF208    | uc004clz.2 | 3'UTR             | SNP | 37 |
| 6 | C7        | uc003jmh.3 | Missense_Mutation | SNP | 37 |
| 6 | DCAF4L2   | uc003ydz.3 | Missense_Mutation | SNP | 37 |
| 6 | ODZ4      | uc001ozl.4 | Silent            | SNP | 37 |
| 6 | TESK1     | uc003zxa.3 | Intron            | SNP | 37 |
| 6 | ZIM3      | uc002qnz.1 | Silent            | SNP | 37 |
| 6 | PDE1C     | uc003tco.2 | Missense_Mutation | SNP | 37 |
| 6 | LRMP      | uc001rgh.3 | Missense_Mutation | SNP | 37 |
| 6 | DOK1      | uc002sms.3 | 5'UTR             | SNP | 37 |
| 6 | GRM3      | uc003uid.3 | Silent            | SNP | 37 |
| 6 | IGFBP3    | uc003tnr.3 | Splice_Site       | SNP | 37 |
| 6 | PRCP      | uc001ozr.3 | Silent            | SNP | 37 |
| 6 | SSC5D     | uc002qlg.4 | 3'UTR             | SNP | 37 |
| 6 | BC016978  | uc001fot.1 | 3'UTR             | SNP | 37 |
| 6 | DHX16     | uc003nqz.3 | 5'UTR             | SNP | 37 |
| 6 | MUC5B     | uc001lta.3 | Missense_Mutation | SNP | 37 |
| 6 | MUC2      | uc001lsx.1 | Missense_Mutation | SNP | 37 |
| 6 | ITGAE     | uc002fwo.4 | Missense_Mutation | SNP | 37 |
| 6 | PACS1     | uc001ogz.1 | 3'UTR             | SNP | 37 |
| 6 | TMEM105   | uc002kad.2 | Missense_Mutation | SNP | 37 |
| 6 | RIPPLY2   | uc003pke.3 | 5'UTR             | SNP | 37 |
| 6 | CPSF2     | uc001yah.2 | Silent            | SNP | 37 |
| 6 | LINC00341 | uc001yeh.4 | Missense_Mutation | SNP | 37 |
| 6 | SIGLEC7   | uc002pvv.1 | Missense_Mutation | SNP | 37 |
| 6 | ADAM12    | uc001ljk.2 | Nonsense_Mutation | SNP | 37 |

|   |           |            |                   |     |    |
|---|-----------|------------|-------------------|-----|----|
| 6 | IGHE      | uc001yrw.1 | 3'UTR             | SNP | 37 |
| 6 | GABRG3    | uc001zbg.2 | Silent            | SNP | 37 |
| 6 | TTI2      | uc003xjl.4 | Missense_Mutation | SNP | 37 |
| 6 | DBH       | uc004cel.3 | Silent            | SNP | 37 |
| 6 | RAB11FIP5 | uc002siu.4 | Missense_Mutation | SNP | 37 |
| 6 | ST7       | uc003vin.3 | Silent            | SNP | 37 |
| 6 | FAM71E1   | uc002psh.3 | Missense_Mutation | SNP | 37 |
| 6 | ASPH      | uc011lel.2 | 3'UTR             | SNP | 37 |
| 6 | ANKIB1    | uc003ulw.2 | 5'UTR             | SNP | 37 |
| 6 | ZBTB32    | uc002oay.3 | Missense_Mutation | SNP | 37 |
| 6 | GIMAP6    | uc022apv.1 | Silent            | SNP | 37 |
| 6 | KCNB2     | uc003xzb.3 | Missense_Mutation | SNP | 37 |
| 6 | PCDHB8    | uc011dai.2 | Missense_Mutation | SNP | 37 |
| 6 | DEPDC5    | uc011alu.2 | Silent            | SNP | 37 |
| 6 | LAYN      | uc001plr.1 | Silent            | SNP | 37 |
| 6 | NINL      | uc002wux.1 | Silent            | SNP | 37 |
| 6 | KIF25     | uc003qwk.1 | Silent            | SNP | 37 |
| 6 | KCNA5     | uc001qni.3 | Missense_Mutation | SNP | 37 |
| 6 | AIF1L     | uc004cad.2 | Missense_Mutation | SNP | 37 |
| 6 | SLC6A20   | uc011bai.2 | Missense_Mutation | SNP | 37 |
| 6 | PCCA      | uc001voo.3 | Intron            | SNP | 37 |
| 6 | ITGAX     | uc002ebt.3 | Silent            | SNP | 37 |
| 6 | KHSRP     | uc002mer.4 | 3'UTR             | SNP | 37 |
| 6 | ASCC2     | uc003agr.3 | Nonsense_Mutation | SNP | 37 |
| 6 | PRKAG1    | uc001rsz.3 | 3'UTR             | SNP | 37 |
| 6 | SLC22A24  | uc021qkp.1 | Missense_Mutation | SNP | 37 |
| 6 | MAGEC1    | uc004fbt.3 | Missense_Mutation | SNP | 37 |
| 6 | SPTA1     | uc001fst.1 | Missense_Mutation | SNP | 37 |
| 6 | MDH2      | uc003ueo.3 | Missense_Mutation | SNP | 37 |
| 6 | PLEKHG3   | uc001xhp.2 | Silent            | SNP | 37 |
| 6 | EN1       | uc002tln.3 | Missense_Mutation | SNP | 37 |
| 6 | LDLRAD2   | uc001bfg.1 | 3'UTR             | SNP | 37 |
| 6 | ITGA7     | uc010sps.2 | Missense_Mutation | SNP | 37 |
| 6 | MAP3K5    | uc003qhc.3 | Silent            | SNP | 37 |
| 6 | ODZ3      | uc003ivd.1 | Missense_Mutation | SNP | 37 |
| 6 | RNMT      | uc010dlk.2 | 3'UTR             | SNP | 37 |
| 6 | AADAACL2  | uc003ezc.3 | Missense_Mutation | SNP | 37 |
| 6 | PRSS16    | uc003nja.3 | Silent            | SNP | 37 |
| 6 | ARHGAP33  | uc002obs.2 | Silent            | SNP | 37 |
| 6 | SIM2      | uc002yvr.2 | Silent            | SNP | 37 |
| 6 | TXNDC16   | uc001wzs.3 | Missense_Mutation | SNP | 37 |
| 6 | ZNF718    | uc003fvz.1 | Missense_Mutation | SNP | 37 |
| 6 | PTEN      | uc001kfb.3 | Splice_Site       | SNP | 37 |

|   |         |            |                       |     |    |
|---|---------|------------|-----------------------|-----|----|
| 6 | SORL1   | uc001pxx.3 | Splice_Site           | SNP | 37 |
| 6 | TNRC6C  | uc002juf.2 | Splice_Site           | SNP | 37 |
| 6 | MRPL49  | uc001oda.2 | Nonsense_Mutation     | SNP | 37 |
| 6 | ANKRD50 | uc010inw.3 | Missense_Mutation     | SNP | 37 |
| 6 | PAPPA2  | uc001gkz.3 | Splice_Site           | SNP | 37 |
| 6 | SIX5    | uc002pdb.3 | Missense_Mutation     | SNP | 37 |
| 6 | FRG1B   | uc010ztk.1 | Missense_Mutation     | SNP | 37 |
| 6 | PXN     | uc001txv.3 | Silent                | SNP | 37 |
| 6 | MYH4    | uc002gmn.3 | Missense_Mutation     | SNP | 37 |
| 6 | PLIN1   | uc010upx.1 | Missense_Mutation     | SNP | 37 |
| 6 | KCNMA1  | uc001jxn.3 | 5'UTR                 | SNP | 37 |
| 6 | FMN2    | uc010pye.2 | 5'Flank               | SNP | 37 |
| 6 | MUC3A   | uc003uxl.1 | Missense_Mutation     | SNP | 37 |
| 6 | TMCO7   | uc002ewi.4 | Missense_Mutation     | SNP | 37 |
| 6 | OR10H1  | uc002nbq.2 | Silent                | SNP | 37 |
| 6 | HMGA2   | uc001ssu.1 | Missense_Mutation     | SNP | 37 |
| 6 | POLR2A  | uc002ghf.4 | Missense_Mutation     | SNP | 37 |
| 6 | ITGB4   | uc002jpg.3 | Missense_Mutation     | SNP | 37 |
| 6 | SLCO1B1 | uc001req.4 | Missense_Mutation     | SNP | 37 |
| 6 | TSPAN32 | uc001lwd.1 | Missense_Mutation     | SNP | 37 |
| 6 | ANGPTL4 | uc002mjq.1 | Missense_Mutation     | SNP | 37 |
| 6 | SMPD4   | uc010zac.2 | Missense_Mutation     | SNP | 37 |
| 6 | PER1    | uc002gkd.3 | Missense_Mutation     | SNP | 37 |
| 6 | NCKAP5L | uc009zlk.2 | Silent                | SNP | 37 |
| 6 | GRB14   | uc002ucl.3 | Missense_Mutation     | SNP | 37 |
| 6 | CDH9    | uc003jgs.1 | Missense_Mutation     | SNP | 37 |
| 6 | MASP1   | uc003fri.3 | Silent                | SNP | 37 |
| 6 | ZNF827  | uc003ikl.3 | Silent                | SNP | 37 |
| 6 | NCOA1   | uc002rfk.3 | Missense_Mutation     | SNP | 37 |
| 6 | TJP1    | uc010azl.3 | Missense_Mutation     | SNP | 37 |
| 6 | ITGAL   | uc002dyi.4 | Missense_Mutation     | SNP | 37 |
| 6 | STL     | uc003pzq.3 | Non-coding_Transcript | SNP | 37 |
| 6 | USP6    | uc002gau.1 | Missense_Mutation     | SNP | 37 |
| 6 | COL6A3  | uc002vwl.2 | Missense_Mutation     | SNP | 37 |
| 6 | KLK3    | uc002pts.1 | 3'UTR                 | SNP | 37 |
| 6 | PLCB2   | uc001zld.3 | Silent                | SNP | 37 |
| 6 | AMIGO2  | uc001rpm.3 | Missense_Mutation     | SNP | 37 |
| 6 | HEBP1   | uc001rbd.3 | Missense_Mutation     | SNP | 37 |
| 6 | HCFC1   | uc004fjp.3 | Missense_Mutation     | SNP | 37 |
| 6 | LRP4    | uc001ndn.4 | Missense_Mutation     | SNP | 37 |
| 6 | NRIP1   | uc002yjj.2 | Missense_Mutation     | SNP | 37 |
| 6 | TYRO3   | uc001zof.2 | Missense_Mutation     | SNP | 37 |
| 6 | ABCB1   | uc003uiz.2 | Silent                | SNP | 37 |

|   |          |            |                   |     |    |
|---|----------|------------|-------------------|-----|----|
| 6 | TIGD6    | uc003lri.3 | 5'UTR             | SNP | 37 |
| 6 | TRIM31   | uc003npg.1 | Missense_Mutation | SNP | 37 |
| 6 | SENP5    | uc003fwz.4 | Missense_Mutation | SNP | 37 |
| 6 | AP1M1    | uc002ndv.2 | Silent            | SNP | 37 |
| 6 | HLA-DMB  | uc003ocj.2 | 3'UTR             | SNP | 37 |
| 6 | CR2      | uc001hfv.3 | Nonsense_Mutation | SNP | 37 |
| 6 | CACNB2   | uc001ipr.2 | Missense_Mutation | SNP | 37 |
| 6 | TTN      | uc021vsy.1 | Silent            | SNP | 37 |
| 6 | ZNF554   | uc002lwm.2 | Silent            | SNP | 37 |
| 6 | AK127124 | uc002try.1 | 5'UTR             | SNP | 37 |
| 6 | ENOSF1   | uc010dkf.3 | 3'UTR             | SNP | 37 |
| 6 | SLC35C1  | uc001nbp.3 | 3'UTR             | SNP | 37 |
| 6 | FBN2     | uc003kuu.3 | Missense_Mutation | SNP | 37 |
| 6 | ZNF765   | uc010ydx.2 | Missense_Mutation | SNP | 37 |
| 6 | SCN3B    | uc001pza.1 | Silent            | SNP | 37 |
| 6 | CBS      | uc002zcu.2 | Missense_Mutation | SNP | 37 |
| 6 | GPR113   | uc002rhe.4 | Silent            | SNP | 37 |
| 6 | NME8     | uc003tfn.3 | Missense_Mutation | SNP | 37 |
| 6 | SH3TC2   | uc003lpu.3 | Missense_Mutation | SNP | 37 |
| 6 | ALK      | uc002rmy.3 | Missense_Mutation | SNP | 37 |
| 6 | EIF2AK4  | uc001zkm.1 | Silent            | SNP | 37 |
| 6 | ARMC10   | uc003vaw.2 | Missense_Mutation | SNP | 37 |
| 6 | XIAP     | uc010nqu.3 | 3'UTR             | SNP | 37 |
| 6 | CDH12    | uc010iuc.2 | Intron            | SNP | 37 |
| 6 | OVCH1    | uc001rix.1 | Nonsense_Mutation | SNP | 37 |
| 6 | LGALS16  | uc021uun.1 | Silent            | SNP | 37 |
| 6 | SUSD4    | uc001hnx.3 | Missense_Mutation | SNP | 37 |
| 6 | FAM151A  | uc001cxn.3 | 5'UTR             | SNP | 37 |
| 6 | TRPM2    | uc010gpt.1 | Silent            | SNP | 37 |
| 6 | UNG      | uc001toa.2 | 5'UTR             | SNP | 37 |
| 6 | OR51F1   | uc010qyl.2 | Missense_Mutation | SNP | 37 |
| 6 | EPS8L2   | uc010qwk.2 | Silent            | SNP | 37 |
| 6 | VPS4B    | uc002lix.3 | Silent            | SNP | 37 |
| 6 | OR2T34   | uc001iep.1 | Silent            | SNP | 37 |
| 6 | OVOS2    | uc010sjy.1 | Silent            | SNP | 37 |
| 6 | NOBOX    | uc022aoj.1 | Splice_Site       | SNP | 37 |
| 6 | EFEMP1   | uc002rzi.3 | 3'UTR             | SNP | 37 |
| 6 | GNA14    | uc004aku.3 | Silent            | SNP | 37 |
| 6 | ZNF823   | uc002msm.2 | Silent            | SNP | 37 |
| 6 | THSD7B   | uc002tva.1 | Nonsense_Mutation | SNP | 37 |
| 6 | GDPD5    | uc009yue.1 | Missense_Mutation | SNP | 37 |
| 6 | ZNF44    | uc010xmj.2 | 3'UTR             | SNP | 37 |
| 6 | PTK2B    | uc003xfr.1 | 5'UTR             | SNP | 37 |



|   |          |            |                       |     |    |
|---|----------|------------|-----------------------|-----|----|
| 6 | ADAM28   | uc003xdy.3 | Missense_Mutation     | SNP | 37 |
| 6 | INSIG1   | uc003wly.3 | Missense_Mutation     | SNP | 37 |
| 6 | ARPP21   | uc011axy.2 | Missense_Mutation     | SNP | 37 |
| 6 | RIN1     | uc001ohn.1 | Missense_Mutation     | SNP | 37 |
| 6 | TACC2    | uc001lfv.3 | Missense_Mutation     | SNP | 37 |
| 6 | TTN      | uc021vsy.1 | Nonsense_Mutation     | SNP | 37 |
| 6 | MARCO    | uc002tln.1 | Silent                | SNP | 37 |
| 6 | ARHGAP29 | uc001dqj.4 | Missense_Mutation     | SNP | 37 |
| 6 | BET3L    | uc011ebh.2 | Missense_Mutation     | SNP | 37 |
| 6 | SH3PXD2A | uc001kxj.1 | Nonsense_Mutation     | SNP | 37 |
| 6 | OR2A25   | uc011ktx.2 | Silent                | SNP | 37 |
| 6 | PTPRD    | uc003zkk.3 | Silent                | SNP | 37 |
| 6 | FRMPD1   | uc004aag.1 | Nonsense_Mutation     | SNP | 37 |
| 6 | LTBP1    | uc021vft.1 | Splice_Site           | SNP | 37 |
| 6 | RFWD2    | uc001gku.1 | Silent                | SNP | 37 |
| 6 | PDE6G    | uc002kay.3 | 3'UTR                 | SNP | 37 |
| 6 | SORCS3   | uc001kyi.1 | Missense_Mutation     | SNP | 37 |
| 6 | KALRN    | uc003ehi.3 | 5'UTR                 | SNP | 37 |
| 6 | PCMTD2   | uc002yil.4 | Silent                | SNP | 37 |
| 6 | HINT2    | uc003zyh.3 | Intron                | SNP | 37 |
| 6 | HUNK     | uc002yph.3 | Missense_Mutation     | SNP | 37 |
| 6 | NAALADL1 | uc001ocn.3 | Missense_Mutation     | SNP | 37 |
| 6 | NCKAP1L  | uc001sgc.4 | Silent                | SNP | 37 |
| 6 | AK123816 | uc003lux.1 | Intron                | SNP | 37 |
| 6 | SERPINA9 | uc001ydf.3 | Missense_Mutation     | SNP | 37 |
| 6 | HEG1     | uc011bke.2 | Missense_Mutation     | SNP | 37 |
| 6 | NLRP12   | uc002qcj.4 | Missense_Mutation     | SNP | 37 |
| 6 | HIVEP1   | uc003nac.3 | Missense_Mutation     | SNP | 37 |
| 6 | HRH2     | uc003mdc.4 | Silent                | SNP | 37 |
| 6 | CTU2     | uc010chz.3 | Missense_Mutation     | SNP | 37 |
| 6 | OR2A1    | uc011kud.2 | Missense_Mutation     | SNP | 37 |
| 6 | PLXNC1   | uc001tdc.3 | Silent                | SNP | 37 |
| 6 | PRDM11   | uc001myo.3 | 5'UTR                 | SNP | 37 |
| 6 | CLSTN3   | uc001qss.3 | Silent                | SNP | 37 |
| 6 | HIVEP1   | uc003nac.3 | Silent                | SNP | 37 |
| 6 | C1orf61  | uc001fou.1 | Intron                | SNP | 37 |
| 6 | C1QL2    | uc002tlo.2 | Missense_Mutation     | SNP | 37 |
| 6 | KRT27    | uc002hvg.3 | Silent                | SNP | 37 |
| 6 | RPS27    | uc001fdv.3 | Splice_Site           | SNP | 37 |
| 6 | MALAT1   | uc010roh.2 | Non-coding_Transcript | SNP | 37 |
| 6 | LCE3D    | uc001fab.3 | 3'UTR                 | SNP | 37 |
| 6 | COBL     | uc003tps.3 | Missense_Mutation     | SNP | 37 |
| 6 | BPIFA2   | uc002wyo.1 | Splice_Site           | SNP | 37 |

|   |           |            |                       |     |    |
|---|-----------|------------|-----------------------|-----|----|
| 6 | KIAA1614  | uc001gok.2 | Missense_Mutation     | SNP | 37 |
| 6 | GDAP1L1   | uc010zwl.2 | Missense_Mutation     | SNP | 37 |
| 6 | MOS       | uc011leb.2 | Silent                | SNP | 37 |
| 6 | C20orf152 | uc002xer.1 | Silent                | SNP | 37 |
| 6 | C1RL      | uc009zft.3 | Missense_Mutation     | SNP | 37 |
| 6 | ABHD12B   | uc001wys.3 | Silent                | SNP | 37 |
| 6 | OR2T34    | uc001iep.1 | Silent                | SNP | 37 |
| 6 | GAK       | uc003gbm.4 | Intron                | SNP | 37 |
| 6 | ODZ2      | uc010jld.3 | Missense_Mutation     | SNP | 37 |
| 6 | ASCC3     | uc010kcv.3 | 3'UTR                 | SNP | 37 |
| 6 | ZNF701    | uc010ydn.2 | Silent                | SNP | 37 |
| 6 | CPEB1     | uc002bit.3 | Missense_Mutation     | SNP | 37 |
| 6 | TUBA1B    | uc001rtm.3 | Silent                | SNP | 37 |
| 6 | MOCS3     | uc002xvy.1 | Silent                | SNP | 37 |
| 6 | ZFP62     | uc011dhf.2 | Missense_Mutation     | SNP | 37 |
| 6 | ZCCHC5    | uc004edc.1 | Silent                | SNP | 37 |
| 6 | TRIOBP    | uc003atr.3 | Silent                | SNP | 37 |
| 6 | ROCK2     | uc002rbd.1 | Missense_Mutation     | SNP | 37 |
| 6 | OBSCN     | uc009xez.1 | Missense_Mutation     | SNP | 37 |
| 6 | PPP2CB    | uc003xik.3 | 5'UTR                 | SNP | 37 |
| 6 | MUC16     | uc002mkp.3 | Missense_Mutation     | SNP | 37 |
| 6 | CDC73     | uc001gtb.3 | 3'UTR                 | SNP | 37 |
| 6 | THEG5     | uc021urz.1 | Missense_Mutation     | SNP | 37 |
| 6 | UBD       | uc003nmo.3 | Silent                | SNP | 37 |
| 6 | DMD       | uc004dda.1 | Silent                | SNP | 37 |
| 6 | LRRC55    | uc001njl.2 | 5'UTR                 | SNP | 37 |
| 6 | CACNA2D4  | uc021qxs.1 | Splice_Site           | SNP | 37 |
| 6 | ARHGAP9   | uc001sod.3 | Nonsense_Mutation     | SNP | 37 |
| 6 | LMCD1     | uc003bqq.3 | Missense_Mutation     | SNP | 37 |
| 6 | PKD1L3    | uc010vmm.2 | Missense_Mutation     | SNP | 37 |
| 6 | SLAMF1    | uc001fwl.4 | Missense_Mutation     | SNP | 37 |
| 6 | FGFR1OP   | uc003qvj.3 | Silent                | SNP | 37 |
| 6 | VEPH1     | uc003fbj.2 | Silent                | SNP | 37 |
| 6 | KLF6      | uc001iha.3 | 3'UTR                 | SNP | 37 |
| 6 | LRP4      | uc001ndn.4 | Missense_Mutation     | SNP | 37 |
| 6 | PLCG2     | uc002fgt.3 | Missense_Mutation     | SNP | 37 |
| 6 | MUS81     | uc001ofv.4 | Missense_Mutation     | SNP | 37 |
| 6 | SRCIN1    | uc002hqd.3 | Missense_Mutation     | SNP | 37 |
| 6 | LAMB4     | uc010ljo.1 | 3'UTR                 | SNP | 37 |
| 6 | SERPINB2  | uc010xeu.2 | Missense_Mutation     | SNP | 37 |
| 6 | ZSCAN12   | uc010jre.3 | Non-coding_Transcript | SNP | 37 |
| 6 | GAK       | uc003gbm.4 | Missense_Mutation     | SNP | 37 |
| 6 | TRIM29    | uc001pwz.3 | Silent                | SNP | 37 |

|   |           |            |                       |     |    |
|---|-----------|------------|-----------------------|-----|----|
| 6 | CCDC135   | uc002emi.3 | 3'UTR                 | SNP | 37 |
| 6 | MUTYH     | uc009vxp.3 | Missense_Mutation     | SNP | 37 |
| 6 | TTN       | uc021vsy.1 | Missense_Mutation     | SNP | 37 |
| 6 | SNX4      | uc003eib.3 | Silent                | SNP | 37 |
| 6 | VSTM2L    | uc002xhk.4 | Silent                | SNP | 37 |
| 6 | IPW       | uc001yjh.1 | Intron                | SNP | 37 |
| 6 | PEG3      | uc002qnu.2 | Missense_Mutation     | SNP | 37 |
| 6 | ABCB1     | uc003uiz.2 | Missense_Mutation     | SNP | 37 |
| 6 | KCNB2     | uc003xzb.3 | Missense_Mutation     | SNP | 37 |
| 6 | ZNF101    | uc002nni.2 | Silent                | SNP | 37 |
| 6 | SYNJ1     | uc002yqh.2 | Nonsense_Mutation     | SNP | 37 |
| 6 | TTN       | uc021vsy.1 | Silent                | SNP | 37 |
| 6 | PPP1R1B   | uc002hrz.3 | Missense_Mutation     | SNP | 37 |
| 6 | DNAH3     | uc010vbe.2 | Silent                | SNP | 37 |
| 6 | CASS4     | uc002xyp.2 | 3'UTR                 | SNP | 37 |
| 6 | MUC4      | uc021xjp.1 | Missense_Mutation     | SNP | 37 |
| 6 | CCKAR     | uc003gse.1 | Missense_Mutation     | SNP | 37 |
| 6 | BEND7     | uc001imm.2 | Silent                | SNP | 37 |
| 6 | ZNF101    | uc002nni.2 | Silent                | SNP | 37 |
| 6 | RAPGEF6   | uc003kvp.2 | Missense_Mutation     | SNP | 37 |
| 6 | C14orf105 | uc010trl.1 | Missense_Mutation     | SNP | 37 |
| 6 | OPRL1     | uc002yic.3 | Missense_Mutation     | SNP | 37 |
| 6 | SERINC2   | uc021okm.1 | Silent                | SNP | 37 |
| 6 | EEA1      | uc001tck.3 | Missense_Mutation     | SNP | 37 |
| 6 | TMEM230   | uc002wlk.3 | Missense_Mutation     | SNP | 37 |
| 6 | SERPINB3  | uc010dqc.2 | 3'UTR                 | SNP | 37 |
| 6 | NOTCH1    | uc004chz.3 | Missense_Mutation     | SNP | 37 |
| 6 | DQ587284  | uc010xoy.2 | 5'Flank               | SNP | 37 |
| 6 | SMC4      | uc003fdh.3 | Missense_Mutation     | SNP | 37 |
| 6 | RC3H2     | uc010mwc.1 | Missense_Mutation     | SNP | 37 |
| 6 | AMPH      | uc003tgu.3 | Missense_Mutation     | SNP | 37 |
| 6 | SCML1     | uc004cyb.3 | Missense_Mutation     | SNP | 37 |
| 6 | PRPF40B   | uc001rur.1 | Splice_Site           | SNP | 37 |
| 6 | KIR2DL1   | uc010erz.1 | Nonsense_Mutation     | SNP | 37 |
| 6 | PHYH      | uc001imf.3 | Silent                | SNP | 37 |
| 6 | MAGI3     | uc001edk.3 | Missense_Mutation     | SNP | 37 |
| 6 | SETD1B    | uc001ubi.3 | 3'UTR                 | SNP | 37 |
| 6 | AK097607  | uc003vrd.1 | Non-coding_Transcript | SNP | 37 |
| 6 | APOA5     | uc009yzg.3 | Silent                | SNP | 37 |
| 6 | TACC2     | uc001lfv.3 | Splice_Site           | SNP | 37 |
| 6 | ASPH      | uc003xuj.3 | Intron                | SNP | 37 |
| 6 | DYSF      | uc010fen.3 | Silent                | SNP | 37 |
| 6 | PLEKHG2   | uc010xuz.2 | Missense_Mutation     | SNP | 37 |

|   |          |            |                   |     |    |
|---|----------|------------|-------------------|-----|----|
| 6 | SNX15    | uc001oci.4 | Splice_Site       | SNP | 37 |
| 6 | TEX2     | uc002jed.3 | Missense_Mutation | SNP | 37 |
| 6 | FAM135A  | uc003pfj.3 | Silent            | SNP | 37 |
| 6 | DUSP27   | uc001geb.1 | Silent            | SNP | 37 |
| 6 | RBMXL3   | uc011mte.1 | Silent            | SNP | 37 |
| 6 | SLC38A4  | uc001rpi.2 | Missense_Mutation | SNP | 37 |
| 6 | PLCE1    | uc001kjk.3 | 5'UTR             | SNP | 37 |
| 6 | CGNL1    | uc010bfw.3 | Silent            | SNP | 37 |
| 6 | MAPK8IP3 | uc010uvl.2 | Missense_Mutation | SNP | 37 |
| 6 | SRP14    | uc001zkq.2 | 5'UTR             | SNP | 37 |
| 6 | HSPB8    | uc001txb.3 | Nonsense_Mutation | SNP | 37 |
| 6 | CBX4     | uc002jxe.3 | Nonsense_Mutation | SNP | 37 |
| 6 | STK32A   | uc011dbw.1 | Missense_Mutation | SNP | 37 |
| 6 | XRCC5    | uc002vfy.3 | 3'UTR             | SNP | 37 |
| 6 | MRS2     | uc003nea.3 | 3'UTR             | SNP | 37 |
| 6 | YIPF5    | uc003lnk.4 | 3'UTR             | SNP | 37 |
| 6 | FGFR3    | uc003gdu.2 | Silent            | SNP | 37 |
| 6 | OBSCN    | uc001hso.3 | Missense_Mutation | SNP | 37 |
| 6 | ADAM7    | uc003xeb.3 | Missense_Mutation | SNP | 37 |
| 6 | NOS1     | uc001tw.2  | Missense_Mutation | SNP | 37 |
| 6 | MRVI1    | uc010rcc.1 | Missense_Mutation | SNP | 37 |
| 6 | COL21A1  | uc003pcs.3 | Missense_Mutation | SNP | 37 |
| 6 | SDCCAG3  | uc004chi.3 | Missense_Mutation | SNP | 37 |
| 6 | TP63     | uc003fry.2 | Missense_Mutation | SNP | 37 |
| 6 | COL11A1  | uc001dum.3 | Silent            | SNP | 37 |
| 6 | OR8G1    | uc001pzx.3 | 3'UTR             | SNP | 37 |
| 6 | ATP2A3   | uc002fwy.2 | Missense_Mutation | SNP | 37 |
| 6 | TRHDE    | uc001sxa.3 | Missense_Mutation | SNP | 37 |
| 6 | ICOSLG   | uc002zee.3 | 3'UTR             | SNP | 37 |
| 6 | DZIP1L   | uc003erq.3 | Missense_Mutation | SNP | 37 |
| 6 | PLXDC2   | uc001iqg.1 | Nonsense_Mutation | SNP | 37 |
| 6 | MYO10    | uc003jft.4 | Missense_Mutation | SNP | 37 |
| 6 | MAP7D2   | uc010nfo.2 | Missense_Mutation | SNP | 37 |
| 6 | NRIP1    | uc002y.2   | Silent            | SNP | 37 |
| 6 | GSN      | uc004blf.1 | Nonsense_Mutation | SNP | 37 |
| 6 | MGAM     | uc003vwy.3 | Intron            | SNP | 37 |
| 6 | GLI2     | uc010flp.3 | Silent            | SNP | 37 |
| 6 | DTL      | uc009xdc.3 | Missense_Mutation | SNP | 37 |
| 6 | PTDSS1   | uc003yht.1 | Missense_Mutation | SNP | 37 |
| 6 | CCDC166  | uc011lkr.2 | Missense_Mutation | SNP | 37 |
| 6 | AP3B1    | uc003kfj.3 | 5'UTR             | SNP | 37 |
| 6 | LTBP1    | uc021vft.1 | Missense_Mutation | SNP | 37 |
| 6 | C1orf226 | uc010pkt.1 | Missense_Mutation | SNP | 37 |

|   |              |            |                   |     |    |
|---|--------------|------------|-------------------|-----|----|
| 6 | PRB2         | uc010shk.1 | Missense_Mutation | SNP | 37 |
| 6 | HOXA2        | uc003syh.3 | 5'UTR             | SNP | 37 |
| 6 | ECT2L        | uc003qif.2 | Silent            | SNP | 37 |
| 6 | RPS6KA2      | uc003qvd.1 | 3'UTR             | SNP | 37 |
| 6 | FSTL4        | uc003kyn.1 | Silent            | SNP | 37 |
| 6 | FGF3         | uc001oph.3 | Silent            | SNP | 37 |
| 6 | ZNF837       | uc002qsm.3 | Missense_Mutation | SNP | 37 |
| 6 | ASMT         | uc004cq.3  | Missense_Mutation | SNP | 37 |
| 6 | ADAMTS13     | uc004cdv.4 | Silent            | SNP | 37 |
| 6 | TSR1         | uc002fuj.3 | 3'UTR             | SNP | 37 |
| 6 | MLLT4        | uc021zik.1 | Missense_Mutation | SNP | 37 |
| 6 | TTC39A       | uc001cso.1 | 3'UTR             | SNP | 37 |
| 6 | KY           | uc010hty.3 | Silent            | SNP | 37 |
| 6 | MYCN         | uc002rci.3 | Silent            | SNP | 37 |
| 6 | TGFBRAP1     | uc002tcq.3 | Missense_Mutation | SNP | 37 |
| 6 | SPEF2        | uc003jjo.3 | Missense_Mutation | SNP | 37 |
| 6 | RABEP1       | uc002gbm.4 | Missense_Mutation | SNP | 37 |
| 6 | IMPAD1       | uc003xte.4 | Silent            | SNP | 37 |
| 6 | PHYH         | uc001imf.3 | Missense_Mutation | SNP | 37 |
| 6 | DNAH14       | uc001how.2 | Silent            | SNP | 37 |
| 6 | BRCA2        | uc001uub.1 | Missense_Mutation | SNP | 37 |
| 6 | ZBTB49       | uc003ghu.3 | Missense_Mutation | SNP | 37 |
| 6 | REPS2        | uc004cxv.1 | Missense_Mutation | SNP | 37 |
| 6 | APLP2        | uc021qsg.1 | Missense_Mutation | SNP | 37 |
| 6 | AIRE         | uc002zei.2 | Silent            | SNP | 37 |
| 6 | MCTP2        | uc002btj.3 | Missense_Mutation | SNP | 37 |
| 6 | LOC100130357 | uc003nak.1 | 5'UTR             | SNP | 37 |
| 6 | FOLR1        | uc001orz.2 | Nonsense_Mutation | SNP | 37 |
| 6 | HSPE1-MOB4   | uc002uun.4 | 5'UTR             | SNP | 37 |
| 6 | OR5AP2       | uc001njb.1 | Silent            | SNP | 37 |
| 6 | RGPD4        | uc010ywk.2 | 3'UTR             | SNP | 37 |
| 6 | VWA5B2       | uc003fnc.3 | Missense_Mutation | SNP | 37 |
| 6 | OR10J5       | uc010piw.2 | Silent            | SNP | 37 |
| 6 | TAAR2        | uc003qdl.1 | Silent            | SNP | 37 |
| 6 | KIF4B        | uc010jih.1 | 5'UTR             | SNP | 37 |
| 6 | MAG          | uc002nyy.2 | Missense_Mutation | SNP | 37 |
| 6 | TNRC6A       | uc002dmm.3 | Silent            | SNP | 37 |
| 6 | PPFIA2       | uc021rbe.1 | 5'UTR             | SNP | 37 |
| 6 | TAS2R41      | uc003wdc.1 | Missense_Mutation | SNP | 37 |
| 6 | POU5F1B      | uc003ysf.3 | Silent            | SNP | 37 |
| 6 | PIK3C2G      | uc010sib.2 | Missense_Mutation | SNP | 37 |
| 6 | DOCK11       | uc004eqp.2 | Silent            | SNP | 37 |
| 6 | CD209        | uc002mht.2 | 5'UTR             | SNP | 37 |

|   |              |            |                       |     |    |
|---|--------------|------------|-----------------------|-----|----|
| 6 | PPFIA4       | uc001gyz.3 | 5'UTR                 | SNP | 37 |
| 6 | LOC151760    | uc003dxs.1 | Silent                | SNP | 37 |
| 6 | HLA-A        | uc003nol.3 | Missense_Mutation     | SNP | 37 |
| 6 | NES          | uc001fpq.3 | Missense_Mutation     | SNP | 37 |
| 6 | POP1         | uc003yij.4 | Nonsense_Mutation     | SNP | 37 |
| 6 | SCAI         | uc004bpd.3 | 3'UTR                 | SNP | 37 |
| 6 | TRA          | uc021rpa.1 | Silent                | SNP | 37 |
| 6 | BC036435     | uc021ogr.1 | 5'Flank               | SNP | 37 |
| 6 | FBLN1        | uc010gzz.3 | Silent                | SNP | 37 |
| 6 | EML1         | uc001ygr.3 | Silent                | SNP | 37 |
| 6 | LGALS9       | uc002gzp.3 | Silent                | SNP | 37 |
| 6 | WIPF2        | uc002hug.1 | Silent                | SNP | 37 |
| 6 | EPHA3        | uc003dqy.3 | Missense_Mutation     | SNP | 37 |
| 6 | DTX4         | uc001nns.2 | Missense_Mutation     | SNP | 37 |
| 6 | abParts      | uc021wmm.1 | Intron                | SNP | 37 |
| 6 | FAM40A       | uc001dza.1 | 3'UTR                 | SNP | 37 |
| 6 | MGAT4C       | uc010sum.2 | Missense_Mutation     | SNP | 37 |
| 6 | C1orf105     | uc001gik.3 | Silent                | SNP | 37 |
| 6 | HLA-DPA1     | uc010juk.3 | 3'UTR                 | SNP | 37 |
| 6 | MED1         | uc002hrv.4 | 3'UTR                 | SNP | 37 |
| 6 | MTMR8        | uc011mou.2 | Missense_Mutation     | SNP | 37 |
| 6 | COL4A4       | uc021vrx.1 | Missense_Mutation     | SNP | 37 |
| 6 | MPP3         | uc002ieh.3 | Silent                | SNP | 37 |
| 6 | ERCC8        | uc003jss.3 | Intron                | SNP | 37 |
| 6 | USP15        | uc001src.2 | Missense_Mutation     | SNP | 37 |
| 6 | ARGFX        | uc003eef.3 | 3'UTR                 | SNP | 37 |
| 6 | TNFSF14      | uc002mfk.2 | 5'UTR                 | SNP | 37 |
| 6 | abParts      | uc021ser.1 | Non-coding_Transcript | SNP | 37 |
| 6 | ZNF737       | uc002npa.3 | Missense_Mutation     | SNP | 37 |
| 6 | AIRE         | uc002zei.2 | Silent                | SNP | 37 |
| 6 | CAST         | uc011cuo.1 | Intron                | SNP | 37 |
| 6 | PTK7         | uc011dve.1 | Missense_Mutation     | SNP | 37 |
| 6 | EPHA6        | uc010how.1 | Missense_Mutation     | SNP | 37 |
| 6 | NUDCD3       | uc003tkz.3 | 5'UTR                 | SNP | 37 |
| 6 | BAZ1A        | uc001wsk.3 | 5'UTR                 | SNP | 37 |
| 6 | ZNF747       | uc002dyn.3 | Missense_Mutation     | SNP | 37 |
| 6 | CDC42BPA     | uc001hqr.3 | Missense_Mutation     | SNP | 37 |
| 6 | ZNF100       | uc002nqi.3 | Missense_Mutation     | SNP | 37 |
| 6 | TRIM6-TRIM34 | uc001mbf.3 | Missense_Mutation     | SNP | 37 |
| 6 | RASA3        | uc001vui.3 | Silent                | SNP | 37 |
| 6 | LOC641298    | uc010bxf.3 | 5'Flank               | SNP | 37 |
| 6 | ITM2B        | uc001vbz.3 | 5'UTR                 | SNP | 37 |
| 6 | MCOLN1       | uc002mgo.3 | Missense_Mutation     | SNP | 37 |

|   |          |            |                   |     |    |
|---|----------|------------|-------------------|-----|----|
| 6 | MED21    | uc001rhp.1 | Missense_Mutation | SNP | 37 |
| 6 | OR2A12   | uc011kty.2 | Missense_Mutation | SNP | 37 |
| 6 | DYNC1H1  | uc001yks.2 | Silent            | SNP | 37 |
| 6 | TNN      | uc001gkl.1 | Splice_Site       | SNP | 37 |
| 6 | RAB43    | uc003eln.2 | Missense_Mutation | SNP | 37 |
| 6 | NCEH1    | uc011bpx.2 | Missense_Mutation | SNP | 37 |
| 6 | DUSP26   | uc003xjp.3 | Missense_Mutation | SNP | 37 |
| 6 | FCGR1A   | uc001esp.4 | Missense_Mutation | SNP | 37 |
| 6 | FAM53C   | uc011cyr.2 | Silent            | SNP | 37 |
| 6 | ABHD6    | uc003djs.4 | Missense_Mutation | SNP | 37 |
| 6 | USP15    | uc001src.2 | Missense_Mutation | SNP | 37 |
| 6 | TNR      | uc001gkp.1 | Missense_Mutation | SNP | 37 |
| 6 | FLJ25328 | uc002ncc.3 | Intron            | SNP | 37 |
| 6 | ASF1A    | uc011ebn.2 | Missense_Mutation | SNP | 37 |
| 6 | PGM3     | uc011dyz.2 | Silent            | SNP | 37 |
| 6 | CCDC83   | uc001pbg.1 | Missense_Mutation | SNP | 37 |
| 6 | AP5Z1    | uc003sne.3 | Silent            | SNP | 37 |
| 6 | MOXD1    | uc003qdf.3 | Splice_Site       | SNP | 37 |
| 6 | APOL1    | uc003ape.3 | Missense_Mutation | SNP | 37 |
| 6 | TAB1     | uc003axr.3 | Missense_Mutation | SNP | 37 |
| 6 | CTAGE1   | uc002ktv.1 | Silent            | SNP | 37 |
| 6 | CHRM3    | uc001hyp.3 | Nonsense_Mutation | SNP | 37 |
| 6 | PCM1     | uc022asj.1 | Missense_Mutation | SNP | 37 |
| 6 | ZNF274   | uc002qrq.1 | Missense_Mutation | SNP | 37 |
| 6 | SPAST    | uc002roc.3 | Missense_Mutation | SNP | 37 |
| 6 | SAMD9    | uc003umf.3 | Missense_Mutation | SNP | 37 |
| 6 | NEK5     | uc001vge.3 | Missense_Mutation | SNP | 37 |
| 6 | RBM5     | uc003cyg.3 | Silent            | SNP | 37 |
| 6 | KBTBD6   | uc001uxu.1 | 3'UTR             | SNP | 37 |
| 6 | LIFR     | uc010ive.1 | Nonsense_Mutation | SNP | 37 |
| 6 | ACE2     | uc004cxa.1 | Missense_Mutation | SNP | 37 |
| 6 | GMPR     | uc003nbs.3 | Splice_Site       | SNP | 37 |
| 6 | GTF3A    | uc001ure.2 | Missense_Mutation | SNP | 37 |
| 6 | ALOX15   | uc010vse.2 | Missense_Mutation | SNP | 37 |
| 6 | BRCA1    | uc002ict.3 | Missense_Mutation | SNP | 37 |
| 6 | SPTB     | uc001xhr.3 | Silent            | SNP | 37 |
| 6 | HAMP     | uc002nyw.3 | 3'UTR             | SNP | 37 |
| 6 | FUBP3    | uc004bzz.1 | Missense_Mutation | SNP | 37 |
| 6 | U2AF1    | uc002zda.1 | Missense_Mutation | SNP | 37 |
| 6 | FAM183B  | uc011kbd.2 | 3'UTR             | SNP | 37 |
| 6 | SMARCAD1 | uc003htb.4 | Missense_Mutation | SNP | 37 |
| 6 | C8orf33  | uc003zfc.4 | Missense_Mutation | SNP | 37 |
| 6 | OR2M5    | uc010pze.2 | Missense_Mutation | SNP | 37 |

|   |            |            |                       |     |    |
|---|------------|------------|-----------------------|-----|----|
| 6 | GRIP2      | uc003byu.1 | 3'UTR                 | SNP | 37 |
| 6 | KCNS2      | uc003yin.3 | Missense_Mutation     | SNP | 37 |
| 6 | PATE1      | uc001qct.3 | 3'UTR                 | SNP | 37 |
| 6 | DEFB129    | uc002wda.3 | Silent                | SNP | 37 |
| 6 | ATRN       | uc002wim.2 | Missense_Mutation     | SNP | 37 |
| 6 | DOCK3      | uc011bds.2 | Missense_Mutation     | SNP | 37 |
| 6 | GDAP1L1    | uc010zwl.2 | Silent                | SNP | 37 |
| 6 | TEAD3      | uc003okt.3 | 5'UTR                 | SNP | 37 |
| 6 | DSG4       | uc002kwr.2 | Silent                | SNP | 37 |
| 6 | UNC13C     | uc021sms.1 | Silent                | SNP | 37 |
| 6 | MPO        | uc002ivu.1 | Missense_Mutation     | SNP | 37 |
| 6 | MYCN       | uc002rci.3 | Nonsense_Mutation     | SNP | 37 |
| 6 | PCSK5      | uc004akc.2 | Silent                | SNP | 37 |
| 6 | GLIPR1     | uc001sxs.3 | Nonsense_Mutation     | SNP | 37 |
| 6 | MLX        | uc002iag.3 | 3'UTR                 | SNP | 37 |
| 6 | CACNG7     | uc002qcr.2 | Silent                | SNP | 37 |
| 6 | CCDC9      | uc010xym.2 | Missense_Mutation     | SNP | 37 |
| 6 | GRIA1      | uc011dcy.2 | Missense_Mutation     | SNP | 37 |
| 6 | PXDN       | uc002qxa.3 | Silent                | SNP | 37 |
| 6 | FAM129B    | uc004brh.3 | Silent                | SNP | 37 |
| 6 | KRT15      | uc002hwy.3 | Silent                | SNP | 37 |
| 6 | ZP1        | uc001nqd.3 | Silent                | SNP | 37 |
| 6 | MAML1      | uc003mkm.3 | Missense_Mutation     | SNP | 37 |
| 6 | AK126852   | uc002fkt.1 | 3'UTR                 | SNP | 37 |
| 6 | MYCL1      | uc001cer.2 | Missense_Mutation     | SNP | 37 |
| 6 | AK123300   | uc003sqr.1 | Non-coding_Transcript | SNP | 37 |
| 6 | SHANK2-AS3 | uc009yso.2 | Missense_Mutation     | SNP | 37 |
| 6 | MUC17      | uc003uxp.1 | Missense_Mutation     | SNP | 37 |
| 6 | LOC442132  | uc003jdy.2 | Non-coding_Transcript | SNP | 37 |
| 6 | MAFK       | uc003skr.3 | Silent                | SNP | 37 |
| 6 | DNAJC10    | uc002uow.1 | Intron                | SNP | 37 |
| 6 | RIMS4      | uc010ggg.3 | Missense_Mutation     | SNP | 37 |
| 6 | XPO1       | uc010ypn.2 | Missense_Mutation     | SNP | 37 |
| 6 | LPIN1      | uc010yjm.2 | Missense_Mutation     | SNP | 37 |
| 6 | C16orf71   | uc002cxn.3 | Silent                | SNP | 37 |
| 6 | IFT122     | uc003eml.3 | Silent                | SNP | 37 |
| 6 | HIST3H2A   | uc001hsy.3 | Silent                | SNP | 37 |
| 6 | BRAF       | uc003vwc.4 | Missense_Mutation     | SNP | 37 |
| 6 | TAS2R13    | uc001qzg.1 | Missense_Mutation     | SNP | 37 |
| 6 | NEDD4L     | uc002lgy.3 | Splice_Site           | SNP | 37 |
| 6 | MGAM       | uc003vwy.3 | Silent                | SNP | 37 |
| 6 | TRIM72     | uc002ebn.2 | Missense_Mutation     | SNP | 37 |
| 6 | ALDH18A1   | uc001kkz.3 | Silent                | SNP | 37 |



|   |          |            |                       |     |    |
|---|----------|------------|-----------------------|-----|----|
| 6 | SLC8A3   | uc001xly.3 | Missense_Mutation     | SNP | 37 |
| 6 | TOR1AIP1 | uc001gnq.3 | Nonsense_Mutation     | SNP | 37 |
| 6 | NRXN1    | uc021vhg.1 | Missense_Mutation     | SNP | 37 |
| 6 | NACAP1   | uc003ykc.1 | 5'Flank               | SNP | 37 |
| 6 | EXOC4    | uc003vrk.3 | Silent                | SNP | 37 |
| 6 | SPINK5   | uc003loy.2 | Silent                | SNP | 37 |
| 6 | MPP4     | uc002uym.1 | 3'UTR                 | SNP | 37 |
| 6 | BC034827 | uc003xew.3 | Non-coding_Transcript | SNP | 37 |
| 6 | AK130486 | uc001txn.1 | Missense_Mutation     | SNP | 37 |
| 6 | SETBP1   | uc010dni.3 | Silent                | SNP | 37 |
| 6 | MUC5B    | uc021qbr.1 | Intron                | SNP | 37 |
| 6 | RPE      | uc002vdn.3 | Missense_Mutation     | SNP | 37 |
| 6 | LRIT2    | uc010qmc.2 | Silent                | SNP | 37 |
| 6 | DNMT3L   | uc002zeh.1 | Silent                | SNP | 37 |
| 6 | MUC20    | uc010hzo.3 | 5'UTR                 | SNP | 37 |
| 6 | KIF13A   | uc003ncg.4 | Missense_Mutation     | SNP | 37 |
| 6 | OR6B1    | uc003wdt.1 | Missense_Mutation     | SNP | 37 |
| 6 | AXIN1    | uc002cgp.2 | Silent                | SNP | 37 |
| 6 | ODZ2     | uc010jld.3 | Silent                | SNP | 37 |
| 6 | MYOC     | uc001ghu.3 | Missense_Mutation     | SNP | 37 |
| 6 | LRP1B    | uc002tvj.1 | Silent                | SNP | 37 |
| 6 | CCT5     | uc011cms.2 | 5'UTR                 | SNP | 37 |
| 6 | VAV2     | uc004ces.3 | Missense_Mutation     | SNP | 37 |
| 6 | TMEM234  | uc009vub.1 | Missense_Mutation     | SNP | 37 |
| 6 | MYH15    | uc003dxa.1 | Missense_Mutation     | SNP | 37 |
| 6 | BLID     | uc001pyf.3 | 5'UTR                 | SNP | 37 |
| 6 | CENPF    | uc001hkm.3 | Missense_Mutation     | SNP | 37 |
| 6 | PCDH17   | uc001vhq.1 | Silent                | SNP | 37 |
| 6 | HYAL4    | uc003vlc.3 | 3'UTR                 | SNP | 37 |
| 6 | MUC17    | uc003uxp.1 | Missense_Mutation     | SNP | 37 |
| 6 | JA040725 | uc022bqs.1 | Intron                | SNP | 37 |
| 6 | TRIOBP   | uc003atr.3 | Missense_Mutation     | SNP | 37 |
| 6 | HDAC5    | uc002iff.1 | Missense_Mutation     | SNP | 37 |
| 6 | JAG2     | uc001yqg.3 | Missense_Mutation     | SNP | 37 |
| 6 | ODZ4     | uc001ozl.4 | Missense_Mutation     | SNP | 37 |
| 6 | BFAR     | uc002dco.3 | 3'UTR                 | SNP | 37 |
| 6 | FAM172BP | uc003duy.1 | Missense_Mutation     | SNP | 37 |
| 6 | MYH9     | uc003apg.3 | Nonsense_Mutation     | SNP | 37 |
| 6 | INPP5D   | uc010zmo.2 | Missense_Mutation     | SNP | 37 |
| 6 | APOA2    | uc001fzc.1 | Silent                | SNP | 37 |
| 6 | ZKSCAN5  | uc003uqv.3 | Missense_Mutation     | SNP | 37 |
| 6 | OR56B4   | uc010qzx.2 | Silent                | SNP | 37 |
| 6 | NR1H3    | uc010rhk.2 | Silent                | SNP | 37 |

|   |          |            |                   |     |    |
|---|----------|------------|-------------------|-----|----|
| 6 | TIMD4    | uc003lwh.2 | Silent            | SNP | 37 |
| 6 | GNAS     | uc002xzw.3 | 3'UTR             | SNP | 37 |
| 6 | HAUS7    | uc004fhn.2 | 5'UTR             | SNP | 37 |
| 6 | TMEM123  | uc001pha.3 | Silent            | SNP | 37 |
| 6 | CCDC120  | uc004dmg.1 | 3'UTR             | SNP | 37 |
| 6 | FAM83D   | uc002xjf.3 | 3'UTR             | SNP | 37 |
| 6 | DNAH14   | uc001how.2 | Silent            | SNP | 37 |
| 6 | FOXL2    | uc003esw.3 | Missense_Mutation | SNP | 37 |
| 6 | TXK      | uc003gxx.4 | Splice_Site       | SNP | 37 |
| 6 | KSR2     | uc001two.2 | Silent            | SNP | 37 |
| 6 | MOV10L1  | uc003bjj.3 | Missense_Mutation | SNP | 37 |
| 6 | BTN3A1   | uc003nhv.3 | Missense_Mutation | SNP | 37 |
| 6 | MYCBP2   | uc021rks.1 | Missense_Mutation | SNP | 37 |
| 6 | GRIN2B   | uc001rbt.2 | Missense_Mutation | SNP | 37 |
| 6 | SNTB2    | uc002ewu.3 | Silent            | SNP | 37 |
| 6 | PRUNE2   | uc010mpk.3 | Missense_Mutation | SNP | 37 |
| 6 | REXO1L1  | uc022axh.1 | 3'UTR             | SNP | 37 |
| 6 | CTNNA3   | uc009xpn.1 | Splice_Site       | SNP | 37 |
| 6 | HIST1H4E | uc003ngy.3 | 3'UTR             | SNP | 37 |
| 6 | C15orf56 | uc001zla.1 | Silent            | SNP | 37 |
| 6 | LIPE     | uc002otr.3 | Intron            | SNP | 37 |
| 6 | EHMT2    | uc011don.1 | Missense_Mutation | SNP | 37 |
| 6 | CEACAM19 | uc002ozo.4 | Missense_Mutation | SNP | 37 |
| 6 | PHRF1    | uc001lqe.3 | Missense_Mutation | SNP | 37 |
| 6 | SLC22A14 | uc010hhc.1 | Missense_Mutation | SNP | 37 |
| 6 | RAX      | uc002lhx.3 | 3'UTR             | SNP | 37 |
| 6 | ZNF569   | uc002ogj.3 | Missense_Mutation | SNP | 37 |
| 6 | KCTD3    | uc001hks.3 | Missense_Mutation | SNP | 37 |
| 6 | EPN3     | uc010wms.2 | Silent            | SNP | 37 |
| 6 | LHCGR    | uc002rwu.4 | Silent            | SNP | 37 |
| 6 | ATP2C2   | uc010chj.3 | Missense_Mutation | SNP | 37 |
| 6 | TRBV2    | uc011kro.1 | Intron            | SNP | 37 |
| 6 | ERN2     | uc002dma.4 | Missense_Mutation | SNP | 37 |
| 6 | LRRCC1   | uc003ycw.3 | Missense_Mutation | SNP | 37 |
| 6 | FAM194A  | uc003eyg.3 | Missense_Mutation | SNP | 37 |
| 6 | KIR2DL2  | uc010yie.2 | Missense_Mutation | SNP | 37 |
| 6 | OBSCN    | uc009xez.1 | Missense_Mutation | SNP | 37 |
| 6 | PRSS53   | uc002eaq.3 | Silent            | SNP | 37 |
| 6 | GSTCD    | uc003hxz.4 | Missense_Mutation | SNP | 37 |
| 6 | SALL2    | uc001wbe.3 | Missense_Mutation | SNP | 37 |
| 6 | HDC      | uc001zxx.3 | Missense_Mutation | SNP | 37 |
| 6 | PDE3A    | uc001reh.2 | Missense_Mutation | SNP | 37 |
| 6 | LHFPL4   | uc003bry.3 | Missense_Mutation | SNP | 37 |

|   |          |            |                   |     |    |
|---|----------|------------|-------------------|-----|----|
| 6 | TNXB     | uc003nzl.2 | Nonsense_Mutation | SNP | 37 |
| 6 | DRD2     | uc001pnz.3 | Silent            | SNP | 37 |
| 6 | TGM6     | uc002wfy.1 | Missense_Mutation | SNP | 37 |
| 6 | MXRA5    | uc004crg.4 | Missense_Mutation | SNP | 37 |
| 6 | KCNB2    | uc003xzb.3 | Missense_Mutation | SNP | 37 |
| 6 | LPO      | uc002ivt.3 | Silent            | SNP | 37 |
| 6 | EBF2     | uc003xet.2 | 3'UTR             | SNP | 37 |
| 6 | DSC1     | uc002kwn.3 | Intron            | SNP | 37 |
| 6 | NCAN     | uc002nlz.3 | Silent            | SNP | 37 |
| 6 | DENND1C  | uc002mfe.3 | Missense_Mutation | SNP | 37 |
| 6 | XKR4     | uc003xsf.3 | Intron            | SNP | 37 |
| 6 | NPR1     | uc001fcs.4 | Silent            | SNP | 37 |
| 6 | FAM208B  | uc001ij.3  | Missense_Mutation | SNP | 37 |
| 6 | BHLHE22  | uc003xvi.3 | Missense_Mutation | SNP | 37 |
| 6 | UNC79    | uc001ybv.1 | Silent            | SNP | 37 |
| 6 | GFM1     | uc003fce.3 | Silent            | SNP | 37 |
| 6 | ASXL3    | uc010dmg.1 | Missense_Mutation | SNP | 37 |
| 6 | KRT74    | uc001sap.1 | Missense_Mutation | SNP | 37 |
| 6 | TUB      | uc001mfy.3 | Missense_Mutation | SNP | 37 |
| 6 | DNAH5    | uc003jfd.2 | Missense_Mutation | SNP | 37 |
| 6 | COL4A4   | uc021vxr.1 | 3'UTR             | SNP | 37 |
| 6 | PKHD1    | uc003pah.1 | Silent            | SNP | 37 |
| 6 | PCDHGC5  | uc003lkq.2 | Silent            | SNP | 37 |
| 6 | TMEM47   | uc004ddh.3 | Silent            | SNP | 37 |
| 6 | CACNA1B  | uc004cog.3 | Intron            | SNP | 37 |
| 6 | CTAGE1   | uc002ktv.1 | Missense_Mutation | SNP | 37 |
| 6 | DCLK3    | uc003cgi.2 | Missense_Mutation | SNP | 37 |
| 6 | DNAH9    | uc002gne.3 | Silent            | SNP | 37 |
| 6 | CCDC162P | uc003ptc.1 | Missense_Mutation | SNP | 37 |
| 6 | SYNE1    | uc021zhb.1 | Missense_Mutation | SNP | 37 |
| 6 | ZNF367   | uc004awf.3 | Silent            | SNP | 37 |
| 6 | C1orf112 | uc001ggp.3 | Silent            | SNP | 37 |
| 6 | PCGF6    | uc001kwt.3 | Silent            | SNP | 37 |
| 6 | SLCO3A1  | uc002bqx.2 | Missense_Mutation | SNP | 37 |
| 6 | MUC16    | uc002mkp.3 | Missense_Mutation | SNP | 37 |
| 6 | NEB      | uc002txu.3 | Silent            | SNP | 37 |
| 6 | GOLGB1   | uc010hrc.3 | Silent            | SNP | 37 |
| 6 | SWT1     | uc001grg.4 | Silent            | SNP | 37 |
| 6 | SGMS1    | uc001jje.3 | Intron            | SNP | 37 |
| 6 | TRPV6    | uc003wbx.2 | Splice_Site       | SNP | 37 |
| 6 | NR2C1    | uc001tdm.4 | Missense_Mutation | SNP | 37 |
| 6 | KRT26    | uc002hvf.3 | Missense_Mutation | SNP | 37 |
| 6 | CST6     | uc001ogr.3 | Missense_Mutation | SNP | 37 |

|   |             |            |                       |     |    |
|---|-------------|------------|-----------------------|-----|----|
| 6 | MSH6        | uc002rwd.4 | Silent                | SNP | 37 |
| 6 | CR1         | uc001hfx.3 | Silent                | SNP | 37 |
| 6 | TAT         | uc002fap.2 | Silent                | SNP | 37 |
| 6 | FPGT-TNNI3K | uc001dge.2 | Silent                | SNP | 37 |
| 6 | Unknown     |            | IGR                   | SNP | 37 |
| 6 | TLX1        | uc001ksw.3 | Silent                | SNP | 37 |
| 6 | IPO7        | uc001mho.3 | Nonsense_Mutation     | SNP | 37 |
| 6 | NALCN       | uc001vox.1 | Silent                | SNP | 37 |
| 6 | TAP1        | uc003ocg.3 | Missense_Mutation     | SNP | 37 |
| 6 | CDC73       | uc001gtb.3 | Splice_Site           | SNP | 37 |
| 6 | B3GALTL     | uc010aaz.3 | Missense_Mutation     | SNP | 37 |
| 6 | DCLK1       | uc001uvf.3 | Missense_Mutation     | SNP | 37 |
| 6 | LAMB4       | uc010ljo.1 | Splice_Site           | SNP | 37 |
| 6 | C15orf55    | uc010ucc.2 | 5'UTR                 | SNP | 37 |
| 6 | CASP14      | uc010dzv.2 | Missense_Mutation     | SNP | 37 |
| 6 | PCYT2       | uc002kce.2 | 5'UTR                 | SNP | 37 |
| 6 | POLA1       | uc004dbl.3 | Missense_Mutation     | SNP | 37 |
| 6 | GFI1        | uc001dou.4 | Nonsense_Mutation     | SNP | 37 |
| 6 | ITGAV       | uc002upq.3 | Missense_Mutation     | SNP | 37 |
| 6 | DHX35       | uc002xjh.3 | Missense_Mutation     | SNP | 37 |
| 6 | HK2         | uc002snd.3 | Missense_Mutation     | SNP | 37 |
| 6 | TAS2R60     | uc011ktg.2 | Missense_Mutation     | SNP | 37 |
| 6 | ZNF518B     | uc003gmn.3 | Missense_Mutation     | SNP | 37 |
| 6 | DHX30       | uc003cru.3 | Missense_Mutation     | SNP | 37 |
| 6 | C22orf34    | uc003biq.3 | Non-coding_Transcript | SNP | 37 |
| 6 | DUSP27      | uc001geb.1 | Silent                | SNP | 37 |
| 6 | NCAPD2      | uc001qoo.2 | Silent                | SNP | 37 |
| 6 | MLL         | uc001ptb.3 | Missense_Mutation     | SNP | 37 |
| 6 | GCKR        | uc002rky.3 | Silent                | SNP | 37 |
| 6 | C20orf166   | uc011aaj.2 | Intron                | SNP | 37 |
| 6 | SLC19A1     | uc002zhl.2 | Missense_Mutation     | SNP | 37 |
| 6 | CPOX        | uc003dsx.3 | Silent                | SNP | 37 |
| 6 | NFASC       | uc001hbj.3 | Missense_Mutation     | SNP | 37 |
| 6 | AGAP2       | uc001spr.3 | Silent                | SNP | 37 |
| 6 | ARHGEF4     | uc010fmw.1 | Missense_Mutation     | SNP | 37 |
| 6 | NPAS2       | uc010yvt.1 | Missense_Mutation     | SNP | 37 |
| 6 | HEATR6      | uc002iyk.1 | Missense_Mutation     | SNP | 37 |
| 6 | MMP16       | uc003yeb.4 | Missense_Mutation     | SNP | 37 |
| 6 | NYAP1       | uc003uvd.1 | Missense_Mutation     | SNP | 37 |
| 6 | EDEM3       | uc010pom.2 | Splice_Site           | SNP | 37 |
| 6 | CACNA1C     | uc009zdw.1 | Missense_Mutation     | SNP | 37 |
| 6 | CABP1       | uc001tyu.3 | 3'UTR                 | SNP | 37 |
| 6 | TNR         | uc001gkp.1 | Missense_Mutation     | SNP | 37 |

|   |              |            |                   |     |    |
|---|--------------|------------|-------------------|-----|----|
| 6 | RBM5         | uc003cyg.3 | Missense_Mutation | SNP | 37 |
| 6 | DHX8         | uc002idu.1 | Silent            | SNP | 37 |
| 6 | DNMT1        | uc010xlc.2 | Missense_Mutation | SNP | 37 |
| 6 | PKDCC        | uc002rsg.3 | Missense_Mutation | SNP | 37 |
| 6 | CDC42BPG     | uc001obs.4 | Missense_Mutation | SNP | 37 |
| 6 | SLIT3        | uc010jgg.3 | Splice_Site       | SNP | 37 |
| 6 | SYNCRIP      | uc003pla.2 | Missense_Mutation | SNP | 37 |
| 6 | GREM2        | uc001hys.3 | Missense_Mutation | SNP | 37 |
| 6 | UST          | uc003qmg.3 | Silent            | SNP | 37 |
| 6 | RAB3GAP2     | uc010puk.1 | Missense_Mutation | SNP | 37 |
| 6 | RANBP17      | uc003mbd.3 | Silent            | SNP | 37 |
| 6 | RAB27B       | uc002lfr.3 | Silent            | SNP | 37 |
| 6 | AKAP13       | uc002blu.1 | Splice_Site       | SNP | 37 |
| 6 | NEU1         | uc003nxq.4 | 3'UTR             | SNP | 37 |
| 6 | BC128131     | uc002nqz.1 | Missense_Mutation | SNP | 37 |
| 6 | CNRIP1       | uc002sej.4 | 3'UTR             | SNP | 37 |
| 6 | MGLL         | uc003ejw.3 | Missense_Mutation | SNP | 37 |
| 6 | KIF21B       | uc001gvs.2 | Silent            | SNP | 37 |
| 6 | CHRM2        | uc003vtf.1 | 3'UTR             | SNP | 37 |
| 6 | ZNF676       | uc002nqs.1 | 5'UTR             | SNP | 37 |
| 6 | MYO1B        | uc010fsg.2 | Silent            | SNP | 37 |
| 6 | AMPH         | uc003tgu.3 | Missense_Mutation | SNP | 37 |
| 6 | TCHP         | uc001tpn.3 | Silent            | SNP | 37 |
| 6 | CCDC76       | uc001dsv.3 | Missense_Mutation | SNP | 37 |
| 6 | NLRP4        | uc002qmd.4 | Nonsense_Mutation | SNP | 37 |
| 6 | C17orf80     | uc002jjm.4 | Missense_Mutation | SNP | 37 |
| 6 | APLP1        | uc002ocf.3 | Missense_Mutation | SNP | 37 |
| 6 | CTAGE1       | uc002ktv.1 | Missense_Mutation | SNP | 37 |
| 6 | LGALS16      | uc021uun.1 | Missense_Mutation | SNP | 37 |
| 6 | NT5C1B-RDH14 | uc010exr.3 | Missense_Mutation | SNP | 37 |
| 6 | GRIN3A       | uc004bbp.2 | Missense_Mutation | SNP | 37 |
| 6 | EIF1AD       | uc021qlr.1 | Missense_Mutation | SNP | 37 |
| 6 | NR2E3        | uc002ati.3 | Missense_Mutation | SNP | 37 |
| 6 | MAPK11       | uc003bkr.3 | Splice_Site       | SNP | 37 |
| 6 | BOD1L2       | uc002lgm.3 | Silent            | SNP | 37 |
| 6 | APOB         | uc002red.3 | Missense_Mutation | SNP | 37 |
| 6 | ALG8         | uc001oza.1 | Missense_Mutation | SNP | 37 |
| 6 | DSC2         | uc002kwl.4 | Missense_Mutation | SNP | 37 |
| 6 | ZNF343       | uc010gao.1 | Silent            | SNP | 37 |
| 6 | DHRS4        | uc010alc.3 | Splice_Site       | SNP | 37 |
| 6 | CHIA         | uc001eas.3 | Silent            | SNP | 37 |
| 6 | GLP2R        | uc002gmd.1 | Silent            | SNP | 37 |
| 6 | AFAP1        | uc011bwk.1 | Missense_Mutation | SNP | 37 |

|   |            |            |                       |     |    |
|---|------------|------------|-----------------------|-----|----|
| 6 | NYAP1      | uc003uud.1 | Silent                | SNP | 37 |
| 6 | KIAA0196   | uc003yrt.3 | Silent                | SNP | 37 |
| 6 | MUC2       | uc001lsx.1 | Missense_Mutation     | SNP | 37 |
| 6 | GYS2       | uc001rfb.3 | 3'UTR                 | SNP | 37 |
| 6 | FBLN2      | uc011ava.2 | Silent                | SNP | 37 |
| 6 | CBLN3      | uc001wpg.4 | Missense_Mutation     | SNP | 37 |
| 6 | PHB2       | uc021qug.1 | Missense_Mutation     | SNP | 37 |
| 6 | BZRAP1     | uc002ivx.4 | Missense_Mutation     | SNP | 37 |
| 6 | KRT6A      | uc001sam.3 | Silent                | SNP | 37 |
| 6 | PRR24      | uc002pgi.3 | Silent                | SNP | 37 |
| 6 | ACMSD      | uc002ttz.3 | Missense_Mutation     | SNP | 37 |
| 6 | ARHGEF26   | uc021xgc.1 | Silent                | SNP | 37 |
| 6 | SP140      | uc002vqj.3 | 3'UTR                 | SNP | 37 |
| 6 | BTG4       | uc001plj.3 | 5'Flank               | SNP | 37 |
| 6 | TNKS       | uc003wss.3 | Missense_Mutation     | SNP | 37 |
| 6 | CTNND2     | uc003jfa.1 | Silent                | SNP | 37 |
| 6 | ASCC3      | uc003pqq.3 | Silent                | SNP | 37 |
| 6 | ZFPL1      | uc001ocq.1 | Missense_Mutation     | SNP | 37 |
| 6 | PDLIM2     | uc003xby.3 | 3'UTR                 | SNP | 37 |
| 6 | RACGAP1P   | uc001rol.3 | Non-coding_Transcript | SNP | 37 |
| 6 | L3MBTL2    | uc003azo.3 | Missense_Mutation     | SNP | 37 |
| 6 | ZNF680     | uc003tta.2 | 5'UTR                 | SNP | 37 |
| 6 | AHCY       | uc002xai.3 | Silent                | SNP | 37 |
| 6 | CAPN2      | uc001hob.4 | Missense_Mutation     | SNP | 37 |
| 6 | TEKT4      | uc002stw.1 | Intron                | SNP | 37 |
| 6 | OBFC2B     | uc001skk.3 | Missense_Mutation     | SNP | 37 |
| 6 | TSIX       | uc004ebn.2 | Non-coding_Transcript | SNP | 37 |
| 6 | UNC13C     | uc021sms.1 | Silent                | SNP | 37 |
| 6 | PPARGC1A   | uc003gqs.3 | Missense_Mutation     | SNP | 37 |
| 6 | CACNA1C    | uc009zdu.1 | Missense_Mutation     | SNP | 37 |
| 6 | DSCAM      | uc002yyq.1 | Missense_Mutation     | SNP | 37 |
| 6 | MAG        | uc002nyy.2 | Missense_Mutation     | SNP | 37 |
| 6 | TTBK1      | uc003ouq.1 | Missense_Mutation     | SNP | 37 |
| 6 | C17orf85   | uc010ckl.1 | Nonsense_Mutation     | SNP | 37 |
| 6 | EDN3       | uc002yap.3 | 3'UTR                 | SNP | 37 |
| 6 | CALCOCO1   | uc001seh.2 | 3'UTR                 | SNP | 37 |
| 6 | WDR64      | uc001hgz.2 | Silent                | SNP | 37 |
| 6 | PCDH15     | uc001jjw.3 | 3'UTR                 | SNP | 37 |
| 6 | CEP192     | uc010xac.2 | Nonsense_Mutation     | SNP | 37 |
| 6 | HMCN1      | uc001grq.1 | Missense_Mutation     | SNP | 37 |
| 6 | GTF2IRD2P1 | uc003txs.1 | Silent                | SNP | 37 |
| 6 | PXDNL      | uc003xqu.4 | Missense_Mutation     | SNP | 37 |
| 6 | TRIM38     | uc003nfm.3 | Missense_Mutation     | SNP | 37 |

|   |           |            |                   |     |    |
|---|-----------|------------|-------------------|-----|----|
| 6 | MAGEB6    | uc004dbr.3 | Missense_Mutation | SNP | 37 |
| 6 | TCRBV3S1  | uc011ksk.1 | Missense_Mutation | SNP | 37 |
| 6 | OR8B4     | uc010sak.2 | Missense_Mutation | SNP | 37 |
| 6 | SNIP1     | uc001cbi.3 | Missense_Mutation | SNP | 37 |
| 6 | FRS2      | uc001suy.3 | Missense_Mutation | SNP | 37 |
| 6 | SLC12A9   | uc003uwv.3 | 5'UTR             | SNP | 37 |
| 6 | TEX101    | uc002owk.3 | Missense_Mutation | SNP | 37 |
| 6 | NCKAP5    | uc002tts.1 | 3'UTR             | SNP | 37 |
| 6 | CAT       | uc001mvm.3 | Missense_Mutation | SNP | 37 |
| 6 | IRX4      | uc003jcz.2 | Silent            | SNP | 37 |
| 6 | PPP3CB    | uc001juf.3 | Missense_Mutation | SNP | 37 |
| 6 | C1orf38   | uc001bpc.4 | Silent            | SNP | 37 |
| 6 | ALDOA     | uc010veg.2 | Silent            | SNP | 37 |
| 6 | FAM5C     | uc001gse.1 | Missense_Mutation | SNP | 37 |
| 6 | RPH3A     | uc010syl.2 | Missense_Mutation | SNP | 37 |
| 6 | MUS81     | uc001ofv.4 | Silent            | SNP | 37 |
| 6 | EXPH5     | uc001pkk.3 | Silent            | SNP | 37 |
| 6 | MYCN      | uc002rci.3 | Nonsense_Mutation | SNP | 37 |
| 6 | ELP3      | uc003xgo.4 | 5'UTR             | SNP | 37 |
| 6 | PYGO2     | uc001fft.3 | Silent            | SNP | 37 |
| 6 | MYOM1     | uc002klp.3 | Missense_Mutation | SNP | 37 |
| 6 | MARK1     | uc009xdw.3 | Missense_Mutation | SNP | 37 |
| 6 | PCSK5     | uc004ajy.2 | Missense_Mutation | SNP | 37 |
| 6 | TMEM63C   | uc001xtf.2 | Silent            | SNP | 37 |
| 6 | ITGAX     | uc002ebt.3 | Silent            | SNP | 37 |
| 6 | GPLD1     | uc003ned.1 | Silent            | SNP | 37 |
| 6 | SHANK2    | uc001oqc.3 | Missense_Mutation | SNP | 37 |
| 6 | C4BPB     | uc009xcd.3 | 3'UTR             | SNP | 37 |
| 6 | HYDIN     | uc002ezr.3 | Silent            | SNP | 37 |
| 6 | SPOP      | uc010dbk.3 | Missense_Mutation | SNP | 37 |
| 6 | ITGA11    | uc010bib.3 | Silent            | SNP | 37 |
| 6 | CHRDL2    | uc001ovh.3 | 5'UTR             | SNP | 37 |
| 6 | C12orf53  | uc021quc.1 | Missense_Mutation | SNP | 37 |
| 6 | DCLK3     | uc003cgi.2 | Missense_Mutation | SNP | 37 |
| 6 | AZIN1     | uc003yky.3 | Missense_Mutation | SNP | 37 |
| 6 | CDH7      | uc002ljz.3 | Missense_Mutation | SNP | 37 |
| 6 | ADAM2     | uc003xnj.3 | 5'UTR             | SNP | 37 |
| 6 | C13orf33  | uc001uth.4 | 3'UTR             | SNP | 37 |
| 6 | SQLE      | uc011liq.2 | Nonsense_Mutation | SNP | 37 |
| 6 | PCDHAC2   | uc003lii.3 | 3'UTR             | SNP | 37 |
| 6 | THSD7B    | uc002tva.1 | Missense_Mutation | SNP | 37 |
| 6 | C20orf151 | uc002ycw.2 | Silent            | SNP | 37 |
| 6 | WFDC1     | uc002fhv.3 | Missense_Mutation | SNP | 37 |

|   |          |            |                   |     |    |
|---|----------|------------|-------------------|-----|----|
| 6 | C4BPB    | uc009xcd.3 | Nonsense_Mutation | SNP | 37 |
| 6 | C8orf49  | uc003wud.1 | Missense_Mutation | SNP | 37 |
| 6 | ZC3H7B   | uc003azw.3 | Silent            | SNP | 37 |
| 6 | RNASE6   | uc001vye.4 | Silent            | SNP | 37 |
| 6 | AX746604 | uc001ogu.1 | 3'UTR             | SNP | 37 |
| 6 | TRIM22   | uc001mbr.3 | Silent            | SNP | 37 |
| 6 | INSC     | uc001mly.3 | Missense_Mutation | SNP | 37 |
| 6 | PHKA1    | uc004eax.4 | Missense_Mutation | SNP | 37 |
| 6 | SNAI2    | uc003xqp.3 | 5'UTR             | SNP | 37 |
| 6 | PRR16    | uc003ksq.3 | Missense_Mutation | SNP | 37 |
| 6 | CCDC141  | uc002une.2 | Missense_Mutation | SNP | 37 |
| 6 | TRBV2    | uc011kro.1 | Intron            | SNP | 37 |
| 6 | IGHE     | uc001yrw.1 | Intron            | SNP | 37 |
| 6 | AQP6     | uc001rvr.1 | 3'UTR             | SNP | 37 |
| 6 | DNAH9    | uc002gne.3 | Missense_Mutation | SNP | 37 |
| 6 | NXF5     | uc011mrk.1 | 5'UTR             | SNP | 37 |
| 6 | UGT3A1   | uc003jiv.2 | Missense_Mutation | SNP | 37 |
| 6 | KALRN    | uc003ehg.3 | Silent            | SNP | 37 |
| 6 | SLC8A2   | uc010ele.3 | Silent            | SNP | 37 |
| 6 | AHNAK    | uc001ntl.3 | Silent            | SNP | 37 |
| 6 | CDC42EP4 | uc002jnn.3 | Silent            | SNP | 37 |
| 6 | TCRBV3S1 | uc003wag.2 | 3'UTR             | SNP | 37 |
| 6 | PHRF1    | uc001lqe.3 | Missense_Mutation | SNP | 37 |
| 6 | OR51M1   | uc010qzc.2 | Missense_Mutation | SNP | 37 |
| 6 | CDCA4    | uc001yqa.2 | Missense_Mutation | SNP | 37 |
| 6 | CAMTA1   | uc001aoi.3 | Missense_Mutation | SNP | 37 |
| 6 | FBLIM1   | uc001axg.1 | Silent            | SNP | 37 |
| 6 | IQGAP2   | uc003kek.3 | Missense_Mutation | SNP | 37 |
| 6 | MLL3     | uc003wla.3 | Missense_Mutation | SNP | 37 |
| 6 | IL1RAPL2 | uc004elz.1 | Missense_Mutation | SNP | 37 |
| 6 | OPN1SW   | uc003vnt.4 | Missense_Mutation | SNP | 37 |
| 6 | GATS     | uc003uua.4 | Intron            | SNP | 37 |
| 6 | HMGCLL1  | uc003pcn.3 | Missense_Mutation | SNP | 37 |
| 6 | FTSJD1   | uc010cga.3 | Missense_Mutation | SNP | 37 |
| 6 | OR51G2   | uc001lzt.1 | Missense_Mutation | SNP | 37 |
| 6 | CHRM2    | uc003vtf.1 | Missense_Mutation | SNP | 37 |
| 6 | C19orf59 | uc002mhh.1 | 3'UTR             | SNP | 37 |
| 6 | SIRPD    | uc002wfi.3 | Missense_Mutation | SNP | 37 |
| 6 | RAB3C    | uc003jrp.3 | Silent            | SNP | 37 |
| 6 | LRP2     | uc002ues.3 | Missense_Mutation | SNP | 37 |
| 6 | HTR3A    | uc010rxb.2 | Nonsense_Mutation | SNP | 37 |
| 6 | DLEC1    | uc003chr.1 | 5'UTR             | SNP | 37 |
| 6 | SHMT1    | uc002gta.3 | Missense_Mutation | SNP | 37 |



|   |           |            |                   |     |    |
|---|-----------|------------|-------------------|-----|----|
| 6 | LCT       | uc002tuu.1 | Nonsense_Mutation | SNP | 37 |
| 6 | USP6      | uc002gau.1 | Missense_Mutation | SNP | 37 |
| 6 | ASRGL1    | uc001ntf.4 | 5'UTR             | SNP | 37 |
| 6 | SPRR2G    | uc009wod.2 | 3'UTR             | SNP | 37 |
| 6 | STK36     | uc002viu.3 | Missense_Mutation | SNP | 37 |
| 6 | TRPM6     | uc004ajl.1 | Missense_Mutation | SNP | 37 |
| 6 | FTCD      | uc002zig.3 | Silent            | SNP | 37 |
| 6 | VWA3B     | uc002syo.3 | Missense_Mutation | SNP | 37 |
| 6 | GAL3ST3   | uc001ogv.3 | Missense_Mutation | SNP | 37 |
| 6 | OR51D1    | uc010qyk.2 | Missense_Mutation | SNP | 37 |
| 6 | ADCYAP1R1 | uc003tcg.3 | Silent            | SNP | 37 |
| 6 | MRPS31    | uc001uxm.4 | Silent            | SNP | 37 |
| 6 | CD2AP     | uc003oyw.3 | 3'UTR             | SNP | 37 |
| 6 | CCDC168   | uc001vpm.3 | Silent            | SNP | 37 |
| 6 | NMUR2     | uc003luv.2 | Silent            | SNP | 37 |
| 6 | MOK       | uc001ylm.3 | 5'UTR             | SNP | 37 |
| 6 | SPATA13   | uc001upd.2 | Missense_Mutation | SNP | 37 |
| 6 | FGD5      | uc003bzc.3 | Missense_Mutation | SNP | 37 |
| 6 | PDGFB     | uc003axf.3 | Missense_Mutation | SNP | 37 |
| 6 | PIWIL3    | uc011ajy.1 | 5'UTR             | SNP | 37 |
| 6 | PELO      | uc003jos.3 | Silent            | SNP | 37 |
| 6 | PRC1      | uc002bqm.3 | Silent            | SNP | 37 |
| 6 | CACNA2D3  | uc003dhf.3 | Intron            | SNP | 37 |
| 6 | TPTEP1    | uc002zls.1 | Intron            | SNP | 37 |
| 6 | MYOM1     | uc002klp.3 | Silent            | SNP | 37 |
| 6 | DNMT3A    | uc002rgc.3 | Missense_Mutation | SNP | 37 |
| 6 | MGA       | uc010ucy.2 | Silent            | SNP | 37 |
| 6 | KRT24     | uc002hvd.3 | Missense_Mutation | SNP | 37 |
| 6 | ODF1      | uc003ykt.2 | Missense_Mutation | SNP | 37 |
| 6 | HEATR1    | uc001hyd.2 | Silent            | SNP | 37 |
| 6 | PLK1      | uc002dlz.1 | Missense_Mutation | SNP | 37 |
| 6 | EPHB1     | uc003eqt.3 | Missense_Mutation | SNP | 37 |
| 6 | EHMT2     | uc011don.1 | Missense_Mutation | SNP | 37 |
| 6 | OR5E1P    | uc001mfr.3 | Silent            | SNP | 37 |
| 6 | SLC22A25  | uc001nwr.1 | Missense_Mutation | SNP | 37 |
| 6 | ARRDC4    | uc010bom.3 | 3'UTR             | SNP | 37 |
| 6 | PHRF1     | uc001lqe.3 | Silent            | SNP | 37 |
| 6 | SH3BP5    | uc003bzp.1 | Missense_Mutation | SNP | 37 |
| 6 | TMEM163   | uc002ttx.3 | Silent            | SNP | 37 |
| 6 | VSTM2A    | uc022adk.1 | Missense_Mutation | SNP | 37 |
| 6 | FAM181A   | uc001ybz.2 | Silent            | SNP | 37 |
| 6 | SLC41A2   | uc001tla.3 | Missense_Mutation | SNP | 37 |
| 6 | NOL4      | uc010dmi.3 | 5'UTR             | SNP | 37 |

|   |           |            |                   |     |    |
|---|-----------|------------|-------------------|-----|----|
| 6 | UPF1      | uc002nkg.3 | Silent            | SNP | 37 |
| 6 | PSMB10    | uc002eux.2 | Splice_Site       | SNP | 37 |
| 6 | RGPD4     | uc010ywk.2 | 3'UTR             | SNP | 37 |
| 6 | ZBTB47    | uc003clu.2 | Silent            | SNP | 37 |
| 6 | EYS       | uc011dxu.1 | Missense_Mutation | SNP | 37 |
| 6 | ADAMTS9   | uc003dmg.3 | Missense_Mutation | SNP | 37 |
| 6 | REG1A     | uc010ffx.1 | 3'UTR             | SNP | 37 |
| 6 | MAFB      | uc002xji.3 | Silent            | SNP | 37 |
| 6 | SNX9      | uc003qqv.1 | Splice_Site       | SNP | 37 |
| 6 | TSHR      | uc001xvd.1 | Missense_Mutation | SNP | 37 |
| 6 | HNF1B     | uc021tvv.1 | Missense_Mutation | SNP | 37 |
| 6 | POM121L2  | uc011dku.1 | Missense_Mutation | SNP | 37 |
| 6 | ARRDC2    | uc002nhv.3 | Missense_Mutation | SNP | 37 |
| 6 | SCT       | uc001lqo.1 | 3'UTR             | SNP | 37 |
| 6 | UBR2      | uc011dur.2 | Silent            | SNP | 37 |
| 6 | GLIS1     | uc001cvr.1 | Silent            | SNP | 37 |
| 6 | MSLNL     | uc002cjz.1 | Missense_Mutation | SNP | 37 |
| 6 | PTPRT     | uc010ggj.3 | Missense_Mutation | SNP | 37 |
| 6 | EPPK1     | uc003zaa.1 | Missense_Mutation | SNP | 37 |
| 6 | MYO10     | uc003jft.4 | Silent            | SNP | 37 |
| 6 | SORCS3    | uc001kyi.1 | Missense_Mutation | SNP | 37 |
| 6 | C11orf9   | uc001nsc.1 | Silent            | SNP | 37 |
| 6 | MAPK10    | uc003hps.3 | Missense_Mutation | SNP | 37 |
| 6 | LAD1      | uc001gwm.3 | 3'UTR             | SNP | 37 |
| 6 | TEX2      | uc002jed.3 | Silent            | SNP | 37 |
| 6 | SNRPE     | uc001hai.3 | Missense_Mutation | SNP | 37 |
| 6 | ONECUT3   | uc010xgr.2 | Missense_Mutation | SNP | 37 |
| 6 | LBR       | uc001hoy.3 | Silent            | SNP | 37 |
| 6 | SVOP      | uc010sxh.1 | Silent            | SNP | 37 |
| 6 | PDGFB     | uc003axf.3 | Silent            | SNP | 37 |
| 6 | RBM15B    | uc003dbd.3 | Missense_Mutation | SNP | 37 |
| 6 | SIGLEC14  | uc002pxf.4 | Missense_Mutation | SNP | 37 |
| 6 | AP2A2     | uc001lst.2 | 3'UTR             | SNP | 37 |
| 6 | WWC3      | uc004csx.4 | Missense_Mutation | SNP | 37 |
| 6 | ELP4      | uc001mtc.3 | Silent            | SNP | 37 |
| 6 | TBX21     | uc002ilv.1 | Missense_Mutation | SNP | 37 |
| 6 | MXRA5     | uc004crg.4 | Missense_Mutation | SNP | 37 |
| 6 | SEMA5A    | uc003jek.2 | Missense_Mutation | SNP | 37 |
| 6 | WISP2     | uc002xmp.3 | Missense_Mutation | SNP | 37 |
| 6 | C17orf102 | uc002hie.1 | Missense_Mutation | SNP | 37 |
| 6 | SNRPD2    | uc002pcw.3 | 5'UTR             | SNP | 37 |
| 6 | ALPK3     | uc002ble.3 | Missense_Mutation | SNP | 37 |
| 6 | SPINT1    | uc001zna.3 | 5'UTR             | SNP | 37 |

|   |           |            |                       |     |    |
|---|-----------|------------|-----------------------|-----|----|
| 6 | TOM1L2    | uc002grz.4 | 3'UTR                 | SNP | 37 |
| 6 | DZIP1L    | uc003erq.3 | Missense_Mutation     | SNP | 37 |
| 6 | FLT4      | uc003mlz.4 | Silent                | SNP | 37 |
| 6 | PLCB1     | uc002wnb.3 | Missense_Mutation     | SNP | 37 |
| 6 | PIK3C2G   | uc010sib.2 | Missense_Mutation     | SNP | 37 |
| 6 | FCAMR     | uc001hfa.4 | 5'UTR                 | SNP | 37 |
| 6 | TTLL2     | uc003qvs.1 | Silent                | SNP | 37 |
| 6 | KIAA1731  | uc009ywb.1 | Silent                | SNP | 37 |
| 6 | TGM1      | uc001wod.3 | Missense_Mutation     | SNP | 37 |
| 6 | PLEKHH2   | uc010yny.2 | Missense_Mutation     | SNP | 37 |
| 6 | LMO7      | uc021rkq.1 | Missense_Mutation     | SNP | 37 |
| 6 | abParts   | uc021wmm.1 | Intron                | SNP | 37 |
| 6 | NRG2      | uc003lev.2 | Silent                | SNP | 37 |
| 6 | SLC39A5   | uc010sqj.2 | Silent                | SNP | 37 |
| 6 | FEZ1      | uc001qbx.3 | Silent                | SNP | 37 |
| 6 | SYNPO2L   | uc001jut.4 | Silent                | SNP | 37 |
| 6 | C1orf177  | uc001cyb.4 | Nonsense_Mutation     | SNP | 37 |
| 6 | ABCA9     | uc002jhu.3 | Silent                | SNP | 37 |
| 6 | QRSL1     | uc003prl.2 | Silent                | SNP | 37 |
| 6 | MAML1     | uc003mkm.3 | Missense_Mutation     | SNP | 37 |
| 6 | MPP4      | uc002uym.1 | 3'UTR                 | SNP | 37 |
| 6 | PLXNA1    | uc003ejg.3 | Silent                | SNP | 37 |
| 6 | PCDHB7    | uc003lit.3 | Silent                | SNP | 37 |
| 6 | ATG9A     | uc002vke.1 | Missense_Mutation     | SNP | 37 |
| 6 | SLC9A1    | uc001bnm.3 | Silent                | SNP | 37 |
| 6 | KCNB2     | uc003xzb.3 | Missense_Mutation     | SNP | 37 |
| 6 | RNF220    | uc001clv.1 | Silent                | SNP | 37 |
| 6 | SAMSN1    | uc002yfv.1 | Silent                | SNP | 37 |
| 6 | MS4A4A    | uc001npa.3 | 5'UTR                 | SNP | 37 |
| 6 | CPA4      | uc003vpr.3 | Nonsense_Mutation     | SNP | 37 |
| 6 | LOC650623 | uc010qlu.2 | Non-coding_Transcript | SNP | 37 |
| 6 | PSD4      | uc002tjc.3 | Missense_Mutation     | SNP | 37 |
| 6 | A2M       | uc001qvk.1 | Silent                | SNP | 37 |
| 6 | FMNL1     | uc002iin.3 | Missense_Mutation     | SNP | 37 |
| 6 | AMH       | uc002lvh.2 | Silent                | SNP | 37 |
| 6 | WSCD1     | uc010cli.3 | Missense_Mutation     | SNP | 37 |
| 6 | NHSL1     | uc003qhx.3 | Silent                | SNP | 37 |
| 6 | ZNF536    | uc002nsu.1 | Missense_Mutation     | SNP | 37 |
| 6 | PSMC6     | uc010tqx.2 | Missense_Mutation     | SNP | 37 |
| 6 | CAPN9     | uc001htz.1 | Missense_Mutation     | SNP | 37 |
| 6 | ELOVL4    | uc003pja.4 | Missense_Mutation     | SNP | 37 |
| 6 | CREB3L2   | uc003vtw.3 | Silent                | SNP | 37 |
| 6 | AP3S1     | uc003krl.3 | Missense_Mutation     | SNP | 37 |

|   |           |            |                       |     |    |
|---|-----------|------------|-----------------------|-----|----|
| 6 | EYS       | uc011dxu.1 | Silent                | SNP | 37 |
| 6 | WFDC12    | uc002xfn.1 | Silent                | SNP | 37 |
| 6 | ZNF142    | uc002vin.3 | Missense_Mutation     | SNP | 37 |
| 6 | HYDIN     | uc002ezr.3 | Missense_Mutation     | SNP | 37 |
| 6 | OR52B4    | uc010qye.2 | Missense_Mutation     | SNP | 37 |
| 6 | FAM171A1  | uc001iob.3 | Missense_Mutation     | SNP | 37 |
| 6 | SH3TC2    | uc003lpu.3 | Silent                | SNP | 37 |
| 6 | C1QTNF9   | uc001upj.3 | Missense_Mutation     | SNP | 37 |
| 6 | KLK15     | uc002ptl.3 | Missense_Mutation     | SNP | 37 |
| 6 | RAB33A    | uc004evl.3 | Missense_Mutation     | SNP | 37 |
| 6 | C10orf112 | uc010qcq.1 | Missense_Mutation     | SNP | 37 |
| 6 | PIK3CB    | uc011bmq.2 | Missense_Mutation     | SNP | 37 |
| 6 | VCX3B     | uc011mht.2 | Silent                | SNP | 37 |
| 6 | SEPT8     | uc003kxr.2 | Silent                | SNP | 37 |
| 6 | ZNF229    | uc002oze.1 | Silent                | SNP | 37 |
| 6 | THBS1     | uc001zkh.3 | Missense_Mutation     | SNP | 37 |
| 6 | GIGYF1    | uc003uwg.1 | 5'UTR                 | SNP | 37 |
| 6 | GNB2L1    | uc003mni.1 | Intron                | SNP | 37 |
| 6 | OSBPL6    | uc002uly.3 | Missense_Mutation     | SNP | 37 |
| 6 | ABCB5     | uc010kuh.3 | Nonsense_Mutation     | SNP | 37 |
| 6 | HCN1      | uc003jok.3 | Nonsense_Mutation     | SNP | 37 |
| 6 | PIK3C2A   | uc001mmq.4 | Missense_Mutation     | SNP | 37 |
| 6 | SAMD9     | uc003umf.3 | Missense_Mutation     | SNP | 37 |
| 6 | RNF126    | uc010drs.3 | Silent                | SNP | 37 |
| 6 | PLA2G4E   | uc021sjp.1 | Silent                | SNP | 37 |
| 6 | AC2       | uc001ezm.1 | Non-coding_Transcript | SNP | 37 |
| 6 | SLC12A6   | uc001zhv.3 | Missense_Mutation     | SNP | 37 |
| 6 | ZNF549    | uc002qpb.2 | 5'UTR                 | SNP | 37 |
| 6 | MUC16     | uc002mkp.3 | Silent                | SNP | 37 |
| 6 | RYR2      | uc001hyl.1 | Missense_Mutation     | SNP | 37 |
| 6 | OR5M9     | uc010rjj.2 | Missense_Mutation     | SNP | 37 |
| 6 | WDR69     | uc002vpn.1 | Splice_Site           | SNP | 37 |
| 6 | ZNF18     | uc002gng.1 | Missense_Mutation     | SNP | 37 |
| 6 | FMO1      | uc009wvz.3 | Missense_Mutation     | SNP | 37 |
| 6 | PRKRA     | uc002umc.3 | 5'UTR                 | SNP | 37 |
| 6 | ALPK3     | uc002ble.3 | Missense_Mutation     | SNP | 37 |
| 6 | JUP       | uc010wfs.2 | Intron                | SNP | 37 |
| 6 | PCDHAC2   | uc003lic.2 | Silent                | SNP | 37 |
| 6 | RIMS2     | uc003yls.3 | Missense_Mutation     | SNP | 37 |
| 6 | PPP2R4    | uc011mbo.2 | Silent                | SNP | 37 |
| 6 | SETMAR    | uc011asp.2 | Missense_Mutation     | SNP | 37 |
| 6 | FBLN5     | uc010aue.3 | Splice_Site           | SNP | 37 |
| 6 | PSG3      | uc002ovd.1 | Missense_Mutation     | SNP | 37 |

|   |           |            |                   |     |    |
|---|-----------|------------|-------------------|-----|----|
| 6 | AOAH      | uc022abu.1 | Silent            | SNP | 37 |
| 6 | TLL1      | uc011cjn.2 | Silent            | SNP | 37 |
| 6 | ALG1      | uc002cym.3 | Missense_Mutation | SNP | 37 |
| 6 | HCN3      | uc001fjz.1 | Missense_Mutation | SNP | 37 |
| 6 | Unknown   |            | IGR               | SNP | 37 |
| 6 | MTUS2     | uc001usl.4 | Silent            | SNP | 37 |
| 6 | STAP2     | uc002mac.3 | Missense_Mutation | SNP | 37 |
| 6 | TNPO1     | uc003kck.4 | 5'UTR             | SNP | 37 |
| 6 | POTEE     | uc002tsn.2 | Silent            | SNP | 37 |
| 6 | CDH10     | uc003jgr.2 | Missense_Mutation | SNP | 37 |
| 6 | SERPIND1  | uc002ztc.2 | Missense_Mutation | SNP | 37 |
| 6 | ERC2      | uc021wzo.1 | Missense_Mutation | SNP | 37 |
| 6 | DUSP13    | uc001jws.3 | Missense_Mutation | SNP | 37 |
| 6 | OR2A5     | uc011ktw.2 | Missense_Mutation | SNP | 37 |
| 6 | FAM135A   | uc003pfm.1 | 3'UTR             | SNP | 37 |
| 6 | Unknown   |            | IGR               | SNP | 37 |
| 6 | TSPY26P   | uc002wxm.1 | Missense_Mutation | SNP | 37 |
| 6 | PRLHR     | uc001ldp.1 | Missense_Mutation | SNP | 37 |
| 6 | TJAP1     | uc003ovd.2 | Silent            | SNP | 37 |
| 6 | SLC15A2   | uc003eep.2 | Missense_Mutation | SNP | 37 |
| 6 | NXF5      | uc011mrk.1 | Silent            | SNP | 37 |
| 6 | SDCBP2    | uc010gac.2 | Silent            | SNP | 37 |
| 6 | C17orf104 | uc002iha.3 | Nonsense_Mutation | SNP | 37 |
| 6 | PLXNA4    | uc003vra.4 | Missense_Mutation | SNP | 37 |
| 6 | CCDC120   | uc011mmr.2 | Silent            | SNP | 37 |
| 6 | HS3ST4    | uc002dof.3 | Missense_Mutation | SNP | 37 |
| 6 | HCRTR1    | uc009vtx.2 | Silent            | SNP | 37 |
| 6 | LAMC3     | uc004caa.1 | Missense_Mutation | SNP | 37 |
| 6 | LOC649305 | uc003wvy.3 | Intron            | SNP | 37 |
| 6 | POM121    | uc003twk.2 | Missense_Mutation | SNP | 37 |
| 6 | ZSCAN10   | uc002ctv.1 | Missense_Mutation | SNP | 37 |
| 6 | KLK4      | uc002pua.1 | 3'UTR             | SNP | 37 |
| 6 | DCAF15    | uc002mxt.3 | Missense_Mutation | SNP | 37 |
| 6 | KRBA1     | uc003wfv.3 | Missense_Mutation | SNP | 37 |
| 6 | CSMD2     | uc001bxm.1 | Silent            | SNP | 37 |
| 6 | KCNF1     | uc002rax.3 | Silent            | SNP | 37 |
| 6 | ATP8A2    | uc001uqk.3 | Missense_Mutation | SNP | 37 |
| 6 | GABRB3    | uc001zbb.3 | Silent            | SNP | 37 |
| 6 | COG4      | uc002ezc.3 | Silent            | SNP | 37 |
| 6 | PDE10A    | uc003quo.3 | Missense_Mutation | SNP | 37 |
| 6 | FAM75A6   | uc011lrb.2 | Missense_Mutation | SNP | 37 |
| 6 | F11R      | uc001fxh.4 | 3'UTR             | SNP | 37 |
| 6 | UGT2B10   | uc011cao.1 | Missense_Mutation | SNP | 37 |

|   |           |             |                   |     |    |
|---|-----------|-------------|-------------------|-----|----|
| 6 | SPSB4     | uc010hum.3  | Missense_Mutation | SNP | 37 |
| 6 | SMR3A     | uc011cas.2  | Missense_Mutation | SNP | 37 |
| 6 | ADAMTS2   | uc003mjw.3  | Silent            | SNP | 37 |
| 6 | CCDC132   | uc003umo.3  | 5'UTR             | SNP | 37 |
| 6 | NDST4     | uc003ibu.3  | Missense_Mutation | SNP | 37 |
| 6 | ADCY8     | uc003ytd.4  | Silent            | SNP | 37 |
| 6 | DNAH3     | uc010vbe.2  | Silent            | SNP | 37 |
| 6 | ZG16B     | uc002cru.3  | Silent            | SNP | 37 |
| 6 | TRPC5     | uc004ep1.1  | Silent            | SNP | 37 |
| 6 | C1orf38   | uc001bpc.4  | Silent            | SNP | 37 |
| 6 | BAI3      | uc010kak.3  | Missense_Mutation | SNP | 37 |
| 6 | FBN3      | uc002mjf.3  | Missense_Mutation | SNP | 37 |
| 6 | SLC17A4   | uc003nfe.3  | 5'UTR             | SNP | 37 |
| 6 | DNAI2     | uc002j kf.3 | Silent            | SNP | 37 |
| 6 | SIN3A     | uc002bai.3  | Missense_Mutation | SNP | 37 |
| 6 | RANBP10   | uc002eud.3  | 3'UTR             | SNP | 37 |
| 6 | TTI1      | uc002xhl.3  | Silent            | SNP | 37 |
| 6 | EDC4      | uc002eut.1  | 3'UTR             | SNP | 37 |
| 6 | KRTAP21-2 | uc011adh.2  | Missense_Mutation | SNP | 37 |
| 6 | PLXNB2    | uc003bkv.4  | Missense_Mutation | SNP | 37 |
| 6 | SLC12A1   | uc001zwn.4  | Missense_Mutation | SNP | 37 |
| 6 | GPR112    | uc004ezu.1  | Silent            | SNP | 37 |
| 6 | DNAH5     | uc003jfd.2  | Missense_Mutation | SNP | 37 |
| 6 | CXXC4     | uc003h xg.3 | Silent            | SNP | 37 |
| 6 | ASCC1     | uc001jst.2  | Missense_Mutation | SNP | 37 |
| 6 | DLX4      | uc002ipv.3  | Silent            | SNP | 37 |
| 6 | FAM123C   | uc002trw.2  | Missense_Mutation | SNP | 37 |
| 6 | LRP2      | uc002ues.3  | Nonsense_Mutation | SNP | 37 |
| 6 | PPARA     | uc003bgw.1  | Missense_Mutation | SNP | 37 |
| 6 | DIP2C     | uc001ifp.3  | Silent            | SNP | 37 |
| 6 | LILRA1    | uc002qgh.1  | Missense_Mutation | SNP | 37 |
| 6 | PCNT      | uc002zji.4  | 3'UTR             | SNP | 37 |
| 6 | NFKB1     | uc011cep.2  | 3'UTR             | SNP | 37 |
| 6 | ANKIB1    | uc003ulw.2  | Nonsense_Mutation | SNP | 37 |
| 6 | TTN       | uc021v sy.1 | Missense_Mutation | SNP | 37 |
| 6 | CNOT3     | uc002q dj.2 | Missense_Mutation | SNP | 37 |
| 6 | TEX2      | uc002jed.3  | Missense_Mutation | SNP | 37 |
| 6 | COL17A1   | uc001kxr.3  | Missense_Mutation | SNP | 37 |
| 6 | TNRC6C    | uc002juf.2  | Missense_Mutation | SNP | 37 |
| 6 | GLTSCR2   | uc002phm.2  | Intron            | SNP | 37 |
| 6 | NKD2      | uc003jbt.1  | Missense_Mutation | SNP | 37 |
| 6 | CR2       | uc001hfv.3  | Missense_Mutation | SNP | 37 |
| 6 | EMG1      | uc001qsh.4  | 5'UTR             | SNP | 37 |

|   |           |            |                       |     |    |
|---|-----------|------------|-----------------------|-----|----|
| 6 | PPP4R1L   | uc002xyw.3 | Non-coding_Transcript | SNP | 37 |
| 6 | POM121L2  | uc011dku.1 | Missense_Mutation     | SNP | 37 |
| 6 | AX747187  | uc001ter.1 | 5'UTR                 | SNP | 37 |
| 6 | RPS23     | uc003khu.3 | 3'UTR                 | SNP | 37 |
| 6 | LRRC1     | uc003pcd.1 | Silent                | SNP | 37 |
| 6 | FAM55A    | uc001ppb.1 | Missense_Mutation     | SNP | 37 |
| 6 | AAK1      | uc002sfp.2 | 3'UTR                 | SNP | 37 |
| 6 | MUC3A     | uc003uxl.1 | Missense_Mutation     | SNP | 37 |
| 6 | LIMK1     | uc003uaa.2 | Missense_Mutation     | SNP | 37 |
| 6 | SLC45A4   | uc003ywd.1 | Missense_Mutation     | SNP | 37 |
| 6 | LRRC4C    | uc001mxa.1 | Missense_Mutation     | SNP | 37 |
| 6 | ZNF525    | uc010eqn.3 | 3'UTR                 | SNP | 37 |
| 6 | BCOR      | uc004den.4 | Silent                | SNP | 37 |
| 6 | FOXP1     | uc003dos.3 | Missense_Mutation     | SNP | 37 |
| 6 | SLCO1B1   | uc001req.4 | Splice_Site           | SNP | 37 |
| 6 | LOC649305 | uc003wvy.3 | Intron                | SNP | 37 |
| 6 | PTPRT     | uc010ggj.3 | Missense_Mutation     | SNP | 37 |
| 6 | ACO1      | uc003zqw.4 | Missense_Mutation     | SNP | 37 |
| 6 | CR627148  | uc004aec.3 | Non-coding_Transcript | SNP | 37 |
| 6 | MYLK      | uc003ego.3 | Splice_Site           | SNP | 37 |
| 6 | FER1L6    | uc003yqw.3 | Silent                | SNP | 37 |
| 6 | FAM175B   | uc001lib.4 | Nonsense_Mutation     | SNP | 37 |
| 6 | CMYA5     | uc003kgc.3 | 5'UTR                 | SNP | 37 |
| 6 | CNTN1     | uc001rmm.1 | 3'UTR                 | SNP | 37 |
| 6 | SFTA2     | uc003nsf.3 | 5'UTR                 | SNP | 37 |
| 6 | AKR1D1    | uc003vtz.3 | 3'UTR                 | SNP | 37 |
| 6 | STK31     | uc003sws.4 | Missense_Mutation     | SNP | 37 |
| 6 | CSRNP3    | uc002udf.3 | Missense_Mutation     | SNP | 37 |
| 6 | NELL1     | uc001mqh.3 | Silent                | SNP | 37 |
| 6 | CCBE1     | uc002lib.3 | 3'UTR                 | SNP | 37 |
| 6 | ZNF418    | uc002qqs.1 | Missense_Mutation     | SNP | 37 |
| 6 | NEFL      | uc003xee.3 | Missense_Mutation     | SNP | 37 |
| 6 | ZNF479    | uc010kzo.3 | Missense_Mutation     | SNP | 37 |
| 6 | C1orf227  | uc001hjq.3 | Missense_Mutation     | SNP | 37 |
| 6 | TTI2      | uc003xjl.4 | Missense_Mutation     | SNP | 37 |
| 6 | SERPINI2  | uc003fes.1 | Missense_Mutation     | SNP | 37 |
| 6 | TCF12     | uc002aea.3 | Missense_Mutation     | SNP | 37 |
| 6 | OR8B12    | uc010sam.2 | Silent                | SNP | 37 |
| 6 | PHACTR2   | uc010khi.3 | Silent                | SNP | 37 |
| 6 | OSBPL5    | uc001lxx.2 | Silent                | SNP | 37 |
| 6 | ABCA7     | uc002lqw.4 | Missense_Mutation     | SNP | 37 |
| 6 | PSG8      | uc002ouh.3 | 3'UTR                 | SNP | 37 |
| 6 | ZNF780A   | uc010xvh.2 | Silent                | SNP | 37 |

|   |              |            |                   |     |    |
|---|--------------|------------|-------------------|-----|----|
| 6 | PXDNL        | uc003xqu.4 | Missense_Mutation | SNP | 37 |
| 6 | LOC283788    | uc022brb.1 | Intron            | SNP | 37 |
| 6 | TBX18        | uc003pkl.1 | Silent            | SNP | 37 |
| 6 | CES5A        | uc021tir.1 | Silent            | SNP | 37 |
| 6 | ZNF560       | uc002mlp.1 | Missense_Mutation | SNP | 37 |
| 6 | FIS1         | uc003uyj.4 | Missense_Mutation | SNP | 37 |
| 6 | LOC645166    | uc010pbc.1 | Splice_Site       | SNP | 37 |
| 6 | PIP5K1B      | uc004agu.3 | Missense_Mutation | SNP | 37 |
| 6 | FAM47B       | uc004ddi.2 | Missense_Mutation | SNP | 37 |
| 6 | A2LD1        | uc001vor.3 | Missense_Mutation | SNP | 37 |
| 6 | NEDD4L       | uc002lgy.3 | Silent            | SNP | 37 |
| 6 | ABCA12       | uc002vew.3 | Missense_Mutation | SNP | 37 |
| 6 | MAU2         | uc002nmk.4 | Missense_Mutation | SNP | 37 |
| 6 | TAF1         | uc010nlf.1 | 3'UTR             | SNP | 37 |
| 6 | DNAH5        | uc003jfd.2 | Splice_Site       | SNP | 37 |
| 6 | DNAI1        | uc003zum.3 | Silent            | SNP | 37 |
| 6 | LYN          | uc003xsk.4 | Missense_Mutation | SNP | 37 |
| 6 | PSG4         | uc002ovj.1 | Missense_Mutation | SNP | 37 |
| 6 | SLC4A1AP     | uc002rlk.4 | Silent            | SNP | 37 |
| 6 | STK16        | uc002vko.2 | Splice_Site       | SNP | 37 |
| 6 | B4GALNT4     | uc001lpb.3 | Missense_Mutation | SNP | 37 |
| 6 | NBEAL2       | uc003cqp.3 | Silent            | SNP | 37 |
| 6 | ADCK3        | uc009xer.1 | 5'UTR             | SNP | 37 |
| 6 | C1orf227     | uc001hjq.3 | Silent            | SNP | 37 |
| 6 | UBXN1        | uc001nuj.3 | Silent            | SNP | 37 |
| 6 | LOC100233156 | uc011mfn.2 | Intron            | SNP | 37 |
| 6 | RABL2B       | uc003bnm.1 | 3'UTR             | SNP | 37 |
| 6 | SNRPN        | uc001zae.3 | Intron            | SNP | 37 |
| 6 | DIP2B        | uc001rww.3 | Splice_Site       | SNP | 37 |
| 6 | ADAMTS12     | uc003jia.1 | Missense_Mutation | SNP | 37 |
| 6 | LAMP5        | uc002wni.2 | 3'UTR             | SNP | 37 |
| 6 | GNB2L1       | uc003mni.1 | Intron            | SNP | 37 |
| 6 | CACNB1       | uc002hrm.2 | Silent            | SNP | 37 |
| 6 | H1FOO        | uc003emu.3 | Silent            | SNP | 37 |
| 6 | EFEMP2       | uc001ofy.4 | Missense_Mutation | SNP | 37 |
| 6 | DNAH11       | uc003svc.3 | Missense_Mutation | SNP | 37 |
| 6 | POLE2        | uc001wwu.3 | Missense_Mutation | SNP | 37 |
| 6 | HPS5         | uc001mod.1 | Missense_Mutation | SNP | 37 |
| 6 | RAB10        | uc002rgv.3 | 5'UTR             | SNP | 37 |
| 6 | GPC5         | uc010tif.2 | Missense_Mutation | SNP | 37 |
| 6 | HIST3H2A     | uc001hsy.3 | Silent            | SNP | 37 |
| 6 | JAKMIP1      | uc010idb.1 | Silent            | SNP | 37 |
| 6 | INTU         | uc003ifk.2 | Missense_Mutation | SNP | 37 |



|   |            |            |                   |     |    |
|---|------------|------------|-------------------|-----|----|
| 6 | DSCAML1    | uc001prh.1 | Silent            | SNP | 37 |
| 6 | ALMS1      | uc002sje.1 | Missense_Mutation | SNP | 37 |
| 6 | BRSK2      | uc009ycv.1 | Silent            | SNP | 37 |
| 6 | TNRC6B     | uc011aor.2 | Silent            | SNP | 37 |
| 6 | PMF1-BGLAP | uc021pbc.1 | Missense_Mutation | SNP | 37 |
| 6 | PLCZ1      | uc021qvx.1 | Missense_Mutation | SNP | 37 |
| 6 | ASCC3      | uc010kcv.3 | 3'UTR             | SNP | 37 |
| 6 | ZNF747     | uc002dyn.3 | Missense_Mutation | SNP | 37 |
| 6 | OR6C3      | uc010spj.2 | Missense_Mutation | SNP | 37 |
| 6 | EGR1       | uc003ldb.1 | Missense_Mutation | SNP | 37 |
| 6 | PCDP1      | uc002tmb.3 | Missense_Mutation | SNP | 37 |
| 6 | SGK196     | uc003xpw.2 | Missense_Mutation | SNP | 37 |
| 6 | KCNB2      | uc003xzb.3 | Missense_Mutation | SNP | 37 |
| 6 | HOXD8      | uc002uko.3 | Silent            | SNP | 37 |
| 6 | PKDREJ     | uc003bhh.3 | Missense_Mutation | SNP | 37 |
| 6 | AR         | uc004dwu.2 | Missense_Mutation | SNP | 37 |
| 6 | GRK4       | uc003ggn.1 | Silent            | SNP | 37 |
| 6 | STK16      | uc002vko.2 | Silent            | SNP | 37 |
| 6 | RBM28      | uc003vmp.2 | Silent            | SNP | 37 |
| 6 | TRIM68     | uc001lzf.2 | Silent            | SNP | 37 |
| 6 | DNAJC13    | uc003eor.3 | Missense_Mutation | SNP | 37 |
| 6 | SHD        | uc002lzw.2 | Missense_Mutation | SNP | 37 |
| 6 | LGALSL     | uc002scy.4 | 3'UTR             | SNP | 37 |
| 6 | CR1        | uc001hfx.3 | Nonsense_Mutation | SNP | 37 |
| 6 | KPRP       | uc001fal.1 | Silent            | SNP | 37 |
| 6 | RASSF9     | uc001taf.1 | Missense_Mutation | SNP | 37 |
| 6 | ZMIZ2      | uc003tlr.3 | Silent            | SNP | 37 |
| 6 | ENOSF1     | uc010dkf.3 | 3'UTR             | SNP | 37 |
| 6 | CARD6      | uc003jmg.3 | Missense_Mutation | SNP | 37 |
| 6 | FAM53B     | uc001lhv.1 | Silent            | SNP | 37 |
| 6 | RFPL4A     | uc010yge.2 | Silent            | SNP | 37 |
| 6 | TTC9       | uc001xmi.2 | Missense_Mutation | SNP | 37 |
| 6 | MAP3K13    | uc010hyf.3 | Missense_Mutation | SNP | 37 |
| 6 | SYMPK      | uc002pdn.3 | Missense_Mutation | SNP | 37 |
| 6 | GP2        | uc002dgv.3 | Missense_Mutation | SNP | 37 |
| 6 | MATN4      | uc002xnn.2 | Missense_Mutation | SNP | 37 |
| 6 | NHSL2      | uc011mqa.2 | Intron            | SNP | 37 |
| 6 | CD86       | uc003eet.3 | Missense_Mutation | SNP | 37 |
| 6 | TMEM173    | uc003lep.3 | Missense_Mutation | SNP | 37 |
| 6 | TNFRSF25   | uc001anh.3 | 3'UTR             | SNP | 37 |
| 6 | DCAF13     | uc003yln.3 | Missense_Mutation | SNP | 37 |
| 6 | LOXHD1     | uc010xcw.1 | Missense_Mutation | SNP | 37 |
| 6 | ANKRD11    | uc002fmx.1 | 5'UTR             | SNP | 37 |

|   |              |            |                       |     |    |
|---|--------------|------------|-----------------------|-----|----|
| 6 | KRBA1        | uc003wfz.3 | Missense_Mutation     | SNP | 37 |
| 6 | GRIK3        | uc001caz.2 | Silent                | SNP | 37 |
| 6 | CTDSPL       | uc003chg.3 | 3'UTR                 | SNP | 37 |
| 6 | PCDHGC5      | uc003ljm.2 | Missense_Mutation     | SNP | 37 |
| 6 | RP1          | uc003xsd.1 | Missense_Mutation     | SNP | 37 |
| 6 | LOC100631378 | uc002ohi.3 | Missense_Mutation     | SNP | 37 |
| 6 | OR5H15       | uc011bgu.2 | Silent                | SNP | 37 |
| 6 | R3HDM2       | uc001snt.2 | Silent                | SNP | 37 |
| 6 | RAP1GAP2     | uc010ckd.3 | Splice_Site           | SNP | 37 |
| 6 | TOB2P1       | uc011dla.1 | Non-coding_Transcript | SNP | 37 |
| 6 | HERC2P3      | uc010tvy.2 | 3'UTR                 | SNP | 37 |
| 6 | FAM75C2      | uc011lti.2 | Missense_Mutation     | SNP | 37 |
| 6 | SLC4A10      | uc002ubx.4 | Splice_Site           | SNP | 37 |
| 6 | OR56A4       | uc010qzv.2 | Silent                | SNP | 37 |
| 6 | DAAM1        | uc001xdz.1 | Nonsense_Mutation     | SNP | 37 |
| 6 | CCDC168      | uc001vpm.3 | Silent                | SNP | 37 |
| 6 | NHS          | uc011mix.2 | Silent                | SNP | 37 |
| 6 | RPS11        | uc002pob.1 | 5'UTR                 | SNP | 37 |
| 6 | MUC5B        | uc001lta.3 | Missense_Mutation     | SNP | 37 |
| 6 | GAPDH        | uc001qop.1 | Missense_Mutation     | SNP | 37 |
| 6 | PLIN1        | uc010upx.1 | Missense_Mutation     | SNP | 37 |
| 6 | CIT          | uc001txj.2 | Silent                | SNP | 37 |
| 6 | HGF          | uc003uhl.3 | Silent                | SNP | 37 |
| 6 | ANK3         | uc001jky.3 | Missense_Mutation     | SNP | 37 |
| 6 | MYH9         | uc003apg.3 | Silent                | SNP | 37 |
| 6 | CADM3        | uc001ftk.2 | Intron                | SNP | 37 |
| 6 | SPEG         | uc010fwg.3 | Intron                | SNP | 37 |
| 6 | TMEM178      | uc002rrt.3 | Nonsense_Mutation     | SNP | 37 |
| 6 | PTOV1        | uc002pqb.4 | 5'UTR                 | SNP | 37 |
| 6 | GUCY2C       | uc001rcd.3 | 5'UTR                 | SNP | 37 |
| 6 | DYNLRB2      | uc002ffo.3 | Intron                | SNP | 37 |
| 6 | KCMF1        | uc002sox.4 | Missense_Mutation     | SNP | 37 |
| 6 | MYO15B       | uc002jon.1 | Splice_Site           | SNP | 37 |
| 6 | FAM169A      | uc003kdm.3 | Missense_Mutation     | SNP | 37 |
| 6 | XKR5         | uc022aqv.1 | Missense_Mutation     | SNP | 37 |
| 6 | BPIFB6       | uc010zuc.2 | Missense_Mutation     | SNP | 37 |
| 6 | TMEM206      | uc010pte.2 | Missense_Mutation     | SNP | 37 |
| 6 | ABP1         | uc003wia.1 | Silent                | SNP | 37 |
| 6 | DNAH9        | uc002gne.3 | Silent                | SNP | 37 |
| 6 | RASAL2       | uc001glq.3 | 3'UTR                 | SNP | 37 |
| 6 | TAS2R60      | uc011ktg.2 | Missense_Mutation     | SNP | 37 |
| 6 | PRRC2B       | uc004can.4 | Missense_Mutation     | SNP | 37 |
| 6 | ESPNL        | uc002vxq.4 | Silent                | SNP | 37 |

|   |          |            |                       |     |    |
|---|----------|------------|-----------------------|-----|----|
| 6 | FAM169A  | uc003kdm.3 | Missense_Mutation     | SNP | 37 |
| 6 | KDELC2   | uc001pkj.2 | 3'UTR                 | SNP | 37 |
| 6 | RMST     | uc001tfa.1 | Intron                | SNP | 37 |
| 6 | LYPD1    | uc002ttm.4 | Missense_Mutation     | SNP | 37 |
| 6 | SYNDIG1  | uc002wtw.1 | Missense_Mutation     | SNP | 37 |
| 6 | OR51V1   | uc010qyz.2 | Silent                | SNP | 37 |
| 6 | FAM108A1 | uc002luf.3 | Silent                | SNP | 37 |
| 6 | FAM179A  | uc010ezl.3 | Missense_Mutation     | SNP | 37 |
| 6 | IP6K3    | uc010jvf.2 | Silent                | SNP | 37 |
| 6 | TOMM22   | uc003awe.3 | 5'UTR                 | SNP | 37 |
| 6 | TJAP1    | uc003ovg.2 | 5'UTR                 | SNP | 37 |
| 6 | RNFT2    | uc009zwn.3 | Missense_Mutation     | SNP | 37 |
| 6 | CELSR1   | uc003bhw.1 | Silent                | SNP | 37 |
| 6 | MYBPC1   | uc010svs.2 | Missense_Mutation     | SNP | 37 |
| 6 | NSUN7    | uc003gvj.4 | Missense_Mutation     | SNP | 37 |
| 6 | TTC23L   | uc003jiu.3 | Silent                | SNP | 37 |
| 6 | NFATC4   | uc010tol.2 | Silent                | SNP | 37 |
| 6 | PTPRB    | uc001swc.4 | Nonsense_Mutation     | SNP | 37 |
| 6 | CCDC88C  | uc001xzi.3 | 5'UTR                 | SNP | 37 |
| 6 | TMEM178  | uc002rrt.3 | Nonsense_Mutation     | SNP | 37 |
| 6 | NAT10    | uc001mvk.3 | Missense_Mutation     | SNP | 37 |
| 6 | ULK4     | uc003ckv.4 | Silent                | SNP | 37 |
| 6 | ANK3     | uc001jky.3 | Missense_Mutation     | SNP | 37 |
| 6 | FOXP2    | uc003vgz.3 | Silent                | SNP | 37 |
| 6 | CACNA2D3 | uc003dhf.3 | Intron                | SNP | 37 |
| 6 | HERC2P3  | uc001yth.4 | 3'UTR                 | SNP | 37 |
| 6 | SNRPB    | uc010gan.3 | 3'UTR                 | SNP | 37 |
| 6 | AK097351 | uc002pnb.1 | Missense_Mutation     | SNP | 37 |
| 6 | OR2T8    | uc010pzc.2 | Missense_Mutation     | SNP | 37 |
| 6 | IMPG2    | uc003duq.2 | Silent                | SNP | 37 |
| 6 | LPAR6    | uc010acu.3 | Silent                | SNP | 37 |
| 6 | POU5F1B  | uc003ysf.3 | Missense_Mutation     | SNP | 37 |
| 6 | HEATR6   | uc002iyk.1 | Missense_Mutation     | SNP | 37 |
| 6 | TOX2     | uc010ggo.3 | 3'UTR                 | SNP | 37 |
| 6 | MADCAM1  | uc002los.3 | Silent                | SNP | 37 |
| 6 | ABCB1    | uc003uiz.2 | Missense_Mutation     | SNP | 37 |
| 6 | ETF1     | uc003ldc.4 | 3'UTR                 | SNP | 37 |
| 6 | AKD1     | uc003ptn.2 | Missense_Mutation     | SNP | 37 |
| 6 | PLA2G4C  | uc010xzd.2 | Silent                | SNP | 37 |
| 6 | APOB     | uc002red.3 | Silent                | SNP | 37 |
| 6 | BC063132 | uc011mgv.2 | Non-coding_Transcript | SNP | 37 |
| 6 | FAT4     | uc003ifj.4 | Missense_Mutation     | SNP | 37 |
| 6 | SPERT    | uc001van.1 | Silent                | SNP | 37 |

|   |          |            |                   |     |    |
|---|----------|------------|-------------------|-----|----|
| 6 | RBM15B   | uc003dbd.3 | Missense_Mutation | SNP | 37 |
| 6 | GAPDH    | uc001qop.1 | Silent            | SNP | 37 |
| 6 | DOCK5    | uc003xeg.3 | Missense_Mutation | SNP | 37 |
| 6 | DAB1     | uc001cyq.1 | Missense_Mutation | SNP | 37 |
| 6 | WSCD2    | uc001tms.3 | Silent            | SNP | 37 |
| 6 | ZNF678   | uc021pjy.1 | Silent            | SNP | 37 |
| 6 | SYNPO2   | uc010inb.3 | Missense_Mutation | SNP | 37 |
| 6 | ERN1     | uc002jdz.2 | Missense_Mutation | SNP | 37 |
| 6 | DNAJC16  | uc001aws.3 | Missense_Mutation | SNP | 37 |
| 6 | NANOS3   | uc002mxj.4 | Missense_Mutation | SNP | 37 |
| 6 | TGFB3    | uc001xsc.2 | Silent            | SNP | 37 |
| 6 | XKR6     | uc003wtk.1 | Intron            | SNP | 37 |
| 6 | SYNDIG1L | uc001xpx.2 | Missense_Mutation | SNP | 37 |
| 6 | ZNF19    | uc010cgc.1 | Silent            | SNP | 37 |
| 6 | EGFLAM   | uc003jlc.2 | 5'UTR             | SNP | 37 |
| 6 | FAM5B    | uc001glf.3 | Silent            | SNP | 37 |
| 6 | RHBG     | uc009wrz.3 | 5'UTR             | SNP | 37 |
| 6 | OR2A14   | uc011kua.2 | Silent            | SNP | 37 |
| 6 | TRIM35   | uc003xfl.1 | 3'UTR             | SNP | 37 |
| 6 | CACNA1G  | uc002irk.1 | Missense_Mutation | SNP | 37 |
| 6 | UCP2     | uc001oup.1 | 5'UTR             | SNP | 37 |
| 6 | COL4A3BP | uc003kdt.3 | Missense_Mutation | SNP | 37 |
| 6 | OR2A1    | uc011kud.2 | Silent            | SNP | 37 |
| 6 | GPIHBP1  | uc003yxu.2 | Missense_Mutation | SNP | 37 |
| 6 | FRMPD1   | uc011lqn.2 | 3'UTR             | SNP | 37 |
| 6 | LIMS1    | uc002tek.4 | Silent            | SNP | 37 |
| 6 | FCRL3    | uc001fra.3 | 5'UTR             | SNP | 37 |
| 6 | UNCX     | uc011jvw.2 | Missense_Mutation | SNP | 37 |
| 6 | SHANK1   | uc002psx.1 | Missense_Mutation | SNP | 37 |
| 6 | ZNF165   | uc021yro.1 | Silent            | SNP | 37 |
| 6 | ABCA7    | uc002lqw.4 | Silent            | SNP | 37 |
| 6 | TUBE1    | uc003pvq.3 | Missense_Mutation | SNP | 37 |
| 6 | RCBTB1   | uc001vde.1 | Missense_Mutation | SNP | 37 |
| 6 | ATP1A4   | uc001fve.4 | Missense_Mutation | SNP | 37 |
| 6 | AMIGO2   | uc001rpm.3 | Missense_Mutation | SNP | 37 |
| 6 | DIDO1    | uc002ydr.2 | Missense_Mutation | SNP | 37 |
| 6 | COL4A1   | uc001vqw.4 | Missense_Mutation | SNP | 37 |
| 6 | CTSA     | uc002xqh.3 | 3'UTR             | SNP | 37 |
| 6 | MAGEC3   | uc011mwp.2 | Missense_Mutation | SNP | 37 |
| 6 | OR56A5   | uc010qzu.2 | Missense_Mutation | SNP | 37 |
| 6 | MEX3D    | uc021uml.1 | Silent            | SNP | 37 |
| 6 | LTBP2    | uc001xqa.3 | Missense_Mutation | SNP | 37 |
| 6 | HGD      | uc003edv.3 | 5'UTR             | SNP | 37 |

|   |             |            |                       |     |    |
|---|-------------|------------|-----------------------|-----|----|
| 6 | ABCA13      | uc003tos.1 | Missense_Mutation     | SNP | 37 |
| 6 | ODZ3        | uc003ivd.1 | Missense_Mutation     | SNP | 37 |
| 6 | ALG5        | uc001uvy.3 | Silent                | SNP | 37 |
| 6 | CSMD1       | uc003wqe.3 | 3'UTR                 | SNP | 37 |
| 6 | ZNF404      | uc002oxs.4 | Missense_Mutation     | SNP | 37 |
| 6 | SLC2A14     | uc001qtk.3 | 5'UTR                 | SNP | 37 |
| 6 | RBBP4       | uc001bvr.3 | 3'UTR                 | SNP | 37 |
| 6 | C14orf23    | uc001wqf.3 | Intron                | SNP | 37 |
| 6 | IQCJ-SCHIP1 | uc003fcu.2 | 5'UTR                 | SNP | 37 |
| 6 | CYP2C9      | uc001kka.4 | Missense_Mutation     | SNP | 37 |
| 6 | SAMHD1      | uc002xgh.2 | Missense_Mutation     | SNP | 37 |
| 6 | PREX2       | uc003xxu.1 | Missense_Mutation     | SNP | 37 |
| 6 | BC080605    | uc004aex.3 | Non-coding_Transcript | SNP | 37 |
| 6 | SPRR2B      | uc001fbg.3 | Missense_Mutation     | SNP | 37 |
| 6 | ZNF565      | uc002odp.1 | 3'UTR                 | SNP | 37 |
| 6 | DLGAP2      | uc003wpl.3 | Silent                | SNP | 37 |
| 6 | AK296966    | uc011bgq.1 | Nonsense_Mutation     | SNP | 37 |
| 6 | DNAH5       | uc003jfd.2 | Silent                | SNP | 37 |
| 6 | FMN2        | uc010pye.2 | Missense_Mutation     | SNP | 37 |
| 6 | NT5E        | uc003pko.4 | Missense_Mutation     | SNP | 37 |
| 6 | ZNF746      | uc010lpi.2 | Missense_Mutation     | SNP | 37 |
| 6 | ZNF300P1    | uc003lsz.1 | 3'UTR                 | SNP | 37 |
| 6 | MYO18B      | uc003abz.1 | Missense_Mutation     | SNP | 37 |
| 6 | FBXO41      | uc021vjh.1 | Silent                | SNP | 37 |
| 6 | ZC3HAV1     | uc003vun.3 | Missense_Mutation     | SNP | 37 |
| 6 | ATP10D      | uc003gzk.1 | Silent                | SNP | 37 |
| 6 | ERVMER61-1  | uc001gsd.3 | 5'UTR                 | SNP | 37 |
| 6 | IQCD        | uc001tuu.3 | Intron                | SNP | 37 |
| 6 | PCDHAC2     | uc003lhf.2 | Missense_Mutation     | SNP | 37 |
| 6 | LOC400027   | uc001roq.3 | Silent                | SNP | 37 |
| 6 | CABIN1      | uc002zzi.1 | Missense_Mutation     | SNP | 37 |
| 6 | LIX1        | uc003kmy.4 | Missense_Mutation     | SNP | 37 |
| 6 | ZSCAN4      | uc002qpu.3 | Missense_Mutation     | SNP | 37 |
| 6 | SLC22A10    | uc009yor.3 | Silent                | SNP | 37 |
| 6 | TEX13A      | uc004emb.3 | Missense_Mutation     | SNP | 37 |
| 6 | HCFC2       | uc001tkj.4 | Missense_Mutation     | SNP | 37 |
| 6 | OR4A47      | uc010rhx.2 | Silent                | SNP | 37 |
| 6 | SYT9        | uc001mfe.3 | Missense_Mutation     | SNP | 37 |
| 6 | IRF2        | uc003iwf.4 | Missense_Mutation     | SNP | 37 |
| 6 | OR2M7       | uc010pzk.2 | Missense_Mutation     | SNP | 37 |
| 6 | RXFP4       | uc010pgs.2 | Missense_Mutation     | SNP | 37 |
| 6 | RPE         | uc002vdn.3 | Silent                | SNP | 37 |
| 6 | RELN        | uc022ajr.1 | Nonsense_Mutation     | SNP | 37 |

|   |           |            |                   |     |    |
|---|-----------|------------|-------------------|-----|----|
| 6 | ABCA13    | uc003toq.2 | Silent            | SNP | 37 |
| 6 | C3        | uc002mfm.3 | Missense_Mutation | SNP | 37 |
| 6 | ZNF568    | uc010efg.3 | Missense_Mutation | SNP | 37 |
| 6 | RINL      | uc010xuo.2 | Missense_Mutation | SNP | 37 |
| 6 | CELF6     | uc002au.2  | Missense_Mutation | SNP | 37 |
| 6 | FPR1      | uc021uyn.1 | Silent            | SNP | 37 |
| 6 | CASKIN1   | uc010bsg.1 | Silent            | SNP | 37 |
| 6 | ZNF331    | uc002qbx.1 | Missense_Mutation | SNP | 37 |
| 6 | CD4       | uc001qqv.2 | Silent            | SNP | 37 |
| 6 | CLU       | uc003xfy.2 | Missense_Mutation | SNP | 37 |
| 6 | IL22RA1   | uc010oeh.2 | Splice_Site       | SNP | 37 |
| 6 | PHEX      | uc004dah.3 | Missense_Mutation | SNP | 37 |
| 6 | VEPH1     | uc003fbj.2 | Missense_Mutation | SNP | 37 |
| 6 | RIPPLY2   | uc003pke.3 | 5'UTR             | SNP | 37 |
| 6 | DNAH5     | uc003jfd.2 | Missense_Mutation | SNP | 37 |
| 6 | KRT75     | uc001saj.2 | Silent            | SNP | 37 |
| 6 | TMOD3     | uc002abn.3 | Missense_Mutation | SNP | 37 |
| 6 | SCN11A    | uc021wvy.1 | Missense_Mutation | SNP | 37 |
| 6 | MPP3      | uc002ieh.3 | Missense_Mutation | SNP | 37 |
| 6 | UCHL5     | uc001gsm.3 | Nonsense_Mutation | SNP | 37 |
| 6 | CBS       | uc002zcu.2 | Silent            | SNP | 37 |
| 6 | MRE11A    | uc009ywj.2 | Silent            | SNP | 37 |
| 6 | PRDM2     | uc001avi.3 | Missense_Mutation | SNP | 37 |
| 6 | LRFN3     | uc002oco.3 | Missense_Mutation | SNP | 37 |
| 6 | CACNA1I   | uc003ayc.3 | Missense_Mutation | SNP | 37 |
| 6 | LOC401010 | uc002tst.2 | Silent            | SNP | 37 |
| 6 | C11orf24  | uc001onr.4 | Nonsense_Mutation | SNP | 37 |
| 6 | MACF1     | uc021olw.1 | Missense_Mutation | SNP | 37 |
| 6 | KIAA0825  | uc011cuk.2 | Nonsense_Mutation | SNP | 37 |
| 6 | ADAMTS12  | uc003jia.1 | Missense_Mutation | SNP | 37 |
| 6 | DGKI      | uc003vtt.3 | Missense_Mutation | SNP | 37 |
| 6 | GPR83     | uc001pet.2 | 3'UTR             | SNP | 37 |
| 6 | SMCR7L    | uc003axw.3 | Missense_Mutation | SNP | 37 |
| 6 | UPB1      | uc003aaf.3 | Missense_Mutation | SNP | 37 |
| 6 | TIA1      | uc002sgj.4 | Silent            | SNP | 37 |
| 6 | KBTBD5    | uc003clv.1 | Missense_Mutation | SNP | 37 |
| 6 | TYRO3     | uc001zof.2 | 3'UTR             | SNP | 37 |
| 6 | C3orf77   | uc003cna.4 | Missense_Mutation | SNP | 37 |
| 6 | DOPEY2    | uc002yvg.3 | Missense_Mutation | SNP | 37 |
| 6 | C10orf129 | uc001kke.3 | Intron            | SNP | 37 |
| 6 | CDKN1A    | uc011dtq.2 | Nonsense_Mutation | SNP | 37 |
| 6 | B3GNT5    | uc003flk.3 | Silent            | SNP | 37 |
| 6 | RSPH6A    | uc002pdm.3 | Missense_Mutation | SNP | 37 |

|   |           |            |                   |     |    |
|---|-----------|------------|-------------------|-----|----|
| 6 | ZDHHC5    | uc001nkx.1 | Silent            | SNP | 37 |
| 6 | PAX8      | uc010yxt.2 | Missense_Mutation | SNP | 37 |
| 6 | MGA       | uc010ucy.2 | Nonsense_Mutation | SNP | 37 |
| 6 | TSPAN32   | uc001lvy.1 | Missense_Mutation | SNP | 37 |
| 6 | MLL       | uc001ptb.3 | Missense_Mutation | SNP | 37 |
| 6 | AIM1      | uc003prh.3 | 5'UTR             | SNP | 37 |
| 6 | RXFP2     | uc001utt.3 | Silent            | SNP | 37 |
| 6 | PLIN4     | uc002mar.1 | Missense_Mutation | SNP | 37 |
| 6 | LOC554223 | uc010jrm.1 | Missense_Mutation | SNP | 37 |
| 6 | abParts   | uc010yts.2 | Intron            | SNP | 37 |
| 6 | PCDHB18   | uc003ljc.1 | Missense_Mutation | SNP | 37 |
| 6 | SEPP1     | uc011cps.2 | Intron            | SNP | 37 |
| 6 | CHIT1     | uc001gzn.2 | Missense_Mutation | SNP | 37 |
| 6 | C12orf50  | uc001tam.1 | Missense_Mutation | SNP | 37 |
| 6 | CNTN5     | uc001pga.3 | 3'UTR             | SNP | 37 |
| 6 | CACNA2D2  | uc003daq.3 | Splice_Site       | SNP | 37 |
| 6 | TTN       | uc021vsy.1 | Silent            | SNP | 37 |
| 6 | HSPG2     | uc009vqd.3 | Silent            | SNP | 37 |
| 6 | FPR1      | uc021uyn.1 | 3'UTR             | SNP | 37 |
| 6 | SSH3      | uc001okj.3 | Missense_Mutation | SNP | 37 |
| 6 | TCHH      | uc001ezp.2 | Missense_Mutation | SNP | 37 |
| 6 | HVCN1     | uc001trs.1 | Missense_Mutation | SNP | 37 |
| 6 | GIMAP8    | uc003whj.3 | Silent            | SNP | 37 |
| 6 | LAMC1     | uc001gpy.4 | Missense_Mutation | SNP | 37 |
| 6 | CHRNA7    | uc021sic.1 | Silent            | SNP | 37 |
| 6 | MYO3B     | uc002ufy.3 | Splice_Site       | SNP | 37 |
| 6 | CACNA1G   | uc002irk.1 | Missense_Mutation | SNP | 37 |
| 6 | DNAJC10   | uc002uow.1 | Missense_Mutation | SNP | 37 |
| 6 | LOC93432  | uc003vwz.3 | Splice_Site       | SNP | 37 |
| 6 | TBC1D8B   | uc004emo.3 | Missense_Mutation | SNP | 37 |
| 6 | XCR1      | uc003cpe.3 | Missense_Mutation | SNP | 37 |
| 6 | TMPRSS6   | uc003aqt.1 | 3'UTR             | SNP | 37 |
| 6 | CXXC4     | uc003hxg.3 | Missense_Mutation | SNP | 37 |
| 6 | PCDHB15   | uc003lje.3 | Missense_Mutation | SNP | 37 |
| 6 | GIT1      | uc002heg.2 | Missense_Mutation | SNP | 37 |
| 6 | BC014150  | uc002yoy.3 | Missense_Mutation | SNP | 37 |
| 6 | THSD4     | uc002atb.1 | Silent            | SNP | 37 |
| 6 | DNAH14    | uc001how.2 | Missense_Mutation | SNP | 37 |
| 6 | HTR2C     | uc004epu.1 | Silent            | SNP | 37 |
| 6 | GDAP1L1   | uc010zwl.2 | 3'UTR             | SNP | 37 |
| 6 | CDH9      | uc003jgs.1 | Missense_Mutation | SNP | 37 |
| 6 | UBAP2L    | uc001fep.4 | Missense_Mutation | SNP | 37 |
| 6 | ARHGEF5   | uc003wel.3 | Missense_Mutation | SNP | 37 |

|   |          |            |                       |     |    |
|---|----------|------------|-----------------------|-----|----|
| 6 | IGHE     | uc001yrw.1 | Intron                | SNP | 37 |
| 6 | MRPL39   | uc002yln.3 | Silent                | SNP | 37 |
| 6 | RAPGEF4  | uc002uhv.4 | Missense_Mutation     | SNP | 37 |
| 6 | NLRP2    | uc021vbq.1 | 3'UTR                 | SNP | 37 |
| 6 | C19orf77 | uc010xhk.1 | Nonsense_Mutation     | SNP | 37 |
| 6 | SVOP     | uc010sxh.1 | Silent                | SNP | 37 |
| 6 | TPM1     | uc002alm.3 | Silent                | SNP | 37 |
| 6 | SLCO4A1  | uc002ydb.1 | 3'UTR                 | SNP | 37 |
| 6 | C19orf33 | uc002ohu.1 | Silent                | SNP | 37 |
| 6 | HTR7     | uc001kha.3 | Silent                | SNP | 37 |
| 6 | TNRC18   | uc003soi.4 | Silent                | SNP | 37 |
| 6 | COL10A1  | uc003pwm.3 | Silent                | SNP | 37 |
| 6 | PCDHAC2  | uc003lhq.2 | Nonsense_Mutation     | SNP | 37 |
| 6 | CDC42EP4 | uc002jjn.3 | 5'UTR                 | SNP | 37 |
| 6 | CELSR1   | uc003bhw.1 | Missense_Mutation     | SNP | 37 |
| 6 | GPSM1    | uc004chd.2 | Missense_Mutation     | SNP | 37 |
| 6 | JAK3     | uc002nhn.4 | Silent                | SNP | 37 |
| 6 | NFE2L2   | uc002ulh.4 | 3'UTR                 | SNP | 37 |
| 6 | SSPO     | uc010lpk.3 | Missense_Mutation     | SNP | 37 |
| 6 | C1orf129 | uc010plz.2 | Missense_Mutation     | SNP | 37 |
| 6 | DLX3     | uc002ipy.3 | Missense_Mutation     | SNP | 37 |
| 6 | SYT4     | uc002law.3 | Missense_Mutation     | SNP | 37 |
| 6 | PDE4DIP  | uc021ouh.1 | Silent                | SNP | 37 |
| 6 | ASGR2    | uc002gep.3 | Missense_Mutation     | SNP | 37 |
| 6 | TNRC6A   | uc002dmm.3 | Missense_Mutation     | SNP | 37 |
| 6 | SAMD9    | uc003umf.3 | Missense_Mutation     | SNP | 37 |
| 6 | IMPACT   | uc002kvh.4 | Missense_Mutation     | SNP | 37 |
| 6 | SLC6A3   | uc003jck.3 | Silent                | SNP | 37 |
| 6 | ASXL3    | uc010dmg.1 | Missense_Mutation     | SNP | 37 |
| 6 | ZNF786   | uc003wfh.2 | Silent                | SNP | 37 |
| 6 | PCDHAC2  | uc003lih.2 | Silent                | SNP | 37 |
| 6 | LILRP2   | uc002qgs.1 | Non-coding_Transcript | SNP | 37 |
| 6 | ATP1B3   | uc003eug.1 | Missense_Mutation     | SNP | 37 |
| 6 | RDH16    | uc001smi.4 | Splice_Site           | SNP | 37 |
| 6 | FABP1    | uc002sst.2 | Intron                | SNP | 37 |
| 6 | PAEP     | uc010naw.1 | 3'UTR                 | SNP | 37 |
| 6 | MEX3D    | uc021uml.1 | Missense_Mutation     | SNP | 37 |
| 6 | LPA      | uc003qtl.3 | Missense_Mutation     | SNP | 37 |
| 6 | TNFRSF18 | uc001add.3 | Missense_Mutation     | SNP | 37 |
| 6 | HELZ     | uc010wqk.2 | Missense_Mutation     | SNP | 37 |
| 6 | LANCL2   | uc003tqp.3 | Silent                | SNP | 37 |
| 6 | SYCP2L   | uc003mzo.3 | 5'UTR                 | SNP | 37 |
| 6 | PARP4    | uc001upl.3 | Missense_Mutation     | SNP | 37 |



|   |             |            |                   |     |    |
|---|-------------|------------|-------------------|-----|----|
| 6 | RBP1        | uc003eti.2 | Silent            | SNP | 37 |
| 6 | CAPN13      | uc021vfn.1 | Missense_Mutation | SNP | 37 |
| 6 | SLC19A1     | uc002zhl.2 | Silent            | SNP | 37 |
| 6 | WEE2        | uc003vwn.2 | Missense_Mutation | SNP | 37 |
| 6 | Unknown     |            | IGR               | SNP | 37 |
| 6 | ITGB4       | uc002jpg.3 | Silent            | SNP | 37 |
| 6 | TLE2        | uc010dth.3 | 3'UTR             | SNP | 37 |
| 6 | DNAH14      | uc001how.2 | Missense_Mutation | SNP | 37 |
| 6 | RADIL       | uc003snj.1 | Missense_Mutation | SNP | 37 |
| 6 | MYO5B       | uc002leb.2 | Silent            | SNP | 37 |
| 6 | PCDHGC5     | uc003ljo.2 | Silent            | SNP | 37 |
| 6 | DNAH8       | uc021yzh.1 | Silent            | SNP | 37 |
| 6 | WDR87       | uc002ohj.2 | Silent            | SNP | 37 |
| 6 | ATP5D       | uc002lrn.3 | 5'UTR             | SNP | 37 |
| 6 | PMPCA       | uc004chm.1 | Silent            | SNP | 37 |
| 6 | NIPAL2      | uc003yim.1 | 3'UTR             | SNP | 37 |
| 6 | PPAN-P2RY11 | uc002mna.3 | Silent            | SNP | 37 |
| 6 | SHROOM2     | uc004csu.1 | 3'UTR             | SNP | 37 |
| 6 | SYNDIG1L    | uc001xpx.2 | Silent            | SNP | 37 |
| 6 | RFWD2       | uc001gku.1 | Silent            | SNP | 37 |
| 6 | GRHL1       | uc002raa.3 | Silent            | SNP | 37 |
| 6 | OR8B4       | uc010sak.2 | Silent            | SNP | 37 |
| 6 | LRP1B       | uc002tvj.1 | Missense_Mutation | SNP | 37 |
| 6 | CBFA2T2     | uc002wzg.1 | Missense_Mutation | SNP | 37 |
| 6 | GPR77       | uc010ela.1 | Silent            | SNP | 37 |
| 6 | PLXNA1      | uc003ejg.3 | Missense_Mutation | SNP | 37 |
| 6 | AEN         | uc002bmt.2 | Silent            | SNP | 37 |
| 6 | COL8A1      | uc003dti.1 | Missense_Mutation | SNP | 37 |
| 6 | CHI3L2      | uc001eam.3 | Missense_Mutation | SNP | 37 |
| 6 | ZCCHC14     | uc002fjz.1 | Missense_Mutation | SNP | 37 |
| 6 | DTX2        | uc003ufn.4 | 5'UTR             | SNP | 37 |
| 6 | ZFAT        | uc003yup.3 | Missense_Mutation | SNP | 37 |
| 6 | ZSWIM4      | uc002mxh.1 | Missense_Mutation | SNP | 37 |
| 6 | MYLK        | uc003ego.3 | Missense_Mutation | SNP | 37 |
| 6 | CCDC129     | uc011kae.2 | Silent            | SNP | 37 |
| 6 | SAMD9L      | uc003umh.1 | Silent            | SNP | 37 |
| 6 | FZD8        | uc001iyz.1 | Missense_Mutation | SNP | 37 |
| 6 | GM2A        | uc011dcr.2 | Missense_Mutation | SNP | 37 |
| 6 | CD4         | uc001qqv.2 | Missense_Mutation | SNP | 37 |
| 6 | USP29       | uc002qny.3 | Missense_Mutation | SNP | 37 |
| 6 | KIAA0196    | uc003yrt.3 | Missense_Mutation | SNP | 37 |
| 6 | PCDHGC5     | uc003lkt.2 | Missense_Mutation | SNP | 37 |
| 6 | MYH7        | uc001wjx.3 | Missense_Mutation | SNP | 37 |

|   |           |            |                   |     |    |
|---|-----------|------------|-------------------|-----|----|
| 6 | PDXDC2P   | uc010vlq.1 | Missense_Mutation | SNP | 37 |
| 6 | GNAS      | uc021wfo.1 | Splice_Site       | SNP | 37 |
| 6 | KCNQ1     | uc001lwn.3 | Silent            | SNP | 37 |
| 6 | IDH1      | uc002vcs.3 | Missense_Mutation | SNP | 37 |
| 6 | MTUS2     | uc001usl.4 | Silent            | SNP | 37 |
| 6 | LOC729020 | uc009xxi.2 | Silent            | SNP | 37 |
| 6 | GFPT2     | uc003mlw.1 | Missense_Mutation | SNP | 37 |
| 6 | NIPAL4    | uc003lwx.4 | Silent            | SNP | 37 |
| 6 | PGC       | uc003ora.2 | Missense_Mutation | SNP | 37 |
| 6 | HYDIN     | uc002ezr.3 | Missense_Mutation | SNP | 37 |
| 6 | PTPRQ     | uc001sze.2 | Missense_Mutation | SNP | 37 |
| 6 | DTX2      | uc003ufn.4 | 5'UTR             | SNP | 37 |
| 6 | GPR183    | uc001vog.3 | Missense_Mutation | SNP | 37 |
| 6 | INSR      | uc002mgd.1 | Silent            | SNP | 37 |
| 6 | CHGB      | uc002wmg.3 | Silent            | SNP | 37 |
| 6 | C17orf57  | uc002iln.3 | Intron            | SNP | 37 |
| 6 | ZHX1      | uc003yqe.3 | Silent            | SNP | 37 |
| 6 | AFM       | uc003hhb.3 | Silent            | SNP | 37 |
| 6 | DCUN1D4   | uc011bzo.2 | Missense_Mutation | SNP | 37 |
| 6 | EMR1      | uc002mfw.3 | Missense_Mutation | SNP | 37 |
| 6 | ZNF585B   | uc002ofq.3 | Silent            | SNP | 37 |
| 6 | DSCAM     | uc002yyq.1 | Missense_Mutation | SNP | 37 |
| 6 | TCF7      | uc003kyz.3 | Missense_Mutation | SNP | 37 |
| 6 | NRAP      | uc001lal.3 | Silent            | SNP | 37 |
| 6 | ABCA3     | uc002cpy.1 | Silent            | SNP | 37 |
| 6 | CSMD3     | uc003ynu.3 | Silent            | SNP | 37 |
| 6 | MUC16     | uc002mkp.3 | Missense_Mutation | SNP | 37 |
| 6 | NXP2      | uc002tvi.3 | Missense_Mutation | SNP | 37 |
| 6 | USP9Y     | uc004fst.1 | Missense_Mutation | SNP | 37 |
| 7 | FBXO34    | uc001xbu.3 | Frame_Shift_Del   | DEL | 37 |
| 7 | CTSO      | uc003ipg.3 | 3'UTR             | SNP | 37 |
| 7 | LSM2      | uc003nxg.3 | Missense_Mutation | SNP | 37 |
| 7 | APOB      | uc002red.3 | Silent            | SNP | 37 |
| 7 | BRPF1     | uc003bsf.3 | Missense_Mutation | SNP | 37 |
| 7 | VAMP7     | uc004fns.3 | Missense_Mutation | SNP | 37 |
| 7 | UNC93A    | uc003qvq.3 | Silent            | SNP | 37 |
| 7 | ZNF610    | uc002pyx.4 | 3'UTR             | SNP | 37 |
| 7 | LZTS2     | uc001ksj.3 | Missense_Mutation | SNP | 37 |
| 7 | CELSR1    | uc003bhw.1 | Missense_Mutation | SNP | 37 |
| 7 | TET3      | uc002skb.4 | Silent            | SNP | 37 |
| 7 | UGT3A2    | uc003jjz.2 | Silent            | SNP | 37 |
| 7 | SLC26A10  | uc001spe.3 | Silent            | SNP | 37 |
| 7 | KIAA0195  | uc010wsa.2 | Missense_Mutation | SNP | 37 |

|   |              |            |                       |     |    |
|---|--------------|------------|-----------------------|-----|----|
| 7 | IGSF1        | uc004ewe.4 | Missense_Mutation     | SNP | 37 |
| 7 | SALL4        | uc002xwh.4 | Silent                | SNP | 37 |
| 7 | LRRC4C       | uc001mxa.1 | Missense_Mutation     | SNP | 37 |
| 7 | HRNR         | uc001ezt.1 | Missense_Mutation     | SNP | 37 |
| 7 | UROC1        | uc010hsi.2 | Silent                | SNP | 37 |
| 7 | MAN2A1       | uc003kou.1 | Missense_Mutation     | SNP | 37 |
| 7 | SLC9A8       | uc002xuv.1 | Silent                | SNP | 37 |
| 7 | CDC14C       | uc010kyv.1 | Silent                | SNP | 37 |
| 7 | SLC38A4      | uc001rpi.2 | Missense_Mutation     | SNP | 37 |
| 7 | CADM3        | uc001ftk.2 | Missense_Mutation     | SNP | 37 |
| 7 | EPB49        | uc022asw.1 | Missense_Mutation     | SNP | 37 |
| 7 | CHAT         | uc001jhz.2 | Nonsense_Mutation     | SNP | 37 |
| 7 | ITIH4        | uc011bem.2 | Silent                | SNP | 37 |
| 7 | ZNF727       | uc011kdm.2 | Missense_Mutation     | SNP | 37 |
| 7 | HEATR3       | uc002efw.3 | Missense_Mutation     | SNP | 37 |
| 7 | LRRC39       | uc001dsy.1 | Missense_Mutation     | SNP | 37 |
| 7 | PLCZ1        | uc021qvx.1 | Missense_Mutation     | SNP | 37 |
| 7 | C15orf39     | uc002azp.4 | Silent                | SNP | 37 |
| 7 | SLC39A5      | uc010sqj.2 | Missense_Mutation     | SNP | 37 |
| 7 | KIAA1468     | uc002lil.3 | Silent                | SNP | 37 |
| 7 | LRRC7        | uc001dep.3 | Missense_Mutation     | SNP | 37 |
| 7 | RBM12B       | uc003yfv.3 | Silent                | SNP | 37 |
| 7 | C7           | uc003jmh.3 | Missense_Mutation     | SNP | 37 |
| 7 | NRSN2        | uc002wdi.4 | Missense_Mutation     | SNP | 37 |
| 7 | DENND5A      | uc001mhl.3 | Silent                | SNP | 37 |
| 7 | TRAPPC8      | uc002kxc.4 | 3'UTR                 | SNP | 37 |
| 7 | GRPEL2       | uc003lqj.3 | 3'UTR                 | SNP | 37 |
| 7 | TTN          | uc010zfk.1 | Missense_Mutation     | SNP | 37 |
| 7 | LOC100130331 | uc010pyc.2 | Non-coding_Transcript | SNP | 37 |
| 7 | GABRA1       | uc010jiw.3 | Silent                | SNP | 37 |
| 7 | NLRP10       | uc001mfv.1 | Missense_Mutation     | SNP | 37 |
| 7 | NCOA6        | uc002xav.3 | Missense_Mutation     | SNP | 37 |
| 7 | PHF16        | uc004dgv.3 | Nonsense_Mutation     | SNP | 37 |
| 7 | HAPLN4       | uc002nmb.3 | Missense_Mutation     | SNP | 37 |
| 7 | WDR17        | uc003iuj.3 | Missense_Mutation     | SNP | 37 |
| 7 | HRC          | uc002pmv.3 | Missense_Mutation     | SNP | 37 |
| 7 | SLC39A7      | uc003odf.3 | Missense_Mutation     | SNP | 37 |
| 7 | C19orf21     | uc002lpo.3 | Missense_Mutation     | SNP | 37 |
| 7 | FAM159A      | uc001cuf.3 | Silent                | SNP | 37 |
| 7 | CT45A5       | uc004eze.3 | Missense_Mutation     | SNP | 37 |
| 7 | CLEC4G       | uc002mhp.4 | Missense_Mutation     | SNP | 37 |
| 7 | SPTA1        | uc001fst.1 | Missense_Mutation     | SNP | 37 |
| 7 | BBS9         | uc003tdn.1 | Nonsense_Mutation     | SNP | 37 |

|   |          |            |                   |     |    |
|---|----------|------------|-------------------|-----|----|
| 7 | CCDC148  | uc002tzq.3 | Missense_Mutation | SNP | 37 |
| 7 | FLJ43860 | uc003ywi.2 | Silent            | SNP | 37 |
| 7 | DDX20    | uc001ebs.3 | Silent            | SNP | 37 |
| 7 | DOCK11   | uc004eqp.2 | Silent            | SNP | 37 |
| 7 | NDST4    | uc003ibu.3 | Missense_Mutation | SNP | 37 |
| 7 | TMEM74   | uc003ymy.1 | Missense_Mutation | SNP | 37 |
| 7 | FRMPD1   | uc004aag.1 | Missense_Mutation | SNP | 37 |
| 7 | LY9      | uc001fwu.3 | Missense_Mutation | SNP | 37 |
| 7 | SYNPO2   | uc010inb.3 | Silent            | SNP | 37 |
| 7 | PARP1    | uc001hqd.4 | Missense_Mutation | SNP | 37 |
| 7 | TMEM200A | uc003qca.3 | Silent            | SNP | 37 |
| 7 | TMEM206  | uc010pte.2 | Silent            | SNP | 37 |
| 7 | PER3     | uc001aop.3 | Missense_Mutation | SNP | 37 |
| 7 | PRKCB    | uc002dme.3 | Missense_Mutation | SNP | 37 |
| 7 | HCN1     | uc003jok.3 | Missense_Mutation | SNP | 37 |
| 7 | LY6E     | uc003yxn.2 | Silent            | SNP | 37 |
| 7 | OR2T3    | uc001iel.1 | Missense_Mutation | SNP | 37 |
| 7 | MEGF6    | uc001akl.3 | Silent            | SNP | 37 |
| 7 | GRIA2    | uc003ipm.4 | Missense_Mutation | SNP | 37 |
| 7 | ANKRD10  | uc001vrn.3 | Silent            | SNP | 37 |
| 7 | RPL7L1   | uc003osq.1 | Silent            | SNP | 37 |
| 7 | LYVE1    | uc001miv.2 | Missense_Mutation | SNP | 37 |
| 7 | PNMA3    | uc004fhc.2 | Silent            | SNP | 37 |
| 7 | SNIP1    | uc001cbi.3 | Silent            | SNP | 37 |
| 7 | KPNA6    | uc010ogy.2 | Silent            | SNP | 37 |
| 7 | BEST3    | uc001svg.3 | Missense_Mutation | SNP | 37 |
| 7 | APBA1    | uc004ahh.2 | Silent            | SNP | 37 |
| 7 | TIMD4    | uc003lwh.2 | Missense_Mutation | SNP | 37 |
| 7 | NRAS     | uc009wgu.3 | Missense_Mutation | SNP | 37 |
| 7 | ASIC2    | uc002hht.3 | Missense_Mutation | SNP | 37 |
| 7 | PPAPDC1A | uc001lev.1 | Splice_Site       | SNP | 37 |
| 7 | CDHR2    | uc021yie.1 | Missense_Mutation | SNP | 37 |
| 7 | DAAM1    | uc001xdz.1 | Missense_Mutation | SNP | 37 |
| 7 | SSTR2    | uc002jje.3 | 5'UTR             | SNP | 37 |
| 7 | ZNF573   | uc002ohe.3 | Missense_Mutation | SNP | 37 |
| 7 | FAAH2    | uc004dvc.3 | Missense_Mutation | SNP | 37 |
| 7 | SERPING1 | uc010rvj.1 | Missense_Mutation | SNP | 37 |
| 7 | SCN3A    | uc002ucx.3 | Missense_Mutation | SNP | 37 |
| 7 | C18orf54 | uc002lfo.4 | Silent            | SNP | 37 |
| 7 | EIF2AK3  | uc002stc.4 | Missense_Mutation | SNP | 37 |
| 7 | PLEKHM1  | uc002ija.3 | Silent            | SNP | 37 |
| 7 | UGT2B15  | uc021xow.1 | 3'UTR             | SNP | 37 |
| 7 | MMP1     | uc001phi.2 | Silent            | SNP | 37 |

|   |             |            |                       |     |    |
|---|-------------|------------|-----------------------|-----|----|
| 7 | ZFHX4       | uc003yau.2 | Missense_Mutation     | SNP | 37 |
| 7 | E2F2        | uc001bhe.2 | Missense_Mutation     | SNP | 37 |
| 7 | PDLIM3      | uc003ixw.4 | Silent                | SNP | 37 |
| 7 | SNTG2       | uc002qwq.3 | Silent                | SNP | 37 |
| 7 | LPPR4       | uc001dse.3 | Nonsense_Mutation     | SNP | 37 |
| 7 | IFNA7       | uc003zop.1 | Missense_Mutation     | SNP | 37 |
| 7 | CHRNA1      | uc002ujd.2 | Silent                | SNP | 37 |
| 7 | MTCP1NB     | uc004fmy.3 | Missense_Mutation     | SNP | 37 |
| 7 | ACCS        | uc009yks.1 | Missense_Mutation     | SNP | 37 |
| 7 | FAM129A     | uc001gra.3 | Missense_Mutation     | SNP | 37 |
| 7 | OR5B2       | uc010rkg.2 | Missense_Mutation     | SNP | 37 |
| 7 | TMEM87B     | uc002thm.2 | Missense_Mutation     | SNP | 37 |
| 7 | OR9G9       | uc010rjn.2 | Silent                | SNP | 37 |
| 7 | SLC9A2      | uc002tca.3 | Silent                | SNP | 37 |
| 7 | SCN11A      | uc021wvy.1 | Silent                | SNP | 37 |
| 7 | HTR4        | uc021yfk.1 | 3'UTR                 | SNP | 37 |
| 7 | NLRP11      | uc010ygf.2 | Missense_Mutation     | SNP | 37 |
| 7 | CHRM3       | uc001hyp.3 | Nonsense_Mutation     | SNP | 37 |
| 7 | CYP4F24P    | uc010xor.1 | Splice_Site           | SNP | 37 |
| 7 | EIF3L       | uc003auf.3 | 5'UTR                 | SNP | 37 |
| 7 | UBE4B       | uc021ogc.1 | Silent                | SNP | 37 |
| 7 | ZFP161      | uc002kmq.3 | Missense_Mutation     | SNP | 37 |
| 7 | PRPF8       | uc002fte.3 | Missense_Mutation     | SNP | 37 |
| 7 | SLC22A3     | uc003qti.3 | 3'UTR                 | SNP | 37 |
| 7 | COG3        | uc001vak.3 | Missense_Mutation     | SNP | 37 |
| 7 | ACTRT2      | uc001ajz.3 | Missense_Mutation     | SNP | 37 |
| 7 | SNORD115-15 | uc001yzq.1 | Intron                | SNP | 37 |
| 7 | MYO5B       | uc002leb.2 | Silent                | SNP | 37 |
| 7 | F8          | uc004fmt.3 | Missense_Mutation     | SNP | 37 |
| 7 | AL117485    | uc002zof.3 | 5'Flank               | SNP | 37 |
| 7 | HEATR1      | uc001hyd.2 | Missense_Mutation     | SNP | 37 |
| 7 | DQ656008    | uc001maa.3 | Non-coding_Transcript | SNP | 37 |
| 7 | TP53BP1     | uc001zrr.4 | Missense_Mutation     | SNP | 37 |
| 7 | THSD7A      | uc021zzo.1 | Nonsense_Mutation     | SNP | 37 |
| 7 | OR4D9       | uc010rkv.2 | Missense_Mutation     | SNP | 37 |
| 7 | ASPSCR1     | uc002kcy.3 | Silent                | SNP | 37 |
| 7 | NR1H4       | uc001tht.2 | Missense_Mutation     | SNP | 37 |
| 7 | SEC14L3     | uc003ahy.3 | Missense_Mutation     | SNP | 37 |
| 7 | B4GALT2     | uc010okl.2 | Missense_Mutation     | SNP | 37 |
| 7 | MAFIP       | uc011clu.2 | Intron                | SNP | 37 |
| 7 | PITPNM2     | uc001uej.1 | Missense_Mutation     | SNP | 37 |
| 7 | TLR10       | uc003gtj.3 | Missense_Mutation     | SNP | 37 |
| 7 | ANO1        | uc001opj.3 | Missense_Mutation     | SNP | 37 |

|   |           |            |                       |     |    |
|---|-----------|------------|-----------------------|-----|----|
| 7 | NCOA2     | uc003xyn.1 | Missense_Mutation     | SNP | 37 |
| 7 | DDX4      | uc003jqg.4 | Missense_Mutation     | SNP | 37 |
| 7 | CNTNAP4   | uc002fex.1 | Silent                | SNP | 37 |
| 7 | TRPM2     | uc010gpt.1 | Missense_Mutation     | SNP | 37 |
| 7 | MUC16     | uc002mkp.3 | Missense_Mutation     | SNP | 37 |
| 7 | TDGF1P3   | uc004eos.1 | Non-coding_Transcript | SNP | 37 |
| 7 | HP1BP3    | uc001bdw.1 | Missense_Mutation     | SNP | 37 |
| 7 | HYDIN     | uc002ezr.3 | Missense_Mutation     | SNP | 37 |
| 7 | GPR174    | uc004edg.1 | Silent                | SNP | 37 |
| 7 | IGBP1P1   | uc010tpo.1 | Non-coding_Transcript | SNP | 37 |
| 7 | ASXL3     | uc010dmg.1 | Missense_Mutation     | SNP | 37 |
| 7 | CACNA1C   | uc009zdu.1 | Silent                | SNP | 37 |
| 7 | KCNH8     | uc003cbk.1 | Nonsense_Mutation     | SNP | 37 |
| 7 | ZBP2      | uc002hte.3 | Nonsense_Mutation     | SNP | 37 |
| 7 | CD209     | uc002mht.2 | 3'UTR                 | SNP | 37 |
| 7 | UGT1A1    | uc002vut.3 | Missense_Mutation     | SNP | 37 |
| 7 | KLF15     | uc011bkk.1 | Silent                | SNP | 37 |
| 7 | PEX6      | uc003otf.3 | Missense_Mutation     | SNP | 37 |
| 7 | MYOF      | uc001kin.3 | Silent                | SNP | 37 |
| 7 | PLCXD2    | uc003dya.3 | Missense_Mutation     | SNP | 37 |
| 7 | DAB1      | uc001cys.1 | Missense_Mutation     | SNP | 37 |
| 7 | HEXA      | uc010ukn.2 | Intron                | SNP | 37 |
| 7 | ZNF702P   | uc002qan.4 | Non-coding_Transcript | SNP | 37 |
| 7 | C15orf2   | uc001ywo.3 | Missense_Mutation     | SNP | 37 |
| 7 | RALGAPA1  | uc001wtj.3 | Silent                | SNP | 37 |
| 7 | COL7A1    | uc003ctz.2 | Splice_Site           | SNP | 37 |
| 7 | SNAP91    | uc021zcf.1 | Splice_Site           | SNP | 37 |
| 7 | IGSF10    | uc011bod.2 | Missense_Mutation     | SNP | 37 |
| 7 | LRRC10    | uc001svc.3 | Missense_Mutation     | SNP | 37 |
| 7 | ALPL      | uc001bet.3 | Silent                | SNP | 37 |
| 7 | C9orf131  | uc003zvw.3 | Silent                | SNP | 37 |
| 7 | SS18L1    | uc011aaa.1 | Silent                | SNP | 37 |
| 7 | VSTM4     | uc001jhf.2 | 3'UTR                 | SNP | 37 |
| 7 | OFD1      | uc004cvp.4 | Silent                | SNP | 37 |
| 7 | LYST      | uc009xga.1 | 3'UTR                 | SNP | 37 |
| 7 | FLNB      | uc010hne.2 | Missense_Mutation     | SNP | 37 |
| 7 | USP32     | uc002iyo.1 | Missense_Mutation     | SNP | 37 |
| 7 | KIAA2022  | uc004eby.3 | Missense_Mutation     | SNP | 37 |
| 7 | GUCY2D    | uc002gjt.2 | Missense_Mutation     | SNP | 37 |
| 7 | NUP160    | uc001ngm.3 | Silent                | SNP | 37 |
| 7 | LOC440041 | uc021qjb.1 | Non-coding_Transcript | SNP | 37 |
| 7 | URI1      | uc002nsr.3 | Silent                | SNP | 37 |
| 7 | OR51S1    | uc010qyo.2 | Silent                | SNP | 37 |

|   |           |            |                       |     |    |
|---|-----------|------------|-----------------------|-----|----|
| 7 | OR8D4     | uc010saa.2 | Missense_Mutation     | SNP | 37 |
| 7 | CDC42BPB  | uc001ymi.1 | Missense_Mutation     | SNP | 37 |
| 7 | IFNG      | uc001stw.1 | 5'UTR                 | SNP | 37 |
| 7 | VPS13B    | uc003yiv.3 | Missense_Mutation     | SNP | 37 |
| 7 | abParts   | uc021ser.1 | Non-coding_Transcript | SNP | 37 |
| 7 | KIR2DL1   | uc002qgx.3 | 3'UTR                 | SNP | 37 |
| 7 | UBE3B     | uc001top.3 | Missense_Mutation     | SNP | 37 |
| 7 | CA6       | uc001apm.3 | Silent                | SNP | 37 |
| 7 | RPL13AP20 | uc010sho.2 | Missense_Mutation     | SNP | 37 |
| 7 | DDX4      | uc003jqg.4 | Nonsense_Mutation     | SNP | 37 |
| 7 | LYZL6     | uc002hkJ.2 | Silent                | SNP | 37 |
| 7 | BPIFB2    | uc002wyj.3 | Missense_Mutation     | SNP | 37 |
| 7 | CDSN      | uc003nsm.2 | Missense_Mutation     | SNP | 37 |
| 7 | PAX5      | uc003zso.1 | Missense_Mutation     | SNP | 37 |
| 7 | SGK223    | uc003wsh.4 | Silent                | SNP | 37 |
| 7 | TRIM37    | uc002iwy.4 | Missense_Mutation     | SNP | 37 |
| 7 | MYO5C     | uc010bff.3 | Intron                | SNP | 37 |
| 7 | ANKRD7    | uc003vji.3 | Silent                | SNP | 37 |
| 7 | CSMD3     | uc003ynu.3 | Missense_Mutation     | SNP | 37 |
| 7 | EPHA10    | uc009vvi.3 | Missense_Mutation     | SNP | 37 |
| 7 | abParts   | uc021ser.1 | Intron                | SNP | 37 |
| 7 | PLAA      | uc003zqd.3 | 3'UTR                 | SNP | 37 |
| 7 | MUC21     | uc003nsh.2 | Missense_Mutation     | SNP | 37 |
| 7 | CBL       | uc001pwe.3 | Silent                | SNP | 37 |
| 7 | CD1C      | uc001fru.3 | Nonsense_Mutation     | SNP | 37 |
| 7 | ACSBG1    | uc002bdh.3 | Missense_Mutation     | SNP | 37 |
| 7 | SYAP1     | uc004cxp.3 | Silent                | SNP | 37 |
| 7 | HERC2     | uc001zjb.3 | Missense_Mutation     | SNP | 37 |
| 7 | TRIM71    | uc003cff.3 | Silent                | SNP | 37 |
| 7 | ZBPB2     | uc002hte.3 | Missense_Mutation     | SNP | 37 |
| 7 | ADAM7     | uc003xeb.3 | Missense_Mutation     | SNP | 37 |
| 7 | NLRP13    | uc010ygg.2 | Missense_Mutation     | SNP | 37 |
| 7 | FAM179B   | uc001www.3 | Missense_Mutation     | SNP | 37 |
| 7 | TUT1      | uc001nto.2 | Missense_Mutation     | SNP | 37 |
| 7 | SYCP2L    | uc003mzo.3 | Missense_Mutation     | SNP | 37 |
| 7 | GIF       | uc001noi.3 | 3'UTR                 | SNP | 37 |
| 7 | LOC645166 | uc010pbc.1 | Non-coding_Transcript | SNP | 37 |
| 7 | C12orf10  | uc001scp.4 | Missense_Mutation     | SNP | 37 |
| 7 | NOS1      | uc001twn.2 | Missense_Mutation     | SNP | 37 |
| 7 | FAM69B    | uc004cik.3 | Silent                | SNP | 37 |
| 7 | ATRX      | uc004ecp.4 | Missense_Mutation     | SNP | 37 |
| 7 | ABCA4     | uc001dqh.3 | Missense_Mutation     | SNP | 37 |
| 7 | DNHD1     | uc001mdp.3 | 3'UTR                 | SNP | 37 |

|   |          |            |                   |     |    |
|---|----------|------------|-------------------|-----|----|
| 7 | TNXB     | uc003nzi.2 | Silent            | SNP | 37 |
| 7 | RSPH10B  | uc003sqw.1 | 5'Flank           | SNP | 37 |
| 7 | GBP5     | uc001dnc.3 | Silent            | SNP | 37 |
| 7 | PABPC5   | uc004efg.3 | Missense_Mutation | SNP | 37 |
| 7 | SNX10    | uc011jzg.2 | Missense_Mutation | SNP | 37 |
| 7 | GPR4     | uc002pcm.3 | Missense_Mutation | SNP | 37 |
| 7 | UGT2B11  | uc003heh.3 | Missense_Mutation | SNP | 37 |
| 7 | EYA4     | uc011ecs.2 | Silent            | SNP | 37 |
| 7 | OR52E8   | uc010qzr.2 | Silent            | SNP | 37 |
| 7 | SCN9A    | uc010fpl.3 | Nonsense_Mutation | SNP | 37 |
| 7 | ELF4     | uc004evd.4 | Missense_Mutation | SNP | 37 |
| 7 | SSH2     | uc010wbh.1 | Missense_Mutation | SNP | 37 |
| 7 | OR5T3    | uc010rjd.2 | Silent            | SNP | 37 |
| 7 | MAGEC2   | uc004fbu.2 | Missense_Mutation | SNP | 37 |
| 7 | FAM154B  | uc002bgv.3 | Missense_Mutation | SNP | 37 |
| 7 | MS4A8B   | uc001npv.3 | Silent            | SNP | 37 |
| 7 | PEAK1    | uc021sqy.1 | Missense_Mutation | SNP | 37 |
| 7 | ARSF     | uc022brz.1 | Missense_Mutation | SNP | 37 |
| 7 | IL1RL1   | uc002tbu.1 | Missense_Mutation | SNP | 37 |
| 7 | UNC45B   | uc002hja.3 | Missense_Mutation | SNP | 37 |
| 7 | TMEM150C | uc011ccj.1 | Splice_Site       | SNP | 37 |
| 7 | GPR128   | uc003duc.3 | Missense_Mutation | SNP | 37 |
| 7 | CAMLG    | uc003kzt.3 | Missense_Mutation | SNP | 37 |
| 7 | APOA5    | uc009ygz.3 | Missense_Mutation | SNP | 37 |
| 7 | LY6E     | uc003yxn.2 | Missense_Mutation | SNP | 37 |
| 7 | GLOD5    | uc011mmh.2 | Missense_Mutation | SNP | 37 |
| 7 | TNS3     | uc003tnw.3 | Missense_Mutation | SNP | 37 |
| 7 | Unknown  |            | IGR               | SNP | 37 |
| 7 | MAMLD1   | uc011mxu.2 | 5'UTR             | SNP | 37 |
| 7 | GRM3     | uc003uid.3 | Silent            | SNP | 37 |
| 7 | OR2M2    | uc010pzf.2 | Silent            | SNP | 37 |
| 7 | CTIF     | uc002ldd.3 | Silent            | SNP | 37 |
| 7 | GRPEL2   | uc003lqj.3 | 3'UTR             | SNP | 37 |
| 7 | SGK223   | uc003wsh.4 | Missense_Mutation | SNP | 37 |
| 7 | CSF1R    | uc003lrl.3 | Missense_Mutation | SNP | 37 |
| 7 | TST      | uc003aqg.3 | Missense_Mutation | SNP | 37 |
| 7 | CD163L1  | uc010sge.2 | Nonsense_Mutation | SNP | 37 |
| 7 | OR2G2    | uc010ppy.2 | Silent            | SNP | 37 |
| 7 | MAGEE1   | uc004ecm.2 | 3'UTR             | SNP | 37 |
| 7 | FYCO1    | uc011bal.1 | Nonsense_Mutation | SNP | 37 |
| 7 | RPL37    | uc003jme.1 | 5'UTR             | SNP | 37 |
| 7 | SLIT2    | uc003gpr.1 | Missense_Mutation | SNP | 37 |
| 7 | PNMAL1   | uc002peq.4 | 3'UTR             | SNP | 37 |



|   |         |            |                   |     |    |
|---|---------|------------|-------------------|-----|----|
| 7 | PRAM1   | uc002mkd.3 | Silent            | SNP | 37 |
| 7 | DIAPH1  | uc003llb.4 | Silent            | SNP | 37 |
| 7 | MCM3AP  | uc002ziq.1 | 5'UTR             | SNP | 37 |
| 7 | PCNXL2  | uc001hvl.2 | Silent            | SNP | 37 |
| 7 | MUC16   | uc002mkp.3 | Missense_Mutation | SNP | 37 |
| 7 | SENP7   | uc003dut.3 | Silent            | SNP | 37 |
| 7 | CHRM3   | uc001hyp.3 | Missense_Mutation | SNP | 37 |
| 7 | DIS3L2  | uc010fxz.3 | Missense_Mutation | SNP | 37 |
| 7 | MAPK7   | uc002gvn.3 | 3'UTR             | SNP | 37 |
| 7 | SYT1    | uc001sys.3 | Missense_Mutation | SNP | 37 |
| 7 | SCARF2  | uc002zsj.2 | Missense_Mutation | SNP | 37 |
| 7 | ZNF667  | uc002qne.3 | Missense_Mutation | SNP | 37 |
| 7 | FSTL4   | uc003kyn.1 | Missense_Mutation | SNP | 37 |
| 7 | MGAT4A  | uc002sze.3 | Missense_Mutation | SNP | 37 |
| 7 | FSTL5   | uc003iqh.3 | Silent            | SNP | 37 |
| 7 | CR2     | uc001hfv.3 | Missense_Mutation | SNP | 37 |
| 7 | SYMPK   | uc002pdn.3 | Silent            | SNP | 37 |
| 7 | PREX2   | uc003xxv.1 | Intron            | SNP | 37 |
| 7 | OPN1LW  | uc004fjz.4 | Silent            | SNP | 37 |
| 7 | LAS1L   | uc004dwa.2 | Silent            | SNP | 37 |
| 7 | OR2A14  | uc011kua.2 | Missense_Mutation | SNP | 37 |
| 7 | ANO4    | uc010svm.1 | Missense_Mutation | SNP | 37 |
| 7 | KIR2DL2 | uc002quc.4 | Silent            | SNP | 37 |
| 7 | FAT4    | uc003ifj.4 | Missense_Mutation | SNP | 37 |
| 7 | PSG3    | uc002ovd.1 | Silent            | SNP | 37 |
| 7 | PCDHB4  | uc003lip.1 | Missense_Mutation | SNP | 37 |
| 7 | MUC6    | uc001lsw.2 | Missense_Mutation | SNP | 37 |
| 7 | FEN1    | uc001nsg.3 | Missense_Mutation | SNP | 37 |
| 7 | RBMX2   | uc004evt.3 | Silent            | SNP | 37 |
| 7 | DOCK2   | uc003maf.3 | Missense_Mutation | SNP | 37 |
| 7 | MLL2    | uc001rta.4 | Missense_Mutation | SNP | 37 |
| 7 | PKD2L1  | uc001kqx.1 | Missense_Mutation | SNP | 37 |
| 7 | LPCAT2  | uc002eie.4 | Missense_Mutation | SNP | 37 |
| 7 | CXorf36 | uc004dgg.2 | Missense_Mutation | SNP | 37 |
| 7 | ELOVL7  | uc003jsi.4 | Silent            | SNP | 37 |
| 7 | AOC3    | uc002ibv.3 | 3'UTR             | SNP | 37 |
| 7 | OR4S1   | uc010rhu.2 | Missense_Mutation | SNP | 37 |
| 7 | PCDHAC2 | uc003lhb.2 | Silent            | SNP | 37 |
| 7 | KCNG4   | uc010voc.2 | Missense_Mutation | SNP | 37 |
| 7 | PCK1    | uc002xyn.4 | Silent            | SNP | 37 |
| 7 | CSMD3   | uc003ynu.3 | 5'UTR             | SNP | 37 |
| 7 | ROR1    | uc001dbj.2 | Missense_Mutation | SNP | 37 |
| 7 | ABCA3   | uc002cpy.1 | Silent            | SNP | 37 |

|   |           |            |                   |     |    |
|---|-----------|------------|-------------------|-----|----|
| 7 | RPS6KA5   | uc001xyt.3 | 3'UTR             | SNP | 37 |
| 7 | FMO3      | uc001ghi.3 | Missense_Mutation | SNP | 37 |
| 7 | NETO1     | uc002lkw.3 | Silent            | SNP | 37 |
| 7 | IRGC      | uc002oxh.3 | Missense_Mutation | SNP | 37 |
| 7 | CCDC135   | uc002emi.3 | Missense_Mutation | SNP | 37 |
| 7 | ZNF561    | uc002mlu.3 | 5'UTR             | SNP | 37 |
| 7 | NOS1      | uc001twn.2 | 3'UTR             | SNP | 37 |
| 7 | CHAD      | uc010dbr.3 | Missense_Mutation | SNP | 37 |
| 7 | MAGEC1    | uc004fht.3 | Missense_Mutation | SNP | 37 |
| 7 | PLEKHM1   | uc002ija.3 | Missense_Mutation | SNP | 37 |
| 7 | NLRP3     | uc001icr.3 | Missense_Mutation | SNP | 37 |
| 7 | AFF2      | uc004fcp.3 | 3'UTR             | SNP | 37 |
| 7 | DNAJC5B   | uc003xvs.1 | Missense_Mutation | SNP | 37 |
| 7 | CDH26     | uc002ybe.3 | 5'UTR             | SNP | 37 |
| 7 | EHD1      | uc010rnq.1 | Silent            | SNP | 37 |
| 7 | SCN10A    | uc003ciq.3 | Missense_Mutation | SNP | 37 |
| 7 | BCL11B    | uc001yga.3 | Silent            | SNP | 37 |
| 7 | CUZD1     | uc001lgs.3 | Silent            | SNP | 37 |
| 7 | NHP2L1    | uc003bat.3 | Silent            | SNP | 37 |
| 7 | ROBO4     | uc001qbg.3 | Nonsense_Mutation | SNP | 37 |
| 7 | CYP2E1    | uc001lnl.1 | 3'UTR             | SNP | 37 |
| 7 | ADAMDEC1  | uc003xdz.2 | Missense_Mutation | SNP | 37 |
| 7 | VWC2      | uc003tot.1 | Missense_Mutation | SNP | 37 |
| 7 | TAS2R60   | uc011ktg.2 | Silent            | SNP | 37 |
| 7 | PCDHGC5   | uc003ljk.2 | Missense_Mutation | SNP | 37 |
| 7 | SNED1     | uc002wah.1 | Missense_Mutation | SNP | 37 |
| 7 | CACNG1    | uc002jfu.3 | Missense_Mutation | SNP | 37 |
| 7 | PCDP1     | uc002tmb.3 | Splice_Site       | SNP | 37 |
| 7 | GRM3      | uc003uid.3 | 5'UTR             | SNP | 37 |
| 7 | CDK5RAP1  | uc010gek.3 | Missense_Mutation | SNP | 37 |
| 7 | Unknown   |            | IGR               | SNP | 37 |
| 7 | URI1      | uc002nsr.3 | Missense_Mutation | SNP | 37 |
| 7 | OR10A3    | uc010rbi.2 | Missense_Mutation | SNP | 37 |
| 7 | MAP7D2    | uc010nfo.2 | Missense_Mutation | SNP | 37 |
| 7 | OR2A2     | uc011ktz.2 | Missense_Mutation | SNP | 37 |
| 7 | GZMA      | uc003jpm.3 | Missense_Mutation | SNP | 37 |
| 7 | WDR25     | uc010avx.3 | Missense_Mutation | SNP | 37 |
| 7 | FCRL2     | uc001fre.2 | Missense_Mutation | SNP | 37 |
| 7 | SIM1      | uc003pqj.4 | Missense_Mutation | SNP | 37 |
| 7 | FAM5C     | uc001gse.1 | 3'UTR             | SNP | 37 |
| 7 | NREP      | uc011cvr.2 | 3'UTR             | SNP | 37 |
| 7 | FAM188B   | uc011kac.1 | 3'UTR             | SNP | 37 |
| 7 | LOC255025 | uc003drn.3 | Splice_Site       | SNP | 37 |

|   |            |            |                       |     |    |
|---|------------|------------|-----------------------|-----|----|
| 7 | ANO1       | uc001opj.3 | Silent                | SNP | 37 |
| 7 | TCRA       | uc001wcq.3 | Missense_Mutation     | SNP | 37 |
| 7 | GRK7       | uc011bnd.2 | Missense_Mutation     | SNP | 37 |
| 7 | DOCK11     | uc004eqp.2 | Silent                | SNP | 37 |
| 7 | NEDD4      | uc002adj.3 | Missense_Mutation     | SNP | 37 |
| 7 | SCGB1D2    | uc001ntb.3 | Missense_Mutation     | SNP | 37 |
| 7 | ZNF99      | uc021urt.1 | 3'UTR                 | SNP | 37 |
| 7 | TAS2R39    | uc011ksw.2 | Missense_Mutation     | SNP | 37 |
| 7 | GSR        | uc003xih.2 | Missense_Mutation     | SNP | 37 |
| 7 | PHAX       | uc003kua.2 | Missense_Mutation     | SNP | 37 |
| 7 | MLL2       | uc001rta.4 | Missense_Mutation     | SNP | 37 |
| 7 | MYH14      | uc010enu.1 | Missense_Mutation     | SNP | 37 |
| 7 | ABCC10     | uc003ouy.1 | Silent                | SNP | 37 |
| 7 | PEG3       | uc002qnu.2 | Nonsense_Mutation     | SNP | 37 |
| 7 | CST2       | uc002wtq.1 | 3'UTR                 | SNP | 37 |
| 7 | AKAP13     | uc002blu.1 | Silent                | SNP | 37 |
| 7 | ZNF831     | uc002yan.3 | Missense_Mutation     | SNP | 37 |
| 7 | PADI1      | uc001bah.1 | Silent                | SNP | 37 |
| 7 | NEK10      | uc010hfk.3 | Missense_Mutation     | SNP | 37 |
| 7 | COL6A3     | uc002vwl.2 | Silent                | SNP | 37 |
| 7 | SCN10A     | uc003ciq.3 | Missense_Mutation     | SNP | 37 |
| 7 | GPR75-ASB3 | uc002rxl.4 | Missense_Mutation     | SNP | 37 |
| 7 | HMGB3P1    | uc002xax.3 | Non-coding_Transcript | SNP | 37 |
| 7 | OR5L1      | uc001nhw.1 | Missense_Mutation     | SNP | 37 |
| 7 | F8         | uc004fmt.3 | Silent                | SNP | 37 |
| 7 | FLNB       | uc010hne.2 | Missense_Mutation     | SNP | 37 |
| 7 | CLPS       | uc003ole.2 | Silent                | SNP | 37 |
| 7 | NEK8       | uc002hcp.3 | Missense_Mutation     | SNP | 37 |
| 7 | DIDO1      | uc002ydr.2 | Missense_Mutation     | SNP | 37 |
| 7 | AGAP2      | uc001spr.3 | 5'UTR                 | SNP | 37 |
| 7 | CCDC63     | uc001trv.1 | Missense_Mutation     | SNP | 37 |
| 7 | KIAA2026   | uc003zjq.4 | Missense_Mutation     | SNP | 37 |
| 7 | ZNF284     | uc002oyg.1 | Missense_Mutation     | SNP | 37 |
| 7 | FERMT1     | uc002wmr.3 | Silent                | SNP | 37 |
| 7 | SIAH3      | uc001vap.3 | Missense_Mutation     | SNP | 37 |
| 7 | HGFAC      | uc010icw.3 | Silent                | SNP | 37 |
| 7 | FAT2       | uc003lue.4 | Missense_Mutation     | SNP | 37 |
| 7 | PIP5K1P1   | uc003mxx.4 | Missense_Mutation     | SNP | 37 |
| 7 | LEKR1      | uc021xgh.1 | Silent                | SNP | 37 |
| 7 | CNTN5      | uc001pga.3 | Missense_Mutation     | SNP | 37 |
| 7 | PCDHGC5    | uc003ljm.2 | Missense_Mutation     | SNP | 37 |
| 7 | CYP2C19    | uc010qnz.2 | Silent                | SNP | 37 |
| 7 | ANKRD20A9P | uc010tcj.1 | Non-coding_Transcript | SNP | 37 |

|   |               |            |                       |     |    |
|---|---------------|------------|-----------------------|-----|----|
| 7 | AKR1D1        | uc003vtz.3 | Missense_Mutation     | SNP | 37 |
| 7 | MAOB          | uc011mkx.2 | Missense_Mutation     | SNP | 37 |
| 7 | SCFD2         | uc003gzu.3 | Missense_Mutation     | SNP | 37 |
| 7 | TTC40         | uc021qbc.1 | Missense_Mutation     | SNP | 37 |
| 7 | PTCHD3        | uc001itu.2 | Missense_Mutation     | SNP | 37 |
| 7 | PEG3          | uc002qnv.2 | 5'UTR                 | SNP | 37 |
| 7 | SPRED2        | uc002sdr.4 | 3'UTR                 | SNP | 37 |
| 7 | TSSK3         | uc001bvf.3 | Silent                | SNP | 37 |
| 7 | REG4          | uc001eig.3 | 3'UTR                 | SNP | 37 |
| 7 | CMYA5         | uc003kgc.3 | Missense_Mutation     | SNP | 37 |
| 7 | MAGEA4        | uc022cgu.1 | Silent                | SNP | 37 |
| 7 | CTIF          | uc002idd.3 | Missense_Mutation     | SNP | 37 |
| 7 | C15orf57      | uc001zma.1 | Intron                | SNP | 37 |
| 7 | DSCAM         | uc002yyq.1 | Silent                | SNP | 37 |
| 7 | IL9           | uc003lbb.1 | 3'UTR                 | SNP | 37 |
| 7 | FGFR1         | uc011lbu.2 | Missense_Mutation     | SNP | 37 |
| 7 | SPINLW1-WFDC6 | uc010zxc.2 | Silent                | SNP | 37 |
| 7 | ANO3          | uc001mqt.4 | Silent                | SNP | 37 |
| 7 | DQ576853      | uc011ajp.1 | 5'Flank               | SNP | 37 |
| 7 | NNAT          | uc002xhd.3 | 5'UTR                 | SNP | 37 |
| 7 | CRP           | uc001ftw.3 | Missense_Mutation     | SNP | 37 |
| 7 | PKHD1L1       | uc003yne.3 | Missense_Mutation     | SNP | 37 |
| 7 | ZNF577        | uc010yde.2 | Silent                | SNP | 37 |
| 7 | SCN1B         | uc002nxo.2 | Missense_Mutation     | SNP | 37 |
| 7 | KLK2          | uc010ycl.2 | Missense_Mutation     | SNP | 37 |
| 7 | FLJ36000      | uc002gza.2 | Non-coding_Transcript | SNP | 37 |
| 7 | KPNA4         | uc003fdn.3 | 3'UTR                 | SNP | 37 |
| 7 | ANKRD18A      | uc004abf.1 | 3'UTR                 | SNP | 37 |
| 7 | PPP1R10       | uc003nqn.1 | Silent                | SNP | 37 |
| 7 | MYO18B        | uc003abz.1 | Missense_Mutation     | SNP | 37 |
| 7 | WAS           | uc004dkm.4 | Missense_Mutation     | SNP | 37 |
| 7 | TATDN2        | uc003bvg.2 | Silent                | SNP | 37 |
| 7 | PCLO          | uc010lec.3 | Nonsense_Mutation     | SNP | 37 |
| 7 | SMARCAL1      | uc002vgc.4 | Missense_Mutation     | SNP | 37 |
| 7 | BIN2          | uc001ryg.3 | Silent                | SNP | 37 |
| 7 | ALPL          | uc001bet.3 | Silent                | SNP | 37 |
| 7 | GPR50         | uc010ntg.2 | Missense_Mutation     | SNP | 37 |
| 7 | WISP1         | uc003yub.3 | Splice_Site           | SNP | 37 |
| 7 | CCNB3         | uc004dox.4 | Missense_Mutation     | SNP | 37 |
| 7 | NEK1          | uc003isd.2 | Missense_Mutation     | SNP | 37 |
| 7 | SPATA7        | uc001xwq.3 | Silent                | SNP | 37 |
| 7 | AKAP13        | uc002blu.1 | Missense_Mutation     | SNP | 37 |
| 7 | SDR16C5       | uc010lyk.1 | Silent                | SNP | 37 |

|   |            |            |                       |     |    |
|---|------------|------------|-----------------------|-----|----|
| 7 | GP6        | uc002qil.3 | Splice_Site           | SNP | 37 |
| 7 | NRL        | uc001wlo.3 | Missense_Mutation     | SNP | 37 |
| 7 | ARHGEF10   | uc003wpr.3 | Missense_Mutation     | SNP | 37 |
| 7 | DNER       | uc002vpv.3 | Silent                | SNP | 37 |
| 7 | NOS1       | uc001twn.2 | Missense_Mutation     | SNP | 37 |
| 7 | OR52N4     | uc001mbu.3 | Silent                | SNP | 37 |
| 7 | MVD        | uc002flg.1 | Missense_Mutation     | SNP | 37 |
| 7 | COL21A1    | uc003pcs.3 | Missense_Mutation     | SNP | 37 |
| 7 | KALRN      | uc003ehg.3 | Missense_Mutation     | SNP | 37 |
| 7 | C1orf173   | uc001dgg.3 | Missense_Mutation     | SNP | 37 |
| 7 | FETUB      | uc010hyq.3 | Silent                | SNP | 37 |
| 7 | CSMD1      | uc022aqr.1 | Missense_Mutation     | SNP | 37 |
| 7 | ADAMTS7    | uc002bej.4 | Silent                | SNP | 37 |
| 7 | OTOF       | uc002rhk.3 | Silent                | SNP | 37 |
| 7 | DPYD       | uc001drv.3 | Missense_Mutation     | SNP | 37 |
| 7 | PLXDC1     | uc002hrg.2 | Missense_Mutation     | SNP | 37 |
| 7 | LRR37BP1   | uc002hfl.3 | 5'UTR                 | SNP | 37 |
| 7 | SPN        | uc002dtm.3 | Silent                | SNP | 37 |
| 7 | CRYGD      | uc002vcn.4 | 3'UTR                 | SNP | 37 |
| 7 | HLA-G      | uc003raj.3 | Silent                | SNP | 37 |
| 7 | NEK10      | uc010hfk.3 | Missense_Mutation     | SNP | 37 |
| 7 | VSIG4      | uc004dwh.2 | Silent                | SNP | 37 |
| 7 | CNTN6      | uc003boz.3 | Missense_Mutation     | SNP | 37 |
| 7 | SEH1L      | uc002krr.3 | 3'UTR                 | SNP | 37 |
| 7 | DPY19L2P1  | uc003teq.1 | Missense_Mutation     | SNP | 37 |
| 7 | LRR34C     | uc001mxa.1 | Silent                | SNP | 37 |
| 7 | SPHKAP     | uc002vpq.2 | Missense_Mutation     | SNP | 37 |
| 7 | DNAH11     | uc003svc.3 | Missense_Mutation     | SNP | 37 |
| 7 | ZNF827     | uc003ikn.3 | Silent                | SNP | 37 |
| 7 | SIGLEC8    | uc002pwt.3 | Missense_Mutation     | SNP | 37 |
| 7 | PCDHB18    | uc003ljc.1 | Silent                | SNP | 37 |
| 7 | ISL1       | uc003jor.3 | 3'UTR                 | SNP | 37 |
| 7 | PAK6       | uc010bbl.3 | Missense_Mutation     | SNP | 37 |
| 7 | OR2M7      | uc010pzk.2 | Missense_Mutation     | SNP | 37 |
| 7 | MGAM       | uc003vwy.3 | Missense_Mutation     | SNP | 37 |
| 7 | C1orf168   | uc001cym.4 | Silent                | SNP | 37 |
| 7 | OR4E2      | uc010tmd.2 | Silent                | SNP | 37 |
| 7 | ZNF223     | uc002oyf.1 | Missense_Mutation     | SNP | 37 |
| 7 | INHBE      | uc001snw.3 | Missense_Mutation     | SNP | 37 |
| 7 | PTPN21     | uc001xwv.4 | Missense_Mutation     | SNP | 37 |
| 7 | STXBP5L    | uc003eec.4 | Missense_Mutation     | SNP | 37 |
| 7 | ANKRD20A9P | uc010tcj.1 | Non-coding_Transcript | SNP | 37 |
| 7 | CYP4F8     | uc002nbi.3 | Silent                | SNP | 37 |

|   |          |            |                   |     |    |
|---|----------|------------|-------------------|-----|----|
| 7 | ROBO1    | uc003dqe.2 | Missense_Mutation | SNP | 37 |
| 7 | WIZ      | uc002nbc.3 | 3'UTR             | SNP | 37 |
| 7 | AKAP6    | uc001wrq.3 | Missense_Mutation | SNP | 37 |
| 7 | BBX      | uc010hpr.3 | Missense_Mutation | SNP | 37 |
| 7 | CEP350   | uc001gnt.3 | Missense_Mutation | SNP | 37 |
| 7 | DMWD     | uc002pdj.1 | Missense_Mutation | SNP | 37 |
| 7 | GUCY2D   | uc002gjt.2 | Missense_Mutation | SNP | 37 |
| 7 | KCNH4    | uc002hzb.2 | Missense_Mutation | SNP | 37 |
| 7 | ITIH5    | uc021pmv.1 | Silent            | SNP | 37 |
| 7 | WHSC1    | uc003gdz.4 | Missense_Mutation | SNP | 37 |
| 7 | ZDHHC24  | uc001oin.1 | Missense_Mutation | SNP | 37 |
| 7 | LILRB5   | uc002qfa.1 | 3'UTR             | SNP | 37 |
| 7 | ELOVL3   | uc001kut.3 | 3'UTR             | SNP | 37 |
| 7 | PLXNA2   | uc001hgz.3 | Silent            | SNP | 37 |
| 7 | RGS6     | uc010ttn.2 | 3'UTR             | SNP | 37 |
| 7 | PTPRF    | uc001cjr.3 | Missense_Mutation | SNP | 37 |
| 7 | PSEN1    | uc001xnr.3 | Missense_Mutation | SNP | 37 |
| 7 | OR2Z1    | uc010xkg.2 | Missense_Mutation | SNP | 37 |
| 7 | NTRK3    | uc002bme.2 | Silent            | SNP | 37 |
| 7 | E2F8     | uc001mpm.3 | Missense_Mutation | SNP | 37 |
| 7 | PAMR1    | uc001mwf.3 | Splice_Site       | SNP | 37 |
| 7 | SCN3A    | uc002ucx.3 | Missense_Mutation | SNP | 37 |
| 7 | MARCH11  | uc003jfo.2 | Missense_Mutation | SNP | 37 |
| 7 | MAMLD1   | uc011mxu.2 | 5'UTR             | SNP | 37 |
| 7 | TDRKH    | uc009wnb.1 | Missense_Mutation | SNP | 37 |
| 7 | PREX1    | uc002xtw.1 | Silent            | SNP | 37 |
| 7 | ITGB2    | uc002zgd.2 | Nonsense_Mutation | SNP | 37 |
| 7 | TBXAS1   | uc011kqv.2 | 5'UTR             | SNP | 37 |
| 7 | CXorf22  | uc004ddj.3 | Missense_Mutation | SNP | 37 |
| 7 | ODF2     | uc011mbd.2 | 5'UTR             | SNP | 37 |
| 7 | TRPC4    | uc010abx.3 | Missense_Mutation | SNP | 37 |
| 7 | SNAP91   | uc021zcf.1 | Silent            | SNP | 37 |
| 7 | ACAD9    | uc003ela.4 | Silent            | SNP | 37 |
| 7 | CD83     | uc003nbi.3 | Silent            | SNP | 37 |
| 7 | PCLO     | uc003uhx.2 | Missense_Mutation | SNP | 37 |
| 7 | TCTN3    | uc001klb.4 | Missense_Mutation | SNP | 37 |
| 7 | RRM2B    | uc022azl.1 | Missense_Mutation | SNP | 37 |
| 7 | SLC25A48 | uc003laz.1 | Silent            | SNP | 37 |
| 7 | NDST4    | uc003ibu.3 | Missense_Mutation | SNP | 37 |
| 7 | ITGB6    | uc002ubh.2 | Missense_Mutation | SNP | 37 |
| 7 | TAS1R2   | uc001bba.1 | Silent            | SNP | 37 |
| 7 | OR4E2    | uc010tmd.2 | Missense_Mutation | SNP | 37 |
| 7 | KDM4C    | uc003zkh.3 | Silent            | SNP | 37 |

|   |              |            |                       |     |    |
|---|--------------|------------|-----------------------|-----|----|
| 7 | SIM2         | uc002yvr.2 | Missense_Mutation     | SNP | 37 |
| 7 | KIAA1191     | uc003mdw.3 | Missense_Mutation     | SNP | 37 |
| 7 | NLRP11       | uc010ygf.2 | Missense_Mutation     | SNP | 37 |
| 7 | CLIC2        | uc004fnf.3 | Silent                | SNP | 37 |
| 7 | PTPRT        | uc010ggj.3 | Missense_Mutation     | SNP | 37 |
| 7 | GALNT13      | uc002tyt.4 | Splice_Site           | SNP | 37 |
| 7 | TOX2         | uc010ggo.3 | Silent                | SNP | 37 |
| 7 | HSD3B2       | uc001ehs.3 | Missense_Mutation     | SNP | 37 |
| 7 | PROP1        | uc003mif.1 | Missense_Mutation     | SNP | 37 |
| 7 | OXR1         | uc011lht.2 | Missense_Mutation     | SNP | 37 |
| 7 | ZNF425       | uc003wfv.3 | Missense_Mutation     | SNP | 37 |
| 7 | EMR2         | uc002mzp.1 | Missense_Mutation     | SNP | 37 |
| 7 | CD2AP        | uc003oyw.3 | Silent                | SNP | 37 |
| 7 | PLEKHG5      | uc001anp.1 | Silent                | SNP | 37 |
| 7 | TCTE1        | uc003oxi.2 | Silent                | SNP | 37 |
| 7 | SLC6A5       | uc001mqd.3 | Missense_Mutation     | SNP | 37 |
| 7 | GDI1         | uc011mzo.1 | 3'UTR                 | SNP | 37 |
| 7 | MAB21L1      | uc001uvc.3 | Missense_Mutation     | SNP | 37 |
| 7 | ASXL3        | uc010dmg.1 | Missense_Mutation     | SNP | 37 |
| 7 | BIRC8        | uc002qbk.3 | 5'UTR                 | SNP | 37 |
| 7 | EFNA5        | uc003kol.3 | Missense_Mutation     | SNP | 37 |
| 7 | PREX2        | uc003xxv.1 | Missense_Mutation     | SNP | 37 |
| 7 | RALGAPA2     | uc002wsa.1 | 5'UTR                 | SNP | 37 |
| 7 | JPH2         | uc002xli.1 | Silent                | SNP | 37 |
| 7 | PLCG2        | uc002fgt.3 | Silent                | SNP | 37 |
| 7 | ACCS         | uc010rfn.2 | Missense_Mutation     | SNP | 37 |
| 7 | SPATA7       | uc001xwq.3 | Missense_Mutation     | SNP | 37 |
| 7 | TDRD5        | uc010pnp.2 | Missense_Mutation     | SNP | 37 |
| 7 | IL26         | uc001stx.1 | Nonsense_Mutation     | SNP | 37 |
| 7 | PDCD7        | uc002aol.3 | Missense_Mutation     | SNP | 37 |
| 7 | FAT3         | uc001pdj.4 | Missense_Mutation     | SNP | 37 |
| 7 | ACLY         | uc002hyi.3 | Missense_Mutation     | SNP | 37 |
| 7 | TANC2        | uc002jal.4 | Missense_Mutation     | SNP | 37 |
| 7 | SCRT2        | uc002wec.3 | Missense_Mutation     | SNP | 37 |
| 7 | LOC100499466 | uc002jgq.3 | Non-coding_Transcript | SNP | 37 |
| 7 | CPNE6        | uc001wln.3 | Silent                | SNP | 37 |
| 7 | SH2D3C       | uc004bsc.3 | Silent                | SNP | 37 |
| 7 | GBE1         | uc021xav.1 | Silent                | SNP | 37 |
| 7 | SLC5A1       | uc003amc.3 | Splice_Site           | SNP | 37 |
| 7 | OR8J3        | uc010riz.2 | Missense_Mutation     | SNP | 37 |
| 7 | TREML1       | uc011duc.2 | Splice_Site           | SNP | 37 |
| 7 | SLC22A6      | uc001nwk.3 | Missense_Mutation     | SNP | 37 |
| 7 | GRIN2B       | uc001rbt.2 | Silent                | SNP | 37 |

|   |           |            |                       |     |    |
|---|-----------|------------|-----------------------|-----|----|
| 7 | SIGIRR    | uc001lpg.3 | Splice_Site           | SNP | 37 |
| 7 | DCDC5     | uc009yjk.1 | Nonsense_Mutation     | SNP | 37 |
| 7 | MPP7      | uc001iua.1 | Missense_Mutation     | SNP | 37 |
| 7 | LOC442459 | uc011mrd.1 | Non-coding_Transcript | SNP | 37 |
| 7 | TRPM5     | uc010qxl.2 | 3'UTR                 | SNP | 37 |
| 7 | PRB4      | uc001qzf.1 | Missense_Mutation     | SNP | 37 |
| 7 | LOC645752 | uc010bky.2 | Missense_Mutation     | SNP | 37 |
| 7 | NHS       | uc011mix.2 | Missense_Mutation     | SNP | 37 |
| 7 | ACIN1     | uc001wit.4 | Missense_Mutation     | SNP | 37 |
| 7 | GABRG2    | uc010jjc.3 | Missense_Mutation     | SNP | 37 |
| 7 | PRSS38    | uc001hrh.3 | Missense_Mutation     | SNP | 37 |
| 7 | TRIM9     | uc001wyz.4 | 3'UTR                 | SNP | 37 |
| 7 | ZNF551    | uc002qpw.4 | Missense_Mutation     | SNP | 37 |
| 7 | LPIN1     | uc002rbs.3 | 3'UTR                 | SNP | 37 |
| 7 | DIDO1     | uc002ydr.2 | Missense_Mutation     | SNP | 37 |
| 7 | APOB      | uc002red.3 | Missense_Mutation     | SNP | 37 |
| 7 | SLC22A6   | uc001nwk.3 | Missense_Mutation     | SNP | 37 |
| 7 | C14orf159 | uc001xyw.2 | Missense_Mutation     | SNP | 37 |
| 7 | TFE3      | uc004dmb.3 | 3'UTR                 | SNP | 37 |
| 7 | SLC9A7    | uc004dgu.1 | Silent                | SNP | 37 |
| 7 | PPP1R13L  | uc002pbn.3 | Missense_Mutation     | SNP | 37 |
| 7 | PIK3CB    | uc011bmq.2 | Silent                | SNP | 37 |
| 7 | FAM171B   | uc002ups.3 | Missense_Mutation     | SNP | 37 |
| 7 | GDF11     | uc001shq.3 | Missense_Mutation     | SNP | 37 |
| 7 | TRIOBP    | uc003atr.3 | Missense_Mutation     | SNP | 37 |
| 7 | PRCC      | uc001fqa.3 | Missense_Mutation     | SNP | 37 |
| 7 | TEK       | uc003zqi.4 | Missense_Mutation     | SNP | 37 |
| 7 | CEACAM21  | uc002ore.4 | Missense_Mutation     | SNP | 37 |
| 7 | SSH3      | uc001okj.3 | Missense_Mutation     | SNP | 37 |
| 7 | ALG3      | uc003fne.2 | 3'UTR                 | SNP | 37 |
| 7 | STAT3     | uc002hzl.1 | Silent                | SNP | 37 |
| 7 | VPS13C    | uc002agz.3 | Missense_Mutation     | SNP | 37 |
| 7 | NCOA6     | uc002xav.3 | Silent                | SNP | 37 |
| 7 | FLG       | uc001ezu.1 | Silent                | SNP | 37 |
| 7 | CAB39     | uc002vqx.3 | 5'UTR                 | SNP | 37 |
| 7 | B3GALNT1  | uc003fdv.3 | Missense_Mutation     | SNP | 37 |
| 7 | ADCY8     | uc003ytd.4 | Silent                | SNP | 37 |
| 7 | OAS2      | uc001tuj.3 | Missense_Mutation     | SNP | 37 |
| 7 | PIGO      | uc003zwd.3 | Missense_Mutation     | SNP | 37 |
| 7 | RNF5      | uc003oaj.4 | Silent                | SNP | 37 |
| 7 | NEGR1     | uc001dfw.3 | Missense_Mutation     | SNP | 37 |
| 7 | OTOP2     | uc010wrp.2 | Silent                | SNP | 37 |
| 7 | PCDH18    | uc003ihe.4 | Nonsense_Mutation     | SNP | 37 |



|   |          |            |                       |     |    |
|---|----------|------------|-----------------------|-----|----|
| 7 | OR4Q3    | uc010tkt.2 | Silent                | SNP | 37 |
| 7 | ORC1     | uc001ctt.3 | Silent                | SNP | 37 |
| 7 | IL1RAPL1 | uc004dby.2 | Missense_Mutation     | SNP | 37 |
| 7 | ZGLP1    | uc002mnw.4 | Missense_Mutation     | SNP | 37 |
| 7 | IL22     | uc001sty.1 | 3'UTR                 | SNP | 37 |
| 7 | WDR25    | uc010avx.3 | Missense_Mutation     | SNP | 37 |
| 7 | HRNR     | uc001ezt.1 | Missense_Mutation     | SNP | 37 |
| 7 | MYO1B    | uc010fsg.2 | Missense_Mutation     | SNP | 37 |
| 7 | KLHDC7A  | uc001bax.3 | Silent                | SNP | 37 |
| 7 | EPB49    | uc022asw.1 | Missense_Mutation     | SNP | 37 |
| 7 | KANSL1   | uc002ikc.3 | Missense_Mutation     | SNP | 37 |
| 7 | DAB1     | uc001cys.1 | Silent                | SNP | 37 |
| 7 | ATG14    | uc001xbx.2 | Missense_Mutation     | SNP | 37 |
| 7 | SEC23A   | uc001wup.1 | Missense_Mutation     | SNP | 37 |
| 7 | SHANK2   | uc001oqc.3 | Missense_Mutation     | SNP | 37 |
| 7 | DCHS2    | uc003inw.2 | Missense_Mutation     | SNP | 37 |
| 7 | abParts  | uc001yuj.2 | Non-coding_Transcript | SNP | 37 |
| 7 | HTR1A    | uc011cqt.2 | Silent                | SNP | 37 |
| 7 | CAPN9    | uc001htz.1 | Missense_Mutation     | SNP | 37 |
| 7 | BTBD16   | uc001lgc.1 | Missense_Mutation     | SNP | 37 |
| 7 | ZNF98    | uc002nqt.2 | Missense_Mutation     | SNP | 37 |
| 7 | DENND4C  | uc003znq.3 | Missense_Mutation     | SNP | 37 |
| 7 | DLGAP2   | uc003wpl.3 | Splice_Site           | SNP | 37 |
| 7 | KRT24    | uc002hvd.3 | Missense_Mutation     | SNP | 37 |
| 7 | H1FNT    | uc001rrm.3 | Silent                | SNP | 37 |
| 7 | DCC      | uc002lfe.2 | Silent                | SNP | 37 |
| 7 | PCDHGC5  | uc003lkj.2 | Missense_Mutation     | SNP | 37 |
| 7 | PLCB4    | uc021wam.1 | Missense_Mutation     | SNP | 37 |
| 7 | ZIM3     | uc002qnz.1 | Missense_Mutation     | SNP | 37 |
| 7 | MYH7     | uc001wjx.3 | Missense_Mutation     | SNP | 37 |
| 7 | ANO1     | uc001opj.3 | Missense_Mutation     | SNP | 37 |
| 7 | SERPINA3 | uc010avg.3 | 5'UTR                 | SNP | 37 |
| 7 | BTN3A3   | uc003nhz.3 | Missense_Mutation     | SNP | 37 |
| 7 | ZNF585A  | uc002ofo.1 | Missense_Mutation     | SNP | 37 |
| 7 | CCDC112  | uc003kqz.2 | Missense_Mutation     | SNP | 37 |
| 7 | TSHR     | uc001xvd.1 | Silent                | SNP | 37 |
| 7 | SLITRK4  | uc022cfl.1 | Silent                | SNP | 37 |
| 7 | STAU1    | uc002xud.3 | Silent                | SNP | 37 |
| 7 | PSG4     | uc002ovg.1 | 3'UTR                 | SNP | 37 |
| 7 | CALB2    | uc002faa.4 | 3'UTR                 | SNP | 37 |
| 7 | CCDC164  | uc002rhg.2 | Silent                | SNP | 37 |
| 7 | CBLC     | uc002ozs.3 | Missense_Mutation     | SNP | 37 |
| 7 | ZNF225   | uc002oyj.1 | Silent                | SNP | 37 |

|   |          |            |                   |     |    |
|---|----------|------------|-------------------|-----|----|
| 7 | CACNA1D  | uc003dgu.4 | Silent            | SNP | 37 |
| 7 | PLA2G3   | uc003aka.3 | Silent            | SNP | 37 |
| 7 | KCNC4    | uc009wfr.3 | Missense_Mutation | SNP | 37 |
| 7 | RGPD4    | uc010ywk.2 | Missense_Mutation | SNP | 37 |
| 7 | NTRK2    | uc004anz.1 | 5'UTR             | SNP | 37 |
| 7 | STK10    | uc003mbo.1 | Missense_Mutation | SNP | 37 |
| 7 | ZNF41    | uc004dhs.4 | Missense_Mutation | SNP | 37 |
| 7 | GZMA     | uc003jpm.3 | Silent            | SNP | 37 |
| 7 | FOXP1    | uc021xao.1 | Missense_Mutation | SNP | 37 |
| 7 | RAB3IP   | uc001svp.3 | Silent            | SNP | 37 |
| 7 | PCDH9    | uc001vik.3 | Silent            | SNP | 37 |
| 7 | RIMBP2   | uc001uil.2 | Missense_Mutation | SNP | 37 |
| 7 | C7orf57  | uc003toh.4 | Missense_Mutation | SNP | 37 |
| 7 | CACNA1E  | uc009wxt.3 | Missense_Mutation | SNP | 37 |
| 7 | YWHAE    | uc002fsj.3 | Missense_Mutation | SNP | 37 |
| 7 | EPHA8    | uc001bfx.1 | Missense_Mutation | SNP | 37 |
| 7 | SIGLEC8  | uc002pwt.3 | Missense_Mutation | SNP | 37 |
| 7 | C1orf105 | uc001gik.3 | Silent            | SNP | 37 |
| 7 | GPNMB    | uc003swc.3 | Silent            | SNP | 37 |
| 7 | PDE6B    | uc003gap.3 | Missense_Mutation | SNP | 37 |
| 7 | KLHL13   | uc011mtp.2 | Missense_Mutation | SNP | 37 |
| 7 | MUC6     | uc001lsw.2 | Silent            | SNP | 37 |
| 7 | TEX15    | uc003xil.3 | Missense_Mutation | SNP | 37 |
| 7 | ANKRD10  | uc001vrn.3 | Missense_Mutation | SNP | 37 |
| 7 | CXorf66  | uc004fbb.3 | Missense_Mutation | SNP | 37 |
| 7 | KLK10    | uc002puy.3 | Nonsense_Mutation | SNP | 37 |
| 7 | ORC1     | uc001ctt.3 | Missense_Mutation | SNP | 37 |
| 7 | TCL1B    | uc001yfa.3 | 3'UTR             | SNP | 37 |
| 7 | SPRR2G   | uc009wod.2 | 3'UTR             | SNP | 37 |
| 7 | DBC1     | uc004bkc.2 | Silent            | SNP | 37 |
| 7 | RAC1     | uc003spw.3 | Missense_Mutation | SNP | 37 |
| 7 | MNDA     | uc001fsz.1 | Missense_Mutation | SNP | 37 |
| 7 | LILRB5   | uc010yer.1 | Missense_Mutation | SNP | 37 |
| 7 | PBX3     | uc004bqb.3 | Missense_Mutation | SNP | 37 |
| 7 | PCDHGC5  | uc003lkh.2 | Silent            | SNP | 37 |
| 7 | LRRC4C   | uc001mxa.1 | Missense_Mutation | SNP | 37 |
| 7 | LINGO2   | uc010mjf.1 | Missense_Mutation | SNP | 37 |
| 7 | MAU2     | uc002nmk.4 | Nonsense_Mutation | SNP | 37 |
| 7 | PLCE1    | uc001kjk.3 | Silent            | SNP | 37 |
| 7 | POTEE    | uc002tsn.2 | Silent            | SNP | 37 |
| 7 | SPINK14  | uc003loz.1 | Missense_Mutation | SNP | 37 |
| 7 | NPEPL1   | uc002xzp.3 | 3'UTR             | SNP | 37 |
| 7 | BCL11B   | uc001yga.3 | Missense_Mutation | SNP | 37 |

|   |          |            |                   |     |    |
|---|----------|------------|-------------------|-----|----|
| 7 | SHROOM2  | uc004csu.1 | Missense_Mutation | SNP | 37 |
| 7 | ABTB1    | uc003ejt.3 | Missense_Mutation | SNP | 37 |
| 7 | MTMR7    | uc003wxm.3 | 3'UTR             | SNP | 37 |
| 7 | PABPC3   | uc001upy.3 | Missense_Mutation | SNP | 37 |
| 7 | XIRP2    | uc002udx.3 | Missense_Mutation | SNP | 37 |
| 7 | ESM1     | uc003jpk.3 | 3'UTR             | SNP | 37 |
| 7 | LRFN5    | uc001wvm.3 | Nonsense_Mutation | SNP | 37 |
| 7 | MEI1     | uc003baz.1 | Missense_Mutation | SNP | 37 |
| 7 | KCNJ2    | uc010dfg.3 | Silent            | SNP | 37 |
| 7 | ZNF300   | uc021yfx.1 | Silent            | SNP | 37 |
| 7 | USO1     | uc003hiu.3 | Silent            | SNP | 37 |
| 7 | JAKMIP3  | uc001lkx.4 | Missense_Mutation | SNP | 37 |
| 7 | ACTN2    | uc001hyf.2 | Silent            | SNP | 37 |
| 7 | MC2R     | uc002ksp.1 | Missense_Mutation | SNP | 37 |
| 7 | MPZL2    | uc001psn.3 | Silent            | SNP | 37 |
| 7 | UBR4     | uc001bbi.3 | Missense_Mutation | SNP | 37 |
| 7 | PHF21B   | uc003bfn.3 | Missense_Mutation | SNP | 37 |
| 7 | ACACB    | uc001tob.3 | Missense_Mutation | SNP | 37 |
| 7 | OR4S2    | uc001nhs.1 | Silent            | SNP | 37 |
| 7 | SPANXN3  | uc004fbw.3 | Missense_Mutation | SNP | 37 |
| 7 | ICMT     | uc001amk.3 | Silent            | SNP | 37 |
| 7 | OR51A4   | uc010qys.2 | Silent            | SNP | 37 |
| 7 | PLG      | uc003qtm.4 | Missense_Mutation | SNP | 37 |
| 7 | MKRN3    | uc001ywh.4 | Missense_Mutation | SNP | 37 |
| 7 | ABCC4    | uc001vmd.4 | Missense_Mutation | SNP | 37 |
| 7 | AK127963 | uc003zln.1 | Intron            | SNP | 37 |
| 7 | GLT25D2  | uc001gqr.3 | Silent            | SNP | 37 |
| 7 | AP3B2    | uc010uoi.2 | Silent            | SNP | 37 |
| 7 | PARD3    | uc010qej.2 | Missense_Mutation | SNP | 37 |
| 7 | CLSTN2   | uc003etn.3 | Missense_Mutation | SNP | 37 |
| 7 | ITGA8    | uc001ioc.1 | Nonsense_Mutation | SNP | 37 |
| 7 | PCDHAC2  | uc003lic.2 | Missense_Mutation | SNP | 37 |
| 7 | HYDIN    | uc002ezr.3 | Silent            | SNP | 37 |
| 7 | GRIK2    | uc003ppq.4 | Missense_Mutation | SNP | 37 |
| 7 | GRM3     | uc003uid.3 | Splice_Site       | SNP | 37 |
| 7 | ZFP106   | uc001zpw.3 | Missense_Mutation | SNP | 37 |
| 7 | OCRL     | uc004euq.3 | Silent            | SNP | 37 |
| 7 | BCL11A   | uc002sae.1 | Missense_Mutation | SNP | 37 |
| 7 | OVCH1    | uc001rix.1 | Missense_Mutation | SNP | 37 |
| 7 | OR8H3    | uc001nii.1 | Missense_Mutation | SNP | 37 |
| 7 | DST      | uc003pdc.4 | Missense_Mutation | SNP | 37 |
| 7 | FAT2     | uc003lue.4 | Missense_Mutation | SNP | 37 |
| 7 | ZNF737   | uc002npa.3 | Missense_Mutation | SNP | 37 |

|   |          |            |                       |     |    |
|---|----------|------------|-----------------------|-----|----|
| 7 | KIF26B   | uc001ibf.1 | Silent                | SNP | 37 |
| 7 | SEZ6L    | uc003acb.3 | Missense_Mutation     | SNP | 37 |
| 7 | C18orf8  | uc021uie.1 | Silent                | SNP | 37 |
| 7 | TULP2    | uc002pkz.2 | Missense_Mutation     | SNP | 37 |
| 7 | ADAM18   | uc003xni.3 | Missense_Mutation     | SNP | 37 |
| 7 | OR52E8   | uc010qzr.2 | Nonsense_Mutation     | SNP | 37 |
| 7 | ABCA3    | uc002cpy.1 | Silent                | SNP | 37 |
| 7 | ZAN      | uc003uwj.3 | Missense_Mutation     | SNP | 37 |
| 7 | C10orf68 | uc001iwn.4 | Splice_Site           | SNP | 37 |
| 7 | ZNF331   | uc002qbx.1 | Missense_Mutation     | SNP | 37 |
| 7 | SLC2A2   | uc003fhe.1 | Missense_Mutation     | SNP | 37 |
| 7 | MAGEA10  | uc004ffk.3 | Silent                | SNP | 37 |
| 7 | GPR75    | uc002rxo.3 | Missense_Mutation     | SNP | 37 |
| 7 | ADAM29   | uc003iuc.3 | Silent                | SNP | 37 |
| 7 | OR8J3    | uc010riz.2 | Missense_Mutation     | SNP | 37 |
| 7 | ACSM3    | uc010vba.2 | Nonsense_Mutation     | SNP | 37 |
| 7 | TTN      | uc021vsy.1 | Missense_Mutation     | SNP | 37 |
| 7 | SMYD1    | uc002ssr.3 | Missense_Mutation     | SNP | 37 |
| 7 | LRRN2    | uc001hbe.1 | Silent                | SNP | 37 |
| 7 | C1orf173 | uc001dgg.3 | Missense_Mutation     | SNP | 37 |
| 7 | CNTN5    | uc001pga.3 | Missense_Mutation     | SNP | 37 |
| 7 | WDR17    | uc003iuj.3 | Nonsense_Mutation     | SNP | 37 |
| 7 | PAPPA2   | uc001gkz.3 | Missense_Mutation     | SNP | 37 |
| 7 | KIF1A    | uc010fzk.3 | 5'UTR                 | SNP | 37 |
| 7 | ZNF41    | uc004dhs.4 | Missense_Mutation     | SNP | 37 |
| 7 | FRMD7    | uc004ewn.3 | 5'UTR                 | SNP | 37 |
| 7 | CXorf59  | uc004ddk.1 | Nonsense_Mutation     | SNP | 37 |
| 7 | LEPR     | uc001dci.3 | Silent                | SNP | 37 |
| 7 | ACE2     | uc004cxa.1 | Silent                | SNP | 37 |
| 7 | GPR179   | uc002hpz.3 | Missense_Mutation     | SNP | 37 |
| 7 | AMPD3    | uc001min.1 | Silent                | SNP | 37 |
| 7 | RNF168   | uc003fwq.3 | Missense_Mutation     | SNP | 37 |
| 7 | PLOD1    | uc010obb.2 | Missense_Mutation     | SNP | 37 |
| 7 | C12orf51 | uc021reb.1 | Missense_Mutation     | SNP | 37 |
| 7 | abParts  | uc021ser.1 | Non-coding_Transcript | SNP | 37 |
| 7 | KIF17    | uc001bdr.4 | Missense_Mutation     | SNP | 37 |
| 7 | XIRP2    | uc002udx.3 | Missense_Mutation     | SNP | 37 |
| 7 | ALG14    | uc001dra.2 | Missense_Mutation     | SNP | 37 |
| 7 | ORC5     | uc003vcb.3 | Missense_Mutation     | SNP | 37 |
| 7 | CDC27    | uc002ile.4 | 3'UTR                 | SNP | 37 |
| 7 | ZDBF2    | uc002vbp.2 | Missense_Mutation     | SNP | 37 |
| 7 | ZNF423   | uc002efs.3 | Missense_Mutation     | SNP | 37 |
| 7 | ANKRD33  | uc001rzh.4 | 3'UTR                 | SNP | 37 |

|   |          |            |                       |     |    |
|---|----------|------------|-----------------------|-----|----|
| 7 | ABCC1    | uc010bvi.3 | Silent                | SNP | 37 |
| 7 | CABS1    | uc003hff.3 | Missense_Mutation     | SNP | 37 |
| 7 | WIZ      | uc002nbb.4 | Silent                | SNP | 37 |
| 7 | UTRN     | uc003qkt.3 | Missense_Mutation     | SNP | 37 |
| 7 | RBMXL2   | uc001mfc.2 | Missense_Mutation     | SNP | 37 |
| 7 | OFD1     | uc004cvp.4 | Missense_Mutation     | SNP | 37 |
| 7 | MAP4K1   | uc002oix.1 | Missense_Mutation     | SNP | 37 |
| 7 | FAM90A1  | uc001qui.2 | Missense_Mutation     | SNP | 37 |
| 7 | OTOF     | uc002rhk.3 | Missense_Mutation     | SNP | 37 |
| 7 | SLC24A5  | uc001zwe.3 | Silent                | SNP | 37 |
| 7 | TRIM31   | uc003npg.1 | Missense_Mutation     | SNP | 37 |
| 7 | ASTN1    | uc001glc.3 | Missense_Mutation     | SNP | 37 |
| 7 | OASL     | uc001tzj.1 | Missense_Mutation     | SNP | 37 |
| 7 | PLA2G4C  | uc010xzd.2 | Missense_Mutation     | SNP | 37 |
| 7 | MARCH1   | uc003iqs.2 | Silent                | SNP | 37 |
| 7 | HEATR6   | uc002iyk.1 | Silent                | SNP | 37 |
| 7 | GUCY2C   | uc001rcd.3 | Silent                | SNP | 37 |
| 7 | DNAH5    | uc003jfd.2 | Silent                | SNP | 37 |
| 7 | KCNT1    | uc011mdq.2 | Silent                | SNP | 37 |
| 7 | abParts  | uc021ser.1 | Non-coding_Transcript | SNP | 37 |
| 7 | TMSB15A  | uc004eje.3 | 3'UTR                 | SNP | 37 |
| 7 | SLC25A20 | uc003cva.4 | Silent                | SNP | 37 |
| 7 | LCT      | uc002tuu.1 | Silent                | SNP | 37 |
| 7 | UQCRC1   | uc003cub.1 | Missense_Mutation     | SNP | 37 |
| 7 | GPR112   | uc004ezu.1 | Silent                | SNP | 37 |
| 7 | NR1H4    | uc001tht.2 | Missense_Mutation     | SNP | 37 |
| 7 | SCARF2   | uc002zsj.2 | Missense_Mutation     | SNP | 37 |
| 7 | CDH9     | uc003jgs.1 | 3'UTR                 | SNP | 37 |
| 7 | SEC14L4  | uc003aid.2 | Missense_Mutation     | SNP | 37 |
| 7 | AMPD1    | uc001efe.2 | Missense_Mutation     | SNP | 37 |
| 7 | ATP7B    | uc001vfw.2 | Silent                | SNP | 37 |
| 7 | FAM46D   | uc004edl.1 | Missense_Mutation     | SNP | 37 |
| 7 | PRSS1    | uc003wak.2 | Silent                | SNP | 37 |
| 7 | CDK5RAP2 | uc004bkf.3 | Missense_Mutation     | SNP | 37 |
| 7 | PHAX     | uc003kua.2 | Silent                | SNP | 37 |
| 7 | ACTRT2   | uc001ajz.3 | Silent                | SNP | 37 |
| 7 | LAMB4    | uc010ljo.1 | Missense_Mutation     | SNP | 37 |
| 7 | KIAA2022 | uc004eby.3 | Missense_Mutation     | SNP | 37 |
| 7 | NUF2     | uc001gcq.1 | Missense_Mutation     | SNP | 37 |
| 7 | TMPRSS9  | uc010xgx.2 | Silent                | SNP | 37 |
| 7 | ZNF99    | uc021urt.1 | Missense_Mutation     | SNP | 37 |
| 7 | OR5B2    | uc010rkg.2 | Missense_Mutation     | SNP | 37 |
| 7 | ACO1     | uc003zqw.4 | Missense_Mutation     | SNP | 37 |

|   |             |            |                   |     |    |
|---|-------------|------------|-------------------|-----|----|
| 7 | CES4A       | uc002eqv.3 | Nonsense_Mutation | SNP | 37 |
| 7 | LILRB4      | uc010ert.3 | Silent            | SNP | 37 |
| 7 | DCHS2       | uc003inw.2 | Missense_Mutation | SNP | 37 |
| 7 | HMGCLL1     | uc003pcn.3 | Missense_Mutation | SNP | 37 |
| 7 | ERF         | uc002ote.4 | Missense_Mutation | SNP | 37 |
| 7 | DCLRE1B     | uc001eeg.3 | Missense_Mutation | SNP | 37 |
| 7 | CD177       | uc002owi.3 | Silent            | SNP | 37 |
| 7 | LMOD1       | uc021phl.1 | Missense_Mutation | SNP | 37 |
| 7 | TET3        | uc002skb.4 | Missense_Mutation | SNP | 37 |
| 7 | SNORD115-15 | uc001yzq.1 | Intron            | SNP | 37 |
| 7 | ABCA8       | uc002jhq.3 | Missense_Mutation | SNP | 37 |
| 7 | GABRE       | uc004ffi.3 | Intron            | SNP | 37 |
| 7 | WDR72       | uc002acj.2 | Missense_Mutation | SNP | 37 |
| 7 | NLRP8       | uc002qmh.3 | Missense_Mutation | SNP | 37 |
| 7 | LRR1Q1      | uc001tad.3 | Missense_Mutation | SNP | 37 |
| 7 | SPTA1       | uc001fst.1 | Missense_Mutation | SNP | 37 |
| 7 | EPHA7       | uc003poe.3 | Silent            | SNP | 37 |
| 7 | ADAMTSL3    | uc002bjz.4 | Splice_Site       | SNP | 37 |
| 7 | PTPRB       | uc001swc.4 | Missense_Mutation | SNP | 37 |
| 7 | AHDC1       | uc009vsy.3 | Silent            | SNP | 37 |
| 7 | ROBO2       | uc003dpz.3 | Missense_Mutation | SNP | 37 |
| 7 | NTRK3       | uc002bme.2 | Missense_Mutation | SNP | 37 |
| 7 | KANSL1      | uc002ikc.3 | Missense_Mutation | SNP | 37 |
| 7 | SLC25A31    | uc003ifl.3 | Silent            | SNP | 37 |
| 7 | RGS7        | uc001hyv.2 | Missense_Mutation | SNP | 37 |
| 7 | SLC8A3      | uc001xly.3 | Silent            | SNP | 37 |
| 7 | SERPINA6    | uc001ycv.3 | Missense_Mutation | SNP | 37 |
| 7 | TMPRSS15    | uc002ykw.3 | Nonsense_Mutation | SNP | 37 |
| 7 | ACAN        | uc010upo.1 | Silent            | SNP | 37 |
| 7 | CNBD1       | uc003ydy.2 | Missense_Mutation | SNP | 37 |
| 7 | MCMDC2      | uc003xwz.4 | Silent            | SNP | 37 |
| 7 | OR51S1      | uc010qyo.2 | Missense_Mutation | SNP | 37 |
| 7 | PXDNL       | uc003xqu.4 | Silent            | SNP | 37 |
| 7 | TAF4B       | uc002kvt.4 | Missense_Mutation | SNP | 37 |
| 7 | C10orf68    | uc001iwn.4 | Splice_Site       | SNP | 37 |
| 7 | PSPC1       | uc021rgx.1 | Silent            | SNP | 37 |
| 7 | SDK2        | uc010dfm.3 | Missense_Mutation | SNP | 37 |
| 7 | ZFR2        | uc002lyw.2 | Missense_Mutation | SNP | 37 |
| 7 | C8orf59     | uc022awy.1 | Intron            | SNP | 37 |
| 7 | DNAH10      | uc001uft.4 | Missense_Mutation | SNP | 37 |
| 7 | MYO18B      | uc003abz.1 | Silent            | SNP | 37 |
| 7 | ALKBH3      | uc001mxs.2 | Missense_Mutation | SNP | 37 |
| 7 | GPRIN1      | uc003meo.1 | Silent            | SNP | 37 |

|   |          |            |                   |     |    |
|---|----------|------------|-------------------|-----|----|
| 7 | SLC5A1   | uc003amc.3 | Splice_Site       | SNP | 37 |
| 7 | PITPNM2  | uc001uej.1 | Missense_Mutation | SNP | 37 |
| 7 | CABP5    | uc002phu.2 | Missense_Mutation | SNP | 37 |
| 7 | TNFSF15  | uc004bjh.3 | 3'UTR             | SNP | 37 |
| 7 | PLVAP    | uc002ngk.1 | Silent            | SNP | 37 |
| 7 | CCDC88C  | uc010aty.3 | Missense_Mutation | SNP | 37 |
| 7 | SULF2    | uc002xto.3 | Missense_Mutation | SNP | 37 |
| 7 | POU2F2   | uc002osp.3 | Missense_Mutation | SNP | 37 |
| 7 | CR1      | uc001hfx.3 | Missense_Mutation | SNP | 37 |
| 7 | HEPHL1   | uc001pep.2 | Missense_Mutation | SNP | 37 |
| 7 | PCDHAC2  | uc003lia.2 | Missense_Mutation | SNP | 37 |
| 7 | MAP3K13  | uc010hyf.3 | Missense_Mutation | SNP | 37 |
| 7 | MOV10L1  | uc003bjj.3 | Missense_Mutation | SNP | 37 |
| 7 | C15orf48 | uc001zvg.3 | Missense_Mutation | SNP | 37 |
| 7 | OR51S1   | uc010qyo.2 | Missense_Mutation | SNP | 37 |
| 7 | SHQ1     | uc003dpf.3 | 5'UTR             | SNP | 37 |
| 7 | EPB41L3  | uc002kmt.1 | Silent            | SNP | 37 |
| 7 | ASAH1    | uc003wyn.2 | Missense_Mutation | SNP | 37 |
| 7 | UGT2B17  | uc021xov.1 | Missense_Mutation | SNP | 37 |
| 7 | LCP2     | uc010jjo.1 | 3'UTR             | SNP | 37 |
| 7 | HS3ST2   | uc002dli.3 | 3'UTR             | SNP | 37 |
| 7 | CD33     | uc002pwa.2 | Silent            | SNP | 37 |
| 7 | KIAA0195 | uc010wsa.2 | Silent            | SNP | 37 |
| 7 | GPR112   | uc004ezu.1 | Missense_Mutation | SNP | 37 |
| 7 | SMC1B    | uc003bgc.3 | Missense_Mutation | SNP | 37 |
| 7 | DOT1L    | uc002lvb.4 | Missense_Mutation | SNP | 37 |
| 7 | SYNE2    | uc001xgl.3 | Silent            | SNP | 37 |
| 7 | APOBEC3H | uc021wpt.1 | 3'UTR             | SNP | 37 |
| 7 | MCF2L2   | uc003fli.1 | Splice_Site       | SNP | 37 |
| 7 | CSMD1    | uc022aqr.1 | Splice_Site       | SNP | 37 |
| 7 | HYDIN    | uc002ezr.3 | Missense_Mutation | SNP | 37 |
| 7 | PDE10A   | uc003quo.3 | Silent            | SNP | 37 |
| 7 | ATP7A    | uc004ecx.4 | Missense_Mutation | SNP | 37 |
| 7 | GRHL3    | uc021oiw.1 | Missense_Mutation | SNP | 37 |
| 7 | GRK7     | uc011bnd.2 | Silent            | SNP | 37 |
| 7 | MAGEA8   | uc022cgo.1 | Missense_Mutation | SNP | 37 |
| 7 | TXNRD2   | uc021wlj.1 | Missense_Mutation | SNP | 37 |
| 7 | CCR5     | uc003cpo.4 | Missense_Mutation | SNP | 37 |
| 7 | ATP2B3   | uc004fht.1 | Missense_Mutation | SNP | 37 |
| 7 | PTPRH    | uc002qjq.3 | Missense_Mutation | SNP | 37 |
| 7 | JAM2     | uc002ylp.1 | Missense_Mutation | SNP | 37 |
| 7 | CD40     | uc002xrf.1 | 3'UTR             | SNP | 37 |
| 7 | OR5L2    | uc001nhy.1 | Missense_Mutation | SNP | 37 |

|   |         |            |                   |     |    |
|---|---------|------------|-------------------|-----|----|
| 7 | BCOR    | uc004den.4 | Missense_Mutation | SNP | 37 |
| 7 | PIWIL1  | uc001uik.3 | Missense_Mutation | SNP | 37 |
| 7 | CEACAM5 | uc002orl.3 | Silent            | SNP | 37 |
| 7 | ANKRD50 | uc010inw.3 | Missense_Mutation | SNP | 37 |
| 7 | CDC27   | uc002ile.4 | 3'UTR             | SNP | 37 |
| 7 | ZNF81   | uc022bvq.1 | Missense_Mutation | SNP | 37 |
| 7 | ABCC9   | uc001rfh.3 | Missense_Mutation | SNP | 37 |
| 7 | KALRN   | uc003ehg.3 | Missense_Mutation | SNP | 37 |
| 7 | ATXN1   | uc003nbt.3 | Missense_Mutation | SNP | 37 |
| 7 | DNAH8   | uc021yzh.1 | Silent            | SNP | 37 |
| 7 | CCL15   | uc010wcu.2 | Missense_Mutation | SNP | 37 |
| 7 | SCN11A  | uc021wvy.1 | Missense_Mutation | SNP | 37 |
| 7 | GABRA1  | uc010jiw.3 | Missense_Mutation | SNP | 37 |
| 7 | TKTL2   | uc003iqp.4 | Silent            | SNP | 37 |
| 7 | SLC17A6 | uc001mqk.3 | Missense_Mutation | SNP | 37 |
| 7 | MAP2    | uc002vde.1 | Missense_Mutation | SNP | 37 |
| 7 | TLE6    | uc002lwt.2 | Intron            | SNP | 37 |
| 7 | CFH     | uc001gtj.4 | Silent            | SNP | 37 |
| 7 | SLC44A4 | uc010jti.3 | Silent            | SNP | 37 |
| 7 | ARRB2   | uc010vsg.2 | Silent            | SNP | 37 |
| 7 | MARCH1  | uc003iqs.2 | Missense_Mutation | SNP | 37 |
| 7 | OR2D3   | uc010rav.2 | Missense_Mutation | SNP | 37 |
| 7 | OASL    | uc001tzj.1 | 3'UTR             | SNP | 37 |
| 7 | MAFIP   | uc011clu.2 | Intron            | SNP | 37 |
| 7 | RBM47   | uc003gvc.2 | 3'UTR             | SNP | 37 |
| 7 | ZNF551  | uc002qpw.4 | Silent            | SNP | 37 |
| 7 | HUWE1   | uc004dsp.3 | Missense_Mutation | SNP | 37 |
| 7 | DNM1    | uc022bob.1 | 3'UTR             | SNP | 37 |
| 7 | XIRP2   | uc002udx.3 | Missense_Mutation | SNP | 37 |
| 7 | PARP6   | uc002auc.3 | 3'UTR             | SNP | 37 |
| 7 | CDKN2A  | uc010miu.3 | Splice_Site       | SNP | 37 |
| 7 | DCUN1D3 | uc002dhz.3 | Missense_Mutation | SNP | 37 |
| 7 | NRK     | uc004emd.3 | Missense_Mutation | SNP | 37 |
| 7 | TAOK2   | uc010bzm.2 | Missense_Mutation | SNP | 37 |
| 7 | DNAH8   | uc021yzh.1 | Missense_Mutation | SNP | 37 |
| 7 | LYZL6   | uc002hkj.2 | Missense_Mutation | SNP | 37 |
| 8 | HEATR5B | uc002rpp.1 | Frame_Shift_Ins   | INS | 37 |
| 8 | D4S234E | uc011bvz.2 | Frame_Shift_Del   | DEL | 37 |
| 8 | PIEZO1  | uc010vpb.2 | In_Frame_Del      | DEL | 37 |
| 8 | GDF10   | uc001jfb.3 | Missense_Mutation | SNP | 37 |
| 8 | LAMA3   | uc002kuq.3 | Missense_Mutation | SNP | 37 |
| 8 | ANO8    | uc002ngf.2 | Silent            | SNP | 37 |
| 8 | KAT8    | uc002eaz.3 | 5'UTR             | SNP | 37 |



|   |          |            |                   |     |    |
|---|----------|------------|-------------------|-----|----|
| 8 | DNER     | uc002vpv.3 | Silent            | SNP | 37 |
| 8 | NRM      | uc003nrc.3 | Missense_Mutation | SNP | 37 |
| 8 | BNC1     | uc002bjt.1 | Missense_Mutation | SNP | 37 |
| 8 | CXorf30  | uc011mkc.2 | Silent            | SNP | 37 |
| 8 | RALGDS   | uc011mcw.2 | 5'UTR             | SNP | 37 |
| 8 | SEMA5B   | uc003efz.1 | Missense_Mutation | SNP | 37 |
| 8 | FSTL5    | uc003iqh.3 | Splice_Site       | SNP | 37 |
| 8 | AFM      | uc003hhb.3 | Missense_Mutation | SNP | 37 |
| 8 | LRP1B    | uc002tvj.1 | Missense_Mutation | SNP | 37 |
| 8 | CREB1    | uc002vcc.3 | Missense_Mutation | SNP | 37 |
| 8 | SGOL2    | uc002uvw.2 | Missense_Mutation | SNP | 37 |
| 8 | NME9     | uc003esg.3 | Silent            | SNP | 37 |
| 8 | KCNH1    | uc001hib.2 | Silent            | SNP | 37 |
| 8 | TTN      | uc021vsy.1 | Splice_Site       | SNP | 37 |
| 8 | TCP11    | uc003okd.2 | Missense_Mutation | SNP | 37 |
| 8 | NAP1L1   | uc001sxx.2 | Missense_Mutation | SNP | 37 |
| 8 | PDE4DIP  | uc001emh.3 | 3'UTR             | SNP | 37 |
| 8 | PTCHD3   | uc001itu.2 | Missense_Mutation | SNP | 37 |
| 8 | ERAP2    | uc003kmq.3 | Missense_Mutation | SNP | 37 |
| 8 | MGC39584 | uc003izy.3 | 5'Flank           | SNP | 37 |
| 8 | MSL3     | uc004cuy.3 | 5'UTR             | SNP | 37 |
| 8 | AKD1     | uc003ptn.2 | Missense_Mutation | SNP | 37 |
| 8 | ITGB3    | uc002ili.1 | Silent            | SNP | 37 |
| 8 | FBR3     | uc002dzd.4 | Nonsense_Mutation | SNP | 37 |
| 8 | CORIN    | uc003gxm.3 | Silent            | SNP | 37 |
| 8 | CIRH1A   | uc002ews.4 | Missense_Mutation | SNP | 37 |
| 8 | C17orf72 | uc010wpx.2 | 3'UTR             | SNP | 37 |
| 8 | KCNJ3    | uc002tyv.1 | Missense_Mutation | SNP | 37 |
| 8 | NCR2     | uc003oqh.2 | Missense_Mutation | SNP | 37 |
| 8 | TP63     | uc003fry.2 | Silent            | SNP | 37 |
| 8 | TCERG1   | uc003lob.3 | Nonsense_Mutation | SNP | 37 |
| 8 | ARHGDI3  | uc001rcq.1 | Silent            | SNP | 37 |
| 8 | CCDC83   | uc001pbg.1 | Missense_Mutation | SNP | 37 |
| 8 | HEATR4   | uc021rwe.1 | Splice_Site       | SNP | 37 |
| 8 | ZNF574   | uc002osk.4 | Nonsense_Mutation | SNP | 37 |
| 8 | NRAS     | uc009wgu.3 | Missense_Mutation | SNP | 37 |
| 8 | DEPDC1   | uc001dem.4 | Missense_Mutation | SNP | 37 |
| 8 | MT1X     | uc002ejy.3 | Intron            | SNP | 37 |
| 8 | EYS      | uc011dxu.1 | Missense_Mutation | SNP | 37 |
| 8 | SPG20    | uc001uvn.3 | Silent            | SNP | 37 |
| 8 | EPB41L2  | uc003qch.2 | Missense_Mutation | SNP | 37 |
| 8 | SULT1C3  | uc010ywo.2 | Silent            | SNP | 37 |
| 8 | TRPM6    | uc004ajl.1 | Silent            | SNP | 37 |

|   |               |            |                       |     |    |
|---|---------------|------------|-----------------------|-----|----|
| 8 | PDP1          | uc011lgn.2 | Missense_Mutation     | SNP | 37 |
| 8 | KIAA1804      | uc001hvt.4 | Silent                | SNP | 37 |
| 8 | GRIA3         | uc004etq.4 | Missense_Mutation     | SNP | 37 |
| 8 | FLT3LG        | uc010yav.2 | 3'UTR                 | SNP | 37 |
| 8 | CCDC69        | uc003ltq.3 | Missense_Mutation     | SNP | 37 |
| 8 | MFHAS1        | uc003wsj.1 | Missense_Mutation     | SNP | 37 |
| 8 | SLC7A7        | uc001wgr.4 | Silent                | SNP | 37 |
| 8 | EMILIN2       | uc002kln.3 | Missense_Mutation     | SNP | 37 |
| 8 | XKR4          | uc003xsf.3 | Intron                | SNP | 37 |
| 8 | MASP1         | uc003fri.3 | 3'UTR                 | SNP | 37 |
| 8 | ZNF559        | uc002mle.4 | Missense_Mutation     | SNP | 37 |
| 8 | BAGE1         | uc011mgu.1 | Non-coding_Transcript | SNP | 37 |
| 8 | ITGA1         | uc003jou.3 | Splice_Site           | SNP | 37 |
| 8 | ZNF367        | uc004awg.3 | Missense_Mutation     | SNP | 37 |
| 8 | SON           | uc002yse.1 | Missense_Mutation     | SNP | 37 |
| 8 | COL18A1       | uc002zhi.3 | Silent                | SNP | 37 |
| 8 | KCNJ3         | uc002tyv.1 | Missense_Mutation     | SNP | 37 |
| 8 | LRP10         | uc001whd.3 | Missense_Mutation     | SNP | 37 |
| 8 | EYA4          | uc011ecr.2 | Splice_Site           | SNP | 37 |
| 8 | INMT          | uc003tbs.1 | Missense_Mutation     | SNP | 37 |
| 8 | KLK2          | uc010ycl.2 | Missense_Mutation     | SNP | 37 |
| 8 | MLL3          | uc003wla.3 | Missense_Mutation     | SNP | 37 |
| 8 | MDM2          | uc001sui.3 | Missense_Mutation     | SNP | 37 |
| 8 | GAK           | uc003gbm.4 | 3'UTR                 | SNP | 37 |
| 8 | KIAA0226L     | uc010acl.3 | Missense_Mutation     | SNP | 37 |
| 8 | PRDM16        | uc001akf.3 | Missense_Mutation     | SNP | 37 |
| 8 | KIAA1614      | uc001gok.2 | Missense_Mutation     | SNP | 37 |
| 8 | EXT1          | uc003yok.1 | Splice_Site           | SNP | 37 |
| 8 | EPHA6         | uc010how.1 | Silent                | SNP | 37 |
| 8 | FAM170B       | uc001jhj.3 | Silent                | SNP | 37 |
| 8 | NARG2         | uc002agp.3 | Nonsense_Mutation     | SNP | 37 |
| 8 | TIMD4         | uc003lwh.2 | Missense_Mutation     | SNP | 37 |
| 8 | CDH9          | uc003jgs.1 | Missense_Mutation     | SNP | 37 |
| 8 | CDHR1         | uc001kcw.3 | 3'UTR                 | SNP | 37 |
| 8 | FREM2         | uc001uwv.3 | Missense_Mutation     | SNP | 37 |
| 8 | Unknown       |            | IGR                   | SNP | 37 |
| 8 | TRMT12        | uc003yra.4 | Missense_Mutation     | SNP | 37 |
| 8 | RLBP1         | uc002bnl.3 | Silent                | SNP | 37 |
| 8 | STON1-GTF2A1L | uc002rwp.2 | Nonsense_Mutation     | SNP | 37 |
| 8 | UGGT1         | uc002tps.3 | Silent                | SNP | 37 |
| 8 | GRAMD1A       | uc002nxi.1 | Missense_Mutation     | SNP | 37 |
| 8 | TAC3          | uc001smp.3 | Missense_Mutation     | SNP | 37 |
| 8 | CASR          | uc003eew.4 | Silent                | SNP | 37 |

|   |          |            |                       |     |    |
|---|----------|------------|-----------------------|-----|----|
| 8 | PTCHD3   | uc001itu.2 | Silent                | SNP | 37 |
| 8 | RTN2     | uc002pcb.3 | Missense_Mutation     | SNP | 37 |
| 8 | TCEB3    | uc001bho.3 | 5'UTR                 | SNP | 37 |
| 8 | TCHHL1   | uc001ezo.1 | Silent                | SNP | 37 |
| 8 | CCDC67   | uc001pdq.3 | Missense_Mutation     | SNP | 37 |
| 8 | TIMELESS | uc001slf.2 | Missense_Mutation     | SNP | 37 |
| 8 | FABP2    | uc003icw.3 | Missense_Mutation     | SNP | 37 |
| 8 | NKD2     | uc003jbt.1 | Missense_Mutation     | SNP | 37 |
| 8 | INTS1    | uc003skn.2 | Missense_Mutation     | SNP | 37 |
| 8 | KDM4B    | uc010xim.2 | Missense_Mutation     | SNP | 37 |
| 8 | PACS2    | uc001yqu.3 | Missense_Mutation     | SNP | 37 |
| 8 | PPFIA2   | uc001szo.2 | Missense_Mutation     | SNP | 37 |
| 8 | TC2N     | uc001xzu.4 | Missense_Mutation     | SNP | 37 |
| 8 | SPPL2B   | uc002lvu.3 | Nonsense_Mutation     | SNP | 37 |
| 8 | TAS1R2   | uc001bba.1 | Missense_Mutation     | SNP | 37 |
| 8 | ZBTB49   | uc003ghu.3 | Missense_Mutation     | SNP | 37 |
| 8 | RASA3    | uc001vui.3 | Splice_Site           | SNP | 37 |
| 8 | WRN      | uc003xio.4 | 5'UTR                 | SNP | 37 |
| 8 | RBM15    | uc001dzl.1 | Silent                | SNP | 37 |
| 8 | COL6A1   | uc002zhu.1 | Silent                | SNP | 37 |
| 8 | NR4A3    | uc022bky.1 | Silent                | SNP | 37 |
| 8 | SCN7A    | uc002udu.2 | Missense_Mutation     | SNP | 37 |
| 8 | NME6     | uc003cso.3 | Missense_Mutation     | SNP | 37 |
| 8 | POTEF    | uc010fmh.2 | Silent                | SNP | 37 |
| 8 | ZNF99    | uc021urt.1 | 3'UTR                 | SNP | 37 |
| 8 | COL10A1  | uc003pwm.3 | Silent                | SNP | 37 |
| 8 | XPO6     | uc002dpa.1 | Missense_Mutation     | SNP | 37 |
| 8 | MUC16    | uc002mkp.3 | Missense_Mutation     | SNP | 37 |
| 8 | FRMPD1   | uc004aag.1 | Splice_Site           | SNP | 37 |
| 8 | CPXCR1   | uc004efd.4 | Missense_Mutation     | SNP | 37 |
| 8 | TPTE     | uc002yis.1 | Non-coding_Transcript | SNP | 37 |
| 8 | ALDH1L1  | uc003ein.1 | Missense_Mutation     | SNP | 37 |
| 8 | RGS7     | uc001hyu.2 | 3'UTR                 | SNP | 37 |
| 8 | POLRMT   | uc002lpf.1 | Silent                | SNP | 37 |
| 8 | PCDHB14  | uc003ljb.3 | Missense_Mutation     | SNP | 37 |
| 8 | CREBBP   | uc002cvv.3 | Missense_Mutation     | SNP | 37 |
| 8 | TLN1     | uc003zxt.2 | Missense_Mutation     | SNP | 37 |
| 8 | MYBPH    | uc001gzh.1 | Missense_Mutation     | SNP | 37 |
| 8 | IFRD2    | uc003czb.3 | Splice_Site           | SNP | 37 |
| 8 | RBKS     | uc010ymg.2 | Silent                | SNP | 37 |
| 8 | MAP7D2   | uc010nfo.2 | Missense_Mutation     | SNP | 37 |
| 8 | AGPAT9   | uc003how.3 | Missense_Mutation     | SNP | 37 |
| 8 | DLEC1    | uc003chp.1 | Missense_Mutation     | SNP | 37 |

|   |            |             |                       |     |    |
|---|------------|-------------|-----------------------|-----|----|
| 8 | GPHA2      | uc001oca.3  | Missense_Mutation     | SNP | 37 |
| 8 | LOC654342  | uc002sts.4  | Non-coding_Transcript | SNP | 37 |
| 8 | OR6C76     | uc010spm.2  | Nonsense_Mutation     | SNP | 37 |
| 8 | IZUMO2     | uc002prp.1  | Missense_Mutation     | SNP | 37 |
| 8 | NRG1       | uc011lbh.1  | Splice_Site           | SNP | 37 |
| 8 | OR2B3      | uc003nlx.3  | Silent                | SNP | 37 |
| 8 | RREB1      | uc003mxb.3  | Nonsense_Mutation     | SNP | 37 |
| 8 | JAK3       | uc002nhn.4  | 3'UTR                 | SNP | 37 |
| 8 | WDTC1      | uc009vst.2  | 3'UTR                 | SNP | 37 |
| 8 | LMF2       | uc003blp.2  | Missense_Mutation     | SNP | 37 |
| 8 | PRRX1      | uc001ghf.3  | Silent                | SNP | 37 |
| 8 | OR2T2      | uc001iek.1  | Missense_Mutation     | SNP | 37 |
| 8 | MYO3B      | uc002ufy.3  | Silent                | SNP | 37 |
| 8 | PRB2       | uc010shk.1  | Missense_Mutation     | SNP | 37 |
| 8 | RYR1       | uc002oit.3  | Silent                | SNP | 37 |
| 8 | Unknown    |             | IGR                   | SNP | 37 |
| 8 | SYNGAP1    | uc011dri.2  | Silent                | SNP | 37 |
| 8 | AGBL2      | uc001ngg.3  | Silent                | SNP | 37 |
| 8 | ITGAD      | uc010cap.1  | Missense_Mutation     | SNP | 37 |
| 8 | KRT36      | uc002hwt.3  | Missense_Mutation     | SNP | 37 |
| 8 | abParts    | uc010yts.2  | Intron                | SNP | 37 |
| 8 | SLC45A1    | uc001apb.3  | Silent                | SNP | 37 |
| 8 | MYH11      | uc002ddx.3  | Missense_Mutation     | SNP | 37 |
| 8 | GRIA1      | uc011dcy.2  | Splice_Site           | SNP | 37 |
| 8 | GPR55      | uc002vrg.3  | Silent                | SNP | 37 |
| 8 | ERVMER34-1 | uc003g zr.3 | Missense_Mutation     | SNP | 37 |
| 8 | GRIN2C     | uc002jlt.1  | Missense_Mutation     | SNP | 37 |
| 8 | UBAP2      | uc003ztq.1  | Silent                | SNP | 37 |
| 8 | ERCC4      | uc002dce.2  | Missense_Mutation     | SNP | 37 |
| 8 | GPRC6A     | uc003pxj.1  | Missense_Mutation     | SNP | 37 |
| 8 | FREM1      | uc003zlm.3  | Missense_Mutation     | SNP | 37 |
| 8 | TTN        | uc021v sy.1 | Missense_Mutation     | SNP | 37 |
| 8 | STAB2      | uc001tjw.3  | Silent                | SNP | 37 |
| 8 | OR4K14     | uc010tky.2  | Missense_Mutation     | SNP | 37 |
| 8 | EML5       | uc021ryf.1  | Silent                | SNP | 37 |
| 8 | TCP10      | uc003qvv.1  | 5'UTR                 | SNP | 37 |
| 8 | GRIN2A     | uc002czr.4  | Missense_Mutation     | SNP | 37 |
| 8 | MUC20      | uc010hzo.3  | Missense_Mutation     | SNP | 37 |
| 8 | SNTB1      | uc010mdg.3  | Silent                | SNP | 37 |
| 8 | SLCO6A1    | uc003knn.3  | Missense_Mutation     | SNP | 37 |
| 8 | ZNF568     | uc010efg.3  | Missense_Mutation     | SNP | 37 |
| 8 | FSCN2      | uc010wuo.2  | Silent                | SNP | 37 |
| 8 | COL14A1    | uc003yox.3  | Silent                | SNP | 37 |

|   |           |            |                       |     |    |
|---|-----------|------------|-----------------------|-----|----|
| 8 | ZNF469    | uc002fku.2 | Silent                | SNP | 37 |
| 8 | AMMECR1L  | uc002tpl.3 | Silent                | SNP | 37 |
| 8 | LOC407835 | uc003voo.3 | Silent                | SNP | 37 |
| 8 | KIAA1009  | uc010kbp.3 | Missense_Mutation     | SNP | 37 |
| 8 | C21orf59  | uc002yqc.3 | 3'UTR                 | SNP | 37 |
| 8 | HDC       | uc001zxz.3 | Silent                | SNP | 37 |
| 8 | ACBD5     | uc010qdp.2 | 3'UTR                 | SNP | 37 |
| 8 | PDZD3     | uc001pwb.3 | Silent                | SNP | 37 |
| 8 | TMEM217   | uc003onl.3 | Silent                | SNP | 37 |
| 8 | C8orf76   | uc003yqc.2 | Missense_Mutation     | SNP | 37 |
| 8 | TSC2      | uc010uvu.1 | 3'UTR                 | SNP | 37 |
| 8 | REG4      | uc001eig.3 | Silent                | SNP | 37 |
| 8 | CHEK2     | uc003adt.1 | Missense_Mutation     | SNP | 37 |
| 8 | U2SURP    | uc003evh.1 | Missense_Mutation     | SNP | 37 |
| 8 | TMEM120A  | uc003ued.3 | Splice_Site           | SNP | 37 |
| 8 | FGF8      | uc001ktq.2 | Nonsense_Mutation     | SNP | 37 |
| 8 | IL24      | uc001heu.2 | Missense_Mutation     | SNP | 37 |
| 8 | SOX30     | uc003lxb.1 | Missense_Mutation     | SNP | 37 |
| 8 | CLDN7     | uc002gfm.4 | Missense_Mutation     | SNP | 37 |
| 8 | ROPN1     | uc003eha.3 | Silent                | SNP | 37 |
| 8 | ATG3      | uc003dzd.3 | Missense_Mutation     | SNP | 37 |
| 8 | LMTK3     | uc002pjk.3 | 3'UTR                 | SNP | 37 |
| 8 | NEFL      | uc003xee.3 | Missense_Mutation     | SNP | 37 |
| 8 | KIF21B    | uc001gvs.2 | Missense_Mutation     | SNP | 37 |
| 8 | GABRG2    | uc010jic.3 | 5'UTR                 | SNP | 37 |
| 8 | FABP2     | uc003icw.3 | Missense_Mutation     | SNP | 37 |
| 8 | abParts   | uc021ser.1 | Non-coding_Transcript | SNP | 37 |
| 8 | MYO1H     | uc010sxn.1 | Missense_Mutation     | SNP | 37 |
| 8 | TMPRSS11A | uc003hdr.1 | 5'UTR                 | SNP | 37 |
| 8 | CYP4F8    | uc002nbi.3 | Missense_Mutation     | SNP | 37 |
| 8 | TMEM132B  | uc001uhe.1 | Missense_Mutation     | SNP | 37 |
| 8 | SKA3      | uc001unt.3 | Silent                | SNP | 37 |
| 8 | PIK3C2B   | uc001haw.3 | Silent                | SNP | 37 |
| 8 | GLI1      | uc001snx.3 | Missense_Mutation     | SNP | 37 |
| 8 | DGKI      | uc003vtt.3 | Silent                | SNP | 37 |
| 8 | CDH18     | uc003jgd.3 | Missense_Mutation     | SNP | 37 |
| 8 | ESPNL     | uc002vxq.4 | Missense_Mutation     | SNP | 37 |
| 8 | PYGL      | uc001wyu.3 | 3'UTR                 | SNP | 37 |
| 8 | Unknown   |            | IGR                   | SNP | 37 |
| 8 | PLG       | uc003qtm.4 | Missense_Mutation     | SNP | 37 |
| 8 | HRH1      | uc010hdr.3 | Splice_Site           | SNP | 37 |
| 8 | ANK1      | uc003xom.3 | Silent                | SNP | 37 |
| 8 | NEDD4     | uc002adj.3 | Missense_Mutation     | SNP | 37 |

|   |              |            |                       |     |    |
|---|--------------|------------|-----------------------|-----|----|
| 8 | USH2A        | uc001hku.1 | Missense_Mutation     | SNP | 37 |
| 8 | CDH8         | uc002eog.2 | Missense_Mutation     | SNP | 37 |
| 8 | PPME1        | uc009yty.3 | Silent                | SNP | 37 |
| 8 | SEC23IP      | uc001leu.2 | Missense_Mutation     | SNP | 37 |
| 8 | LRP10        | uc001whd.3 | Silent                | SNP | 37 |
| 8 | EPHX2        | uc003xfu.3 | Missense_Mutation     | SNP | 37 |
| 8 | FAM110B      | uc003xtj.1 | Silent                | SNP | 37 |
| 8 | ITGA4        | uc010frj.1 | 5'UTR                 | SNP | 37 |
| 8 | P2RX5        | uc002fwm.2 | 3'UTR                 | SNP | 37 |
| 8 | LMTK3        | uc002pjk.3 | Missense_Mutation     | SNP | 37 |
| 8 | NPC1         | uc002kum.4 | 5'UTR                 | SNP | 37 |
| 8 | ELMO2        | uc010zxr.1 | Silent                | SNP | 37 |
| 8 | KCNT1        | uc011mdq.2 | Missense_Mutation     | SNP | 37 |
| 8 | TBCCD1       | uc003fqg.3 | Silent                | SNP | 37 |
| 8 | LILRB1       | uc002qgm.3 | Silent                | SNP | 37 |
| 8 | HHLA1        | uc011liy.1 | Silent                | SNP | 37 |
| 8 | CEP192       | uc010xac.2 | Missense_Mutation     | SNP | 37 |
| 8 | HNRNPK       | uc004anf.4 | Missense_Mutation     | SNP | 37 |
| 8 | RGL3         | uc002mrq.2 | 3'UTR                 | SNP | 37 |
| 8 | ZNF608       | uc003ktq.1 | Silent                | SNP | 37 |
| 8 | HEATR7B2     | uc003jmj.4 | Silent                | SNP | 37 |
| 8 | LIPA         | uc001kgc.4 | Intron                | SNP | 37 |
| 8 | ZNF473       | uc002prn.3 | Missense_Mutation     | SNP | 37 |
| 8 | ATF7IP2      | uc002czv.3 | Nonsense_Mutation     | SNP | 37 |
| 8 | ARRDC4       | uc010bom.3 | Missense_Mutation     | SNP | 37 |
| 8 | DSP          | uc003mxx.1 | Missense_Mutation     | SNP | 37 |
| 8 | DIRC1        | uc002uqi.1 | 3'UTR                 | SNP | 37 |
| 8 | TMEM131      | uc002syh.4 | Missense_Mutation     | SNP | 37 |
| 8 | ZNF483       | uc004bff.2 | Missense_Mutation     | SNP | 37 |
| 8 | LOC100507410 | uc002jwo.3 | Non-coding_Transcript | SNP | 37 |
| 8 | CDH22        | uc002xrm.2 | Missense_Mutation     | SNP | 37 |
| 8 | DNAH10       | uc001uft.4 | Silent                | SNP | 37 |
| 8 | ZNF548       | uc002qon.3 | Missense_Mutation     | SNP | 37 |
| 8 | FAM160A1     | uc003imj.2 | Missense_Mutation     | SNP | 37 |
| 8 | PCDHGC5      | uc003ljo.2 | Silent                | SNP | 37 |
| 8 | OR2T3        | uc001iel.1 | Silent                | SNP | 37 |
| 8 | PREX2        | uc003xxt.3 | Nonsense_Mutation     | SNP | 37 |
| 8 | NLGN3        | uc004dzd.2 | Missense_Mutation     | SNP | 37 |
| 8 | SELS         | uc021sxu.1 | Missense_Mutation     | SNP | 37 |
| 8 | PRG4         | uc001gru.4 | Missense_Mutation     | SNP | 37 |
| 8 | STAB2        | uc001tjw.3 | Missense_Mutation     | SNP | 37 |
| 8 | OR51B5       | uc001maq.2 | Missense_Mutation     | SNP | 37 |
| 8 | DDX3X        | uc004dfe.3 | Missense_Mutation     | SNP | 37 |

|   |           |            |                       |     |    |
|---|-----------|------------|-----------------------|-----|----|
| 8 | AOC4      | uc002ibw.1 | 3'UTR                 | SNP | 37 |
| 8 | RREB1     | uc003mxb.3 | Silent                | SNP | 37 |
| 8 | ROPN1     | uc003eha.3 | Missense_Mutation     | SNP | 37 |
| 8 | CXorf30   | uc011mkc.2 | Missense_Mutation     | SNP | 37 |
| 8 | KIR2DL2   | uc002qui.2 | Silent                | SNP | 37 |
| 8 | CFHR2     | uc001gtq.1 | Missense_Mutation     | SNP | 37 |
| 8 | EYS       | uc011dxu.1 | Missense_Mutation     | SNP | 37 |
| 8 | MAN2A2    | uc010bnz.2 | Silent                | SNP | 37 |
| 8 | LOC645166 | uc010pbc.1 | Non-coding_Transcript | SNP | 37 |
| 8 | FTSJD2    | uc003ons.3 | Splice_Site           | SNP | 37 |
| 8 | KDR       | uc003has.3 | Missense_Mutation     | SNP | 37 |
| 8 | HTR2C     | uc004epu.1 | Splice_Site           | SNP | 37 |
| 8 | CENPF     | uc001hkm.3 | Nonsense_Mutation     | SNP | 37 |
| 8 | POTEC     | uc010dln.3 | Missense_Mutation     | SNP | 37 |
| 8 | DDO       | uc003puc.3 | Missense_Mutation     | SNP | 37 |
| 8 | PKD1L3    | uc010vmm.2 | Missense_Mutation     | SNP | 37 |
| 8 | GKN1      | uc002sfc.3 | 5'UTR                 | SNP | 37 |
| 8 | HGD       | uc003edw.3 | 3'UTR                 | SNP | 37 |
| 8 | RUNX3     | uc009vrj.3 | Silent                | SNP | 37 |
| 8 | GPHA2     | uc001oca.3 | Silent                | SNP | 37 |
| 8 | FMNL3     | uc001ruv.1 | Missense_Mutation     | SNP | 37 |
| 8 | JA040725  | uc022bqs.1 | Intron                | SNP | 37 |
| 8 | SDR42E1   | uc002fgu.3 | Missense_Mutation     | SNP | 37 |
| 8 | RALGAPA2  | uc002wrz.3 | Missense_Mutation     | SNP | 37 |
| 8 | PTPRD     | uc003zkk.3 | Silent                | SNP | 37 |
| 8 | C3orf15   | uc003ede.4 | Missense_Mutation     | SNP | 37 |
| 8 | GTPBP2    | uc003ovs.3 | Silent                | SNP | 37 |
| 8 | TRHDE     | uc001sxa.3 | Missense_Mutation     | SNP | 37 |
| 8 | MYO1H     | uc010sxn.1 | Missense_Mutation     | SNP | 37 |
| 8 | OR10K1    | uc010pij.2 | Missense_Mutation     | SNP | 37 |
| 8 | VN1R10P   | uc010jqt.3 | 5'UTR                 | SNP | 37 |
| 8 | CLDN7     | uc002gfm.4 | Silent                | SNP | 37 |
| 8 | LPIN1     | uc010yjm.2 | Missense_Mutation     | SNP | 37 |
| 8 | EDAR      | uc010fjn.3 | Missense_Mutation     | SNP | 37 |
| 8 | ZSCAN1    | uc002qrc.1 | Missense_Mutation     | SNP | 37 |
| 8 | ARHGEF19  | uc001ayc.1 | Silent                | SNP | 37 |
| 8 | ZFR2      | uc002lyw.2 | 3'UTR                 | SNP | 37 |
| 8 | MFHAS1    | uc003wsj.1 | Silent                | SNP | 37 |
| 8 | DSEL      | uc002lke.1 | Missense_Mutation     | SNP | 37 |
| 8 | GGT8P     | uc010fho.1 | Non-coding_Transcript | SNP | 37 |
| 8 | OR13J1    | uc011lph.2 | Silent                | SNP | 37 |
| 8 | C7orf72   | uc011kcj.2 | 3'UTR                 | SNP | 37 |
| 8 | ADARB2    | uc009xhq.3 | 5'UTR                 | SNP | 37 |

|   |              |            |                   |     |    |
|---|--------------|------------|-------------------|-----|----|
| 8 | ASTN1        | uc001glc.3 | 3'UTR             | SNP | 37 |
| 8 | STK31        | uc003swv.1 | 3'UTR             | SNP | 37 |
| 8 | CDH6         | uc003jhe.2 | Missense_Mutation | SNP | 37 |
| 8 | LRP1B        | uc002tvj.1 | Missense_Mutation | SNP | 37 |
| 8 | PRDM1        | uc003prd.2 | Silent            | SNP | 37 |
| 8 | LENG8        | uc002qfw.2 | 3'UTR             | SNP | 37 |
| 8 | TDRKH        | uc009wnb.1 | Silent            | SNP | 37 |
| 8 | TLR7         | uc004cvc.3 | Missense_Mutation | SNP | 37 |
| 8 | ABCA13       | uc003toq.2 | Missense_Mutation | SNP | 37 |
| 8 | ZEB2         | uc002tv.3  | 3'UTR             | SNP | 37 |
| 8 | UGT3A1       | uc003jv.2  | Missense_Mutation | SNP | 37 |
| 8 | PEG3         | uc002qnu.2 | 3'UTR             | SNP | 37 |
| 8 | CSMD1        | uc022aqr.1 | 3'UTR             | SNP | 37 |
| 8 | LEPREL1      | uc011bsk.2 | 3'UTR             | SNP | 37 |
| 8 | EGF          | uc003hzy.4 | 5'UTR             | SNP | 37 |
| 8 | KLHL4        | uc004efa.2 | 3'UTR             | SNP | 37 |
| 8 | RAB11FIP1    | uc003xkp.1 | 5'UTR             | SNP | 37 |
| 8 | LOC100240734 | uc010sos.2 | 5'UTR             | SNP | 37 |
| 8 | CCDC74B      | uc010yzw.1 | Silent            | SNP | 37 |
| 8 | RIMBP2       | uc001uil.2 | Missense_Mutation | SNP | 37 |
| 8 | SLC13A1      | uc003vkm.3 | Missense_Mutation | SNP | 37 |
| 8 | RECQL        | uc001rex.3 | Missense_Mutation | SNP | 37 |
| 8 | SMAD9        | uc001uvw.3 | Splice_Site       | SNP | 37 |
| 8 | MUC16        | uc002mkp.3 | Silent            | SNP | 37 |
| 8 | RTTN         | uc002lkp.2 | Missense_Mutation | SNP | 37 |
| 8 | C10orf71     | uc021pqb.1 | Silent            | SNP | 37 |
| 8 | GFRAL        | uc003pcm.1 | Missense_Mutation | SNP | 37 |
| 8 | LAMP3        | uc003flh.4 | 3'UTR             | SNP | 37 |
| 8 | KCNIP3       | uc002sup.3 | 3'UTR             | SNP | 37 |
| 8 | EIF5A2       | uc003fhd.3 | Missense_Mutation | SNP | 37 |
| 8 | X06774       | uc010kxj.1 | Missense_Mutation | SNP | 37 |
| 8 | RFPL3        | uc003amj.3 | Missense_Mutation | SNP | 37 |
| 8 | ZNF638       | uc002shx.3 | Missense_Mutation | SNP | 37 |
| 8 | DLGAP4       | uc002xfj.3 | 5'UTR             | SNP | 37 |
| 8 | C22orf23     | uc021wpl.1 | Splice_Site       | SNP | 37 |
| 8 | FRG1B        | uc010ztl.1 | Intron            | SNP | 37 |
| 8 | ABCA10       | uc010dfa.1 | Missense_Mutation | SNP | 37 |
| 8 | TRBV2        | uc011kro.1 | Intron            | SNP | 37 |
| 8 | FRG1         | uc003izs.3 | Missense_Mutation | SNP | 37 |
| 8 | AEBP1        | uc003tkb.3 | Missense_Mutation | SNP | 37 |
| 8 | LSG1         | uc003fui.3 | 5'UTR             | SNP | 37 |
| 8 | GTF3C2       | uc002rju.1 | Missense_Mutation | SNP | 37 |
| 8 | LHX2         | uc010mwi.1 | 5'UTR             | SNP | 37 |



|   |          |            |                   |     |    |
|---|----------|------------|-------------------|-----|----|
| 8 | MYO3B    | uc002ufy.3 | Silent            | SNP | 37 |
| 8 | XRCC4    | uc003kib.3 | Missense_Mutation | SNP | 37 |
| 8 | SDR9C7   | uc010sqw.2 | Silent            | SNP | 37 |
| 8 | ZNF461   | uc002oem.3 | Silent            | SNP | 37 |
| 8 | UBE2U    | uc001dbn.1 | Missense_Mutation | SNP | 37 |
| 8 | MYOT     | uc011cye.2 | Nonsense_Mutation | SNP | 37 |
| 8 | FGF10    | uc003jog.1 | Silent            | SNP | 37 |
| 8 | CACNA2D3 | uc003dhf.3 | Silent            | SNP | 37 |
| 8 | HSPH1    | uc001utj.3 | 5'UTR             | SNP | 37 |
| 8 | OR10X1   | uc010pin.2 | Missense_Mutation | SNP | 37 |
| 8 | TGM7     | uc001zrf.1 | Missense_Mutation | SNP | 37 |
| 8 | ZNF542   | uc002qmu.4 | 5'UTR             | SNP | 37 |
| 8 | RYR3     | uc001zhi.3 | Missense_Mutation | SNP | 37 |
| 8 | ARHGAP35 | uc010ekv.3 | Missense_Mutation | SNP | 37 |
| 8 | KIAA0430 | uc002ddr.3 | Missense_Mutation | SNP | 37 |
| 8 | MTMR8    | uc011mou.2 | Missense_Mutation | SNP | 37 |
| 8 | CDHR2    | uc021yie.1 | Missense_Mutation | SNP | 37 |
| 8 | VPS13A   | uc004akr.3 | Missense_Mutation | SNP | 37 |
| 8 | PRAMEF4  | uc001aun.2 | Silent            | SNP | 37 |
| 8 | GRB2     | uc002jnx.4 | Missense_Mutation | SNP | 37 |
| 8 | LPHN3    | uc010ihh.3 | Missense_Mutation | SNP | 37 |
| 8 | U2SURP   | uc003evh.1 | Missense_Mutation | SNP | 37 |
| 8 | BC047626 | uc003qmd.4 | 3'UTR             | SNP | 37 |
| 8 | SLITRK2  | uc004fcd.3 | Missense_Mutation | SNP | 37 |
| 8 | MPPED1   | uc011apz.2 | Silent            | SNP | 37 |
| 8 | SPRR2G   | uc009wod.2 | 5'UTR             | SNP | 37 |
| 8 | MCF2     | uc011mwn.1 | Silent            | SNP | 37 |
| 8 | GFM1     | uc003fce.3 | Missense_Mutation | SNP | 37 |
| 8 | FAM69A   | uc001dpg.3 | Nonsense_Mutation | SNP | 37 |
| 8 | GRID2    | uc011cdt.2 | Missense_Mutation | SNP | 37 |
| 8 | PLA2G2E  | uc001bct.1 | 5'UTR             | SNP | 37 |
| 8 | ARHGDI3  | uc001rcq.1 | Missense_Mutation | SNP | 37 |
| 8 | WBP4     | uc001uxt.3 | Silent            | SNP | 37 |
| 8 | EHBP1    | uc002sby.3 | Silent            | SNP | 37 |
| 8 | LMTK3    | uc002pjk.3 | 3'UTR             | SNP | 37 |
| 8 | TCRA     | uc001wbw.2 | Intron            | SNP | 37 |
| 8 | COL1A2   | uc003ung.1 | Splice_Site       | SNP | 37 |
| 8 | CHCHD2   | uc003tsa.3 | 5'UTR             | SNP | 37 |
| 8 | TDRD1    | uc001lbg.1 | Missense_Mutation | SNP | 37 |
| 8 | C8orf34  | uc010lyz.3 | Splice_Site       | SNP | 37 |
| 8 | RUFY4    | uc010fvl.2 | 5'UTR             | SNP | 37 |
| 8 | SP110    | uc002vqg.3 | Silent            | SNP | 37 |
| 8 | SEMG2    | uc010ggz.3 | Missense_Mutation | SNP | 37 |

|   |            |            |                   |     |    |
|---|------------|------------|-------------------|-----|----|
| 8 | GNN        | uc009zuh.2 | Missense_Mutation | SNP | 37 |
| 8 | RASGRF1    | uc002beq.3 | Missense_Mutation | SNP | 37 |
| 8 | DNAH2      | uc002giu.1 | Missense_Mutation | SNP | 37 |
| 8 | GPATCH1    | uc002nug.1 | 5'UTR             | SNP | 37 |
| 8 | AK127963   | uc003zln.1 | Intron            | SNP | 37 |
| 8 | CACNA1F    | uc004dnb.3 | Silent            | SNP | 37 |
| 8 | REN        | uc001haq.2 | Silent            | SNP | 37 |
| 8 | LAMA5      | uc002ycq.3 | Missense_Mutation | SNP | 37 |
| 8 | AX747828   | uc003fwo.1 | Missense_Mutation | SNP | 37 |
| 8 | POPDC2     | uc003ecx.1 | Missense_Mutation | SNP | 37 |
| 8 | COL4A3     | uc002vom.2 | Missense_Mutation | SNP | 37 |
| 8 | C14orf166B | uc001xsx.2 | Intron            | SNP | 37 |
| 8 | AATK       | uc010dia.3 | Silent            | SNP | 37 |
| 8 | VWF        | uc001qnn.1 | Missense_Mutation | SNP | 37 |
| 8 | DACH1      | uc021rkj.1 | Missense_Mutation | SNP | 37 |
| 8 | TPRG1      | uc003frv.2 | Silent            | SNP | 37 |
| 8 | ABHD3      | uc002ktk.2 | 5'UTR             | SNP | 37 |
| 8 | SYCP2L     | uc003mzo.3 | Missense_Mutation | SNP | 37 |
| 8 | FLJ38723   | uc002ajj.1 | Missense_Mutation | SNP | 37 |
| 8 | LILRP2     | uc002qgt.1 | Intron            | SNP | 37 |
| 8 | DMD        | uc004dda.1 | Missense_Mutation | SNP | 37 |
| 8 | PKD1L1     | uc003tny.2 | Missense_Mutation | SNP | 37 |
| 8 | PIKFYVE    | uc002vcz.3 | Missense_Mutation | SNP | 37 |
| 8 | FOXN1      | uc010crm.3 | Missense_Mutation | SNP | 37 |
| 8 | UGT1A1     | uc002vuy.3 | Nonsense_Mutation | SNP | 37 |
| 8 | ACSBG1     | uc002bdh.3 | Missense_Mutation | SNP | 37 |
| 8 | EIF4E      | uc011cea.1 | 5'UTR             | SNP | 37 |
| 8 | BCLAF1     | uc003qgx.1 | Missense_Mutation | SNP | 37 |
| 8 | LRP1B      | uc002tvj.1 | Missense_Mutation | SNP | 37 |
| 8 | DIAPH1     | uc003llb.4 | Missense_Mutation | SNP | 37 |
| 8 | TRA        | uc021rpa.1 | Intron            | SNP | 37 |
| 8 | SPICE1     | uc003eag.4 | Missense_Mutation | SNP | 37 |
| 8 | HECTD2     | uc010qnm.1 | Missense_Mutation | SNP | 37 |
| 8 | MUM1L1     | uc004emg.2 | Missense_Mutation | SNP | 37 |
| 8 | NCOR2      | uc021rga.1 | Missense_Mutation | SNP | 37 |
| 8 | TRIM10     | uc003npo.3 | Missense_Mutation | SNP | 37 |
| 8 | MAN1B1     | uc011mep.2 | Missense_Mutation | SNP | 37 |
| 8 | ATF7IP2    | uc002czu.3 | Missense_Mutation | SNP | 37 |
| 8 | SLC16A4    | uc001dzo.2 | Missense_Mutation | SNP | 37 |
| 8 | SCN10A     | uc003ciq.3 | Missense_Mutation | SNP | 37 |
| 8 | DGKH       | uc001uyl.2 | Silent            | SNP | 37 |
| 8 | BCL9L      | uc001pug.3 | Missense_Mutation | SNP | 37 |
| 8 | CCL25      | uc002mjd.3 | 3'UTR             | SNP | 37 |

|   |           |            |                   |     |    |
|---|-----------|------------|-------------------|-----|----|
| 8 | AK095285  | uc010ikd.2 | 5'Flank           | SNP | 37 |
| 8 | RPP14     | uc010hni.3 | Missense_Mutation | SNP | 37 |
| 8 | NOL10     | uc002raq.2 | Missense_Mutation | SNP | 37 |
| 8 | WIPI1     | uc010dey.3 | Missense_Mutation | SNP | 37 |
| 8 | PREX2     | uc003xxu.1 | Missense_Mutation | SNP | 37 |
| 8 | LAMP3     | uc003flh.4 | 3'UTR             | SNP | 37 |
| 8 | PCDHAC2   | uc003lhf.2 | Missense_Mutation | SNP | 37 |
| 8 | ANO7      | uc002wax.2 | Missense_Mutation | SNP | 37 |
| 8 | CACNA1I   | uc003ayc.3 | Missense_Mutation | SNP | 37 |
| 8 | AK097289  | uc003uzi.1 | Silent            | SNP | 37 |
| 8 | KIAA0895L | uc002ert.3 | Missense_Mutation | SNP | 37 |
| 8 | CACNA1C   | uc009zdu.1 | Silent            | SNP | 37 |
| 8 | OR8I2     | uc010rix.2 | Silent            | SNP | 37 |
| 8 | SLC16A4   | uc001dzo.2 | Missense_Mutation | SNP | 37 |
| 8 | PPM1D     | uc002iyt.2 | Nonsense_Mutation | SNP | 37 |
| 8 | ESPN      | uc001amy.3 | Missense_Mutation | SNP | 37 |
| 8 | DEFB119   | uc002wvu.1 | Missense_Mutation | SNP | 37 |
| 8 | POTEE     | uc002tsn.2 | Silent            | SNP | 37 |
| 8 | SCAP      | uc003crh.1 | Missense_Mutation | SNP | 37 |
| 8 | DNAH10    | uc001uft.4 | Silent            | SNP | 37 |
| 8 | HHLA2     | uc003dwy.4 | Nonsense_Mutation | SNP | 37 |
| 8 | LRP10     | uc001whd.3 | Missense_Mutation | SNP | 37 |
| 8 | NANOG     | uc009zfy.1 | Missense_Mutation | SNP | 37 |
| 8 | SPNS2     | uc002fxx.2 | 3'UTR             | SNP | 37 |
| 8 | PPME1     | uc009yty.3 | Missense_Mutation | SNP | 37 |
| 8 | NPY5R     | uc003iqn.3 | Missense_Mutation | SNP | 37 |
| 8 | ACTN2     | uc001hyf.2 | Silent            | SNP | 37 |
| 8 | NLRP8     | uc002qmh.3 | Silent            | SNP | 37 |
| 8 | EDAR      | uc010fjn.3 | Missense_Mutation | SNP | 37 |
| 8 | HYDIN     | uc002ezr.3 | Missense_Mutation | SNP | 37 |
| 8 | OR2Y1     | uc003mmf.1 | Missense_Mutation | SNP | 37 |
| 8 | SH3GLB1   | uc001dly.3 | Missense_Mutation | SNP | 37 |
| 8 | TRERF1    | uc003ose.2 | Silent            | SNP | 37 |
| 8 | ADCY6     | uc001rsh.4 | Silent            | SNP | 37 |
| 8 | KIAA1737  | uc001xtd.3 | Missense_Mutation | SNP | 37 |
| 8 | RAET1L    | uc011eei.2 | Splice_Site       | SNP | 37 |
| 8 | MRRF      | uc011lyq.2 | 3'UTR             | SNP | 37 |
| 8 | DFNB31    | uc004biz.4 | Silent            | SNP | 37 |
| 8 | FRG1B     | uc010ztl.1 | Missense_Mutation | SNP | 37 |
| 8 | TNFRSF12A | uc002csv.4 | Silent            | SNP | 37 |
| 8 | SACS      | uc001uon.2 | 3'UTR             | SNP | 37 |
| 8 | ABCC13    | uc002yjq.3 | Silent            | SNP | 37 |
| 8 | MARVELD3  | uc002fat.3 | Missense_Mutation | SNP | 37 |

|   |           |            |                       |     |    |
|---|-----------|------------|-----------------------|-----|----|
| 8 | XIST      | uc004ebm.1 | Non-coding_Transcript | SNP | 37 |
| 8 | GRIA2     | uc003ipm.4 | Missense_Mutation     | SNP | 37 |
| 8 | OR11G2    | uc010tlb.2 | Silent                | SNP | 37 |
| 8 | LRP5      | uc001ont.3 | Silent                | SNP | 37 |
| 8 | PANK4     | uc001ajm.1 | Missense_Mutation     | SNP | 37 |
| 8 | KCND2     | uc003vjj.1 | Silent                | SNP | 37 |
| 8 | FMNL3     | uc001ruv.1 | Nonsense_Mutation     | SNP | 37 |
| 8 | EXOC3L2   | uc002pay.1 | Silent                | SNP | 37 |
| 8 | OR56A4    | uc010qzv.2 | Silent                | SNP | 37 |
| 9 | CAPNS1    | uc002odi.1 | In_Frame_Ins          | INS | 37 |
| 9 | AQP12B    | uc010fzj.3 | Missense_Mutation     | SNP | 37 |
| 9 | KCNH7     | uc002uch.2 | Missense_Mutation     | SNP | 37 |
| 9 | PDGFRB    | uc003lro.3 | Missense_Mutation     | SNP | 37 |
| 9 | TRIM37    | uc002iwy.4 | Missense_Mutation     | SNP | 37 |
| 9 | BC112340  | uc010grj.1 | Intron                | SNP | 37 |
| 9 | FBXO9     | uc021zas.1 | Missense_Mutation     | SNP | 37 |
| 9 | ANKRD36   | uc010yva.2 | Missense_Mutation     | SNP | 37 |
| 9 | KRTAP4-11 | uc002hvx.3 | Silent                | SNP | 37 |
| 9 | KCNA3     | uc001dzv.1 | Missense_Mutation     | SNP | 37 |
| 9 | GGT1      | uc003aan.1 | Silent                | SNP | 37 |
| 9 | WASH7P    | uc009vis.3 | Intron                | SNP | 37 |
| 9 | APC       | uc003kpz.4 | Missense_Mutation     | SNP | 37 |
| 9 | MST1P2    | uc010och.2 | Non-coding_Transcript | SNP | 37 |
| 9 | UBR4      | uc001bbi.3 | Missense_Mutation     | SNP | 37 |
| 9 | SLC6A11   | uc003bvz.3 | Missense_Mutation     | SNP | 37 |
| 9 | NKAIN4    | uc002yek.3 | Missense_Mutation     | SNP | 37 |
| 9 | TBCK      | uc010ilv.2 | Silent                | SNP | 37 |
| 9 | ECSIT     | uc002msb.3 | Missense_Mutation     | SNP | 37 |
| 9 | RPTOR     | uc002jyt.1 | Missense_Mutation     | SNP | 37 |
| 9 | MUC20     | uc010hzo.3 | 5'UTR                 | SNP | 37 |
| 9 | CSMD3     | uc003ynu.3 | Missense_Mutation     | SNP | 37 |
| 9 | TTI1      | uc002xhl.3 | Silent                | SNP | 37 |
| 9 | PLEKHA7   | uc010rcu.1 | Missense_Mutation     | SNP | 37 |
| 9 | NCOR1P1   | uc002wvj.4 | 3'UTR                 | SNP | 37 |
| 9 | DSCAM     | uc002yyq.1 | Missense_Mutation     | SNP | 37 |
| 9 | RPTOR     | uc002jyt.1 | Missense_Mutation     | SNP | 37 |
| 9 | UBTF      | uc010czs.3 | Missense_Mutation     | SNP | 37 |
| 9 | MCC       | uc003kql.4 | Missense_Mutation     | SNP | 37 |
| 9 | IPO5      | uc001vne.3 | Missense_Mutation     | SNP | 37 |
| 9 | LUC7L3    | uc002isr.3 | Missense_Mutation     | SNP | 37 |
| 9 | NIP7      | uc002exa.3 | 5'UTR                 | SNP | 37 |
| 9 | KRTAP9-4  | uc002hwi.3 | Missense_Mutation     | SNP | 37 |
| 9 | PRSS3     | uc003ztl.4 | Missense_Mutation     | SNP | 37 |

|    |            |            |                       |     |    |
|----|------------|------------|-----------------------|-----|----|
| 9  | CLIP1      | uc001ucg.2 | Splice_Site           | SNP | 37 |
| 9  | TTI2       | uc003xjl.4 | 5'Flank               | SNP | 37 |
| 9  | PDP1       | uc011lgn.2 | Silent                | SNP | 37 |
| 9  | FLJ43315   | uc003bnz.1 | Non-coding_Transcript | SNP | 37 |
| 9  | TANC1      | uc002uag.3 | Missense_Mutation     | SNP | 37 |
| 9  | SPOCK3     | uc011cjq.1 | Missense_Mutation     | SNP | 37 |
| 9  | SLC5A3     | uc002yto.3 | Missense_Mutation     | SNP | 37 |
| 9  | KRTAP10-6  | uc002zfm.3 | Missense_Mutation     | SNP | 37 |
| 9  | FAM86EP    | uc003ghn.3 | Intron                | SNP | 37 |
| 9  | DDX11L11   | uc010sdi.1 | Missense_Mutation     | SNP | 37 |
| 9  | SLC4A2     | uc022apz.1 | Missense_Mutation     | SNP | 37 |
| 9  | ANKRD36BP2 | uc010fhf.3 | Splice_Site           | SNP | 37 |
| 9  | CAMTA1     | uc001aoi.3 | Missense_Mutation     | SNP | 37 |
| 9  | NMNAT2     | uc001gqc.2 | Missense_Mutation     | SNP | 37 |
| 9  | BC112340   | uc010grj.1 | Intron                | SNP | 37 |
| 9  | SH3TC2     | uc003lpu.3 | Missense_Mutation     | SNP | 37 |
| 9  | FOXP2      | uc003vgz.3 | Silent                | SNP | 37 |
| 10 | DNAH17     | uc010dhp.2 | Missense_Mutation     | SNP | 37 |
| 10 | CREBRF     | uc003mch.3 | Missense_Mutation     | SNP | 37 |
| 10 | EMR2       | uc002mzp.1 | 5'UTR                 | SNP | 37 |
| 10 | BC080605   | uc004aex.3 | Non-coding_Transcript | SNP | 37 |
| 10 | TNFAIP8L1  | uc002max.3 | 3'UTR                 | SNP | 37 |
| 10 | abParts    | uc021ser.1 | Non-coding_Transcript | SNP | 37 |
| 10 | LAG3       | uc001qqt.4 | 5'UTR                 | SNP | 37 |
| 10 | CSNK1A1P1  | uc001zjg.4 | Non-coding_Transcript | SNP | 37 |
| 10 | CROCCP2    | uc001azg.1 | Intron                | SNP | 37 |
| 10 | RNF213     | uc002jyh.2 | Missense_Mutation     | SNP | 37 |
| 10 | BRAF       | uc003vwc.4 | Silent                | SNP | 37 |
| 10 | UBE4B      | uc021ogc.1 | Missense_Mutation     | SNP | 37 |
| 10 | USP7       | uc002czl.2 | Missense_Mutation     | SNP | 37 |
| 10 | C1QB       | uc001bgd.3 | Silent                | SNP | 37 |
| 10 | ANKRD36C   | uc002suz.1 | 5'UTR                 | SNP | 37 |
| 10 | MLL3       | uc003wla.3 | Silent                | SNP | 37 |
| 10 | ANKRD36    | uc010yva.2 | Missense_Mutation     | SNP | 37 |
| 10 | MGC70870   | uc002kgk.4 | Non-coding_Transcript | SNP | 37 |
| 10 | RNF213     | uc002jyh.2 | Missense_Mutation     | SNP | 37 |
| 10 | PGF        | uc001xqz.3 | Missense_Mutation     | SNP | 37 |
| 10 | LOC283788  | uc022brb.1 | Intron                | SNP | 37 |
| 10 | UBE3C      | uc010lqs.3 | Missense_Mutation     | SNP | 37 |
| 10 | AHNAK2     | uc010axc.1 | Missense_Mutation     | SNP | 37 |
| 10 | HSD17B7    | uc001gci.3 | Missense_Mutation     | SNP | 37 |
| 10 | BRAF       | uc003vwc.4 | Missense_Mutation     | SNP | 37 |
| 10 | EMR2       | uc002mzp.1 | 5'UTR                 | SNP | 37 |

|    |           |            |                       |     |    |
|----|-----------|------------|-----------------------|-----|----|
| 10 | BC080605  | uc004aex.3 | Non-coding_Transcript | SNP | 37 |
| 10 | LOC283788 | uc022brb.1 | Intron                | SNP | 37 |
| 10 | BPTF      | uc002jge.3 | Splice_Site           | SNP | 37 |
| 10 | LOC389634 | uc001quk.4 | Silent                | SNP | 37 |
| 10 | SLC25A23  | uc002mex.1 | Missense_Mutation     | SNP | 37 |
| 10 | BC080605  | uc004aex.3 | Non-coding_Transcript | SNP | 37 |
| 10 | TECRL     | uc003hcv.3 | Silent                | SNP | 37 |
| 10 | PCDHB10   | uc003lix.3 | Missense_Mutation     | SNP | 37 |
| 10 | ADRA1A    | uc003xfc.1 | Silent                | SNP | 37 |
| 10 | IRX4      | uc003jcz.2 | Silent                | SNP | 37 |
| 10 | SYT1      | uc001sys.3 | Nonsense_Mutation     | SNP | 37 |
| 10 | C6        | uc003jmk.2 | Missense_Mutation     | SNP | 37 |
| 10 | SLC12A7   | uc003jbu.3 | Nonsense_Mutation     | SNP | 37 |
| 10 | BPTF      | uc002jgf.3 | Silent                | SNP | 37 |
| 10 | IRX4      | uc003jcz.2 | Silent                | SNP | 37 |
| 10 | BRAF      | uc003vwc.4 | Splice_Site           | SNP | 37 |
| 10 | CACNG2    | uc003aps.2 | Splice_Site           | SNP | 37 |
| 10 | BICC1     | uc001jkj.1 | Silent                | SNP | 37 |
| 10 | GH2       | uc002jcl.1 | Missense_Mutation     | SNP | 37 |
| 10 | DUSP15    | uc002wwx.1 | Silent                | SNP | 37 |
| 10 | MYH16     | uc003upw.3 | Splice_Site           | SNP | 37 |
| 10 | BRAF      | uc003vwc.4 | Missense_Mutation     | SNP | 37 |
| 10 | LOC389634 | uc001quk.4 | Missense_Mutation     | SNP | 37 |
| 10 | GIMAP6    | uc022apv.1 | Silent                | SNP | 37 |
| 10 | PTPLA     | uc001iph.1 | Missense_Mutation     | SNP | 37 |
| 10 | RNF213    | uc002jyh.2 | Missense_Mutation     | SNP | 37 |
| 10 | C1QTNF1   | uc002jwr.4 | 5'UTR                 | SNP | 37 |
| 10 | SLC25A23  | uc002mex.1 | Missense_Mutation     | SNP | 37 |
| 10 | LOC283788 | uc022brb.1 | Intron                | SNP | 37 |
| 10 | PAPLN     | uc010ttx.2 | Silent                | SNP | 37 |
| 10 | KIF1B     | uc001aqz.3 | Missense_Mutation     | SNP | 37 |
| 10 | GCFC2     | uc002sno.3 | Missense_Mutation     | SNP | 37 |
| 10 | NBPF10    | uc021ouk.1 | 5'UTR                 | SNP | 37 |
| 10 | BAGE      | uc002yit.1 | 3'UTR                 | SNP | 37 |
| 10 | CRTC2     | uc021pab.1 | Missense_Mutation     | SNP | 37 |
| 10 | RNF213    | uc002jyh.2 | Missense_Mutation     | SNP | 37 |
| 10 | TECRL     | uc003hcv.3 | Silent                | SNP | 37 |
| 10 | COBL      | uc003tps.3 | Silent                | SNP | 37 |
| 10 | CCL1      | uc002hid.1 | 3'UTR                 | SNP | 37 |
| 10 | TRPV6     | uc003wbx.2 | Missense_Mutation     | SNP | 37 |
| 10 | IRF9      | uc001wmq.3 | Silent                | SNP | 37 |
| 10 | SLC12A7   | uc003jbu.3 | Nonsense_Mutation     | SNP | 37 |
| 10 | NUDT8     | uc001omo.2 | Missense_Mutation     | SNP | 37 |



| Chromosome | Start position | End position | Strand | Reference Allele | Tumor Seq Allele1 |
|------------|----------------|--------------|--------|------------------|-------------------|
| 11         | 104874011      | 104874011    | +      | T                | T                 |
| 3          | 151148114      | 151148116    | +      | CAG              | CAG               |
| 14         | 88945628       | 88945630     | +      | TCC              | TCC               |
| 1          | 156815472      | 156815473    | +      | -                | -                 |
| 2          | 3405664        | 3405664      | +      | C                | C                 |
| 12         | 126137067      | 126137067    | +      | G                | G                 |
| 20         | 35293478       | 35293478     | +      | C                | C                 |
| 2          | 196699030      | 196699030    | +      | C                | C                 |
| 4          | 74270854       | 74270854     | +      | G                | G                 |
| 14         | 94083608       | 94083608     | +      | C                | C                 |
| 5          | 137475774      | 137475774    | +      | G                | G                 |
| 7          | 142749891      | 142749891    | +      | C                | C                 |
| 7          | 100679683      | 100679683    | +      | G                | G                 |
| X          | 13061368       | 13061368     | +      | C                | C                 |
| 15         | 55912896       | 55912896     | +      | A                | A                 |
| 12         | 42858718       | 42858718     | +      | C                | C                 |
| 20         | 33519827       | 33519827     | +      | C                | C                 |
| 10         | 38121172       | 38121172     | +      | G                | G                 |
| 14         | 90651141       | 90651141     | +      | C                | C                 |
| 1          | 200971422      | 200971422    | +      | C                | C                 |
| 10         | 63212847       | 63212847     | +      | G                | G                 |
| 1          | 171254559      | 171254559    | +      | G                | G                 |
| 13         | 20412888       | 20412888     | +      | G                | G                 |
| 7          | 100675659      | 100675659    | +      | G                | G                 |
| 5          | 121739528      | 121739528    | +      | G                | G                 |
| 1          | 224190463      | 224190463    | +      | T                | T                 |
| 14         | 106518827      | 106518827    | +      | G                | G                 |
| 16         | 28911948       | 28911948     | +      | G                | G                 |
| 14         | 105609230      | 105609230    | +      | G                | G                 |
| 13         | 19414291       | 19414291     | +      | G                | G                 |
| 20         | 33805805       | 33805805     | +      | G                | G                 |
| 9          | 5163948        | 5163948      | +      | C                | C                 |
| 3          | 33866740       | 33866740     | +      | C                | C                 |
| 2          | 27263235       | 27263235     | +      | C                | C                 |
| 7          | 142448586      | 142448586    | +      | G                | G                 |
| 15         | 45724277       | 45724277     | +      | C                | C                 |
| 22         | 38522223       | 38522223     | +      | T                | T                 |
| 11         | 64517914       | 64517914     | +      | G                | G                 |
| 5          | 167420087      | 167420087    | +      | C                | C                 |
| 12         | 105557980      | 105557980    | +      | G                | G                 |



|    |           |           |   |   |   |
|----|-----------|-----------|---|---|---|
| 3  | 132036400 | 132036400 | + | G | G |
| 6  | 31674724  | 31674724  | + | C | C |
| 3  | 77657068  | 77657068  | + | G | G |
| 7  | 107423751 | 107423751 | + | C | C |
| 22 | 31487386  | 31487386  | + | C | C |
| 19 | 31025844  | 31025844  | + | C | C |
| 14 | 24546556  | 24546556  | + | C | C |
| 17 | 47123308  | 47123308  | + | G | G |
| 6  | 136599615 | 136599615 | + | G | G |
| 4  | 106405924 | 106405924 | + | C | C |
| 1  | 226925103 | 226925103 | + | C | C |
| 3  | 9859359   | 9859359   | + | C | C |
| 8  | 67976711  | 67976711  | + | G | G |
| 6  | 33333333  | 33333333  | + | G | G |
| 13 | 84455040  | 84455040  | + | G | G |
| 6  | 136597594 | 136597594 | + | C | C |
| 14 | 20528267  | 20528267  | + | G | G |
| 2  | 73677777  | 73677777  | + | A | A |
| 11 | 57886113  | 57886113  | + | C | C |
| 6  | 15497210  | 15497210  | + | G | G |
| 8  | 145724191 | 145724191 | + | G | G |
| 10 | 76719730  | 76719730  | + | C | C |
| 22 | 17073153  | 17073153  | + | G | G |
| 1  | 16969288  | 16969288  | + | G | G |
| 6  | 152756922 | 152756922 | + | T | T |
| 8  | 113988306 | 113988306 | + | T | T |
| 22 | 24659809  | 24659809  | + | G | G |
| 22 | 20295430  | 20295430  | + | G | G |
| 3  | 111799803 | 111799803 | + | G | G |
| 16 | 2289913   | 2289913   | + | C | C |
| 19 | 9088052   | 9088052   | + | C | C |
| 1  | 201861058 | 201861058 | + | G | G |
| 19 | 16860664  | 16860664  | + | C | C |
| 8  | 132002643 | 132002643 | + | C | C |
| 13 | 74387203  | 74387203  | + | G | G |
| 3  | 9787315   | 9787315   | + | G | G |
| 3  | 50326238  | 50326238  | + | G | G |
| 15 | 101606905 | 101606905 | + | A | A |
| 21 | 46600299  | 46600299  | + | G | G |
| 3  | 168845816 | 168845816 | + | G | G |
| 6  | 31901430  | 31901430  | + | G | G |
| 7  | 131872304 | 131872304 | + | G | G |
| 5  | 74055243  | 74055243  | + | C | C |

|    |           |           |   |   |   |
|----|-----------|-----------|---|---|---|
| 6  | 31689483  | 31689483  | + | C | C |
| 7  | 158526717 | 158526717 | + | G | G |
| 2  | 32475829  | 32475829  | + | A | A |
| 7  | 140453136 | 140453136 | + | A | A |
| 19 | 56390263  | 56390263  | + | G | G |
| 6  | 11213750  | 11213750  | + | C | C |
| 17 | 43101901  | 43101901  | + | G | G |
| 9  | 112020468 | 112020468 | + | C | C |
| 2  | 196699031 | 196699031 | + | C | C |
| 11 | 58482865  | 58482865  | + | C | C |
| 1  | 207787753 | 207787753 | + | C | C |
| 7  | 82996953  | 82996953  | + | G | G |
| 16 | 57762306  | 57762306  | + | G | G |
| 12 | 91502014  | 91502014  | + | C | C |
| 1  | 200877874 | 200877874 | + | A | A |
| 2  | 90229089  | 90229089  | + | C | C |
| 12 | 666859    | 666859    | + | C | C |
| 7  | 4150297   | 4150297   | + | G | G |
| 19 | 9063594   | 9063594   | + | C | C |
| 1  | 57378166  | 57378166  | + | C | C |
| 12 | 9583264   | 9583264   | + | G | G |
| 12 | 66597532  | 66597532  | + | G | G |
| 2  | 234775593 | 234775593 | + | C | C |
| 2  | 237489755 | 237489755 | + | C | C |
| 15 | 91172626  | 91172626  | + | C | C |
| 22 | 50277963  | 50277963  | + | C | C |
| 3  | 184038321 | 184038321 | + | G | G |
| 12 | 104077005 | 104077005 | + | G | G |
| 8  | 71069001  | 71069001  | + | G | G |
| 22 | 50277964  | 50277964  | + | C | C |
| 8  | 42591687  | 42591687  | + | C | C |
| 9  | 35548224  | 35548224  | + | C | C |
| 4  | 71232436  | 71232436  | + | C | C |
| 15 | 94841809  | 94841809  | + | G | G |
| 2  | 74652087  | 74652087  | + | G | G |
| 1  | 12337561  | 12337561  | + | T | T |
| 6  | 30128329  | 30128329  | + | C | C |
| 15 | 91769779  | 91769779  | + | G | G |
| 2  | 179498763 | 179498763 | + | C | C |
| 22 | 25243611  | 25243611  | + | G | G |
| 12 | 56088643  | 56088643  | + | C | C |
| X  | 12939924  | 12939924  | + | G | G |
| 22 | 24659813  | 24659813  | + | C | C |

|    |           |           |   |   |   |
|----|-----------|-----------|---|---|---|
| 1  | 201861059 | 201861059 | + | G | G |
| 1  | 171544216 | 171544216 | + | T | T |
| 5  | 153390839 | 153390839 | + | G | G |
| 12 | 11506630  | 11506630  | + | C | C |
| 3  | 121345775 | 121345775 | + | G | G |
| 17 | 41019752  | 41019752  | + | G | G |
| 17 | 10426830  | 10426830  | + | G | G |
| 5  | 112175576 | 112175576 | + | C | C |
| 2  | 168726366 | 168726366 | + | C | C |
| 21 | 36252912  | 36252912  | + | G | G |
| 2  | 179600704 | 179600704 | + | C | C |
| 4  | 1803593   | 1803593   | + | G | G |
| 11 | 17793879  | 17793879  | + | G | G |
| 7  | 71177240  | 71177240  | + | G | G |
| 11 | 73102236  | 73102236  | + | C | C |
| 8  | 87162356  | 87162356  | + | C | C |
| 11 | 62931379  | 62931379  | + | G | G |
| 3  | 97887874  | 97887874  | + | G | G |
| 1  | 201190661 | 201190661 | + | G | G |
| 19 | 44159655  | 44159655  | + | G | G |
| 13 | 24895902  | 24895902  | + | C | C |
| 6  | 161491704 | 161491704 | + | C | C |
| 1  | 183895291 | 183895291 | + | G | G |
| 7  | 100815611 | 100815611 | + | G | G |
| 1  | 16969287  | 16969287  | + | G | G |
| 6  | 43322642  | 43322642  | + | C | C |
| X  | 107464479 | 107464479 | + | T | T |
| 3  | 97983971  | 97983971  | + | G | G |
| 12 | 132400953 | 132400953 | + | C | C |
| 19 | 6702576   | 6702576   | + | C | C |
| 4  | 106405923 | 106405923 | + | C | C |
| 9  | 140946607 | 140946607 | + | C | C |
| 16 | 28915512  | 28915512  | + | G | G |
| 14 | 74824770  | 74824770  | + | C | C |
| 19 | 52869863  | 52869863  | + | G | G |
| 17 | 42162540  | 42162540  | + | T | T |
| 11 | 113852011 | 113852011 | + | C | C |
| 19 | 33355559  | 33355559  | + | C | C |
| 6  | 33333342  | 33333342  | + | G | G |
| 19 | 38910572  | 38910572  | + | G | G |
| 22 | 25043184  | 25043184  | + | T | T |
| 6  | 15497209  | 15497209  | + | G | G |
| 4  | 2910281   | 2910281   | + | C | C |

|    |           |           |   |                                       |         |
|----|-----------|-----------|---|---------------------------------------|---------|
| 14 | 90770317  | 90770317  | + | G                                     | G       |
| 17 | 44249321  | 44249321  | + | G                                     | G       |
| 22 | 36702080  | 36702080  | + | C                                     | C       |
| 17 | 8222147   | 8222147   | + | T                                     | T       |
| 5  | 140744896 | 140744896 | + | G                                     | G       |
| 1  | 47610625  | 47610625  | + | G                                     | G       |
| 13 | 95696538  | 95696538  | + | G                                     | G       |
| 11 | 55322305  | 55322305  | + | C                                     | C       |
| 14 | 45623930  | 45623930  | + | G                                     | G       |
| 11 | 118007835 | 118007835 | + | C                                     | C       |
| 1  | 91851370  | 91851389  | + | TTGTCAGATATTTTAAA\TTGTCAGATATTTTAAAT, |         |
| 1  | 94955347  | 94955348  | + | CA                                    | CA      |
| 2  | 102499112 | 102499112 | + | T                                     | T       |
| 2  | 152273140 | 152273140 | + | C                                     | C       |
| 3  | 112358412 | 112358412 | + | G                                     | G       |
| 3  | 193182788 | 193182794 | + | AGAAGAT                               | AGAAGAT |
| 8  | 145066862 | 145066862 | + | C                                     | C       |
| 10 | 93713527  | 93713527  | + | T                                     | T       |
| 17 | 29508455  | 29508480  | + | GCCCTAAAGAAGGTTG\GCCCTAAAGAAGGTTGC    |         |
| 17 | 30815405  | 30815405  | + | C                                     | C       |
| 17 | 48823194  | 48823216  | + | iAAAAGACGAAGGGAA\GAAAAGACGAAGGGAAAG   |         |
| 19 | 10787859  | 10787859  | + | C                                     | C       |
| 19 | 50542514  | 50542514  | + | T                                     | T       |
| 22 | 50921176  | 50921179  | + | CCCC                                  | CCCC    |
| X  | 55650719  | 55650719  | + | G                                     | G       |
| 11 | 7982320   | 7982320   | + | C                                     | C       |
| 8  | 27823962  | 27823962  | + | G                                     | G       |
| 3  | 50229129  | 50229129  | + | C                                     | C       |
| 22 | 22869844  | 22869844  | + | C                                     | C       |
| 6  | 71004055  | 71004055  | + | T                                     | T       |
| 10 | 102249516 | 102249516 | + | G                                     | G       |
| 1  | 214549657 | 214549657 | + | G                                     | G       |
| 3  | 124560307 | 124560307 | + | G                                     | G       |
| 14 | 64749642  | 64749642  | + | G                                     | G       |
| 20 | 54824532  | 54824532  | + | C                                     | C       |
| 16 | 58019120  | 58019120  | + | C                                     | C       |
| 10 | 48413860  | 48413860  | + | G                                     | G       |
| 19 | 18271870  | 18271870  | + | C                                     | C       |
| 1  | 38227362  | 38227362  | + | G                                     | G       |
| 2  | 208866315 | 208866315 | + | C                                     | C       |
| 10 | 27317785  | 27317785  | + | T                                     | T       |
| 12 | 79685838  | 79685838  | + | A                                     | A       |
| 7  | 103363627 | 103363627 | + | G                                     | G       |

|    |           |           |   |   |   |
|----|-----------|-----------|---|---|---|
| 19 | 2222429   | 2222429   | + | C | C |
| 17 | 56271414  | 56271414  | + | G | G |
| 12 | 2789675   | 2789675   | + | C | C |
| 9  | 35957732  | 35957732  | + | C | C |
| 19 | 39847542  | 39847542  | + | C | C |
| 3  | 161221030 | 161221030 | + | G | G |
| 3  | 130162333 | 130162333 | + | G | G |
| 11 | 618736    | 618736    | + | C | C |
| 10 | 113928634 | 113928634 | + | G | G |
| 12 | 10961989  | 10961989  | + | C | C |
| 19 | 16664398  | 16664398  | + | G | G |
| 19 | 6940106   | 6940106   | + | C | C |
| 18 | 30350346  | 30350346  | + | C | C |
| 5  | 5464165   | 5464165   | + | C | C |
| 16 | 2158839   | 2158839   | + | G | G |
| 14 | 20443907  | 20443907  | + | C | C |
| 11 | 55587968  | 55587968  | + | C | C |
| 19 | 57649924  | 57649924  | + | C | C |
| 18 | 45567019  | 45567019  | + | C | C |
| 5  | 75505590  | 75505590  | + | C | C |
| 19 | 54502988  | 54502988  | + | C | C |
| 1  | 53558404  | 53558404  | + | C | C |
| 5  | 58511757  | 58511757  | + | G | G |
| 21 | 42748866  | 42748866  | + | G | G |
| 2  | 201470306 | 201470306 | + | C | C |
| 11 | 93800874  | 93800874  | + | G | G |
| 7  | 92761552  | 92761552  | + | C | C |
| 22 | 24659717  | 24659717  | + | T | T |
| 6  | 35393886  | 35393886  | + | C | C |
| 16 | 9856976   | 9856976   | + | C | C |
| 8  | 43147724  | 43147724  | + | C | C |
| 1  | 12251049  | 12251049  | + | G | G |
| 5  | 31983289  | 31983289  | + | G | G |
| 1  | 86591380  | 86591380  | + | G | G |
| 17 | 7400171   | 7400171   | + | C | C |
| 16 | 72107826  | 72107826  | + | G | G |
| 2  | 29294547  | 29294547  | + | C | C |
| 10 | 108536427 | 108536427 | + | C | C |
| 7  | 100682954 | 100682954 | + | T | T |
| 8  | 146029396 | 146029396 | + | G | G |
| 19 | 43430749  | 43430749  | + | C | C |
| 22 | 41721763  | 41721763  | + | G | G |
| 12 | 57581219  | 57581219  | + | C | C |

|    |           |           |   |   |   |
|----|-----------|-----------|---|---|---|
| 5  | 137354783 | 137354783 | + | G | G |
| 5  | 36049045  | 36049045  | + | G | G |
| 3  | 46008816  | 46008816  | + | G | G |
| 1  | 247588651 | 247588651 | + | G | G |
| 15 | 40916765  | 40916765  | + | G | G |
| 16 | 2168201   | 2168201   | + | G | G |
| 11 | 89867846  | 89867846  | + | C | C |
| X  | 79279609  | 79279609  | + | G | G |
| 11 | 7693687   | 7693687   | + | G | G |
| 3  | 129155916 | 129155916 | + | G | G |
| 19 | 9064253   | 9064253   | + | G | G |
| 2  | 74432999  | 74432999  | + | G | G |
| 14 | 24655642  | 24655642  | + | G | G |
| 10 | 69672395  | 69672395  | + | T | T |
| 7  | 150815706 | 150815706 | + | T | T |
| 10 | 61831633  | 61831633  | + | C | C |
| 19 | 11507945  | 11507945  | + | G | G |
| 15 | 34295349  | 34295349  | + | G | G |
| 10 | 62149226  | 62149226  | + | T | T |
| 11 | 1643093   | 1643093   | + | G | G |
| 12 | 120966936 | 120966936 | + | G | G |
| 3  | 121340621 | 121340621 | + | C | C |
| 14 | 57092170  | 57092170  | + | G | G |
| 1  | 119957936 | 119957936 | + | T | T |
| 10 | 105350099 | 105350099 | + | G | G |
| 10 | 105048136 | 105048136 | + | G | G |
| 11 | 17538974  | 17538974  | + | C | C |
| 19 | 9086130   | 9086130   | + | G | G |
| 1  | 161019297 | 161019297 | + | C | C |
| 8  | 103662263 | 103662263 | + | C | C |
| 5  | 16067763  | 16067763  | + | C | C |
| 2  | 238234251 | 238234251 | + | C | C |
| 17 | 79512807  | 79512807  | + | G | G |
| 9  | 79323775  | 79323775  | + | C | C |
| 14 | 94394872  | 94394872  | + | C | C |
| 16 | 24960780  | 24960780  | + | G | G |
| 8  | 86352072  | 86352072  | + | G | G |
| 15 | 49776555  | 49776555  | + | C | C |
| 2  | 131976323 | 131976323 | + | G | G |
| 13 | 21549304  | 21549304  | + | G | G |
| 2  | 207173984 | 207173984 | + | T | T |
| 8  | 11412918  | 11412918  | + | G | G |
| 11 | 9610217   | 9610217   | + | A | A |

|    |           |           |   |   |   |
|----|-----------|-----------|---|---|---|
| 14 | 33292795  | 33292795  | + | G | G |
| 14 | 106236041 | 106236041 | + | T | T |
| 14 | 106174414 | 106174414 | + | G | G |
| 2  | 165947706 | 165947706 | + | G | G |
| 3  | 138724837 | 138724837 | + | G | G |
| 10 | 114575175 | 114575175 | + | C | C |
| 1  | 66075953  | 66075953  | + | G | G |
| 2  | 150305581 | 150305581 | + | G | G |
| 2  | 234545461 | 234545461 | + | G | G |
| 1  | 54607009  | 54607009  | + | G | G |
| 3  | 52729566  | 52729566  | + | C | C |
| 13 | 70314618  | 70314618  | + | C | C |
| 6  | 26217580  | 26217580  | + | G | G |
| 13 | 92003232  | 92003232  | + | C | C |
| 2  | 141215150 | 141215150 | + | C | C |
| 15 | 84287038  | 84287038  | + | A | A |
| 5  | 140559298 | 140559298 | + | C | C |
| 4  | 48993540  | 48993540  | + | C | C |
| 20 | 29628290  | 29628290  | + | G | G |
| 1  | 27056277  | 27056277  | + | C | C |
| 3  | 13381424  | 13381424  | + | C | C |
| X  | 73961369  | 73961369  | + | G | G |
| 3  | 140406929 | 140406929 | + | C | C |
| 14 | 99641119  | 99641119  | + | G | G |
| 2  | 168105435 | 168105435 | + | G | G |
| 22 | 40819629  | 40819629  | + | G | G |
| 11 | 125325548 | 125325548 | + | T | T |
| 7  | 157903587 | 157903587 | + | C | C |
| 7  | 63538338  | 63538338  | + | G | G |
| 14 | 106877797 | 106877797 | + | C | C |
| 2  | 120634900 | 120634900 | + | G | G |
| 10 | 123298225 | 123298225 | + | C | C |
| 19 | 10335000  | 10335000  | + | C | C |
| 19 | 41515907  | 41515907  | + | C | C |
| 10 | 48428848  | 48428848  | + | C | C |
| 14 | 95909598  | 95909598  | + | C | C |
| 4  | 189068387 | 189068387 | + | G | G |
| 18 | 29450955  | 29450955  | + | G | G |
| 18 | 14754897  | 14754897  | + | G | G |
| 11 | 84865671  | 84865671  | + | C | C |
| 1  | 247486515 | 247486515 | + | G | G |
| 16 | 31429675  | 31429675  | + | G | G |
| 22 | 42341288  | 42341288  | + | G | G |

|    |           |           |   |   |   |
|----|-----------|-----------|---|---|---|
| 1  | 169483451 | 169483451 | + | G | G |
| 5  | 79030844  | 79030844  | + | G | G |
| 20 | 1456749   | 1456749   | + | G | G |
| 1  | 158815425 | 158815425 | + | C | C |
| 2  | 179426377 | 179426377 | + | G | G |
| 1  | 184772794 | 184772794 | + | C | C |
| 8  | 103664499 | 103664499 | + | C | C |
| 9  | 74587852  | 74587852  | + | G | G |
| 17 | 73738772  | 73738772  | + | C | C |
| 12 | 21918756  | 21918756  | + | C | C |
| 17 | 18022429  | 18022429  | + | C | C |
| 5  | 160886767 | 160886767 | + | C | C |
| 12 | 53453843  | 53453843  | + | T | T |
| 2  | 33745692  | 33745692  | + | G | G |
| 19 | 54800025  | 54800025  | + | G | G |
| 17 | 27284367  | 27284367  | + | G | G |
| 8  | 144940441 | 144940441 | + | C | C |
| 15 | 32929616  | 32929616  | + | C | C |
| 8  | 77763144  | 77763144  | + | A | A |
| 9  | 132404190 | 132404190 | + | G | G |
| 5  | 156589853 | 156589853 | + | T | T |
| 12 | 55248905  | 55248905  | + | C | C |
| 5  | 98212144  | 98212144  | + | G | G |
| 2  | 231041418 | 231041418 | + | G | G |
| 22 | 50715272  | 50715272  | + | C | C |
| 8  | 130774900 | 130774900 | + | C | C |
| 5  | 140536531 | 140536531 | + | G | G |
| 21 | 39870426  | 39870426  | + | G | G |
| 9  | 14812861  | 14812861  | + | G | G |
| 12 | 40013269  | 40013269  | + | C | C |
| 2  | 162821590 | 162821590 | + | G | G |
| 11 | 4567067   | 4567067   | + | C | C |
| 2  | 179441292 | 179441292 | + | C | C |
| 11 | 7335002   | 7335002   | + | C | C |
| 9  | 27202914  | 27202914  | + | C | C |
| 16 | 84256623  | 84256623  | + | C | C |
| 19 | 17692141  | 17692141  | + | G | G |
| 10 | 72610913  | 72610913  | + | G | G |
| 14 | 74376108  | 74376108  | + | C | C |
| 2  | 29226416  | 29226416  | + | G | G |
| 6  | 139210162 | 139210162 | + | C | C |
| 7  | 128455843 | 128455843 | + | C | C |
| 19 | 53885465  | 53885465  | + | C | C |



|    |           |           |   |   |   |
|----|-----------|-----------|---|---|---|
| 10 | 124330445 | 124330445 | + | T | T |
| 1  | 50659567  | 50659567  | + | G | G |
| 15 | 56386859  | 56386859  | + | G | G |
| 6  | 2770556   | 2770556   | + | C | C |
| 12 | 56500860  | 56500860  | + | G | G |
| 14 | 36840940  | 36840940  | + | C | C |
| 9  | 138714404 | 138714404 | + | G | G |
| 4  | 123269830 | 123269830 | + | T | T |
| 9  | 77339430  | 77339430  | + | G | G |
| 19 | 57640441  | 57640441  | + | C | C |
| 2  | 99013839  | 99013839  | + | C | C |
| 1  | 27056276  | 27056276  | + | C | C |
| 8  | 8185660   | 8185660   | + | C | C |
| 10 | 104123510 | 104123510 | + | C | C |
| 18 | 44549200  | 44549200  | + | G | G |
| 11 | 64037539  | 64037539  | + | G | G |
| 1  | 75038483  | 75038483  | + | C | C |
| 22 | 38109227  | 38109227  | + | C | C |
| 16 | 2808525   | 2808525   | + | G | G |
| 7  | 93055644  | 93055644  | + | C | C |
| 11 | 75115159  | 75115159  | + | C | C |
| 2  | 179426378 | 179426378 | + | G | G |
| 22 | 42486835  | 42486835  | + | G | G |
| 1  | 74507446  | 74507446  | + | G | G |
| 14 | 36841013  | 36841013  | + | C | C |
| X  | 48326283  | 48326283  | + | C | C |
| 3  | 183823915 | 183823915 | + | G | G |
| 15 | 54919039  | 54919039  | + | G | G |
| 7  | 117242909 | 117242909 | + | C | C |
| 10 | 44866825  | 44866825  | + | G | G |
| 12 | 13906792  | 13906792  | + | T | T |
| X  | 151909283 | 151909283 | + | G | G |
| 19 | 10747352  | 10747352  | + | C | C |
| 18 | 51013302  | 51013302  | + | G | G |
| 7  | 2962271   | 2962271   | + | C | C |
| 11 | 65113820  | 65113820  | + | C | C |
| 18 | 76886316  | 76886316  | + | G | G |
| 12 | 21665283  | 21665283  | + | C | C |
| 1  | 168073915 | 168073915 | + | G | G |
| 19 | 651796    | 651796    | + | G | G |
| 15 | 94882563  | 94882563  | + | C | C |
| 12 | 56089410  | 56089410  | + | C | C |
| 12 | 122691290 | 122691290 | + | C | C |

|    |           |           |   |   |   |
|----|-----------|-----------|---|---|---|
| 19 | 758017    | 758017    | + | G | G |
| 2  | 103130633 | 103130633 | + | G | G |
| 5  | 45396704  | 45396704  | + | T | T |
| 10 | 101829575 | 101829575 | + | C | C |
| 19 | 6495364   | 6495364   | + | G | G |
| 17 | 2604106   | 2604106   | + | G | G |
| 3  | 124369714 | 124369714 | + | G | G |
| 14 | 74967685  | 74967685  | + | G | G |
| 1  | 153277455 | 153277455 | + | G | G |
| 8  | 2820882   | 2820882   | + | C | C |
| 14 | 20482553  | 20482553  | + | G | G |
| 17 | 72613293  | 72613293  | + | C | C |
| 7  | 142650947 | 142650947 | + | C | C |
| 19 | 57967671  | 57967671  | + | C | C |
| 14 | 80130286  | 80130286  | + | C | C |
| 11 | 5373136   | 5373136   | + | C | C |
| 17 | 73945355  | 73945355  | + | A | A |
| 6  | 39824103  | 39824103  | + | C | C |
| 5  | 140769664 | 140769664 | + | C | C |
| 19 | 15272483  | 15272483  | + | C | C |
| 14 | 20019992  | 20019992  | + | T | T |
| 19 | 36592672  | 36592672  | + | C | C |
| 19 | 42930956  | 42930956  | + | C | C |
| 2  | 141291668 | 141291668 | + | G | G |
| 2  | 238285895 | 238285895 | + | C | C |
| 11 | 36614608  | 36614608  | + | C | C |
| 1  | 119474438 | 119474438 | + | C | C |
| 14 | 106134525 | 106134525 | + | A | A |
| 6  | 88854825  | 88854825  | + | G | G |
| 2  | 96803397  | 96803397  | + | G | G |
| 14 | 106579283 | 106579283 | + | G | G |
| 17 | 37901746  | 37901746  | + | C | C |
| 12 | 52886486  | 52886486  | + | C | C |
| 2  | 29226515  | 29226515  | + | G | G |
| 3  | 121712606 | 121712606 | + | G | G |
| 9  | 71152272  | 71152272  | + | G | G |
| 10 | 1779424   | 1779424   | + | C | C |
| 3  | 108812333 | 108812333 | + | C | C |
| 17 | 10446421  | 10446421  | + | C | C |
| X  | 56295829  | 56295829  | + | C | C |
| 11 | 106810605 | 106810605 | + | G | G |
| 3  | 122215405 | 122215405 | + | G | G |
| 1  | 47571855  | 47571855  | + | C | C |

|    |           |           |   |   |   |
|----|-----------|-----------|---|---|---|
| 10 | 55949125  | 55949125  | + | G | G |
| 14 | 20822993  | 20822993  | + | G | G |
| 8  | 70744633  | 70744633  | + | G | G |
| 20 | 39991632  | 39991632  | + | G | G |
| 10 | 48370749  | 48370749  | + | G | G |
| 3  | 13612188  | 13612188  | + | C | C |
| 16 | 46963052  | 46963052  | + | C | C |
| 2  | 227954643 | 227954643 | + | G | G |
| 12 | 58176969  | 58176969  | + | C | C |
| X  | 41469205  | 41469205  | + | A | A |
| 6  | 80982887  | 80982887  | + | C | C |
| 11 | 7960642   | 7960642   | + | C | C |
| 5  | 178139333 | 178139333 | + | G | G |
| 11 | 44957159  | 44957159  | + | C | C |
| 17 | 62045537  | 62045537  | + | C | C |
| 14 | 96937879  | 96937879  | + | G | G |
| 19 | 4294628   | 4294628   | + | G | G |
| 19 | 21300350  | 21300350  | + | A | A |
| 9  | 71627855  | 71627855  | + | G | G |
| 15 | 98984385  | 98984385  | + | G | G |
| 21 | 45535753  | 45535753  | + | C | C |
| 1  | 115537767 | 115537767 | + | T | T |
| 2  | 96934384  | 96934384  | + | G | G |
| 8  | 131179824 | 131179824 | + | G | G |
| 8  | 104664873 | 104664873 | + | C | C |
| 1  | 57399055  | 57399055  | + | G | G |
| 5  | 175581965 | 175581965 | + | G | G |
| 8  | 43173623  | 43173623  | + | G | G |
| 12 | 70732324  | 70732324  | + | G | G |
| 20 | 24646073  | 24646073  | + | G | G |
| 14 | 102550295 | 102550295 | + | C | C |
| 6  | 158504463 | 158504463 | + | G | G |
| X  | 134030996 | 134030996 | + | G | G |
| 1  | 42048273  | 42048273  | + | G | G |
| 10 | 82040472  | 82040472  | + | C | C |
| 10 | 52595990  | 52595990  | + | C | C |
| 6  | 37622290  | 37622290  | + | C | C |
| 3  | 140178551 | 140178551 | + | G | G |
| 9  | 114304877 | 114304877 | + | C | C |
| 11 | 58190698  | 58190698  | + | G | G |
| 6  | 71004056  | 71004056  | + | C | C |
| 19 | 48893838  | 48893838  | + | C | C |
| 17 | 18154744  | 18154744  | + | G | G |

|    |           |           |   |   |   |
|----|-----------|-----------|---|---|---|
| 16 | 75204220  | 75204220  | + | G | G |
| 7  | 82584248  | 82584248  | + | A | A |
| X  | 152482330 | 152482330 | + | C | C |
| 11 | 64569666  | 64569666  | + | G | G |
| 19 | 38850181  | 38850181  | + | C | C |
| X  | 118230487 | 118230487 | + | G | G |
| 11 | 65792818  | 65792818  | + | G | G |
| 1  | 65339094  | 65339094  | + | G | G |
| 8  | 22104762  | 22104762  | + | G | G |
| 11 | 65124564  | 65124564  | + | C | C |
| 5  | 42718684  | 42718684  | + | G | G |
| 5  | 90077292  | 90077292  | + | A | A |
| 3  | 19479776  | 19479776  | + | C | C |
| 2  | 220099011 | 220099011 | + | G | G |
| 19 | 36255961  | 36255961  | + | C | C |
| 12 | 2904254   | 2904254   | + | G | G |
| 19 | 18004615  | 18004615  | + | G | G |
| 19 | 39688849  | 39688849  | + | C | C |
| 11 | 48145211  | 48145211  | + | G | G |
| 21 | 47537360  | 47537360  | + | G | G |
| 9  | 140943767 | 140943767 | + | C | C |
| 18 | 54398771  | 54398771  | + | C | C |
| 3  | 180372696 | 180372696 | + | C | C |
| 12 | 9020587   | 9020587   | + | T | T |
| 1  | 156814617 | 156814617 | + | G | G |
| 1  | 192127834 | 192127834 | + | A | A |
| 9  | 125424052 | 125424052 | + | C | C |
| 1  | 115524020 | 115524020 | + | C | C |
| 3  | 139173579 | 139173579 | + | G | G |
| 2  | 905822    | 905822    | + | C | C |
| 3  | 111886122 | 111886122 | + | T | T |
| 9  | 128322025 | 128322025 | + | G | G |
| 14 | 90485751  | 90485751  | + | C | C |
| 12 | 57569455  | 57569455  | + | C | C |
| 3  | 68802140  | 68802140  | + | C | C |
| 7  | 36366282  | 36366282  | + | C | C |
| 3  | 157098987 | 157098987 | + | A | A |
| 6  | 154481010 | 154481010 | + | C | C |
| 20 | 3128986   | 3128986   | + | A | A |
| 17 | 36876988  | 36876988  | + | C | C |
| 7  | 23826460  | 23826460  | + | G | G |
| 7  | 45699747  | 45699747  | + | G | G |
| 19 | 9076411   | 9076411   | + | G | G |

|    |           |           |   |   |   |
|----|-----------|-----------|---|---|---|
| 19 | 41386469  | 41386469  | + | C | C |
| 10 | 96267043  | 96267043  | + | C | C |
| 17 | 31416007  | 31416007  | + | C | C |
| 19 | 19766260  | 19766260  | + | T | T |
| 11 | 9431484   | 9431484   | + | T | T |
| X  | 54985335  | 54985335  | + | G | G |
| 3  | 120408581 | 120408581 | + | A | A |
| 15 | 75562507  | 75562507  | + | C | C |
| 1  | 119427834 | 119427834 | + | G | G |
| 5  | 172341895 | 172341895 | + | C | C |
| 7  | 142655502 | 142655502 | + | G | G |
| 19 | 22363550  | 22363550  | + | G | G |
| 2  | 230902211 | 230902211 | + | G | G |
| 7  | 43447290  | 43447290  | + | A | A |
| 9  | 101911636 | 101911636 | + | G | G |
| 15 | 48500244  | 48500244  | + | C | C |
| 21 | 19704461  | 19704461  | + | C | C |
| 7  | 103198432 | 103198432 | + | G | G |
| 10 | 105812888 | 105812888 | + | G | G |
| 17 | 7577538   | 7577538   | + | C | C |
| 2  | 69553149  | 69553149  | + | G | G |
| 1  | 43803514  | 43803514  | + | G | G |
| 9  | 91661792  | 91661792  | + | C | C |
| 16 | 2290126   | 2290126   | + | T | T |
| 12 | 104377142 | 104377142 | + | C | C |
| 5  | 41181509  | 41181509  | + | G | G |
| 1  | 43909435  | 43909435  | + | G | G |
| 16 | 21823650  | 21823650  | + | G | G |
| 15 | 59500078  | 59500078  | + | G | G |
| 10 | 55582574  | 55582574  | + | C | C |
| 8  | 106814722 | 106814722 | + | G | G |
| 7  | 82435053  | 82435053  | + | C | C |
| 12 | 69250409  | 69250409  | + | C | C |
| 4  | 40778120  | 40778120  | + | G | G |
| 8  | 133925342 | 133925342 | + | C | C |
| 16 | 30794095  | 30794095  | + | G | G |
| X  | 107431219 | 107431219 | + | T | T |
| X  | 99956584  | 99956584  | + | A | A |
| 6  | 116289807 | 116289807 | + | C | C |
| 19 | 11529355  | 11529355  | + | C | C |
| 16 | 75512960  | 75512960  | + | G | G |
| 8  | 92982930  | 92982930  | + | C | C |
| 19 | 40739664  | 40739664  | + | G | G |

|    |           |           |   |   |   |
|----|-----------|-----------|---|---|---|
| 7  | 117003465 | 117003465 | + | A | A |
| 3  | 64617565  | 64617565  | + | G | G |
| 15 | 35084421  | 35084421  | + | C | C |
| 10 | 24508713  | 24508713  | + | G | G |
| 14 | 22592155  | 22592155  | + | C | C |
| 12 | 120966937 | 120966937 | + | G | G |
| 1  | 99771656  | 99771656  | + | C | C |
| 3  | 48459892  | 48459892  | + | G | G |
| 5  | 140481965 | 140481965 | + | C | C |
| 7  | 72419401  | 72419401  | + | C | C |
| 15 | 78475077  | 78475077  | + | A | A |
| 14 | 20822994  | 20822994  | + | G | G |
| 12 | 78225370  | 78225370  | + | A | A |
| 2  | 96078755  | 96078755  | + | C | C |
| 14 | 19553776  | 19553776  | + | G | G |
| 19 | 4544512   | 4544512   | + | G | G |
| 11 | 111614222 | 111614222 | + | G | G |
| 13 | 25049660  | 25049660  | + | G | G |
| 20 | 42232504  | 42232504  | + | A | A |
| 5  | 140249951 | 140249951 | + | A | A |
| 10 | 26482151  | 26482151  | + | G | G |
| 22 | 50217716  | 50217716  | + | G | G |
| 2  | 197187214 | 197187214 | + | C | C |
| 16 | 81134630  | 81134630  | + | G | G |
| 3  | 189706747 | 189706747 | + | C | C |
| 7  | 136912804 | 136912804 | + | T | T |
| 2  | 200136951 | 200136951 | + | C | C |
| X  | 37300901  | 37300901  | + | C | C |
| 7  | 139655320 | 139655320 | + | C | C |
| 19 | 56329477  | 56329477  | + | C | C |
| 11 | 31648737  | 31648737  | + | C | C |
| 17 | 72346643  | 72346643  | + | C | C |
| 1  | 236761218 | 236761218 | + | A | A |
| 17 | 7834053   | 7834053   | + | C | C |
| 3  | 136240178 | 136240178 | + | G | G |
| 12 | 53552155  | 53552155  | + | A | A |
| 6  | 153310945 | 153310945 | + | T | T |
| 22 | 29454813  | 29454813  | + | C | C |
| 10 | 99359926  | 99359926  | + | C | C |
| 1  | 202284005 | 202284005 | + | C | C |
| 5  | 35774065  | 35774065  | + | G | G |
| 19 | 18731462  | 18731462  | + | C | C |
| 3  | 122215404 | 122215404 | + | G | G |

|    |           |           |   |   |   |
|----|-----------|-----------|---|---|---|
| 12 | 10339154  | 10339154  | + | C | C |
| 8  | 71646437  | 71646437  | + | G | G |
| 10 | 81060620  | 81060620  | + | C | C |
| 1  | 12183855  | 12183855  | + | C | C |
| 10 | 104836981 | 104836981 | + | C | C |
| 5  | 94289057  | 94289057  | + | C | C |
| 1  | 160098788 | 160098788 | + | G | G |
| 16 | 31332864  | 31332864  | + | G | G |
| 1  | 55473915  | 55473915  | + | C | C |
| 7  | 89901209  | 89901209  | + | A | A |
| 19 | 38028313  | 38028313  | + | G | G |
| 1  | 196646665 | 196646665 | + | G | G |
| 19 | 11944715  | 11944715  | + | A | A |
| 3  | 44893412  | 44893412  | + | G | G |
| 17 | 56232598  | 56232598  | + | C | C |
| 1  | 12785303  | 12785303  | + | G | G |
| 4  | 148461574 | 148461574 | + | G | G |
| 2  | 152138501 | 152138501 | + | C | C |
| 17 | 45822386  | 45822386  | + | G | G |
| 11 | 46727022  | 46727022  | + | C | C |
| 17 | 18154743  | 18154743  | + | G | G |
| 5  | 141244190 | 141244190 | + | G | G |
| 1  | 58521898  | 58521898  | + | C | C |
| 12 | 122097115 | 122097115 | + | C | C |
| 7  | 149517817 | 149517817 | + | G | G |
| 7  | 142832342 | 142832342 | + | G | G |
| 18 | 56820094  | 56820094  | + | C | C |
| 10 | 103912119 | 103912119 | + | C | C |
| 16 | 19547901  | 19547901  | + | G | G |
| 19 | 17370777  | 17370777  | + | G | G |
| 17 | 10399438  | 10399438  | + | C | C |
| 14 | 23346308  | 23346308  | + | C | C |
| 12 | 57488475  | 57488475  | + | A | A |
| 1  | 197019884 | 197019884 | + | C | C |
| 15 | 74908184  | 74908184  | + | G | G |
| 2  | 160728856 | 160728856 | + | C | C |
| 4  | 148985621 | 148985621 | + | G | G |
| 5  | 15928429  | 15928429  | + | C | C |
| 10 | 102048735 | 102048735 | + | C | C |
| 5  | 66426055  | 66426055  | + | G | G |
| 2  | 192701240 | 192701240 | + | C | C |
| 17 | 4936810   | 4936810   | + | G | G |
| 1  | 248059632 | 248059632 | + | C | C |

|    |           |           |   |   |   |
|----|-----------|-----------|---|---|---|
| 17 | 3921223   | 3921223   | + | G | G |
| 10 | 12238135  | 12238135  | + | G | G |
| 3  | 138724835 | 138724835 | + | G | G |
| 11 | 76871256  | 76871256  | + | C | C |
| 17 | 15848856  | 15848856  | + | C | C |
| 14 | 107113998 | 107113998 | + | G | G |
| 7  | 123296286 | 123296286 | + | G | G |
| 17 | 79632642  | 79632642  | + | T | T |
| 6  | 149699239 | 149699239 | + | C | C |
| 15 | 66625105  | 66625105  | + | A | A |
| 19 | 14294438  | 14294438  | + | G | G |
| 5  | 178418939 | 178418939 | + | G | G |
| 3  | 157098986 | 157098986 | + | G | G |
| 17 | 60483859  | 60483859  | + | C | C |
| 7  | 141740578 | 141740578 | + | A | A |
| 7  | 16722403  | 16722403  | + | A | A |
| 20 | 377029    | 377029    | + | C | C |
| 17 | 72348975  | 72348975  | + | A | A |
| X  | 69639960  | 69639960  | + | C | C |
| 10 | 135350613 | 135350613 | + | C | C |
| 6  | 37403498  | 37403498  | + | C | C |
| 17 | 37331838  | 37331838  | + | G | G |
| 2  | 137872755 | 137872755 | + | G | G |
| 17 | 6690878   | 6690878   | + | C | C |
| 7  | 143701809 | 143701809 | + | C | C |
| 14 | 23416390  | 23416390  | + | G | G |
| 10 | 75533671  | 75533671  | + | A | A |
| 11 | 3037035   | 3037035   | + | G | G |
| 10 | 61023879  | 61023879  | + | C | C |
| 1  | 247486516 | 247486516 | + | G | G |
| 1  | 196927048 | 196927048 | + | C | C |
| 7  | 4965111   | 4965111   | + | C | C |
| 16 | 57917966  | 57917966  | + | C | C |
| 17 | 42398142  | 42398142  | + | G | G |
| 11 | 64535583  | 64535583  | + | G | G |
| 1  | 28559512  | 28559512  | + | C | C |
| 11 | 7059931   | 7059931   | + | G | G |
| 3  | 194062051 | 194062051 | + | C | C |
| 10 | 115603906 | 115603906 | + | G | G |
| 2  | 100170942 | 100170942 | + | C | C |
| 1  | 63894683  | 63894683  | + | C | C |
| 15 | 78894423  | 78894423  | + | G | G |
| 3  | 121822487 | 121822487 | + | C | C |



|    |           |           |   |   |   |
|----|-----------|-----------|---|---|---|
| 3  | 195711046 | 195711046 | + | G | G |
| 8  | 93023177  | 93023177  | + | C | C |
| 1  | 51754578  | 51754578  | + | C | C |
| 9  | 4622434   | 4622434   | + | G | G |
| 15 | 66841033  | 66841033  | + | G | G |
| 1  | 110906280 | 110906280 | + | C | C |
| 2  | 166848630 | 166848630 | + | G | G |
| 20 | 54573577  | 54573577  | + | C | C |
| 2  | 132290315 | 132290315 | + | C | C |
| 19 | 41808473  | 41808473  | + | C | C |
| X  | 122737276 | 122737276 | + | G | G |
| 8  | 55541830  | 55541830  | + | G | G |
| 22 | 32015560  | 32015560  | + | G | G |
| 16 | 89346438  | 89346438  | + | G | G |
| 11 | 46727023  | 46727023  | + | C | C |
| 1  | 159275977 | 159275977 | + | G | G |
| 2  | 179495629 | 179495629 | + | C | C |
| 14 | 75142488  | 75142488  | + | C | C |
| 3  | 111981916 | 111981916 | + | A | A |
| X  | 101971194 | 101971194 | + | G | G |
| 14 | 104493110 | 104493110 | + | C | C |
| 19 | 16435701  | 16435701  | + | C | C |
| 2  | 166536266 | 166536266 | + | G | G |
| 1  | 177250267 | 177250267 | + | C | C |
| 6  | 30114977  | 30114977  | + | C | C |
| 8  | 71499169  | 71499169  | + | G | G |
| 10 | 78651355  | 78651355  | + | C | C |
| 11 | 48510571  | 48510571  | + | C | C |
| 16 | 46713039  | 46713039  | + | G | G |
| 7  | 150217381 | 150217381 | + | G | G |
| 4  | 47647182  | 47647182  | + | G | G |
| 7  | 39491250  | 39491250  | + | C | C |
| 12 | 42512917  | 42512917  | + | C | C |
| 16 | 15818718  | 15818718  | + | C | C |
| 7  | 98445847  | 98445847  | + | G | G |
| X  | 127186308 | 127186308 | + | C | C |
| 3  | 155203356 | 155203356 | + | C | C |
| 7  | 72714554  | 72714554  | + | G | G |
| 6  | 123101545 | 123101545 | + | G | G |
| 7  | 48311791  | 48311791  | + | C | C |
| 7  | 33020055  | 33020055  | + | C | C |
| 7  | 14216393  | 14216393  | + | A | A |
| 6  | 7590595   | 7590595   | + | C | C |

|    |           |           |   |   |   |
|----|-----------|-----------|---|---|---|
| X  | 16876974  | 16876974  | + | T | T |
| 8  | 110455971 | 110455971 | + | G | G |
| 2  | 86993128  | 86993128  | + | G | G |
| 12 | 4870136   | 4870136   | + | G | G |
| 7  | 148544285 | 148544285 | + | C | C |
| 14 | 20404190  | 20404190  | + | G | G |
| 2  | 27551410  | 27551410  | + | C | C |
| 1  | 44084840  | 44084840  | + | C | C |
| 11 | 76727768  | 76727768  | + | C | C |
| 19 | 58067447  | 58067447  | + | G | G |
| 20 | 42635265  | 42635265  | + | C | C |
| 9  | 137591910 | 137591910 | + | G | G |
| 4  | 38698916  | 38698916  | + | C | C |
| 16 | 29883583  | 29883583  | + | G | G |
| 5  | 15928373  | 15928373  | + | C | C |
| 14 | 28734047  | 28734047  | + | G | G |
| 1  | 232539256 | 232539256 | + | C | C |
| 2  | 167322423 | 167322423 | + | A | A |
| 7  | 27135349  | 27135349  | + | G | G |
| 2  | 62104159  | 62104159  | + | C | C |
| 1  | 180151426 | 180151426 | + | C | C |
| 8  | 93029740  | 93029740  | + | G | G |
| 7  | 81358994  | 81358994  | + | C | C |
| 12 | 69252816  | 69252816  | + | G | G |
| 15 | 41961036  | 41961036  | + | C | C |
| 1  | 248224771 | 248224771 | + | C | C |
| 17 | 48653386  | 48653386  | + | C | C |
| 12 | 12278336  | 12278336  | + | G | G |
| 12 | 70794080  | 70794080  | + | C | C |
| 16 | 50346945  | 50346945  | + | G | G |
| 9  | 87563491  | 87563491  | + | G | G |
| 6  | 30126250  | 30126250  | + | C | C |
| 5  | 32072395  | 32072395  | + | G | G |
| 19 | 10514259  | 10514259  | + | G | G |
| 6  | 32190781  | 32190781  | + | C | C |
| 11 | 55062863  | 55062863  | + | G | G |
| 1  | 248112947 | 248112947 | + | C | C |
| 10 | 81373975  | 81373975  | + | C | C |
| 17 | 50235343  | 50235343  | + | C | C |
| 3  | 126137585 | 126137585 | + | G | G |
| 15 | 33962711  | 33962711  | + | C | C |
| 2  | 228881545 | 228881545 | + | G | G |
| 1  | 203798738 | 203798738 | + | C | C |

|    |           |           |   |   |   |
|----|-----------|-----------|---|---|---|
| 3  | 122247560 | 122247560 | + | G | G |
| X  | 77912994  | 77912994  | + | G | G |
| 15 | 75649201  | 75649201  | + | C | C |
| 17 | 4111336   | 4111336   | + | C | C |
| 6  | 143793406 | 143793406 | + | T | T |
| 22 | 46611173  | 46611173  | + | C | C |
| 14 | 77257642  | 77257642  | + | G | G |
| 5  | 121786825 | 121786825 | + | C | C |
| 3  | 37458845  | 37458845  | + | C | C |
| 3  | 125879717 | 125879717 | + | C | C |
| 21 | 11014998  | 11014998  | + | G | G |
| 16 | 7760684   | 7760684   | + | C | C |
| 17 | 76046047  | 76046047  | + | C | C |
| 10 | 124380742 | 124380742 | + | C | C |
| 10 | 68687255  | 68687255  | + | G | G |
| 19 | 19766258  | 19766258  | + | G | G |
| 6  | 31827629  | 31827629  | + | G | G |
| 14 | 22322298  | 22322298  | + | G | G |
| 3  | 127399604 | 127399604 | + | C | C |
| 7  | 24738798  | 24738798  | + | C | C |
| 2  | 21230881  | 21230881  | + | G | G |
| 6  | 84117546  | 84117546  | + | C | C |
| 19 | 38857945  | 38857945  | + | C | C |
| 9  | 104432549 | 104432549 | + | G | G |
| 16 | 67696068  | 67696068  | + | G | G |
| 1  | 110655239 | 110655239 | + | G | G |
| 5  | 79032435  | 79032435  | + | G | G |
| 14 | 51089961  | 51089961  | + | G | G |
| 11 | 63283168  | 63283168  | + | C | C |
| 20 | 45865220  | 45865220  | + | G | G |
| 17 | 54450107  | 54450107  | + | C | C |
| 15 | 54025235  | 54025235  | + | C | C |
| 9  | 90749724  | 90749724  | + | G | G |
| 7  | 103368592 | 103368592 | + | A | A |
| 7  | 83047777  | 83047777  | + | G | G |
| X  | 18192286  | 18192286  | + | G | G |
| 19 | 38995970  | 38995970  | + | G | G |
| 18 | 29419318  | 29419318  | + | G | G |
| 6  | 66205396  | 66205396  | + | T | T |
| 18 | 6213189   | 6213189   | + | G | G |
| 4  | 175710058 | 175710058 | + | A | A |
| 17 | 4927589   | 4927589   | + | G | G |
| 17 | 65714151  | 65714151  | + | A | A |

|    |           |           |   |   |   |
|----|-----------|-----------|---|---|---|
| 19 | 2222430   | 2222430   | + | C | C |
| 12 | 18891529  | 18891529  | + | C | C |
| 10 | 30749641  | 30749641  | + | C | C |
| 8  | 114186119 | 114186119 | + | G | G |
| 10 | 102256066 | 102256066 | + | G | G |
| 13 | 21265261  | 21265261  | + | G | G |
| 11 | 123847856 | 123847856 | + | G | G |
| 16 | 57732829  | 57732829  | + | G | G |
| 1  | 67148032  | 67148032  | + | C | C |
| 11 | 102584055 | 102584055 | + | G | G |
| 9  | 79320808  | 79320808  | + | C | C |
| 18 | 43462430  | 43462430  | + | C | C |
| 8  | 22974644  | 22974644  | + | C | C |
| 14 | 92909797  | 92909797  | + | C | C |
| 11 | 134104911 | 134104911 | + | C | C |
| 19 | 19545925  | 19545925  | + | A | A |
| 17 | 42335428  | 42335428  | + | G | G |
| 7  | 128766904 | 128766904 | + | G | G |
| 3  | 53153976  | 53153976  | + | G | G |
| 19 | 55176681  | 55176681  | + | G | G |
| 8  | 10583816  | 10583816  | + | C | C |
| 13 | 70275882  | 70275882  | + | C | C |
| 11 | 58746381  | 58746381  | + | G | G |
| 6  | 136599579 | 136599579 | + | G | G |
| 7  | 150720253 | 150720253 | + | G | G |
| 20 | 44003993  | 44003993  | + | C | C |
| 6  | 100368842 | 100368842 | + | C | C |
| 6  | 28540442  | 28540442  | + | C | C |
| 1  | 62676880  | 62676880  | + | A | A |
| 20 | 55043718  | 55043718  | + | T | T |
| 8  | 121256236 | 121256236 | + | C | C |
| 19 | 45515238  | 45515238  | + | G | G |
| 9  | 138671311 | 138671311 | + | G | G |
| 6  | 25726761  | 25726761  | + | C | C |
| 7  | 142658514 | 142658514 | + | G | G |
| 5  | 79355647  | 79355647  | + | C | C |
| 19 | 51628575  | 51628575  | + | G | G |
| 5  | 78347173  | 78347173  | + | C | C |
| 14 | 53100586  | 53100586  | + | G | G |
| 9  | 140100126 | 140100126 | + | C | C |
| 6  | 73951939  | 73951939  | + | C | C |
| 3  | 119812430 | 119812430 | + | C | C |
| 1  | 11736958  | 11736958  | + | G | G |

|    |           |           |   |   |   |
|----|-----------|-----------|---|---|---|
| 7  | 141755472 | 141755472 | + | G | G |
| 19 | 7854766   | 7854766   | + | G | G |
| 1  | 119428018 | 119428018 | + | G | G |
| 14 | 61180912  | 61180912  | + | G | G |
| 4  | 118975189 | 118975189 | + | G | G |
| 16 | 9984935   | 9984935   | + | C | C |
| 2  | 27156166  | 27156166  | + | C | C |
| 20 | 8632083   | 8632083   | + | G | G |
| 12 | 58125381  | 58125381  | + | C | C |
| 1  | 46500983  | 46500983  | + | C | C |
| 10 | 72610912  | 72610912  | + | G | G |
| 7  | 34884512  | 34884512  | + | G | G |
| 1  | 164789315 | 164789315 | + | C | C |
| 21 | 14414908  | 14414908  | + | G | G |
| 7  | 4153706   | 4153706   | + | C | C |
| 15 | 93015445  | 93015445  | + | G | G |
| 3  | 161221183 | 161221183 | + | G | G |
| 12 | 93150115  | 93150115  | + | C | C |
| X  | 88009010  | 88009010  | + | C | C |
| 5  | 55202106  | 55202106  | + | G | G |
| 10 | 116975529 | 116975529 | + | G | G |
| 3  | 50602984  | 50602984  | + | G | G |
| 15 | 74588234  | 74588234  | + | C | C |
| 10 | 82096058  | 82096058  | + | G | G |
| 20 | 31626759  | 31626759  | + | C | C |
| 6  | 152861113 | 152861113 | + | G | G |
| 9  | 140852140 | 140852140 | + | G | G |
| 3  | 47050784  | 47050784  | + | G | G |
| 8  | 121383479 | 121383479 | + | G | G |
| 18 | 22907626  | 22907626  | + | T | T |
| 2  | 97494370  | 97494370  | + | G | G |
| 2  | 202525070 | 202525070 | + | C | C |
| 14 | 88904698  | 88904698  | + | C | C |
| 5  | 72469680  | 72469680  | + | G | G |
| 12 | 85449538  | 85449538  | + | G | G |
| 19 | 18330307  | 18330307  | + | C | C |
| 4  | 142053660 | 142053660 | + | G | G |
| 10 | 102306904 | 102306904 | + | C | C |
| 9  | 27206724  | 27206724  | + | C | C |
| 7  | 1586639   | 1586639   | + | C | C |
| 12 | 51890899  | 51890899  | + | G | G |
| 7  | 82455951  | 82455951  | + | G | G |
| 1  | 75681462  | 75681462  | + | A | A |

|    |           |           |   |   |   |
|----|-----------|-----------|---|---|---|
| 11 | 134188972 | 134188972 | + | C | C |
| 11 | 63585315  | 63585315  | + | C | C |
| 8  | 10583747  | 10583747  | + | G | G |
| 8  | 75761441  | 75761441  | + | C | C |
| 16 | 90162492  | 90162492  | + | C | C |
| 2  | 241530282 | 241530282 | + | C | C |
| 18 | 60036629  | 60036629  | + | C | C |
| 19 | 13319654  | 13319654  | + | C | C |
| 17 | 74383618  | 74383618  | + | C | C |
| 20 | 30421576  | 30421576  | + | G | G |
| 13 | 38357147  | 38357147  | + | G | G |
| 14 | 57092171  | 57092171  | + | G | G |
| 5  | 80388680  | 80388680  | + | C | C |
| 14 | 19553777  | 19553777  | + | G | G |
| 12 | 46591789  | 46591789  | + | G | G |
| 16 | 19498580  | 19498580  | + | C | C |
| X  | 131206366 | 131206366 | + | C | C |
| 14 | 78709833  | 78709833  | + | G | G |
| 3  | 64641360  | 64641360  | + | G | G |
| 2  | 135616903 | 135616903 | + | C | C |
| 12 | 48962875  | 48962875  | + | G | G |
| 7  | 154875982 | 154875982 | + | G | G |
| 4  | 77003118  | 77003118  | + | G | G |
| 22 | 40759063  | 40759063  | + | C | C |
| 9  | 32631906  | 32631906  | + | G | G |
| 5  | 112102945 | 112102945 | + | C | C |
| 1  | 248737360 | 248737360 | + | C | C |
| 18 | 10672701  | 10672701  | + | G | G |
| 10 | 105832981 | 105832981 | + | C | C |
| 5  | 45262090  | 45262090  | + | C | C |
| 2  | 55433405  | 55433405  | + | C | C |
| 19 | 11417269  | 11417269  | + | C | C |
| 9  | 130688240 | 130688240 | + | G | G |
| 20 | 62838966  | 62838966  | + | C | C |
| 14 | 19378025  | 19378025  | + | C | C |
| 17 | 38324528  | 38324528  | + | C | C |
| 22 | 50722136  | 50722136  | + | G | G |
| 4  | 188924973 | 188924973 | + | G | G |
| 19 | 17692142  | 17692142  | + | G | G |
| 21 | 11058339  | 11058339  | + | G | G |
| 5  | 137803037 | 137803037 | + | G | G |
| 18 | 46284342  | 46284342  | + | C | C |
| 14 | 55458080  | 55458080  | + | C | C |

|    |           |           |   |   |   |
|----|-----------|-----------|---|---|---|
| 4  | 78804479  | 78804479  | + | C | C |
| 16 | 28137118  | 28137118  | + | G | G |
| 2  | 61577792  | 61577792  | + | G | G |
| 16 | 90160969  | 90160969  | + | G | G |
| 8  | 113293423 | 113293423 | + | C | C |
| 4  | 189068451 | 189068451 | + | C | C |
| 5  | 140531395 | 140531395 | + | C | C |
| 11 | 49974494  | 49974494  | + | C | C |
| 3  | 47823098  | 47823098  | + | T | T |
| 2  | 160692054 | 160692054 | + | C | C |
| 3  | 189713187 | 189713187 | + | G | G |
| 1  | 158300760 | 158300760 | + | C | C |
| 1  | 197057487 | 197057487 | + | G | G |
| 16 | 50818355  | 50818355  | + | C | C |
| X  | 132838301 | 132838301 | + | C | C |
| 2  | 189876652 | 189876652 | + | G | G |
| 2  | 79312367  | 79312367  | + | G | G |
| 14 | 103807434 | 103807434 | + | T | T |
| 5  | 177669349 | 177669349 | + | C | C |
| 2  | 179742794 | 179742794 | + | G | G |
| 10 | 91177187  | 91177187  | + | A | A |
| 5  | 13753592  | 13753592  | + | A | A |
| 3  | 148600347 | 148600347 | + | C | C |
| 7  | 619011    | 619011    | + | G | G |
| 6  | 2770555   | 2770555   | + | C | C |
| 15 | 73562445  | 73562445  | + | C | C |
| 18 | 54814841  | 54814841  | + | G | G |
| 5  | 176519908 | 176519908 | + | G | G |
| 11 | 5537573   | 5537573   | + | C | C |
| 5  | 140594186 | 140594186 | + | G | G |
| 7  | 99092083  | 99092083  | + | G | G |
| X  | 41204569  | 41204569  | + | G | G |
| 8  | 71036984  | 71036984  | + | G | G |
| 7  | 23731200  | 23731200  | + | G | G |
| 16 | 30992384  | 30992384  | + | C | C |
| 2  | 113788718 | 113788718 | + | T | T |
| 8  | 17422631  | 17422631  | + | C | C |
| 11 | 6648873   | 6648873   | + | G | G |
| 9  | 5920261   | 5920261   | + | A | A |
| 14 | 22616566  | 22616566  | + | G | G |
| 2  | 100210299 | 100210299 | + | G | G |
| 20 | 56136615  | 56136615  | + | G | G |
| 7  | 76796989  | 76796989  | + | G | G |

|    |           |           |   |   |   |
|----|-----------|-----------|---|---|---|
| 2  | 130832851 | 130832851 | + | G | G |
| X  | 118724139 | 118724139 | + | G | G |
| 17 | 44061161  | 44061161  | + | C | C |
| 17 | 43181199  | 43181199  | + | C | C |
| 8  | 70550998  | 70550998  | + | G | G |
| 3  | 168834378 | 168834378 | + | C | C |
| 1  | 60506799  | 60506799  | + | G | G |
| 16 | 3165597   | 3165597   | + | T | T |
| 19 | 47935411  | 47935411  | + | C | C |
| 7  | 128297857 | 128297857 | + | C | C |
| 14 | 96707751  | 96707751  | + | G | G |
| 11 | 64847020  | 64847020  | + | G | G |
| 6  | 97246308  | 97246308  | + | A | A |
| 14 | 23817113  | 23817113  | + | G | G |
| 1  | 37948511  | 37948511  | + | C | C |
| 6  | 47647852  | 47647852  | + | A | A |
| 7  | 143792221 | 143792221 | + | G | G |
| 12 | 7654044   | 7654044   | + | C | C |
| 1  | 144854182 | 144854182 | + | C | C |
| 2  | 38978507  | 38978507  | + | G | G |
| 19 | 1877496   | 1877496   | + | G | G |
| 19 | 52272365  | 52272365  | + | C | C |
| 22 | 19220972  | 19220972  | + | G | G |
| 6  | 152748924 | 152748924 | + | C | C |
| 7  | 64292202  | 64292202  | + | C | C |
| 8  | 14022131  | 14022131  | + | C | C |
| 5  | 13817692  | 13817692  | + | G | G |
| 3  | 196733530 | 196733530 | + | C | C |
| 1  | 156144686 | 156144686 | + | C | C |
| 8  | 55542260  | 55542260  | + | G | G |
| 7  | 86493633  | 86493633  | + | G | G |
| 5  | 150663658 | 150663658 | + | C | C |
| 8  | 7308374   | 7308374   | + | C | C |
| 3  | 48683211  | 48683211  | + | C | C |
| 15 | 67713895  | 67713895  | + | C | C |
| 20 | 62038082  | 62038082  | + | A | A |
| 11 | 5068292   | 5068292   | + | C | C |
| 7  | 82545060  | 82545060  | + | C | C |
| 8  | 39103634  | 39103634  | + | G | G |
| 7  | 95818638  | 95818638  | + | G | G |
| 5  | 73163841  | 73163841  | + | G | G |
| 20 | 4850528   | 4850528   | + | G | G |
| 1  | 220152783 | 220152783 | + | G | G |



|    |           |           |   |   |   |
|----|-----------|-----------|---|---|---|
| 12 | 79685830  | 79685830  | + | G | G |
| 11 | 111835370 | 111835370 | + | G | G |
| 14 | 22471846  | 22471846  | + | C | C |
| 6  | 46190752  | 46190752  | + | G | G |
| 19 | 17950312  | 17950312  | + | G | G |
| 3  | 52426672  | 52426672  | + | G | G |
| 7  | 139661795 | 139661795 | + | C | C |
| 19 | 4323231   | 4323231   | + | C | C |
| 18 | 644941    | 644941    | + | C | C |
| 1  | 39815220  | 39815220  | + | A | A |
| 7  | 81350155  | 81350155  | + | G | G |
| 15 | 72454278  | 72454278  | + | G | G |
| 11 | 128709313 | 128709313 | + | C | C |
| X  | 138619524 | 138619524 | + | G | G |
| 12 | 52841042  | 52841042  | + | C | C |
| 2  | 31569643  | 31569643  | + | C | C |
| 11 | 1718712   | 1718712   | + | C | C |
| 12 | 7869588   | 7869588   | + | C | C |
| 19 | 10419099  | 10419099  | + | G | G |
| 10 | 26513579  | 26513579  | + | C | C |
| 1  | 240371421 | 240371421 | + | C | C |
| 16 | 24582988  | 24582988  | + | C | C |
| 1  | 110149038 | 110149038 | + | C | C |
| 2  | 238287861 | 238287861 | + | C | C |
| 3  | 184009006 | 184009006 | + | G | G |
| 8  | 22104763  | 22104763  | + | G | G |
| 19 | 19766259  | 19766259  | + | G | G |
| 16 | 3433671   | 3433671   | + | T | T |
| 21 | 43913099  | 43913099  | + | C | C |
| 19 | 35422839  | 35422839  | + | C | C |
| 9  | 33240251  | 33240251  | + | C | C |
| 19 | 44513039  | 44513039  | + | T | T |
| 1  | 152280374 | 152280374 | + | G | G |
| 6  | 139495580 | 139495580 | + | C | C |
| 5  | 169031154 | 169031154 | + | C | C |
| 6  | 119345564 | 119345564 | + | C | C |
| 7  | 75932258  | 75932258  | + | C | C |
| 17 | 6023702   | 6023702   | + | G | G |
| 11 | 111154989 | 111154989 | + | G | G |
| 17 | 38933284  | 38933284  | + | G | G |
| 2  | 71190730  | 71190730  | + | G | G |
| 10 | 49654598  | 49654598  | + | C | C |
| 2  | 145154007 | 145154007 | + | G | G |

|    |           |           |   |   |   |
|----|-----------|-----------|---|---|---|
| 7  | 95157692  | 95157692  | + | A | A |
| 8  | 93023178  | 93023178  | + | C | C |
| 14 | 92139290  | 92139290  | + | C | C |
| 11 | 78516405  | 78516405  | + | C | C |
| 2  | 170147476 | 170147476 | + | G | G |
| 19 | 44050822  | 44050822  | + | G | G |
| 1  | 162324998 | 162324998 | + | A | A |
| 8  | 141301118 | 141301118 | + | G | G |
| 22 | 24086278  | 24086278  | + | G | G |
| 2  | 141079628 | 141079628 | + | C | C |
| 5  | 168093429 | 168093429 | + | C | C |
| 16 | 53326833  | 53326833  | + | G | G |
| 8  | 48114131  | 48114131  | + | G | G |
| 6  | 136603760 | 136603760 | + | T | T |
| 13 | 33741688  | 33741688  | + | C | C |
| 10 | 135101651 | 135101651 | + | G | G |
| 6  | 97594656  | 97594656  | + | A | A |
| 7  | 128297858 | 128297858 | + | C | C |
| 16 | 19067875  | 19067875  | + | C | C |
| 2  | 167055739 | 167055739 | + | C | C |
| 12 | 31283451  | 31283451  | + | C | C |
| 16 | 1417820   | 1417820   | + | G | G |
| 15 | 22414169  | 22414169  | + | C | C |
| 2  | 179598590 | 179598590 | + | C | C |
| 12 | 102590939 | 102590939 | + | G | G |
| 19 | 39663980  | 39663980  | + | G | G |
| 15 | 72494809  | 72494809  | + | G | G |
| 20 | 13273048  | 13273048  | + | C | C |
| X  | 77302104  | 77302104  | + | G | G |
| 15 | 33954446  | 33954446  | + | G | G |
| 12 | 9571083   | 9571083   | + | C | C |
| 11 | 64116902  | 64116902  | + | C | C |
| 1  | 152284729 | 152284729 | + | C | C |
| 10 | 31138420  | 31138420  | + | A | A |
| 22 | 22697938  | 22697938  | + | G | G |
| 1  | 119965060 | 119965060 | + | C | C |
| 2  | 96803432  | 96803432  | + | G | G |
| 1  | 52285513  | 52285513  | + | G | G |
| 1  | 37270474  | 37270474  | + | T | T |
| 3  | 69987152  | 69987152  | + | C | C |
| X  | 37587142  | 37587142  | + | C | C |
| 17 | 11701085  | 11701085  | + | C | C |
| 14 | 79175869  | 79175869  | + | G | G |

|    |           |           |   |   |   |
|----|-----------|-----------|---|---|---|
| 1  | 236738070 | 236738070 | + | G | G |
| 1  | 54344038  | 54344038  | + | G | G |
| 7  | 158334250 | 158334250 | + | G | G |
| 17 | 10427954  | 10427954  | + | C | C |
| 19 | 12976561  | 12976561  | + | C | C |
| 7  | 156974971 | 156974971 | + | G | G |
| 7  | 100490408 | 100490408 | + | G | G |
| 12 | 49259638  | 49259638  | + | C | C |
| X  | 151869643 | 151869643 | + | G | G |
| 5  | 172535678 | 172535678 | + | C | C |
| 18 | 6961602   | 6961602   | + | G | G |
| 19 | 7677352   | 7677352   | + | C | C |
| 1  | 57480591  | 57480591  | + | G | G |
| 1  | 201197635 | 201197635 | + | G | G |
| 4  | 169812072 | 169812072 | + | G | G |
| 10 | 75277311  | 75277311  | + | G | G |
| 6  | 33334050  | 33334050  | + | C | C |
| 12 | 104651827 | 104651827 | + | C | C |
| 1  | 228598832 | 228598832 | + | T | T |
| 19 | 44833658  | 44833658  | + | C | C |
| 7  | 150815705 | 150815705 | + | G | G |
| 19 | 1115968   | 1115968   | + | G | G |
| 19 | 868239    | 868239    | + | G | G |
| 11 | 1778746   | 1778746   | + | C | C |
| 7  | 101821761 | 101821761 | + | G | G |
| 11 | 5221851   | 5221851   | + | G | G |
| 19 | 52825612  | 52825612  | + | C | C |
| 19 | 20808217  | 20808217  | + | G | G |
| 16 | 1470551   | 1470551   | + | G | G |
| 3  | 32804539  | 32804539  | + | C | C |
| X  | 18182903  | 18182903  | + | A | A |
| 18 | 21399891  | 21399891  | + | G | G |
| 17 | 19316496  | 19316496  | + | G | G |
| 17 | 76558012  | 76558012  | + | C | C |
| 9  | 23701496  | 23701496  | + | G | G |
| 19 | 16435702  | 16435702  | + | C | C |
| 7  | 14652981  | 14652981  | + | C | C |
| 8  | 136594218 | 136594218 | + | C | C |
| 2  | 71886137  | 71886137  | + | C | C |
| 17 | 26965416  | 26965416  | + | G | G |
| 19 | 16918497  | 16918497  | + | C | C |
| 1  | 1229568   | 1229568   | + | G | G |
| 20 | 44333637  | 44333637  | + | G | G |

|    |           |           |   |   |   |
|----|-----------|-----------|---|---|---|
| 5  | 137354782 | 137354782 | + | G | G |
| 2  | 73678243  | 73678243  | + | C | C |
| 16 | 20975060  | 20975060  | + | C | C |
| 5  | 70922576  | 70922576  | + | C | C |
| 17 | 79478816  | 79478816  | + | G | G |
| 6  | 116879256 | 116879256 | + | C | C |
| 9  | 132404189 | 132404189 | + | G | G |
| 15 | 51991527  | 51991527  | + | G | G |
| 19 | 58046621  | 58046621  | + | C | C |
| 1  | 31783002  | 31783002  | + | C | C |
| 17 | 7592117   | 7592117   | + | C | C |
| 2  | 231090546 | 231090546 | + | C | C |
| 5  | 142416821 | 142416821 | + | C | C |
| 10 | 135015293 | 135015293 | + | G | G |
| 5  | 160097553 | 160097553 | + | C | C |
| 19 | 6821818   | 6821818   | + | G | G |
| 16 | 7743332   | 7743332   | + | C | C |
| 22 | 25294081  | 25294081  | + | C | C |
| 10 | 88227215  | 88227215  | + | G | G |
| 1  | 154919126 | 154919126 | + | C | C |
| 11 | 40137376  | 40137376  | + | C | C |
| 13 | 28609673  | 28609673  | + | G | G |
| 19 | 56203234  | 56203234  | + | T | T |
| 15 | 51687104  | 51687104  | + | G | G |
| 11 | 34097975  | 34097975  | + | G | G |
| 8  | 52567284  | 52567284  | + | C | C |
| 1  | 53543385  | 53543385  | + | G | G |
| 10 | 86001149  | 86001149  | + | G | G |
| 15 | 31295245  | 31295245  | + | C | C |
| 11 | 4825161   | 4825161   | + | G | G |
| 15 | 77406765  | 77406765  | + | G | G |
| 7  | 142573374 | 142573374 | + | C | C |
| 22 | 24584408  | 24584408  | + | G | G |
| 2  | 102956661 | 102956661 | + | G | G |
| 5  | 170145766 | 170145766 | + | G | G |
| 5  | 57913671  | 57913671  | + | G | G |
| 17 | 40353682  | 40353682  | + | C | C |
| 16 | 10867176  | 10867176  | + | C | C |
| 8  | 57354009  | 57354009  | + | C | C |
| 9  | 12709240  | 12709240  | + | G | G |
| 11 | 77301540  | 77301540  | + | T | T |
| 5  | 64748576  | 64748576  | + | G | G |
| 5  | 42719061  | 42719061  | + | C | C |

|    |           |           |   |   |   |
|----|-----------|-----------|---|---|---|
| 7  | 44190560  | 44190560  | + | C | C |
| 17 | 3593740   | 3593740   | + | C | C |
| 3  | 24188205  | 24188205  | + | G | G |
| 16 | 30992385  | 30992385  | + | C | C |
| 7  | 96810373  | 96810373  | + | C | C |
| 14 | 94173297  | 94173297  | + | G | G |
| 5  | 139216414 | 139216414 | + | G | G |
| 1  | 55457629  | 55457629  | + | G | G |
| 6  | 32783080  | 32783080  | + | C | C |
| 17 | 36499017  | 36499017  | + | C | C |
| 19 | 22157111  | 22157111  | + | G | G |
| 18 | 12325889  | 12325889  | + | C | C |
| 1  | 181684475 | 181684475 | + | G | G |
| 19 | 9083789   | 9083789   | + | C | C |
| 14 | 95053802  | 95053802  | + | C | C |
| 22 | 37769860  | 37769860  | + | G | G |
| 10 | 74267951  | 74267951  | + | G | G |
| 15 | 22382673  | 22382673  | + | C | C |
| 1  | 241675292 | 241675292 | + | G | G |
| X  | 86873048  | 86873048  | + | C | C |
| 5  | 128957891 | 128957891 | + | G | G |
| 9  | 104124814 | 104124814 | + | C | C |
| 16 | 74640603  | 74640603  | + | G | G |
| 15 | 76797212  | 76797212  | + | C | C |
| 19 | 58862962  | 58862962  | + | G | G |
| 12 | 57005672  | 57005672  | + | G | G |
| 11 | 59415384  | 59415384  | + | G | G |
| 12 | 50400408  | 50400408  | + | A | A |
| 19 | 9076614   | 9076614   | + | G | G |
| 2  | 31010119  | 31010119  | + | G | G |
| 14 | 107013154 | 107013154 | + | G | G |
| 5  | 145439782 | 145439782 | + | G | G |
| 17 | 45822388  | 45822388  | + | G | G |
| 8  | 57228615  | 57228615  | + | C | C |
| 19 | 39914721  | 39914721  | + | C | C |
| 16 | 12497346  | 12497346  | + | T | T |
| 12 | 21329826  | 21329826  | + | G | G |
| 17 | 62817937  | 62817937  | + | C | C |
| 14 | 24877723  | 24877723  | + | C | C |
| 11 | 117281572 | 117281572 | + | C | C |
| 20 | 48497496  | 48497496  | + | C | C |
| 14 | 76429703  | 76429703  | + | C | C |
| 22 | 44107498  | 44107498  | + | C | C |

|    |           |           |   |   |   |
|----|-----------|-----------|---|---|---|
| 19 | 39924255  | 39924255  | + | G | G |
| X  | 105450886 | 105450886 | + | C | C |
| 12 | 55523876  | 55523876  | + | C | C |
| 7  | 99359693  | 99359693  | + | C | C |
| 6  | 152776599 | 152776599 | + | C | C |
| 8  | 86025334  | 86025334  | + | G | G |
| 16 | 49411676  | 49411676  | + | G | G |
| 19 | 9075562   | 9075562   | + | G | G |
| 19 | 10291119  | 10291119  | + | G | G |
| 17 | 43181200  | 43181200  | + | C | C |
| 15 | 53908356  | 53908356  | + | G | G |
| 11 | 3022197   | 3022197   | + | C | C |
| 8  | 143569727 | 143569727 | + | C | C |
| 19 | 18420554  | 18420554  | + | G | G |
| 19 | 56935414  | 56935414  | + | C | C |
| 19 | 38229213  | 38229213  | + | C | C |
| 3  | 133478170 | 133478170 | + | C | C |
| 19 | 32844669  | 32844669  | + | G | G |
| 3  | 37584030  | 37584030  | + | T | T |
| 3  | 39159567  | 39159567  | + | G | G |
| 8  | 16007817  | 16007817  | + | G | G |
| 11 | 67186892  | 67186892  | + | G | G |
| 5  | 65459667  | 65459667  | + | C | C |
| 1  | 12921509  | 12921509  | + | C | C |
| 17 | 26087109  | 26087109  | + | C | C |
| 1  | 156268876 | 156268876 | + | C | C |
| 22 | 17178619  | 17178619  | + | T | T |
| 12 | 57005673  | 57005673  | + | G | G |
| 19 | 8595449   | 8595449   | + | G | G |
| 6  | 17543167  | 17543167  | + | G | G |
| 5  | 102326031 | 102326031 | + | G | G |
| 5  | 139751183 | 139751183 | + | C | C |
| 18 | 14810125  | 14810125  | + | G | G |
| 11 | 57466129  | 57466129  | + | C | C |
| 4  | 164394172 | 164394172 | + | G | G |
| 9  | 130478304 | 130478304 | + | C | C |
| 11 | 72560919  | 72560919  | + | C | C |
| 12 | 13906841  | 13906841  | + | G | G |
| 3  | 37818936  | 37818936  | + | C | C |
| 1  | 25715535  | 25715535  | + | G | G |
| 3  | 24138140  | 24138140  | + | C | C |
| 2  | 138169587 | 138169587 | + | G | G |
| 2  | 74732206  | 74732206  | + | G | G |

|    |           |           |   |   |   |
|----|-----------|-----------|---|---|---|
| 15 | 43568754  | 43568754  | + | T | T |
| 5  | 176016169 | 176016169 | + | C | C |
| 19 | 56421982  | 56421982  | + | C | C |
| 16 | 20565157  | 20565157  | + | G | G |
| 1  | 160325494 | 160325494 | + | C | C |
| 12 | 56221307  | 56221307  | + | G | G |
| 7  | 35204550  | 35204550  | + | G | G |
| 5  | 149755432 | 149755432 | + | C | C |
| 11 | 111835369 | 111835369 | + | G | G |
| 11 | 1778747   | 1778747   | + | C | C |
| 20 | 3193998   | 3193998   | + | C | C |
| 8  | 37727883  | 37727883  | + | G | G |
| 20 | 46275859  | 46275859  | + | G | G |
| 8  | 70980588  | 70980588  | + | G | G |
| 7  | 128486940 | 128486940 | + | C | C |
| 8  | 98731331  | 98731331  | + | A | A |
| 2  | 71256863  | 71256863  | + | G | G |
| 6  | 26422353  | 26422353  | + | C | C |
| 2  | 182766810 | 182766810 | + | C | C |
| 3  | 159482259 | 159482259 | + | G | G |
| 8  | 67514724  | 67514724  | + | G | G |
| 5  | 150565651 | 150565651 | + | G | G |
| 2  | 179531599 | 179531599 | + | C | C |
| 3  | 113440551 | 113440551 | + | G | G |
| 8  | 144550389 | 144550389 | + | G | G |
| 18 | 55143819  | 55143819  | + | C | C |
| 16 | 614223    | 614223    | + | G | G |
| 15 | 42162682  | 42162682  | + | C | C |
| 16 | 25258337  | 25258337  | + | G | G |
| 17 | 47246195  | 47246195  | + | C | C |
| 17 | 41585748  | 41585748  | + | A | A |
| 7  | 135345012 | 135345012 | + | C | C |
| 10 | 124338276 | 124338276 | + | G | G |
| 10 | 37507929  | 37507929  | + | G | G |
| 17 | 6406888   | 6406888   | + | C | C |
| 12 | 117710322 | 117710322 | + | G | G |
| 1  | 169347677 | 169347677 | + | C | C |
| 7  | 142724217 | 142724217 | + | C | C |
| 1  | 86590635  | 86590635  | + | C | C |
| 3  | 50369596  | 50369596  | + | G | G |
| X  | 140926169 | 140926169 | + | A | A |
| 17 | 36724478  | 36724478  | + | G | G |
| 9  | 32635583  | 32635583  | + | G | G |

|    |           |           |   |   |   |
|----|-----------|-----------|---|---|---|
| 3  | 42954725  | 42954725  | + | C | C |
| 5  | 78350050  | 78350050  | + | G | G |
| 8  | 10470689  | 10470689  | + | C | C |
| 8  | 41530391  | 41530391  | + | G | G |
| 10 | 91067097  | 91067097  | + | C | C |
| 9  | 78784751  | 78784751  | + | C | C |
| 11 | 34098181  | 34098181  | + | G | G |
| 19 | 13323029  | 13323029  | + | G | G |
| 12 | 119589004 | 119589004 | + | G | G |
| 14 | 106173717 | 106173717 | + | C | C |
| 12 | 112590789 | 112590789 | + | C | C |
| 2  | 116520186 | 116520186 | + | G | G |
| 1  | 218578649 | 218578649 | + | C | C |
| 1  | 180775305 | 180775305 | + | T | T |
| 19 | 43428886  | 43428886  | + | G | G |
| 14 | 51238096  | 51238096  | + | G | G |
| 2  | 226378233 | 226378233 | + | C | C |
| 17 | 40850824  | 40850824  | + | C | C |
| 12 | 27465599  | 27465599  | + | C | C |
| 12 | 7175042   | 7175042   | + | G | G |
| 19 | 49223871  | 49223871  | + | C | C |
| 18 | 59217224  | 59217224  | + | G | G |
| 8  | 77618880  | 77618880  | + | C | C |
| 19 | 51361326  | 51361326  | + | C | C |
| 3  | 121340810 | 121340810 | + | C | C |
| 5  | 38352423  | 38352423  | + | G | G |
| 2  | 95511161  | 95511161  | + | C | C |
| 22 | 30858094  | 30858094  | + | C | C |
| 12 | 18435047  | 18435047  | + | C | C |
| 3  | 49845461  | 49845461  | + | G | G |
| 11 | 121016576 | 121016576 | + | C | C |
| 18 | 47429096  | 47429096  | + | G | G |
| 19 | 45322020  | 45322020  | + | G | G |
| 18 | 60036628  | 60036628  | + | C | C |
| 17 | 74155538  | 74155538  | + | G | G |
| 7  | 127228581 | 127228581 | + | C | C |
| 16 | 84203572  | 84203572  | + | A | A |
| 5  | 140530398 | 140530398 | + | G | G |
| 16 | 10867175  | 10867175  | + | A | A |
| 13 | 96601613  | 96601613  | + | G | G |
| 1  | 75072570  | 75072570  | + | C | C |
| 19 | 10097098  | 10097098  | + | C | C |
| 7  | 141722237 | 141722237 | + | G | G |



|    |           |           |   |   |   |
|----|-----------|-----------|---|---|---|
| 2  | 234386086 | 234386086 | + | G | G |
| 18 | 72775254  | 72775254  | + | C | C |
| 15 | 53994475  | 53994475  | + | C | C |
| 7  | 138764835 | 138764835 | + | G | G |
| 3  | 101390318 | 101390318 | + | G | G |
| 14 | 22192557  | 22192557  | + | C | C |
| 7  | 82595650  | 82595650  | + | G | G |
| 6  | 149699690 | 149699690 | + | C | C |
| 12 | 75698614  | 75698614  | + | T | T |
| 1  | 119427833 | 119427833 | + | G | G |
| 21 | 46702212  | 46702212  | + | G | G |
| 2  | 179577951 | 179577951 | + | C | C |
| 3  | 182751854 | 182751854 | + | G | G |
| 8  | 131861848 | 131861848 | + | G | G |
| 5  | 10981959  | 10981959  | + | C | C |
| 1  | 1849127   | 1849127   | + | C | C |
| 14 | 64494443  | 64494443  | + | C | C |
| 1  | 247920791 | 247920791 | + | G | G |
| 2  | 128409071 | 128409071 | + | C | C |
| 14 | 23596443  | 23596443  | + | G | G |
| 14 | 21899011  | 21899011  | + | G | G |
| 3  | 184090430 | 184090430 | + | G | G |
| 13 | 49281881  | 49281881  | + | G | G |
| 20 | 49224982  | 49224982  | + | G | G |
| 16 | 3405995   | 3405995   | + | G | G |
| 19 | 1923149   | 1923149   | + | C | C |
| 16 | 67696067  | 67696067  | + | G | G |
| 12 | 126138590 | 126138590 | + | G | G |
| 1  | 159505536 | 159505536 | + | G | G |
| 19 | 51770669  | 51770669  | + | G | G |
| 14 | 20249338  | 20249338  | + | C | C |
| 9  | 79792696  | 79792696  | + | C | C |
| 16 | 53692337  | 53692337  | + | G | G |
| 6  | 123101546 | 123101546 | + | G | G |
| 22 | 50720784  | 50720784  | + | G | G |
| 10 | 95987089  | 95987089  | + | C | C |
| 17 | 7163985   | 7163985   | + | T | T |
| 19 | 48919292  | 48919292  | + | T | T |
| 17 | 39911912  | 39911912  | + | G | G |
| 19 | 10132443  | 10132443  | + | G | G |
| 17 | 18181337  | 18181337  | + | C | C |
| 4  | 15835907  | 15835907  | + | G | G |
| 5  | 159776033 | 159776033 | + | G | G |

|    |           |           |   |   |   |
|----|-----------|-----------|---|---|---|
| 2  | 130877741 | 130877741 | + | C | C |
| 7  | 99092082  | 99092082  | + | G | G |
| 1  | 74507447  | 74507447  | + | G | G |
| 11 | 55606767  | 55606767  | + | C | C |
| 14 | 90770701  | 90770701  | + | G | G |
| 16 | 72828892  | 72828892  | + | G | G |
| 3  | 161214749 | 161214749 | + | C | C |
| 17 | 29631216  | 29631216  | + | T | T |
| 10 | 87615875  | 87615875  | + | T | T |
| 19 | 54545592  | 54545592  | + | G | G |
| 9  | 111911925 | 111911925 | + | C | C |
| 6  | 28327460  | 28327460  | + | G | G |
| 19 | 43772073  | 43772073  | + | C | C |
| 8  | 10177417  | 10177417  | + | G | G |
| 6  | 29639274  | 29639274  | + | G | G |
| 16 | 56374763  | 56374763  | + | C | C |
| 19 | 48306145  | 48306145  | + | G | G |
| 10 | 96701746  | 96701746  | + | C | C |
| 1  | 43909436  | 43909436  | + | G | G |
| 12 | 4554558   | 4554558   | + | C | C |
| 11 | 72407661  | 72407661  | + | C | C |
| 5  | 80409412  | 80409412  | + | G | G |
| 7  | 20793061  | 20793061  | + | C | C |
| 9  | 27213563  | 27213563  | + | C | C |
| 6  | 112455671 | 112455671 | + | G | G |
| 16 | 71895805  | 71895805  | + | G | G |
| 11 | 22397539  | 22397539  | + | G | G |
| 16 | 30793775  | 30793775  | + | G | G |
| 8  | 144621257 | 144621257 | + | G | G |
| 12 | 6696643   | 6696643   | + | C | C |
| 7  | 91726087  | 91726087  | + | G | G |
| 10 | 61832520  | 61832520  | + | C | C |
| 11 | 111383993 | 111383993 | + | C | C |
| 2  | 218674639 | 218674639 | + | G | G |
| 12 | 56236654  | 56236654  | + | C | C |
| 19 | 9063923   | 9063923   | + | C | C |
| 7  | 154002491 | 154002491 | + | C | C |
| 15 | 91292842  | 91292842  | + | C | C |
| 17 | 10210308  | 10210308  | + | G | G |
| X  | 14748696  | 14748696  | + | G | G |
| 6  | 31431303  | 31431303  | + | G | G |
| 6  | 31595834  | 31595834  | + | T | T |
| 19 | 11529356  | 11529356  | + | C | C |

|    |           |           |   |   |   |
|----|-----------|-----------|---|---|---|
| 17 | 19189019  | 19189019  | + | C | C |
| 17 | 47246196  | 47246196  | + | C | C |
| 2  | 101646238 | 101646238 | + | C | C |
| 19 | 18104336  | 18104336  | + | G | G |
| 1  | 159778933 | 159778933 | + | C | C |
| 3  | 48614162  | 48614162  | + | G | G |
| 4  | 22437066  | 22437066  | + | G | G |
| 17 | 19616049  | 19616049  | + | C | C |
| 1  | 45469165  | 45469165  | + | C | C |
| 7  | 107696285 | 107696285 | + | C | C |
| 22 | 19963233  | 19963233  | + | G | G |
| 10 | 98469485  | 98469485  | + | C | C |
| 11 | 26694959  | 26694959  | + | C | C |
| 7  | 142197663 | 142197663 | + | G | G |
| 20 | 18574433  | 18574433  | + | C | C |
| 15 | 62160060  | 62160060  | + | C | C |
| 9  | 3855836   | 3855836   | + | G | G |
| 9  | 130507043 | 130507043 | + | G | G |
| 5  | 140751107 | 140751107 | + | C | C |
| 6  | 42233514  | 42233514  | + | C | C |
| 12 | 6428061   | 6428061   | + | G | G |
| 8  | 53079447  | 53079447  | + | G | G |
| 15 | 22382951  | 22382951  | + | T | T |
| 19 | 22939793  | 22939793  | + | C | C |
| 11 | 68207281  | 68207281  | + | G | G |
| 17 | 7133705   | 7133705   | + | G | G |
| 5  | 140432760 | 140432760 | + | G | G |
| 3  | 24206599  | 24206599  | + | G | G |
| 9  | 79321830  | 79321830  | + | C | C |
| 1  | 208390597 | 208390597 | + | G | G |
| 12 | 21953942  | 21953942  | + | T | T |
| 5  | 16067764  | 16067764  | + | C | C |
| 14 | 70924999  | 70924999  | + | G | G |
| 19 | 51483667  | 51483667  | + | G | G |
| 7  | 99802286  | 99802286  | + | G | G |
| 1  | 236973802 | 236973802 | + | G | G |
| 3  | 45159990  | 45159990  | + | G | G |
| 19 | 44513038  | 44513038  | + | C | C |
| 17 | 73487880  | 73487880  | + | C | C |
| 12 | 45457957  | 45457957  | + | C | C |
| 15 | 39879619  | 39879619  | + | G | G |
| 14 | 23863443  | 23863443  | + | G | G |
| 7  | 50742159  | 50742159  | + | G | G |

|    |           |           |   |   |   |
|----|-----------|-----------|---|---|---|
| 8  | 17198923  | 17198923  | + | C | C |
| 3  | 68802149  | 68802149  | + | C | C |
| 10 | 97956719  | 97956719  | + | C | C |
| 2  | 50574004  | 50574004  | + | C | C |
| 5  | 98212142  | 98212142  | + | G | G |
| 1  | 157660201 | 157660201 | + | G | G |
| 2  | 209203266 | 209203266 | + | C | C |
| 10 | 62023694  | 62023694  | + | T | T |
| 18 | 42531523  | 42531523  | + | G | G |
| 17 | 40622155  | 40622155  | + | C | C |
| 16 | 1544578   | 1544578   | + | C | C |
| 3  | 43121862  | 43121862  | + | G | G |
| 3  | 168810804 | 168810804 | + | G | G |
| 10 | 54527906  | 54527906  | + | G | G |
| 5  | 135385196 | 135385196 | + | G | G |
| 8  | 87393773  | 87393773  | + | G | G |
| 2  | 180837974 | 180837974 | + | C | C |
| 15 | 91436550  | 91436550  | + | G | G |
| 13 | 19412906  | 19412906  | + | C | C |
| 17 | 54526483  | 54526483  | + | G | G |
| 7  | 150417759 | 150417759 | + | G | G |
| 3  | 48507067  | 48507067  | + | C | C |
| 11 | 33374714  | 33374714  | + | C | C |
| X  | 151514068 | 151514068 | + | G | G |
| 6  | 66012226  | 66012226  | + | C | C |
| 16 | 3266305   | 3266305   | + | G | G |
| 17 | 44076946  | 44076946  | + | C | C |
| 11 | 66453874  | 66453874  | + | C | C |
| 1  | 115537766 | 115537766 | + | T | T |
| 19 | 4366529   | 4366529   | + | G | G |
| 16 | 77389886  | 77389886  | + | C | C |
| 19 | 43757713  | 43757713  | + | C | C |
| 7  | 45701665  | 45701665  | + | C | C |
| 6  | 112469367 | 112469367 | + | C | C |
| 8  | 144947145 | 144947145 | + | G | G |
| 5  | 23521240  | 23521240  | + | C | C |
| 19 | 51961242  | 51961242  | + | T | T |
| X  | 18259207  | 18259207  | + | G | G |
| 19 | 43576103  | 43576103  | + | C | C |
| 1  | 171086682 | 171086682 | + | C | C |
| 17 | 3807307   | 3807307   | + | C | C |
| 18 | 44559889  | 44559889  | + | C | C |
| 21 | 45999613  | 45999613  | + | A | A |

|    |           |           |   |   |   |
|----|-----------|-----------|---|---|---|
| 18 | 9513132   | 9513132   | + | C | C |
| 6  | 84567079  | 84567079  | + | G | G |
| 2  | 239140763 | 239140763 | + | A | A |
| 2  | 37334445  | 37334445  | + | G | G |
| 1  | 152538251 | 152538251 | + | G | G |
| 17 | 35414038  | 35414038  | + | C | C |
| 2  | 136566046 | 136566046 | + | A | A |
| 16 | 67976621  | 67976621  | + | C | C |
| 1  | 172410899 | 172410899 | + | G | G |
| 22 | 37769859  | 37769859  | + | G | G |
| 2  | 74710205  | 74710205  | + | C | C |
| 5  | 129243886 | 129243886 | + | A | A |
| 6  | 57059605  | 57059605  | + | G | G |
| 1  | 151748008 | 151748008 | + | C | C |
| X  | 84634228  | 84634228  | + | G | G |
| 20 | 42232505  | 42232505  | + | G | G |
| 2  | 905780    | 905780    | + | C | C |
| 19 | 51509915  | 51509915  | + | G | G |
| 17 | 39334394  | 39334394  | + | G | G |
| 16 | 17228496  | 17228496  | + | G | G |
| 18 | 14479062  | 14479062  | + | G | G |
| X  | 35969251  | 35969251  | + | G | G |
| 7  | 107799730 | 107799730 | + | G | G |
| 14 | 105350818 | 105350818 | + | G | G |
| 7  | 157959910 | 157959910 | + | G | G |
| 5  | 80382972  | 80382972  | + | C | C |
| 14 | 91639671  | 91639671  | + | C | C |
| 5  | 14291120  | 14291120  | + | G | G |
| 19 | 38865197  | 38865197  | + | C | C |
| 4  | 39779325  | 39779325  | + | C | C |
| 7  | 5925875   | 5925875   | + | G | G |
| 17 | 26370123  | 26370123  | + | C | C |
| 8  | 110474067 | 110474067 | + | G | G |
| 16 | 67942840  | 67942840  | + | C | C |
| X  | 122387229 | 122387229 | + | C | C |
| 15 | 39545035  | 39545035  | + | C | C |
| 1  | 160151533 | 160151533 | + | C | C |
| 20 | 47256403  | 47256403  | + | G | G |
| 9  | 35092536  | 35092536  | + | G | G |
| 2  | 27551409  | 27551409  | + | C | C |
| 19 | 45017003  | 45017003  | + | C | C |
| 2  | 183595773 | 183595773 | + | C | C |
| 17 | 7592118   | 7592118   | + | C | C |

|    |           |           |   |   |   |
|----|-----------|-----------|---|---|---|
| 1  | 185962503 | 185962503 | + | C | C |
| 17 | 56403719  | 56403719  | + | G | G |
| 2  | 196729430 | 196729430 | + | G | G |
| 14 | 77797445  | 77797445  | + | C | C |
| 5  | 31552973  | 31552973  | + | C | C |
| 17 | 56329555  | 56329555  | + | G | G |
| 10 | 88478536  | 88478536  | + | C | C |
| 7  | 140244287 | 140244287 | + | G | G |
| 3  | 38936048  | 38936048  | + | G | G |
| 10 | 104176450 | 104176450 | + | C | C |
| 4  | 100261732 | 100261732 | + | C | C |
| 20 | 29625879  | 29625879  | + | C | C |
| X  | 142718554 | 142718554 | + | G | G |
| 3  | 46754405  | 46754405  | + | C | C |
| 11 | 76261104  | 76261104  | + | G | G |
| 3  | 81643104  | 81643104  | + | G | G |
| 3  | 14746042  | 14746042  | + | C | C |
| 7  | 72412722  | 72412722  | + | C | C |
| 1  | 158644457 | 158644457 | + | C | C |
| 10 | 17083147  | 17083147  | + | G | G |
| 19 | 55142741  | 55142741  | + | G | G |
| 1  | 210334132 | 210334132 | + | G | G |
| 3  | 113514754 | 113514754 | + | C | C |
| 17 | 39594446  | 39594446  | + | C | C |
| 8  | 7718216   | 7718216   | + | G | G |
| 1  | 237824110 | 237824110 | + | G | G |
| 14 | 57051734  | 57051734  | + | C | C |
| 5  | 14390400  | 14390400  | + | T | T |
| 11 | 65113821  | 65113821  | + | C | C |
| 11 | 62762108  | 62762108  | + | G | G |
| 3  | 46724776  | 46724776  | + | G | G |
| 2  | 69708039  | 69708039  | + | G | G |
| 5  | 13769652  | 13769652  | + | C | C |
| 12 | 55357536  | 55357536  | + | G | G |
| 4  | 47625722  | 47625722  | + | G | G |
| 1  | 1638855   | 1638855   | + | G | G |
| 11 | 18231137  | 18231137  | + | T | T |
| 1  | 169524522 | 169524522 | + | A | A |
| 19 | 2396595   | 2396595   | + | G | G |
| 20 | 30602769  | 30602769  | + | G | G |
| 10 | 48438754  | 48438754  | + | G | G |
| 16 | 67942841  | 67942841  | + | C | C |
| 11 | 112020894 | 112020894 | + | A | A |

|    |           |           |   |   |   |
|----|-----------|-----------|---|---|---|
| 10 | 18331767  | 18331767  | + | G | G |
| 10 | 18689994  | 18689994  | + | G | G |
| 4  | 17827032  | 17827032  | + | G | G |
| 15 | 40916766  | 40916766  | + | A | A |
| 15 | 59784488  | 59784488  | + | C | C |
| 14 | 106066414 | 106066414 | + | G | G |
| 1  | 248366914 | 248366914 | + | C | C |
| 10 | 98362155  | 98362155  | + | C | C |
| 9  | 5126761   | 5126761   | + | G | G |
| 15 | 78475076  | 78475076  | + | G | G |
| 11 | 48134415  | 48134415  | + | C | C |
| 14 | 100361009 | 100361009 | + | C | C |
| 6  | 7584402   | 7584402   | + | G | G |
| X  | 71895959  | 71895959  | + | C | C |
| 16 | 75204219  | 75204219  | + | G | G |
| 11 | 76506804  | 76506804  | + | C | C |
| 3  | 42728062  | 42728062  | + | G | G |
| 5  | 110730466 | 110730466 | + | C | C |
| 5  | 140263334 | 140263334 | + | T | T |
| 16 | 1412667   | 1412667   | + | C | C |
| 1  | 9009420   | 9009420   | + | A | A |
| 4  | 184930433 | 184930433 | + | C | C |
| 22 | 17630549  | 17630549  | + | G | G |
| X  | 70836896  | 70836896  | + | C | C |
| 10 | 116056833 | 116056833 | + | G | G |
| 5  | 149580751 | 149580751 | + | C | C |
| 17 | 61568597  | 61568597  | + | G | G |
| 15 | 91436549  | 91436549  | + | G | G |
| 1  | 236738069 | 236738069 | + | G | G |
| 16 | 1612049   | 1612049   | + | G | G |
| 10 | 52601732  | 52601732  | + | C | C |
| 4  | 20599972  | 20599972  | + | C | C |
| 11 | 66392573  | 66392573  | + | C | C |
| 2  | 128409072 | 128409072 | + | C | C |
| 19 | 55221300  | 55221300  | + | G | G |
| 15 | 80762565  | 80762565  | + | T | T |
| 1  | 176709319 | 176709319 | + | C | C |
| 13 | 38237824  | 38237824  | + | G | G |
| 1  | 120301788 | 120301788 | + | C | C |
| 11 | 61897789  | 61897789  | + | C | C |
| 9  | 125898691 | 125898691 | + | C | C |
| 16 | 67976620  | 67976620  | + | C | C |
| 19 | 4433271   | 4433271   | + | C | C |

|    |           |           |   |   |   |
|----|-----------|-----------|---|---|---|
| 22 | 45127530  | 45127530  | + | C | C |
| 7  | 141755471 | 141755471 | + | G | G |
| 3  | 121206622 | 121206622 | + | G | G |
| 2  | 31620541  | 31620541  | + | A | A |
| 7  | 100552339 | 100552339 | + | G | G |
| 16 | 77465368  | 77465368  | + | C | C |
| 1  | 119958096 | 119958096 | + | C | C |
| 15 | 95019995  | 95019995  | + | C | C |
| 15 | 42458808  | 42458808  | + | G | G |
| 12 | 25256968  | 25256968  | + | G | G |
| 9  | 33676222  | 33676222  | + | C | C |
| 3  | 48631903  | 48631903  | + | C | C |
| 9  | 113170542 | 113170542 | + | G | G |
| 9  | 126202643 | 126202643 | + | C | C |
| 1  | 13001256  | 13001256  | + | C | C |
| 8  | 6302022   | 6302022   | + | G | G |
| 11 | 48328637  | 48328637  | + | G | G |
| 11 | 18731097  | 18731097  | + | C | C |
| 2  | 175432755 | 175432755 | + | A | A |
| 3  | 14106873  | 14106873  | + | C | C |
| 12 | 53453844  | 53453844  | + | C | C |
| 15 | 42386734  | 42386734  | + | C | C |
| 9  | 43828112  | 43828112  | + | A | A |
| 14 | 74205740  | 74205740  | + | G | G |
| 5  | 76621384  | 76621384  | + | G | G |
| 7  | 1543581   | 1543581   | + | G | G |
| X  | 73289656  | 73289656  | + | C | C |
| 1  | 155582094 | 155582094 | + | C | C |
| 2  | 206870094 | 206870094 | + | G | G |
| 7  | 40087445  | 40087445  | + | G | G |
| 19 | 3452479   | 3452479   | + | G | G |
| 12 | 79685842  | 79685842  | + | G | G |
| 6  | 139576740 | 139576740 | + | C | C |
| 8  | 27094372  | 27094372  | + | G | G |
| 1  | 151666260 | 151666260 | + | C | C |
| 3  | 52830806  | 52830806  | + | C | C |
| 2  | 50779999  | 50779999  | + | T | T |
| 7  | 99621415  | 99621415  | + | C | C |
| 2  | 172953059 | 172953059 | + | G | G |
| 11 | 67257906  | 67257906  | + | T | T |
| 10 | 37430774  | 37430774  | + | G | G |
| 9  | 134027155 | 134027155 | + | A | A |
| 8  | 120977556 | 120977556 | + | C | C |



|    |           |           |   |   |   |
|----|-----------|-----------|---|---|---|
| 3  | 183056613 | 183056613 | + | C | C |
| 17 | 62774492  | 62774492  | + | C | C |
| 19 | 1058180   | 1058180   | + | C | C |
| 16 | 72146321  | 72146321  | + | G | G |
| 6  | 25983867  | 25983867  | + | C | C |
| 10 | 101829576 | 101829576 | + | C | C |
| 2  | 78639987  | 78639987  | + | A | A |
| 8  | 110587101 | 110587101 | + | G | G |
| 14 | 67826558  | 67826558  | + | G | G |
| 7  | 100552950 | 100552950 | + | G | G |
| 4  | 103822385 | 103822385 | + | G | G |
| 16 | 20976359  | 20976359  | + | C | C |
| 3  | 52729567  | 52729567  | + | T | T |
| 11 | 71276920  | 71276920  | + | C | C |
| 7  | 141797419 | 141797419 | + | C | C |
| 1  | 164761760 | 164761760 | + | G | G |
| 9  | 124441020 | 124441020 | + | C | C |
| 11 | 4869683   | 4869683   | + | G | G |
| 12 | 54969862  | 54969862  | + | T | T |
| 19 | 50169977  | 50169977  | + | C | C |
| 2  | 179437637 | 179437637 | + | C | C |
| 3  | 45817417  | 45817417  | + | C | C |
| 3  | 48694496  | 48694496  | + | G | G |
| 2  | 170053428 | 170053428 | + | G | G |
| 7  | 156526939 | 156526939 | + | G | G |
| 18 | 76754696  | 76754696  | + | C | C |
| 6  | 3078134   | 3078134   | + | G | G |
| X  | 105153213 | 105153213 | + | C | C |
| 5  | 143586444 | 143586444 | + | C | C |
| 2  | 179603069 | 179603069 | + | C | C |
| 9  | 32987768  | 32987768  | + | A | A |
| 16 | 64981676  | 64981676  | + | G | G |
| 3  | 190993060 | 190993060 | + | A | A |
| 9  | 131329210 | 131329210 | + | T | T |
| 8  | 8176084   | 8176084   | + | G | G |
| X  | 133087207 | 133087207 | + | G | G |
| 11 | 16847678  | 16847678  | + | C | C |
| 1  | 150772035 | 150772035 | + | G | G |
| 14 | 35465890  | 35465890  | + | C | C |
| 2  | 29296143  | 29296143  | + | C | C |
| 9  | 125377328 | 125377328 | + | C | C |
| 2  | 237300662 | 237300662 | + | C | C |
| 7  | 142568763 | 142568763 | + | C | C |

|    |           |           |   |   |   |
|----|-----------|-----------|---|---|---|
| 9  | 137734203 | 137734203 | + | C | C |
| 9  | 69634700  | 69634700  | + | C | C |
| 2  | 241530281 | 241530281 | + | C | C |
| 1  | 64104418  | 64104418  | + | A | A |
| 3  | 195395473 | 195395473 | + | C | C |
| 15 | 51692461  | 51692461  | + | C | C |
| 16 | 67981309  | 67981309  | + | C | C |
| 5  | 70837943  | 70837943  | + | C | C |
| 1  | 161987193 | 161987193 | + | C | C |
| 9  | 109690559 | 109690559 | + | C | C |
| 14 | 68257476  | 68257476  | + | G | G |
| 14 | 63779812  | 63779812  | + | G | G |
| 11 | 6220865   | 6220865   | + | C | C |
| 11 | 92086762  | 92086762  | + | C | C |
| 11 | 5373244   | 5373244   | + | C | C |
| 4  | 140282972 | 140282972 | + | A | A |
| 1  | 248059376 | 248059376 | + | C | C |
| 5  | 162880888 | 162880888 | + | G | G |
| 19 | 42828940  | 42828940  | + | C | C |
| X  | 99956586  | 99956586  | + | C | C |
| 14 | 22670511  | 22670511  | + | C | C |
| 17 | 30621416  | 30621416  | + | G | G |
| 3  | 122002795 | 122002795 | + | C | C |
| 21 | 30724017  | 30724017  | + | C | C |
| 19 | 32844671  | 32844671  | + | G | G |
| 12 | 6881952   | 6881952   | + | A | A |
| 8  | 97270589  | 97270589  | + | T | T |
| 1  | 104162494 | 104162494 | + | G | G |
| 12 | 93192839  | 93192839  | + | T | T |
| 1  | 228112024 | 228112024 | + | C | C |
| 7  | 2281855   | 2281855   | + | C | C |
| 12 | 8975814   | 8975814   | + | C | C |
| 15 | 49659772  | 49659772  | + | G | G |
| 1  | 197704893 | 197704893 | + | G | G |
| 18 | 28972154  | 28972154  | + | G | G |
| 14 | 22251447  | 22251447  | + | G | G |
| 18 | 55274822  | 55274822  | + | G | G |
| 1  | 43917304  | 43917304  | + | G | G |
| 19 | 17007061  | 17007061  | + | C | C |
| 3  | 195481181 | 195481181 | + | G | G |
| 21 | 17912224  | 17912224  | + | C | C |
| 5  | 41004982  | 41004982  | + | C | C |
| 18 | 44560293  | 44560293  | + | G | G |

|    |           |           |   |   |   |
|----|-----------|-----------|---|---|---|
| 19 | 50949197  | 50949197  | + | G | G |
| 1  | 145557078 | 145557078 | + | C | C |
| 17 | 3539494   | 3539494   | + | G | G |
| 14 | 65239589  | 65239589  | + | G | G |
| 9  | 8528596   | 8528596   | + | C | C |
| 5  | 167630776 | 167630776 | + | G | G |
| 7  | 143632811 | 143632811 | + | C | C |
| 14 | 101434449 | 101434449 | + | G | G |
| 7  | 4169515   | 4169515   | + | C | C |
| 9  | 5746005   | 5746005   | + | C | C |
| 9  | 123770744 | 123770744 | + | C | C |
| 19 | 51983898  | 51983898  | + | G | G |
| 3  | 49200908  | 49200908  | + | C | C |
| 10 | 50835752  | 50835752  | + | C | C |
| 17 | 6406889   | 6406889   | + | C | C |
| 8  | 17731898  | 17731898  | + | C | C |
| 1  | 215916573 | 215916573 | + | C | C |
| 3  | 126226620 | 126226620 | + | C | C |
| X  | 92965061  | 92965061  | + | C | C |
| 8  | 57079108  | 57079108  | + | G | G |
| 4  | 75937982  | 75937982  | + | G | G |
| 20 | 50405505  | 50405505  | + | G | G |
| 3  | 172835470 | 172835470 | + | G | G |
| 3  | 38622851  | 38622851  | + | G | G |
| 15 | 62540660  | 62540660  | + | C | C |
| 21 | 43863381  | 43863381  | + | G | G |
| 16 | 20635471  | 20635471  | + | C | C |
| MT | 5979      | 5979      | + | G | G |
| 10 | 124352006 | 124352006 | + | G | G |
| 5  | 23509073  | 23509073  | + | G | G |
| 5  | 178139663 | 178139663 | + | C | C |
| 19 | 11762472  | 11762472  | + | C | C |
| 8  | 54963582  | 54963582  | + | G | G |
| 10 | 84745043  | 84745043  | + | G | G |
| 1  | 247264194 | 247264194 | + | A | A |
| 1  | 160011650 | 160011650 | + | C | C |
| 17 | 67102035  | 67102035  | + | G | G |
| 8  | 75233347  | 75233347  | + | G | G |
| 6  | 119324123 | 119324123 | + | G | G |
| 22 | 29454814  | 29454814  | + | C | C |
| 16 | 15808746  | 15808746  | + | C | C |
| 3  | 122056426 | 122056426 | + | G | G |
| 7  | 143047677 | 143047677 | + | C | C |

|    |           |           |   |   |   |
|----|-----------|-----------|---|---|---|
| 3  | 58516329  | 58516329  | + | C | C |
| 8  | 17406189  | 17406189  | + | C | C |
| 7  | 94057125  | 94057125  | + | C | C |
| 19 | 58441838  | 58441838  | + | G | G |
| 17 | 46196126  | 46196126  | + | G | G |
| 8  | 39785410  | 39785410  | + | C | C |
| 11 | 16010544  | 16010544  | + | T | T |
| 11 | 5009504   | 5009504   | + | C | C |
| 1  | 160171180 | 160171180 | + | C | C |
| 2  | 108921959 | 108921959 | + | C | C |
| 17 | 44076633  | 44076633  | + | C | C |
| 10 | 72631652  | 72631652  | + | T | T |
| 14 | 92436104  | 92436104  | + | G | G |
| 3  | 14941937  | 14941937  | + | C | C |
| 5  | 83239095  | 83239095  | + | C | C |
| 14 | 74531758  | 74531758  | + | G | G |
| 11 | 59415385  | 59415385  | + | G | G |
| 1  | 117127247 | 117127247 | + | T | T |
| 13 | 41706572  | 41706572  | + | G | G |
| 19 | 44156455  | 44156455  | + | C | C |
| 4  | 107845263 | 107845263 | + | G | G |
| 1  | 178490060 | 178490060 | + | G | G |
| 2  | 108626719 | 108626719 | + | G | G |
| 17 | 67517325  | 67517325  | + | C | C |
| 19 | 39421416  | 39421416  | + | C | C |
| 17 | 56247879  | 56247879  | + | C | C |
| 2  | 199011742 | 199011742 | + | C | C |
| 10 | 69672394  | 69672394  | + | T | T |
| 11 | 56057864  | 56057864  | + | C | C |
| 4  | 100845888 | 100845888 | + | G | G |
| 5  | 1212512   | 1212512   | + | C | C |
| 5  | 160721115 | 160721115 | + | G | G |
| 7  | 142124340 | 142124340 | + | C | C |
| 1  | 248551670 | 248551670 | + | C | C |
| 7  | 94051248  | 94051248  | + | G | G |
| 2  | 55433406  | 55433406  | + | C | C |
| 4  | 154557689 | 154557689 | + | C | C |
| 15 | 79051630  | 79051630  | + | G | G |
| 12 | 52471042  | 52471042  | + | G | G |
| 10 | 15821005  | 15821005  | + | G | G |
| 11 | 34097932  | 34097932  | + | G | G |
| 11 | 124440137 | 124440137 | + | G | G |
| X  | 92927935  | 92927935  | + | G | G |

|    |           |           |   |   |   |
|----|-----------|-----------|---|---|---|
| 1  | 157648425 | 157648425 | + | G | G |
| 15 | 71433881  | 71433881  | + | C | C |
| 3  | 19975054  | 19975054  | + | C | C |
| 2  | 1653107   | 1653107   | + | G | G |
| 12 | 118105358 | 118105358 | + | G | G |
| 17 | 79250899  | 79250899  | + | G | G |
| 12 | 50185791  | 50185791  | + | G | G |
| 15 | 63097849  | 63097849  | + | C | C |
| 3  | 69987151  | 69987151  | + | C | C |
| 1  | 97278384  | 97278384  | + | G | G |
| 17 | 11515603  | 11515603  | + | G | G |
| 12 | 13828766  | 13828766  | + | C | C |
| 20 | 29960706  | 29960706  | + | G | G |
| 12 | 7188449   | 7188449   | + | T | T |
| 3  | 161214750 | 161214750 | + | C | C |
| 2  | 239013412 | 239013412 | + | C | C |
| 1  | 67206953  | 67206953  | + | A | A |
| 11 | 14853304  | 14853304  | + | C | C |
| 19 | 6678280   | 6678280   | + | A | A |
| 6  | 39272406  | 39272406  | + | C | C |
| 10 | 91067096  | 91067096  | + | C | C |
| 17 | 73759444  | 73759444  | + | G | G |
| 1  | 31897563  | 31897563  | + | C | C |
| 5  | 89943545  | 89943545  | + | G | G |
| 3  | 52426986  | 52426986  | + | C | C |
| 2  | 79363032  | 79363032  | + | G | G |
| 1  | 232649901 | 232649901 | + | G | G |
| 1  | 213446106 | 213446106 | + | T | T |
| 3  | 111887802 | 111887802 | + | G | G |
| 12 | 71928942  | 71928942  | + | A | A |
| 14 | 74967686  | 74967686  | + | G | G |
| 18 | 52262285  | 52262285  | + | G | G |
| 20 | 44576345  | 44576345  | + | G | G |
| 2  | 125281932 | 125281932 | + | G | G |
| 17 | 7663244   | 7663244   | + | C | C |
| 17 | 18022428  | 18022428  | + | C | C |
| 7  | 4899616   | 4899616   | + | G | G |
| 3  | 121825089 | 121825089 | + | G | G |
| 4  | 47527634  | 47527634  | + | G | G |
| 11 | 57958310  | 57958310  | + | C | C |
| 12 | 54969864  | 54969864  | + | C | C |
| 5  | 140474995 | 140474995 | + | G | G |
| 15 | 93015444  | 93015444  | + | G | G |

|    |           |           |   |   |   |
|----|-----------|-----------|---|---|---|
| 19 | 55112240  | 55112240  | + | G | G |
| 2  | 203075477 | 203075477 | + | T | T |
| 1  | 109268515 | 109268515 | + | C | C |
| 16 | 11051740  | 11051740  | + | G | G |
| 12 | 91502351  | 91502351  | + | G | G |
| 11 | 75115555  | 75115555  | + | C | C |
| 21 | 32493017  | 32493017  | + | C | C |
| 7  | 93515966  | 93515966  | + | G | G |
| 19 | 58152822  | 58152822  | + | G | G |
| 1  | 207195922 | 207195922 | + | G | G |
| 17 | 59556140  | 59556140  | + | G | G |
| 10 | 115661496 | 115661496 | + | C | C |
| 17 | 10351981  | 10351981  | + | G | G |
| 1  | 42046921  | 42046921  | + | G | G |
| 11 | 66460773  | 66460773  | + | G | G |
| 10 | 73556805  | 73556805  | + | A | A |
| 3  | 48694495  | 48694495  | + | G | G |
| 16 | 1869143   | 1869143   | + | C | C |
| 11 | 60668774  | 60668774  | + | G | G |
| 15 | 41819798  | 41819798  | + | G | G |
| 7  | 2959218   | 2959218   | + | C | C |
| 12 | 13715567  | 13715567  | + | G | G |
| 14 | 106791099 | 106791099 | + | C | C |
| 5  | 110818466 | 110818466 | + | G | G |
| 16 | 15808747  | 15808747  | + | C | C |
| 20 | 60895811  | 60895811  | + | G | G |
| 1  | 1638854   | 1638854   | + | G | G |
| 12 | 48961662  | 48961662  | + | G | G |
| 1  | 176668237 | 176668237 | + | G | G |
| 3  | 52304799  | 52304799  | + | T | T |
| 5  | 135610523 | 135610523 | + | G | G |
| 7  | 39247022  | 39247022  | + | C | C |
| 20 | 420964    | 420964    | + | G | G |
| 11 | 20948960  | 20948960  | + | G | G |
| 2  | 42936118  | 42936118  | + | C | C |
| 16 | 2334315   | 2334315   | + | G | G |
| 21 | 37537132  | 37537132  | + | G | G |
| 7  | 149490474 | 149490474 | + | C | C |
| 20 | 744587    | 744587    | + | C | C |
| 12 | 70913974  | 70913974  | + | C | C |
| 14 | 91755687  | 91755687  | + | C | C |
| 8  | 24171052  | 24171052  | + | G | G |
| 19 | 57336118  | 57336118  | + | C | C |

|            |           |           |   |   |   |
|------------|-----------|-----------|---|---|---|
| 17         | 7239907   | 7239907   | + | A | A |
| 7          | 99227605  | 99227605  | + | C | C |
| 10         | 118236829 | 118236829 | + | T | T |
| 11         | 63175679  | 63175679  | + | C | C |
| 1          | 118523923 | 118523923 | + | G | G |
| 16         | 19083426  | 19083426  | + | C | C |
| 19         | 1978932   | 1978932   | + | C | C |
| 11         | 6452421   | 6452421   | + | G | G |
| 21         | 41427665  | 41427665  | + | C | C |
| 10         | 105362413 | 105362413 | + | G | G |
| 1          | 245865790 | 245865790 | + | C | C |
| 3          | 136240179 | 136240179 | + | G | G |
| 12         | 40020054  | 40020054  | + | G | G |
| X          | 48681487  | 48681487  | + | C | C |
| 3          | 42679450  | 42679450  | + | G | G |
| 2          | 215279122 | 215279122 | + | C | C |
| 20         | 2290833   | 2290833   | + | C | C |
| 11         | 4944897   | 4944897   | + | G | G |
| 9          | 139368725 | 139368725 | + | G | G |
| 19         | 56658269  | 56658269  | + | C | C |
| 22         | 16279208  | 16279208  | + | C | C |
| 17         | 74383617  | 74383617  | + | C | C |
| 14         | 57051735  | 57051735  | + | C | C |
| GL000193.1 | 88239     | 88239     | + | C | C |
| 1          | 155449519 | 155449519 | + | C | C |
| 19         | 56243853  | 56243853  | + | G | G |
| 1          | 104108078 | 104108078 | + | G | G |
| 2          | 103128689 | 103128689 | + | G | G |
| 1          | 150255889 | 150255889 | + | C | C |
| 20         | 377028    | 377028    | + | C | C |
| 19         | 10127818  | 10127818  | + | C | C |
| 12         | 50188705  | 50188705  | + | G | G |
| 15         | 83455283  | 83455283  | + | C | C |
| 5          | 68524122  | 68524122  | + | C | C |
| 10         | 7618599   | 7618599   | + | C | C |
| 21         | 38103382  | 38103382  | + | G | G |
| 10         | 113928635 | 113928635 | + | A | A |
| 20         | 31825942  | 31825942  | + | G | G |
| 22         | 29957621  | 29957621  | + | G | G |
| 10         | 49409317  | 49409317  | + | C | C |
| 14         | 100361008 | 100361008 | + | C | C |
| 16         | 89619511  | 89619511  | + | C | C |
| 8          | 10396050  | 10396050  | + | T | T |

|    |           |           |   |   |   |
|----|-----------|-----------|---|---|---|
| 4  | 164534525 | 164534525 | + | C | C |
| 2  | 160268948 | 160268948 | + | C | C |
| 5  | 149497366 | 149497366 | + | G | G |
| 11 | 57466130  | 57466130  | + | C | C |
| 15 | 77321896  | 77321896  | + | G | G |
| 15 | 91358526  | 91358526  | + | T | T |
| 15 | 24923135  | 24923135  | + | G | G |
| X  | 153197729 | 153197729 | + | C | C |
| 1  | 205027723 | 205027723 | + | G | G |
| 14 | 22205159  | 22205159  | + | G | G |
| 6  | 44221487  | 44221487  | + | T | T |
| 1  | 109810236 | 109810236 | + | C | C |
| 11 | 62902198  | 62902198  | + | G | G |
| 1  | 1225880   | 1225880   | + | C | C |
| 7  | 143453536 | 143453536 | + | C | C |
| 22 | 24621309  | 24621309  | + | G | G |
| 19 | 44384270  | 44384270  | + | C | C |
| 2  | 27550915  | 27550915  | + | C | C |
| 19 | 9068525   | 9068525   | + | C | C |
| 12 | 55726293  | 55726293  | + | G | G |
| 3  | 39453210  | 39453210  | + | C | C |
| 7  | 90492555  | 90492555  | + | G | G |
| 17 | 27381703  | 27381703  | + | G | G |
| 5  | 111570402 | 111570402 | + | C | C |
| 1  | 167741525 | 167741525 | + | C | C |
| 2  | 152293798 | 152293798 | + | C | C |
| X  | 10180617  | 10180617  | + | C | C |
| X  | 130408057 | 130408057 | + | C | C |
| 13 | 23914282  | 23914282  | + | A | A |
| 16 | 30594624  | 30594624  | + | T | T |
| 11 | 35489596  | 35489596  | + | T | T |
| 2  | 71839932  | 71839932  | + | C | C |
| 6  | 75851845  | 75851845  | + | G | G |
| 1  | 180062273 | 180062273 | + | C | C |
| 1  | 44878253  | 44878253  | + | G | G |
| 2  | 190636345 | 190636345 | + | C | C |
| 9  | 125273548 | 125273548 | + | C | C |
| 2  | 1133344   | 1133344   | + | T | T |
| 12 | 113312937 | 113312937 | + | C | C |
| 17 | 26093584  | 26093584  | + | A | A |
| 11 | 67375937  | 67375937  | + | G | G |
| 4  | 178274786 | 178274786 | + | C | C |
| 14 | 81743790  | 81743790  | + | C | C |



|    |           |           |   |   |   |
|----|-----------|-----------|---|---|---|
| 19 | 36501383  | 36501383  | + | C | C |
| X  | 108868027 | 108868027 | + | C | C |
| 1  | 229773923 | 229773923 | + | C | C |
| 1  | 15959999  | 15959999  | + | C | C |
| 12 | 21428330  | 21428330  | + | C | C |
| 1  | 120384082 | 120384082 | + | C | C |
| 11 | 55563203  | 55563203  | + | C | C |
| 12 | 101555799 | 101555799 | + | C | C |
| 5  | 140531337 | 140531337 | + | C | C |
| 11 | 62532859  | 62532859  | + | T | T |
| 19 | 51503387  | 51503387  | + | C | C |
| 11 | 102818635 | 102818635 | + | C | C |
| 6  | 88854830  | 88854830  | + | C | C |
| 3  | 97868776  | 97868776  | + | C | C |
| 3  | 38766717  | 38766717  | + | G | G |
| 8  | 144332366 | 144332366 | + | C | C |
| 15 | 50784946  | 50784946  | + | G | G |
| 2  | 50850659  | 50850659  | + | A | A |
| 19 | 39788892  | 39788892  | + | C | C |
| 19 | 8137043   | 8137043   | + | C | C |
| 5  | 19571781  | 19571781  | + | G | G |
| 19 | 5456687   | 5456687   | + | G | G |
| 2  | 196737151 | 196737151 | + | G | G |
| 17 | 38133214  | 38133214  | + | C | C |
| 5  | 147778569 | 147778569 | + | C | C |
| 3  | 122284853 | 122284853 | + | C | C |
| 5  | 140953172 | 140953172 | + | G | G |
| 15 | 48054431  | 48054431  | + | C | C |
| 15 | 42178150  | 42178150  | + | C | C |
| 19 | 51128666  | 51128666  | + | C | C |
| 3  | 49700726  | 49700726  | + | C | C |
| 8  | 110454289 | 110454289 | + | G | G |
| 17 | 79973044  | 79973044  | + | G | G |
| 17 | 54403689  | 54403689  | + | C | C |
| 11 | 5566159   | 5566159   | + | C | C |
| 8  | 39780091  | 39780091  | + | C | C |
| 19 | 13910675  | 13910675  | + | C | C |
| 1  | 37270474  | 37270474  | + | T | T |
| 1  | 75039023  | 75039023  | + | C | C |
| 7  | 150163921 | 150163921 | + | G | G |
| 17 | 10399630  | 10399630  | + | G | G |
| 8  | 139164791 | 139164791 | + | G | G |
| 22 | 50480181  | 50480181  | + | G | G |

|    |           |           |   |   |   |
|----|-----------|-----------|---|---|---|
| 19 | 55494375  | 55494375  | + | T | T |
| 6  | 43164094  | 43164094  | + | C | C |
| 15 | 102516581 | 102516581 | + | C | C |
| 12 | 8205521   | 8205521   | + | C | C |
| 19 | 44661013  | 44661013  | + | C | C |
| 6  | 44217832  | 44217832  | + | C | C |
| 1  | 160518106 | 160518106 | + | C | C |
| 19 | 9086531   | 9086531   | + | A | A |
| 10 | 55581920  | 55581920  | + | C | C |
| 2  | 167143080 | 167143080 | + | C | C |
| 1  | 68564506  | 68564506  | + | G | G |
| 4  | 1107220   | 1107220   | + | G | G |
| 19 | 58018291  | 58018291  | + | A | A |
| 18 | 29052690  | 29052690  | + | A | A |
| 1  | 200959443 | 200959443 | + | G | G |
| 2  | 206562386 | 206562386 | + | C | C |
| 17 | 38643425  | 38643425  | + | C | C |
| 4  | 144922338 | 144922338 | + | C | C |
| 15 | 25456870  | 25456870  | + | C | C |
| 6  | 136475217 | 136475217 | + | G | G |
| 3  | 73114634  | 73114634  | + | A | A |
| 5  | 32000311  | 32000311  | + | C | C |
| 3  | 182871469 | 182871469 | + | C | C |
| 11 | 57258778  | 57258778  | + | G | G |
| 16 | 71609709  | 71609709  | + | C | C |
| 11 | 1096509   | 1096509   | + | C | C |
| 20 | 60905894  | 60905894  | + | C | C |
| X  | 135498853 | 135498853 | + | A | A |
| 22 | 40825752  | 40825752  | + | G | G |
| 19 | 30936285  | 30936285  | + | G | G |
| 13 | 19999122  | 19999122  | + | G | G |
| 12 | 88486457  | 88486457  | + | C | C |
| 8  | 87655995  | 87655995  | + | C | C |
| 1  | 47365968  | 47365968  | + | G | G |
| 20 | 61513517  | 61513517  | + | G | G |
| 1  | 44386519  | 44386519  | + | C | C |
| 2  | 47403710  | 47403710  | + | C | C |
| 6  | 25776873  | 25776873  | + | C | C |
| 1  | 164816032 | 164816032 | + | A | A |
| 2  | 15601404  | 15601404  | + | G | G |
| 7  | 21726815  | 21726815  | + | G | G |
| 2  | 228497978 | 228497978 | + | G | G |
| 3  | 151154637 | 151154637 | + | G | G |

|    |           |           |   |   |   |
|----|-----------|-----------|---|---|---|
| 6  | 4060868   | 4060868   | + | C | C |
| 10 | 102689180 | 102689180 | + | C | C |
| 9  | 107288587 | 107288587 | + | C | C |
| 1  | 160313076 | 160313076 | + | G | G |
| 2  | 28763273  | 28763273  | + | C | C |
| 19 | 52505130  | 52505130  | + | G | G |
| 11 | 92533316  | 92533316  | + | C | C |
| 7  | 151932996 | 151932996 | + | C | C |
| 17 | 54428238  | 54428238  | + | C | C |
| 3  | 160958936 | 160958936 | + | C | C |
| 8  | 124658036 | 124658036 | + | G | G |
| 5  | 154173499 | 154173499 | + | C | C |
| 1  | 156509267 | 156509267 | + | G | G |
| 19 | 48343192  | 48343192  | + | G | G |
| X  | 72433935  | 72433935  | + | C | C |
| 19 | 37488577  | 37488577  | + | C | C |
| 14 | 79933650  | 79933650  | + | C | C |
| 19 | 53887315  | 53887315  | + | T | T |
| 19 | 38865197  | 38865197  | + | C | C |
| 2  | 179600530 | 179600530 | + | C | C |
| 9  | 14717     | 14717     | + | G | G |
| 5  | 26890841  | 26890841  | + | C | C |
| 20 | 41306568  | 41306568  | + | C | C |
| 22 | 46125372  | 46125372  | + | C | C |
| 8  | 101299991 | 101299991 | + | G | G |
| 19 | 43575952  | 43575952  | + | G | G |
| 2  | 44079757  | 44079757  | + | A | A |
| 4  | 9784956   | 9784956   | + | G | G |
| 1  | 235969809 | 235969809 | + | G | G |
| 2  | 185463785 | 185463785 | + | G | G |
| 7  | 114270000 | 114270000 | + | G | G |
| 1  | 200878437 | 200878437 | + | C | C |
| 19 | 11728767  | 11728767  | + | C | C |
| 3  | 27436083  | 27436083  | + | G | G |
| 21 | 43710193  | 43710193  | + | G | G |
| 5  | 13793727  | 13793727  | + | G | G |
| X  | 154741371 | 154741371 | + | G | G |
| 1  | 115256530 | 115256530 | + | G | G |
| 8  | 133196508 | 133196508 | + | C | C |
| 11 | 60561549  | 60561549  | + | G | G |
| 8  | 24359025  | 24359025  | + | G | G |
| 13 | 45911670  | 45911670  | + | G | G |
| 10 | 81701789  | 81701789  | + | C | C |

|    |           |           |   |   |   |
|----|-----------|-----------|---|---|---|
| 3  | 129034497 | 129034497 | + | C | C |
| X  | 48325217  | 48325217  | + | G | G |
| 19 | 50548750  | 50548750  | + | C | C |
| 13 | 58208616  | 58208616  | + | C | C |
| X  | 110492264 | 110492264 | + | C | C |
| 20 | 29623129  | 29623129  | + | G | G |
| 3  | 52874449  | 52874449  | + | G | G |
| 5  | 54398474  | 54398474  | + | A | A |
| 5  | 140256917 | 140256917 | + | C | C |
| 7  | 141537886 | 141537886 | + | G | G |
| 9  | 84564272  | 84564272  | + | G | G |
| X  | 14748755  | 14748755  | + | G | G |
| 6  | 35930386  | 35930386  | + | C | C |
| 11 | 1619590   | 1619590   | + | T | T |
| 19 | 22363292  | 22363292  | + | C | C |
| 2  | 49190386  | 49190386  | + | G | G |
| 11 | 67926348  | 67926348  | + | G | G |
| 21 | 11098912  | 11098912  | + | G | G |
| 13 | 38211679  | 38211679  | + | C | C |
| 10 | 95790669  | 95790669  | + | G | G |
| 19 | 43689227  | 43689227  | + | G | G |
| 12 | 11546665  | 11546665  | + | C | C |
| 3  | 138403593 | 138403593 | + | G | G |
| X  | 118763259 | 118763259 | + | C | C |
| X  | 37028775  | 37028775  | + | G | G |
| 1  | 115218621 | 115218621 | + | A | A |
| X  | 140984599 | 140984599 | + | C | C |
| X  | 152936426 | 152936426 | + | C | C |
| 3  | 16640017  | 16640017  | + | A | A |
| 7  | 89793862  | 89793862  | + | A | A |
| X  | 70516711  | 70516711  | + | C | C |
| 6  | 38794029  | 38794029  | + | G | G |
| 13 | 99630086  | 99630086  | + | C | C |
| 17 | 18210404  | 18210404  | + | G | G |
| 10 | 37508120  | 37508120  | + | G | G |
| 17 | 12893374  | 12893374  | + | G | G |
| 2  | 179588843 | 179588843 | + | C | C |
| 16 | 1272880   | 1272880   | + | C | C |
| 7  | 64388850  | 64388850  | + | G | G |
| 16 | 72153167  | 72153167  | + | G | G |
| 4  | 108574751 | 108574751 | + | C | C |
| X  | 53456899  | 53456899  | + | G | G |
| 19 | 51671005  | 51671005  | + | G | G |

|            |           |           |   |   |   |
|------------|-----------|-----------|---|---|---|
| 15         | 97328465  | 97328465  | + | G | G |
| 15         | 50168691  | 50168691  | + | A | A |
| 5          | 161495076 | 161495076 | + | C | C |
| 16         | 4432353   | 4432353   | + | G | G |
| 19         | 56369431  | 56369431  | + | G | G |
| GL000192.1 | 199556    | 199556    | + | G | G |
| 1          | 227192632 | 227192632 | + | G | G |
| 6          | 117246788 | 117246788 | + | C | C |
| 1          | 82416735  | 82416735  | + | G | G |
| 17         | 78403697  | 78403697  | + | G | G |
| 19         | 52217138  | 52217138  | + | G | G |
| 14         | 80328331  | 80328331  | + | G | G |
| 3          | 98216528  | 98216528  | + | G | G |
| 15         | 24924546  | 24924546  | + | C | C |
| 6          | 32037962  | 32037962  | + | G | G |
| 2          | 179516877 | 179516877 | + | C | C |
| 11         | 48267363  | 48267363  | + | C | C |
| 10         | 33143334  | 33143334  | + | C | C |
| 1          | 74929166  | 74929166  | + | C | C |
| 21         | 41423919  | 41423919  | + | G | G |
| 4          | 122853716 | 122853716 | + | C | C |
| 13         | 109318260 | 109318260 | + | C | C |
| 12         | 47471413  | 47471413  | + | C | C |
| 18         | 63477234  | 63477234  | + | G | G |
| X          | 144337662 | 144337662 | + | G | G |
| 12         | 118199117 | 118199117 | + | C | C |
| 3          | 38138204  | 38138204  | + | G | G |
| 1          | 160846417 | 160846417 | + | T | T |
| 4          | 102981392 | 102981392 | + | C | C |
| 15         | 51294907  | 51294907  | + | G | G |
| 20         | 3682173   | 3682173   | + | C | C |
| 1          | 158641953 | 158641953 | + | G | G |
| 1          | 156215889 | 156215889 | + | G | G |
| 1          | 198700765 | 198700765 | + | G | G |
| 2          | 30993305  | 30993305  | + | C | C |
| 20         | 45131119  | 45131119  | + | G | G |
| 8          | 82670850  | 82670850  | + | C | C |
| 22         | 45749929  | 45749929  | + | G | G |
| 7          | 89793978  | 89793978  | + | T | T |
| 19         | 39062859  | 39062859  | + | C | C |
| 12         | 53164875  | 53164875  | + | G | G |
| 14         | 68251784  | 68251784  | + | G | G |
| X          | 110644281 | 110644281 | + | G | G |

|    |           |           |   |   |   |
|----|-----------|-----------|---|---|---|
| 1  | 35251217  | 35251217  | + | G | G |
| 2  | 165802231 | 165802231 | + | G | G |
| 7  | 80108207  | 80108207  | + | C | C |
| 2  | 74756159  | 74756159  | + | G | G |
| 3  | 193002840 | 193002840 | + | C | C |
| 10 | 62023676  | 62023676  | + | G | G |
| 11 | 57958762  | 57958762  | + | C | C |
| 1  | 171504632 | 171504632 | + | C | C |
| 8  | 11058172  | 11058172  | + | G | G |
| 8  | 22548426  | 22548426  | + | C | C |
| 5  | 19473263  | 19473263  | + | C | C |
| 1  | 112042704 | 112042704 | + | G | G |
| 11 | 51411800  | 51411800  | + | T | T |
| 9  | 107645359 | 107645359 | + | C | C |
| 1  | 60377417  | 60377417  | + | T | T |
| 4  | 40440437  | 40440437  | + | G | G |
| 1  | 212245488 | 212245488 | + | C | C |
| 10 | 28378750  | 28378750  | + | G | G |
| 1  | 43770760  | 43770760  | + | C | C |
| 3  | 20215766  | 20215766  | + | A | A |
| 14 | 24546666  | 24546666  | + | C | C |
| 7  | 37780854  | 37780854  | + | G | G |
| 1  | 894632    | 894632    | + | G | G |
| 7  | 2641214   | 2641214   | + | C | C |
| 19 | 37368066  | 37368066  | + | C | C |
| 11 | 129991638 | 129991638 | + | G | G |
| 1  | 201618540 | 201618540 | + | C | C |
| 22 | 25289551  | 25289551  | + | T | T |
| 2  | 47596637  | 47596637  | + | C | C |
| 14 | 20502813  | 20502813  | + | G | G |
| 4  | 82058629  | 82058629  | + | G | G |
| 22 | 26291229  | 26291229  | + | G | G |
| 2  | 223554123 | 223554123 | + | C | C |
| 7  | 63726754  | 63726754  | + | C | C |
| 6  | 31996297  | 31996297  | + | G | G |
| X  | 69669319  | 69669319  | + | G | G |
| 3  | 14547142  | 14547142  | + | C | C |
| 1  | 151206869 | 151206869 | + | C | C |
| 19 | 58619216  | 58619216  | + | C | C |
| 15 | 48807652  | 48807652  | + | G | G |
| 19 | 17396570  | 17396570  | + | C | C |
| 5  | 160039647 | 160039647 | + | C | C |
| 12 | 112622846 | 112622846 | + | G | G |

|    |           |           |   |   |   |
|----|-----------|-----------|---|---|---|
| 19 | 17389959  | 17389959  | + | C | C |
| 14 | 20345323  | 20345323  | + | G | G |
| 4  | 74361103  | 74361103  | + | G | G |
| 19 | 23836483  | 23836483  | + | G | G |
| 4  | 155457665 | 155457665 | + | G | G |
| 1  | 109465146 | 109465146 | + | C | C |
| X  | 50658787  | 50658787  | + | C | C |
| 20 | 9561045   | 9561045   | + | G | G |
| 11 | 65304129  | 65304129  | + | C | C |
| 4  | 189061685 | 189061685 | + | A | A |
| 5  | 38904069  | 38904069  | + | G | G |
| X  | 107976957 | 107976957 | + | G | G |
| 12 | 11506570  | 11506570  | + | C | C |
| 12 | 117723056 | 117723056 | + | C | C |
| 3  | 57913124  | 57913124  | + | C | C |
| 12 | 14706316  | 14706316  | + | G | G |
| 12 | 80222183  | 80222183  | + | G | G |
| 3  | 108147701 | 108147701 | + | G | G |
| 14 | 24617044  | 24617044  | + | C | C |
| 18 | 76754428  | 76754428  | + | G | G |
| 7  | 91730277  | 91730277  | + | G | G |
| 4  | 23815322  | 23815322  | + | G | G |
| 1  | 16535271  | 16535271  | + | C | C |
| 9  | 18680327  | 18680327  | + | G | G |
| 9  | 68414181  | 68414181  | + | G | G |
| 14 | 101533134 | 101533134 | + | G | G |
| 11 | 56185408  | 56185408  | + | G | G |
| 17 | 48913317  | 48913317  | + | C | C |
| 7  | 124116534 | 124116534 | + | G | G |
| 6  | 84269846  | 84269846  | + | C | C |
| 1  | 78326966  | 78326966  | + | G | G |
| 4  | 121742355 | 121742355 | + | G | G |
| 15 | 79092703  | 79092703  | + | G | G |
| 19 | 51378089  | 51378089  | + | C | C |
| 19 | 42828954  | 42828954  | + | C | C |
| 13 | 36410199  | 36410199  | + | A | A |
| 4  | 141789503 | 141789503 | + | G | G |
| 5  | 55247314  | 55247314  | + | G | G |
| 12 | 50291769  | 50291769  | + | C | C |
| X  | 153997568 | 153997568 | + | G | G |
| 3  | 88205960  | 88205960  | + | C | C |
| X  | 112021879 | 112021879 | + | G | G |
| 3  | 48689873  | 48689873  | + | G | G |

|    |           |           |   |   |   |
|----|-----------|-----------|---|---|---|
| 22 | 36123214  | 36123214  | + | C | C |
| 1  | 248085189 | 248085189 | + | G | G |
| 19 | 42828953  | 42828953  | + | C | C |
| 3  | 62631435  | 62631435  | + | C | C |
| 20 | 30602799  | 30602799  | + | G | G |
| 2  | 55562250  | 55562250  | + | G | G |
| 2  | 1926545   | 1926545   | + | A | A |
| 7  | 27194521  | 27194521  | + | C | C |
| 16 | 30096448  | 30096448  | + | C | C |
| 11 | 124134777 | 124134777 | + | A | A |
| 12 | 69747120  | 69747120  | + | G | G |
| 19 | 40542039  | 40542039  | + | G | G |
| 19 | 16926195  | 16926195  | + | C | C |
| 1  | 197169391 | 197169391 | + | C | C |
| 13 | 75813360  | 75813360  | + | G | G |
| 20 | 18395154  | 18395154  | + | G | G |
| 21 | 47424404  | 47424404  | + | C | C |
| 18 | 74091169  | 74091169  | + | C | C |
| 4  | 6925241   | 6925241   | + | C | C |
| 16 | 78005775  | 78005775  | + | A | A |
| 5  | 79616257  | 79616257  | + | G | G |
| X  | 1471279   | 1471279   | + | C | C |
| 1  | 248202452 | 248202452 | + | G | G |
| 5  | 115336356 | 115336356 | + | G | G |
| 10 | 55582559  | 55582559  | + | C | C |
| 11 | 1651363   | 1651363   | + | G | G |
| 6  | 152779913 | 152779913 | + | G | G |
| 19 | 5867503   | 5867503   | + | G | G |
| X  | 127185237 | 127185237 | + | C | C |
| 8  | 61654317  | 61654317  | + | C | C |
| 16 | 836064    | 836064    | + | G | G |
| 11 | 55433330  | 55433330  | + | G | G |
| 12 | 4736271   | 4736271   | + | C | C |
| 10 | 37508802  | 37508802  | + | G | G |
| 19 | 9071593   | 9071593   | + | G | G |
| 5  | 135287077 | 135287077 | + | G | G |
| 3  | 38647489  | 38647489  | + | C | C |
| 3  | 10136015  | 10136015  | + | C | C |
| 17 | 38938746  | 38938746  | + | G | G |
| 1  | 17685816  | 17685816  | + | G | G |
| 1  | 248685648 | 248685648 | + | G | G |
| MT | 6491      | 6491      | + | C | C |
| 12 | 11546848  | 11546848  | + | C | C |



|    |           |           |   |   |   |
|----|-----------|-----------|---|---|---|
| 9  | 116059852 | 116059852 | + | G | G |
| 3  | 187003734 | 187003734 | + | G | G |
| 12 | 50232964  | 50232964  | + | G | G |
| 5  | 151271953 | 151271953 | + | G | G |
| 4  | 91760143  | 91760143  | + | G | G |
| 12 | 69764690  | 69764690  | + | T | T |
| 8  | 6681162   | 6681162   | + | G | G |
| 6  | 27218470  | 27218470  | + | A | A |
| 7  | 56007075  | 56007075  | + | A | A |
| 1  | 98164975  | 98164975  | + | G | G |
| 2  | 155555207 | 155555207 | + | A | A |
| X  | 63551434  | 63551434  | + | C | C |
| X  | 141291651 | 141291651 | + | G | G |
| 12 | 25348149  | 25348149  | + | C | C |
| 2  | 235951357 | 235951357 | + | C | C |
| 11 | 106558342 | 106558342 | + | G | G |
| 19 | 16204528  | 16204528  | + | T | T |
| 1  | 119925599 | 119925599 | + | C | C |
| 10 | 96534946  | 96534946  | + | C | C |
| 6  | 53135414  | 53135414  | + | G | G |
| 14 | 75179879  | 75179879  | + | G | G |
| 19 | 15989644  | 15989644  | + | C | C |
| 19 | 48533782  | 48533782  | + | G | G |
| 15 | 102304723 | 102304723 | + | G | G |
| 19 | 23926957  | 23926957  | + | A | A |
| 19 | 35790611  | 35790611  | + | G | G |
| 16 | 33784761  | 33784761  | + | C | C |
| 2  | 234894441 | 234894441 | + | C | C |
| 12 | 109509426 | 109509426 | + | G | G |
| 18 | 50278496  | 50278496  | + | G | G |
| 8  | 10480283  | 10480283  | + | G | G |
| 10 | 66586254  | 66586254  | + | G | G |
| 1  | 11086743  | 11086743  | + | C | C |
| 1  | 160164882 | 160164882 | + | C | C |
| 6  | 31938900  | 31938900  | + | G | G |
| X  | 119037322 | 119037322 | + | G | G |
| 1  | 205277199 | 205277199 | + | G | G |
| 2  | 179597404 | 179597404 | + | G | G |
| 18 | 28711463  | 28711463  | + | C | C |
| X  | 47271914  | 47271914  | + | G | G |
| 4  | 24531302  | 24531302  | + | G | G |
| 20 | 2843460   | 2843460   | + | C | C |
| 17 | 12860049  | 12860049  | + | G | G |

|    |           |           |   |   |   |
|----|-----------|-----------|---|---|---|
| 10 | 5436348   | 5436348   | + | G | G |
| 1  | 158517845 | 158517845 | + | G | G |
| 17 | 41020425  | 41020425  | + | C | C |
| 10 | 101464378 | 101464378 | + | C | C |
| 14 | 71575355  | 71575355  | + | C | C |
| 1  | 36358180  | 36358180  | + | C | C |
| 4  | 106374782 | 106374782 | + | C | C |
| 11 | 60538918  | 60538918  | + | C | C |
| 5  | 154173500 | 154173500 | + | T | T |
| 5  | 141334676 | 141334676 | + | C | C |
| 19 | 53793970  | 53793970  | + | C | C |
| 1  | 118523917 | 118523917 | + | C | C |
| 1  | 67359071  | 67359071  | + | A | A |
| 8  | 65517283  | 65517283  | + | G | G |
| 11 | 68154023  | 68154023  | + | G | G |
| 5  | 140750052 | 140750052 | + | G | G |
| 14 | 70713045  | 70713045  | + | G | G |
| 1  | 32849517  | 32849517  | + | G | G |
| 19 | 14720980  | 14720980  | + | G | G |
| 15 | 23890790  | 23890790  | + | C | C |
| X  | 2933131   | 2933131   | + | C | C |
| 9  | 88842265  | 88842265  | + | G | G |
| X  | 73751238  | 73751238  | + | G | G |
| 17 | 11593538  | 11593538  | + | G | G |
| 6  | 144178260 | 144178260 | + | C | C |
| 7  | 151815792 | 151815792 | + | G | G |
| X  | 69479057  | 69479057  | + | G | G |
| 20 | 77112     | 77112     | + | C | C |
| 19 | 11687971  | 11687971  | + | G | G |
| 20 | 2464479   | 2464479   | + | G | G |
| 13 | 107210083 | 107210083 | + | G | G |
| 8  | 17228664  | 17228664  | + | G | G |
| 19 | 6921774   | 6921774   | + | G | G |
| 10 | 75289918  | 75289918  | + | G | G |
| 7  | 25175830  | 25175830  | + | A | A |
| 9  | 116176057 | 116176057 | + | C | C |
| 12 | 120127975 | 120127975 | + | G | G |
| 17 | 36872693  | 36872693  | + | C | C |
| 19 | 4504422   | 4504422   | + | C | C |
| 14 | 28733956  | 28733956  | + | G | G |
| 1  | 26516195  | 26516195  | + | C | C |
| 12 | 123186976 | 123186976 | + | C | C |
| 10 | 37506704  | 37506704  | + | C | C |

|    |           |           |   |   |   |
|----|-----------|-----------|---|---|---|
| 11 | 72307673  | 72307673  | + | C | C |
| 8  | 41552698  | 41552698  | + | C | C |
| 3  | 46902285  | 46902285  | + | C | C |
| 13 | 50466615  | 50466615  | + | G | G |
| 8  | 24251634  | 24251634  | + | G | G |
| 11 | 93800789  | 93800789  | + | C | C |
| 10 | 94397229  | 94397229  | + | C | C |
| 14 | 62261821  | 62261821  | + | T | T |
| 14 | 24620357  | 24620357  | + | T | T |
| 5  | 90021428  | 90021428  | + | T | T |
| 9  | 125391651 | 125391651 | + | G | G |
| 13 | 46718690  | 46718690  | + | G | G |
| 12 | 104324253 | 104324253 | + | C | C |
| 13 | 99354747  | 99354747  | + | C | C |
| 11 | 119212672 | 119212672 | + | C | C |
| 19 | 17720803  | 17720803  | + | G | G |
| 21 | 42749762  | 42749762  | + | C | C |
| 7  | 53103458  | 53103458  | + | C | C |
| 17 | 61611430  | 61611430  | + | G | G |
| 16 | 69959060  | 69959060  | + | C | C |
| 1  | 152636753 | 152636753 | + | C | C |
| 7  | 128119393 | 128119393 | + | C | C |
| 4  | 91230019  | 91230019  | + | T | T |
| 2  | 87012953  | 87012953  | + | G | G |
| 21 | 41725476  | 41725476  | + | G | G |
| 19 | 16884095  | 16884095  | + | G | G |
| 7  | 136912519 | 136912519 | + | T | T |
| 19 | 9529414   | 9529414   | + | G | G |
| 19 | 38795053  | 38795053  | + | G | G |
| 14 | 95090211  | 95090211  | + | G | G |
| 5  | 50137811  | 50137811  | + | G | G |
| 7  | 100365543 | 100365543 | + | G | G |
| 12 | 54686442  | 54686442  | + | C | C |
| 2  | 231313823 | 231313823 | + | C | C |
| 19 | 55106215  | 55106215  | + | C | C |
| 19 | 20236295  | 20236295  | + | C | C |
| 12 | 55421060  | 55421060  | + | C | C |
| 1  | 119925598 | 119925598 | + | C | C |
| 17 | 3195183   | 3195183   | + | G | G |
| 11 | 59420337  | 59420337  | + | G | G |
| 5  | 42718201  | 42718201  | + | G | G |
| 1  | 169094223 | 169094223 | + | G | G |
| 6  | 144178259 | 144178259 | + | C | C |

|            |           |           |   |   |   |
|------------|-----------|-----------|---|---|---|
| 12         | 49412662  | 49412662  | + | C | C |
| 1          | 11073871  | 11073871  | + | C | C |
| 1          | 236647582 | 236647582 | + | C | C |
| 19         | 16974390  | 16974390  | + | C | C |
| 6          | 44221482  | 44221482  | + | T | T |
| 10         | 107022245 | 107022245 | + | C | C |
| 17         | 12661596  | 12661596  | + | G | G |
| 14         | 23815696  | 23815696  | + | G | G |
| 10         | 82403788  | 82403788  | + | G | G |
| 1          | 27056237  | 27056237  | + | G | G |
| 6          | 101086481 | 101086481 | + | G | G |
| 4          | 159790028 | 159790028 | + | C | C |
| 2          | 141004685 | 141004685 | + | T | T |
| 6          | 133785975 | 133785975 | + | G | G |
| 17         | 39240819  | 39240819  | + | C | C |
| 1          | 20964487  | 20964487  | + | G | G |
| 2          | 141299471 | 141299471 | + | C | C |
| 2          | 169874659 | 169874659 | + | G | G |
| 6          | 31584686  | 31584686  | + | G | G |
| 19         | 36111017  | 36111017  | + | C | C |
| 11         | 22283734  | 22283734  | + | C | C |
| 1          | 27124215  | 27124215  | + | C | C |
| 8          | 7308401   | 7308401   | + | C | C |
| 1          | 222900411 | 222900411 | + | C | C |
| 5          | 21783553  | 21783553  | + | C | C |
| 4          | 69693131  | 69693131  | + | G | G |
| X          | 153588390 | 153588390 | + | A | A |
| 19         | 57062113  | 57062113  | + | G | G |
| GL000194.1 | 68286     | 68286     | + | G | G |
| 3          | 138669480 | 138669480 | + | G | G |
| 11         | 47861819  | 47861819  | + | G | G |
| 10         | 69881684  | 69881684  | + | C | C |
| 2          | 206562370 | 206562370 | + | T | T |
| 20         | 29961011  | 29961011  | + | G | G |
| 19         | 36302875  | 36302875  | + | C | C |
| 3          | 193128849 | 193128849 | + | G | G |
| 7          | 142180629 | 142180629 | + | C | C |
| 14         | 23745722  | 23745722  | + | G | G |
| 16         | 3063316   | 3063316   | + | G | G |
| 8          | 144940444 | 144940444 | + | C | C |
| 14         | 95056882  | 95056882  | + | C | C |
| 7          | 44802973  | 44802973  | + | C | C |
| 3          | 97198165  | 97198165  | + | G | G |

|    |           |           |   |   |   |
|----|-----------|-----------|---|---|---|
| 8  | 30013854  | 30013854  | + | C | C |
| 7  | 150440227 | 150440227 | + | G | G |
| 6  | 10756937  | 10756937  | + | T | T |
| 12 | 94634431  | 94634431  | + | C | C |
| 7  | 158457388 | 158457388 | + | G | G |
| 5  | 140256919 | 140256919 | + | C | C |
| 11 | 56511119  | 56511119  | + | T | T |
| 6  | 37467688  | 37467688  | + | G | G |
| 19 | 43233450  | 43233450  | + | C | C |
| 17 | 37264503  | 37264503  | + | G | G |
| 8  | 56367529  | 56367529  | + | C | C |
| 5  | 1801533   | 1801533   | + | T | T |
| 10 | 14944468  | 14944468  | + | T | T |
| 18 | 21113440  | 21113440  | + | C | C |
| 16 | 11272418  | 11272418  | + | C | C |
| 11 | 93800788  | 93800788  | + | C | C |
| 18 | 61326468  | 61326468  | + | G | G |
| 11 | 65304145  | 65304145  | + | C | C |
| 10 | 55582728  | 55582728  | + | C | C |
| 3  | 167023632 | 167023632 | + | C | C |
| X  | 154159127 | 154159127 | + | C | C |
| 7  | 943828    | 943828    | + | G | G |
| 19 | 11728223  | 11728223  | + | C | C |
| 12 | 306558    | 306558    | + | C | C |
| 8  | 40683185  | 40683185  | + | G | G |
| 13 | 84455791  | 84455791  | + | C | C |
| 14 | 23312479  | 23312479  | + | C | C |
| 19 | 48982506  | 48982506  | + | C | C |
| 7  | 98254285  | 98254285  | + | G | G |
| 19 | 50764791  | 50764791  | + | C | C |
| 5  | 178358243 | 178358243 | + | G | G |
| 1  | 196762504 | 196762504 | + | G | G |
| 5  | 1219209   | 1219209   | + | G | G |
| 19 | 20135159  | 20135159  | + | G | G |
| 5  | 175581965 | 175581965 | + | G | G |
| 17 | 73316509  | 73316509  | + | G | G |
| 3  | 128780886 | 128780886 | + | G | G |
| 6  | 157502271 | 157502271 | + | C | C |
| 19 | 47285687  | 47285687  | + | G | G |
| 13 | 103346790 | 103346790 | + | G | G |
| 5  | 14465688  | 14465688  | + | C | C |
| 5  | 79366183  | 79366183  | + | G | G |
| 11 | 73717991  | 73717991  | + | G | G |

|    |           |           |   |   |   |
|----|-----------|-----------|---|---|---|
| X  | 83372400  | 83372400  | + | C | C |
| 16 | 2813554   | 2813554   | + | C | C |
| X  | 74670626  | 74670626  | + | G | G |
| 5  | 172386891 | 172386891 | + | C | C |
| 11 | 73008670  | 73008670  | + | C | C |
| 4  | 187004306 | 187004306 | + | G | G |
| 3  | 137742606 | 137742606 | + | G | G |
| 21 | 37620804  | 37620804  | + | A | A |
| X  | 154292345 | 154292345 | + | C | C |
| 7  | 64313435  | 64313435  | + | C | C |
| 5  | 176402449 | 176402449 | + | C | C |
| 2  | 122165235 | 122165235 | + | G | G |
| 3  | 169820685 | 169820685 | + | G | G |
| 11 | 102663365 | 102663365 | + | G | G |
| 19 | 50823876  | 50823876  | + | G | G |
| 7  | 151815793 | 151815793 | + | G | G |
| 4  | 71275322  | 71275322  | + | A | A |
| 17 | 42512485  | 42512485  | + | C | C |
| 19 | 52529012  | 52529012  | + | C | C |
| 3  | 42265116  | 42265116  | + | A | A |
| 3  | 190105895 | 190105895 | + | G | G |
| 4  | 74005789  | 74005789  | + | G | G |
| 4  | 47746513  | 47746513  | + | C | C |
| 11 | 76831875  | 76831875  | + | C | C |
| 9  | 32634619  | 32634619  | + | G | G |
| 11 | 64435933  | 64435933  | + | G | G |
| 4  | 165962730 | 165962730 | + | G | G |
| 1  | 18618479  | 18618479  | + | G | G |
| 12 | 107415917 | 107415917 | + | G | G |
| 7  | 103151358 | 103151358 | + | C | C |
| 5  | 140237070 | 140237070 | + | G | G |
| 21 | 46596197  | 46596197  | + | C | C |
| 17 | 56233231  | 56233231  | + | C | C |
| 8  | 121309813 | 121309813 | + | G | G |
| 17 | 40937162  | 40937162  | + | G | G |
| 4  | 146461023 | 146461023 | + | C | C |
| 3  | 190105896 | 190105896 | + | G | G |
| 12 | 56213150  | 56213150  | + | G | G |
| 6  | 159065732 | 159065732 | + | G | G |
| 2  | 98274990  | 98274990  | + | G | G |
| 3  | 38888492  | 38888492  | + | G | G |
| 5  | 145613117 | 145613117 | + | C | C |
| 19 | 54404000  | 54404000  | + | G | G |

|    |           |           |   |   |   |
|----|-----------|-----------|---|---|---|
| 17 | 10404754  | 10404754  | + | C | C |
| 12 | 10862602  | 10862602  | + | G | G |
| 12 | 51678573  | 51678573  | + | T | T |
| 19 | 44635359  | 44635359  | + | C | C |
| 7  | 24756825  | 24756825  | + | G | G |
| 1  | 17592200  | 17592200  | + | G | G |
| 1  | 157660164 | 157660164 | + | G | G |
| 10 | 135097386 | 135097386 | + | G | G |
| 15 | 57839850  | 57839850  | + | C | C |
| 2  | 220078669 | 220078669 | + | A | A |
| 1  | 74671072  | 74671072  | + | C | C |
| 9  | 39177420  | 39177420  | + | G | G |
| 12 | 45458993  | 45458993  | + | C | C |
| 19 | 38795052  | 38795052  | + | G | G |
| 8  | 133192557 | 133192557 | + | G | G |
| 5  | 70818679  | 70818679  | + | G | G |
| 12 | 112632801 | 112632801 | + | G | G |
| 5  | 140720011 | 140720011 | + | C | C |
| 6  | 121768740 | 121768740 | + | G | G |
| 2  | 56145040  | 56145040  | + | C | C |
| 18 | 54814847  | 54814847  | + | C | C |
| 3  | 38968334  | 38968334  | + | C | C |
| X  | 77372905  | 77372905  | + | G | G |
| 19 | 19258522  | 19258522  | + | G | G |
| 3  | 168838988 | 168838988 | + | C | C |
| 3  | 195515290 | 195515290 | + | C | C |
| 12 | 94563011  | 94563011  | + | C | C |
| 5  | 5462600   | 5462600   | + | G | G |
| X  | 63410382  | 63410382  | + | C | C |
| 7  | 18788679  | 18788679  | + | C | C |
| 15 | 25415916  | 25415916  | + | T | T |
| 1  | 75039152  | 75039152  | + | C | C |
| 1  | 159842787 | 159842787 | + | C | C |
| 2  | 179528564 | 179528564 | + | C | C |
| 15 | 34168177  | 34168177  | + | G | G |
| 20 | 62373917  | 62373917  | + | C | C |
| 19 | 52217139  | 52217139  | + | G | G |
| 9  | 14718     | 14718     | + | A | A |
| 14 | 107049117 | 107049117 | + | C | C |
| 11 | 104912207 | 104912207 | + | G | G |
| 19 | 35551028  | 35551028  | + | C | C |
| 19 | 52869596  | 52869596  | + | G | G |
| 15 | 42178151  | 42178151  | + | C | C |

|    |           |           |   |   |   |
|----|-----------|-----------|---|---|---|
| 12 | 52779191  | 52779191  | + | G | G |
| 19 | 17836784  | 17836784  | + | C | C |
| 12 | 69746941  | 69746941  | + | G | G |
| 8  | 61754240  | 61754240  | + | C | C |
| 19 | 44777912  | 44777912  | + | G | G |
| 8  | 77745637  | 77745637  | + | C | C |
| 21 | 44949591  | 44949591  | + | G | G |
| 20 | 2464480   | 2464480   | + | G | G |
| 13 | 39433451  | 39433451  | + | G | G |
| X  | 134992246 | 134992246 | + | C | C |
| 17 | 10399693  | 10399693  | + | C | C |
| 8  | 27516700  | 27516700  | + | G | G |
| 7  | 24738536  | 24738536  | + | C | C |
| 19 | 20003303  | 20003303  | + | G | G |
| 1  | 161953953 | 161953953 | + | C | C |
| 12 | 53452973  | 53452973  | + | C | C |
| 4  | 167020516 | 167020516 | + | T | T |
| 1  | 85725252  | 85725252  | + | G | G |
| X  | 151870251 | 151870251 | + | A | A |
| 17 | 39680497  | 39680497  | + | G | G |
| 7  | 64437186  | 64437186  | + | C | C |
| 2  | 29247073  | 29247073  | + | G | G |
| 3  | 190147432 | 190147432 | + | G | G |
| X  | 68748988  | 68748988  | + | C | C |
| 3  | 123987908 | 123987908 | + | C | C |
| X  | 132159668 | 132159668 | + | G | G |
| 9  | 116176058 | 116176058 | + | C | C |
| 19 | 17836783  | 17836783  | + | C | C |
| 19 | 9056598   | 9056598   | + | G | G |
| 8  | 68145135  | 68145135  | + | G | G |
| X  | 48320620  | 48320620  | + | G | G |
| 17 | 56233230  | 56233230  | + | C | C |
| 5  | 140811991 | 140811991 | + | G | G |
| 10 | 91404806  | 91404806  | + | C | C |
| 11 | 64112542  | 64112542  | + | G | G |
| 6  | 107391053 | 107391053 | + | G | G |
| 13 | 99630085  | 99630085  | + | C | C |
| 11 | 67402344  | 67402344  | + | G | G |
| X  | 118250563 | 118250563 | + | G | G |
| 17 | 74288157  | 74288157  | + | G | G |
| 19 | 5772949   | 5772949   | + | C | C |
| 12 | 47629178  | 47629178  | + | C | C |
| X  | 153631717 | 153631717 | + | G | G |



|            |           |           |   |   |   |
|------------|-----------|-----------|---|---|---|
| 16         | 28506467  | 28506467  | + | C | C |
| 5          | 151771675 | 151771675 | + | C | C |
| 8          | 41798592  | 41798592  | + | G | G |
| 8          | 7718189   | 7718189   | + | G | G |
| 17         | 78403696  | 78403696  | + | G | G |
| X          | 65253322  | 65253322  | + | G | G |
| 22         | 46615714  | 46615714  | + | C | C |
| 1          | 118574376 | 118574376 | + | C | C |
| 4          | 42965087  | 42965087  | + | G | G |
| 12         | 57345911  | 57345911  | + | C | C |
| 4          | 56874539  | 56874539  | + | C | C |
| 13         | 114748614 | 114748614 | + | G | G |
| 10         | 72532279  | 72532279  | + | C | C |
| 3          | 13543517  | 13543517  | + | C | C |
| 4          | 17528713  | 17528713  | + | C | C |
| 19         | 51363574  | 51363574  | + | C | C |
| 16         | 28509596  | 28509596  | + | G | G |
| 19         | 1584641   | 1584641   | + | G | G |
| 2          | 44099420  | 44099420  | + | G | G |
| 1          | 176758991 | 176758991 | + | G | G |
| X          | 153133550 | 153133550 | + | G | G |
| 9          | 68413581  | 68413581  | + | G | G |
| 5          | 178358242 | 178358242 | + | G | G |
| 2          | 42997093  | 42997093  | + | C | C |
| 6          | 44269164  | 44269164  | + | G | G |
| 1          | 115222330 | 115222330 | + | C | C |
| 8          | 3224645   | 3224645   | + | G | G |
| 1          | 12336013  | 12336013  | + | A | A |
| 7          | 825254    | 825254    | + | C | C |
| 7          | 43540298  | 43540298  | + | G | G |
| 14         | 70925485  | 70925485  | + | A | A |
| 19         | 44803836  | 44803836  | + | A | A |
| 12         | 58020675  | 58020675  | + | G | G |
| 17         | 17425697  | 17425697  | + | C | C |
| 6          | 76386875  | 76386875  | + | C | C |
| 7          | 154739443 | 154739443 | + | G | G |
| 21         | 30250583  | 30250583  | + | G | G |
| 9          | 34458885  | 34458885  | + | C | C |
| 5          | 140811901 | 140811901 | + | C | C |
| 3          | 167000059 | 167000059 | + | C | C |
| GL000205.1 | 118520    | 118520    | + | G | G |
| 22         | 32346305  | 32346305  | + | A | A |
| 4          | 42545968  | 42545968  | + | G | G |

|    |           |           |   |   |   |
|----|-----------|-----------|---|---|---|
| X  | 70596864  | 70596864  | + | G | G |
| 21 | 10970034  | 10970034  | + | T | T |
| 5  | 112901647 | 112901647 | + | C | C |
| X  | 99551517  | 99551517  | + | G | G |
| 8  | 55538304  | 55538304  | + | G | G |
| 5  | 55247313  | 55247313  | + | T | T |
| 1  | 3350360   | 3350360   | + | C | C |
| 2  | 132021588 | 132021588 | + | G | G |
| 21 | 36088871  | 36088871  | + | C | C |
| 19 | 9297317   | 9297317   | + | C | C |
| 12 | 113534839 | 113534839 | + | G | G |
| 3  | 41266125  | 41266125  | + | C | C |
| 20 | 33879865  | 33879865  | + | C | C |
| 17 | 79804869  | 79804869  | + | C | C |
| 3  | 78717453  | 78717453  | + | C | C |
| 20 | 33517324  | 33517324  | + | G | G |
| MT | 1603      | 1603      | + | A | A |
| 19 | 9068307   | 9068307   | + | G | G |
| 10 | 28250644  | 28250644  | + | C | C |
| 11 | 92523205  | 92523205  | + | G | G |
| 13 | 38164527  | 38164527  | + | A | A |
| 11 | 65304130  | 65304130  | + | C | C |
| 17 | 42018942  | 42018942  | + | G | G |
| 4  | 42545969  | 42545969  | + | G | G |
| 12 | 121932438 | 121932438 | + | G | G |
| 4  | 108816973 | 108816973 | + | C | C |
| 19 | 54404001  | 54404001  | + | G | G |
| 20 | 30232599  | 30232599  | + | G | G |
| 19 | 56889098  | 56889098  | + | A | A |
| 15 | 74927966  | 74927966  | + | A | A |
| 2  | 71909694  | 71909694  | + | C | C |
| 19 | 58118641  | 58118641  | + | C | C |
| 4  | 138442472 | 138442472 | + | C | C |
| 18 | 30825366  | 30825366  | + | G | G |
| 2  | 141773412 | 141773412 | + | C | C |
| 7  | 44798907  | 44798907  | + | G | G |
| 6  | 132874436 | 132874436 | + | T | T |
| 1  | 28343696  | 28343696  | + | G | G |
| 14 | 53513591  | 53513591  | + | C | C |
| 19 | 36501384  | 36501384  | + | C | C |
| 2  | 37096834  | 37096834  | + | G | G |
| 7  | 44425674  | 44425674  | + | G | G |
| 5  | 126213889 | 126213889 | + | G | G |

|    |           |           |   |   |   |
|----|-----------|-----------|---|---|---|
| 10 | 28223941  | 28223941  | + | C | C |
| MT | 6492      | 6492      | + | C | C |
| 5  | 38950815  | 38950815  | + | G | G |
| 11 | 5566278   | 5566278   | + | C | C |
| 13 | 33591083  | 33591083  | + | G | G |
| 16 | 87723910  | 87723910  | + | G | G |
| 10 | 91404807  | 91404807  | + | C | C |
| 3  | 19554501  | 19554501  | + | C | C |
| 3  | 56597891  | 56597891  | + | T | T |
| 17 | 57684454  | 57684454  | + | C | C |
| X  | 128623014 | 128623014 | + | A | A |
| 8  | 144940720 | 144940720 | + | C | C |
| 16 | 16180726  | 16180726  | + | C | C |
| 9  | 91616482  | 91616482  | + | G | G |
| 6  | 145075876 | 145075876 | + | T | T |
| 2  | 3447562   | 3447562   | + | C | C |
| 12 | 46211464  | 46211464  | + | C | C |
| 2  | 32605230  | 32605230  | + | C | C |
| 2  | 203417596 | 203417596 | + | C | C |
| 4  | 104017430 | 104017430 | + | A | A |
| 6  | 76734976  | 76734976  | + | C | C |
| 1  | 2411255   | 2411255   | + | C | C |
| 12 | 48577844  | 48577844  | + | C | C |
| 17 | 51900532  | 51900532  | + | C | C |
| 4  | 69696563  | 69696563  | + | T | T |
| 16 | 74719456  | 74719456  | + | C | C |
| 2  | 179429905 | 179429905 | + | A | A |
| 17 | 48683278  | 48683278  | + | T | T |
| 2  | 219894278 | 219894278 | + | G | G |
| 5  | 1208874   | 1208874   | + | C | C |
| 8  | 146067264 | 146067264 | + | G | G |
| 7  | 143747527 | 143747527 | + | C | C |
| 2  | 171822568 | 171822568 | + | C | C |
| 6  | 43472656  | 43472656  | + | C | C |
| 4  | 122854213 | 122854213 | + | G | G |
| 20 | 43836176  | 43836176  | + | C | C |
| 12 | 97147573  | 97147573  | + | G | G |
| 18 | 32887722  | 32887722  | + | T | T |
| 18 | 3067449   | 3067449   | + | G | G |
| 16 | 66436952  | 66436952  | + | C | C |
| 9  | 138662163 | 138662163 | + | G | G |
| 8  | 27650269  | 27650269  | + | C | C |
| 16 | 84212976  | 84212976  | + | G | G |

|    |           |           |   |   |   |
|----|-----------|-----------|---|---|---|
| 1  | 1234039   | 1234039   | + | G | G |
| 9  | 119187856 | 119187856 | + | C | C |
| 10 | 95719138  | 95719138  | + | C | C |
| 1  | 153303296 | 153303296 | + | G | G |
| 2  | 166211166 | 166211166 | + | G | G |
| 11 | 17415924  | 17415924  | + | C | C |
| 15 | 50212463  | 50212463  | + | C | C |
| 1  | 231473368 | 231473368 | + | G | G |
| 13 | 29012477  | 29012477  | + | C | C |
| 12 | 5603604   | 5603604   | + | G | G |
| 8  | 144812658 | 144812658 | + | A | A |
| 16 | 51175273  | 51175273  | + | G | G |
| 7  | 122755536 | 122755536 | + | G | G |
| 3  | 108129532 | 108129532 | + | C | C |
| 6  | 28966604  | 28966604  | + | G | G |
| 2  | 139428747 | 139428747 | + | C | C |
| 16 | 31580514  | 31580514  | + | C | C |
| 20 | 10036250  | 10036250  | + | C | C |
| 18 | 14763947  | 14763947  | + | C | C |
| 3  | 51112868  | 51112868  | + | G | G |
| 20 | 45131272  | 45131272  | + | G | G |
| 19 | 36940091  | 36940091  | + | G | G |
| 5  | 40981567  | 40981567  | + | G | G |
| 3  | 12645699  | 12645699  | + | G | G |
| 12 | 81778015  | 81778015  | + | G | G |
| 16 | 20043464  | 20043464  | + | G | G |
| 7  | 20768099  | 20768099  | + | G | G |
| 6  | 108066181 | 108066181 | + | C | C |
| 12 | 2602389   | 2602389   | + | C | C |
| 1  | 169256627 | 169256627 | + | G | G |
| 10 | 105194075 | 105194075 | + | C | C |
| 12 | 51695929  | 51695929  | + | G | G |
| 6  | 127775201 | 127775201 | + | G | G |
| 19 | 11665062  | 11665062  | + | G | G |
| 1  | 12064168  | 12064168  | + | A | A |
| 7  | 2773115   | 2773115   | + | G | G |
| 19 | 18120419  | 18120419  | + | C | C |
| 19 | 19338968  | 19338968  | + | G | G |
| 18 | 47110142  | 47110142  | + | G | G |
| 1  | 3686361   | 3686361   | + | G | G |
| 12 | 10133202  | 10133202  | + | C | C |
| 1  | 17749279  | 17749279  | + | G | G |
| 3  | 12458252  | 12458252  | + | T | T |

|            |           |           |   |   |   |
|------------|-----------|-----------|---|---|---|
| GL000219.1 | 88391     | 88391     | + | C | C |
| X          | 72667442  | 72667442  | + | C | C |
| 1          | 34112283  | 34112283  | + | G | G |
| 20         | 40713343  | 40713343  | + | C | C |
| 19         | 56515169  | 56515169  | + | C | C |
| 6          | 40400258  | 40400258  | + | G | G |
| 1          | 248039582 | 248039582 | + | G | G |
| 3          | 52940182  | 52940182  | + | G | G |
| 19         | 33517665  | 33517665  | + | C | C |
| 15         | 49574260  | 49574260  | + | C | C |
| 2          | 128477786 | 128477786 | + | G | G |
| 19         | 53770173  | 53770173  | + | G | G |
| 3          | 13916549  | 13916549  | + | C | C |
| 21         | 11049586  | 11049586  | + | G | G |
| 2          | 207613859 | 207613859 | + | G | G |
| 11         | 62484587  | 62484587  | + | G | G |
| 19         | 2878369   | 2878369   | + | G | G |
| 16         | 17232357  | 17232357  | + | G | G |
| 7          | 31014619  | 31014619  | + | G | G |
| 22         | 18027972  | 18027972  | + | G | G |
| 17         | 3366040   | 3366040   | + | T | T |
| 1          | 91851185  | 91851185  | + | C | C |
| X          | 123775641 | 123775641 | + | C | C |
| 7          | 82996860  | 82996860  | + | C | C |
| 21         | 11058213  | 11058213  | + | G | G |
| 1          | 35334324  | 35334324  | + | G | G |
| 17         | 8053425   | 8053425   | + | C | C |
| 8          | 144378583 | 144378583 | + | C | C |
| 12         | 2719805   | 2719805   | + | C | C |
| 2          | 139428949 | 139428949 | + | C | C |
| 16         | 698223    | 698223    | + | G | G |
| X          | 70147196  | 70147196  | + | C | C |
| 4          | 103808666 | 103808666 | + | C | C |
| 9          | 101148040 | 101148040 | + | G | G |
| 1          | 28857053  | 28857053  | + | C | C |
| 6          | 159146550 | 159146550 | + | G | G |
| 5          | 73163945  | 73163945  | + | C | C |
| 9          | 72521086  | 72521086  | + | G | G |
| 19         | 54301623  | 54301623  | + | G | G |
| 8          | 118159308 | 118159308 | + | G | G |
| 17         | 12666495  | 12666495  | + | C | C |
| 1          | 98164935  | 98164935  | + | C | C |
| 12         | 123900366 | 123900366 | + | G | G |

|    |           |           |   |   |   |
|----|-----------|-----------|---|---|---|
| 5  | 178556949 | 178556949 | + | C | C |
| 10 | 69748482  | 69748482  | + | C | C |
| 11 | 121174356 | 121174356 | + | C | C |
| 17 | 45904099  | 45904099  | + | G | G |
| X  | 69649801  | 69649801  | + | C | C |
| 17 | 74023239  | 74023239  | + | G | G |
| 4  | 103966100 | 103966100 | + | C | C |
| 8  | 39694732  | 39694732  | + | C | C |
| 17 | 56291740  | 56291740  | + | C | C |
| 9  | 117552789 | 117552789 | + | G | G |
| 4  | 53468114  | 53468114  | + | G | G |
| 11 | 121391549 | 121391549 | + | C | C |
| 4  | 69362447  | 69362447  | + | G | G |
| 17 | 61781160  | 61781160  | + | C | C |
| 1  | 203834217 | 203834217 | + | C | C |
| 2  | 179417214 | 179417214 | + | C | C |
| 6  | 7580776   | 7580776   | + | G | G |
| 7  | 55902117  | 55902117  | + | C | C |
| X  | 152113961 | 152113961 | + | C | C |
| 17 | 48616591  | 48616591  | + | G | G |
| 2  | 27360917  | 27360917  | + | G | G |
| 17 | 74158008  | 74158008  | + | G | G |
| 12 | 113543544 | 113543544 | + | G | G |
| 19 | 17756868  | 17756868  | + | G | G |
| 3  | 31658488  | 31658488  | + | G | G |
| 2  | 223553124 | 223553124 | + | C | C |
| 1  | 152281979 | 152281979 | + | C | C |
| 17 | 25932834  | 25932834  | + | C | C |
| 10 | 45669974  | 45669974  | + | G | G |
| 7  | 150417539 | 150417539 | + | C | C |
| 1  | 156085066 | 156085066 | + | G | G |
| 10 | 84118522  | 84118522  | + | C | C |
| 19 | 46543049  | 46543049  | + | G | G |
| 14 | 22675923  | 22675923  | + | G | G |
| 15 | 35045390  | 35045390  | + | C | C |
| 17 | 33448787  | 33448787  | + | G | G |
| 7  | 16655510  | 16655510  | + | G | G |
| 19 | 17734351  | 17734351  | + | G | G |
| 11 | 56949997  | 56949997  | + | G | G |
| 11 | 55433342  | 55433342  | + | G | G |
| 7  | 48407442  | 48407442  | + | G | G |
| 2  | 179664129 | 179664129 | + | C | C |
| 11 | 36300091  | 36300091  | + | G | G |

|    |           |           |   |   |   |
|----|-----------|-----------|---|---|---|
| 1  | 55559753  | 55559753  | + | G | G |
| 16 | 84695469  | 84695469  | + | C | C |
| 11 | 123508901 | 123508901 | + | C | C |
| 12 | 53045473  | 53045473  | + | C | C |
| 6  | 51915060  | 51915060  | + | C | C |
| 19 | 45175212  | 45175212  | + | T | T |
| 17 | 37187885  | 37187885  | + | G | G |
| 5  | 43294182  | 43294182  | + | T | T |
| 13 | 28897045  | 28897045  | + | C | C |
| 2  | 168101530 | 168101530 | + | G | G |
| 13 | 19442316  | 19442316  | + | G | G |
| 16 | 3544590   | 3544590   | + | G | G |
| 12 | 62954155  | 62954155  | + | C | C |
| 22 | 36585984  | 36585984  | + | C | C |
| 19 | 58600066  | 58600066  | + | G | G |
| 8  | 110516714 | 110516714 | + | G | G |
| 5  | 21975272  | 21975272  | + | C | C |
| 1  | 151746971 | 151746971 | + | G | G |
| 8  | 35631834  | 35631834  | + | C | C |
| 2  | 133539621 | 133539621 | + | C | C |
| 17 | 10416998  | 10416998  | + | G | G |
| 6  | 43415432  | 43415432  | + | G | G |
| 7  | 82585683  | 82585683  | + | C | C |
| 19 | 52132655  | 52132655  | + | C | C |
| 11 | 50003387  | 50003387  | + | C | C |
| 20 | 3842060   | 3842060   | + | C | C |
| 4  | 91321206  | 91321206  | + | G | G |
| 9  | 4118530   | 4118530   | + | G | G |
| 21 | 47544628  | 47544628  | + | G | G |
| 12 | 21011428  | 21011428  | + | G | G |
| 16 | 4796394   | 4796394   | + | G | G |
| 11 | 18322413  | 18322413  | + | G | G |
| 16 | 61760902  | 61760902  | + | C | C |
| 19 | 16536051  | 16536051  | + | G | G |
| 17 | 3119101   | 3119101   | + | C | C |
| 18 | 72238493  | 72238493  | + | G | G |
| 5  | 9122906   | 9122906   | + | G | G |
| 2  | 191900949 | 191900949 | + | G | G |
| 7  | 127973381 | 127973381 | + | G | G |
| 16 | 2031007   | 2031007   | + | G | G |
| 1  | 78326917  | 78326917  | + | G | G |
| 3  | 56114993  | 56114993  | + | C | C |
| 13 | 24895551  | 24895551  | + | C | C |

|    |           |           |   |   |   |
|----|-----------|-----------|---|---|---|
| 11 | 64564018  | 64564018  | + | G | G |
| 7  | 154684688 | 154684688 | + | C | C |
| 20 | 36856563  | 36856563  | + | G | G |
| 1  | 11561619  | 11561619  | + | C | C |
| 3  | 138038367 | 138038367 | + | G | G |
| 4  | 79371464  | 79371464  | + | G | G |
| 3  | 38639283  | 38639283  | + | G | G |
| 7  | 905665    | 905665    | + | G | G |
| 15 | 75931970  | 75931970  | + | G | G |
| 4  | 70865394  | 70865394  | + | C | C |
| 5  | 140626178 | 140626178 | + | C | C |
| 16 | 74706276  | 74706276  | + | G | G |
| 5  | 42801337  | 42801337  | + | G | G |
| 4  | 146823329 | 146823329 | + | G | G |
| 12 | 21727219  | 21727219  | + | G | G |
| 5  | 150029703 | 150029703 | + | C | C |
| 11 | 66626492  | 66626492  | + | G | G |
| 11 | 4510138   | 4510138   | + | C | C |
| 18 | 7013944   | 7013944   | + | G | G |
| 4  | 115751011 | 115751011 | + | C | C |
| 1  | 39798312  | 39798312  | + | G | G |
| 15 | 72637941  | 72637941  | + | G | G |
| 12 | 8082528   | 8082528   | + | C | C |
| 5  | 42719349  | 42719349  | + | G | G |
| 19 | 38985047  | 38985047  | + | C | C |
| 1  | 236572558 | 236572558 | + | C | C |
| 3  | 35732361  | 35732361  | + | C | C |
| 7  | 14797337  | 14797337  | + | C | C |
| 1  | 157514167 | 157514167 | + | C | C |
| 14 | 35183874  | 35183874  | + | G | G |
| 16 | 72821154  | 72821154  | + | C | C |
| 5  | 141033746 | 141033746 | + | G | G |
| 1  | 113252776 | 113252776 | + | T | T |
| 19 | 56244884  | 56244884  | + | C | C |
| 17 | 60484517  | 60484517  | + | G | G |
| 1  | 36026254  | 36026254  | + | G | G |
| 19 | 49129245  | 49129245  | + | C | C |
| 14 | 68109066  | 68109066  | + | G | G |
| 4  | 185038033 | 185038033 | + | C | C |
| 16 | 19492713  | 19492713  | + | C | C |
| 1  | 17593246  | 17593246  | + | C | C |
| 5  | 177419822 | 177419822 | + | T | T |
| 4  | 74276105  | 74276105  | + | G | G |



|    |           |           |   |   |   |
|----|-----------|-----------|---|---|---|
| 5  | 153065824 | 153065824 | + | G | G |
| 17 | 66130933  | 66130933  | + | C | C |
| 12 | 65672566  | 65672566  | + | C | C |
| 7  | 141767183 | 141767183 | + | C | C |
| 19 | 9068052   | 9068052   | + | G | G |
| 9  | 113170459 | 113170459 | + | C | C |
| 1  | 144816614 | 144816614 | + | C | C |
| 12 | 56848137  | 56848137  | + | G | G |
| 3  | 167272452 | 167272452 | + | C | C |
| 14 | 52466476  | 52466476  | + | C | C |
| 4  | 79418071  | 79418071  | + | G | G |
| 3  | 123071390 | 123071390 | + | G | G |
| 20 | 18794445  | 18794445  | + | G | G |
| 7  | 117003535 | 117003535 | + | C | C |
| 3  | 108788542 | 108788542 | + | C | C |
| 7  | 151483575 | 151483575 | + | C | C |
| 4  | 189060802 | 189060802 | + | G | G |
| 1  | 248285699 | 248285699 | + | G | G |
| 17 | 61958493  | 61958493  | + | G | G |
| 18 | 47527697  | 47527697  | + | G | G |
| 1  | 186647394 | 186647394 | + | T | T |
| 7  | 72658318  | 72658318  | + | C | C |
| 5  | 75893407  | 75893407  | + | C | C |
| 19 | 46387913  | 46387913  | + | G | G |
| 11 | 123814182 | 123814182 | + | G | G |
| 16 | 51174488  | 51174488  | + | G | G |
| 13 | 100543576 | 100543576 | + | C | C |
| 22 | 25023360  | 25023360  | + | C | C |
| 5  | 176862046 | 176862046 | + | C | C |
| 10 | 127542738 | 127542738 | + | C | C |
| 6  | 85446404  | 85446404  | + | C | C |
| 16 | 3406670   | 3406670   | + | C | C |
| 6  | 152826379 | 152826379 | + | G | G |
| 1  | 181701979 | 181701979 | + | G | G |
| 7  | 73944153  | 73944153  | + | G | G |
| 14 | 94770671  | 94770671  | + | G | G |
| 7  | 144015484 | 144015484 | + | G | G |
| 11 | 3423085   | 3423085   | + | C | C |
| 8  | 39634655  | 39634655  | + | G | G |
| 15 | 71953006  | 71953006  | + | C | C |
| 17 | 30190266  | 30190266  | + | G | G |
| 16 | 22926529  | 22926529  | + | C | C |
| 14 | 90734570  | 90734570  | + | A | A |

|    |           |           |   |   |   |
|----|-----------|-----------|---|---|---|
| 6  | 52622712  | 52622712  | + | T | T |
| 16 | 89351344  | 89351344  | + | G | G |
| 9  | 123594146 | 123594146 | + | A | A |
| 1  | 97700503  | 97700503  | + | G | G |
| 16 | 14916925  | 14916925  | + | C | C |
| 2  | 152520256 | 152520256 | + | C | C |
| 5  | 52221129  | 52221129  | + | G | G |
| 4  | 1374712   | 1374712   | + | G | G |
| 8  | 105393481 | 105393481 | + | G | G |
| 12 | 70915226  | 70915226  | + | A | A |
| 12 | 2788659   | 2788659   | + | G | G |
| 22 | 44645535  | 44645535  | + | C | C |
| 14 | 101493146 | 101493146 | + | G | G |
| 12 | 14650808  | 14650808  | + | C | C |
| 5  | 35807025  | 35807025  | + | C | C |
| 4  | 147177519 | 147177519 | + | C | C |
| 11 | 31327203  | 31327203  | + | G | G |
| 8  | 144773847 | 144773847 | + | C | C |
| 3  | 140178451 | 140178451 | + | G | G |
| 18 | 7231394   | 7231394   | + | C | C |
| 22 | 50893315  | 50893315  | + | C | C |
| 2  | 152317738 | 152317738 | + | A | A |
| 13 | 39343753  | 39343753  | + | G | G |
| 11 | 118343213 | 118343213 | + | C | C |
| 6  | 26156775  | 26156775  | + | G | G |
| 17 | 21319539  | 21319539  | + | C | C |
| 2  | 202050595 | 202050595 | + | G | G |
| 1  | 50884462  | 50884462  | + | C | C |
| 3  | 68782305  | 68782305  | + | C | C |
| 2  | 21229885  | 21229885  | + | G | G |
| 8  | 113529349 | 113529349 | + | C | C |
| 20 | 50230268  | 50230268  | + | G | G |
| 11 | 77639495  | 77639495  | + | C | C |
| 14 | 105927152 | 105927152 | + | C | C |
| 6  | 149700322 | 149700322 | + | G | G |
| 13 | 72049284  | 72049284  | + | C | C |
| 10 | 102541039 | 102541039 | + | C | C |
| 6  | 55223928  | 55223928  | + | C | C |
| 2  | 74329108  | 74329108  | + | C | C |
| 17 | 61762887  | 61762887  | + | C | C |
| 11 | 44939578  | 44939578  | + | C | C |
| 1  | 179834368 | 179834368 | + | G | G |
| X  | 18230694  | 18230694  | + | A | A |

|            |           |           |   |   |   |
|------------|-----------|-----------|---|---|---|
| 1          | 201182536 | 201182536 | + | G | G |
| 5          | 71743204  | 71743204  | + | C | C |
| 16         | 70164343  | 70164343  | + | C | C |
| 12         | 21727189  | 21727189  | + | G | G |
| X          | 118972010 | 118972010 | + | C | C |
| 12         | 6464954   | 6464954   | + | C | C |
| 2          | 128321809 | 128321809 | + | G | G |
| 4          | 114823854 | 114823854 | + | C | C |
| 6          | 73787102  | 73787102  | + | T | T |
| 2          | 173786991 | 173786991 | + | C | C |
| 17         | 36499085  | 36499085  | + | G | G |
| 19         | 37441893  | 37441893  | + | C | C |
| 16         | 24135192  | 24135192  | + | G | G |
| 8          | 104513105 | 104513105 | + | T | T |
| 2          | 167089910 | 167089910 | + | G | G |
| 11         | 61050353  | 61050353  | + | G | G |
| 3          | 134339675 | 134339675 | + | C | C |
| 8          | 2836317   | 2836317   | + | T | T |
| 9          | 129642740 | 129642740 | + | C | C |
| 16         | 1391446   | 1391446   | + | G | G |
| 1          | 177250208 | 177250208 | + | G | G |
| 4          | 73179534  | 73179534  | + | G | G |
| 16         | 67181031  | 67181031  | + | C | C |
| 10         | 7801865   | 7801865   | + | G | G |
| 1          | 34158630  | 34158630  | + | C | C |
| 16         | 77401554  | 77401554  | + | C | C |
| GL000195.1 | 86601     | 86601     | + | A | A |
| 6          | 29589562  | 29589562  | + | G | G |
| 5          | 26881616  | 26881616  | + | C | C |
| 2          | 69093560  | 69093560  | + | C | C |
| 22         | 36634830  | 36634830  | + | G | G |
| 14         | 88652406  | 88652406  | + | C | C |
| 14         | 61180101  | 61180101  | + | A | A |
| 8          | 145094856 | 145094856 | + | C | C |
| 22         | 17447250  | 17447250  | + | C | C |
| 1          | 35852706  | 35852706  | + | G | G |
| 19         | 5778667   | 5778667   | + | G | G |
| 1          | 11562082  | 11562082  | + | C | C |
| 22         | 17488976  | 17488976  | + | C | C |
| 1          | 151377455 | 151377455 | + | G | G |
| X          | 109696273 | 109696273 | + | C | C |
| 2          | 176988963 | 176988963 | + | C | C |
| 16         | 74497355  | 74497355  | + | G | G |

|    |           |           |   |   |   |
|----|-----------|-----------|---|---|---|
| 4  | 153897486 | 153897486 | + | G | G |
| 14 | 75264852  | 75264852  | + | C | C |
| 19 | 58982376  | 58982376  | + | C | C |
| 4  | 155749030 | 155749030 | + | C | C |
| 11 | 293486    | 293486    | + | C | C |
| 6  | 150063574 | 150063574 | + | G | G |
| 2  | 185800935 | 185800935 | + | C | C |
| 8  | 73848248  | 73848248  | + | G | G |
| 7  | 93067422  | 93067422  | + | C | C |
| 7  | 48317722  | 48317722  | + | C | C |
| 2  | 198650724 | 198650724 | + | C | C |
| 6  | 88255359  | 88255359  | + | G | G |
| 7  | 7477083   | 7477083   | + | C | C |
| 7  | 55238274  | 55238274  | + | C | C |
| 1  | 94650528  | 94650528  | + | C | C |
| 10 | 79795554  | 79795554  | + | A | A |
| 5  | 140750104 | 140750104 | + | G | G |
| 20 | 44278037  | 44278037  | + | C | C |
| 9  | 109746495 | 109746495 | + | C | C |
| 19 | 58153445  | 58153445  | + | C | C |
| 16 | 25228600  | 25228600  | + | G | G |
| 15 | 57823956  | 57823956  | + | G | G |
| 11 | 55563697  | 55563697  | + | C | C |
| 9  | 79827939  | 79827939  | + | C | C |
| 13 | 42874510  | 42874510  | + | C | C |
| 13 | 84454883  | 84454883  | + | C | C |
| 19 | 13428094  | 13428094  | + | C | C |
| 6  | 146271550 | 146271550 | + | G | G |
| 1  | 104113276 | 104113276 | + | G | G |
| 2  | 234652503 | 234652503 | + | C | C |
| 10 | 27538795  | 27538795  | + | C | C |
| 8  | 40011187  | 40011187  | + | G | G |
| 12 | 7344248   | 7344248   | + | G | G |
| 12 | 53564275  | 53564275  | + | G | G |
| 19 | 758455    | 758455    | + | C | C |
| 12 | 57619423  | 57619423  | + | T | T |
| 6  | 2685774   | 2685774   | + | C | C |
| 8  | 113301664 | 113301664 | + | G | G |
| 11 | 5373379   | 5373379   | + | C | C |
| 3  | 121647395 | 121647395 | + | C | C |
| 6  | 55638936  | 55638936  | + | C | C |
| 12 | 66152472  | 66152472  | + | G | G |
| 19 | 48385446  | 48385446  | + | G | G |

|    |           |           |   |   |   |
|----|-----------|-----------|---|---|---|
| 7  | 150027742 | 150027742 | + | G | G |
| 1  | 226074602 | 226074602 | + | G | G |
| 15 | 83932130  | 83932130  | + | G | G |
| 2  | 183088622 | 183088622 | + | C | C |
| 7  | 122755447 | 122755447 | + | G | G |
| 4  | 103966101 | 103966101 | + | C | C |
| 19 | 15338209  | 15338209  | + | C | C |
| 11 | 5221034   | 5221034   | + | G | G |
| 19 | 56443522  | 56443522  | + | G | G |
| 6  | 30891345  | 30891345  | + | C | C |
| 4  | 69693201  | 69693201  | + | G | G |
| X  | 106016288 | 106016288 | + | C | C |
| 14 | 25101090  | 25101090  | + | G | G |
| 8  | 26628173  | 26628173  | + | G | G |
| 4  | 123197255 | 123197255 | + | C | C |
| 1  | 24658102  | 24658102  | + | G | G |
| 22 | 22869952  | 22869952  | + | C | C |
| 12 | 29689087  | 29689087  | + | T | T |
| 17 | 79517372  | 79517372  | + | G | G |
| 19 | 20044655  | 20044655  | + | C | C |
| 8  | 39821142  | 39821142  | + | C | C |
| X  | 102004653 | 102004653 | + | C | C |
| 4  | 3432702   | 3432702   | + | C | C |
| 5  | 161113254 | 161113254 | + | G | G |
| 2  | 102792132 | 102792132 | + | G | G |
| 3  | 58194001  | 58194001  | + | C | C |
| 9  | 100899913 | 100899913 | + | C | C |
| 3  | 127441354 | 127441354 | + | G | G |
| 11 | 64762005  | 64762005  | + | T | T |
| 7  | 150389501 | 150389501 | + | C | C |
| 12 | 22602656  | 22602656  | + | G | G |
| 2  | 196765209 | 196765209 | + | G | G |
| 3  | 17226604  | 17226604  | + | G | G |
| 9  | 124530834 | 124530834 | + | C | C |
| 19 | 41770541  | 41770541  | + | G | G |
| 9  | 116779113 | 116779113 | + | G | G |
| 12 | 6965611   | 6965611   | + | C | C |
| 3  | 118867127 | 118867127 | + | C | C |
| 4  | 126240654 | 126240654 | + | G | G |
| 2  | 71650506  | 71650506  | + | C | C |
| 1  | 176738892 | 176738892 | + | C | C |
| 3  | 3886176   | 3886176   | + | C | C |
| 1  | 158590242 | 158590242 | + | G | G |

|    |           |           |   |   |   |
|----|-----------|-----------|---|---|---|
| 7  | 50560638  | 50560638  | + | C | C |
| 3  | 46009713  | 46009713  | + | C | C |
| 22 | 18028668  | 18028668  | + | C | C |
| 11 | 5730387   | 5730387   | + | C | C |
| 6  | 31962470  | 31962470  | + | G | G |
| 4  | 166960589 | 166960589 | + | C | C |
| 6  | 151914356 | 151914356 | + | C | C |
| 6  | 151686899 | 151686899 | + | C | C |
| 22 | 22869951  | 22869951  | + | C | C |
| 15 | 74335404  | 74335404  | + | C | C |
| 14 | 24528906  | 24528906  | + | C | C |
| 19 | 31039066  | 31039066  | + | G | G |
| X  | 302203    | 302203    | + | C | C |
| 1  | 161512635 | 161512635 | + | C | C |
| 14 | 92258782  | 92258782  | + | T | T |
| 14 | 21896152  | 21896152  | + | G | G |
| 19 | 20748612  | 20748612  | + | C | C |
| 7  | 143632988 | 143632988 | + | C | C |
| 10 | 96522549  | 96522549  | + | C | C |
| 16 | 17232358  | 17232358  | + | G | G |
| 12 | 108641935 | 108641935 | + | G | G |
| 7  | 138456007 | 138456007 | + | G | G |
| 1  | 71331504  | 71331504  | + | G | G |
| 8  | 2806887   | 2806887   | + | C | C |
| 7  | 14653031  | 14653031  | + | G | G |
| 20 | 62571788  | 62571788  | + | G | G |
| 18 | 14763864  | 14763864  | + | G | G |
| 6  | 22570002  | 22570002  | + | C | C |
| 2  | 30955428  | 30955428  | + | G | G |
| 12 | 109998863 | 109998863 | + | C | C |
| 11 | 6661403   | 6661403   | + | G | G |
| 4  | 1377614   | 1377614   | + | C | C |
| 2  | 113818484 | 113818484 | + | G | G |
| 7  | 100685707 | 100685707 | + | C | C |
| 3  | 183996413 | 183996413 | + | C | C |
| 21 | 41450620  | 41450620  | + | C | C |
| 5  | 121188003 | 121188003 | + | C | C |
| 17 | 74014074  | 74014074  | + | G | G |
| 13 | 75813554  | 75813554  | + | C | C |
| 11 | 63078549  | 63078549  | + | C | C |
| 12 | 43821145  | 43821145  | + | G | G |
| 12 | 55715260  | 55715260  | + | C | C |
| 11 | 26720074  | 26720074  | + | T | T |

|    |           |           |   |   |   |
|----|-----------|-----------|---|---|---|
| 14 | 96848663  | 96848663  | + | G | G |
| 2  | 152520169 | 152520169 | + | C | C |
| 11 | 129744194 | 129744194 | + | A | A |
| 9  | 113457809 | 113457809 | + | G | G |
| 1  | 75038215  | 75038215  | + | C | C |
| 10 | 124908000 | 124908000 | + | G | G |
| 1  | 100378042 | 100378042 | + | C | C |
| 16 | 23695390  | 23695390  | + | C | C |
| 2  | 192701327 | 192701327 | + | C | C |
| 3  | 129303248 | 129303248 | + | G | G |
| 11 | 11964157  | 11964157  | + | G | G |
| 14 | 57938250  | 57938250  | + | C | C |
| 10 | 49414923  | 49414923  | + | C | C |
| 2  | 150325252 | 150325252 | + | C | C |
| 11 | 11373968  | 11373968  | + | G | G |
| 20 | 34285660  | 34285660  | + | G | G |
| 2  | 168103879 | 168103879 | + | G | G |
| 3  | 2861254   | 2861254   | + | C | C |
| 4  | 120193220 | 120193220 | + | C | C |
| 20 | 57767919  | 57767919  | + | C | C |
| 1  | 24022829  | 24022829  | + | T | T |
| 9  | 124535097 | 124535097 | + | C | C |
| 6  | 159457436 | 159457436 | + | G | G |
| 13 | 19625317  | 19625317  | + | C | C |
| 1  | 144520871 | 144520871 | + | C | C |
| 12 | 108985637 | 108985637 | + | C | C |
| 2  | 44502879  | 44502879  | + | C | C |
| 1  | 12888541  | 12888541  | + | G | G |
| 22 | 22516962  | 22516962  | + | C | C |
| 10 | 90699265  | 90699265  | + | G | G |
| 19 | 14208362  | 14208362  | + | G | G |
| 7  | 36579976  | 36579976  | + | G | G |
| 4  | 37848707  | 37848707  | + | C | C |
| 1  | 40228853  | 40228853  | + | C | C |
| 4  | 75673313  | 75673313  | + | C | C |
| X  | 5827132   | 5827132   | + | G | G |
| 1  | 207111086 | 207111086 | + | G | G |
| 1  | 166891939 | 166891939 | + | C | C |
| 10 | 129179590 | 129179590 | + | C | C |
| 19 | 49259723  | 49259723  | + | C | C |
| 2  | 152830242 | 152830242 | + | C | C |
| 19 | 57641786  | 57641786  | + | G | G |
| 12 | 52825810  | 52825810  | + | C | C |

|    |           |           |   |   |   |
|----|-----------|-----------|---|---|---|
| 5  | 128994404 | 128994404 | + | G | G |
| 11 | 61295495  | 61295495  | + | C | C |
| 1  | 152192141 | 152192141 | + | C | C |
| 1  | 111862963 | 111862963 | + | G | G |
| 11 | 49974850  | 49974850  | + | G | G |
| 11 | 7726120   | 7726120   | + | G | G |
| 2  | 135781097 | 135781097 | + | C | C |
| 11 | 11964024  | 11964024  | + | G | G |
| 15 | 34646657  | 34646657  | + | G | G |
| 11 | 64572608  | 64572608  | + | G | G |
| 6  | 76624777  | 76624777  | + | G | G |
| 13 | 29040997  | 29040997  | + | T | T |
| 18 | 44559779  | 44559779  | + | C | C |
| 17 | 62271079  | 62271079  | + | G | G |
| 1  | 33958853  | 33958853  | + | C | C |
| 2  | 160176705 | 160176705 | + | A | A |
| 5  | 5462263   | 5462263   | + | C | C |
| 1  | 115256528 | 115256528 | + | T | T |
| 18 | 28576899  | 28576899  | + | C | C |
| 22 | 50893314  | 50893314  | + | C | C |
| 12 | 81283035  | 81283035  | + | G | G |
| 1  | 12785617  | 12785617  | + | G | G |
| 1  | 39494450  | 39494450  | + | G | G |
| 3  | 184295517 | 184295517 | + | C | C |
| 2  | 27169779  | 27169779  | + | C | C |
| 12 | 46321919  | 46321919  | + | G | G |
| 21 | 39764266  | 39764266  | + | G | G |
| 1  | 171154948 | 171154948 | + | G | G |
| 19 | 33639800  | 33639800  | + | C | C |
| 22 | 30418679  | 30418679  | + | C | C |
| 6  | 96651459  | 96651459  | + | C | C |
| 13 | 114288317 | 114288317 | + | C | C |
| 4  | 100228869 | 100228869 | + | G | G |
| 9  | 114148657 | 114148657 | + | C | C |
| 13 | 42874762  | 42874762  | + | C | C |
| 8  | 110985004 | 110985004 | + | C | C |
| X  | 89177140  | 89177140  | + | G | G |
| 7  | 100552491 | 100552491 | + | C | C |
| 19 | 20229030  | 20229030  | + | C | C |
| 19 | 55045160  | 55045160  | + | T | T |
| 1  | 170043673 | 170043673 | + | G | G |
| 12 | 1995145   | 1995145   | + | G | G |
| 1  | 74957895  | 74957895  | + | C | C |



|    |           |           |   |   |   |
|----|-----------|-----------|---|---|---|
| 19 | 9069570   | 9069570   | + | G | G |
| 10 | 37422861  | 37422861  | + | C | C |
| 7  | 142176567 | 142176567 | + | C | C |
| X  | 10176427  | 10176427  | + | G | G |
| 15 | 66845380  | 66845380  | + | C | C |
| 1  | 155921720 | 155921720 | + | G | G |
| 12 | 118199001 | 118199001 | + | G | G |
| 2  | 233347133 | 233347133 | + | G | G |
| 19 | 54677858  | 54677858  | + | G | G |
| 15 | 40662068  | 40662068  | + | C | C |
| 20 | 62320410  | 62320410  | + | C | C |
| 22 | 23237736  | 23237736  | + | G | G |
| 1  | 166963291 | 166963291 | + | C | C |
| 15 | 43237411  | 43237411  | + | G | G |
| 11 | 121454244 | 121454244 | + | G | G |
| 9  | 39176085  | 39176085  | + | C | C |
| X  | 26212817  | 26212817  | + | C | C |
| 4  | 162421280 | 162421280 | + | C | C |
| 1  | 41494334  | 41494334  | + | C | C |
| 6  | 136472372 | 136472372 | + | G | G |
| 2  | 29383208  | 29383208  | + | C | C |
| 1  | 158326628 | 158326628 | + | C | C |
| 9  | 90266522  | 90266522  | + | C | C |
| 5  | 79335937  | 79335937  | + | C | C |
| 2  | 102968057 | 102968057 | + | C | C |
| 19 | 46127977  | 46127977  | + | C | C |
| 14 | 21833070  | 21833070  | + | G | G |
| 1  | 43891769  | 43891769  | + | G | G |
| 9  | 115422064 | 115422064 | + | C | C |
| 14 | 26918116  | 26918116  | + | A | A |
| 13 | 42385427  | 42385427  | + | G | G |
| 8  | 68968189  | 68968189  | + | C | C |
| 19 | 55597473  | 55597473  | + | G | G |
| 2  | 179437790 | 179437790 | + | C | C |
| 2  | 196726520 | 196726520 | + | G | G |
| 11 | 15212308  | 15212308  | + | A | A |
| 14 | 105413624 | 105413624 | + | G | G |
| 15 | 22482917  | 22482917  | + | G | G |
| X  | 57473369  | 57473369  | + | G | G |
| 21 | 42748977  | 42748977  | + | C | C |
| 13 | 32776085  | 32776085  | + | C | C |
| 5  | 6751164   | 6751164   | + | C | C |
| 8  | 110283349 | 110283349 | + | G | G |

|    |           |           |   |   |   |
|----|-----------|-----------|---|---|---|
| 10 | 49632628  | 49632628  | + | C | C |
| 12 | 51882560  | 51882560  | + | C | C |
| 8  | 72182026  | 72182026  | + | G | G |
| 9  | 21227539  | 21227539  | + | G | G |
| 6  | 76023051  | 76023051  | + | G | G |
| 19 | 6459574   | 6459574   | + | G | G |
| 19 | 17836931  | 17836931  | + | C | C |
| 2  | 27803256  | 27803256  | + | G | G |
| 3  | 171320888 | 171320888 | + | G | G |
| 10 | 103868730 | 103868730 | + | G | G |
| 19 | 37643171  | 37643171  | + | G | G |
| 16 | 14029451  | 14029451  | + | C | C |
| 9  | 78804060  | 78804060  | + | G | G |
| 3  | 98110043  | 98110043  | + | C | C |
| 18 | 2697971   | 2697971   | + | G | G |
| 9  | 96439880  | 96439880  | + | G | G |
| 19 | 4433440   | 4433440   | + | G | G |
| 11 | 3249814   | 3249814   | + | G | G |
| 3  | 24018851  | 24018851  | + | C | C |
| 1  | 196712663 | 196712663 | + | G | G |
| 4  | 164393287 | 164393287 | + | G | G |
| 1  | 85122088  | 85122088  | + | G | G |
| 1  | 57431638  | 57431638  | + | G | G |
| X  | 151303297 | 151303297 | + | C | C |
| 5  | 140567977 | 140567977 | + | G | G |
| 21 | 35288071  | 35288071  | + | C | C |
| 9  | 135929310 | 135929310 | + | C | C |
| 1  | 228003834 | 228003834 | + | C | C |
| 3  | 180324303 | 180324303 | + | G | G |
| 12 | 9261995   | 9261995   | + | G | G |
| 10 | 105006363 | 105006363 | + | G | G |
| 1  | 109825161 | 109825161 | + | C | C |
| 7  | 149515056 | 149515056 | + | C | C |
| 19 | 45175213  | 45175213  | + | C | C |
| 1  | 12887667  | 12887667  | + | C | C |
| 21 | 11039138  | 11039138  | + | G | G |
| 11 | 16776616  | 16776616  | + | T | T |
| 4  | 173961193 | 173961193 | + | T | T |
| 19 | 42224867  | 42224867  | + | C | C |
| 1  | 148891639 | 148891639 | + | C | C |
| 12 | 65564530  | 65564530  | + | C | C |
| 9  | 77377706  | 77377706  | + | C | C |
| 8  | 55540862  | 55540862  | + | C | C |

|    |           |           |   |   |   |
|----|-----------|-----------|---|---|---|
| 11 | 123886642 | 123886642 | + | C | C |
| 2  | 234775238 | 234775238 | + | G | G |
| 22 | 50598157  | 50598157  | + | G | G |
| 4  | 3225136   | 3225136   | + | G | G |
| 1  | 119988632 | 119988632 | + | G | G |
| 12 | 48369332  | 48369332  | + | G | G |
| 8  | 144943483 | 144943483 | + | C | C |
| 22 | 17072257  | 17072257  | + | C | C |
| 14 | 105452939 | 105452939 | + | C | C |
| 11 | 68665456  | 68665456  | + | A | A |
| 19 | 43406587  | 43406587  | + | C | C |
| 19 | 9077652   | 9077652   | + | C | C |
| 2  | 48027444  | 48027444  | + | A | A |
| 22 | 37770084  | 37770084  | + | G | G |
| 10 | 61835256  | 61835256  | + | G | G |
| 2  | 25462012  | 25462012  | + | G | G |
| 16 | 3254815   | 3254815   | + | C | C |
| 16 | 30779623  | 30779623  | + | C | C |
| 3  | 48310051  | 48310051  | + | C | C |
| 20 | 55910508  | 55910508  | + | C | C |
| 1  | 236143127 | 236143127 | + | C | C |
| X  | 84563138  | 84563138  | + | C | C |
| 19 | 51919467  | 51919467  | + | G | G |
| 14 | 21762900  | 21762900  | + | C | C |
| 11 | 71259851  | 71259851  | + | C | C |
| 2  | 51255202  | 51255202  | + | G | G |
| 5  | 110441019 | 110441019 | + | T | T |
| 6  | 159457437 | 159457437 | + | G | G |
| 5  | 149215864 | 149215864 | + | G | G |
| 5  | 151771948 | 151771948 | + | G | G |
| 1  | 116676045 | 116676045 | + | G | G |
| 4  | 10089481  | 10089481  | + | G | G |
| 1  | 215408287 | 215408287 | + | C | C |
| 21 | 41710112  | 41710112  | + | C | C |
| 1  | 18023820  | 18023820  | + | C | C |
| 16 | 29974451  | 29974451  | + | C | C |
| 14 | 75019602  | 75019602  | + | G | G |
| 20 | 60994786  | 60994786  | + | C | C |
| 1  | 57219549  | 57219549  | + | T | T |
| 17 | 26874569  | 26874569  | + | G | G |
| 10 | 98806799  | 98806799  | + | G | G |
| 14 | 106478094 | 106478094 | + | C | C |
| 4  | 8469739   | 8469739   | + | T | T |

|    |           |           |   |   |   |
|----|-----------|-----------|---|---|---|
| 6  | 167796323 | 167796323 | + | C | C |
| 1  | 15789333  | 15789333  | + | G | G |
| 10 | 44139945  | 44139945  | + | C | C |
| 17 | 39739633  | 39739633  | + | C | C |
| 6  | 31962469  | 31962469  | + | G | G |
| 16 | 2546846   | 2546846   | + | C | C |
| 1  | 224420968 | 224420968 | + | A | A |
| 2  | 223066845 | 223066845 | + | G | G |
| 8  | 72977692  | 72977692  | + | C | C |
| 15 | 100942967 | 100942967 | + | C | C |
| 3  | 16630195  | 16630195  | + | C | C |
| 3  | 154866365 | 154866365 | + | C | C |
| 8  | 110980575 | 110980575 | + | C | C |
| 1  | 33736105  | 33736105  | + | G | G |
| 11 | 6291976   | 6291976   | + | G | G |
| 4  | 20711353  | 20711353  | + | C | C |
| 1  | 104118101 | 104118101 | + | C | C |
| 12 | 124092996 | 124092996 | + | C | C |
| 1  | 207658866 | 207658866 | + | A | A |
| 6  | 30139985  | 30139985  | + | G | G |
| 12 | 13716008  | 13716008  | + | G | G |
| 14 | 106805193 | 106805193 | + | C | C |
| 8  | 10480718  | 10480718  | + | G | G |
| 3  | 42678519  | 42678519  | + | A | A |
| 10 | 3159086   | 3159086   | + | A | A |
| 2  | 27804481  | 27804481  | + | C | C |
| 18 | 31319127  | 31319127  | + | G | G |
| 1  | 153122487 | 153122487 | + | C | C |
| 18 | 59483262  | 59483262  | + | C | C |
| 20 | 52824634  | 52824634  | + | C | C |
| 4  | 39247034  | 39247034  | + | C | C |
| 2  | 55252359  | 55252359  | + | G | G |
| 19 | 36122409  | 36122409  | + | G | G |
| 19 | 9057147   | 9057147   | + | G | G |
| 2  | 10267092  | 10267092  | + | C | C |
| 6  | 43272508  | 43272508  | + | C | C |
| 19 | 10103743  | 10103743  | + | C | C |
| 2  | 228141184 | 228141184 | + | G | G |
| 19 | 4552651   | 4552651   | + | C | C |
| 17 | 6544320   | 6544320   | + | G | G |
| 7  | 74212018  | 74212018  | + | C | C |
| 17 | 4647696   | 4647696   | + | G | G |
| 15 | 67687881  | 67687881  | + | G | G |

|    |           |           |   |   |   |
|----|-----------|-----------|---|---|---|
| 9  | 27950133  | 27950133  | + | C | C |
| 10 | 82348440  | 82348440  | + | G | G |
| 1  | 55080470  | 55080470  | + | G | G |
| 2  | 192700554 | 192700554 | + | G | G |
| 2  | 170663349 | 170663349 | + | A | A |
| 4  | 70715151  | 70715151  | + | C | C |
| 12 | 55886995  | 55886995  | + | C | C |
| 1  | 226074603 | 226074603 | + | G | G |
| 18 | 52556597  | 52556597  | + | G | G |
| 16 | 2233715   | 2233715   | + | G | G |
| 6  | 117629985 | 117629985 | + | C | C |
| 7  | 90006839  | 90006839  | + | C | C |
| 4  | 94343942  | 94343942  | + | C | C |
| 8  | 17072765  | 17072765  | + | C | C |
| Y  | 16941830  | 16941830  | + | C | C |
| 19 | 15338467  | 15338467  | + | G | G |
| 2  | 227892709 | 227892709 | + | C | C |
| X  | 35821078  | 35821078  | + | G | G |
| 3  | 194062766 | 194062766 | + | G | G |
| 6  | 43418981  | 43418981  | + | C | C |
| 22 | 29833653  | 29833653  | + | C | C |
| 15 | 40558265  | 40558265  | + | C | C |
| 8  | 146156390 | 146156390 | + | G | G |
| 2  | 238253835 | 238253835 | + | C | C |
| 13 | 41834893  | 41834893  | + | G | G |
| 7  | 141952147 | 141952147 | + | C | C |
| 11 | 111405295 | 111405295 | + | C | C |
| 10 | 27692241  | 27692241  | + | C | C |
| 7  | 45108060  | 45108060  | + | C | C |
| 8  | 39080635  | 39080635  | + | C | C |
| 2  | 108479195 | 108479195 | + | G | G |
| 1  | 168054909 | 168054909 | + | A | A |
| 16 | 30995381  | 30995381  | + | C | C |
| 11 | 3041510   | 3041510   | + | G | G |
| 10 | 105215418 | 105215418 | + | G | G |
| 11 | 64596985  | 64596985  | + | G | G |
| X  | 2825406   | 2825406   | + | G | G |
| 1  | 158615343 | 158615343 | + | G | G |
| 12 | 2675731   | 2675731   | + | G | G |
| 18 | 57103301  | 57103301  | + | C | C |
| 6  | 32609754  | 32609754  | + | C | C |
| 19 | 53770172  | 53770172  | + | G | G |
| 3  | 130290189 | 130290189 | + | G | G |

|    |           |           |   |   |   |
|----|-----------|-----------|---|---|---|
| 16 | 68328620  | 68328620  | + | G | G |
| X  | 111019805 | 111019805 | + | C | C |
| 17 | 26816331  | 26816331  | + | C | C |
| 19 | 43709715  | 43709715  | + | C | C |
| 13 | 29040932  | 29040932  | + | C | C |
| 19 | 44891068  | 44891068  | + | G | G |
| 4  | 164271943 | 164271943 | + | C | C |
| 5  | 485289    | 485289    | + | C | C |
| 18 | 30093483  | 30093483  | + | C | C |
| 2  | 7160804   | 7160804   | + | G | G |
| 15 | 23262379  | 23262379  | + | G | G |
| 4  | 126242399 | 126242399 | + | G | G |
| 6  | 4119470   | 4119470   | + | G | G |
| 1  | 156146569 | 156146569 | + | C | C |
| 9  | 125330040 | 125330040 | + | G | G |
| 17 | 37187975  | 37187975  | + | G | G |
| 19 | 15754722  | 15754722  | + | C | C |
| 9  | 136198650 | 136198650 | + | G | G |
| 17 | 7808462   | 7808462   | + | G | G |
| 1  | 152329880 | 152329880 | + | C | C |
| 1  | 166891940 | 166891940 | + | C | C |
| 12 | 48961785  | 48961785  | + | G | G |
| 10 | 118236283 | 118236283 | + | A | A |
| 2  | 167159671 | 167159671 | + | C | C |
| 8  | 144800458 | 144800458 | + | T | T |
| 19 | 55222246  | 55222246  | + | C | C |
| 9  | 78547335  | 78547335  | + | G | G |
| 11 | 71850855  | 71850855  | + | C | C |
| 22 | 45960846  | 45960846  | + | T | T |
| 11 | 57946977  | 57946977  | + | C | C |
| 19 | 51381993  | 51381993  | + | G | G |
| 10 | 72360548  | 72360548  | + | G | G |
| 3  | 8675581   | 8675581   | + | C | C |
| 4  | 83582169  | 83582169  | + | G | G |
| 12 | 49884488  | 49884488  | + | G | G |
| 22 | 17488975  | 17488975  | + | C | C |
| 8  | 30889811  | 30889811  | + | G | G |
| 1  | 47028491  | 47028491  | + | G | G |
| 12 | 57549969  | 57549969  | + | C | C |
| X  | 40511078  | 40511078  | + | G | G |
| 3  | 138022477 | 138022477 | + | G | G |
| 10 | 27459708  | 27459708  | + | C | C |
| 10 | 95372407  | 95372407  | + | C | C |

|    |           |           |   |   |   |
|----|-----------|-----------|---|---|---|
| 5  | 41196033  | 41196033  | + | G | G |
| 7  | 150699381 | 150699381 | + | G | G |
| 2  | 9498987   | 9498987   | + | C | C |
| 18 | 14799244  | 14799244  | + | C | C |
| 8  | 101190049 | 101190049 | + | G | G |
| 3  | 158546813 | 158546813 | + | C | C |
| 7  | 138433961 | 138433961 | + | C | C |
| 1  | 209933534 | 209933534 | + | G | G |
| 10 | 43615600  | 43615600  | + | C | C |
| 3  | 40433689  | 40433689  | + | G | G |
| X  | 148037388 | 148037388 | + | C | C |
| 7  | 122839917 | 122839917 | + | G | G |
| 20 | 51870346  | 51870346  | + | G | G |
| 12 | 21242879  | 21242879  | + | C | C |
| 11 | 9047301   | 9047301   | + | G | G |
| 1  | 75038325  | 75038325  | + | G | G |
| 10 | 27052869  | 27052869  | + | G | G |
| 1  | 152129425 | 152129425 | + | G | G |
| 11 | 89486333  | 89486333  | + | G | G |
| 6  | 100368900 | 100368900 | + | G | G |
| 19 | 54848261  | 54848261  | + | G | G |
| 5  | 13714667  | 13714667  | + | G | G |
| 12 | 11506873  | 11506873  | + | C | C |
| 3  | 51696457  | 51696457  | + | C | C |
| 5  | 26902777  | 26902777  | + | G | G |
| 11 | 61070098  | 61070098  | + | G | G |
| 1  | 231471702 | 231471702 | + | C | C |
| 3  | 128706565 | 128706565 | + | G | G |
| 3  | 26751196  | 26751196  | + | C | C |
| 19 | 55739636  | 55739636  | + | G | G |
| 9  | 4285999   | 4285999   | + | C | C |
| 1  | 223986346 | 223986346 | + | G | G |
| 1  | 204401418 | 204401418 | + | G | G |
| 8  | 110476889 | 110476889 | + | G | G |
| 9  | 137726894 | 137726894 | + | C | C |
| 15 | 94883438  | 94883438  | + | G | G |
| X  | 70339629  | 70339629  | + | G | G |
| 1  | 196748991 | 196748991 | + | G | G |
| 12 | 123307997 | 123307997 | + | G | G |
| 3  | 38938483  | 38938483  | + | C | C |
| 19 | 39038895  | 39038895  | + | C | C |
| 21 | 15537711  | 15537711  | + | C | C |
| 12 | 57112020  | 57112020  | + | G | G |

|    |           |           |   |   |   |
|----|-----------|-----------|---|---|---|
| 14 | 92170936  | 92170936  | + | A | A |
| 3  | 172163192 | 172163192 | + | G | G |
| 6  | 83880105  | 83880105  | + | C | C |
| 7  | 39247093  | 39247093  | + | G | G |
| 13 | 96536810  | 96536810  | + | G | G |
| 12 | 49884484  | 49884484  | + | C | C |
| 1  | 35852708  | 35852708  | + | A | A |
| 6  | 32029489  | 32029489  | + | C | C |
| 6  | 152529126 | 152529126 | + | G | G |
| 21 | 32526684  | 32526684  | + | T | T |
| 19 | 10254709  | 10254709  | + | A | A |
| X  | 26212255  | 26212255  | + | C | C |
| 17 | 5036747   | 5036747   | + | C | C |
| 18 | 28916383  | 28916383  | + | C | C |
| 5  | 13901480  | 13901480  | + | G | G |
| 2  | 160673380 | 160673380 | + | G | G |
| 9  | 100692989 | 100692989 | + | G | G |
| 19 | 11565374  | 11565374  | + | G | G |
| 1  | 228362557 | 228362557 | + | C | C |
| 11 | 56757297  | 56757297  | + | G | G |
| 5  | 151771605 | 151771605 | + | A | A |
| 1  | 247751723 | 247751723 | + | C | C |
| 19 | 53303738  | 53303738  | + | G | G |
| 15 | 86838538  | 86838538  | + | G | G |
| 19 | 49392766  | 49392766  | + | C | C |
| 1  | 79002435  | 79002435  | + | C | C |
| 6  | 134212980 | 134212980 | + | G | G |
| 11 | 63230959  | 63230959  | + | G | G |
| 15 | 79296425  | 79296425  | + | G | G |
| 8  | 113392610 | 113392610 | + | G | G |
| 14 | 65007685  | 65007685  | + | C | C |
| 10 | 121563788 | 121563788 | + | C | C |
| 7  | 142131834 | 142131834 | + | C | C |
| 21 | 30365209  | 30365209  | + | G | G |
| 1  | 155018877 | 155018877 | + | G | G |
| 19 | 10505764  | 10505764  | + | A | A |
| 8  | 9912138   | 9912138   | + | C | C |
| 1  | 175355175 | 175355175 | + | G | G |
| 2  | 228884649 | 228884649 | + | C | C |
| 17 | 34097328  | 34097328  | + | C | C |
| 7  | 106545707 | 106545707 | + | G | G |
| 11 | 19077207  | 19077207  | + | C | C |
| 19 | 17922850  | 17922850  | + | C | C |



|    |           |           |   |   |   |
|----|-----------|-----------|---|---|---|
| 6  | 159670135 | 159670135 | + | G | G |
| 2  | 153484915 | 153484915 | + | G | G |
| 12 | 123343422 | 123343422 | + | C | C |
| 13 | 36229817  | 36229817  | + | C | C |
| 4  | 69816844  | 69816844  | + | G | G |
| 18 | 28993279  | 28993279  | + | G | G |
| 11 | 58206962  | 58206962  | + | G | G |
| 6  | 167347552 | 167347552 | + | G | G |
| 15 | 42058237  | 42058237  | + | A | A |
| 12 | 7586232   | 7586232   | + | C | C |
| 3  | 52968907  | 52968907  | + | A | A |
| 2  | 17997872  | 17997872  | + | G | G |
| 3  | 51671167  | 51671167  | + | C | C |
| 14 | 105414882 | 105414882 | + | C | C |
| 1  | 70446071  | 70446071  | + | C | C |
| 12 | 55863106  | 55863106  | + | T | T |
| 9  | 37537857  | 37537857  | + | C | C |
| 14 | 106321780 | 106321780 | + | C | C |
| 7  | 139229038 | 139229038 | + | G | G |
| 2  | 38302163  | 38302163  | + | G | G |
| 15 | 31206223  | 31206223  | + | C | C |
| 1  | 237754057 | 237754057 | + | G | G |
| 5  | 131549626 | 131549626 | + | G | G |
| 11 | 47358988  | 47358988  | + | G | G |
| 8  | 105361057 | 105361057 | + | G | G |
| 13 | 25507152  | 25507152  | + | G | G |
| 18 | 12277312  | 12277312  | + | C | C |
| 19 | 59009894  | 59009894  | + | G | G |
| 12 | 66731940  | 66731940  | + | C | C |
| 15 | 25420395  | 25420395  | + | C | C |
| 5  | 26902778  | 26902778  | + | G | G |
| 17 | 41006659  | 41006659  | + | C | C |
| 3  | 134322556 | 134322556 | + | C | C |
| 1  | 86920996  | 86920996  | + | C | C |
| 1  | 228556549 | 228556549 | + | C | C |
| 7  | 158663911 | 158663911 | + | C | C |
| 12 | 98995222  | 98995222  | + | C | C |
| 6  | 55039559  | 55039559  | + | C | C |
| 16 | 30309711  | 30309711  | + | G | G |
| 14 | 20444378  | 20444378  | + | C | C |
| 3  | 101023036 | 101023036 | + | C | C |
| 12 | 11506690  | 11506690  | + | C | C |
| 13 | 76379888  | 76379888  | + | G | G |

|    |           |           |   |   |   |
|----|-----------|-----------|---|---|---|
| 18 | 50985733  | 50985733  | + | G | G |
| 19 | 40424312  | 40424312  | + | G | G |
| 3  | 52858419  | 52858419  | + | G | G |
| 16 | 30676645  | 30676645  | + | C | C |
| X  | 36163024  | 36163024  | + | C | C |
| 2  | 32476513  | 32476513  | + | C | C |
| 9  | 129154438 | 129154438 | + | G | G |
| 12 | 12514272  | 12514272  | + | C | C |
| 1  | 63836568  | 63836568  | + | G | G |
| 19 | 53669266  | 53669266  | + | C | C |
| 8  | 109797061 | 109797061 | + | C | C |
| 16 | 61689428  | 61689428  | + | C | C |
| 19 | 362390    | 362390    | + | C | C |
| 3  | 98491760  | 98491760  | + | G | G |
| 12 | 57178745  | 57178745  | + | G | G |
| 17 | 8700978   | 8700978   | + | C | C |
| 22 | 46652686  | 46652686  | + | C | C |
| 17 | 37263711  | 37263711  | + | G | G |
| 12 | 62997465  | 62997465  | + | C | C |
| 1  | 47333659  | 47333659  | + | C | C |
| 14 | 50267355  | 50267355  | + | C | C |
| 19 | 9063816   | 9063816   | + | G | G |
| 2  | 88825923  | 88825923  | + | G | G |
| 15 | 89010404  | 89010404  | + | C | C |
| 20 | 36940285  | 36940285  | + | C | C |
| 14 | 22386750  | 22386750  | + | C | C |
| 5  | 13719112  | 13719112  | + | G | G |
| 1  | 216246511 | 216246511 | + | C | C |
| 4  | 187005266 | 187005266 | + | G | G |
| 7  | 103292226 | 103292226 | + | C | C |
| 3  | 164754209 | 164754209 | + | C | C |
| 1  | 94474362  | 94474362  | + | C | C |
| 12 | 48372429  | 48372429  | + | G | G |
| 9  | 90501876  | 90501876  | + | C | C |
| 19 | 17679494  | 17679494  | + | C | C |
| 3  | 93598104  | 93598104  | + | G | G |
| 12 | 106461074 | 106461074 | + | C | C |
| 1  | 144520872 | 144520872 | + | C | C |
| 12 | 71971764  | 71971764  | + | C | C |
| 17 | 39775769  | 39775769  | + | G | G |
| 12 | 108685786 | 108685786 | + | G | G |
| 3  | 62110097  | 62110097  | + | C | C |
| 1  | 142803657 | 142803657 | + | C | C |

|    |           |           |   |   |   |
|----|-----------|-----------|---|---|---|
| 16 | 30038045  | 30038045  | + | C | C |
| 18 | 63511279  | 63511279  | + | G | G |
| 8  | 8176416   | 8176416   | + | G | G |
| 17 | 80046866  | 80046866  | + | G | G |
| 9  | 117552898 | 117552898 | + | C | C |
| 12 | 109294201 | 109294201 | + | G | G |
| 2  | 97494863  | 97494863  | + | C | C |
| 20 | 44313595  | 44313595  | + | G | G |
| 6  | 74063096  | 74063096  | + | G | G |
| 16 | 10524702  | 10524702  | + | C | C |
| 19 | 44832450  | 44832450  | + | G | G |
| 21 | 37775118  | 37775118  | + | C | C |
| 19 | 55224612  | 55224612  | + | G | G |
| 15 | 25223352  | 25223352  | + | C | C |
| 3  | 52823739  | 52823739  | + | C | C |
| 19 | 49863122  | 49863122  | + | A | A |
| 7  | 142032412 | 142032412 | + | G | G |
| 8  | 73848897  | 73848897  | + | G | G |
| 1  | 156437841 | 156437841 | + | C | C |
| 18 | 29044213  | 29044213  | + | G | G |
| 6  | 10410413  | 10410413  | + | G | G |
| 3  | 121810487 | 121810487 | + | C | C |
| 11 | 56409057  | 56409057  | + | T | T |
| X  | 110459694 | 110459694 | + | C | C |
| 1  | 169500153 | 169500153 | + | C | C |
| 12 | 124885182 | 124885182 | + | C | C |
| 17 | 33802304  | 33802304  | + | C | C |
| 19 | 13411383  | 13411383  | + | C | C |
| 14 | 63175123  | 63175123  | + | G | G |
| 19 | 55175657  | 55175657  | + | C | C |
| 3  | 191888437 | 191888437 | + | G | G |
| 4  | 115585151 | 115585151 | + | G | G |
| 1  | 39893257  | 39893257  | + | A | A |
| 2  | 88427503  | 88427503  | + | G | G |
| 17 | 74902102  | 74902102  | + | C | C |
| 19 | 3964974   | 3964974   | + | G | G |
| 5  | 140182171 | 140182171 | + | C | C |
| 8  | 59409401  | 59409401  | + | G | G |
| 1  | 175325554 | 175325554 | + | G | G |
| 2  | 152521017 | 152521017 | + | C | C |
| 13 | 101759892 | 101759892 | + | C | C |
| 14 | 94844777  | 94844777  | + | G | G |
| 8  | 118817110 | 118817110 | + | G | G |

|    |           |           |   |   |   |
|----|-----------|-----------|---|---|---|
| 20 | 61574992  | 61574992  | + | G | G |
| 1  | 22453956  | 22453956  | + | C | C |
| 2  | 204735556 | 204735556 | + | G | G |
| 6  | 134350529 | 134350529 | + | G | G |
| 7  | 93065409  | 93065409  | + | G | G |
| 4  | 156634501 | 156634501 | + | G | G |
| 15 | 77771595  | 77771595  | + | C | C |
| 3  | 195481143 | 195481143 | + | G | G |
| 18 | 34802090  | 34802090  | + | G | G |
| 2  | 240969571 | 240969571 | + | G | G |
| 2  | 207516578 | 207516578 | + | G | G |
| 7  | 151164177 | 151164177 | + | C | C |
| 21 | 44949801  | 44949801  | + | G | G |
| 1  | 198721816 | 198721816 | + | C | C |
| 4  | 6865249   | 6865249   | + | C | C |
| 9  | 105757657 | 105757657 | + | G | G |
| 21 | 35183481  | 35183481  | + | C | C |
| 17 | 65942082  | 65942082  | + | C | C |
| 17 | 57057335  | 57057335  | + | G | G |
| 17 | 11572575  | 11572575  | + | C | C |
| 11 | 11989963  | 11989963  | + | C | C |
| 11 | 8720862   | 8720862   | + | G | G |
| 11 | 61976162  | 61976162  | + | C | C |
| 10 | 111637378 | 111637378 | + | G | G |
| 1  | 247978915 | 247978915 | + | C | C |
| 2  | 152411447 | 152411447 | + | C | C |
| 4  | 140375296 | 140375296 | + | C | C |
| 2  | 90199118  | 90199118  | + | C | C |
| 19 | 22157085  | 22157085  | + | G | G |
| 10 | 37430981  | 37430981  | + | G | G |
| 1  | 111441930 | 111441930 | + | C | C |
| 4  | 83769959  | 83769959  | + | G | G |
| 7  | 35242325  | 35242325  | + | G | G |
| 10 | 96116988  | 96116988  | + | G | G |
| 1  | 90473040  | 90473040  | + | C | C |
| 3  | 52328438  | 52328438  | + | C | C |
| 6  | 17764451  | 17764451  | + | C | C |
| 2  | 231035479 | 231035479 | + | T | T |
| 2  | 69177329  | 69177329  | + | C | C |
| 10 | 24762678  | 24762678  | + | G | G |
| 17 | 26890899  | 26890899  | + | G | G |
| 16 | 31427600  | 31427600  | + | T | T |
| 15 | 94858819  | 94858819  | + | C | C |

|    |           |           |   |   |   |
|----|-----------|-----------|---|---|---|
| 2  | 202700415 | 202700415 | + | C | C |
| 3  | 111432773 | 111432773 | + | C | C |
| 7  | 22270512  | 22270512  | + | C | C |
| 22 | 39436968  | 39436968  | + | G | G |
| 19 | 58565260  | 58565260  | + | C | C |
| 19 | 6820790   | 6820790   | + | C | C |
| 10 | 64973777  | 64973777  | + | G | G |
| 12 | 117217144 | 117217144 | + | C | C |
| 17 | 39974701  | 39974701  | + | G | G |
| 18 | 6876178   | 6876178   | + | C | C |
| 19 | 34292167  | 34292167  | + | C | C |
| 5  | 71743205  | 71743205  | + | C | C |
| 1  | 220440181 | 220440181 | + | G | G |
| 11 | 108383146 | 108383146 | + | G | G |
| 9  | 73296495  | 73296495  | + | C | C |
| 5  | 26903835  | 26903835  | + | C | C |
| 20 | 5282919   | 5282919   | + | C | C |
| 3  | 151165382 | 151165382 | + | G | G |
| 2  | 179590358 | 179590358 | + | G | G |
| 2  | 97494862  | 97494862  | + | A | A |
| 6  | 93967818  | 93967818  | + | T | T |
| 21 | 45876851  | 45876851  | + | C | C |
| 19 | 46195232  | 46195232  | + | G | G |
| 12 | 13716136  | 13716136  | + | C | C |
| 4  | 114823685 | 114823685 | + | G | G |
| 2  | 122122640 | 122122640 | + | G | G |
| 19 | 9071642   | 9071642   | + | C | C |
| 19 | 50243101  | 50243101  | + | C | C |
| 8  | 22054821  | 22054821  | + | C | C |
| 12 | 21331569  | 21331569  | + | C | C |
| 10 | 50953934  | 50953934  | + | C | C |
| 2  | 70900052  | 70900052  | + | C | C |
| 3  | 101570969 | 101570969 | + | C | C |
| 19 | 58046621  | 58046621  | + | C | C |
| 19 | 4216357   | 4216357   | + | T | T |
| 16 | 24372887  | 24372887  | + | G | G |
| X  | 50376561  | 50376561  | + | G | G |
| 12 | 22211503  | 22211503  | + | C | C |
| 16 | 71218807  | 71218807  | + | G | G |
| 19 | 44470135  | 44470135  | + | T | T |
| 8  | 55537919  | 55537919  | + | G | G |
| 9  | 79117322  | 79117322  | + | A | A |
| 2  | 73678152  | 73678152  | + | C | C |

|    |           |           |   |   |   |
|----|-----------|-----------|---|---|---|
| 1  | 177030374 | 177030374 | + | G | G |
| 10 | 38651223  | 38651223  | + | C | C |
| 1  | 241519070 | 241519070 | + | G | G |
| 11 | 130784184 | 130784184 | + | G | G |
| 3  | 129546884 | 129546884 | + | G | G |
| 19 | 49392767  | 49392767  | + | C | C |
| 19 | 17780392  | 17780392  | + | G | G |
| 4  | 102981537 | 102981537 | + | G | G |
| 7  | 20725345  | 20725345  | + | G | G |
| 10 | 98386627  | 98386627  | + | G | G |
| X  | 3228070   | 3228070   | + | G | G |
| 2  | 27677256  | 27677256  | + | G | G |
| 15 | 78211445  | 78211445  | + | G | G |
| 11 | 55579696  | 55579696  | + | C | C |
| 11 | 118343214 | 118343214 | + | C | C |
| X  | 140995671 | 140995671 | + | G | G |
| 19 | 20748611  | 20748611  | + | C | C |
| 11 | 104778296 | 104778296 | + | G | G |
| 5  | 140221407 | 140221407 | + | G | G |
| 1  | 212799511 | 212799511 | + | G | G |
| 2  | 75899102  | 75899102  | + | C | C |
| 8  | 104513106 | 104513106 | + | C | C |
| 3  | 98235530  | 98235530  | + | G | G |
| 14 | 20404532  | 20404532  | + | C | C |
| 6  | 135769571 | 135769571 | + | G | G |
| 19 | 10791060  | 10791060  | + | A | A |
| 2  | 196822079 | 196822079 | + | C | C |
| 22 | 39418850  | 39418850  | + | G | G |
| X  | 140993772 | 140993772 | + | C | C |
| 1  | 108231050 | 108231050 | + | G | G |
| 16 | 47627438  | 47627438  | + | C | C |
| 1  | 158817570 | 158817570 | + | C | C |
| 10 | 21104538  | 21104538  | + | G | G |
| 13 | 24465783  | 24465783  | + | G | G |
| 22 | 25756139  | 25756139  | + | G | G |
| 4  | 107845207 | 107845207 | + | G | G |
| 1  | 247875780 | 247875780 | + | G | G |
| 8  | 77763831  | 77763831  | + | C | C |
| 5  | 180622519 | 180622519 | + | C | C |
| 11 | 5602280   | 5602280   | + | C | C |
| 16 | 20471460  | 20471460  | + | G | G |
| 9  | 123900900 | 123900900 | + | C | C |
| 11 | 40136700  | 40136700  | + | C | C |

|    |           |           |   |   |   |
|----|-----------|-----------|---|---|---|
| 16 | 28878248  | 28878248  | + | C | C |
| 19 | 9066450   | 9066450   | + | G | G |
| 13 | 24823703  | 24823703  | + | C | C |
| 12 | 13906828  | 13906828  | + | G | G |
| 11 | 104897713 | 104897713 | + | G | G |
| 2  | 220354588 | 220354588 | + | C | C |
| 18 | 58038909  | 58038909  | + | C | C |
| 6  | 166836756 | 166836756 | + | G | G |
| 11 | 56950105  | 56950105  | + | C | C |
| X  | 119575584 | 119575584 | + | C | C |
| 1  | 186097297 | 186097297 | + | C | C |
| 1  | 196920153 | 196920153 | + | C | C |
| 1  | 44433112  | 44433112  | + | C | C |
| 20 | 62320409  | 62320409  | + | C | C |
| 16 | 53337812  | 53337812  | + | C | C |
| 22 | 18301381  | 18301381  | + | G | G |
| 2  | 233273017 | 233273017 | + | G | G |
| 19 | 43762578  | 43762578  | + | G | G |
| 1  | 156085065 | 156085065 | + | G | G |
| 21 | 15538740  | 15538740  | + | C | C |
| 4  | 20734409  | 20734409  | + | C | C |
| 16 | 16180725  | 16180725  | + | C | C |
| 7  | 149557670 | 149557670 | + | C | C |
| 7  | 143807139 | 143807139 | + | C | C |
| 16 | 31073371  | 31073371  | + | G | G |
| 16 | 90162462  | 90162462  | + | A | A |
| 14 | 38723753  | 38723753  | + | C | C |
| 6  | 11105541  | 11105541  | + | C | C |
| 21 | 42842601  | 42842601  | + | G | G |
| 19 | 39104725  | 39104725  | + | C | C |
| 1  | 3647537   | 3647537   | + | C | C |
| 5  | 137680547 | 137680547 | + | C | C |
| 10 | 106153205 | 106153205 | + | G | G |
| 1  | 44433089  | 44433089  | + | G | G |
| 2  | 166900406 | 166900406 | + | C | C |
| 4  | 71510512  | 71510512  | + | C | C |
| 21 | 45547947  | 45547947  | + | T | T |
| 14 | 94780446  | 94780446  | + | C | C |
| 19 | 501749    | 501749    | + | G | G |
| 5  | 71490226  | 71490226  | + | C | C |
| 7  | 86415865  | 86415865  | + | C | C |
| 1  | 70504773  | 70504773  | + | C | C |
| 7  | 33054330  | 33054330  | + | G | G |

|    |           |           |   |   |   |
|----|-----------|-----------|---|---|---|
| 19 | 1986458   | 1986458   | + | G | G |
| 6  | 130465700 | 130465700 | + | C | C |
| 19 | 9959829   | 9959829   | + | C | C |
| 16 | 28549369  | 28549369  | + | C | C |
| 2  | 179417213 | 179417213 | + | C | C |
| 11 | 18322414  | 18322414  | + | G | G |
| 8  | 125568509 | 125568509 | + | C | C |
| 12 | 132529364 | 132529364 | + | C | C |
| 5  | 23526506  | 23526506  | + | C | C |
| 1  | 157516856 | 157516856 | + | G | G |
| 2  | 242036662 | 242036662 | + | A | A |
| 5  | 156566188 | 156566188 | + | G | G |
| 20 | 47265850  | 47265850  | + | G | G |
| 12 | 70925930  | 70925930  | + | C | C |
| 15 | 54025275  | 54025275  | + | C | C |
| 2  | 28268649  | 28268649  | + | C | C |
| 18 | 61322891  | 61322891  | + | C | C |
| 2  | 85048999  | 85048999  | + | C | C |
| 8  | 23301441  | 23301441  | + | G | G |
| 7  | 86394513  | 86394513  | + | G | G |
| 6  | 7405582   | 7405582   | + | C | C |
| 11 | 55110739  | 55110739  | + | G | G |
| 12 | 132335539 | 132335539 | + | G | G |
| 15 | 79339330  | 79339330  | + | G | G |
| 12 | 53451853  | 53451853  | + | G | G |
| 6  | 128320017 | 128320017 | + | G | G |
| 19 | 55597474  | 55597474  | + | G | G |
| 14 | 60977905  | 60977905  | + | C | C |
| 1  | 25611218  | 25611218  | + | C | C |
| 15 | 31197682  | 31197682  | + | G | G |
| 10 | 124320292 | 124320292 | + | G | G |
| 7  | 34698146  | 34698146  | + | G | G |
| 2  | 44586689  | 44586689  | + | G | G |
| 3  | 49067986  | 49067986  | + | G | G |
| 9  | 79320922  | 79320922  | + | G | G |
| 15 | 41961464  | 41961464  | + | C | C |
| 11 | 7949901   | 7949901   | + | G | G |
| 11 | 5878114   | 5878114   | + | G | G |
| 10 | 35437404  | 35437404  | + | C | C |
| 12 | 55357590  | 55357590  | + | G | G |
| 10 | 60556207  | 60556207  | + | C | C |
| 1  | 247978198 | 247978198 | + | C | C |
| 16 | 67694198  | 67694198  | + | G | G |



|    |           |           |   |   |   |
|----|-----------|-----------|---|---|---|
| 11 | 60783254  | 60783254  | + | A | A |
| 1  | 16558540  | 16558540  | + | G | G |
| 6  | 12125170  | 12125170  | + | C | C |
| 2  | 141607740 | 141607740 | + | C | C |
| 11 | 45832757  | 45832757  | + | C | C |
| 14 | 101493518 | 101493518 | + | C | C |
| 11 | 4843507   | 4843507   | + | C | C |
| 16 | 22330181  | 22330181  | + | C | C |
| 6  | 130762228 | 130762228 | + | C | C |
| 15 | 50158552  | 50158552  | + | G | G |
| 1  | 41223804  | 41223804  | + | C | C |
| 15 | 99669644  | 99669644  | + | G | G |
| 11 | 31284399  | 31284399  | + | C | C |
| 1  | 110882883 | 110882883 | + | G | G |
| 12 | 11214063  | 11214063  | + | G | G |
| 10 | 50943142  | 50943142  | + | C | C |
| 8  | 86389478  | 86389478  | + | G | G |
| 12 | 99201670  | 99201670  | + | C | C |
| 20 | 18449620  | 18449620  | + | G | G |
| 3  | 118867052 | 118867052 | + | G | G |
| 3  | 184022170 | 184022170 | + | C | C |
| X  | 105449650 | 105449650 | + | G | G |
| 6  | 152776647 | 152776647 | + | G | G |
| 4  | 3209076   | 3209076   | + | C | C |
| 19 | 57286283  | 57286283  | + | G | G |
| 9  | 132565669 | 132565669 | + | G | G |
| 9  | 131386723 | 131386723 | + | C | C |
| 19 | 53669091  | 53669091  | + | G | G |
| 8  | 3224752   | 3224752   | + | G | G |
| 9  | 130152926 | 130152926 | + | C | C |
| 3  | 16268865  | 16268865  | + | G | G |
| 17 | 59885947  | 59885947  | + | C | C |
| 3  | 123452713 | 123452713 | + | G | G |
| 4  | 106861719 | 106861719 | + | G | G |
| 10 | 106907389 | 106907389 | + | C | C |
| 18 | 61324136  | 61324136  | + | C | C |
| 14 | 102452718 | 102452718 | + | C | C |
| 6  | 75797372  | 75797372  | + | G | G |
| 4  | 420066    | 420066    | + | G | G |
| 6  | 43402443  | 43402443  | + | C | C |
| 14 | 23421653  | 23421653  | + | G | G |
| 14 | 23559813  | 23559813  | + | G | G |
| 6  | 143081591 | 143081591 | + | G | G |

|    |           |           |   |   |   |
|----|-----------|-----------|---|---|---|
| 2  | 29451796  | 29451796  | + | C | C |
| 22 | 42423096  | 42423096  | + | G | G |
| 17 | 12847501  | 12847501  | + | G | G |
| 9  | 124329454 | 124329454 | + | G | G |
| 13 | 99364170  | 99364170  | + | C | C |
| 7  | 48965279  | 48965279  | + | C | C |
| 14 | 106471275 | 106471275 | + | C | C |
| 12 | 117768166 | 117768166 | + | C | C |
| 16 | 9858113   | 9858113   | + | C | C |
| 16 | 55880750  | 55880750  | + | C | C |
| 16 | 76482682  | 76482682  | + | C | C |
| 17 | 39778773  | 39778773  | + | G | G |
| 11 | 58206903  | 58206903  | + | G | G |
| 12 | 57003703  | 57003703  | + | C | C |
| 19 | 56918397  | 56918397  | + | C | C |
| 19 | 57931927  | 57931927  | + | G | G |
| 16 | 14029452  | 14029452  | + | C | C |
| 19 | 36593019  | 36593019  | + | C | C |
| 12 | 122413577 | 122413577 | + | C | C |
| 17 | 55962751  | 55962751  | + | G | G |
| 8  | 132002765 | 132002765 | + | G | G |
| X  | 80185456  | 80185456  | + | C | C |
| 19 | 58579901  | 58579901  | + | A | A |
| 2  | 220326718 | 220326718 | + | C | C |
| 4  | 42122153  | 42122153  | + | C | C |
| 1  | 26691602  | 26691602  | + | G | G |
| 19 | 49005750  | 49005750  | + | C | C |
| 2  | 48958410  | 48958410  | + | C | C |
| 19 | 9061016   | 9061016   | + | G | G |
| 9  | 90747912  | 90747912  | + | C | C |
| 9  | 124535098 | 124535098 | + | C | C |
| 12 | 21472419  | 21472419  | + | C | C |
| X  | 141290979 | 141290979 | + | G | G |
| 12 | 130898849 | 130898849 | + | C | C |
| 6  | 159670137 | 159670137 | + | G | G |
| 1  | 162743342 | 162743342 | + | G | G |
| X  | 12904184  | 12904184  | + | G | G |
| 1  | 190423812 | 190423812 | + | C | C |
| 6  | 154439990 | 154439990 | + | C | C |
| 19 | 50210795  | 50210795  | + | C | C |
| 7  | 143047560 | 143047560 | + | C | C |
| 5  | 182179    | 182179    | + | G | G |
| 7  | 103202284 | 103202284 | + | C | C |

|    |           |           |   |   |   |
|----|-----------|-----------|---|---|---|
| 6  | 76023061  | 76023061  | + | C | C |
| 15 | 38988857  | 38988857  | + | C | C |
| 16 | 21771906  | 21771906  | + | A | A |
| 15 | 22849179  | 22849179  | + | C | C |
| 3  | 46006610  | 46006610  | + | C | C |
| 11 | 16816105  | 16816105  | + | C | C |
| 12 | 7843181   | 7843181   | + | C | C |
| 19 | 19312988  | 19312988  | + | G | G |
| 15 | 65744334  | 65744334  | + | C | C |
| 2  | 232262493 | 232262493 | + | C | C |
| 3  | 170141034 | 170141034 | + | C | C |
| 1  | 15798551  | 15798551  | + | G | G |
| 19 | 9059328   | 9059328   | + | G | G |
| 1  | 248684989 | 248684989 | + | C | C |
| 3  | 37476525  | 37476525  | + | G | G |
| 14 | 22309454  | 22309454  | + | C | C |
| 15 | 94942254  | 94942254  | + | G | G |
| 11 | 73021881  | 73021881  | + | C | C |
| 12 | 47170697  | 47170697  | + | T | T |
| 3  | 49568937  | 49568937  | + | C | C |
| 11 | 59857890  | 59857890  | + | G | G |
| 8  | 30469916  | 30469916  | + | G | G |
| 1  | 57537993  | 57537993  | + | C | C |
| 1  | 82416074  | 82416074  | + | G | G |
| 2  | 108881292 | 108881292 | + | G | G |
| 1  | 228362558 | 228362558 | + | C | C |
| 2  | 228172462 | 228172462 | + | G | G |
| 12 | 13720049  | 13720049  | + | G | G |
| 1  | 21071307  | 21071307  | + | A | A |
| 16 | 19451408  | 19451408  | + | C | C |
| 16 | 74919690  | 74919690  | + | G | G |
| 2  | 196825552 | 196825552 | + | C | C |
| 15 | 40662069  | 40662069  | + | C | C |
| 1  | 43055362  | 43055362  | + | G | G |
| 11 | 6221124   | 6221124   | + | G | G |
| 2  | 3447563   | 3447563   | + | C | C |
| 15 | 43237412  | 43237412  | + | G | G |
| 15 | 45047370  | 45047370  | + | C | C |
| 4  | 146059265 | 146059265 | + | C | C |
| 12 | 7362836   | 7362836   | + | C | C |
| 9  | 131810777 | 131810777 | + | G | G |
| 15 | 24921643  | 24921643  | + | G | G |
| 2  | 36805861  | 36805861  | + | G | G |

|    |           |           |   |   |   |
|----|-----------|-----------|---|---|---|
| 1  | 151090482 | 151090482 | + | G | G |
| 21 | 32639202  | 32639202  | + | G | G |
| X  | 73962481  | 73962481  | + | C | C |
| X  | 63444876  | 63444876  | + | G | G |
| 17 | 40970286  | 40970286  | + | G | G |
| 19 | 15291065  | 15291065  | + | C | C |
| 6  | 129796538 | 129796538 | + | G | G |
| 19 | 10625472  | 10625472  | + | G | G |
| 9  | 131027934 | 131027934 | + | G | G |
| 17 | 62238212  | 62238212  | + | C | C |
| 1  | 220971364 | 220971364 | + | T | T |
| 2  | 168105143 | 168105143 | + | G | G |
| 12 | 53004994  | 53004994  | + | C | C |
| 6  | 74325120  | 74325120  | + | G | G |
| X  | 19367437  | 19367437  | + | G | G |
| 14 | 70924259  | 70924259  | + | C | C |
| 16 | 29974450  | 29974450  | + | C | C |
| 17 | 26125776  | 26125776  | + | C | C |
| 11 | 5411157   | 5411157   | + | G | G |
| 22 | 42536613  | 42536613  | + | G | G |
| 14 | 60945082  | 60945082  | + | G | G |
| 16 | 19191859  | 19191859  | + | C | C |
| 19 | 44892058  | 44892058  | + | G | G |
| 9  | 134070655 | 134070655 | + | C | C |
| 16 | 2546845   | 2546845   | + | C | C |
| 14 | 106405713 | 106405713 | + | C | C |
| 17 | 73727985  | 73727985  | + | G | G |
| 18 | 6171916   | 6171916   | + | T | T |
| 6  | 71269418  | 71269418  | + | G | G |
| 1  | 36026255  | 36026255  | + | G | G |
| 1  | 201031218 | 201031218 | + | C | C |
| 16 | 72984776  | 72984776  | + | C | C |
| 14 | 106967150 | 106967150 | + | G | G |
| X  | 79281148  | 79281148  | + | C | C |
| 6  | 31085224  | 31085224  | + | G | G |
| 12 | 117662886 | 117662886 | + | G | G |
| 14 | 63447604  | 63447604  | + | C | C |
| 19 | 43679467  | 43679467  | + | G | G |
| 6  | 43267736  | 43267736  | + | G | G |
| 6  | 28116500  | 28116500  | + | G | G |
| X  | 140993785 | 140993785 | + | C | C |
| 19 | 39421403  | 39421403  | + | C | C |
| 21 | 41137554  | 41137554  | + | G | G |

|    |           |           |   |   |   |
|----|-----------|-----------|---|---|---|
| 14 | 22392585  | 22392585  | + | G | G |
| 5  | 83360620  | 83360620  | + | G | G |
| 8  | 102564946 | 102564946 | + | C | C |
| 9  | 71503934  | 71503934  | + | A | A |
| 7  | 128445926 | 128445926 | + | C | C |
| 22 | 32588965  | 32588965  | + | C | C |
| 16 | 53337811  | 53337811  | + | C | C |
| 9  | 87359943  | 87359943  | + | C | C |
| 3  | 49897633  | 49897633  | + | C | C |
| 7  | 139226784 | 139226784 | + | C | C |
| 13 | 84455508  | 84455508  | + | C | C |
| 12 | 30833514  | 30833514  | + | G | G |
| 1  | 39798313  | 39798313  | + | G | G |
| 6  | 123824996 | 123824996 | + | C | C |
| 1  | 55051508  | 55051508  | + | C | C |
| 6  | 37186304  | 37186304  | + | C | C |
| 11 | 57004463  | 57004463  | + | C | C |
| 14 | 96707397  | 96707397  | + | G | G |
| 19 | 51192473  | 51192473  | + | G | G |
| 2  | 214160794 | 214160794 | + | C | C |
| 16 | 18434236  | 18434236  | + | G | G |
| 1  | 160458996 | 160458996 | + | G | G |
| 19 | 45317471  | 45317471  | + | G | G |
| 18 | 67860617  | 67860617  | + | G | G |
| 19 | 4891574   | 4891574   | + | G | G |
| 12 | 116418624 | 116418624 | + | C | C |
| 1  | 150298300 | 150298300 | + | C | C |
| 4  | 109817848 | 109817848 | + | C | C |
| 1  | 248458221 | 248458221 | + | G | G |
| 2  | 220326719 | 220326719 | + | C | C |
| 12 | 49994529  | 49994529  | + | C | C |
| 8  | 76459858  | 76459858  | + | G | G |
| 2  | 168725528 | 168725528 | + | G | G |
| 1  | 118424453 | 118424453 | + | G | G |
| 19 | 48893838  | 48893838  | + | C | C |
| X  | 48419132  | 48419132  | + | C | C |
| 20 | 43850046  | 43850046  | + | C | C |
| 17 | 5042421   | 5042421   | + | C | C |
| 18 | 70451099  | 70451099  | + | C | C |
| 11 | 56510600  | 56510600  | + | G | G |
| 17 | 26919171  | 26919171  | + | G | G |
| 7  | 120385840 | 120385840 | + | G | G |
| X  | 140994100 | 140994100 | + | C | C |

|    |           |           |   |   |   |
|----|-----------|-----------|---|---|---|
| 6  | 107035663 | 107035663 | + | C | C |
| 3  | 42674144  | 42674144  | + | C | C |
| 14 | 26917416  | 26917416  | + | C | C |
| 2  | 234975179 | 234975179 | + | G | G |
| 14 | 94394562  | 94394562  | + | C | C |
| 15 | 79755521  | 79755521  | + | C | C |
| 13 | 101844283 | 101844283 | + | A | A |
| 3  | 54952861  | 54952861  | + | G | G |
| 7  | 104773510 | 104773510 | + | G | G |
| 10 | 52390468  | 52390468  | + | C | C |
| 5  | 67591463  | 67591463  | + | C | C |
| 1  | 104160213 | 104160213 | + | G | G |
| 5  | 71756757  | 71756757  | + | G | G |
| 5  | 79335938  | 79335938  | + | C | C |
| 13 | 51417407  | 51417407  | + | C | C |
| 18 | 29793236  | 29793236  | + | C | C |
| 1  | 170043674 | 170043674 | + | G | G |
| 14 | 22476305  | 22476305  | + | G | G |
| 17 | 39296316  | 39296316  | + | G | G |
| 18 | 29126230  | 29126230  | + | C | C |
| 7  | 48520735  | 48520735  | + | C | C |
| 7  | 148963466 | 148963466 | + | C | C |
| 19 | 19748323  | 19748323  | + | G | G |
| 5  | 56509996  | 56509996  | + | C | C |
| 1  | 43891768  | 43891768  | + | G | G |
| 2  | 27455407  | 27455407  | + | C | C |
| 10 | 64239657  | 64239657  | + | G | G |
| 3  | 141328717 | 141328717 | + | A | A |
| 8  | 2830798   | 2830798   | + | C | C |
| 19 | 43023081  | 43023081  | + | G | G |
| 3  | 48310052  | 48310052  | + | C | C |
| 14 | 39816919  | 39816919  | + | G | G |
| 13 | 19999943  | 19999943  | + | C | C |
| 21 | 32508358  | 32508358  | + | A | A |
| 15 | 40660705  | 40660705  | + | G | G |
| 2  | 133540902 | 133540902 | + | C | C |
| 17 | 39974702  | 39974702  | + | G | G |
| 1  | 156452277 | 156452277 | + | C | C |
| 12 | 6428076   | 6428076   | + | C | C |
| X  | 41205622  | 41205622  | + | C | C |
| 14 | 23391693  | 23391693  | + | G | G |
| 15 | 59192089  | 59192089  | + | G | G |
| 18 | 48256263  | 48256263  | + | C | C |

|    |           |           |   |   |   |
|----|-----------|-----------|---|---|---|
| 6  | 64394356  | 64394356  | + | G | G |
| 1  | 34166132  | 34166132  | + | C | C |
| 2  | 109527343 | 109527343 | + | C | C |
| 20 | 50769024  | 50769024  | + | G | G |
| 15 | 37385908  | 37385908  | + | G | G |
| 7  | 87782580  | 87782580  | + | G | G |
| 2  | 28748152  | 28748152  | + | G | G |
| 1  | 231471701 | 231471701 | + | C | C |
| 2  | 179590122 | 179590122 | + | C | C |
| 4  | 100201389 | 100201389 | + | G | G |
| 19 | 45766396  | 45766396  | + | C | C |
| 6  | 134349843 | 134349843 | + | G | G |
| 1  | 12065840  | 12065840  | + | C | C |
| 1  | 152759992 | 152759992 | + | G | G |
| 17 | 26890900  | 26890900  | + | G | G |
| 6  | 108066180 | 108066180 | + | C | C |
| 12 | 41365416  | 41365416  | + | C | C |
| 9  | 14759812  | 14759812  | + | G | G |
| 6  | 27806675  | 27806675  | + | C | C |
| 1  | 157771850 | 157771850 | + | G | G |
| 12 | 9464362   | 9464362   | + | C | C |
| 17 | 30348945  | 30348945  | + | C | C |
| 19 | 42854399  | 42854399  | + | C | C |
| 19 | 49539498  | 49539498  | + | C | C |
| 19 | 19241078  | 19241078  | + | G | G |
| 18 | 29847988  | 29847988  | + | G | G |
| 18 | 23658081  | 23658081  | + | T | T |
| 18 | 51729260  | 51729260  | + | G | G |
| 14 | 81744353  | 81744353  | + | G | G |
| 6  | 116599692 | 116599692 | + | G | G |
| 3  | 43121112  | 43121112  | + | G | G |
| 1  | 62367032  | 62367032  | + | G | G |
| 1  | 114424557 | 114424557 | + | G | G |
| X  | 36103600  | 36103600  | + | G | G |
| 11 | 26720076  | 26720076  | + | C | C |
| 12 | 10978085  | 10978085  | + | C | C |
| 22 | 31583187  | 31583187  | + | C | C |
| 2  | 227920728 | 227920728 | + | G | G |
| 7  | 6449897   | 6449897   | + | C | C |
| 5  | 13841216  | 13841216  | + | C | C |
| 6  | 41126749  | 41126749  | + | C | C |
| X  | 12736608  | 12736608  | + | C | C |
| 12 | 20806887  | 20806887  | + | G | G |

|    |           |           |   |   |   |
|----|-----------|-----------|---|---|---|
| 19 | 13565990  | 13565990  | + | C | C |
| X  | 295242    | 295242    | + | C | C |
| 11 | 5142008   | 5142008   | + | C | C |
| 16 | 76528909  | 76528909  | + | G | G |
| X  | 79698321  | 79698321  | + | G | G |
| 2  | 100210323 | 100210323 | + | G | G |
| 20 | 45607244  | 45607244  | + | G | G |
| 2  | 21234694  | 21234694  | + | C | C |
| 6  | 32024669  | 32024669  | + | C | C |
| 8  | 144803824 | 144803824 | + | C | C |
| 2  | 238725650 | 238725650 | + | C | C |
| 12 | 15134529  | 15134529  | + | G | G |
| 13 | 41345346  | 41345346  | + | C | C |
| 3  | 47604328  | 47604328  | + | G | G |
| 6  | 16145201  | 16145201  | + | C | C |
| 5  | 120022314 | 120022314 | + | C | C |
| 1  | 95310932  | 95310932  | + | C | C |
| 6  | 138576710 | 138576710 | + | G | G |
| 7  | 100349877 | 100349877 | + | C | C |
| 12 | 80730315  | 80730315  | + | G | G |
| X  | 17819867  | 17819867  | + | C | C |
| 10 | 129874891 | 129874891 | + | A | A |
| 7  | 25266443  | 25266443  | + | C | C |
| 3  | 154055964 | 154055964 | + | C | C |
| 3  | 89499371  | 89499371  | + | G | G |
| 2  | 113676355 | 113676355 | + | C | C |
| 12 | 120966909 | 120966909 | + | A | A |
| 16 | 71113830  | 71113830  | + | G | G |
| 11 | 16256174  | 16256174  | + | T | T |
| 6  | 40399736  | 40399736  | + | C | C |
| 1  | 156452276 | 156452276 | + | C | C |
| 10 | 103370992 | 103370992 | + | G | G |
| 15 | 65627198  | 65627198  | + | C | C |
| 19 | 38976452  | 38976452  | + | C | C |
| 17 | 27807478  | 27807478  | + | C | C |
| 20 | 8637881   | 8637881   | + | C | C |
| 3  | 98235531  | 98235531  | + | G | G |
| 1  | 171073082 | 171073082 | + | G | G |
| 19 | 10791061  | 10791061  | + | C | C |
| 1  | 201043646 | 201043646 | + | C | C |
| 22 | 38167773  | 38167773  | + | C | C |
| 19 | 12780529  | 12780529  | + | C | C |
| 1  | 108231049 | 108231049 | + | G | G |



|    |           |           |   |   |   |
|----|-----------|-----------|---|---|---|
| 1  | 158227519 | 158227519 | + | G | G |
| 15 | 85664241  | 85664241  | + | G | G |
| 1  | 175914109 | 175914109 | + | C | C |
| 11 | 7693727   | 7693727   | + | G | G |
| 2  | 95846006  | 95846006  | + | G | G |
| 5  | 153190618 | 153190618 | + | G | G |
| 2  | 179606494 | 179606494 | + | G | G |
| 12 | 32134236  | 32134236  | + | A | A |
| 9  | 72723222  | 72723222  | + | C | C |
| 19 | 7807978   | 7807978   | + | C | C |
| 19 | 52888223  | 52888223  | + | T | T |
| 18 | 14478132  | 14478132  | + | G | G |
| 6  | 90605489  | 90605489  | + | C | C |
| 2  | 29443635  | 29443635  | + | G | G |
| 2  | 132202187 | 132202187 | + | C | C |
| 16 | 84217311  | 84217311  | + | G | G |
| 3  | 19575143  | 19575143  | + | G | G |
| X  | 132160738 | 132160738 | + | G | G |
| 16 | 68405567  | 68405567  | + | G | G |
| 7  | 99305585  | 99305585  | + | C | C |
| 7  | 103338321 | 103338321 | + | G | G |
| 14 | 71199292  | 71199292  | + | G | G |
| X  | 302204    | 302204    | + | C | C |
| 3  | 52857935  | 52857935  | + | G | G |
| 2  | 222437007 | 222437007 | + | C | C |
| 7  | 100685708 | 100685708 | + | C | C |
| 12 | 129442134 | 129442134 | + | G | G |
| 1  | 172007480 | 172007480 | + | G | G |
| 22 | 42078510  | 42078510  | + | C | C |
| 3  | 35730834  | 35730834  | + | G | G |
| 6  | 7231965   | 7231965   | + | C | C |
| 17 | 44953934  | 44953934  | + | G | G |
| 3  | 139062829 | 139062829 | + | C | C |
| 12 | 6643965   | 6643965   | + | C | C |
| 11 | 18741391  | 18741391  | + | C | C |
| 8  | 142367518 | 142367518 | + | G | G |
| 1  | 231473369 | 231473369 | + | G | G |
| 18 | 77895176  | 77895176  | + | C | C |
| 19 | 15290960  | 15290960  | + | C | C |
| 18 | 67742743  | 67742743  | + | G | G |
| 14 | 26917496  | 26917496  | + | T | T |
| 11 | 1501703   | 1501703   | + | G | G |
| 4  | 169300899 | 169300899 | + | G | G |

|    |           |           |   |   |   |
|----|-----------|-----------|---|---|---|
| 7  | 151962259 | 151962259 | + | G | G |
| X  | 84525226  | 84525226  | + | C | C |
| 1  | 109795735 | 109795735 | + | C | C |
| 12 | 112669342 | 112669342 | + | G | G |
| 15 | 45656209  | 45656209  | + | G | G |
| 5  | 140256124 | 140256124 | + | C | C |
| 14 | 21789626  | 21789626  | + | G | G |
| 13 | 96212484  | 96212484  | + | G | G |
| X  | 154132689 | 154132689 | + | G | G |
| 12 | 46242618  | 46242618  | + | G | G |
| 17 | 80788089  | 80788089  | + | C | C |
| 2  | 236945299 | 236945299 | + | C | C |
| 8  | 124992923 | 124992923 | + | G | G |
| 7  | 150217488 | 150217488 | + | C | C |
| 4  | 156643314 | 156643314 | + | G | G |
| 2  | 135781096 | 135781096 | + | C | C |
| 4  | 90856775  | 90856775  | + | C | C |
| 2  | 119915287 | 119915287 | + | G | G |
| 4  | 110615699 | 110615699 | + | G | G |
| 4  | 153875388 | 153875388 | + | G | G |
| 12 | 21036390  | 21036390  | + | C | C |
| 7  | 1518506   | 1518506   | + | C | C |
| X  | 154348304 | 154348304 | + | C | C |
| 11 | 89819919  | 89819919  | + | C | C |
| X  | 3240917   | 3240917   | + | C | C |
| 19 | 9325061   | 9325061   | + | G | G |
| 22 | 37770435  | 37770435  | + | C | C |
| 16 | 57060642  | 57060642  | + | T | T |
| 16 | 27357869  | 27357869  | + | C | C |
| 6  | 107595376 | 107595376 | + | G | G |
| 10 | 24508825  | 24508825  | + | G | G |
| 20 | 32258495  | 32258495  | + | G | G |
| 10 | 27964298  | 27964298  | + | C | C |
| 9  | 104357027 | 104357027 | + | G | G |
| 3  | 122427094 | 122427094 | + | C | C |
| 2  | 227945221 | 227945221 | + | C | C |
| 2  | 213291063 | 213291063 | + | C | C |
| 7  | 76144447  | 76144447  | + | C | C |
| 12 | 15134530  | 15134530  | + | G | G |
| 11 | 30915805  | 30915805  | + | C | C |
| 16 | 52484408  | 52484408  | + | G | G |
| 8  | 113960062 | 113960062 | + | G | G |
| 19 | 54802614  | 54802614  | + | C | C |

|    |           |           |   |   |   |
|----|-----------|-----------|---|---|---|
| 8  | 143607941 | 143607941 | + | C | C |
| 19 | 9959830   | 9959830   | + | C | C |
| 4  | 77020234  | 77020234  | + | C | C |
| 1  | 207791530 | 207791530 | + | G | G |
| 7  | 30672031  | 30672031  | + | C | C |
| 15 | 90631707  | 90631707  | + | G | G |
| 7  | 143793023 | 143793023 | + | C | C |
| 19 | 6981726   | 6981726   | + | C | C |
| 6  | 38893978  | 38893978  | + | G | G |
| 11 | 117982545 | 117982545 | + | G | G |
| 19 | 49850501  | 49850501  | + | G | G |
| 6  | 110763940 | 110763940 | + | C | C |
| 3  | 180334652 | 180334652 | + | C | C |
| 7  | 87076396  | 87076396  | + | G | G |
| 5  | 41196034  | 41196034  | + | G | G |
| 19 | 21719412  | 21719412  | + | C | C |
| 1  | 55224316  | 55224316  | + | G | G |
| 1  | 158746763 | 158746763 | + | G | G |
| 14 | 65262253  | 65262253  | + | C | C |
| 20 | 5574016   | 5574016   | + | G | G |
| 2  | 167136920 | 167136920 | + | C | C |
| 7  | 150499353 | 150499353 | + | C | C |
| 2  | 179593743 | 179593743 | + | G | G |
| 18 | 61323223  | 61323223  | + | C | C |
| 4  | 42415007  | 42415007  | + | C | C |
| 2  | 185801846 | 185801846 | + | G | G |
| 17 | 78867528  | 78867528  | + | C | C |
| 16 | 70557448  | 70557448  | + | C | C |
| 3  | 48895122  | 48895122  | + | G | G |
| 8  | 110489463 | 110489463 | + | G | G |
| 5  | 115628177 | 115628177 | + | C | C |
| 7  | 123594243 | 123594243 | + | G | G |
| 16 | 89696902  | 89696902  | + | G | G |
| 18 | 50976952  | 50976952  | + | C | C |
| 12 | 49431835  | 49431835  | + | G | G |
| 17 | 38152438  | 38152438  | + | C | C |
| 19 | 48558258  | 48558258  | + | G | G |
| 4  | 163032514 | 163032514 | + | C | C |
| 12 | 123479427 | 123479427 | + | C | C |
| 1  | 110302422 | 110302422 | + | G | G |
| 18 | 9263815   | 9263815   | + | C | C |
| 1  | 157497421 | 157497421 | + | G | G |
| 19 | 56329275  | 56329275  | + | C | C |

|    |           |           |   |   |   |
|----|-----------|-----------|---|---|---|
| 19 | 36940264  | 36940264  | + | G | G |
| 1  | 91788710  | 91788710  | + | C | C |
| 4  | 110882045 | 110882045 | + | G | G |
| 21 | 38390253  | 38390253  | + | G | G |
| 19 | 43382142  | 43382142  | + | C | C |
| 1  | 66081761  | 66081761  | + | G | G |
| 8  | 24209511  | 24209511  | + | G | G |
| 1  | 229676434 | 229676434 | + | G | G |
| 3  | 64085414  | 64085414  | + | C | C |
| 1  | 144892398 | 144892398 | + | G | G |
| 19 | 4498841   | 4498841   | + | G | G |
| 15 | 33954385  | 33954385  | + | G | G |
| 20 | 41306717  | 41306717  | + | G | G |
| 11 | 66626491  | 66626491  | + | G | G |
| 16 | 2233716   | 2233716   | + | G | G |
| 15 | 65744335  | 65744335  | + | C | C |
| 11 | 3423084   | 3423084   | + | C | C |
| 3  | 77671493  | 77671493  | + | G | G |
| 14 | 59834291  | 59834291  | + | G | G |
| 19 | 56223206  | 56223206  | + | C | C |
| 2  | 228144580 | 228144580 | + | G | G |
| 19 | 19337619  | 19337619  | + | C | C |
| 1  | 179310307 | 179310307 | + | T | T |
| 10 | 22830783  | 22830783  | + | G | G |
| 7  | 141727431 | 141727431 | + | C | C |
| 4  | 75040301  | 75040301  | + | G | G |
| 19 | 43523042  | 43523042  | + | C | C |
| 4  | 69879842  | 69879842  | + | C | C |
| 20 | 55111361  | 55111361  | + | C | C |
| 19 | 51561890  | 51561890  | + | G | G |
| 1  | 205687496 | 205687496 | + | G | G |
| 1  | 21014186  | 21014186  | + | C | C |
| 9  | 139996026 | 139996026 | + | C | C |
| 3  | 132196944 | 132196944 | + | C | C |
| 2  | 238725649 | 238725649 | + | T | T |
| 10 | 75258660  | 75258660  | + | G | G |
| 4  | 154624117 | 154624117 | + | G | G |
| 1  | 157062719 | 157062719 | + | G | G |
| 6  | 151055190 | 151055190 | + | G | G |
| 19 | 15122185  | 15122185  | + | G | G |
| 2  | 186670720 | 186670720 | + | G | G |
| 11 | 59423164  | 59423164  | + | A | A |
| 1  | 248367040 | 248367040 | + | C | C |

|    |           |           |   |   |   |
|----|-----------|-----------|---|---|---|
| 16 | 18841005  | 18841005  | + | C | C |
| 13 | 95858855  | 95858855  | + | C | C |
| 14 | 94067098  | 94067098  | + | G | G |
| 11 | 60161379  | 60161379  | + | G | G |
| 8  | 67064800  | 67064800  | + | C | C |
| 2  | 232458422 | 232458422 | + | C | C |
| 1  | 161207992 | 161207992 | + | C | C |
| 2  | 222437006 | 222437006 | + | C | C |
| 15 | 74335405  | 74335405  | + | C | C |
| 15 | 38799974  | 38799974  | + | C | C |
| 7  | 72436495  | 72436495  | + | G | G |
| 6  | 129470130 | 129470130 | + | C | C |
| 4  | 145636458 | 145636458 | + | C | C |
| 4  | 55130038  | 55130038  | + | C | C |
| 4  | 126411760 | 126411760 | + | G | G |
| 17 | 37263712  | 37263712  | + | G | G |
| 1  | 43911605  | 43911605  | + | G | G |
| 17 | 56387377  | 56387377  | + | G | G |
| 3  | 15626825  | 15626825  | + | G | G |
| 1  | 150444180 | 150444180 | + | G | G |
| 4  | 121957872 | 121957872 | + | G | G |
| 1  | 160171059 | 160171059 | + | G | G |
| 12 | 7362835   | 7362835   | + | C | C |
| 16 | 21080865  | 21080865  | + | C | C |
| 4  | 82366897  | 82366897  | + | C | C |
| 22 | 43610220  | 43610220  | + | G | G |
| 14 | 70990320  | 70990320  | + | C | C |
| 1  | 177226497 | 177226497 | + | C | C |
| 11 | 59224605  | 59224605  | + | C | C |
| 9  | 94486802  | 94486802  | + | C | C |
| 11 | 71152323  | 71152323  | + | G | G |
| 12 | 5154651   | 5154651   | + | C | C |
| 19 | 17015328  | 17015328  | + | C | C |
| 5  | 156816328 | 156816328 | + | C | C |
| 12 | 11992229  | 11992229  | + | C | C |
| 13 | 39454695  | 39454695  | + | C | C |
| 12 | 105321789 | 105321789 | + | C | C |
| 20 | 23666441  | 23666441  | + | C | C |
| 7  | 18869090  | 18869090  | + | C | C |
| 6  | 131199370 | 131199370 | + | C | C |
| 20 | 48472006  | 48472006  | + | G | G |
| 1  | 2939000   | 2939000   | + | C | C |
| 19 | 56424425  | 56424425  | + | G | G |

|    |           |           |   |   |   |
|----|-----------|-----------|---|---|---|
| 22 | 25023359  | 25023359  | + | C | C |
| 15 | 65208036  | 65208036  | + | G | G |
| 4  | 77817832  | 77817832  | + | G | G |
| 8  | 35583750  | 35583750  | + | G | G |
| X  | 119575585 | 119575585 | + | C | C |
| 7  | 18066932  | 18066932  | + | A | A |
| 10 | 98182476  | 98182476  | + | G | G |
| 12 | 113543543 | 113543543 | + | G | G |
| 10 | 74684190  | 74684190  | + | G | G |
| 12 | 124092995 | 124092995 | + | C | C |
| 3  | 137843534 | 137843534 | + | G | G |
| 4  | 56471501  | 56471501  | + | G | G |
| 2  | 165947645 | 165947645 | + | C | C |
| 5  | 235524    | 235524    | + | C | C |
| 18 | 9931852   | 9931852   | + | C | C |
| 16 | 20976157  | 20976157  | + | G | G |
| 11 | 122756744 | 122756744 | + | C | C |
| 8  | 88298887  | 88298887  | + | C | C |
| 2  | 102641025 | 102641025 | + | T | T |
| 21 | 43708256  | 43708256  | + | C | C |
| 3  | 93780416  | 93780416  | + | C | C |
| 3  | 42906432  | 42906432  | + | C | C |
| 13 | 113772750 | 113772750 | + | G | G |
| 4  | 113298856 | 113298856 | + | C | C |
| 11 | 117233220 | 117233220 | + | C | C |
| 18 | 3450463   | 3450463   | + | C | C |
| 11 | 18327783  | 18327783  | + | T | T |
| 13 | 36202262  | 36202262  | + | C | C |
| 2  | 65540555  | 65540555  | + | G | G |
| 12 | 8329742   | 8329742   | + | C | C |
| 11 | 18743146  | 18743146  | + | C | C |
| 16 | 20873715  | 20873715  | + | C | C |
| 9  | 136298505 | 136298505 | + | C | C |
| 11 | 60161380  | 60161380  | + | G | G |
| 2  | 219612388 | 219612388 | + | C | C |
| 17 | 46846396  | 46846396  | + | G | G |
| 4  | 25316996  | 25316996  | + | C | C |
| 2  | 286297    | 286297    | + | G | G |
| 7  | 86542447  | 86542447  | + | G | G |
| 12 | 58089805  | 58089805  | + | A | A |
| 17 | 48680223  | 48680223  | + | G | G |
| 4  | 69796307  | 69796307  | + | C | C |
| 2  | 95464537  | 95464537  | + | G | G |

|    |           |           |   |   |   |
|----|-----------|-----------|---|---|---|
| 19 | 1207054   | 1207054   | + | A | A |
| 10 | 99344393  | 99344393  | + | T | T |
| 9  | 100693309 | 100693309 | + | G | G |
| 3  | 49395586  | 49395586  | + | G | G |
| 6  | 31079834  | 31079834  | + | G | G |
| 9  | 34709345  | 34709345  | + | C | C |
| 9  | 78710815  | 78710815  | + | G | G |
| 8  | 3081251   | 3081251   | + | C | C |
| 3  | 187088628 | 187088628 | + | C | C |
| 1  | 161017742 | 161017742 | + | C | C |
| 19 | 10561284  | 10561284  | + | C | C |
| 19 | 9236820   | 9236820   | + | C | C |
| 8  | 3267116   | 3267116   | + | C | C |
| 4  | 25005702  | 25005702  | + | C | C |
| 7  | 4185539   | 4185539   | + | G | G |
| 15 | 45656208  | 45656208  | + | G | G |
| X  | 54978411  | 54978411  | + | C | C |
| 16 | 21261577  | 21261577  | + | G | G |
| 8  | 110441591 | 110441591 | + | G | G |
| MT | 15196     | 15196     | + | A | A |
| 20 | 44170937  | 44170937  | + | G | G |
| 10 | 21129775  | 21129775  | + | C | C |
| 7  | 143098455 | 143098455 | + | C | C |
| 5  | 32074530  | 32074530  | + | C | C |
| 17 | 61762886  | 61762886  | + | C | C |
| 17 | 35506825  | 35506825  | + | G | G |
| 10 | 70652386  | 70652386  | + | G | G |
| 3  | 187386744 | 187386744 | + | C | C |
| 17 | 43344846  | 43344846  | + | G | G |
| 4  | 25316995  | 25316995  | + | C | C |
| 14 | 77273078  | 77273078  | + | G | G |
| 3  | 44952562  | 44952562  | + | G | G |
| 11 | 32636012  | 32636012  | + | C | C |
| 6  | 160169312 | 160169312 | + | C | C |
| 1  | 60505761  | 60505761  | + | G | G |
| 3  | 186333484 | 186333484 | + | G | G |
| 4  | 69111330  | 69111330  | + | G | G |
| 4  | 126373148 | 126373148 | + | C | C |
| 9  | 138590189 | 138590189 | + | G | G |
| 18 | 28908229  | 28908229  | + | G | G |
| 3  | 13401831  | 13401831  | + | T | T |
| 13 | 46730635  | 46730635  | + | G | G |
| 4  | 10444743  | 10444743  | + | G | G |

|    |           |           |   |   |   |
|----|-----------|-----------|---|---|---|
| 14 | 96706993  | 96706993  | + | C | C |
| 9  | 130477960 | 130477960 | + | C | C |
| 7  | 99027364  | 99027364  | + | C | C |
| 19 | 15739646  | 15739646  | + | G | G |
| 12 | 31291162  | 31291162  | + | C | C |
| 7  | 104773509 | 104773509 | + | G | G |
| 18 | 48256264  | 48256264  | + | C | C |
| 3  | 11078751  | 11078751  | + | C | C |
| 5  | 140476854 | 140476854 | + | C | C |
| 15 | 42743646  | 42743646  | + | G | G |
| 10 | 45935917  | 45935917  | + | C | C |
| X  | 118771033 | 118771033 | + | C | C |
| 15 | 82444604  | 82444604  | + | C | C |
| 8  | 55541536  | 55541536  | + | G | G |
| 20 | 15948276  | 15948276  | + | G | G |
| 2  | 233321993 | 233321993 | + | G | G |
| 14 | 101442227 | 101442227 | + | G | G |
| 18 | 40853568  | 40853568  | + | C | C |
| 2  | 228148547 | 228148547 | + | G | G |
| 4  | 175564977 | 175564977 | + | T | T |
| 19 | 57987128  | 57987128  | + | G | G |
| 8  | 68421774  | 68421774  | + | C | C |
| 2  | 87085445  | 87085445  | + | G | G |
| 11 | 11964312  | 11964312  | + | C | C |
| 19 | 33470912  | 33470912  | + | G | G |
| 8  | 42585787  | 42585787  | + | C | C |
| 13 | 111092165 | 111092165 | + | A | A |
| 19 | 9069346   | 9069346   | + | G | G |
| 7  | 73535297  | 73535297  | + | C | C |
| 19 | 57723489  | 57723489  | + | C | C |
| 19 | 9406365   | 9406365   | + | G | G |
| 10 | 50960254  | 50960254  | + | G | G |
| 19 | 54074932  | 54074932  | + | G | G |
| 1  | 21887162  | 21887162  | + | G | G |
| 4  | 1657255   | 1657255   | + | G | G |
| 2  | 70904896  | 70904896  | + | C | C |
| 8  | 38458673  | 38458673  | + | G | G |
| 8  | 22429881  | 22429881  | + | C | C |
| 7  | 100676261 | 100676261 | + | C | C |
| 9  | 115759424 | 115759424 | + | G | G |
| 4  | 20734408  | 20734408  | + | C | C |
| 4  | 44653638  | 44653638  | + | C | C |
| 14 | 102606400 | 102606400 | + | C | C |



|            |           |           |   |        |        |
|------------|-----------|-----------|---|--------|--------|
| 16         | 3293453   | 3293453   | + | C      | C      |
| 11         | 9519341   | 9519341   | + | C      | C      |
| 19         | 6678178   | 6678178   | + | C      | C      |
| 14         | 75190034  | 75190034  | + | C      | C      |
| 5          | 13776746  | 13776746  | + | C      | C      |
| 8          | 53085133  | 53085133  | + | C      | C      |
| 11         | 101323661 | 101323661 | + | A      | A      |
| 2          | 228148972 | 228148972 | + | G      | G      |
| 13         | 42874763  | 42874763  | + | C      | C      |
| 1          | 175106105 | 175106105 | + | G      | G      |
| 12         | 116429658 | 116429658 | + | C      | C      |
| 17         | 56274497  | 56274497  | + | G      | G      |
| 20         | 16485050  | 16485050  | + | G      | G      |
| 4          | 55955567  | 55955567  | + | C      | C      |
| 1          | 202097128 | 202097128 | + | C      | C      |
| 3          | 97516925  | 97516925  | + | C      | C      |
| 9          | 90258310  | 90258310  | + | C      | C      |
| 6          | 129419329 | 129419329 | + | C      | C      |
| 3          | 36778810  | 36778810  | + | C      | C      |
| 15         | 83932131  | 83932131  | + | G      | G      |
| 18         | 736930    | 736930    | + | A      | A      |
| 7          | 140219486 | 140219486 | + | C      | C      |
| 14         | 22447294  | 22447294  | + | C      | C      |
| 3          | 38157954  | 38157954  | + | G      | G      |
| GL000205.1 | 118458    | 118458    | + | C      | C      |
| 6          | 27861510  | 27861515  | + | CACCTC | CACCTC |
| 6          | 134495704 | 134495705 | + | -      | -      |
| 11         | 1267167   | 1267168   | + | -      | -      |
| 11         | 108381505 | 108381505 | + | T      | T      |
| 10         | 75184111  | 75184111  | + | G      | G      |
| 6          | 29342311  | 29342311  | + | C      | C      |
| 11         | 17629890  | 17629890  | + | G      | G      |
| 7          | 140487360 | 140487360 | + | G      | G      |
| 2          | 669803    | 669803    | + | G      | G      |
| 7          | 96639322  | 96639322  | + | C      | C      |
| 17         | 79080641  | 79080641  | + | C      | C      |
| 6          | 167570591 | 167570591 | + | G      | G      |
| 19         | 49956519  | 49956519  | + | C      | C      |
| 21         | 46703330  | 46703330  | + | G      | G      |
| 18         | 54814771  | 54814771  | + | G      | G      |
| 6          | 55105557  | 55105557  | + | T      | T      |
| 9          | 125642954 | 125642954 | + | G      | G      |
| 7          | 117358147 | 117358147 | + | C      | C      |

|    |           |           |   |   |   |
|----|-----------|-----------|---|---|---|
| 5  | 83360528  | 83360528  | + | C | C |
| 20 | 33934290  | 33934290  | + | C | C |
| 3  | 170078398 | 170078398 | + | C | C |
| 18 | 3596951   | 3596951   | + | C | C |
| 1  | 121310695 | 121310695 | + | G | G |
| 22 | 24827106  | 24827106  | + | C | C |
| X  | 131351267 | 131351267 | + | C | C |
| 11 | 55861330  | 55861330  | + | C | C |
| 16 | 31470488  | 31470488  | + | G | G |
| 13 | 103396906 | 103396906 | + | A | A |
| 12 | 25147207  | 25147207  | + | C | C |
| 12 | 72680671  | 72680671  | + | T | T |
| 12 | 42711186  | 42711186  | + | G | G |
| 19 | 56733551  | 56733551  | + | C | C |
| 5  | 170736677 | 170736677 | + | C | C |
| 21 | 10998251  | 10998251  | + | C | C |
| 16 | 90229187  | 90229187  | + | G | G |
| 19 | 49713970  | 49713970  | + | T | T |
| 19 | 54137877  | 54137877  | + | C | C |
| 7  | 149558262 | 149558262 | + | C | C |
| 13 | 99092928  | 99092928  | + | C | C |
| 1  | 114682326 | 114682326 | + | G | G |
| 17 | 48598492  | 48598492  | + | C | C |
| 6  | 26093049  | 26093049  | + | C | C |
| 2  | 179571228 | 179571228 | + | C | C |
| 16 | 5077287   | 5077287   | + | A | A |
| 15 | 81440983  | 81440983  | + | G | G |
| 21 | 47969830  | 47969830  | + | G | G |
| 19 | 52272517  | 52272517  | + | G | G |
| 11 | 46367053  | 46367053  | + | G | G |
| 1  | 227152957 | 227152957 | + | T | T |
| 1  | 13475078  | 13475078  | + | G | G |
| 8  | 10395998  | 10395998  | + | G | G |
| 1  | 10706256  | 10706256  | + | G | G |
| 4  | 170611755 | 170611755 | + | C | C |
| 5  | 159344524 | 159344524 | + | C | C |
| 20 | 34022266  | 34022266  | + | C | C |
| 3  | 78987789  | 78987789  | + | C | C |
| 19 | 407712    | 407712    | + | T | T |
| 11 | 64037538  | 64037538  | + | G | G |
| 2  | 168104393 | 168104393 | + | C | C |
| 17 | 56270876  | 56270876  | + | A | A |
| 8  | 9912150   | 9912150   | + | G | G |

|    |           |           |   |   |   |
|----|-----------|-----------|---|---|---|
| 17 | 77757544  | 77757544  | + | C | C |
| 2  | 98834354  | 98834354  | + | C | C |
| 7  | 103163894 | 103163894 | + | C | C |
| 16 | 81253719  | 81253719  | + | C | C |
| 22 | 21384015  | 21384015  | + | C | C |
| 12 | 46633627  | 46633627  | + | C | C |
| 1  | 27688043  | 27688043  | + | C | C |
| 15 | 23689130  | 23689130  | + | C | C |
| 10 | 62671124  | 62671124  | + | G | G |
| 17 | 47219504  | 47219504  | + | G | G |
| 11 | 122889438 | 122889438 | + | C | C |
| 11 | 20044601  | 20044601  | + | G | G |
| 14 | 20443737  | 20443737  | + | C | C |
| 1  | 156308132 | 156308132 | + | C | C |
| 7  | 158449357 | 158449357 | + | C | C |
| 16 | 28510272  | 28510272  | + | G | G |
| 5  | 26906830  | 26906830  | + | G | G |
| 13 | 72131172  | 72131172  | + | C | C |
| 1  | 158815726 | 158815726 | + | C | C |
| 2  | 219892147 | 219892147 | + | G | G |
| 19 | 15121607  | 15121607  | + | C | C |
| 16 | 47007586  | 47007586  | + | G | G |
| 13 | 61018866  | 61018866  | + | G | G |
| X  | 63555986  | 63555986  | + | A | A |
| 2  | 27800304  | 27800304  | + | G | G |
| 7  | 103175781 | 103175781 | + | G | G |
| X  | 150869112 | 150869112 | + | G | G |
| 3  | 141328281 | 141328281 | + | C | C |
| 12 | 112186961 | 112186961 | + | C | C |
| 8  | 144295191 | 144295191 | + | C | C |
| 11 | 76371581  | 76371581  | + | C | C |
| 1  | 225564959 | 225564959 | + | A | A |
| 1  | 159779416 | 159779416 | + | G | G |
| 19 | 57037335  | 57037335  | + | C | C |
| X  | 148584876 | 148584876 | + | A | A |
| 16 | 4382297   | 4382297   | + | G | G |
| 7  | 132192657 | 132192657 | + | G | G |
| 22 | 21363704  | 21363704  | + | G | G |
| 2  | 163279798 | 163279798 | + | C | C |
| 17 | 74388092  | 74388092  | + | G | G |
| 2  | 102965587 | 102965587 | + | C | C |
| 19 | 17362514  | 17362514  | + | C | C |
| 16 | 3406106   | 3406106   | + | C | C |

|    |           |           |   |   |   |
|----|-----------|-----------|---|---|---|
| 7  | 150648844 | 150648844 | + | C | C |
| 18 | 61600317  | 61600317  | + | G | G |
| 15 | 60297723  | 60297723  | + | C | C |
| 1  | 247588838 | 247588838 | + | G | G |
| 17 | 6381966   | 6381966   | + | G | G |
| 19 | 9072321   | 9072321   | + | G | G |
| 12 | 132466938 | 132466938 | + | C | C |
| 19 | 4907967   | 4907967   | + | G | G |
| 5  | 140743960 | 140743960 | + | G | G |
| 19 | 52942007  | 52942007  | + | C | C |
| X  | 117706367 | 117706367 | + | G | G |
| 9  | 124461654 | 124461654 | + | G | G |
| 20 | 58558009  | 58558009  | + | G | G |
| 8  | 26365795  | 26365795  | + | G | G |
| 16 | 89220671  | 89220671  | + | C | C |
| 1  | 196706028 | 196706028 | + | C | C |
| 16 | 2158513   | 2158513   | + | G | G |
| 11 | 92531301  | 92531301  | + | G | G |
| 19 | 11411852  | 11411852  | + | G | G |
| 1  | 166891830 | 166891830 | + | C | C |
| 2  | 179453335 | 179453335 | + | C | C |
| 20 | 33934278  | 33934278  | + | A | A |
| 20 | 54823851  | 54823851  | + | C | C |
| 10 | 85984132  | 85984132  | + | G | G |
| 11 | 4936237   | 4936237   | + | G | G |
| 12 | 71551602  | 71551602  | + | G | G |
| 1  | 247486516 | 247486516 | + | G | G |
| 22 | 37709670  | 37709670  | + | C | C |
| 17 | 41456607  | 41456607  | + | G | G |
| 8  | 146279721 | 146279721 | + | C | C |
| 2  | 241969954 | 241969954 | + | G | G |
| 14 | 101348124 | 101348124 | + | C | C |
| 20 | 51872447  | 51872447  | + | C | C |
| 16 | 16228241  | 16228241  | + | C | C |
| 20 | 9498786   | 9498786   | + | C | C |
| 10 | 73501734  | 73501734  | + | C | C |
| 19 | 9069742   | 9069742   | + | C | C |
| 8  | 144458786 | 144458786 | + | G | G |
| 19 | 3600381   | 3600381   | + | G | G |
| 8  | 27468070  | 27468070  | + | G | G |
| 2  | 163374667 | 163374667 | + | C | C |
| 19 | 49999638  | 49999638  | + | C | C |
| X  | 106184748 | 106184748 | + | G | G |

|    |           |           |   |   |   |
|----|-----------|-----------|---|---|---|
| X  | 54278099  | 54278099  | + | C | C |
| 1  | 151554722 | 151554722 | + | T | T |
| 12 | 21331636  | 21331636  | + | G | G |
| 2  | 63849598  | 63849598  | + | C | C |
| 2  | 130831606 | 130831606 | + | C | C |
| 4  | 110788926 | 110788926 | + | G | G |
| 2  | 179403667 | 179403667 | + | C | C |
| X  | 69503458  | 69503458  | + | G | G |
| 15 | 25438503  | 25438503  | + | G | G |
| 13 | 21218998  | 21218998  | + | C | C |
| 11 | 31113035  | 31113035  | + | C | C |
| 4  | 183657967 | 183657967 | + | C | C |
| 15 | 41820453  | 41820453  | + | A | A |
| 8  | 3059156   | 3059156   | + | G | G |
| X  | 48547423  | 48547423  | + | G | G |
| 12 | 120650204 | 120650204 | + | G | G |
| 8  | 51705279  | 51705279  | + | T | T |
| 12 | 43821267  | 43821267  | + | G | G |
| 2  | 215928850 | 215928850 | + | G | G |
| 7  | 102898150 | 102898150 | + | G | G |
| 1  | 158225796 | 158225796 | + | C | C |
| 9  | 90401740  | 90401740  | + | G | G |
| 11 | 6636421   | 6636421   | + | G | G |
| 14 | 102024138 | 102024138 | + | G | G |
| 20 | 35406171  | 35406171  | + | G | G |
| 7  | 34091556  | 34091556  | + | G | G |
| 19 | 6586221   | 6586221   | + | C | C |
| 15 | 43093901  | 43093901  | + | G | G |
| 16 | 55862755  | 55862755  | + | C | C |
| 3  | 130107449 | 130107449 | + | A | A |
| 19 | 52147156  | 52147156  | + | G | G |
| 10 | 95720244  | 95720244  | + | T | T |
| 19 | 43967538  | 43967538  | + | G | G |
| 1  | 225568020 | 225568020 | + | C | C |
| 2  | 136566601 | 136566601 | + | G | G |
| 16 | 31770732  | 31770732  | + | A | A |
| 5  | 150562940 | 150562940 | + | G | G |
| 16 | 88552442  | 88552442  | + | C | C |
| 6  | 30078395  | 30078395  | + | G | G |
| 19 | 54106731  | 54106731  | + | G | G |
| 16 | 68013661  | 68013661  | + | C | C |
| 3  | 75679929  | 75679929  | + | G | G |
| 19 | 35801063  | 35801063  | + | C | C |

|    |           |           |   |   |   |
|----|-----------|-----------|---|---|---|
| 22 | 44583511  | 44583511  | + | G | G |
| 19 | 18871017  | 18871017  | + | G | G |
| 12 | 10010081  | 10010081  | + | C | C |
| 12 | 49691274  | 49691274  | + | G | G |
| 11 | 77635920  | 77635920  | + | G | G |
| 5  | 115323527 | 115323527 | + | G | G |
| 8  | 10464903  | 10464903  | + | C | C |
| 12 | 8692528   | 8692528   | + | G | G |
| 9  | 132397404 | 132397404 | + | C | C |
| X  | 111698536 | 111698536 | + | G | G |
| 17 | 38175887  | 38175887  | + | C | C |
| 20 | 44674555  | 44674555  | + | G | G |
| 1  | 248813346 | 248813346 | + | G | G |
| 9  | 68414329  | 68414329  | + | C | C |
| 8  | 2967721   | 2967721   | + | G | G |
| 6  | 55300324  | 55300324  | + | C | C |
| X  | 36329083  | 36329083  | + | C | C |
| 14 | 92087996  | 92087996  | + | C | C |
| 5  | 141244964 | 141244964 | + | G | G |
| 6  | 28253415  | 28253415  | + | C | C |
| 7  | 122821123 | 122821123 | + | G | G |
| 4  | 71508720  | 71508720  | + | G | G |
| 2  | 3726132   | 3726132   | + | G | G |
| 5  | 72359719  | 72359719  | + | C | C |
| 1  | 229678002 | 229678002 | + | G | G |
| 16 | 58549393  | 58549393  | + | G | G |
| 11 | 46393691  | 46393691  | + | T | T |
| 22 | 45593083  | 45593083  | + | G | G |
| 3  | 39229929  | 39229929  | + | G | G |
| 2  | 207603125 | 207603125 | + | C | C |
| 19 | 55817735  | 55817735  | + | C | C |
| 8  | 1626468   | 1626468   | + | G | G |
| 9  | 8518390   | 8518390   | + | C | C |
| 12 | 110468507 | 110468507 | + | G | G |
| 5  | 133747279 | 133747279 | + | G | G |
| 19 | 40581109  | 40581109  | + | T | T |
| 2  | 72725669  | 72725669  | + | G | G |
| 3  | 78987790  | 78987790  | + | C | C |
| 10 | 124034556 | 124034556 | + | T | T |
| 5  | 79617365  | 79617365  | + | A | A |
| 12 | 4736224   | 4736224   | + | G | G |
| X  | 134030946 | 134030946 | + | G | G |
| 16 | 83781834  | 83781834  | + | C | C |

|    |           |           |   |   |   |
|----|-----------|-----------|---|---|---|
| 10 | 37505199  | 37505199  | + | G | G |
| 7  | 98460722  | 98460722  | + | G | G |
| 5  | 140517137 | 140517137 | + | C | C |
| 19 | 10625216  | 10625216  | + | C | C |
| X  | 128631891 | 128631891 | + | C | C |
| 17 | 64880971  | 64880971  | + | C | C |
| 2  | 102480332 | 102480332 | + | C | C |
| 8  | 108315580 | 108315580 | + | C | C |
| 17 | 38126825  | 38126825  | + | G | G |
| 19 | 40581115  | 40581115  | + | C | C |
| 12 | 49218718  | 49218718  | + | C | C |
| X  | 152610317 | 152610317 | + | C | C |
| 11 | 130319334 | 130319334 | + | C | C |
| 8  | 3326319   | 3326319   | + | G | G |
| 8  | 22078864  | 22078864  | + | C | C |
| 16 | 68014061  | 68014061  | + | G | G |
| 15 | 58889461  | 58889461  | + | G | G |
| 13 | 88328385  | 88328385  | + | G | G |
| 2  | 128476952 | 128476952 | + | G | G |
| 11 | 48373772  | 48373772  | + | C | C |
| 12 | 50746166  | 50746166  | + | G | G |
| 1  | 201035026 | 201035026 | + | G | G |
| 1  | 67306209  | 67306209  | + | G | G |
| 12 | 8673900   | 8673900   | + | G | G |
| 9  | 66457999  | 66457999  | + | C | C |
| 14 | 101349128 | 101349128 | + | C | C |
| 1  | 208252764 | 208252764 | + | C | C |
| 4  | 25314400  | 25314400  | + | C | C |
| 7  | 81662148  | 81662148  | + | G | G |
| 17 | 38175886  | 38175886  | + | C | C |
| 8  | 62416044  | 62416044  | + | G | G |
| 2  | 56611505  | 56611505  | + | C | C |
| 2  | 234160279 | 234160279 | + | C | C |
| 14 | 32563083  | 32563083  | + | C | C |
| 20 | 9417688   | 9417688   | + | G | G |
| 22 | 44583510  | 44583510  | + | G | G |
| 16 | 29859329  | 29859329  | + | G | G |
| 11 | 563353    | 563353    | + | G | G |
| 12 | 53849251  | 53849251  | + | G | G |
| 12 | 13716862  | 13716862  | + | C | C |
| 5  | 177548320 | 177548320 | + | C | C |
| 19 | 18266702  | 18266702  | + | G | G |
| 14 | 73989776  | 73989776  | + | C | C |

|            |           |           |   |   |   |
|------------|-----------|-----------|---|---|---|
| 20         | 3214852   | 3214852   | + | T | T |
| 2          | 10930003  | 10930003  | + | G | G |
| 7          | 25266454  | 25266454  | + | C | C |
| 5          | 80404871  | 80404871  | + | C | C |
| 5          | 49701600  | 49701600  | + | G | G |
| 8          | 12216912  | 12216912  | + | G | G |
| 5          | 13944571  | 13944571  | + | G | G |
| 12         | 56630202  | 56630202  | + | G | G |
| 19         | 45856036  | 45856036  | + | G | G |
| 10         | 95110996  | 95110996  | + | G | G |
| 5          | 121187767 | 121187767 | + | C | C |
| GL000241.1 | 25566     | 25566     | + | G | G |
| 12         | 112605243 | 112605243 | + | G | G |
| 11         | 56954891  | 56954891  | + | C | C |
| 5          | 69405764  | 69405764  | + | G | G |
| 5          | 140474818 | 140474818 | + | C | C |
| 5          | 14582023  | 14582023  | + | C | C |
| 1          | 27995827  | 27995827  | + | G | G |
| 5          | 180053207 | 180053207 | + | C | C |
| 18         | 59206323  | 59206323  | + | C | C |
| 19         | 43371381  | 43371381  | + | C | C |
| 2          | 130877719 | 130877719 | + | C | C |
| 7          | 136700678 | 136700678 | + | G | G |
| 4          | 80329114  | 80329114  | + | C | C |
| 7          | 138602586 | 138602586 | + | G | G |
| 7          | 44268682  | 44268682  | + | C | C |
| 18         | 66504034  | 66504034  | + | G | G |
| 1          | 169510675 | 169510675 | + | A | A |
| X          | 138286438 | 138286438 | + | G | G |
| X          | 69479462  | 69479462  | + | C | C |
| 20         | 5282842   | 5282842   | + | G | G |
| 11         | 48367379  | 48367379  | + | C | C |
| 12         | 125834101 | 125834101 | + | C | C |
| GL000195.1 | 44479     | 44479     | + | T | T |
| 6          | 49986824  | 49986824  | + | G | G |
| 20         | 1902298   | 1902298   | + | C | C |
| X          | 147030967 | 147030967 | + | G | G |
| 1          | 57340705  | 57340705  | + | C | C |
| X          | 123044645 | 123044645 | + | G | G |
| 19         | 57293349  | 57293349  | + | C | C |
| 16         | 72163009  | 72163009  | + | C | C |
| 3          | 36884160  | 36884160  | + | C | C |
| 19         | 22271655  | 22271655  | + | A | A |



|    |           |           |   |   |   |
|----|-----------|-----------|---|---|---|
| 20 | 33874649  | 33874649  | + | G | G |
| 10 | 96802736  | 96802736  | + | C | C |
| 2  | 179499298 | 179499298 | + | C | C |
| 3  | 44803214  | 44803214  | + | C | C |
| 14 | 96875210  | 96875210  | + | G | G |
| 10 | 90433452  | 90433452  | + | A | A |
| 11 | 66460542  | 66460542  | + | C | C |
| 5  | 98228409  | 98228409  | + | G | G |
| 16 | 90229185  | 90229185  | + | C | C |
| 19 | 44039815  | 44039815  | + | G | G |
| 17 | 3818804   | 3818804   | + | G | G |
| 14 | 100375788 | 100375788 | + | C | C |
| 2  | 3391850   | 3391850   | + | C | C |
| 15 | 25223565  | 25223565  | + | C | C |
| 18 | 61255958  | 61255958  | + | G | G |
| 2  | 165969460 | 165969460 | + | C | C |
| 9  | 66459863  | 66459863  | + | G | G |
| 10 | 42928752  | 42928752  | + | G | G |
| 1  | 76387988  | 76387988  | + | T | T |
| X  | 134185895 | 134185895 | + | G | G |
| 6  | 30865888  | 30865888  | + | C | C |
| 16 | 57717926  | 57717926  | + | G | G |
| 15 | 85383622  | 85383622  | + | G | G |
| 19 | 22362677  | 22362677  | + | T | T |
| 6  | 152489186 | 152489186 | + | C | C |
| 19 | 42354496  | 42354496  | + | G | G |
| 22 | 42608228  | 42608228  | + | T | T |
| 2  | 228788782 | 228788782 | + | C | C |
| 7  | 51152923  | 51152923  | + | G | G |
| 16 | 56548507  | 56548507  | + | A | A |
| 13 | 29600846  | 29600846  | + | C | C |
| 6  | 38939430  | 38939430  | + | T | T |
| 11 | 100168386 | 100168386 | + | G | G |
| 19 | 53367217  | 53367217  | + | A | A |
| 19 | 46375371  | 46375371  | + | C | C |
| 18 | 46386113  | 46386113  | + | C | C |
| 2  | 164466783 | 164466783 | + | C | C |
| 17 | 76073561  | 76073561  | + | T | T |
| 18 | 44159718  | 44159718  | + | C | C |
| 20 | 49218679  | 49218679  | + | G | G |
| 11 | 62748489  | 62748489  | + | G | G |
| X  | 73065215  | 73065215  | + | G | G |
| 19 | 42509908  | 42509908  | + | C | C |

|            |           |           |   |   |   |
|------------|-----------|-----------|---|---|---|
| 1          | 175334344 | 175334344 | + | G | G |
| 15         | 50215583  | 50215583  | + | T | T |
| 2          | 98858725  | 98858725  | + | C | C |
| 19         | 56419314  | 56419314  | + | G | G |
| 2          | 47044514  | 47044514  | + | G | G |
| 17         | 48614269  | 48614269  | + | G | G |
| 11         | 73744950  | 73744950  | + | G | G |
| 12         | 53865444  | 53865444  | + | G | G |
| 9          | 66468857  | 66468857  | + | C | C |
| 6          | 84270663  | 84270663  | + | C | C |
| GL000219.1 | 58763     | 58763     | + | G | G |
| 7          | 35289637  | 35289637  | + | G | G |
| GL000219.1 | 56890     | 56890     | + | C | C |
| 1          | 228467081 | 228467081 | + | C | C |
| 18         | 19994542  | 19994542  | + | C | C |
| X          | 73062381  | 73062381  | + | C | C |
| 5          | 35965989  | 35965989  | + | C | C |
| 12         | 7080016   | 7080016   | + | G | G |
| 19         | 9090080   | 9090080   | + | C | C |
| 9          | 100245218 | 100245218 | + | C | C |
| 5          | 175722091 | 175722091 | + | C | C |
| 7          | 100551602 | 100551602 | + | C | C |
| 10         | 8116040   | 8116040   | + | G | G |
| 13         | 114438367 | 114438367 | + | G | G |
| 18         | 580545    | 580545    | + | G | G |
| 11         | 3660985   | 3660985   | + | G | G |
| 6          | 7727473   | 7727473   | + | C | C |
| X          | 110406220 | 110406220 | + | A | A |
| 9          | 127167634 | 127167634 | + | G | G |
| 1          | 161188783 | 161188783 | + | C | C |
| 11         | 8486341   | 8486341   | + | C | C |
| 6          | 35287674  | 35287674  | + | G | G |
| 11         | 64037539  | 64037539  | + | G | G |
| 17         | 59557471  | 59557471  | + | C | C |
| 19         | 23159631  | 23159631  | + | T | T |
| 2          | 166900465 | 166900465 | + | G | G |
| 15         | 51696760  | 51696760  | + | G | G |
| X          | 147030772 | 147030772 | + | C | C |
| 1          | 200378478 | 200378478 | + | C | C |
| 19         | 55785773  | 55785773  | + | G | G |
| 6          | 29759007  | 29759007  | + | G | G |
| 5          | 1293562   | 1293562   | + | G | G |
| X          | 47085815  | 47085815  | + | C | C |

|    |           |           |   |   |   |
|----|-----------|-----------|---|---|---|
| 1  | 243354617 | 243354617 | + | G | G |
| 1  | 159770300 | 159770300 | + | C | C |
| 14 | 95057030  | 95057030  | + | G | G |
| 1  | 213162026 | 213162026 | + | G | G |
| 14 | 101458292 | 101458292 | + | C | C |
| 3  | 51864508  | 51864508  | + | C | C |
| 7  | 142326480 | 142326480 | + | A | A |
| 19 | 49183521  | 49183521  | + | C | C |
| 16 | 29998269  | 29998269  | + | C | C |
| 2  | 96993849  | 96993849  | + | C | C |
| 16 | 31471147  | 31471147  | + | C | C |
| 15 | 54919392  | 54919392  | + | C | C |
| 15 | 42986830  | 42986830  | + | C | C |
| 13 | 52439712  | 52439712  | + | G | G |
| 1  | 206772870 | 206772870 | + | G | G |
| 2  | 179499305 | 179499305 | + | C | C |
| 20 | 8755189   | 8755189   | + | G | G |
| 16 | 67429410  | 67429410  | + | G | G |
| 12 | 7805217   | 7805217   | + | A | A |
| 5  | 22078579  | 22078579  | + | G | G |
| 15 | 74364651  | 74364651  | + | C | C |
| 3  | 124385373 | 124385373 | + | C | C |
| 2  | 207558012 | 207558012 | + | C | C |
| 11 | 63176295  | 63176295  | + | C | C |
| 18 | 18540117  | 18540117  | + | G | G |
| 1  | 231355518 | 231355518 | + | C | C |
| 1  | 115632021 | 115632021 | + | G | G |
| 17 | 8656721   | 8656721   | + | C | C |
| 20 | 29623165  | 29623165  | + | C | C |
| 16 | 1034768   | 1034768   | + | G | G |
| 20 | 44987252  | 44987252  | + | G | G |
| 2  | 39944384  | 39944384  | + | C | C |
| 8  | 55647278  | 55647278  | + | C | C |
| 1  | 159770301 | 159770301 | + | C | C |
| 17 | 73809276  | 73809276  | + | C | C |
| 12 | 25297508  | 25297508  | + | G | G |
| 19 | 9090369   | 9090369   | + | C | C |
| 15 | 72499097  | 72499097  | + | G | G |
| 6  | 25916075  | 25916075  | + | G | G |
| 11 | 60780959  | 60780959  | + | C | C |
| 2  | 228235633 | 228235633 | + | C | C |
| 3  | 196529902 | 196529902 | + | G | G |
| 12 | 11150220  | 11150220  | + | A | A |

|    |           |           |   |   |   |
|----|-----------|-----------|---|---|---|
| 2  | 24974859  | 24974859  | + | C | C |
| 10 | 127455477 | 127455477 | + | C | C |
| 14 | 22539448  | 22539448  | + | G | G |
| 15 | 93588143  | 93588143  | + | G | G |
| 11 | 66192251  | 66192251  | + | T | T |
| 20 | 7866417   | 7866417   | + | G | G |
| 12 | 43770104  | 43770104  | + | G | G |
| 12 | 50747299  | 50747299  | + | C | C |
| 2  | 220349085 | 220349085 | + | C | C |
| 3  | 44803213  | 44803213  | + | C | C |
| 8  | 95262515  | 95262515  | + | G | G |
| 19 | 51140653  | 51140653  | + | C | C |
| 1  | 67126198  | 67126198  | + | G | G |
| 5  | 149574423 | 149574423 | + | G | G |
| 5  | 28927201  | 28927201  | + | G | G |
| 4  | 49063837  | 49063837  | + | C | C |
| 5  | 36035586  | 36035586  | + | G | G |
| 1  | 111889572 | 111889572 | + | G | G |
| 16 | 20556547  | 20556547  | + | C | C |
| 1  | 248059688 | 248059688 | + | C | C |
| 11 | 123900949 | 123900949 | + | C | C |
| 19 | 30097212  | 30097212  | + | G | G |
| 4  | 69535923  | 69535923  | + | C | C |
| 5  | 140481219 | 140481219 | + | G | G |
| 1  | 32262264  | 32262264  | + | G | G |
| 13 | 114438368 | 114438368 | + | G | G |
| 11 | 93141545  | 93141545  | + | G | G |
| 19 | 35532678  | 35532678  | + | G | G |
| 16 | 88804211  | 88804211  | + | C | C |
| 11 | 64037604  | 64037604  | + | G | G |
| 22 | 29704277  | 29704277  | + | C | C |
| 12 | 7310284   | 7310284   | + | G | G |
| 6  | 345884    | 345884    | + | C | C |
| 17 | 26603942  | 26603942  | + | T | T |
| 13 | 114005184 | 114005184 | + | G | G |
| 8  | 139838999 | 139838999 | + | C | C |
| 1  | 202702879 | 202702879 | + | C | C |
| 4  | 74321462  | 74321462  | + | C | C |
| 7  | 42949123  | 42949123  | + | G | G |
| 7  | 72440390  | 72440390  | + | G | G |
| 18 | 33607039  | 33607039  | + | C | C |
| 19 | 9049592   | 9049592   | + | C | C |
| 2  | 25754382  | 25754382  | + | G | G |

|    |           |           |   |   |   |
|----|-----------|-----------|---|---|---|
| 2  | 179647757 | 179647757 | + | G | G |
| 11 | 124294102 | 124294102 | + | G | G |
| 11 | 6502565   | 6502565   | + | G | G |
| 6  | 6152112   | 6152112   | + | G | G |
| 19 | 55147870  | 55147870  | + | G | G |
| 14 | 77269717  | 77269717  | + | G | G |
| X  | 134994321 | 134994321 | + | C | C |
| 16 | 32163575  | 32163575  | + | G | G |
| 19 | 15536322  | 15536322  | + | G | G |
| 16 | 28909363  | 28909363  | + | T | T |
| 7  | 35289636  | 35289636  | + | T | T |
| 20 | 1552399   | 1552399   | + | G | G |
| 12 | 7635291   | 7635291   | + | G | G |
| 19 | 56321459  | 56321459  | + | C | C |
| 20 | 56082827  | 56082827  | + | C | C |
| X  | 101096040 | 101096040 | + | C | C |
| 8  | 101936141 | 101936141 | + | C | C |
| 11 | 92086629  | 92086629  | + | G | G |
| 5  | 143853366 | 143853366 | + | G | G |
| 6  | 84234040  | 84234040  | + | G | G |
| 12 | 52100289  | 52100289  | + | G | G |
| 1  | 20659318  | 20659318  | + | G | G |
| 5  | 115323526 | 115323526 | + | G | G |
| 12 | 96704940  | 96704940  | + | A | A |
| 1  | 12785956  | 12785956  | + | G | G |
| 11 | 87033140  | 87033140  | + | G | G |
| 4  | 126241867 | 126241867 | + | C | C |
| X  | 119388907 | 119388907 | + | G | G |
| 6  | 36949425  | 36949425  | + | G | G |
| 8  | 145773172 | 145773172 | + | G | G |
| 1  | 57206380  | 57206380  | + | C | C |
| 2  | 185802134 | 185802134 | + | G | G |
| 5  | 41181595  | 41181595  | + | C | C |
| 4  | 123336671 | 123336671 | + | C | C |
| 5  | 94275883  | 94275883  | + | G | G |
| 16 | 84456083  | 84456083  | + | G | G |
| 19 | 35232756  | 35232756  | + | A | A |
| 2  | 215802267 | 215802267 | + | G | G |
| 19 | 54403938  | 54403938  | + | G | G |
| X  | 75648691  | 75648691  | + | G | G |
| 8  | 22873215  | 22873215  | + | T | T |
| 20 | 61443819  | 61443819  | + | C | C |
| 3  | 121132134 | 121132134 | + | G | G |

|    |           |           |   |   |   |
|----|-----------|-----------|---|---|---|
| 20 | 33999785  | 33999785  | + | C | C |
| 5  | 167630771 | 167630771 | + | G | G |
| 17 | 60472475  | 60472475  | + | C | C |
| 8  | 113599431 | 113599431 | + | C | C |
| X  | 153171251 | 153171251 | + | G | G |
| 2  | 21232483  | 21232483  | + | G | G |
| 11 | 57080809  | 57080809  | + | G | G |
| 17 | 4463096   | 4463096   | + | G | G |
| 9  | 130494135 | 130494135 | + | C | C |
| 3  | 150644333 | 150644333 | + | C | C |
| 20 | 57829536  | 57829536  | + | C | C |
| 1  | 42621376  | 42621376  | + | G | G |
| 3  | 127642963 | 127642963 | + | T | T |
| 6  | 43578348  | 43578348  | + | C | C |
| 8  | 30701905  | 30701905  | + | C | C |
| 2  | 220503511 | 220503511 | + | C | C |
| 7  | 99145684  | 99145684  | + | G | G |
| X  | 3238772   | 3238772   | + | G | G |
| 5  | 137710848 | 137710848 | + | C | C |
| 11 | 5410716   | 5410716   | + | C | C |
| 2  | 86845182  | 86845182  | + | G | G |
| 17 | 39646010  | 39646010  | + | G | G |
| 13 | 113770060 | 113770060 | + | C | C |
| 16 | 28990892  | 28990892  | + | G | G |
| 1  | 40781321  | 40781321  | + | C | C |
| 15 | 85438889  | 85438889  | + | G | G |
| X  | 150770041 | 150770041 | + | G | G |
| 6  | 31760595  | 31760595  | + | G | G |
| 1  | 45477842  | 45477842  | + | T | T |
| 6  | 56505401  | 56505401  | + | A | A |
| 14 | 23844888  | 23844888  | + | G | G |
| 12 | 62104169  | 62104169  | + | C | C |
| 1  | 160168479 | 160168479 | + | G | G |
| 9  | 139804435 | 139804435 | + | C | C |
| 2  | 33740207  | 33740207  | + | G | G |
| 18 | 50450228  | 50450228  | + | G | G |
| 1  | 223284203 | 223284203 | + | C | C |
| 11 | 56058290  | 56058290  | + | C | C |
| 14 | 77845158  | 77845158  | + | G | G |
| 16 | 29675990  | 29675990  | + | C | C |
| 16 | 68014062  | 68014062  | + | G | G |
| 22 | 22661721  | 22661721  | + | G | G |
| 4  | 110662021 | 110662021 | + | G | G |

|    |           |           |   |   |   |
|----|-----------|-----------|---|---|---|
| 20 | 30661596  | 30661596  | + | G | G |
| 5  | 13922321  | 13922321  | + | C | C |
| 15 | 89422867  | 89422867  | + | C | C |
| 17 | 48355985  | 48355985  | + | C | C |
| 1  | 111957787 | 111957787 | + | G | G |
| 19 | 2794800   | 2794800   | + | C | C |
| 1  | 111437669 | 111437669 | + | C | C |
| 1  | 247695155 | 247695155 | + | C | C |
| 8  | 73849083  | 73849083  | + | C | C |
| X  | 63490884  | 63490884  | + | G | G |
| 17 | 50212255  | 50212255  | + | C | C |
| 1  | 47650692  | 47650692  | + | G | G |
| 7  | 142428938 | 142428938 | + | G | G |
| 15 | 25475900  | 25475900  | + | C | C |
| 6  | 37426446  | 37426446  | + | G | G |
| 3  | 46718407  | 46718407  | + | G | G |
| 11 | 46898170  | 46898170  | + | C | C |
| 19 | 58265565  | 58265565  | + | C | C |
| 2  | 107021604 | 107021604 | + | C | C |
| 20 | 40733314  | 40733314  | + | G | G |
| 15 | 28502238  | 28502238  | + | G | G |
| 14 | 20443736  | 20443736  | + | C | C |
| 15 | 38545218  | 38545218  | + | C | C |
| X  | 5811319   | 5811319   | + | G | G |
| 6  | 39025296  | 39025296  | + | G | G |
| 20 | 34022265  | 34022265  | + | C | C |
| 19 | 35758529  | 35758529  | + | G | G |
| 4  | 77003592  | 77003592  | + | G | G |
| 18 | 77211095  | 77211095  | + | C | C |
| 9  | 138586903 | 138586903 | + | C | C |
| 19 | 53513745  | 53513745  | + | C | C |
| 17 | 30611812  | 30611812  | + | C | C |
| 10 | 131638518 | 131638518 | + | C | C |
| 12 | 117664496 | 117664496 | + | G | G |
| 4  | 96470080  | 96470080  | + | G | G |
| 1  | 1118287   | 1118287   | + | C | C |
| 12 | 49431533  | 49431533  | + | A | A |
| 7  | 100333387 | 100333387 | + | G | G |
| 2  | 179479412 | 179479412 | + | C | C |
| 17 | 37886778  | 37886778  | + | C | C |
| 9  | 125273584 | 125273584 | + | C | C |
| 16 | 23769008  | 23769008  | + | C | C |
| 1  | 109957914 | 109957914 | + | G | G |

|    |           |           |   |   |   |
|----|-----------|-----------|---|---|---|
| 17 | 73809275  | 73809275  | + | C | C |
| 1  | 177250087 | 177250087 | + | C | C |
| 1  | 158747402 | 158747402 | + | G | G |
| 3  | 148890142 | 148890142 | + | C | C |
| 19 | 16146710  | 16146710  | + | C | C |
| 19 | 11136173  | 11136173  | + | C | C |
| X  | 150832620 | 150832620 | + | C | C |
| 1  | 117619442 | 117619442 | + | C | C |
| 7  | 86539315  | 86539315  | + | C | C |
| 14 | 68268804  | 68268804  | + | G | G |
| 2  | 48809592  | 48809592  | + | A | A |
| 8  | 124998329 | 124998329 | + | G | G |
| 1  | 223568186 | 223568186 | + | C | C |
| 4  | 367454    | 367454    | + | C | C |
| 15 | 101152538 | 101152538 | + | C | C |
| X  | 51487161  | 51487161  | + | G | G |
| 15 | 34102837  | 34102837  | + | C | C |
| 10 | 34671556  | 34671556  | + | C | C |
| 20 | 31499453  | 31499453  | + | G | G |
| 5  | 32089777  | 32089777  | + | G | G |
| 1  | 35578949  | 35578949  | + | C | C |
| 15 | 93162606  | 93162606  | + | G | G |
| 5  | 39315880  | 39315880  | + | C | C |
| 8  | 110655037 | 110655037 | + | G | G |
| 8  | 22873214  | 22873214  | + | G | G |
| 7  | 102235767 | 102235767 | + | C | C |
| 2  | 113591027 | 113591027 | + | C | C |
| X  | 10085686  | 10085686  | + | G | G |
| 12 | 47160459  | 47160459  | + | G | G |
| 17 | 20407299  | 20407299  | + | C | C |
| 8  | 69621248  | 69621248  | + | G | G |
| 11 | 64037459  | 64037459  | + | G | G |
| 16 | 76569530  | 76569530  | + | C | C |
| 16 | 427423    | 427423    | + | G | G |
| 1  | 104120111 | 104120111 | + | G | G |
| 2  | 228881762 | 228881762 | + | C | C |
| 10 | 99161111  | 99161111  | + | G | G |
| 11 | 36511925  | 36511925  | + | G | G |
| 2  | 179481477 | 179481477 | + | C | C |
| 8  | 41554104  | 41554104  | + | A | A |
| 8  | 39114812  | 39114812  | + | G | G |
| 4  | 164506983 | 164506983 | + | C | C |
| 5  | 176053562 | 176053562 | + | G | G |



|    |           |           |   |   |   |
|----|-----------|-----------|---|---|---|
| 9  | 125562841 | 125562841 | + | G | G |
| 1  | 115829063 | 115829063 | + | C | C |
| X  | 103036146 | 103036146 | + | A | A |
| 7  | 44579780  | 44579780  | + | G | G |
| 16 | 75267818  | 75267818  | + | C | C |
| 16 | 4257703   | 4257703   | + | C | C |
| 1  | 156918138 | 156918138 | + | G | G |
| 19 | 17947907  | 17947907  | + | G | G |
| 22 | 50580554  | 50580554  | + | G | G |
| 3  | 69151092  | 69151092  | + | G | G |
| 12 | 129028590 | 129028590 | + | G | G |
| 11 | 12348760  | 12348760  | + | G | G |
| 19 | 55111998  | 55111998  | + | C | C |
| 3  | 135721811 | 135721811 | + | A | A |
| 9  | 139343178 | 139343178 | + | G | G |
| 8  | 35544167  | 35544167  | + | A | A |
| 1  | 144917832 | 144917832 | + | G | G |
| 9  | 130489294 | 130489294 | + | G | G |
| 21 | 41151175  | 41151175  | + | C | C |
| 4  | 170611754 | 170611754 | + | C | C |
| 22 | 21380552  | 21380552  | + | C | C |
| 1  | 115258745 | 115258745 | + | C | C |
| 7  | 44798968  | 44798968  | + | C | C |
| 4  | 38775675  | 38775675  | + | C | C |
| 8  | 2855624   | 2855624   | + | G | G |
| 1  | 62739897  | 62739897  | + | G | G |
| 4  | 71232436  | 71232436  | + | C | C |
| 7  | 126173126 | 126173126 | + | C | C |
| 16 | 31539914  | 31539914  | + | C | C |
| 18 | 20932160  | 20932160  | + | C | C |
| 2  | 224462294 | 224462294 | + | G | G |
| 13 | 77569310  | 77569310  | + | C | C |
| 4  | 183652188 | 183652188 | + | G | G |
| 19 | 36018177  | 36018177  | + | A | A |
| 16 | 50813587  | 50813587  | + | C | C |
| 2  | 27357162  | 27357162  | + | T | T |
| 6  | 26123732  | 26123732  | + | A | A |
| 18 | 48255650  | 48255650  | + | C | C |
| 10 | 26825085  | 26825085  | + | A | A |
| 17 | 79427970  | 79427970  | + | C | C |
| 8  | 77764458  | 77764458  | + | G | G |
| 9  | 77377992  | 77377992  | + | C | C |
| 1  | 152058462 | 152058462 | + | C | C |

|    |           |           |   |                                     |                 |
|----|-----------|-----------|---|-------------------------------------|-----------------|
| 5  | 169021191 | 169021191 | + | G                                   | G               |
| 8  | 131848684 | 131848684 | + | G                                   | G               |
| 17 | 61657292  | 61657292  | + | C                                   | C               |
| 8  | 30701906  | 30701906  | + | C                                   | C               |
| 8  | 94935084  | 94935084  | + | G                                   | G               |
| 12 | 43826216  | 43826216  | + | T                                   | T               |
| 21 | 35189704  | 35189704  | + | C                                   | C               |
| 13 | 19751322  | 19751322  | + | G                                   | G               |
| 16 | 4033353   | 4033353   | + | G                                   | G               |
| 5  | 54579220  | 54579220  | + | A                                   | A               |
| X  | 129492636 | 129492636 | + | G                                   | G               |
| 22 | 40364083  | 40364083  | + | G                                   | G               |
| 3  | 98109866  | 98109866  | + | C                                   | C               |
| 17 | 62082238  | 62082238  | + | C                                   | C               |
| 15 | 58458944  | 58458944  | + | G                                   | G               |
| X  | 109416542 | 109416542 | + | C                                   | C               |
| 1  | 248308656 | 248308656 | + | G                                   | G               |
| 7  | 23562042  | 23562042  | + | G                                   | G               |
| 12 | 72680670  | 72680670  | + | A                                   | A               |
| 6  | 31239201  | 31239201  | + | A                                   | A               |
| 3  | 113049154 | 113049154 | + | G                                   | G               |
| 16 | 22339937  | 22339937  | + | G                                   | G               |
| 1  | 153727170 | 153727170 | + | T                                   | T               |
| 1  | 242511432 | 242511433 | + | -                                   | -               |
| 2  | 190719518 | 190719518 | + | C                                   | C               |
| 2  | 218712498 | 218712498 | + | A                                   | A               |
| 2  | 220332050 | 220332076 | + | AATGCAAGATGCATTTCAATGCAAGATGCATTTCC |                 |
| 6  | 12294283  | 12294288  | + | AAAGAC                              | AAAGAC          |
| 7  | 37903996  | 37903997  | + | -                                   | -               |
| 7  | 44621063  | 44621063  | + | G                                   | G               |
| 11 | 128354753 | 128354762 | + | GTGACGACTT                          | GTGACGACTT      |
| 14 | 21929431  | 21929431  | + | G                                   | G               |
| 17 | 29652895  | 29652909  | + | AAAGCCATATTATGC                     | AAAGCCATATTATGC |
| 17 | 30986210  | 30986216  | + | GTAGTCT                             | GTAGTCT         |
| 19 | 44131423  | 44131423  | + | C                                   | C               |
| 20 | 37202862  | 37202862  | + | A                                   | A               |
| 22 | 32017842  | 32017843  | + | GC                                  | GC              |
| 3  | 122419342 | 122419342 | + | T                                   | T               |
| 11 | 102394031 | 102394031 | + | C                                   | C               |
| 12 | 52797685  | 52797685  | + | G                                   | G               |
| 3  | 49699841  | 49699841  | + | C                                   | C               |
| 1  | 156641384 | 156641384 | + | C                                   | C               |
| 13 | 113814419 | 113814419 | + | G                                   | G               |

|    |           |           |   |   |   |
|----|-----------|-----------|---|---|---|
| 6  | 49663590  | 49663590  | + | G | G |
| 20 | 51871534  | 51871534  | + | G | G |
| 16 | 81078519  | 81078519  | + | T | T |
| 3  | 58190532  | 58190532  | + | C | C |
| 12 | 9010113   | 9010113   | + | G | G |
| 3  | 126916026 | 126916026 | + | C | C |
| X  | 106841147 | 106841147 | + | G | G |
| 14 | 74967633  | 74967633  | + | C | C |
| 21 | 34648962  | 34648962  | + | C | C |
| 5  | 24488226  | 24488226  | + | C | C |
| 6  | 148050740 | 148050740 | + | G | G |
| 3  | 130125157 | 130125157 | + | G | G |
| 11 | 111167077 | 111167077 | + | G | G |
| 5  | 3599406   | 3599406   | + | C | C |
| 17 | 71389859  | 71389859  | + | G | G |
| 11 | 65735000  | 65735000  | + | C | C |
| 3  | 183911530 | 183911530 | + | C | C |
| 16 | 842094    | 842094    | + | C | C |
| 19 | 49686396  | 49686396  | + | C | C |
| 16 | 4408248   | 4408248   | + | G | G |
| 1  | 100613768 | 100613768 | + | C | C |
| 6  | 138612976 | 138612976 | + | C | C |
| 16 | 29678337  | 29678337  | + | G | G |
| 17 | 39538210  | 39538210  | + | G | G |
| 12 | 93936396  | 93936396  | + | G | G |
| 1  | 32936895  | 32936895  | + | C | C |
| 7  | 38305176  | 38305176  | + | C | C |
| 1  | 38187508  | 38187508  | + | C | C |
| 6  | 32522581  | 32522581  | + | C | C |
| 12 | 70986137  | 70986137  | + | C | C |
| 5  | 176314727 | 176314727 | + | C | C |
| 3  | 183910943 | 183910943 | + | G | G |
| 11 | 100998826 | 100998826 | + | C | C |
| 9  | 14841500  | 14841500  | + | G | G |
| 11 | 40136935  | 40136935  | + | C | C |
| 6  | 168445647 | 168445647 | + | C | C |
| 5  | 64756126  | 64756126  | + | C | C |
| 7  | 48027040  | 48027040  | + | C | C |
| 17 | 45901790  | 45901790  | + | C | C |
| 2  | 170011041 | 170011041 | + | G | G |
| 7  | 128355738 | 128355738 | + | C | C |
| 8  | 135649870 | 135649870 | + | G | G |
| 19 | 48205592  | 48205592  | + | C | C |

|    |           |           |   |   |   |
|----|-----------|-----------|---|---|---|
| 1  | 207782655 | 207782655 | + | C | C |
| 4  | 106510530 | 106510530 | + | G | G |
| 8  | 89053892  | 89053892  | + | C | C |
| 12 | 7882181   | 7882181   | + | G | G |
| 3  | 119328423 | 119328423 | + | G | G |
| 18 | 6999962   | 6999962   | + | C | C |
| 15 | 79254495  | 79254495  | + | G | G |
| 8  | 16974075  | 16974075  | + | G | G |
| 17 | 38122069  | 38122069  | + | G | G |
| 1  | 84944976  | 84944976  | + | C | C |
| 11 | 82959242  | 82959242  | + | T | T |
| 11 | 123813841 | 123813841 | + | C | C |
| 15 | 89424904  | 89424904  | + | G | G |
| 14 | 64491123  | 64491123  | + | C | C |
| 19 | 12911751  | 12911751  | + | G | G |
| 17 | 30611783  | 30611783  | + | C | C |
| 7  | 100282378 | 100282378 | + | C | C |
| 10 | 26849122  | 26849122  | + | G | G |
| 17 | 8135091   | 8135091   | + | A | A |
| 19 | 12856560  | 12856560  | + | C | C |
| 2  | 179438501 | 179438501 | + | G | G |
| 22 | 33700241  | 33700241  | + | G | G |
| 1  | 16043305  | 16043305  | + | G | G |
| 17 | 46030461  | 46030461  | + | G | G |
| 12 | 108010929 | 108010929 | + | G | G |
| 12 | 101598313 | 101598313 | + | G | G |
| 9  | 68414834  | 68414834  | + | C | C |
| 16 | 56624038  | 56624038  | + | G | G |
| 7  | 138603045 | 138603045 | + | C | C |
| 6  | 25813153  | 25813153  | + | G | G |
| 17 | 32906219  | 32906219  | + | G | G |
| 8  | 104922629 | 104922629 | + | G | G |
| 3  | 46875301  | 46875301  | + | C | C |
| 7  | 27213291  | 27213291  | + | C | C |
| 5  | 101834520 | 101834520 | + | C | C |
| 20 | 31601720  | 31601720  | + | C | C |
| X  | 115304404 | 115304404 | + | G | G |
| 2  | 219000187 | 219000187 | + | C | C |
| 3  | 113955113 | 113955113 | + | C | C |
| 20 | 368777    | 368777    | + | C | C |
| 2  | 179632624 | 179632624 | + | G | G |
| 2  | 61006904  | 61006904  | + | C | C |
| 7  | 100320700 | 100320700 | + | C | C |

|    |           |           |   |   |   |
|----|-----------|-----------|---|---|---|
| 7  | 97862957  | 97862957  | + | G | G |
| 3  | 196736629 | 196736629 | + | G | G |
| 19 | 1112050   | 1112050   | + | C | C |
| 2  | 210683964 | 210683964 | + | G | G |
| 1  | 111963993 | 111963993 | + | G | G |
| 5  | 167957409 | 167957409 | + | G | G |
| 8  | 2148698   | 2148698   | + | C | C |
| 8  | 117859824 | 117859824 | + | T | T |
| 1  | 228547542 | 228547542 | + | G | G |
| 12 | 18499726  | 18499726  | + | C | C |
| 3  | 169540230 | 169540230 | + | G | G |
| 21 | 37617503  | 37617503  | + | C | C |
| 19 | 48305051  | 48305051  | + | C | C |
| 12 | 68696496  | 68696496  | + | G | G |
| 16 | 72042659  | 72042659  | + | G | G |
| 5  | 134147385 | 134147385 | + | G | G |
| 14 | 94156491  | 94156491  | + | C | C |
| 7  | 98513435  | 98513435  | + | G | G |
| 9  | 6558672   | 6558672   | + | G | G |
| 16 | 70867921  | 70867921  | + | G | G |
| 1  | 164818554 | 164818554 | + | C | C |
| 19 | 8530307   | 8530307   | + | C | C |
| 3  | 195781984 | 195781984 | + | C | C |
| 12 | 110600796 | 110600796 | + | C | C |
| 14 | 23902377  | 23902377  | + | G | G |
| 11 | 102710977 | 102710977 | + | G | G |
| 19 | 30206207  | 30206207  | + | C | C |
| 22 | 45810239  | 45810239  | + | C | C |
| 11 | 1642956   | 1642956   | + | G | G |
| 22 | 32828428  | 32828428  | + | G | G |
| 16 | 49407878  | 49407878  | + | G | G |
| 17 | 74581766  | 74581766  | + | C | C |
| 8  | 53062531  | 53062531  | + | C | C |
| 2  | 169791748 | 169791748 | + | C | C |
| 1  | 152732182 | 152732182 | + | C | C |
| 1  | 230814735 | 230814735 | + | G | G |
| 8  | 108509805 | 108509805 | + | C | C |
| 17 | 45473307  | 45473307  | + | G | G |
| 3  | 150690557 | 150690557 | + | G | G |
| 7  | 27192327  | 27192327  | + | C | C |
| 18 | 22023037  | 22023037  | + | C | C |
| 6  | 10831027  | 10831027  | + | C | C |
| 17 | 27037987  | 27037987  | + | G | G |

|    |           |           |   |   |   |
|----|-----------|-----------|---|---|---|
| X  | 107417713 | 107417713 | + | C | C |
| 15 | 75189215  | 75189215  | + | C | C |
| 13 | 29600542  | 29600542  | + | G | G |
| 8  | 101153393 | 101153393 | + | C | C |
| 17 | 46024334  | 46024334  | + | G | G |
| 5  | 31799625  | 31799625  | + | C | C |
| 22 | 30639490  | 30639490  | + | G | G |
| 15 | 91546358  | 91546358  | + | A | A |
| 22 | 28492397  | 28492397  | + | C | C |
| 1  | 89849794  | 89849794  | + | G | G |
| 1  | 2938970   | 2938970   | + | G | G |
| 19 | 53513812  | 53513812  | + | G | G |
| 1  | 120351479 | 120351479 | + | C | C |
| 19 | 3557399   | 3557399   | + | C | C |
| 6  | 36870049  | 36870049  | + | C | C |
| 14 | 97299860  | 97299860  | + | C | C |
| 7  | 133984255 | 133984255 | + | C | C |
| 21 | 44513267  | 44513267  | + | C | C |
| 11 | 722722    | 722722    | + | C | C |
| 14 | 92159496  | 92159496  | + | G | G |
| 2  | 120124728 | 120124728 | + | C | C |
| 19 | 55179527  | 55179527  | + | G | G |
| 21 | 26978860  | 26978860  | + | G | G |
| 7  | 91843226  | 91843226  | + | G | G |
| 6  | 6305658   | 6305658   | + | G | G |
| 9  | 90536544  | 90536544  | + | G | G |
| 2  | 206166306 | 206166306 | + | G | G |
| 7  | 141872500 | 141872500 | + | G | G |
| 8  | 71486432  | 71486432  | + | C | C |
| 19 | 42223925  | 42223925  | + | T | T |
| 22 | 50018131  | 50018131  | + | C | C |
| 12 | 10313041  | 10313041  | + | A | A |
| 5  | 13901544  | 13901544  | + | G | G |
| 22 | 37865909  | 37865909  | + | C | C |
| 11 | 73022621  | 73022621  | + | C | C |
| 2  | 73717929  | 73717929  | + | C | C |
| 19 | 38379457  | 38379457  | + | C | C |
| 3  | 112357792 | 112357792 | + | G | G |
| 14 | 95081041  | 95081041  | + | C | C |
| 1  | 1111504   | 1111504   | + | G | G |
| 22 | 30951447  | 30951447  | + | G | G |
| 5  | 50117092  | 50117092  | + | C | C |
| 8  | 145699471 | 145699471 | + | G | G |

|    |           |           |   |   |   |
|----|-----------|-----------|---|---|---|
| 5  | 140711128 | 140711128 | + | C | C |
| 3  | 47046518  | 47046518  | + | C | C |
| 15 | 75562473  | 75562473  | + | G | G |
| 11 | 55322142  | 55322142  | + | C | C |
| 12 | 104031812 | 104031812 | + | G | G |
| 1  | 230468737 | 230468737 | + | G | G |
| 19 | 57085674  | 57085674  | + | C | C |
| 6  | 89888568  | 89888568  | + | G | G |
| 9  | 96054856  | 96054856  | + | C | C |
| 20 | 3102862   | 3102862   | + | A | A |
| 2  | 171509779 | 171509779 | + | C | C |
| 5  | 26916004  | 26916004  | + | C | C |
| 12 | 55846659  | 55846659  | + | G | G |
| 20 | 37464812  | 37464812  | + | G | G |
| 11 | 5172820   | 5172820   | + | G | G |
| 3  | 196387093 | 196387093 | + | C | C |
| 16 | 85952048  | 85952048  | + | C | C |
| 7  | 99590366  | 99590366  | + | C | C |
| 22 | 42120012  | 42120012  | + | G | G |
| 1  | 6636587   | 6636587   | + | G | G |
| 2  | 228996707 | 228996707 | + | C | C |
| 14 | 106791239 | 106791239 | + | G | G |
| 2  | 68270018  | 68270018  | + | A | A |
| 1  | 247737445 | 247737445 | + | G | G |
| 16 | 10274121  | 10274121  | + | C | C |
| 11 | 16838504  | 16838504  | + | G | G |
| 6  | 28185999  | 28185999  | + | A | A |
| 11 | 82997050  | 82997050  | + | G | G |
| 1  | 27677206  | 27677206  | + | G | G |
| 19 | 23159465  | 23159465  | + | T | T |
| 17 | 41939165  | 41939165  | + | G | G |
| 21 | 44270083  | 44270083  | + | G | G |
| 2  | 26411046  | 26411046  | + | C | C |
| 3  | 120369629 | 120369629 | + | C | C |
| 17 | 77915960  | 77915960  | + | A | A |
| 17 | 39643975  | 39643975  | + | G | G |
| 16 | 84914151  | 84914151  | + | C | C |
| 17 | 10265785  | 10265785  | + | C | C |
| 16 | 71483545  | 71483545  | + | G | G |
| 16 | 81711913  | 81711913  | + | G | G |
| 14 | 92054395  | 92054395  | + | C | C |
| 14 | 94404135  | 94404135  | + | G | G |
| 19 | 49990722  | 49990722  | + | G | G |

|    |           |           |   |   |   |
|----|-----------|-----------|---|---|---|
| 17 | 17714625  | 17714625  | + | A | A |
| 10 | 104179842 | 104179842 | + | C | C |
| 17 | 63822294  | 63822294  | + | G | G |
| 17 | 47659224  | 47659224  | + | G | G |
| 14 | 22675889  | 22675889  | + | G | G |
| 17 | 3181246   | 3181246   | + | G | G |
| 2  | 179593061 | 179593061 | + | G | G |
| 15 | 90213436  | 90213436  | + | G | G |
| 6  | 32160383  | 32160383  | + | G | G |
| 1  | 160313094 | 160313094 | + | G | G |
| 12 | 57881777  | 57881777  | + | A | A |
| 6  | 32191718  | 32191718  | + | T | T |
| 15 | 66977727  | 66977727  | + | C | C |
| 5  | 140730569 | 140730569 | + | C | C |
| 19 | 38376783  | 38376783  | + | A | A |
| 1  | 215847978 | 215847978 | + | C | C |
| 3  | 41746765  | 41746765  | + | C | C |
| 19 | 5739429   | 5739429   | + | G | G |
| 11 | 574197    | 574197    | + | C | C |
| 2  | 28532824  | 28532824  | + | C | C |
| 22 | 19197937  | 19197937  | + | A | A |
| 14 | 24041038  | 24041038  | + | C | C |
| 6  | 29894534  | 29894534  | + | C | C |
| 3  | 124141727 | 124141727 | + | C | C |
| 14 | 22975611  | 22975611  | + | A | A |
| 14 | 88877110  | 88877110  | + | G | G |
| 3  | 57469189  | 57469189  | + | C | C |
| 16 | 626261    | 626261    | + | G | G |
| 3  | 151012533 | 151012533 | + | C | C |
| 7  | 102738821 | 102738821 | + | C | C |
| 12 | 21168708  | 21168708  | + | G | G |
| 11 | 116728832 | 116728832 | + | C | C |
| 19 | 40581487  | 40581487  | + | G | G |
| 11 | 822471    | 822471    | + | C | C |
| 21 | 40977863  | 40977863  | + | C | C |
| 3  | 120952498 | 120952498 | + | G | G |
| 22 | 43564824  | 43564824  | + | A | A |
| 19 | 12359014  | 12359014  | + | G | G |
| 16 | 30001081  | 30001081  | + | G | G |
| 20 | 39981477  | 39981477  | + | C | C |
| 8  | 53085141  | 53085141  | + | C | C |
| 15 | 86205685  | 86205685  | + | G | G |
| 19 | 5772933   | 5772933   | + | C | C |



|    |           |           |   |   |   |
|----|-----------|-----------|---|---|---|
| 5  | 56546911  | 56546911  | + | G | G |
| 11 | 55746706  | 55746706  | + | G | G |
| 1  | 142620871 | 142620871 | + | G | G |
| 9  | 139342907 | 139342907 | + | G | G |
| 7  | 20721273  | 20721273  | + | C | C |
| 12 | 129694156 | 129694156 | + | G | G |
| 17 | 41165562  | 41165562  | + | G | G |
| 1  | 202719861 | 202719861 | + | G | G |
| 3  | 4357934   | 4357934   | + | A | A |
| 2  | 40392026  | 40392026  | + | C | C |
| 13 | 49933877  | 49933877  | + | G | G |
| 7  | 45124717  | 45124717  | + | C | C |
| 22 | 39066937  | 39066937  | + | C | C |
| 19 | 34263621  | 34263621  | + | G | G |
| 1  | 94485272  | 94485272  | + | A | A |
| 12 | 85450544  | 85450544  | + | T | T |
| 7  | 120935621 | 120935621 | + | C | C |
| 10 | 43015677  | 43015677  | + | G | G |
| 3  | 61547812  | 61547812  | + | C | C |
| 8  | 123965221 | 123965221 | + | C | C |
| 10 | 96702172  | 96702172  | + | C | C |
| 11 | 7982354   | 7982354   | + | G | G |
| 1  | 144873951 | 144873951 | + | G | G |
| 2  | 127944707 | 127944707 | + | C | C |
| 22 | 36960493  | 36960493  | + | C | C |
| 9  | 117228643 | 117228643 | + | G | G |
| 2  | 108488342 | 108488342 | + | C | C |
| 5  | 111598228 | 111598228 | + | G | G |
| 14 | 59835526  | 59835526  | + | C | C |
| 20 | 62839543  | 62839543  | + | G | G |
| 17 | 10236444  | 10236444  | + | C | C |
| 6  | 55145252  | 55145252  | + | C | C |
| 14 | 91739723  | 91739723  | + | G | G |
| 7  | 99933594  | 99933594  | + | T | T |
| 1  | 82409224  | 82409224  | + | G | G |
| 8  | 144520093 | 144520093 | + | G | G |
| 5  | 1208908   | 1208908   | + | C | C |
| 8  | 41790161  | 41790161  | + | G | G |
| 2  | 98887342  | 98887342  | + | G | G |
| 2  | 167301279 | 167301279 | + | C | C |
| 4  | 113544997 | 113544997 | + | C | C |
| 14 | 70236212  | 70236212  | + | A | A |
| 2  | 28843811  | 28843811  | + | G | G |

|            |           |           |   |   |   |
|------------|-----------|-----------|---|---|---|
| 16         | 84014667  | 84014667  | + | G | G |
| 19         | 53793231  | 53793231  | + | C | C |
| 5          | 179225310 | 179225310 | + | G | G |
| 7          | 150217800 | 150217800 | + | G | G |
| 2          | 40655708  | 40655708  | + | G | G |
| 1          | 155255018 | 155255018 | + | C | C |
| 14         | 88945681  | 88945681  | + | C | C |
| 9          | 138667165 | 138667165 | + | G | G |
| 14         | 92608650  | 92608650  | + | C | C |
| 11         | 56409512  | 56409512  | + | G | G |
| 8          | 11189597  | 11189597  | + | C | C |
| 22         | 29674069  | 29674069  | + | T | T |
| 1          | 12183797  | 12183797  | + | G | G |
| GL000218.1 | 53637     | 53637     | + | A | A |
| 6          | 47754302  | 47754302  | + | G | G |
| 12         | 49936549  | 49936549  | + | G | G |
| 10         | 98155766  | 98155766  | + | C | C |
| 11         | 5173543   | 5173543   | + | G | G |
| 2          | 228116062 | 228116062 | + | G | G |
| 7          | 100486706 | 100486706 | + | C | C |
| 19         | 59028330  | 59028330  | + | G | G |
| 19         | 59022850  | 59022850  | + | G | G |
| 8          | 106813457 | 106813457 | + | G | G |
| 9          | 78911664  | 78911664  | + | G | G |
| 18         | 31324810  | 31324810  | + | T | T |
| 1          | 79387371  | 79387371  | + | T | T |
| 11         | 45956694  | 45956694  | + | G | G |
| 3          | 49662470  | 49662470  | + | C | C |
| X          | 3524562   | 3524562   | + | G | G |
| 5          | 76251500  | 76251500  | + | A | A |
| 7          | 143826750 | 143826750 | + | C | C |
| 1          | 151491052 | 151491052 | + | G | G |
| 20         | 9560816   | 9560816   | + | G | G |
| 10         | 50714025  | 50714025  | + | C | C |
| 7          | 91792607  | 91792607  | + | C | C |
| 1          | 227335215 | 227335215 | + | C | C |
| 2          | 174062776 | 174062776 | + | G | G |
| 7          | 99032843  | 99032843  | + | C | C |
| 1          | 207649702 | 207649702 | + | G | G |
| 3          | 111899473 | 111899473 | + | C | C |
| 8          | 110986330 | 110986330 | + | G | G |
| 11         | 124747700 | 124747700 | + | C | C |
| 12         | 48723512  | 48723512  | + | G | G |

|    |           |           |   |   |   |
|----|-----------|-----------|---|---|---|
| 20 | 6759184   | 6759184   | + | G | G |
| 17 | 6945739   | 6945739   | + | A | A |
| 8  | 29989425  | 29989425  | + | C | C |
| 11 | 120008485 | 120008485 | + | G | G |
| 2  | 132021678 | 132021678 | + | G | G |
| 15 | 54306616  | 54306616  | + | G | G |
| 16 | 602128    | 602128    | + | C | C |
| 2  | 133543192 | 133543192 | + | C | C |
| 8  | 37687369  | 37687369  | + | G | G |
| 17 | 21117574  | 21117574  | + | G | G |
| 8  | 4277512   | 4277512   | + | G | G |
| 9  | 114134826 | 114134826 | + | G | G |
| 6  | 122741307 | 122741307 | + | C | C |
| 17 | 20424950  | 20424950  | + | G | G |
| 16 | 84792348  | 84792348  | + | C | C |
| 19 | 3119014   | 3119014   | + | G | G |
| 17 | 33427850  | 33427850  | + | C | C |
| 5  | 81571085  | 81571085  | + | T | T |
| 1  | 111968034 | 111968034 | + | G | G |
| 6  | 143093747 | 143093747 | + | G | G |
| 1  | 145460204 | 145460204 | + | C | C |
| 2  | 230902163 | 230902163 | + | A | A |
| 2  | 136575327 | 136575327 | + | C | C |
| 7  | 76959570  | 76959570  | + | G | G |
| 8  | 110451162 | 110451162 | + | G | G |
| 20 | 57828183  | 57828183  | + | G | G |
| 18 | 50994349  | 50994349  | + | G | G |
| 1  | 196705992 | 196705992 | + | C | C |
| 19 | 44117376  | 44117376  | + | C | C |
| 1  | 43855557  | 43855557  | + | C | C |
| 9  | 140878645 | 140878645 | + | C | C |
| 10 | 15255504  | 15255504  | + | C | C |
| 17 | 72363773  | 72363773  | + | G | G |
| 2  | 191114415 | 191114415 | + | G | G |
| 19 | 8212303   | 8212303   | + | G | G |
| 7  | 100771719 | 100771719 | + | C | C |
| 8  | 145745335 | 145745335 | + | C | C |
| 20 | 60901960  | 60901960  | + | G | G |
| 1  | 21180070  | 21180070  | + | G | G |
| 14 | 94942631  | 94942631  | + | G | G |
| 1  | 166991060 | 166991060 | + | G | G |
| 13 | 110823029 | 110823029 | + | G | G |
| 7  | 150761401 | 150761401 | + | G | G |

|    |           |           |   |   |   |
|----|-----------|-----------|---|---|---|
| 3  | 127323915 | 127323915 | + | C | C |
| 5  | 98129574  | 98129574  | + | T | T |
| 3  | 51897063  | 51897063  | + | C | C |
| 20 | 62369815  | 62369815  | + | C | C |
| 13 | 101755534 | 101755534 | + | C | C |
| 14 | 65194561  | 65194561  | + | T | T |
| 19 | 9069347   | 9069347   | + | G | G |
| 5  | 22078849  | 22078849  | + | C | C |
| 15 | 40589733  | 40589733  | + | C | C |
| 5  | 156589901 | 156589901 | + | C | C |
| 19 | 53015412  | 53015412  | + | C | C |
| 4  | 8609056   | 8609056   | + | C | C |
| 11 | 118037662 | 118037662 | + | C | C |
| 2  | 202060612 | 202060612 | + | C | C |
| 19 | 58880471  | 58880471  | + | C | C |
| 8  | 39114774  | 39114774  | + | C | C |
| 15 | 59911232  | 59911232  | + | G | G |
| 6  | 25701643  | 25701643  | + | G | G |
| 3  | 27326179  | 27326179  | + | C | C |
| 22 | 46627912  | 46627912  | + | G | G |
| 12 | 41463908  | 41463908  | + | C | C |
| 12 | 10370710  | 10370710  | + | A | A |
| 20 | 36500357  | 36500357  | + | G | G |
| 15 | 38233881  | 38233881  | + | G | G |
| 7  | 100319300 | 100319300 | + | G | G |
| 18 | 34654768  | 34654768  | + | C | C |
| 7  | 151503979 | 151503979 | + | G | G |
| 19 | 9070083   | 9070083   | + | C | C |
| 2  | 132275388 | 132275388 | + | C | C |
| 19 | 30165091  | 30165091  | + | C | C |
| 17 | 5433315   | 5433315   | + | G | G |
| 4  | 41682022  | 41682022  | + | G | G |
| 7  | 119914668 | 119914668 | + | C | C |
| 19 | 54705459  | 54705459  | + | C | C |
| 10 | 24813345  | 24813345  | + | G | G |
| 17 | 4712842   | 4712842   | + | G | G |
| 8  | 24212065  | 24212065  | + | G | G |
| 9  | 35685292  | 35685292  | + | C | C |
| 2  | 61544851  | 61544851  | + | G | G |
| 17 | 7667463   | 7667463   | + | G | G |
| X  | 3235774   | 3235774   | + | G | G |
| 12 | 21689698  | 21689698  | + | G | G |
| 1  | 196918720 | 196918720 | + | C | C |

|    |           |           |   |   |   |
|----|-----------|-----------|---|---|---|
| 2  | 135711373 | 135711373 | + | C | C |
| 17 | 58259103  | 58259103  | + | G | G |
| 8  | 87559960  | 87559960  | + | C | C |
| 7  | 71175768  | 71175768  | + | G | G |
| X  | 117526998 | 117526998 | + | C | C |
| 7  | 99767825  | 99767825  | + | C | C |
| 2  | 30974084  | 30974084  | + | G | G |
| 7  | 141672872 | 141672872 | + | G | G |
| X  | 118222004 | 118222004 | + | G | G |
| 18 | 31320366  | 31320366  | + | G | G |
| 11 | 31811120  | 31811120  | + | C | C |
| 11 | 113560489 | 113560489 | + | G | G |
| 20 | 47849903  | 47849903  | + | C | C |
| 12 | 113307802 | 113307802 | + | G | G |
| 17 | 3100934   | 3100934   | + | G | G |
| 21 | 30365231  | 30365231  | + | C | C |
| 11 | 114398599 | 114398599 | + | C | C |
| 14 | 104979108 | 104979108 | + | A | A |
| 14 | 53525319  | 53525319  | + | G | G |
| 19 | 45324045  | 45324045  | + | G | G |
| 14 | 77279247  | 77279247  | + | C | C |
| 2  | 210804304 | 210804304 | + | G | G |
| 1  | 247978641 | 247978641 | + | C | C |
| 3  | 121340858 | 121340858 | + | G | G |
| 20 | 45092816  | 45092816  | + | C | C |
| 12 | 49420178  | 49420178  | + | G | G |
| 19 | 2767621   | 2767621   | + | G | G |
| 16 | 31408927  | 31408927  | + | G | G |
| 20 | 41101135  | 41101135  | + | C | C |
| 5  | 133482075 | 133482075 | + | C | C |
| 3  | 38129820  | 38129820  | + | C | C |
| 11 | 59132795  | 59132795  | + | C | C |
| 19 | 54314241  | 54314241  | + | G | G |
| 9  | 37741026  | 37741026  | + | C | C |
| 8  | 30704148  | 30704148  | + | C | C |
| 11 | 4406733   | 4406733   | + | G | G |
| 1  | 38006029  | 38006029  | + | G | G |
| 11 | 76751294  | 76751294  | + | C | C |
| 14 | 100608115 | 100608115 | + | G | G |
| 1  | 184765110 | 184765110 | + | G | G |
| 6  | 169634990 | 169634990 | + | C | C |
| 9  | 38395907  | 38395907  | + | C | C |
| 3  | 49145877  | 49145877  | + | G | G |

|    |           |           |   |   |   |
|----|-----------|-----------|---|---|---|
| 21 | 10951412  | 10951412  | + | G | G |
| 15 | 41136293  | 41136293  | + | C | C |
| 2  | 73957032  | 73957032  | + | C | C |
| 12 | 88502932  | 88502932  | + | T | T |
| 20 | 56179365  | 56179365  | + | G | G |
| 3  | 38966983  | 38966983  | + | G | G |
| 2  | 37096700  | 37096700  | + | T | T |
| 6  | 168445506 | 168445506 | + | G | G |
| 1  | 34666372  | 34666372  | + | G | G |
| 2  | 108443451 | 108443451 | + | G | G |
| 12 | 3742804   | 3742804   | + | C | C |
| 17 | 34182033  | 34182033  | + | G | G |
| 14 | 38170651  | 38170651  | + | G | G |
| 7  | 113558777 | 113558777 | + | A | A |
| 18 | 10672860  | 10672860  | + | G | G |
| 2  | 241404627 | 241404627 | + | G | G |
| 3  | 20181776  | 20181776  | + | G | G |
| 12 | 113596885 | 113596885 | + | G | G |
| 12 | 133234478 | 133234478 | + | G | G |
| 19 | 46195228  | 46195228  | + | C | C |
| 4  | 155511886 | 155511886 | + | G | G |
| 19 | 8604840   | 8604840   | + | G | G |
| 11 | 72282212  | 72282212  | + | G | G |
| 6  | 31918192  | 31918192  | + | A | A |
| 6  | 31852906  | 31852906  | + | G | G |
| 1  | 216692707 | 216692707 | + | C | C |
| 14 | 22948553  | 22948553  | + | A | A |
| 22 | 40807366  | 40807366  | + | C | C |
| 6  | 129959711 | 129959711 | + | G | G |
| 19 | 7626530   | 7626530   | + | C | C |
| 7  | 116838395 | 116838395 | + | C | C |
| 15 | 32450802  | 32450802  | + | C | C |
| 6  | 54122152  | 54122152  | + | C | C |
| 3  | 38565730  | 38565730  | + | C | C |
| 2  | 63609227  | 63609227  | + | C | C |
| 22 | 38165316  | 38165316  | + | C | C |
| X  | 23019859  | 23019859  | + | G | G |
| 11 | 67286594  | 67286594  | + | C | C |
| 8  | 104337070 | 104337070 | + | C | C |
| 2  | 109380785 | 109380785 | + | T | T |
| 17 | 20424949  | 20424949  | + | G | G |
| 6  | 39874156  | 39874156  | + | G | G |
| 1  | 82416061  | 82416061  | + | C | C |

|    |           |           |   |   |   |
|----|-----------|-----------|---|---|---|
| 11 | 45793113  | 45793113  | + | C | C |
| 11 | 76918263  | 76918263  | + | C | C |
| 11 | 7111096   | 7111096   | + | C | C |
| 15 | 20644271  | 20644271  | + | G | G |
| 2  | 160710183 | 160710183 | + | C | C |
| 3  | 126270907 | 126270907 | + | C | C |
| 7  | 151874137 | 151874137 | + | T | T |
| 20 | 3843036   | 3843036   | + | G | G |
| 15 | 85438750  | 85438750  | + | C | C |
| 17 | 48154372  | 48154372  | + | C | C |
| 2  | 74756893  | 74756893  | + | G | G |
| 7  | 86554885  | 86554885  | + | G | G |
| 16 | 31073471  | 31073471  | + | C | C |
| 12 | 30884378  | 30884378  | + | G | G |
| 19 | 35899349  | 35899349  | + | G | G |
| 1  | 40705641  | 40705641  | + | C | C |
| 2  | 113820168 | 113820168 | + | G | G |
| 11 | 61160100  | 61160100  | + | G | G |
| 17 | 37009987  | 37009987  | + | A | A |
| 2  | 27715292  | 27715292  | + | C | C |
| 15 | 42386740  | 42386740  | + | G | G |
| 2  | 24433655  | 24433655  | + | G | G |
| 1  | 190067802 | 190067802 | + | C | C |
| 9  | 67281799  | 67281799  | + | G | G |
| 16 | 30900119  | 30900119  | + | C | C |
| 2  | 27930698  | 27930698  | + | C | C |
| 15 | 75189214  | 75189214  | + | C | C |
| 7  | 122338926 | 122338926 | + | G | G |
| 15 | 100332885 | 100332885 | + | G | G |
| 1  | 155533099 | 155533099 | + | G | G |
| 14 | 78392203  | 78392203  | + | G | G |
| 9  | 38543328  | 38543328  | + | G | G |
| 21 | 46603378  | 46603378  | + | C | C |
| 7  | 23728365  | 23728365  | + | C | C |
| 14 | 91780281  | 91780281  | + | C | C |
| 2  | 85780613  | 85780613  | + | G | G |
| 2  | 43625166  | 43625166  | + | G | G |
| 1  | 3328601   | 3328601   | + | G | G |
| 19 | 52249308  | 52249308  | + | G | G |
| 1  | 143767710 | 143767710 | + | G | G |
| 17 | 27011962  | 27011962  | + | G | G |
| 11 | 5475332   | 5475332   | + | C | C |
| 8  | 27630171  | 27630171  | + | C | C |

|    |           |           |   |   |   |
|----|-----------|-----------|---|---|---|
| 5  | 35790141  | 35790141  | + | G | G |
| 16 | 70977772  | 70977772  | + | C | C |
| 7  | 141840824 | 141840824 | + | C | C |
| 16 | 2506943   | 2506943   | + | C | C |
| 16 | 24870021  | 24870021  | + | T | T |
| 11 | 31823137  | 31823137  | + | C | C |
| 6  | 29641208  | 29641208  | + | C | C |
| 2  | 198273269 | 198273269 | + | G | G |
| 3  | 112693795 | 112693795 | + | C | C |
| 5  | 1214132   | 1214132   | + | C | C |
| X  | 110970614 | 110970614 | + | T | T |
| 12 | 3982442   | 3982442   | + | C | C |
| 9  | 66459845  | 66459845  | + | G | G |
| 1  | 157660198 | 157660198 | + | C | C |
| 3  | 119263599 | 119263599 | + | C | C |
| 7  | 7420294   | 7420294   | + | A | A |
| 16 | 30776281  | 30776281  | + | G | G |
| 17 | 72943410  | 72943410  | + | G | G |
| 5  | 140778754 | 140778754 | + | G | G |
| 2  | 80846225  | 80846225  | + | A | A |
| 2  | 238285471 | 238285471 | + | A | A |
| 19 | 46270287  | 46270287  | + | G | G |
| 2  | 234750269 | 234750269 | + | G | G |
| 3  | 11383608  | 11383608  | + | G | G |
| 4  | 47322220  | 47322220  | + | G | G |
| 14 | 92185795  | 92185795  | + | C | C |
| 1  | 62263027  | 62263027  | + | G | G |
| 20 | 44579199  | 44579199  | + | G | G |
| 1  | 16862595  | 16862595  | + | C | C |
| 1  | 3379681   | 3379681   | + | G | G |
| 20 | 30432320  | 30432320  | + | G | G |
| 12 | 113532914 | 113532914 | + | G | G |
| 3  | 139280071 | 139280071 | + | G | G |
| 11 | 7110389   | 7110389   | + | G | G |
| 1  | 248129394 | 248129394 | + | C | C |
| 1  | 228645174 | 228645174 | + | T | T |
| 18 | 47108041  | 47108041  | + | C | C |
| 22 | 24583645  | 24583645  | + | C | C |
| 19 | 5668213   | 5668213   | + | C | C |
| 17 | 43318530  | 43318530  | + | C | C |
| 4  | 52943038  | 52943038  | + | G | G |
| 19 | 7117139   | 7117139   | + | G | G |
| 1  | 231401043 | 231401043 | + | C | C |



|    |           |           |   |   |   |
|----|-----------|-----------|---|---|---|
| 2  | 179442498 | 179442498 | + | C | C |
| 4  | 367646    | 367646    | + | A | A |
| 6  | 26250716  | 26250716  | + | G | G |
| 1  | 85121589  | 85121589  | + | A | A |
| 12 | 99201656  | 99201656  | + | C | C |
| 19 | 44777362  | 44777362  | + | G | G |
| 6  | 32908600  | 32908600  | + | G | G |
| 11 | 48238668  | 48238668  | + | C | C |
| X  | 14627186  | 14627186  | + | C | C |
| 3  | 151105724 | 151105724 | + | G | G |
| 11 | 17474789  | 17474789  | + | G | G |
| 15 | 90272977  | 90272977  | + | A | A |
| 2  | 131522198 | 131522198 | + | C | C |
| 17 | 7800456   | 7800456   | + | A | A |
| 10 | 5498922   | 5498922   | + | C | C |
| 2  | 240033339 | 240033339 | + | C | C |
| 3  | 58519800  | 58519800  | + | C | C |
| 8  | 27320998  | 27320998  | + | G | G |
| 11 | 3050297   | 3050297   | + | G | G |
| 2  | 227920818 | 227920818 | + | C | C |
| 20 | 39316757  | 39316757  | + | G | G |
| 22 | 26887731  | 26887731  | + | T | T |
| 19 | 3759891   | 3759891   | + | G | G |
| 20 | 42697461  | 42697461  | + | G | G |
| 17 | 21826103  | 21826103  | + | A | A |
| 14 | 102898295 | 102898295 | + | C | C |
| 11 | 123811110 | 123811110 | + | C | C |
| 2  | 11810277  | 11810277  | + | C | C |
| 2  | 209309521 | 209309521 | + | C | C |
| X  | 14861817  | 14861817  | + | T | T |
| 7  | 4116719   | 4116719   | + | G | G |
| 5  | 140256446 | 140256446 | + | C | C |
| 11 | 15994311  | 15994311  | + | G | G |
| 4  | 100263983 | 100263983 | + | G | G |
| 6  | 36178083  | 36178083  | + | G | G |
| 3  | 158363430 | 158363430 | + | G | G |
| 11 | 17099295  | 17099295  | + | G | G |
| 8  | 54155336  | 54155336  | + | G | G |
| 3  | 126216936 | 126216936 | + | C | C |
| 1  | 152188311 | 152188311 | + | G | G |
| 2  | 231152607 | 231152607 | + | G | G |
| 3  | 130107715 | 130107715 | + | C | C |
| 4  | 2306913   | 2306913   | + | G | G |

|    |           |           |   |   |   |
|----|-----------|-----------|---|---|---|
| 11 | 47182770  | 47182770  | + | C | C |
| 1  | 55165845  | 55165845  | + | G | G |
| 16 | 19020698  | 19020698  | + | G | G |
| 10 | 47133637  | 47133637  | + | C | C |
| 4  | 69798425  | 69798425  | + | G | G |
| 21 | 36042129  | 36042129  | + | C | C |
| 11 | 62623745  | 62623745  | + | G | G |
| 3  | 122002865 | 122002865 | + | C | C |
| 19 | 55284838  | 55284838  | + | G | G |
| 19 | 37039150  | 37039150  | + | C | C |
| 18 | 59212293  | 59212293  | + | G | G |
| 12 | 115112157 | 115112157 | + | C | C |
| 7  | 77885164  | 77885164  | + | C | C |
| 1  | 222717406 | 222717406 | + | G | G |
| X  | 117527073 | 117527073 | + | C | C |
| 3  | 50618069  | 50618069  | + | C | C |
| 6  | 25452488  | 25452488  | + | C | C |
| 11 | 24927568  | 24927568  | + | G | G |
| 3  | 118935066 | 118935066 | + | G | G |
| 21 | 27062206  | 27062206  | + | G | G |
| 7  | 150269991 | 150269991 | + | A | A |
| 5  | 32000341  | 32000341  | + | C | C |
| 2  | 98779326  | 98779326  | + | G | G |
| 12 | 52825840  | 52825840  | + | C | C |
| 17 | 42168713  | 42168713  | + | G | G |
| 6  | 29644952  | 29644952  | + | G | G |
| 13 | 75813874  | 75813874  | + | C | C |
| X  | 107417754 | 107417754 | + | G | G |
| 19 | 46891872  | 46891872  | + | C | C |
| 5  | 99715311  | 99715311  | + | G | G |
| 17 | 55950136  | 55950136  | + | C | C |
| X  | 13337960  | 13337960  | + | C | C |
| 17 | 73621621  | 73621621  | + | C | C |
| 18 | 25593658  | 25593658  | + | C | C |
| 2  | 179577981 | 179577981 | + | G | G |
| 6  | 43226804  | 43226804  | + | G | G |
| 14 | 53177844  | 53177844  | + | G | G |
| 6  | 55378900  | 55378900  | + | C | C |
| 8  | 17823617  | 17823617  | + | G | G |
| 7  | 116399472 | 116399472 | + | G | G |
| 5  | 161112796 | 161112796 | + | G | G |
| 7  | 142638490 | 142638490 | + | C | C |
| 1  | 197886988 | 197886988 | + | C | C |

|            |           |           |   |   |   |
|------------|-----------|-----------|---|---|---|
| 6          | 30918592  | 30918592  | + | G | G |
| 6          | 74124385  | 74124385  | + | G | G |
| 15         | 102298022 | 102298022 | + | G | G |
| 7          | 140390595 | 140390595 | + | G | G |
| 2          | 179537156 | 179537156 | + | C | C |
| 11         | 63439210  | 63439210  | + | G | G |
| 13         | 36245248  | 36245248  | + | C | C |
| 6          | 29759429  | 29759429  | + | A | A |
| 22         | 26247481  | 26247481  | + | C | C |
| GL000192.1 | 160177    | 160177    | + | C | C |
| 19         | 7591682   | 7591682   | + | T | T |
| 17         | 18574939  | 18574939  | + | C | C |
| 19         | 38380799  | 38380799  | + | T | T |
| 1          | 1111505   | 1111505   | + | G | G |
| 2          | 113984777 | 113984777 | + | C | C |
| 16         | 3296540   | 3296540   | + | C | C |
| 11         | 46342403  | 46342403  | + | T | T |
| 7          | 117067537 | 117067537 | + | C | C |
| 18         | 56711376  | 56711376  | + | G | G |
| 2          | 113081973 | 113081973 | + | C | C |
| 12         | 58088043  | 58088043  | + | G | G |
| 22         | 36006984  | 36006984  | + | G | G |
| 18         | 5428365   | 5428365   | + | G | G |
| 20         | 2779158   | 2779158   | + | G | G |
| 2          | 99992902  | 99992902  | + | G | G |
| 7          | 82545630  | 82545630  | + | G | G |
| 7          | 144059796 | 144059796 | + | C | C |
| 22         | 45810238  | 45810238  | + | C | C |
| 2          | 97595005  | 97595005  | + | G | G |
| 11         | 65822669  | 65822669  | + | G | G |
| 12         | 18716344  | 18716344  | + | G | G |
| 3          | 38357827  | 38357827  | + | G | G |
| 3          | 99569081  | 99569081  | + | T | T |
| 16         | 84270723  | 84270723  | + | G | G |
| 11         | 111751518 | 111751518 | + | C | C |
| 1          | 1387775   | 1387775   | + | C | C |
| 11         | 120008486 | 120008486 | + | G | G |
| 17         | 39767632  | 39767632  | + | C | C |
| 15         | 93588771  | 93588771  | + | C | C |
| 8          | 70539479  | 70539479  | + | G | G |
| 18         | 13387628  | 13387628  | + | G | G |
| 7          | 87046830  | 87046830  | + | G | G |
| 8          | 139809082 | 139809082 | + | G | G |

|    |           |           |   |   |   |
|----|-----------|-----------|---|---|---|
| X  | 70586159  | 70586159  | + | C | C |
| 7  | 137237142 | 137237142 | + | C | C |
| 4  | 36230394  | 36230394  | + | C | C |
| X  | 117526999 | 117526999 | + | C | C |
| 17 | 18024328  | 18024328  | + | C | C |
| 22 | 50695550  | 50695550  | + | C | C |
| 15 | 22382807  | 22382807  | + | G | G |
| 8  | 53050000  | 53050000  | + | T | T |
| 12 | 53400231  | 53400231  | + | C | C |
| 11 | 22770718  | 22770718  | + | G | G |
| 6  | 31938516  | 31938516  | + | G | G |
| 11 | 60638693  | 60638693  | + | G | G |
| 2  | 233274486 | 233274486 | + | C | C |
| 18 | 29487520  | 29487520  | + | A | A |
| 11 | 5142296   | 5142296   | + | C | C |
| 12 | 110977699 | 110977699 | + | G | G |
| 5  | 41475798  | 41475798  | + | C | C |
| 16 | 815203    | 815203    | + | G | G |
| 11 | 34514861  | 34514861  | + | C | C |
| 1  | 225459618 | 225459618 | + | G | G |
| 2  | 179438500 | 179438500 | + | A | A |
| 6  | 32170136  | 32170136  | + | G | G |
| 19 | 1506784   | 1506784   | + | G | G |
| 7  | 56151909  | 56151909  | + | C | C |
| 20 | 39977420  | 39977420  | + | C | C |
| 2  | 1488400   | 1488400   | + | C | C |
| 15 | 84287123  | 84287123  | + | C | C |
| 8  | 35453116  | 35453116  | + | C | C |
| 11 | 111326527 | 111326527 | + | C | C |
| 16 | 2871543   | 2871543   | + | C | C |
| 4  | 7730151   | 7730151   | + | G | G |
| 7  | 38768148  | 38768148  | + | G | G |
| 6  | 6175055   | 6175055   | + | C | C |
| 1  | 45798477  | 45798477  | + | G | G |
| 8  | 113960098 | 113960098 | + | C | C |
| 1  | 227935529 | 227935529 | + | C | C |
| 14 | 92040170  | 92040170  | + | G | G |
| 8  | 53092745  | 53092745  | + | C | C |
| 19 | 36230929  | 36230929  | + | A | A |
| 3  | 164754245 | 164754245 | + | A | A |
| 19 | 1811657   | 1811657   | + | C | C |
| 15 | 31819436  | 31819436  | + | C | C |
| 12 | 53002026  | 53002026  | + | C | C |

|    |           |           |   |   |   |
|----|-----------|-----------|---|---|---|
| X  | 71417325  | 71417325  | + | G | G |
| X  | 20081676  | 20081676  | + | G | G |
| 5  | 140481836 | 140481836 | + | G | G |
| 7  | 99767824  | 99767824  | + | C | C |
| 17 | 36705382  | 36705382  | + | G | G |
| 19 | 47127175  | 47127175  | + | C | C |
| 5  | 11023048  | 11023048  | + | C | C |
| 4  | 44709867  | 44709867  | + | C | C |
| 3  | 46666756  | 46666756  | + | C | C |
| 17 | 10263502  | 10263502  | + | C | C |
| 8  | 53062432  | 53062432  | + | G | G |
| 11 | 115375065 | 115375065 | + | C | C |
| 3  | 132441119 | 132441119 | + | G | G |
| 12 | 101581276 | 101581276 | + | A | A |
| 19 | 43022883  | 43022883  | + | C | C |
| X  | 14627212  | 14627212  | + | C | C |
| 22 | 32590429  | 32590429  | + | C | C |
| 19 | 9090772   | 9090772   | + | G | G |
| X  | 73961073  | 73961073  | + | C | C |
| 11 | 113105885 | 113105885 | + | C | C |
| 19 | 507648    | 507648    | + | C | C |
| 2  | 165365049 | 165365049 | + | C | C |
| 8  | 133090207 | 133090207 | + | C | C |
| 7  | 90419941  | 90419941  | + | G | G |
| 3  | 16216887  | 16216887  | + | G | G |
| 7  | 142478839 | 142478839 | + | C | C |
| 6  | 138584116 | 138584116 | + | G | G |
| 15 | 22962501  | 22962501  | + | C | C |
| 11 | 31115636  | 31115636  | + | C | C |
| X  | 50135416  | 50135416  | + | G | G |
| 7  | 149490537 | 149490537 | + | G | G |
| 17 | 33521050  | 33521050  | + | G | G |
| 2  | 220396526 | 220396526 | + | G | G |
| 11 | 114450978 | 114450978 | + | C | C |
| 11 | 47201018  | 47201018  | + | G | G |
| 19 | 45719399  | 45719399  | + | C | C |
| 7  | 21856244  | 21856244  | + | C | C |
| 1  | 210334977 | 210334977 | + | C | C |
| 16 | 2050043   | 2050043   | + | G | G |
| 8  | 99264764  | 99264764  | + | C | C |
| 3  | 182987954 | 182987954 | + | C | C |
| 22 | 37273674  | 37273674  | + | G | G |
| 8  | 103573097 | 103573097 | + | G | G |

|    |           |           |   |   |   |
|----|-----------|-----------|---|---|---|
| 2  | 188332620 | 188332620 | + | C | C |
| 5  | 43161913  | 43161913  | + | C | C |
| 1  | 207684929 | 207684929 | + | T | T |
| 9  | 38615622  | 38615622  | + | G | G |
| 3  | 137843402 | 137843402 | + | C | C |
| 14 | 34269013  | 34269013  | + | G | G |
| 4  | 69519899  | 69519899  | + | G | G |
| 1  | 170964652 | 170964652 | + | G | G |
| 2  | 56411870  | 56411870  | + | C | C |
| 11 | 7846875   | 7846875   | + | G | G |
| 15 | 91430215  | 91430215  | + | C | C |
| 14 | 94844659  | 94844659  | + | G | G |
| 14 | 22134223  | 22134223  | + | G | G |
| 1  | 237167548 | 237167548 | + | G | G |
| 6  | 3850277   | 3850277   | + | G | G |
| 7  | 142149181 | 142149181 | + | C | C |
| X  | 49074943  | 49074943  | + | G | G |
| 12 | 104390532 | 104390532 | + | T | T |
| 1  | 248202047 | 248202047 | + | G | G |
| 17 | 39680456  | 39680456  | + | A | A |
| 21 | 39426805  | 39426805  | + | G | G |
| 7  | 45124716  | 45124716  | + | C | C |
| 16 | 89556961  | 89556961  | + | G | G |
| 17 | 74004347  | 74004347  | + | G | G |
| 8  | 65711107  | 65711107  | + | G | G |
| 15 | 77317936  | 77317936  | + | G | G |
| 12 | 41900379  | 41900379  | + | G | G |
| 17 | 78055597  | 78055597  | + | G | G |
| 13 | 84453688  | 84453688  | + | C | C |
| 3  | 47618665  | 47618665  | + | T | T |
| 8  | 134061346 | 134061346 | + | G | G |
| 20 | 33117818  | 33117818  | + | C | C |
| 1  | 119964771 | 119964771 | + | A | A |
| 16 | 57181449  | 57181449  | + | C | C |
| 3  | 54919598  | 54919598  | + | G | G |
| 8  | 18541326  | 18541326  | + | C | C |
| 1  | 181767510 | 181767510 | + | C | C |
| 8  | 42188664  | 42188664  | + | C | C |
| 3  | 125208300 | 125208300 | + | G | G |
| 17 | 73257955  | 73257955  | + | C | C |
| 5  | 147486599 | 147486599 | + | G | G |
| 22 | 45243911  | 45243911  | + | C | C |
| 2  | 234106768 | 234106768 | + | C | C |

|            |           |           |   |   |   |
|------------|-----------|-----------|---|---|---|
| 19         | 45021133  | 45021133  | + | C | C |
| GL000211.1 | 107465    | 107465    | + | T | T |
| 11         | 1642986   | 1642986   | + | G | G |
| 11         | 107506466 | 107506466 | + | C | C |
| 11         | 62932099  | 62932099  | + | C | C |
| 17         | 14205198  | 14205198  | + | C | C |
| 6          | 123588894 | 123588894 | + | T | T |
| 2          | 9568933   | 9568933   | + | C | C |
| 9          | 139996447 | 139996447 | + | C | C |
| 16         | 705919    | 705919    | + | C | C |
| 9          | 140786375 | 140786375 | + | G | G |
| 11         | 66358647  | 66358647  | + | G | G |
| 6          | 116442839 | 116442839 | + | G | G |
| 16         | 30080660  | 30080660  | + | C | C |
| 14         | 78392204  | 78392204  | + | G | G |
| 16         | 69481180  | 69481180  | + | C | C |
| 3          | 57401199  | 57401199  | + | G | G |
| 3          | 14563244  | 14563244  | + | G | G |
| 6          | 135375808 | 135375808 | + | G | G |
| 16         | 77325284  | 77325284  | + | C | C |
| 8          | 55538048  | 55538048  | + | G | G |
| 2          | 128408906 | 128408906 | + | G | G |
| 6          | 32549448  | 32549448  | + | C | C |
| 5          | 140503598 | 140503598 | + | C | C |
| 14         | 20389635  | 20389635  | + | G | G |
| 15         | 20588614  | 20588614  | + | C | C |
| 19         | 45719400  | 45719400  | + | A | A |
| 11         | 9771705   | 9771705   | + | T | T |
| 17         | 17124721  | 17124721  | + | C | C |
| 19         | 58084957  | 58084957  | + | G | G |
| 5          | 140166409 | 140166409 | + | C | C |
| 1          | 45799213  | 45799213  | + | C | C |
| 7          | 122028707 | 122028707 | + | C | C |
| 1          | 155168266 | 155168266 | + | C | C |
| 7          | 73153189  | 73153189  | + | C | C |
| 6          | 33235076  | 33235076  | + | G | G |
| 5          | 36039616  | 36039616  | + | C | C |
| 13         | 39263591  | 39263591  | + | G | G |
| 10         | 71665558  | 71665558  | + | C | C |
| 14         | 20666088  | 20666088  | + | C | C |
| 14         | 101198438 | 101198438 | + | G | G |
| 3          | 42956663  | 42956663  | + | G | G |
| 2          | 113089787 | 113089787 | + | A | A |

|    |           |           |   |   |   |
|----|-----------|-----------|---|---|---|
| 5  | 134785503 | 134785503 | + | C | C |
| 7  | 144320298 | 144320298 | + | A | A |
| 16 | 88893230  | 88893230  | + | C | C |
| 5  | 145460606 | 145460606 | + | C | C |
| 11 | 236984    | 236984    | + | C | C |
| 12 | 21998764  | 21998764  | + | C | C |
| 11 | 31159244  | 31159244  | + | C | C |
| 1  | 89732656  | 89732656  | + | G | G |
| 20 | 55949988  | 55949988  | + | C | C |
| 20 | 55949987  | 55949987  | + | C | C |
| 8  | 54163399  | 54163399  | + | A | A |
| 2  | 179582773 | 179582773 | + | G | G |
| 19 | 42928304  | 42928304  | + | G | G |
| 5  | 154200954 | 154200954 | + | T | T |
| 19 | 33486950  | 33486950  | + | C | C |
| 19 | 53086206  | 53086206  | + | C | C |
| 11 | 40137767  | 40137767  | + | G | G |
| 1  | 173952695 | 173952695 | + | C | C |
| 2  | 219755033 | 219755033 | + | A | A |
| 2  | 179577980 | 179577980 | + | G | G |
| 3  | 121341728 | 121341728 | + | G | G |
| 5  | 112157601 | 112157601 | + | C | C |
| 9  | 38395908  | 38395908  | + | C | C |
| 14 | 76548653  | 76548653  | + | C | C |
| 2  | 32828104  | 32828104  | + | G | G |
| 19 | 6312400   | 6312400   | + | G | G |
| 2  | 48718287  | 48718287  | + | C | C |
| 1  | 1858475   | 1858475   | + | G | G |
| 6  | 160183611 | 160183611 | + | C | C |
| 14 | 106725419 | 106725419 | + | C | C |
| 11 | 117163846 | 117163846 | + | C | C |
| 1  | 212550943 | 212550943 | + | C | C |
| 18 | 10787155  | 10787155  | + | G | G |
| 22 | 46931058  | 46931058  | + | G | G |
| 9  | 135984207 | 135984207 | + | C | C |
| 15 | 99500506  | 99500506  | + | C | C |
| 11 | 62933570  | 62933570  | + | G | G |
| 8  | 23423890  | 23423890  | + | C | C |
| 1  | 248525364 | 248525364 | + | C | C |
| 5  | 140744791 | 140744791 | + | G | G |
| 1  | 157803139 | 157803139 | + | G | G |
| 19 | 19338969  | 19338969  | + | G | G |
| 3  | 3178947   | 3178947   | + | T | T |



|    |           |           |   |   |   |
|----|-----------|-----------|---|---|---|
| 17 | 74324816  | 74324816  | + | G | G |
| 2  | 219602832 | 219602832 | + | C | C |
| 16 | 25703963  | 25703963  | + | C | C |
| 16 | 67063332  | 67063332  | + | C | C |
| 7  | 144015560 | 144015560 | + | G | G |
| 3  | 1214982   | 1214982   | + | C | C |
| 7  | 143807370 | 143807370 | + | G | G |
| 17 | 20334236  | 20334236  | + | C | C |
| 11 | 51411609  | 51411609  | + | G | G |
| 1  | 204588050 | 204588050 | + | G | G |
| 16 | 81014408  | 81014408  | + | G | G |
| 20 | 45169826  | 45169826  | + | G | G |
| 12 | 39170101  | 39170101  | + | C | C |
| 3  | 38950500  | 38950500  | + | C | C |
| 17 | 57643104  | 57643104  | + | C | C |
| 16 | 67701561  | 67701561  | + | C | C |
| 7  | 105254706 | 105254706 | + | G | G |
| 5  | 40964923  | 40964923  | + | G | G |
| 7  | 138391406 | 138391406 | + | G | G |
| 9  | 27949342  | 27949342  | + | G | G |
| 19 | 36322588  | 36322588  | + | G | G |
| 2  | 15698730  | 15698730  | + | G | G |
| 4  | 74447924  | 74447924  | + | T | T |
| 19 | 22939519  | 22939519  | + | C | C |
| 18 | 51053012  | 51053012  | + | G | G |
| 7  | 142162012 | 142162012 | + | G | G |
| 22 | 36900807  | 36900807  | + | G | G |
| 18 | 52585220  | 52585220  | + | C | C |
| 19 | 6375751   | 6375751   | + | G | G |
| 1  | 180166081 | 180166081 | + | C | C |
| 15 | 54860033  | 54860033  | + | G | G |
| 22 | 23199204  | 23199204  | + | G | G |
| 14 | 22315304  | 22315304  | + | G | G |
| 15 | 28599990  | 28599990  | + | G | G |
| 2  | 179593060 | 179593060 | + | A | A |
| 5  | 140724414 | 140724414 | + | G | G |
| 7  | 27140318  | 27140318  | + | G | G |
| 6  | 136935303 | 136935303 | + | G | G |
| 3  | 57130471  | 57130471  | + | G | G |
| 9  | 370209    | 370209    | + | C | C |
| 3  | 193176637 | 193176637 | + | G | G |
| 10 | 88421065  | 88421065  | + | G | G |
| 8  | 21827704  | 21827704  | + | C | C |

|    |           |           |   |   |   |
|----|-----------|-----------|---|---|---|
| 3  | 111432778 | 111432778 | + | C | C |
| 3  | 97662279  | 97662279  | + | G | G |
| X  | 153593731 | 153593731 | + | G | G |
| 1  | 149761664 | 149761664 | + | G | G |
| 6  | 137245605 | 137245605 | + | G | G |
| 18 | 12720610  | 12720610  | + | C | C |
| 10 | 45869808  | 45869808  | + | G | G |
| 1  | 209811930 | 209811930 | + | C | C |
| 17 | 8706501   | 8706501   | + | G | G |
| 11 | 5021112   | 5021112   | + | G | G |
| 12 | 113382511 | 113382511 | + | C | C |
| 7  | 142428803 | 142428803 | + | C | C |
| 11 | 18320444  | 18320444  | + | G | G |
| 20 | 17956391  | 17956391  | + | C | C |
| 2  | 138421075 | 138421075 | + | G | G |
| 3  | 102153886 | 102153886 | + | C | C |
| 11 | 75902698  | 75902698  | + | G | G |
| 4  | 111470517 | 111470517 | + | C | C |
| 1  | 1179460   | 1179460   | + | C | C |
| 2  | 219249059 | 219249059 | + | C | C |
| 2  | 31400009  | 31400009  | + | C | C |
| 18 | 43459030  | 43459030  | + | A | A |
| 8  | 27293815  | 27293815  | + | C | C |
| 18 | 56246943  | 56246943  | + | A | A |
| 3  | 24231584  | 24231584  | + | C | C |
| 12 | 91445234  | 91445234  | + | G | G |
| 19 | 1241831   | 1241831   | + | C | C |
| 19 | 35250860  | 35250860  | + | G | G |
| 17 | 16137329  | 16137329  | + | C | C |
| 8  | 144789927 | 144789927 | + | C | C |
| 1  | 165697289 | 165697289 | + | G | G |
| 12 | 119631646 | 119631646 | + | G | G |
| 20 | 62338484  | 62338484  | + | A | A |
| 8  | 144641680 | 144641680 | + | C | C |
| 9  | 5549574   | 5549574   | + | G | G |
| 4  | 46066470  | 46066470  | + | C | C |
| 17 | 19643719  | 19643719  | + | C | C |
| 5  | 13923431  | 13923431  | + | C | C |
| 11 | 67202586  | 67202586  | + | T | T |
| 5  | 90111463  | 90111463  | + | G | G |
| 11 | 4470635   | 4470635   | + | G | G |
| 3  | 38770223  | 38770223  | + | C | C |
| 19 | 4175703   | 4175703   | + | G | G |

|    |           |           |   |   |   |
|----|-----------|-----------|---|---|---|
| 17 | 7984703   | 7984703   | + | C | C |
| 8  | 28928156  | 28928156  | + | C | C |
| 13 | 101833610 | 101833610 | + | G | G |
| 5  | 89925174  | 89925174  | + | T | T |
| 5  | 140801608 | 140801608 | + | G | G |
| 11 | 1036630   | 1036630   | + | G | G |
| 7  | 122788532 | 122788532 | + | G | G |
| 2  | 186672117 | 186672117 | + | A | A |
| 9  | 33385600  | 33385600  | + | G | G |
| 11 | 129940523 | 129940523 | + | G | G |
| 18 | 46783409  | 46783409  | + | G | G |
| 3  | 189038426 | 189038426 | + | C | C |
| 2  | 37484067  | 37484067  | + | C | C |
| 5  | 149669141 | 149669141 | + | G | G |
| 7  | 142458853 | 142458853 | + | T | T |
| 6  | 31614289  | 31614289  | + | G | G |
| MT | 15153     | 15153     | + | G | G |
| 11 | 34156826  | 34156826  | + | C | C |
| 4  | 79432610  | 79432610  | + | C | C |
| 6  | 159660932 | 159660932 | + | G | G |
| 3  | 133191344 | 133191344 | + | C | C |
| 1  | 248487554 | 248487554 | + | G | G |
| 6  | 132859504 | 132859504 | + | C | C |
| 11 | 609668    | 609668    | + | C | C |
| 17 | 37009329  | 37009329  | + | G | G |
| 21 | 45826633  | 45826633  | + | C | C |
| 12 | 57114410  | 57114410  | + | G | G |
| 1  | 202794809 | 202794809 | + | G | G |
| 7  | 1914110   | 1914110   | + | G | G |
| 1  | 228645419 | 228645419 | + | A | A |
| 13 | 103514431 | 103514431 | + | C | C |
| 19 | 7571318   | 7571318   | + | C | C |
| 19 | 10132057  | 10132057  | + | C | C |
| 3  | 78711259  | 78711259  | + | G | G |
| 8  | 139158223 | 139158223 | + | G | G |
| 7  | 50737468  | 50737468  | + | G | G |
| 6  | 74117320  | 74117320  | + | C | C |
| 19 | 9065041   | 9065041   | + | C | C |
| 6  | 42655973  | 42655973  | + | G | G |
| 14 | 60193790  | 60193790  | + | G | G |
| 19 | 11891613  | 11891613  | + | G | G |
| 7  | 157369393 | 157369393 | + | C | C |
| 1  | 161011138 | 161011138 | + | G | G |

|    |           |           |   |   |   |
|----|-----------|-----------|---|---|---|
| 9  | 101777744 | 101777744 | + | G | G |
| 8  | 145167453 | 145167453 | + | C | C |
| 20 | 33539534  | 33539534  | + | G | G |
| 11 | 92533806  | 92533806  | + | C | C |
| 7  | 82072889  | 82072889  | + | G | G |
| 10 | 75231330  | 75231330  | + | C | C |
| 4  | 57843752  | 57843752  | + | G | G |
| 9  | 116186536 | 116186536 | + | C | C |
| 12 | 129694157 | 129694157 | + | G | G |
| 4  | 174292614 | 174292614 | + | C | C |
| 2  | 132200366 | 132200366 | + | T | T |
| 2  | 233348840 | 233348840 | + | C | C |
| 3  | 33194245  | 33194245  | + | C | C |
| 14 | 24898011  | 24898011  | + | G | G |
| 16 | 20548594  | 20548594  | + | C | C |
| 1  | 151787762 | 151787762 | + | G | G |
| 2  | 102818025 | 102818025 | + | G | G |
| 5  | 68927788  | 68927788  | + | G | G |
| 14 | 74973893  | 74973893  | + | C | C |
| 5  | 140348081 | 140348081 | + | C | C |
| 12 | 7520698   | 7520698   | + | G | G |
| 11 | 67261206  | 67261206  | + | G | G |
| 14 | 24780533  | 24780533  | + | G | G |
| 17 | 48653535  | 48653535  | + | C | C |
| 22 | 39621800  | 39621800  | + | G | G |
| 8  | 143957506 | 143957506 | + | A | A |
| 13 | 25507351  | 25507351  | + | G | G |
| 4  | 995553    | 995553    | + | C | C |
| 1  | 154961117 | 154961117 | + | C | C |
| 15 | 99827461  | 99827461  | + | G | G |
| 10 | 22048133  | 22048133  | + | T | T |
| 4  | 109810876 | 109810876 | + | G | G |
| 15 | 69718726  | 69718726  | + | G | G |
| 17 | 4624438   | 4624438   | + | C | C |
| 16 | 2816329   | 2816329   | + | C | C |
| 1  | 27428903  | 27428903  | + | G | G |
| 17 | 617983    | 617983    | + | G | G |
| 16 | 9023367   | 9023367   | + | A | A |
| 4  | 52943037  | 52943037  | + | G | G |
| 1  | 159038357 | 159038357 | + | C | C |
| 9  | 82334978  | 82334978  | + | C | C |
| 6  | 54095676  | 54095676  | + | G | G |
| 1  | 237754183 | 237754183 | + | C | C |

|    |           |           |   |   |   |
|----|-----------|-----------|---|---|---|
| 19 | 35757272  | 35757272  | + | C | C |
| 13 | 97485423  | 97485423  | + | G | G |
| 20 | 18794672  | 18794672  | + | G | G |
| 7  | 74470151  | 74470151  | + | C | C |
| 14 | 23886110  | 23886110  | + | C | C |
| 15 | 91527335  | 91527335  | + | G | G |
| 7  | 87912042  | 87912042  | + | A | A |
| 6  | 54173485  | 54173485  | + | G | G |
| 2  | 189910572 | 189910572 | + | G | G |
| 19 | 54647467  | 54647467  | + | C | C |
| 1  | 144867962 | 144867962 | + | G | G |
| 7  | 148526883 | 148526883 | + | G | G |
| 5  | 76624876  | 76624876  | + | C | C |
| 3  | 150416608 | 150416608 | + | G | G |
| 5  | 13885318  | 13885318  | + | A | A |
| 7  | 149492413 | 149492413 | + | G | G |
| 15 | 26861149  | 26861149  | + | G | G |
| 1  | 152785137 | 152785137 | + | G | G |
| 9  | 133932469 | 133932469 | + | G | G |
| 1  | 145109585 | 145109585 | + | T | T |
| 19 | 50944242  | 50944242  | + | C | C |
| 20 | 1276971   | 1276971   | + | C | C |
| 19 | 14519969  | 14519969  | + | T | T |
| 19 | 49119934  | 49119934  | + | C | C |
| 8  | 52320940  | 52320940  | + | G | G |
| 19 | 43772058  | 43772058  | + | G | G |
| 19 | 10415763  | 10415763  | + | G | G |
| 22 | 50752278  | 50752278  | + | G | G |
| 1  | 33583581  | 33583581  | + | G | G |
| 16 | 67701563  | 67701563  | + | C | C |
| 12 | 100041883 | 100041883 | + | G | G |
| 1  | 23191674  | 23191674  | + | C | C |
| 19 | 36360574  | 36360574  | + | G | G |
| 6  | 169634989 | 169634989 | + | C | C |
| 9  | 33442166  | 33442166  | + | G | G |
| 14 | 36147138  | 36147138  | + | C | C |
| 20 | 2778907   | 2778907   | + | C | C |
| 12 | 72863575  | 72863575  | + | G | G |
| 3  | 191093238 | 191093238 | + | C | C |
| 17 | 26864446  | 26864446  | + | C | C |
| 3  | 97868692  | 97868692  | + | C | C |
| 19 | 46195232  | 46195232  | + | G | G |
| 11 | 124095433 | 124095433 | + | G | G |

|    |           |           |   |   |   |
|----|-----------|-----------|---|---|---|
| 17 | 10438389  | 10438389  | + | C | C |
| 11 | 119252191 | 119252191 | + | T | T |
| 19 | 10439552  | 10439552  | + | G | G |
| 10 | 124457257 | 124457257 | + | G | G |
| 19 | 49990621  | 49990621  | + | C | C |
| 12 | 54379475  | 54379475  | + | C | C |
| 22 | 18273401  | 18273401  | + | G | G |
| 6  | 1102502   | 1102502   | + | C | C |
| 8  | 41399418  | 41399418  | + | G | G |
| 19 | 51919518  | 51919518  | + | C | C |
| 13 | 50062761  | 50062761  | + | C | C |
| 19 | 9362488   | 9362488   | + | T | T |
| 2  | 10977656  | 10977656  | + | C | C |
| 13 | 114782828 | 114782828 | + | C | C |
| 2  | 26541948  | 26541948  | + | G | G |
| 16 | 30001082  | 30001082  | + | G | G |
| 10 | 102684487 | 102684487 | + | C | C |
| 6  | 130763021 | 130763021 | + | G | G |
| 6  | 149777933 | 149777933 | + | G | G |
| 9  | 130692091 | 130692091 | + | C | C |
| 6  | 33256237  | 33256237  | + | G | G |
| 19 | 55179098  | 55179098  | + | G | G |
| 12 | 101505426 | 101505426 | + | C | C |
| 20 | 2384049   | 2384049   | + | C | C |
| 19 | 38912705  | 38912705  | + | C | C |
| 3  | 97852004  | 97852004  | + | C | C |
| 6  | 73935080  | 73935080  | + | C | C |
| 1  | 236894532 | 236894532 | + | G | G |
| 2  | 232263261 | 232263261 | + | G | G |
| 15 | 31233472  | 31233472  | + | G | G |
| 16 | 20681230  | 20681230  | + | C | C |
| 1  | 204499915 | 204499915 | + | G | G |
| 2  | 1637864   | 1637864   | + | G | G |
| 15 | 41853785  | 41853785  | + | G | G |
| 19 | 6751311   | 6751311   | + | C | C |
| 3  | 44492379  | 44492379  | + | G | G |
| 8  | 131073044 | 131073044 | + | G | G |
| 1  | 207785052 | 207785052 | + | G | G |
| 8  | 17579495  | 17579495  | + | G | G |
| 7  | 127253883 | 127253883 | + | C | C |
| 5  | 41051147  | 41051147  | + | C | C |
| 19 | 54849677  | 54849677  | + | C | C |
| 16 | 4408249   | 4408249   | + | G | G |

|    |           |           |   |   |   |
|----|-----------|-----------|---|---|---|
| 1  | 55307672  | 55307672  | + | G | G |
| 6  | 155054998 | 155054998 | + | C | C |
| 19 | 9086339   | 9086339   | + | C | C |
| 12 | 8244403   | 8244403   | + | G | G |
| 19 | 49002705  | 49002705  | + | G | G |
| 18 | 3102538   | 3102538   | + | G | G |
| 16 | 67244563  | 67244563  | + | C | C |
| 1  | 222892633 | 222892633 | + | C | C |
| 20 | 9495404   | 9495404   | + | C | C |
| 6  | 7888981   | 7888981   | + | G | G |
| 5  | 140731337 | 140731337 | + | A | A |
| 17 | 1985251   | 1985251   | + | C | C |
| 5  | 122343449 | 122343449 | + | C | C |
| 22 | 22020299  | 22020299  | + | G | G |
| 17 | 77924227  | 77924227  | + | C | C |
| 17 | 10363547  | 10363547  | + | G | G |
| 11 | 114550411 | 114550411 | + | G | G |
| 7  | 21828928  | 21828928  | + | G | G |
| 4  | 174292615 | 174292615 | + | C | C |
| 20 | 29960817  | 29960817  | + | C | C |
| 8  | 97345784  | 97345784  | + | G | G |
| 17 | 41242986  | 41242986  | + | G | G |
| 1  | 214818221 | 214818221 | + | C | C |
| 19 | 3474973   | 3474973   | + | T | T |
| 22 | 51195730  | 51195730  | + | G | G |
| 7  | 99933593  | 99933593  | + | C | C |
| 1  | 226426714 | 226426714 | + | G | G |
| X  | 101095994 | 101095994 | + | G | G |
| 7  | 151845745 | 151845745 | + | C | C |
| 4  | 151114356 | 151114356 | + | C | C |
| X  | 73812348  | 73812348  | + | G | G |
| 8  | 53062431  | 53062431  | + | G | G |
| 15 | 84159588  | 84159588  | + | G | G |
| 5  | 141038027 | 141038027 | + | G | G |
| 8  | 41164359  | 41164359  | + | G | G |
| 11 | 72119155  | 72119155  | + | C | C |
| 2  | 158182194 | 158182194 | + | G | G |
| 3  | 50138040  | 50138040  | + | T | T |
| 13 | 45768448  | 45768448  | + | G | G |
| 6  | 53378926  | 53378926  | + | A | A |
| 15 | 22383148  | 22383148  | + | C | C |
| 17 | 48653536  | 48653536  | + | C | C |
| 2  | 231150546 | 231150546 | + | G | G |

|            |           |           |   |   |   |
|------------|-----------|-----------|---|---|---|
| 15         | 65489644  | 65489644  | + | G | G |
| 11         | 76918264  | 76918264  | + | C | C |
| 20         | 368776    | 368776    | + | C | C |
| GL000205.1 | 118163    | 118163    | + | G | G |
| 11         | 123894145 | 123894145 | + | C | C |
| 19         | 56952878  | 56952878  | + | C | C |
| 11         | 92088512  | 92088512  | + | C | C |
| 9          | 100071807 | 100071807 | + | G | G |
| 7          | 45796527  | 45796527  | + | A | A |
| 19         | 5831341   | 5831341   | + | C | C |
| 11         | 56757090  | 56757090  | + | G | G |
| 1          | 57373766  | 57373766  | + | C | C |
| MT         | 9753      | 9753      | + | G | G |
| 16         | 70400722  | 70400722  | + | C | C |
| 17         | 2901645   | 2901645   | + | C | C |
| 3          | 52555801  | 52555801  | + | G | G |
| 1          | 40431546  | 40431546  | + | C | C |
| 16         | 29791801  | 29791801  | + | C | C |
| 19         | 49552101  | 49552101  | + | A | A |
| 17         | 7592642   | 7592642   | + | T | T |
| 21         | 30250566  | 30250566  | + | G | G |
| X          | 3229472   | 3229472   | + | C | C |
| 2          | 211521299 | 211521299 | + | G | G |
| 20         | 31873993  | 31873993  | + | A | A |
| X          | 129045801 | 129045801 | + | C | C |
| 12         | 109849747 | 109849747 | + | G | G |
| 13         | 23808801  | 23808801  | + | G | G |
| 11         | 75902697  | 75902697  | + | A | A |
| 1          | 35223660  | 35223660  | + | C | C |
| 1          | 170699423 | 170699423 | + | C | C |
| 6          | 29910672  | 29910672  | + | C | C |
| 19         | 43763053  | 43763053  | + | C | C |
| 20         | 33539533  | 33539533  | + | G | G |
| 19         | 51480937  | 51480937  | + | C | C |
| 6          | 42929527  | 42929527  | + | G | G |
| 12         | 98926673  | 98926673  | + | C | C |
| 11         | 61641212  | 61641212  | + | G | G |
| 19         | 41289698  | 41289698  | + | T | T |
| 4          | 100203392 | 100203392 | + | T | T |
| X          | 135432556 | 135432556 | + | G | G |
| X          | 110964861 | 110964861 | + | C | C |
| 16         | 31580160  | 31580160  | + | G | G |
| 9          | 104433278 | 104433278 | + | G | G |



|            |           |           |   |   |   |
|------------|-----------|-----------|---|---|---|
| 19         | 44892090  | 44892090  | + | G | G |
| 12         | 7254599   | 7254599   | + | C | C |
| 20         | 44638532  | 44638532  | + | C | C |
| 7          | 64439496  | 64439496  | + | G | G |
| GL000218.1 | 53646     | 53646     | + | T | T |
| 1          | 200882852 | 200882852 | + | C | C |
| 10         | 115337888 | 115337888 | + | G | G |
| 19         | 39663700  | 39663700  | + | G | G |
| 1          | 45797357  | 45797357  | + | G | G |
| 5          | 150276521 | 150276521 | + | G | G |
| 2          | 128522210 | 128522210 | + | G | G |
| 7          | 74470152  | 74470152  | + | C | C |
| 8          | 110655206 | 110655206 | + | C | C |
| 15         | 43819075  | 43819075  | + | C | C |
| 17         | 76113689  | 76113689  | + | G | G |
| 1          | 158299250 | 158299250 | + | T | T |
| X          | 49103348  | 49103348  | + | T | T |
| 17         | 12569370  | 12569370  | + | C | C |
| 11         | 32122135  | 32122135  | + | G | G |
| 18         | 18549089  | 18549089  | + | C | C |
| 19         | 3759890   | 3759890   | + | G | G |
| 6          | 41250460  | 41250460  | + | C | C |
| 11         | 130281380 | 130281380 | + | C | C |
| 3          | 64536449  | 64536449  | + | G | G |
| 13         | 100617662 | 100617662 | + | C | C |
| 2          | 227771502 | 227771502 | + | C | C |
| 19         | 56321356  | 56321356  | + | C | C |
| 8          | 27145540  | 27145540  | + | C | C |
| 6          | 28059057  | 28059057  | + | G | G |
| 3          | 30032753  | 30032753  | + | C | C |
| 2          | 166850791 | 166850791 | + | A | A |
| 1          | 201757623 | 201757623 | + | G | G |
| 16         | 29828027  | 29828027  | + | G | G |
| 7          | 41729997  | 41729997  | + | G | G |
| 16         | 67428626  | 67428626  | + | C | C |
| 11         | 120200925 | 120200925 | + | C | C |
| 7          | 45112476  | 45112476  | + | C | C |
| 19         | 58598359  | 58598359  | + | G | G |
| 3          | 108677964 | 108677964 | + | C | C |
| 20         | 5903839   | 5903839   | + | G | G |
| 15         | 34610841  | 34610841  | + | C | C |
| 6          | 33693245  | 33693245  | + | G | G |
| X          | 135427059 | 135427059 | + | G | G |

|    |           |           |   |   |   |
|----|-----------|-----------|---|---|---|
| 1  | 199996886 | 199996886 | + | C | C |
| 19 | 12359015  | 12359015  | + | G | G |
| 2  | 165994457 | 165994457 | + | G | G |
| 14 | 38152115  | 38152115  | + | G | G |
| 9  | 14805118  | 14805118  | + | G | G |
| X  | 153229672 | 153229672 | + | G | G |
| 6  | 138601138 | 138601138 | + | G | G |
| 2  | 163250965 | 163250965 | + | C | C |
| 3  | 11383609  | 11383609  | + | G | G |
| 17 | 6377770   | 6377770   | + | C | C |
| 6  | 43230915  | 43230915  | + | G | G |
| 1  | 200978519 | 200978519 | + | C | C |
| 11 | 119145661 | 119145661 | + | C | C |
| 19 | 39101933  | 39101933  | + | G | G |
| 20 | 23420822  | 23420822  | + | G | G |
| 16 | 2369687   | 2369687   | + | G | G |
| 10 | 96535151  | 96535151  | + | C | C |
| 15 | 34647992  | 34647992  | + | C | C |
| 8  | 105503593 | 105503593 | + | G | G |
| 19 | 18369281  | 18369281  | + | G | G |
| 11 | 130281381 | 130281381 | + | C | C |
| 6  | 136597576 | 136597576 | + | C | C |
| X  | 70145924  | 70145924  | + | C | C |
| 11 | 17352494  | 17352494  | + | C | C |
| 12 | 104170259 | 104170259 | + | G | G |
| 5  | 140181469 | 140181469 | + | G | G |
| 14 | 87387969  | 87387969  | + | C | C |
| 10 | 76732344  | 76732344  | + | A | A |
| 17 | 10299903  | 10299903  | + | C | C |
| 16 | 61891091  | 61891091  | + | C | C |
| 16 | 67473007  | 67473007  | + | A | A |
| 13 | 29600965  | 29600965  | + | T | T |
| 3  | 123047562 | 123047562 | + | C | C |
| 1  | 74905180  | 74905180  | + | C | C |
| 17 | 48828139  | 48828139  | + | A | A |
| 4  | 16024982  | 16024982  | + | G | G |
| 19 | 47127176  | 47127176  | + | C | C |
| 17 | 44952677  | 44952677  | + | G | G |
| 19 | 17838066  | 17838066  | + | G | G |
| 14 | 69951580  | 69951580  | + | C | C |
| 3  | 195956828 | 195956828 | + | G | G |
| 5  | 110835658 | 110835658 | + | G | G |
| 5  | 34190493  | 34190493  | + | G | G |

|    |           |           |   |   |   |
|----|-----------|-----------|---|---|---|
| 6  | 28554272  | 28554272  | + | C | C |
| 7  | 31378319  | 31378319  | + | G | G |
| 19 | 7006067   | 7006067   | + | G | G |
| 5  | 131298359 | 131298359 | + | T | T |
| 3  | 141291480 | 141291480 | + | C | C |
| 14 | 102026707 | 102026707 | + | C | C |
| 12 | 110252338 | 110252338 | + | G | G |
| 13 | 75923335  | 75923335  | + | G | G |
| X  | 111874620 | 111874620 | + | C | C |
| 7  | 55755625  | 55755625  | + | G | G |
| 9  | 96021276  | 96021276  | + | G | G |
| 16 | 20802238  | 20802238  | + | G | G |
| 6  | 109190172 | 109190172 | + | C | C |
| 7  | 141429368 | 141429368 | + | G | G |
| 16 | 15835697  | 15835697  | + | C | C |
| 19 | 41112320  | 41112320  | + | G | G |
| 17 | 37322164  | 37322164  | + | G | G |
| 5  | 161324542 | 161324542 | + | C | C |
| 13 | 41703952  | 41703952  | + | T | T |
| 3  | 53322213  | 53322213  | + | C | C |
| 8  | 22172583  | 22172583  | + | G | G |
| 14 | 39818037  | 39818037  | + | C | C |
| X  | 51644866  | 51644866  | + | C | C |
| 14 | 90650730  | 90650730  | + | G | G |
| 1  | 153655046 | 153655046 | + | C | C |
| 12 | 55420486  | 55420486  | + | G | G |
| 17 | 618083    | 618083    | + | C | C |
| 11 | 47182769  | 47182769  | + | C | C |
| 17 | 11543667  | 11543667  | + | G | G |
| 16 | 29708320  | 29708320  | + | G | G |
| 19 | 10794959  | 10794959  | + | C | C |
| 17 | 39580610  | 39580610  | + | G | G |
| 5  | 83356160  | 83356160  | + | C | C |
| 14 | 74876084  | 74876084  | + | A | A |
| 5  | 146722794 | 146722794 | + | C | C |
| 7  | 138764634 | 138764634 | + | G | G |
| 14 | 94750376  | 94750376  | + | G | G |
| 19 | 12155097  | 12155097  | + | C | C |
| 9  | 8465582   | 8465582   | + | G | G |
| 12 | 2936398   | 2936398   | + | G | G |
| 8  | 124658110 | 124658110 | + | C | C |
| 1  | 203698802 | 203698802 | + | C | C |
| 11 | 122889124 | 122889124 | + | G | G |

|    |           |           |   |   |   |
|----|-----------|-----------|---|---|---|
| 16 | 71012891  | 71012891  | + | C | C |
| 22 | 42526834  | 42526834  | + | G | G |
| 1  | 225525768 | 225525768 | + | C | C |
| 6  | 116756779 | 116756779 | + | C | C |
| 1  | 17298895  | 17298895  | + | G | G |
| 20 | 41101036  | 41101036  | + | G | G |
| 1  | 152326001 | 152326001 | + | C | C |
| 2  | 237032855 | 237032855 | + | C | C |
| 5  | 40937743  | 40937743  | + | G | G |
| 11 | 77475712  | 77475712  | + | G | G |
| 6  | 134350330 | 134350330 | + | T | T |
| 16 | 88893167  | 88893167  | + | C | C |
| 1  | 160248453 | 160248453 | + | C | C |
| 6  | 41752737  | 41752737  | + | G | G |
| 19 | 36207573  | 36207573  | + | C | C |
| 16 | 68055729  | 68055729  | + | C | C |
| 6  | 3263949   | 3263949   | + | G | G |
| 5  | 989853    | 989853    | + | C | C |
| 14 | 92347693  | 92347693  | + | C | C |
| 5  | 140348695 | 140348695 | + | C | C |
| 22 | 50591587  | 50591587  | + | C | C |
| 19 | 36545786  | 36545786  | + | C | C |
| 3  | 62153662  | 62153662  | + | C | C |
| 8  | 39495126  | 39495126  | + | C | C |
| 9  | 116812240 | 116812240 | + | C | C |
| 20 | 61978036  | 61978036  | + | G | G |
| 1  | 158261890 | 158261890 | + | G | G |
| 6  | 116442909 | 116442909 | + | C | C |
| 3  | 52282524  | 52282524  | + | C | C |
| 11 | 64323603  | 64323603  | + | C | C |
| 12 | 121434343 | 121434343 | + | G | G |
| 18 | 47428994  | 47428994  | + | C | C |
| 3  | 47277605  | 47277605  | + | G | G |
| 19 | 49131786  | 49131786  | + | C | C |
| 20 | 43930015  | 43930015  | + | A | A |
| 6  | 134349733 | 134349733 | + | C | C |
| 3  | 108149693 | 108149693 | + | C | C |
| 4  | 155411438 | 155411438 | + | G | G |
| 1  | 120493056 | 120493056 | + | G | G |
| 1  | 16577664  | 16577664  | + | G | G |
| 14 | 24511949  | 24511949  | + | C | C |
| 10 | 134974026 | 134974026 | + | C | C |
| 11 | 6897914   | 6897914   | + | T | T |

|    |           |           |   |   |   |
|----|-----------|-----------|---|---|---|
| 19 | 44590849  | 44590849  | + | G | G |
| 20 | 43850823  | 43850823  | + | G | G |
| 5  | 64595854  | 64595854  | + | G | G |
| 1  | 156390175 | 156390175 | + | C | C |
| 7  | 44608767  | 44608767  | + | G | G |
| 14 | 51706962  | 51706962  | + | G | G |
| 1  | 119936435 | 119936435 | + | G | G |
| 12 | 123340809 | 123340809 | + | C | C |
| 19 | 30206206  | 30206206  | + | C | C |
| 6  | 82935361  | 82935361  | + | G | G |
| 3  | 11382201  | 11382201  | + | C | C |
| 19 | 1785180   | 1785180   | + | G | G |
| 1  | 32936449  | 32936449  | + | C | C |
| 1  | 248112255 | 248112255 | + | C | C |
| 2  | 48718288  | 48718288  | + | C | C |
| 1  | 232144798 | 232144798 | + | C | C |
| 6  | 109321763 | 109321763 | + | T | T |
| 17 | 39535891  | 39535891  | + | C | C |
| 2  | 128394712 | 128394712 | + | G | G |
| 7  | 54636790  | 54636790  | + | G | G |
| 6  | 83905580  | 83905580  | + | C | C |
| 7  | 150034523 | 150034523 | + | C | C |
| 6  | 75843627  | 75843627  | + | G | G |
| 3  | 122269482 | 122269482 | + | G | G |
| 1  | 92979166  | 92979166  | + | G | G |
| X  | 71360419  | 71360419  | + | A | A |
| 15 | 101970199 | 101970199 | + | C | C |
| 21 | 47410315  | 47410315  | + | C | C |
| 14 | 23890258  | 23890258  | + | C | C |
| 9  | 111625869 | 111625869 | + | G | G |
| 1  | 227174529 | 227174529 | + | T | T |
| 17 | 76113690  | 76113690  | + | G | G |
| 4  | 156618197 | 156618197 | + | C | C |
| 5  | 140737289 | 140737289 | + | C | C |
| 22 | 46787695  | 46787695  | + | G | G |
| 22 | 44342200  | 44342200  | + | G | G |
| 7  | 36662832  | 36662832  | + | G | G |
| 14 | 50895426  | 50895426  | + | C | C |
| 20 | 25755908  | 25755908  | + | C | C |
| 14 | 21990162  | 21990162  | + | G | G |
| 19 | 30935025  | 30935025  | + | G | G |
| 1  | 158152245 | 158152245 | + | C | C |
| 16 | 24580077  | 24580077  | + | C | C |

|    |           |           |   |   |   |
|----|-----------|-----------|---|---|---|
| 19 | 9296508   | 9296508   | + | C | C |
| 11 | 59861119  | 59861119  | + | C | C |
| 15 | 23889121  | 23889121  | + | G | G |
| X  | 152736293 | 152736293 | + | G | G |
| 1  | 76260335  | 76260335  | + | G | G |
| 12 | 112241771 | 112241771 | + | G | G |
| 15 | 25331759  | 25331759  | + | G | G |
| 19 | 48887599  | 48887599  | + | G | G |
| 1  | 183938500 | 183938500 | + | C | C |
| 19 | 3961598   | 3961598   | + | C | C |
| 19 | 54965611  | 54965611  | + | C | C |
| 13 | 102375225 | 102375225 | + | T | T |
| 22 | 41626275  | 41626275  | + | G | G |
| 7  | 120387884 | 120387884 | + | G | G |
| 1  | 204167525 | 204167525 | + | C | C |
| 7  | 150761400 | 150761400 | + | G | G |
| 10 | 123954585 | 123954585 | + | C | C |
| 1  | 4847712   | 4847712   | + | C | C |
| 6  | 152697437 | 152697437 | + | G | G |
| 19 | 19049624  | 19049624  | + | G | G |
| 11 | 66193595  | 66193595  | + | G | G |
| 4  | 168155395 | 168155395 | + | G | G |
| 7  | 64313721  | 64313721  | + | C | C |
| 12 | 106824111 | 106824111 | + | C | C |
| 13 | 113729440 | 113729440 | + | G | G |
| 7  | 155595565 | 155595565 | + | T | T |
| 12 | 75881539  | 75881539  | + | G | G |
| 14 | 33015359  | 33015359  | + | G | G |
| 6  | 7231347   | 7231347   | + | A | A |
| 19 | 12204659  | 12204659  | + | G | G |
| 8  | 41399419  | 41399419  | + | G | G |
| 6  | 152779891 | 152779891 | + | C | C |
| 17 | 7192103   | 7192103   | + | G | G |
| 16 | 614077    | 614077    | + | C | C |
| 1  | 158746909 | 158746909 | + | C | C |
| 19 | 43965675  | 43965675  | + | C | C |
| 13 | 115028421 | 115028421 | + | T | T |
| 18 | 28710672  | 28710672  | + | C | C |
| 21 | 47571866  | 47571866  | + | C | C |
| 10 | 5684463   | 5684463   | + | G | G |
| 8  | 52730220  | 52730220  | + | C | C |
| 17 | 79205559  | 79205559  | + | G | G |
| 4  | 2306914   | 2306914   | + | G | G |

|    |           |           |   |   |   |
|----|-----------|-----------|---|---|---|
| 1  | 153800629 | 153800629 | + | G | G |
| 5  | 225567    | 225567    | + | G | G |
| 22 | 42120011  | 42120011  | + | G | G |
| 14 | 94395186  | 94395186  | + | C | C |
| 19 | 43421960  | 43421960  | + | T | T |
| 1  | 157504155 | 157504155 | + | G | G |
| 3  | 55984490  | 55984490  | + | C | C |
| 3  | 180680768 | 180680768 | + | A | A |
| 8  | 28928157  | 28928157  | + | C | C |
| 1  | 47653077  | 47653077  | + | C | C |
| 16 | 74761141  | 74761141  | + | C | C |
| 5  | 140559780 | 140559780 | + | C | C |
| X  | 1505435   | 1505435   | + | T | T |
| 22 | 19754090  | 19754090  | + | G | G |
| 6  | 161127489 | 161127489 | + | T | T |
| 8  | 30705529  | 30705529  | + | C | C |
| X  | 149867761 | 149867761 | + | C | C |
| 8  | 33449608  | 33449608  | + | C | C |
| 5  | 167841437 | 167841437 | + | C | C |
| 7  | 45222933  | 45222933  | + | C | C |
| 2  | 61528215  | 61528215  | + | G | G |
| 3  | 10387197  | 10387197  | + | G | G |
| 1  | 243319680 | 243319680 | + | G | G |
| 2  | 152319799 | 152319799 | + | C | C |
| 19 | 11891614  | 11891614  | + | A | A |
| 14 | 63417212  | 63417212  | + | C | C |
| 11 | 9871744   | 9871744   | + | G | G |
| X  | 76829775  | 76829775  | + | G | G |
| 8  | 125025736 | 125025736 | + | G | G |
| 12 | 8023572   | 8023572   | + | G | G |
| X  | 41007774  | 41007774  | + | C | C |
| 5  | 40937742  | 40937742  | + | G | G |
| 11 | 16816460  | 16816460  | + | G | G |
| 20 | 33329948  | 33329948  | + | G | G |
| 11 | 118081281 | 118081281 | + | G | G |
| 6  | 139159527 | 139159527 | + | C | C |
| 19 | 38376614  | 38376614  | + | C | C |
| 7  | 114294164 | 114294164 | + | G | G |
| 1  | 167798653 | 167798653 | + | C | C |
| 17 | 4692256   | 4692256   | + | G | G |
| 9  | 93657813  | 93657813  | + | G | G |
| 17 | 7287919   | 7287919   | + | C | C |
| 22 | 26239782  | 26239782  | + | G | G |

|    |           |           |   |   |   |
|----|-----------|-----------|---|---|---|
| 3  | 49145876  | 49145876  | + | G | G |
| 1  | 248637371 | 248637371 | + | G | G |
| 3  | 108129775 | 108129775 | + | C | C |
| 7  | 117864835 | 117864835 | + | G | G |
| 7  | 115580967 | 115580967 | + | G | G |
| 5  | 180277796 | 180277796 | + | G | G |
| 2  | 18768829  | 18768829  | + | C | C |
| 6  | 134210616 | 134210616 | + | G | G |
| 16 | 10912443  | 10912443  | + | G | G |
| 19 | 8651724   | 8651724   | + | G | G |
| 18 | 9559520   | 9559520   | + | G | G |
| 12 | 124408898 | 124408898 | + | C | C |
| 7  | 102915508 | 102915508 | + | C | C |
| 5  | 35705859  | 35705859  | + | G | G |
| 17 | 26864324  | 26864324  | + | G | G |
| 19 | 55445002  | 55445002  | + | C | C |
| 8  | 97332514  | 97332514  | + | G | G |
| 19 | 44635463  | 44635463  | + | C | C |
| 2  | 11810278  | 11810278  | + | C | C |
| 17 | 7646380   | 7646380   | + | G | G |
| 19 | 49131785  | 49131785  | + | C | C |
| 19 | 50306594  | 50306594  | + | T | T |
| 17 | 4120242   | 4120242   | + | C | C |
| 3  | 124483259 | 124483259 | + | T | T |
| 19 | 45848951  | 45848951  | + | C | C |
| 2  | 231076248 | 231076248 | + | G | G |
| 3  | 97686143  | 97686143  | + | C | C |
| 17 | 62385885  | 62385885  | + | C | C |
| 11 | 56020474  | 56020474  | + | G | G |
| 2  | 18112654  | 18112654  | + | G | G |
| 18 | 39584419  | 39584419  | + | G | G |
| 12 | 117662836 | 117662836 | + | C | C |
| 22 | 20781737  | 20781737  | + | G | G |
| 2  | 152830396 | 152830396 | + | G | G |
| 5  | 54415738  | 54415738  | + | G | G |
| 10 | 129902338 | 129902338 | + | G | G |
| 8  | 72111506  | 72111506  | + | G | G |
| 17 | 7705278   | 7705278   | + | G | G |
| 1  | 143767715 | 143767715 | + | C | C |
| 5  | 31799354  | 31799354  | + | C | C |
| 8  | 61769182  | 61769182  | + | C | C |
| 11 | 117969728 | 117969728 | + | C | C |
| 12 | 63359588  | 63359588  | + | C | C |



|            |           |           |   |   |   |
|------------|-----------|-----------|---|---|---|
| 2          | 191375141 | 191375141 | + | C | C |
| 7          | 35084081  | 35084081  | + | C | C |
| 11         | 8118912   | 8118912   | + | G | G |
| 6          | 31083556  | 31083556  | + | G | G |
| 1          | 248637422 | 248637422 | + | C | C |
| 2          | 71891480  | 71891480  | + | G | G |
| 11         | 45987079  | 45987079  | + | G | G |
| 19         | 2248039   | 2248039   | + | C | C |
| 3          | 48310077  | 48310077  | + | C | C |
| 14         | 23392301  | 23392301  | + | T | T |
| 1          | 55572943  | 55572943  | + | A | A |
| 1          | 116946578 | 116946578 | + | C | C |
| 22         | 39066938  | 39066938  | + | C | C |
| 11         | 1026082   | 1026082   | + | G | G |
| 21         | 17763939  | 17763939  | + | C | C |
| GL000237.1 | 74        | 74        | + | T | T |
| 10         | 18266884  | 18266884  | + | G | G |
| 9          | 127764259 | 127764259 | + | G | G |
| 2          | 172965280 | 172965280 | + | C | C |
| 1          | 156639090 | 156639090 | + | C | C |
| 17         | 42452502  | 42452502  | + | C | C |
| 11         | 49204768  | 49204768  | + | C | C |
| 10         | 85985231  | 85985231  | + | C | C |
| 3          | 2777921   | 2777921   | + | G | G |
| 8          | 143867978 | 143867978 | + | C | C |
| 6          | 152772217 | 152772217 | + | G | G |
| 2          | 10811759  | 10811759  | + | A | A |
| 20         | 3673409   | 3673409   | + | C | C |
| 2          | 61454275  | 61454275  | + | T | T |
| 8          | 27320997  | 27320997  | + | G | G |
| 12         | 7596704   | 7596704   | + | G | G |
| 6          | 46659727  | 46659727  | + | G | G |
| 7          | 137028511 | 137028511 | + | G | G |
| 22         | 37890249  | 37890249  | + | G | G |
| 12         | 70049350  | 70049350  | + | G | G |
| 1          | 228645306 | 228645306 | + | C | C |
| 7          | 105752628 | 105752628 | + | G | G |
| 5          | 39202921  | 39202921  | + | G | G |
| 15         | 83935724  | 83935724  | + | C | C |
| 6          | 105606361 | 105606361 | + | C | C |
| 19         | 58132727  | 58132727  | + | C | C |
| 6          | 52843114  | 52843114  | + | C | C |
| 20         | 9459829   | 9459829   | + | C | C |

|            |           |           |   |   |   |
|------------|-----------|-----------|---|---|---|
| 6          | 170632174 | 170632174 | + | G | G |
| 9          | 84532210  | 84532210  | + | G | G |
| 1          | 233802591 | 233802591 | + | C | C |
| 2          | 7023653   | 7023653   | + | C | C |
| 2          | 179702224 | 179702224 | + | G | G |
| 7          | 100551128 | 100551128 | + | C | C |
| 16         | 29999659  | 29999659  | + | C | C |
| 1          | 185966560 | 185966560 | + | G | G |
| 16         | 667247    | 667247    | + | G | G |
| 7          | 127224848 | 127224848 | + | G | G |
| 1          | 248112520 | 248112520 | + | C | C |
| 2          | 89533738  | 89533738  | + | G | G |
| 17         | 20334235  | 20334235  | + | C | C |
| 6          | 132910835 | 132910835 | + | C | C |
| 3          | 119135115 | 119135115 | + | C | C |
| 7          | 20197992  | 20197992  | + | C | C |
| 9          | 16429996  | 16429996  | + | A | A |
| 11         | 67400081  | 67400081  | + | C | C |
| 15         | 90276398  | 90276398  | + | C | C |
| GL000192.1 | 147958    | 147958    | + | C | C |
| 9          | 113238463 | 113238463 | + | G | G |
| 11         | 57947196  | 57947196  | + | T | T |
| 3          | 159482411 | 159482411 | + | C | C |
| 17         | 42427684  | 42427684  | + | C | C |
| 19         | 41073891  | 41073891  | + | C | C |
| 19         | 38384438  | 38384438  | + | G | G |
| 7          | 12668772  | 12668772  | + | C | C |
| Y          | 16953513  | 16953513  | + | T | T |
| 6          | 49754324  | 49754324  | + | C | C |
| 3          | 10264409  | 10264409  | + | C | C |
| 8          | 130789639 | 130789639 | + | G | G |
| 1          | 145532169 | 145532169 | + | G | G |
| 17         | 19091388  | 19091388  | + | T | T |
| 9          | 33307231  | 33307231  | + | C | C |
| 6          | 12123590  | 12123590  | + | C | C |
| 12         | 53042866  | 53042866  | + | C | C |
| 22         | 50493027  | 50493027  | + | G | G |
| 6          | 70972949  | 70972949  | + | G | G |
| 2          | 16085833  | 16085833  | + | C | C |
| 7          | 106301066 | 106301066 | + | G | G |
| 21         | 44270082  | 44270082  | + | G | G |
| 11         | 10777316  | 10777316  | + | C | C |
| 11         | 59811047  | 59811047  | + | G | G |

|    |           |           |   |   |   |
|----|-----------|-----------|---|---|---|
| 11 | 75298736  | 75298736  | + | T | T |
| 2  | 184024268 | 184024268 | + | T | T |
| 19 | 35776014  | 35776014  | + | G | G |
| 6  | 36930857  | 36930857  | + | G | G |
| 12 | 51236916  | 51236916  | + | G | G |
| 2  | 170362160 | 170362160 | + | C | C |
| 19 | 51480936  | 51480936  | + | C | C |
| 4  | 114177071 | 114177071 | + | C | C |
| X  | 74636958  | 74636958  | + | C | C |
| 2  | 220167174 | 220167174 | + | G | G |
| 5  | 59189320  | 59189320  | + | G | G |
| 20 | 40713470  | 40713470  | + | G | G |
| 5  | 167545342 | 167545342 | + | G | G |
| 8  | 144657688 | 144657688 | + | G | G |
| 9  | 125315516 | 125315516 | + | A | A |
| 14 | 96707667  | 96707667  | + | C | C |
| 1  | 167097491 | 167097491 | + | C | C |
| 3  | 30029707  | 30029707  | + | C | C |
| 16 | 31309267  | 31309267  | + | C | C |
| 6  | 117638312 | 117638312 | + | C | C |
| 7  | 1275802   | 1275802   | + | C | C |
| 2  | 95513821  | 95513821  | + | G | G |
| 8  | 19171320  | 19171320  | + | G | G |
| 15 | 64056360  | 64056360  | + | C | C |
| 8  | 144657687 | 144657687 | + | G | G |
| 15 | 43701259  | 43701259  | + | A | A |
| 17 | 27308932  | 27308932  | + | C | C |
| 3  | 65364889  | 65364889  | + | C | C |
| 18 | 13387627  | 13387627  | + | G | G |
| 18 | 7231244   | 7231244   | + | G | G |
| X  | 3524563   | 3524563   | + | G | G |
| 12 | 70932110  | 70932110  | + | G | G |
| 12 | 3702301   | 3702301   | + | G | G |
| 22 | 24483657  | 24483657  | + | C | C |
| 19 | 46206368  | 46206368  | + | G | G |
| X  | 68424833  | 68424833  | + | C | C |
| 17 | 80615874  | 80615874  | + | C | C |
| 7  | 92764593  | 92764593  | + | G | G |
| 12 | 26220526  | 26220526  | + | T | T |
| 11 | 121039520 | 121039520 | + | G | G |
| 3  | 112190096 | 112190096 | + | G | G |
| 19 | 18976417  | 18976417  | + | A | A |
| 16 | 67290857  | 67290857  | + | C | C |

|    |           |           |   |   |   |
|----|-----------|-----------|---|---|---|
| 10 | 106976708 | 106976708 | + | G | G |
| 1  | 202407073 | 202407073 | + | C | C |
| 20 | 34065887  | 34065887  | + | C | C |
| 5  | 65088442  | 65088442  | + | T | T |
| 7  | 56174183  | 56174183  | + | G | G |
| 15 | 41961693  | 41961693  | + | C | C |
| 3  | 130098556 | 130098556 | + | G | G |
| 12 | 81655747  | 81655747  | + | C | C |
| 22 | 37890250  | 37890250  | + | G | G |
| 1  | 172501640 | 172501640 | + | C | C |
| 13 | 96529977  | 96529977  | + | A | A |
| 2  | 121981932 | 121981932 | + | C | C |
| 3  | 10861158  | 10861158  | + | C | C |
| 16 | 88772988  | 88772988  | + | C | C |
| 5  | 140176921 | 140176921 | + | C | C |
| 2  | 21228841  | 21228841  | + | C | C |
| 19 | 19460213  | 19460213  | + | G | G |
| 21 | 46021512  | 46021512  | + | C | C |
| X  | 152685716 | 152685716 | + | C | C |
| 5  | 33937783  | 33937783  | + | C | C |
| 18 | 42532555  | 42532555  | + | C | C |
| 16 | 3190878   | 3190878   | + | C | C |
| 7  | 100842051 | 100842051 | + | C | C |
| 16 | 30616232  | 30616232  | + | C | C |
| 17 | 20406020  | 20406020  | + | C | C |
| 10 | 105963514 | 105963514 | + | G | G |
| 9  | 113149645 | 113149645 | + | C | C |
| 2  | 171371440 | 171371440 | + | C | C |
| 7  | 100675122 | 100675122 | + | C | C |
| 11 | 118006024 | 118006024 | + | C | C |
| 19 | 8959678   | 8959678   | + | C | C |
| 2  | 160688294 | 160688294 | + | G | G |
| 1  | 156206094 | 156206094 | + | C | C |
| 3  | 140695203 | 140695203 | + | C | C |
| 2  | 144525600 | 144525600 | + | C | C |
| 11 | 4968047   | 4968047   | + | G | G |
| 19 | 5739428   | 5739428   | + | G | G |
| 14 | 92040664  | 92040664  | + | C | C |
| 5  | 76987233  | 76987233  | + | G | G |
| 12 | 45457748  | 45457748  | + | G | G |
| 20 | 3653948   | 3653948   | + | G | G |
| 11 | 117780523 | 117780523 | + | G | G |
| 3  | 51749772  | 51749772  | + | C | C |

|    |           |           |   |   |   |
|----|-----------|-----------|---|---|---|
| 19 | 16146811  | 16146811  | + | G | G |
| 5  | 64468672  | 64468672  | + | C | C |
| 19 | 54784967  | 54784967  | + | G | G |
| 4  | 42467021  | 42467021  | + | G | G |
| 13 | 25745043  | 25745043  | + | C | C |
| 12 | 124352637 | 124352637 | + | G | G |
| 3  | 47047466  | 47047466  | + | G | G |
| 8  | 3076911   | 3076911   | + | G | G |
| 6  | 83880050  | 83880050  | + | G | G |
| 7  | 122033355 | 122033355 | + | C | C |
| 7  | 81964492  | 81964492  | + | C | C |
| 12 | 131488791 | 131488791 | + | C | C |
| 11 | 61675725  | 61675725  | + | G | G |
| 20 | 37464766  | 37464766  | + | C | C |
| 5  | 131411598 | 131411598 | + | G | G |
| 17 | 67210991  | 67210991  | + | A | A |
| 10 | 101715970 | 101715970 | + | G | G |
| 20 | 42635352  | 42635352  | + | C | C |
| 2  | 179542615 | 179542615 | + | G | G |
| 14 | 74973894  | 74973894  | + | C | C |
| 16 | 4411869   | 4411869   | + | G | G |
| 10 | 69281635  | 69281635  | + | C | C |
| 18 | 13621138  | 13621138  | + | C | C |
| 3  | 130125158 | 130125158 | + | G | G |
| 15 | 28517377  | 28517377  | + | G | G |
| 12 | 113379404 | 113379404 | + | C | C |
| 20 | 30193913  | 30193913  | + | G | G |
| X  | 52826319  | 52826319  | + | C | C |
| 12 | 98926672  | 98926672  | + | C | C |
| 17 | 78882688  | 78882688  | + | T | T |
| 15 | 62538191  | 62538191  | + | C | C |
| 15 | 65147225  | 65147225  | + | C | C |
| 2  | 16734221  | 16734221  | + | G | G |
| 17 | 5487109   | 5487109   | + | G | G |
| 12 | 63195660  | 63195660  | + | G | G |
| 9  | 14842587  | 14842587  | + | C | C |
| 10 | 123353299 | 123353299 | + | G | G |
| 1  | 102271716 | 102271716 | + | G | G |
| 2  | 179664029 | 179664029 | + | A | A |
| 8  | 35650703  | 35650703  | + | C | C |
| 2  | 228144509 | 228144509 | + | G | G |
| 7  | 96113214  | 96113214  | + | G | G |
| 21 | 41385160  | 41385160  | + | G | G |

|    |           |           |   |   |   |
|----|-----------|-----------|---|---|---|
| 20 | 18768645  | 18768645  | + | G | G |
| 12 | 54929930  | 54929930  | + | G | G |
| 10 | 47087777  | 47087777  | + | G | G |
| 1  | 241842850 | 241842850 | + | G | G |
| 19 | 8982206   | 8982206   | + | G | G |
| 2  | 220073831 | 220073831 | + | G | G |
| 1  | 165738133 | 165738133 | + | C | C |
| 17 | 42829236  | 42829236  | + | C | C |
| 2  | 204305249 | 204305249 | + | T | T |
| 19 | 10131478  | 10131478  | + | T | T |
| 19 | 52147162  | 52147162  | + | A | A |
| 11 | 9980570   | 9980570   | + | C | C |
| 7  | 21789963  | 21789963  | + | G | G |
| 11 | 65622723  | 65622723  | + | G | G |
| 10 | 123954584 | 123954584 | + | C | C |
| 8  | 54163398  | 54163398  | + | G | G |
| 5  | 95728690  | 95728690  | + | G | G |
| 12 | 101510498 | 101510498 | + | G | G |
| 17 | 4855440   | 4855440   | + | G | G |
| 19 | 10079138  | 10079138  | + | G | G |
| 11 | 111324264 | 111324264 | + | G | G |
| 2  | 241404628 | 241404628 | + | G | G |
| 11 | 9167314   | 9167314   | + | G | G |
| 9  | 79324960  | 79324960  | + | G | G |
| 17 | 41720974  | 41720974  | + | C | C |
| 6  | 33036366  | 33036366  | + | C | C |
| 3  | 182913012 | 182913012 | + | C | C |
| 8  | 41615592  | 41615592  | + | G | G |
| 5  | 41004982  | 41004982  | + | C | C |
| 15 | 44037355  | 44037355  | + | A | A |
| 14 | 105268565 | 105268565 | + | C | C |
| 3  | 7620310   | 7620310   | + | C | C |
| 11 | 6953459   | 6953459   | + | C | C |
| 14 | 69816796  | 69816796  | + | G | G |
| 3  | 369967    | 369967    | + | G | G |
| 14 | 94770778  | 94770778  | + | C | C |
| 6  | 56397277  | 56397277  | + | G | G |
| 5  | 102488416 | 102488416 | + | G | G |
| 12 | 104374682 | 104374682 | + | C | C |
| 2  | 131878453 | 131878453 | + | C | C |
| 15 | 88522391  | 88522391  | + | C | C |
| 17 | 7107343   | 7107343   | + | T | T |
| 19 | 55053854  | 55053854  | + | C | C |

|    |           |           |   |   |   |
|----|-----------|-----------|---|---|---|
| 19 | 38795501  | 38795501  | + | C | C |
| 22 | 37578570  | 37578570  | + | G | G |
| 11 | 100179329 | 100179329 | + | A | A |
| 7  | 23353157  | 23353157  | + | C | C |
| 10 | 99350212  | 99350212  | + | G | G |
| 11 | 14276223  | 14276223  | + | T | T |
| 15 | 102294790 | 102294790 | + | C | C |
| 3  | 14565211  | 14565211  | + | G | G |
| 11 | 4566673   | 4566673   | + | G | G |
| 17 | 39670840  | 39670840  | + | G | G |
| 11 | 105967473 | 105967473 | + | C | C |
| 12 | 96386495  | 96386495  | + | G | G |
| 10 | 43610117  | 43610117  | + | C | C |
| 19 | 48205591  | 48205591  | + | C | C |
| 3  | 170611147 | 170611147 | + | G | G |
| 13 | 28610099  | 28610099  | + | C | C |
| 2  | 183888627 | 183888627 | + | C | C |
| 17 | 39671079  | 39671079  | + | C | C |
| 11 | 119005071 | 119005071 | + | C | C |
| 22 | 18561052  | 18561052  | + | C | C |
| 13 | 20220643  | 20220643  | + | A | A |
| 16 | 1396028   | 1396028   | + | G | G |
| 2  | 170090027 | 170090027 | + | C | C |
| 21 | 31709534  | 31709534  | + | G | G |
| 15 | 31775780  | 31775780  | + | G | G |
| 3  | 13384750  | 13384750  | + | G | G |
| 2  | 135745372 | 135745372 | + | C | C |
| 19 | 37064279  | 37064279  | + | G | G |
| 21 | 16338783  | 16338783  | + | C | C |
| 12 | 52574474  | 52574474  | + | G | G |
| 16 | 3255171   | 3255171   | + | G | G |
| 22 | 43950806  | 43950806  | + | G | G |
| 19 | 51534065  | 51534065  | + | G | G |
| 18 | 61170576  | 61170576  | + | T | T |
| 7  | 18633566  | 18633566  | + | C | C |
| 16 | 22446056  | 22446056  | + | C | C |
| 11 | 14282259  | 14282259  | + | G | G |
| 6  | 25921587  | 25921587  | + | G | G |
| 5  | 147486600 | 147486600 | + | G | G |
| 12 | 110600795 | 110600795 | + | C | C |
| 7  | 107664379 | 107664379 | + | G | G |
| 22 | 29656742  | 29656742  | + | G | G |
| 11 | 5021123   | 5021123   | + | G | G |

|    |           |           |   |   |   |
|----|-----------|-----------|---|---|---|
| X  | 47658212  | 47658212  | + | G | G |
| 7  | 144077170 | 144077170 | + | C | C |
| 17 | 7287918   | 7287918   | + | C | C |
| 17 | 76803147  | 76803147  | + | G | G |
| 19 | 6413506   | 6413506   | + | G | G |
| 17 | 17083348  | 17083348  | + | C | C |
| 1  | 157494336 | 157494336 | + | G | G |
| 2  | 160710182 | 160710182 | + | C | C |
| 10 | 70333291  | 70333291  | + | C | C |
| 9  | 65508191  | 65508191  | + | A | A |
| 18 | 8825047   | 8825047   | + | G | G |
| 21 | 47737129  | 47737129  | + | G | G |
| 8  | 29927303  | 29927303  | + | G | G |
| 17 | 62859264  | 62859264  | + | G | G |
| 11 | 119229813 | 119229813 | + | G | G |
| 7  | 141898476 | 141898476 | + | A | A |
| 9  | 114449075 | 114449075 | + | C | C |
| 14 | 22134148  | 22134148  | + | C | C |
| 7  | 147075205 | 147075205 | + | T | T |
| 18 | 61310682  | 61310682  | + | C | C |
| 1  | 213184571 | 213184571 | + | G | G |
| 16 | 83998937  | 83998937  | + | C | C |
| 12 | 5153501   | 5153501   | + | G | G |
| 4  | 169931266 | 169931266 | + | G | G |
| 11 | 5617953   | 5617953   | + | C | C |
| 5  | 49707105  | 49707105  | + | C | C |
| 14 | 92102822  | 92102822  | + | C | C |
| 2  | 131595082 | 131595082 | + | G | G |
| 14 | 71413638  | 71413638  | + | C | C |
| 15 | 67782339  | 67782339  | + | A | A |
| 11 | 103866886 | 103866886 | + | C | C |
| 18 | 5890249   | 5890249   | + | G | G |
| 8  | 35647995  | 35647995  | + | G | G |
| 1  | 196918662 | 196918662 | + | C | C |
| 19 | 52448288  | 52448288  | + | G | G |
| 14 | 24884163  | 24884163  | + | G | G |
| 17 | 29533315  | 29533315  | + | C | C |
| 7  | 64439495  | 64439495  | + | G | G |
| 1  | 204589162 | 204589162 | + | G | G |
| 2  | 219029648 | 219029648 | + | G | G |
| 1  | 156555588 | 156555588 | + | G | G |
| 17 | 19459304  | 19459304  | + | C | C |
| 19 | 55143042  | 55143042  | + | G | G |



|    |           |           |   |   |   |
|----|-----------|-----------|---|---|---|
| 12 | 55524127  | 55524127  | + | C | C |
| 5  | 13830731  | 13830731  | + | G | G |
| 7  | 18767212  | 18767212  | + | G | G |
| 19 | 42410897  | 42410897  | + | C | C |
| 1  | 82409009  | 82409009  | + | G | G |
| 5  | 71490650  | 71490650  | + | C | C |
| 7  | 102824479 | 102824479 | + | A | A |
| 16 | 30593852  | 30593852  | + | G | G |
| 7  | 2579206   | 2579206   | + | G | G |
| 2  | 73786166  | 73786166  | + | A | A |
| 2  | 179396183 | 179396183 | + | G | G |
| 1  | 228645201 | 228645201 | + | A | A |
| 2  | 166231225 | 166231225 | + | C | C |
| 19 | 56369290  | 56369290  | + | C | C |
| 6  | 33967764  | 33967764  | + | G | G |
| 7  | 141765224 | 141765224 | + | G | G |
| 13 | 75814103  | 75814103  | + | C | C |
| 3  | 127379305 | 127379305 | + | C | C |
| 1  | 197390437 | 197390437 | + | C | C |
| 1  | 237948205 | 237948205 | + | C | C |
| 19 | 10472508  | 10472508  | + | G | G |
| 19 | 37677381  | 37677381  | + | G | G |
| 11 | 65985030  | 65985030  | + | A | A |
| 7  | 146997283 | 146997283 | + | G | G |
| 18 | 33718314  | 33718314  | + | C | C |
| 11 | 78387365  | 78387365  | + | C | C |
| 19 | 52918940  | 52918940  | + | C | C |
| 15 | 50785631  | 50785631  | + | G | G |
| 19 | 48043063  | 48043063  | + | C | C |
| 8  | 42977435  | 42977435  | + | C | C |
| 19 | 45406527  | 45406527  | + | C | C |
| 12 | 60165082  | 60165082  | + | G | G |
| 3  | 46666755  | 46666755  | + | A | A |
| 1  | 227171807 | 227171807 | + | G | G |
| 10 | 46998946  | 46998946  | + | C | C |
| 3  | 142279242 | 142279242 | + | C | C |
| 18 | 6959342   | 6959342   | + | C | C |
| 19 | 45898767  | 45898767  | + | C | C |
| 2  | 132266169 | 132266169 | + | C | C |
| 17 | 4837901   | 4837901   | + | C | C |
| 3  | 99514492  | 99514492  | + | G | G |
| 4  | 68586347  | 68586347  | + | C | C |
| 1  | 179497486 | 179497486 | + | G | G |

|    |           |           |   |   |   |
|----|-----------|-----------|---|---|---|
| 19 | 5867642   | 5867642   | + | G | G |
| 17 | 38133214  | 38133214  | + | C | C |
| 3  | 38592126  | 38592126  | + | G | G |
| 10 | 95326558  | 95326558  | + | C | C |
| 22 | 50280367  | 50280367  | + | G | G |
| 17 | 73497702  | 73497702  | + | C | C |
| 3  | 37056035  | 37056035  | + | C | C |
| 11 | 5730301   | 5730301   | + | C | C |
| 5  | 32000340  | 32000340  | + | C | C |
| X  | 73046891  | 73046891  | + | C | C |
| 7  | 30694416  | 30694416  | + | C | C |
| 2  | 207527805 | 207527805 | + | C | C |
| 4  | 71200826  | 71200826  | + | G | G |
| 11 | 82444733  | 82444733  | + | G | G |
| 7  | 148506475 | 148506475 | + | C | C |
| 14 | 77697979  | 77697979  | + | C | C |
| 12 | 91348355  | 91348355  | + | G | G |
| 1  | 225155541 | 225155541 | + | A | A |
| 13 | 52686426  | 52686426  | + | C | C |
| 16 | 18597137  | 18597137  | + | G | G |
| 9  | 140167458 | 140167458 | + | G | G |
| 2  | 179611225 | 179611225 | + | G | G |
| 18 | 46808442  | 46808442  | + | G | G |
| 12 | 117014000 | 117014000 | + | G | G |
| 19 | 43268116  | 43268116  | + | C | C |
| 11 | 608819    | 608819    | + | G | G |
| 16 | 30725026  | 30725026  | + | C | C |
| 21 | 46021513  | 46021513  | + | C | C |
| 11 | 56468407  | 56468407  | + | C | C |
| 20 | 5296668   | 5296668   | + | G | G |
| 6  | 46977301  | 46977301  | + | G | G |
| X  | 47978928  | 47978928  | + | G | G |
| 1  | 213009263 | 213009263 | + | T | T |
| 15 | 81199004  | 81199004  | + | G | G |
| 11 | 60638692  | 60638692  | + | G | G |
| 17 | 37264482  | 37264482  | + | C | C |
| X  | 30578348  | 30578348  | + | G | G |
| 12 | 102067366 | 102067366 | + | C | C |
| 6  | 38838320  | 38838320  | + | G | G |
| 1  | 112270276 | 112270276 | + | G | G |
| 12 | 29617456  | 29617456  | + | C | C |
| 8  | 11189596  | 11189596  | + | C | C |
| 2  | 109513637 | 109513637 | + | C | C |

|    |           |           |   |   |   |
|----|-----------|-----------|---|---|---|
| 7  | 115624397 | 115624397 | + | C | C |
| 17 | 71282655  | 71282655  | + | G | G |
| 19 | 4523778   | 4523778   | + | C | C |
| 10 | 75551746  | 75551746  | + | C | C |
| 5  | 168216613 | 168216613 | + | G | G |
| 20 | 39832464  | 39832464  | + | G | G |
| 11 | 8739373   | 8739373   | + | G | G |
| 17 | 73257954  | 73257954  | + | C | C |
| 17 | 41898374  | 41898374  | + | G | G |
| 11 | 5530759   | 5530759   | + | C | C |
| 8  | 52359601  | 52359601  | + | C | C |
| 7  | 150840580 | 150840580 | + | C | C |
| 16 | 20489943  | 20489943  | + | G | G |
| 5  | 55243388  | 55243388  | + | G | G |
| 12 | 46230550  | 46230550  | + | G | G |
| 17 | 80109461  | 80109461  | + | G | G |
| 11 | 13032483  | 13032483  | + | C | C |
| 2  | 232143139 | 232143139 | + | C | C |
| 20 | 31611159  | 31611159  | + | G | G |
| 15 | 22413796  | 22413796  | + | G | G |
| 11 | 120178273 | 120178273 | + | G | G |
| 16 | 81303899  | 81303899  | + | G | G |
| 6  | 30671877  | 30671877  | + | G | G |
| 18 | 74778255  | 74778255  | + | G | G |
| 12 | 335622    | 335622    | + | T | T |
| 12 | 5604142   | 5604142   | + | C | C |
| 3  | 118942966 | 118942966 | + | G | G |
| 2  | 38916976  | 38916976  | + | C | C |
| 7  | 117227878 | 117227878 | + | C | C |
| 12 | 54428361  | 54428361  | + | C | C |
| 15 | 40627618  | 40627618  | + | G | G |
| 2  | 102835477 | 102835477 | + | G | G |
| 14 | 106380129 | 106380129 | + | C | C |
| 7  | 94913348  | 94913348  | + | G | G |
| 11 | 123516415 | 123516415 | + | C | C |
| 7  | 149148205 | 149148205 | + | T | T |
| 1  | 44595606  | 44595606  | + | G | G |
| 17 | 13503883  | 13503883  | + | G | G |
| 12 | 72338388  | 72338388  | + | C | C |
| 12 | 352852    | 352852    | + | G | G |
| 17 | 74073451  | 74073451  | + | C | C |
| 20 | 45811960  | 45811960  | + | G | G |
| 5  | 65307891  | 65307891  | + | C | C |

|    |           |           |   |   |   |
|----|-----------|-----------|---|---|---|
| 6  | 57499011  | 57499011  | + | A | A |
| 20 | 62373877  | 62373877  | + | C | C |
| 6  | 30680283  | 30680283  | + | G | G |
| 11 | 5664622   | 5664622   | + | C | C |
| Y  | 16831339  | 16831339  | + | G | G |
| 15 | 93160921  | 93160921  | + | G | G |
| 8  | 17055918  | 17055918  | + | C | C |
| 2  | 125175030 | 125175030 | + | G | G |
| 2  | 95463727  | 95463727  | + | C | C |
| 22 | 32239705  | 32239705  | + | C | C |
| 2  | 168067336 | 168067336 | + | C | C |
| 3  | 97887649  | 97887649  | + | C | C |
| 3  | 62248605  | 62248605  | + | G | G |
| 2  | 141459360 | 141459360 | + | C | C |
| 4  | 184182309 | 184182309 | + | C | C |
| 6  | 26598864  | 26598864  | + | G | G |
| 2  | 179449899 | 179449899 | + | C | C |
| 1  | 248569751 | 248569751 | + | C | C |
| 17 | 39779123  | 39779123  | + | G | G |
| 8  | 91013634  | 91013634  | + | C | C |
| 17 | 72950558  | 72950558  | + | G | G |
| 11 | 55062914  | 55062914  | + | G | G |
| 7  | 127721966 | 127721966 | + | G | G |
| 1  | 40149817  | 40149817  | + | G | G |
| 11 | 2336941   | 2336941   | + | C | C |
| 19 | 59069766  | 59069766  | + | C | C |
| 4  | 155157181 | 155157181 | + | C | C |
| 5  | 1246164   | 1246164   | + | G | G |
| 21 | 15599586  | 15599586  | + | G | G |
| 8  | 27320546  | 27320546  | + | C | C |
| 19 | 54721334  | 54721334  | + | C | C |
| 8  | 42045002  | 42045002  | + | C | C |
| X  | 27999535  | 27999535  | + | G | G |
| 19 | 58718493  | 58718493  | + | G | G |
| 5  | 74889848  | 74889848  | + | C | C |
| 5  | 89781499  | 89781499  | + | C | C |
| 1  | 197898345 | 197898345 | + | G | G |
| 3  | 196730630 | 196730630 | + | C | C |
| X  | 148068980 | 148068980 | + | C | C |
| 1  | 32741557  | 32741557  | + | G | G |
| 11 | 113565347 | 113565347 | + | G | G |
| 8  | 10587855  | 10587855  | + | G | G |
| 11 | 605709    | 605709    | + | C | C |

|    |           |           |   |   |   |
|----|-----------|-----------|---|---|---|
| 8  | 32505781  | 32505781  | + | C | C |
| 11 | 7950149   | 7950149   | + | G | G |
| 2  | 46166     | 46166     | + | C | C |
| 20 | 42195720  | 42195720  | + | A | A |
| 1  | 51767632  | 51767632  | + | G | G |
| 14 | 76965180  | 76965180  | + | C | C |
| 11 | 5631729   | 5631729   | + | C | C |
| 12 | 104374683 | 104374683 | + | C | C |
| 17 | 44249176  | 44249176  | + | G | G |
| 3  | 119263598 | 119263598 | + | C | C |
| 16 | 29828026  | 29828026  | + | G | G |
| 5  | 67590976  | 67590976  | + | G | G |
| 5  | 49698127  | 49698127  | + | C | C |
| 12 | 119773002 | 119773002 | + | C | C |
| 3  | 123456211 | 123456211 | + | C | C |
| 14 | 74995392  | 74995392  | + | C | C |
| 9  | 8733914   | 8733914   | + | G | G |
| 8  | 86027721  | 86027721  | + | C | C |
| 16 | 57059344  | 57059344  | + | C | C |
| 8  | 24775655  | 24775655  | + | G | G |
| 20 | 33857639  | 33857639  | + | G | G |
| 12 | 10954592  | 10954592  | + | G | G |
| 19 | 9062608   | 9062608   | + | G | G |
| 10 | 98743431  | 98743431  | + | A | A |
| X  | 84526436  | 84526436  | + | C | C |
| 1  | 40878731  | 40878731  | + | C | C |
| 12 | 27113473  | 27113473  | + | C | C |
| 7  | 4116720   | 4116720   | + | G | G |
| 12 | 55038972  | 55038972  | + | C | C |
| 2  | 238283530 | 238283530 | + | G | G |
| 8  | 15601095  | 15601095  | + | C | C |
| 5  | 24511442  | 24511442  | + | C | C |
| 14 | 101439013 | 101439013 | + | G | G |
| 3  | 56763631  | 56763631  | + | G | G |
| 1  | 152280124 | 152280124 | + | G | G |
| 2  | 98408957  | 98408957  | + | C | C |
| 15 | 57731779  | 57731779  | + | C | C |
| Y  | 16953990  | 16953990  | + | G | G |
| 8  | 56436232  | 56436232  | + | G | G |
| 11 | 2018308   | 2018308   | + | G | G |
| 6  | 7231348   | 7231348   | + | C | C |
| 15 | 50555459  | 50555459  | + | C | C |
| 7  | 154748969 | 154748969 | + | T | T |

|    |           |           |   |   |   |
|----|-----------|-----------|---|---|---|
| 8  | 145699472 | 145699472 | + | G | G |
| 17 | 43367890  | 43367890  | + | C | C |
| 12 | 72863576  | 72863576  | + | G | G |
| 2  | 175978724 | 175978724 | + | G | G |
| 19 | 10514249  | 10514249  | + | C | C |
| 15 | 85383978  | 85383978  | + | G | G |
| 2  | 69693587  | 69693587  | + | G | G |
| 3  | 113022819 | 113022819 | + | C | C |
| 5  | 137673928 | 137673928 | + | G | G |
| 13 | 26911725  | 26911725  | + | T | T |
| 1  | 209788617 | 209788617 | + | C | C |
| 7  | 102427857 | 102427857 | + | C | C |
| 1  | 216850619 | 216850619 | + | G | G |
| 2  | 179592038 | 179592038 | + | G | G |
| 5  | 13770962  | 13770962  | + | G | G |
| 11 | 14880728  | 14880728  | + | T | T |
| 18 | 8825049   | 8825049   | + | A | A |
| 17 | 32953879  | 32953879  | + | C | C |
| 18 | 34802291  | 34802291  | + | G | G |
| 5  | 71492418  | 71492418  | + | G | G |
| 12 | 46601390  | 46601390  | + | C | C |
| 13 | 42739485  | 42739485  | + | G | G |
| 5  | 128448635 | 128448635 | + | G | G |
| 2  | 109065633 | 109065633 | + | G | G |
| 7  | 1544063   | 1544063   | + | G | G |
| X  | 122599601 | 122599601 | + | G | G |
| 3  | 112730023 | 112730023 | + | A | A |
| 12 | 64377861  | 64377861  | + | G | G |
| 7  | 34867194  | 34867194  | + | C | C |
| 11 | 44959915  | 44959915  | + | G | G |
| 2  | 228754597 | 228754597 | + | G | G |
| 16 | 10788717  | 10788717  | + | C | C |
| 1  | 89485819  | 89485819  | + | G | G |
| 7  | 119914637 | 119914637 | + | G | G |
| 17 | 6330289   | 6330289   | + | C | C |
| 8  | 71036968  | 71036968  | + | G | G |
| 11 | 113935117 | 113935117 | + | C | C |
| 2  | 155092571 | 155092571 | + | G | G |
| 7  | 73098207  | 73098207  | + | C | C |
| 6  | 7585138   | 7585138   | + | G | G |
| 19 | 9089213   | 9089213   | + | C | C |
| 1  | 34330296  | 34330296  | + | G | G |
| 12 | 18847955  | 18847955  | + | C | C |

|    |           |           |   |   |   |
|----|-----------|-----------|---|---|---|
| 8  | 130778006 | 130778006 | + | C | C |
| 12 | 113433126 | 113433126 | + | G | G |
| 11 | 111166961 | 111166961 | + | G | G |
| 13 | 95858807  | 95858807  | + | G | G |
| 14 | 55255777  | 55255777  | + | C | C |
| 19 | 49206737  | 49206737  | + | G | G |
| 6  | 52871118  | 52871118  | + | G | G |
| 11 | 56511000  | 56511000  | + | G | G |
| 19 | 43428758  | 43428758  | + | C | C |
| 2  | 103281750 | 103281750 | + | C | C |
| 5  | 179225943 | 179225943 | + | G | G |
| 14 | 52535584  | 52535584  | + | C | C |
| 7  | 48556372  | 48556372  | + | G | G |
| 12 | 81675070  | 81675070  | + | G | G |
| 16 | 15718670  | 15718670  | + | G | G |
| 15 | 77924708  | 77924708  | + | C | C |
| X  | 49074944  | 49074944  | + | G | G |
| 11 | 59811034  | 59811034  | + | C | C |
| 11 | 76915174  | 76915174  | + | G | G |
| 10 | 95791173  | 95791173  | + | G | G |
| 11 | 125618663 | 125618663 | + | G | G |
| 6  | 159457841 | 159457841 | + | G | G |
| 11 | 56113937  | 56113937  | + | C | C |
| 12 | 102455866 | 102455866 | + | G | G |
| 1  | 33583580  | 33583580  | + | G | G |
| 8  | 114389010 | 114389010 | + | G | G |
| 17 | 16843849  | 16843849  | + | C | C |
| 22 | 24583644  | 24583644  | + | C | C |
| 12 | 52307404  | 52307404  | + | C | C |
| 1  | 148891715 | 148891715 | + | G | G |
| 14 | 77492316  | 77492316  | + | G | G |
| 16 | 85741538  | 85741538  | + | C | C |
| 9  | 75545891  | 75545891  | + | C | C |
| 12 | 100934517 | 100934517 | + | C | C |
| 19 | 2249612   | 2249612   | + | C | C |
| 12 | 13828680  | 13828680  | + | C | C |
| 14 | 32257070  | 32257070  | + | C | C |
| 1  | 228540671 | 228540671 | + | C | C |
| X  | 151909320 | 151909320 | + | G | G |
| 11 | 45891086  | 45891086  | + | C | C |
| 5  | 96079292  | 96079292  | + | C | C |
| 13 | 103401100 | 103401100 | + | C | C |
| 16 | 49672515  | 49672515  | + | C | C |

|    |           |           |   |   |   |
|----|-----------|-----------|---|---|---|
| 1  | 248487244 | 248487244 | + | G | G |
| 1  | 152285687 | 152285687 | + | G | G |
| 8  | 52320941  | 52320941  | + | G | G |
| 8  | 21939029  | 21939029  | + | C | C |
| 6  | 138584117 | 138584117 | + | G | G |
| 6  | 87879466  | 87879466  | + | G | G |
| 5  | 54403668  | 54403668  | + | G | G |
| 7  | 5780702   | 5780702   | + | G | G |
| 1  | 1387776   | 1387776   | + | C | C |
| 7  | 127999889 | 127999889 | + | C | C |
| 14 | 106304757 | 106304757 | + | C | C |
| 2  | 170493093 | 170493093 | + | C | C |
| 15 | 86312399  | 86312399  | + | G | G |
| 16 | 75563854  | 75563854  | + | G | G |
| 5  | 149912584 | 149912584 | + | C | C |
| 6  | 133013679 | 133013679 | + | C | C |
| X  | 47918499  | 47918499  | + | G | G |
| 5  | 121188492 | 121188492 | + | A | A |
| 9  | 140114773 | 140114773 | + | G | G |
| 5  | 40981538  | 40981538  | + | G | G |
| 8  | 88885433  | 88885433  | + | C | C |
| 11 | 78437176  | 78437176  | + | G | G |
| 9  | 35607511  | 35607511  | + | C | C |
| 19 | 57647405  | 57647405  | + | G | G |
| 7  | 31920421  | 31920421  | + | G | G |
| 12 | 25242560  | 25242560  | + | C | C |
| 2  | 74781863  | 74781863  | + | G | G |
| 7  | 86394893  | 86394893  | + | G | G |
| 7  | 45956147  | 45956147  | + | C | C |
| 11 | 82536011  | 82536011  | + | C | C |
| 19 | 56030398  | 56030398  | + | C | C |
| 1  | 156377244 | 156377244 | + | G | G |
| 6  | 30640795  | 30640795  | + | G | G |
| 11 | 1269848   | 1269848   | + | C | C |
| 11 | 1094751   | 1094751   | + | C | C |
| 17 | 3651330   | 3651330   | + | G | G |
| 11 | 65985031  | 65985031  | + | G | G |
| 17 | 79287650  | 79287650  | + | G | G |
| 6  | 84563065  | 84563065  | + | C | C |
| 14 | 92608651  | 92608651  | + | C | C |
| 14 | 95875807  | 95875807  | + | G | G |
| 19 | 51645661  | 51645661  | + | G | G |
| 10 | 127760069 | 127760069 | + | C | C |



|    |           |           |   |   |   |
|----|-----------|-----------|---|---|---|
| 14 | 106066367 | 106066367 | + | G | G |
| 15 | 27222278  | 27222278  | + | G | G |
| 8  | 33369787  | 33369787  | + | T | T |
| 9  | 136521656 | 136521656 | + | G | G |
| 2  | 73315193  | 73315193  | + | G | G |
| 7  | 116862107 | 116862107 | + | C | C |
| 19 | 50978751  | 50978751  | + | C | C |
| 8  | 62577792  | 62577792  | + | G | G |
| 7  | 91875712  | 91875712  | + | G | G |
| 19 | 36207574  | 36207574  | + | C | C |
| 7  | 150325074 | 150325074 | + | C | C |
| 8  | 73480013  | 73480013  | + | G | G |
| 5  | 140559485 | 140559485 | + | G | G |
| 22 | 32218718  | 32218718  | + | C | C |
| 11 | 111420355 | 111420355 | + | G | G |
| 20 | 25439133  | 25439133  | + | G | G |
| 6  | 168445646 | 168445646 | + | C | C |
| 12 | 5153500   | 5153500   | + | G | G |
| 9  | 133972218 | 133972218 | + | C | C |
| 3  | 45837794  | 45837794  | + | C | C |
| 13 | 100958088 | 100958088 | + | C | C |
| 16 | 31371742  | 31371742  | + | C | C |
| 19 | 6413505   | 6413505   | + | G | G |
| 22 | 30200791  | 30200791  | + | G | G |
| 12 | 49396445  | 49396445  | + | G | G |
| 11 | 62850750  | 62850750  | + | C | C |
| X  | 140996476 | 140996476 | + | C | C |
| 1  | 158606502 | 158606502 | + | C | C |
| 7  | 75695673  | 75695673  | + | C | C |
| 14 | 65198186  | 65198186  | + | C | C |
| 2  | 119604272 | 119604272 | + | G | G |
| 1  | 22151167  | 22151167  | + | G | G |
| 12 | 56095165  | 56095165  | + | C | C |
| 6  | 136888816 | 136888816 | + | G | G |
| 4  | 183664419 | 183664419 | + | C | C |
| 18 | 13762165  | 13762165  | + | G | G |
| 3  | 151458455 | 151458455 | + | C | C |
| 6  | 27218540  | 27218540  | + | C | C |
| 19 | 36271166  | 36271166  | + | C | C |
| 21 | 38117301  | 38117301  | + | G | G |
| 14 | 52955198  | 52955198  | + | G | G |
| 4  | 85937     | 85937     | + | C | C |
| 10 | 89685269  | 89685269  | + | G | G |

|    |           |           |   |   |   |
|----|-----------|-----------|---|---|---|
| 11 | 121415952 | 121415952 | + | G | G |
| 17 | 76087521  | 76087521  | + | C | C |
| 11 | 64889856  | 64889856  | + | G | G |
| 4  | 125591464 | 125591464 | + | C | C |
| 1  | 176759113 | 176759113 | + | G | G |
| 19 | 46270286  | 46270286  | + | G | G |
| 20 | 29632693  | 29632693  | + | G | G |
| 12 | 120659546 | 120659546 | + | C | C |
| 17 | 10354156  | 10354156  | + | C | C |
| 15 | 90213376  | 90213376  | + | C | C |
| 10 | 79397445  | 79397445  | + | C | C |
| 1  | 240255037 | 240255037 | + | C | C |
| 7  | 100551983 | 100551983 | + | C | C |
| 16 | 68894023  | 68894023  | + | C | C |
| 19 | 15918674  | 15918674  | + | G | G |
| 12 | 66221848  | 66221848  | + | C | C |
| 17 | 7400258   | 7400258   | + | T | T |
| 17 | 73733666  | 73733666  | + | C | C |
| 12 | 21331515  | 21331515  | + | T | T |
| 11 | 2337647   | 2337647   | + | G | G |
| 19 | 8434162   | 8434162   | + | G | G |
| 2  | 130921959 | 130921959 | + | G | G |
| 17 | 8049452   | 8049452   | + | G | G |
| 12 | 50188964  | 50188964  | + | C | C |
| 2  | 165349586 | 165349586 | + | G | G |
| 5  | 26915906  | 26915906  | + | C | C |
| 3  | 186953610 | 186953610 | + | C | C |
| 4  | 146682261 | 146682261 | + | G | G |
| 2  | 24952673  | 24952673  | + | G | G |
| 15 | 30012196  | 30012196  | + | G | G |
| 16 | 30486860  | 30486860  | + | G | G |
| 6  | 125231211 | 125231211 | + | G | G |
| 17 | 5042570   | 5042570   | + | T | T |
| 2  | 238285472 | 238285472 | + | G | G |
| 19 | 51363136  | 51363136  | + | C | C |
| 15 | 40590463  | 40590463  | + | G | G |
| 12 | 47472265  | 47472265  | + | C | C |
| 12 | 13140236  | 13140236  | + | G | G |
| X  | 153224033 | 153224033 | + | G | G |
| 11 | 46917566  | 46917566  | + | G | G |
| 21 | 16339138  | 16339138  | + | G | G |
| 15 | 41853786  | 41853786  | + | G | G |
| 7  | 87175272  | 87175272  | + | G | G |

|    |           |           |   |   |   |
|----|-----------|-----------|---|---|---|
| 5  | 149375963 | 149375963 | + | C | C |
| 6  | 30078419  | 30078419  | + | C | C |
| 3  | 196612926 | 196612926 | + | C | C |
| 19 | 16339730  | 16339730  | + | G | G |
| 6  | 32903094  | 32903094  | + | G | G |
| 1  | 207643418 | 207643418 | + | G | G |
| 10 | 18690884  | 18690884  | + | C | C |
| 2  | 179631247 | 179631247 | + | G | G |
| 19 | 2834526   | 2834526   | + | C | C |
| 2  | 131595083 | 131595083 | + | G | G |
| 18 | 673021    | 673021    | + | G | G |
| 11 | 45834084  | 45834084  | + | G | G |
| 5  | 127638767 | 127638767 | + | C | C |
| 19 | 53911517  | 53911517  | + | C | C |
| 11 | 123504896 | 123504896 | + | G | G |
| 21 | 44474025  | 44474025  | + | T | T |
| 2  | 26536314  | 26536314  | + | G | G |
| 7  | 37907475  | 37907475  | + | G | G |
| 5  | 148384326 | 148384326 | + | C | C |
| 2  | 29455205  | 29455205  | + | G | G |
| 15 | 40231717  | 40231717  | + | C | C |
| 7  | 102738767 | 102738767 | + | C | C |
| X  | 123043361 | 123043361 | + | G | G |
| 5  | 22142530  | 22142530  | + | C | C |
| 12 | 29617457  | 29617457  | + | C | C |
| 19 | 40151154  | 40151154  | + | G | G |
| 1  | 223396813 | 223396813 | + | C | C |
| 1  | 55089122  | 55089122  | + | G | G |
| 21 | 45826632  | 45826632  | + | C | C |
| 12 | 109536040 | 109536040 | + | C | C |
| 11 | 4790462   | 4790462   | + | C | C |
| 11 | 722721    | 722721    | + | C | C |
| 18 | 61066504  | 61066504  | + | G | G |
| 1  | 248737339 | 248737339 | + | C | C |
| 12 | 31303183  | 31303183  | + | G | G |
| 7  | 144101650 | 144101650 | + | G | G |
| 2  | 56094082  | 56094082  | + | G | G |
| 9  | 80046245  | 80046245  | + | G | G |
| 19 | 11832642  | 11832642  | + | G | G |
| 2  | 138169379 | 138169379 | + | C | C |
| 11 | 75154161  | 75154161  | + | G | G |
| 19 | 12382914  | 12382914  | + | G | G |
| 8  | 27288791  | 27288791  | + | G | G |

|    |           |           |   |   |   |
|----|-----------|-----------|---|---|---|
| 8  | 24199170  | 24199170  | + | G | G |
| 7  | 155094467 | 155094467 | + | C | C |
| 3  | 35770914  | 35770914  | + | C | C |
| 11 | 66103456  | 66103456  | + | G | G |
| 10 | 123844338 | 123844338 | + | C | C |
| 2  | 179426257 | 179426257 | + | C | C |
| 2  | 119726764 | 119726764 | + | G | G |
| 1  | 94654852  | 94654852  | + | G | G |
| 6  | 116821759 | 116821759 | + | G | G |
| 10 | 105361947 | 105361947 | + | G | G |
| 7  | 143771652 | 143771652 | + | C | C |
| 9  | 8340385   | 8340385   | + | G | G |
| 9  | 37746349  | 37746349  | + | G | G |
| 2  | 33413645  | 33413645  | + | G | G |
| 1  | 176145089 | 176145089 | + | G | G |
| 17 | 79617731  | 79617731  | + | G | G |
| 10 | 106976707 | 106976707 | + | G | G |
| 3  | 124223598 | 124223598 | + | G | G |
| 20 | 62904879  | 62904879  | + | C | C |
| 9  | 35813372  | 35813372  | + | C | C |
| 21 | 33371079  | 33371079  | + | C | C |
| 11 | 64825709  | 64825709  | + | C | C |
| 12 | 54920357  | 54920357  | + | C | C |
| 5  | 152002865 | 152002865 | + | G | G |
| 14 | 94942479  | 94942479  | + | A | A |
| 3  | 124731556 | 124731556 | + | G | G |
| 19 | 54313876  | 54313876  | + | G | G |
| 6  | 12163721  | 12163721  | + | C | C |
| 5  | 175111052 | 175111052 | + | C | C |
| 16 | 88772987  | 88772987  | + | C | C |
| 7  | 144015486 | 144015486 | + | C | C |
| 12 | 94562982  | 94562982  | + | C | C |
| 11 | 45117310  | 45117310  | + | G | G |
| 12 | 7285594   | 7285594   | + | C | C |
| 6  | 12123589  | 12123589  | + | T | T |
| 1  | 156390176 | 156390176 | + | C | C |
| 2  | 119915760 | 119915760 | + | C | C |
| 17 | 38938542  | 38938542  | + | G | G |
| 1  | 153963239 | 153963239 | + | C | C |
| 11 | 65270423  | 65270423  | + | C | C |
| 1  | 152552011 | 152552011 | + | C | C |
| 7  | 51261176  | 51261176  | + | T | T |
| 20 | 31763366  | 31763366  | + | G | G |

|    |           |           |   |   |   |
|----|-----------|-----------|---|---|---|
| 1  | 180913625 | 180913625 | + | G | G |
| 20 | 42887194  | 42887194  | + | C | C |
| 8  | 57026314  | 57026314  | + | C | C |
| 20 | 34568410  | 34568410  | + | C | C |
| 12 | 7252394   | 7252394   | + | G | G |
| 14 | 51370116  | 51370116  | + | C | C |
| 1  | 248737528 | 248737528 | + | C | C |
| 4  | 905894    | 905894    | + | G | G |
| 5  | 167302993 | 167302993 | + | C | C |
| 6  | 101295951 | 101295951 | + | C | C |
| 19 | 53086113  | 53086113  | + | G | G |
| 15 | 83222672  | 83222672  | + | G | G |
| 12 | 49523341  | 49523341  | + | C | C |
| 20 | 49576621  | 49576621  | + | G | G |
| 5  | 180277797 | 180277797 | + | G | G |
| X  | 77913372  | 77913372  | + | G | G |
| 22 | 38121935  | 38121935  | + | C | C |
| 2  | 11333939  | 11333939  | + | C | C |
| 1  | 228473919 | 228473919 | + | G | G |
| 8  | 30669939  | 30669939  | + | G | G |
| 19 | 9066169   | 9066169   | + | G | G |
| 1  | 193219931 | 193219931 | + | C | C |
| 19 | 32083814  | 32083814  | + | G | G |
| 6  | 29523729  | 29523729  | + | C | C |
| X  | 32380980  | 32380980  | + | C | C |
| 11 | 56949256  | 56949256  | + | G | G |
| 12 | 1965275   | 1965275   | + | C | C |
| 12 | 57873114  | 57873114  | + | G | G |
| 3  | 8590456   | 8590456   | + | G | G |
| 16 | 72013741  | 72013741  | + | G | G |
| 1  | 160607118 | 160607118 | + | C | C |
| 6  | 167440066 | 167440066 | + | G | G |
| 3  | 157031497 | 157031497 | + | G | G |
| 10 | 3820633   | 3820633   | + | A | A |
| 11 | 46917567  | 46917567  | + | G | G |
| 16 | 81954870  | 81954870  | + | C | C |
| 11 | 65628240  | 65628240  | + | C | C |
| 17 | 36705381  | 36705381  | + | G | G |
| 7  | 107664378 | 107664378 | + | G | G |
| 18 | 61558772  | 61558772  | + | C | C |
| 6  | 28347314  | 28347314  | + | T | T |
| 4  | 843708    | 843708    | + | C | C |
| 11 | 120008626 | 120008626 | + | C | C |

|    |           |           |   |   |   |
|----|-----------|-----------|---|---|---|
| 16 | 57765217  | 57765217  | + | C | C |
| 1  | 45798476  | 45798476  | + | A | A |
| 2  | 179596191 | 179596191 | + | C | C |
| 3  | 125208299 | 125208299 | + | G | G |
| 20 | 36572547  | 36572547  | + | C | C |
| 15 | 25334027  | 25334027  | + | C | C |
| 19 | 57326065  | 57326065  | + | C | C |
| 7  | 87196174  | 87196174  | + | G | G |
| 8  | 73848771  | 73848771  | + | G | G |
| 19 | 19790380  | 19790380  | + | G | G |
| 21 | 34045776  | 34045776  | + | G | G |
| 2  | 179535890 | 179535890 | + | C | C |
| 17 | 37786256  | 37786256  | + | C | C |
| 16 | 20948130  | 20948130  | + | G | G |
| 20 | 55033873  | 55033873  | + | C | C |
| 3  | 195507151 | 195507151 | + | G | G |
| 4  | 26483618  | 26483618  | + | C | C |
| 10 | 13541788  | 13541788  | + | C | C |
| 19 | 19788756  | 19788756  | + | C | C |
| 5  | 130928097 | 130928097 | + | G | G |
| 14 | 57938096  | 57938096  | + | C | C |
| 20 | 62730145  | 62730145  | + | C | C |
| 1  | 31901860  | 31901860  | + | G | G |
| 12 | 93173064  | 93173064  | + | G | G |
| 20 | 5081454   | 5081454   | + | G | G |
| 18 | 61327937  | 61327937  | + | C | C |
| 9  | 139412267 | 139412267 | + | G | G |
| 19 | 16146810  | 16146810  | + | G | G |
| 3  | 160151514 | 160151514 | + | C | C |
| 9  | 125621177 | 125621177 | + | G | G |
| 7  | 38431555  | 38431555  | + | C | C |
| X  | 17770045  | 17770045  | + | C | C |
| 12 | 50028320  | 50028320  | + | G | G |
| 19 | 55286790  | 55286790  | + | C | C |
| 10 | 13336458  | 13336458  | + | C | C |
| 1  | 114215242 | 114215242 | + | C | C |
| 12 | 122268149 | 122268149 | + | C | C |
| 7  | 132409702 | 132409702 | + | C | C |
| 11 | 116661108 | 116661108 | + | C | C |
| 10 | 123976343 | 123976343 | + | G | G |
| 8  | 62491580  | 62491580  | + | G | G |
| 2  | 71778847  | 71778847  | + | G | G |
| 19 | 39915492  | 39915492  | + | C | C |

|    |           |           |   |   |   |
|----|-----------|-----------|---|---|---|
| 11 | 64802530  | 64802530  | + | G | G |
| 17 | 62290958  | 62290958  | + | G | G |
| 6  | 71191790  | 71191790  | + | C | C |
| 1  | 167096763 | 167096763 | + | C | C |
| X  | 114426020 | 114426020 | + | C | C |
| 12 | 47178403  | 47178403  | + | C | C |
| 10 | 95790677  | 95790677  | + | C | C |
| 15 | 57734601  | 57734601  | + | G | G |
| 16 | 1813728   | 1813728   | + | A | A |
| 15 | 40331371  | 40331371  | + | G | G |
| 12 | 119617439 | 119617439 | + | G | G |
| 17 | 77808765  | 77808765  | + | C | C |
| 5  | 146763461 | 146763461 | + | G | G |
| 2  | 217069975 | 217069975 | + | G | G |
| 6  | 24423330  | 24423330  | + | C | C |
| 5  | 143539956 | 143539956 | + | A | A |
| 4  | 1801021   | 1801021   | + | C | C |
| 1  | 228456122 | 228456122 | + | G | G |
| 8  | 24350603  | 24350603  | + | C | C |
| 12 | 117728189 | 117728189 | + | G | G |
| 11 | 10645331  | 10645331  | + | C | C |
| 6  | 55942361  | 55942361  | + | C | C |
| 9  | 139297293 | 139297293 | + | G | G |
| 3  | 189604206 | 189604206 | + | C | C |
| 1  | 103440407 | 103440407 | + | G | G |
| 11 | 124135340 | 124135340 | + | T | T |
| 17 | 3854976   | 3854976   | + | G | G |
| 12 | 73056956  | 73056956  | + | G | G |
| 21 | 45648822  | 45648822  | + | C | C |
| 3  | 137822643 | 137822643 | + | C | C |
| 10 | 20506463  | 20506463  | + | A | A |
| 5  | 16701101  | 16701101  | + | G | G |
| X  | 20044050  | 20044050  | + | G | G |
| 21 | 16338531  | 16338531  | + | T | T |
| 9  | 124089700 | 124089700 | + | C | C |
| 7  | 141767184 | 141767184 | + | C | C |
| 2  | 121744159 | 121744159 | + | G | G |
| 1  | 212273713 | 212273713 | + | C | C |
| 8  | 97332515  | 97332515  | + | G | G |
| 8  | 144789928 | 144789928 | + | C | C |
| 5  | 77590443  | 77590443  | + | G | G |
| 2  | 33442719  | 33442719  | + | C | C |
| 1  | 162353418 | 162353418 | + | G | G |

|    |           |           |   |   |   |
|----|-----------|-----------|---|---|---|
| 12 | 11546792  | 11546792  | + | G | G |
| 7  | 27142171  | 27142171  | + | C | C |
| 6  | 139203933 | 139203933 | + | G | G |
| 6  | 166826151 | 166826151 | + | G | G |
| 5  | 132534820 | 132534820 | + | C | C |
| 11 | 69625400  | 69625400  | + | G | G |
| 19 | 58880470  | 58880470  | + | C | C |
| X  | 1761810   | 1761810   | + | C | C |
| 9  | 136305499 | 136305499 | + | G | G |
| 17 | 2226317   | 2226317   | + | C | C |
| 6  | 168281117 | 168281117 | + | C | C |
| 1  | 51767633  | 51767633  | + | G | G |
| 3  | 134338085 | 134338085 | + | C | C |
| 2  | 16082918  | 16082918  | + | C | C |
| 2  | 105883952 | 105883952 | + | G | G |
| 5  | 35670235  | 35670235  | + | C | C |
| 17 | 5264648   | 5264648   | + | C | C |
| 8  | 57876502  | 57876502  | + | G | G |
| 10 | 13336457  | 13336457  | + | C | C |
| 1  | 225534223 | 225534223 | + | C | C |
| 13 | 32900697  | 32900697  | + | C | C |
| 4  | 4322474   | 4322474   | + | G | G |
| X  | 17024459  | 17024459  | + | T | T |
| 11 | 129940524 | 129940524 | + | G | G |
| 21 | 45712933  | 45712933  | + | C | C |
| 15 | 95022240  | 95022240  | + | C | C |
| 6  | 13295580  | 13295580  | + | G | G |
| 11 | 71906498  | 71906498  | + | C | C |
| 2  | 198380809 | 198380809 | + | C | C |
| 11 | 56409127  | 56409127  | + | G | G |
| 2  | 108507259 | 108507259 | + | G | G |
| 3  | 183952548 | 183952548 | + | C | C |
| 1  | 159505183 | 159505183 | + | C | C |
| 6  | 132939105 | 132939105 | + | G | G |
| 5  | 154393316 | 154393316 | + | G | G |
| 19 | 35786747  | 35786747  | + | G | G |
| 16 | 24831587  | 24831587  | + | A | A |
| 12 | 81763106  | 81763106  | + | C | C |
| 7  | 143175185 | 143175185 | + | G | G |
| 8  | 128429041 | 128429041 | + | C | C |
| 12 | 18573877  | 18573877  | + | T | T |
| X  | 117770371 | 117770371 | + | T | T |
| 19 | 7812430   | 7812430   | + | C | C |



|    |           |           |   |   |   |
|----|-----------|-----------|---|---|---|
| 1  | 203020813 | 203020813 | + | C | C |
| 3  | 110611199 | 110611199 | + | G | G |
| 6  | 29910671  | 29910671  | + | C | C |
| 1  | 156640744 | 156640744 | + | G | G |
| 8  | 99153059  | 99153059  | + | C | C |
| 9  | 127706627 | 127706627 | + | G | G |
| 14 | 22192156  | 22192156  | + | G | G |
| 1  | 16862173  | 16862173  | + | C | C |
| 22 | 45944536  | 45944536  | + | C | C |
| 14 | 100376605 | 100376605 | + | C | C |
| 17 | 25969287  | 25969287  | + | C | C |
| 17 | 38434465  | 38434465  | + | C | C |
| 3  | 89480480  | 89480480  | + | G | G |
| 11 | 58949668  | 58949668  | + | C | C |
| 22 | 23101644  | 23101644  | + | C | C |
| 1  | 110596625 | 110596625 | + | C | C |
| 12 | 86373933  | 86373933  | + | C | C |
| 1  | 172437722 | 172437722 | + | A | A |
| 6  | 33036410  | 33036410  | + | C | C |
| 17 | 37561382  | 37561382  | + | C | C |
| X  | 63444876  | 63444876  | + | G | G |
| 2  | 227942681 | 227942681 | + | C | C |
| 17 | 41907449  | 41907449  | + | G | G |
| 5  | 60188426  | 60188426  | + | T | T |
| 12 | 62783226  | 62783226  | + | C | C |
| 3  | 121305527 | 121305527 | + | C | C |
| 19 | 6670139   | 6670139   | + | G | G |
| 14 | 107183682 | 107183682 | + | C | C |
| 19 | 20728111  | 20728111  | + | G | G |
| 21 | 45712932  | 45712932  | + | C | C |
| 5  | 96079291  | 96079291  | + | C | C |
| 6  | 43111224  | 43111224  | + | G | G |
| 3  | 96706485  | 96706485  | + | G | G |
| 7  | 44530315  | 44530315  | + | C | C |
| 14 | 35343837  | 35343837  | + | G | G |
| 16 | 30545532  | 30545532  | + | G | G |
| 1  | 227235659 | 227235659 | + | C | C |
| 19 | 21910420  | 21910420  | + | A | A |
| 11 | 5663640   | 5663640   | + | G | G |
| 13 | 114780788 | 114780788 | + | C | C |
| 16 | 22446057  | 22446057  | + | C | C |
| 13 | 48807428  | 48807428  | + | C | C |
| 19 | 7591681   | 7591681   | + | A | A |

|    |           |           |   |   |   |
|----|-----------|-----------|---|---|---|
| 12 | 27179441  | 27179441  | + | A | A |
| 7  | 143792528 | 143792528 | + | G | G |
| 14 | 102494373 | 102494373 | + | C | C |
| 1  | 175067731 | 175067731 | + | G | G |
| 3  | 128840299 | 128840299 | + | C | C |
| 3  | 172365700 | 172365700 | + | C | C |
| 8  | 33449607  | 33449607  | + | C | C |
| 1  | 149761663 | 149761663 | + | G | G |
| 5  | 137673929 | 137673929 | + | G | G |
| 3  | 58255135  | 58255135  | + | G | G |
| 12 | 62783227  | 62783227  | + | C | C |
| 1  | 175336357 | 175336357 | + | C | C |
| 19 | 16146857  | 16146857  | + | C | C |
| 6  | 119228751 | 119228751 | + | T | T |
| 6  | 83880051  | 83880051  | + | G | G |
| 11 | 85630543  | 85630543  | + | C | C |
| 7  | 4825296   | 4825296   | + | C | C |
| 6  | 132694137 | 132694137 | + | C | C |
| 22 | 36650990  | 36650990  | + | C | C |
| 22 | 39817953  | 39817953  | + | C | C |
| 18 | 19997658  | 19997658  | + | C | C |
| 1  | 240072262 | 240072262 | + | G | G |
| 8  | 17885158  | 17885158  | + | C | C |
| 19 | 58698391  | 58698391  | + | C | C |
| 2  | 32368451  | 32368451  | + | C | C |
| 7  | 92733904  | 92733904  | + | C | C |
| 13 | 52686427  | 52686427  | + | C | C |
| 3  | 50141686  | 50141686  | + | C | C |
| 13 | 41703965  | 41703965  | + | A | A |
| 5  | 38490385  | 38490385  | + | G | G |
| X  | 15599411  | 15599411  | + | C | C |
| 6  | 16250514  | 16250514  | + | G | G |
| 13 | 28009592  | 28009592  | + | G | G |
| 17 | 4536526   | 4536526   | + | C | C |
| 17 | 41246008  | 41246008  | + | G | G |
| 14 | 65260323  | 65260323  | + | G | G |
| 19 | 35776015  | 35776015  | + | G | G |
| 9  | 133493236 | 133493236 | + | G | G |
| 21 | 44513268  | 44513268  | + | C | C |
| 7  | 38725437  | 38725437  | + | C | C |
| 4  | 95173814  | 95173814  | + | T | T |
| 8  | 146278264 | 146278264 | + | C | C |
| 1  | 248308997 | 248308997 | + | C | C |

|    |           |           |   |   |   |
|----|-----------|-----------|---|---|---|
| 3  | 14565210  | 14565210  | + | G | G |
| 8  | 99440397  | 99440397  | + | G | G |
| 11 | 125618662 | 125618662 | + | G | G |
| 20 | 210262    | 210262    | + | C | C |
| 20 | 3451969   | 3451969   | + | T | T |
| 3  | 51387751  | 51387751  | + | G | G |
| 20 | 42887195  | 42887195  | + | C | C |
| 6  | 35448278  | 35448278  | + | G | G |
| 18 | 28983512  | 28983512  | + | A | A |
| 15 | 54626006  | 54626006  | + | G | G |
| 17 | 56349071  | 56349071  | + | G | G |
| 2  | 16086124  | 16086124  | + | C | C |
| 9  | 78911762  | 78911762  | + | G | G |
| 12 | 75875803  | 75875803  | + | C | C |
| 17 | 40723708  | 40723708  | + | C | C |
| 19 | 54445475  | 54445475  | + | C | C |
| 19 | 47774757  | 47774757  | + | C | C |
| 5  | 153149813 | 153149813 | + | G | G |
| 2  | 1653263   | 1653263   | + | G | G |
| 9  | 130279200 | 130279200 | + | G | G |
| 17 | 39674819  | 39674819  | + | C | C |
| 11 | 60643082  | 60643082  | + | C | C |
| 5  | 179201315 | 179201315 | + | C | C |
| 16 | 88124021  | 88124021  | + | C | C |
| 1  | 40366682  | 40366682  | + | G | G |
| 7  | 6713229   | 6713229   | + | T | T |
| 11 | 70709463  | 70709463  | + | C | C |
| 7  | 100675121 | 100675121 | + | C | C |
| 5  | 7303923   | 7303923   | + | G | G |
| 7  | 1579891   | 1579891   | + | C | C |
| 2  | 183604321 | 183604321 | + | A | A |
| 20 | 43384794  | 43384794  | + | G | G |
| 2  | 61725858  | 61725858  | + | G | G |
| 2  | 11922532  | 11922532  | + | G | G |
| 16 | 4797428   | 4797428   | + | G | G |
| 3  | 129233325 | 129233325 | + | C | C |
| 1  | 228645318 | 228645318 | + | G | G |
| 7  | 140481402 | 140481402 | + | C | C |
| 12 | 11061335  | 11061335  | + | A | A |
| 18 | 55833021  | 55833021  | + | G | G |
| 7  | 141758086 | 141758086 | + | C | C |
| 16 | 31235885  | 31235885  | + | C | C |
| 10 | 97393314  | 97393314  | + | G | G |

|    |           |           |   |   |   |
|----|-----------|-----------|---|---|---|
| 14 | 70633594  | 70633594  | + | G | G |
| 1  | 179851740 | 179851740 | + | C | C |
| 2  | 51254796  | 51254796  | + | C | C |
| 8  | 102381046 | 102381046 | + | T | T |
| 7  | 133749110 | 133749110 | + | G | G |
| 5  | 147513396 | 147513396 | + | G | G |
| 2  | 202529837 | 202529837 | + | G | G |
| 8  | 26237181  | 26237181  | + | G | G |
| 12 | 120555071 | 120555071 | + | C | C |
| 18 | 42533043  | 42533043  | + | G | G |
| 11 | 1213341   | 1213341   | + | C | C |
| 2  | 210882269 | 210882269 | + | C | C |
| 10 | 85985232  | 85985232  | + | C | C |
| 21 | 45679408  | 45679408  | + | G | G |
| 3  | 195447789 | 195447789 | + | G | G |
| 6  | 17773748  | 17773748  | + | C | C |
| 7  | 143701112 | 143701112 | + | G | G |
| 16 | 347115    | 347115    | + | G | G |
| 5  | 167379799 | 167379799 | + | C | C |
| 1  | 171605184 | 171605184 | + | G | G |
| 2  | 141806564 | 141806564 | + | G | G |
| 5  | 10250762  | 10250762  | + | G | G |
| 9  | 136699454 | 136699454 | + | G | G |
| 1  | 32682688  | 32682688  | + | G | G |
| 3  | 108220605 | 108220605 | + | G | G |
| 11 | 121986685 | 121986685 | + | C | C |
| 1  | 214814724 | 214814724 | + | T | T |
| 13 | 58208429  | 58208429  | + | C | C |
| 7  | 123517263 | 123517263 | + | G | G |
| 7  | 100696625 | 100696625 | + | A | A |
| MT | 15022     | 15022     | + | C | C |
| 22 | 38120836  | 38120836  | + | C | C |
| 17 | 42168856  | 42168856  | + | G | G |
| 14 | 105614774 | 105614774 | + | G | G |
| 11 | 78775971  | 78775971  | + | A | A |
| 16 | 14761717  | 14761717  | + | C | C |
| 3  | 101241141 | 101241141 | + | G | G |
| 22 | 36698676  | 36698676  | + | G | G |
| 2  | 234113007 | 234113007 | + | G | G |
| 1  | 161192255 | 161192255 | + | C | C |
| 7  | 99128977  | 99128977  | + | C | C |
| 11 | 6129824   | 6129824   | + | G | G |
| 11 | 47283136  | 47283136  | + | C | C |

|            |           |           |   |   |   |
|------------|-----------|-----------|---|---|---|
| 5          | 156381439 | 156381439 | + | C | C |
| 20         | 57486113  | 57486113  | + | C | C |
| X          | 152736575 | 152736575 | + | G | G |
| 11         | 102272837 | 102272837 | + | G | G |
| X          | 48920224  | 48920224  | + | C | C |
| 20         | 37573608  | 37573608  | + | C | C |
| 1          | 225438401 | 225438401 | + | G | G |
| 3          | 138665465 | 138665465 | + | G | G |
| 4          | 48076070  | 48076070  | + | C | C |
| 12         | 118298123 | 118298123 | + | G | G |
| 22         | 50581506  | 50581506  | + | G | G |
| 6          | 26408144  | 26408144  | + | C | C |
| 13         | 77699528  | 77699528  | + | C | C |
| 12         | 13716879  | 13716879  | + | G | G |
| 16         | 69317984  | 69317984  | + | C | C |
| 9          | 79318828  | 79318828  | + | T | T |
| 8          | 86786357  | 86786357  | + | C | C |
| 10         | 69366807  | 69366807  | + | C | C |
| 6          | 26205200  | 26205200  | + | G | G |
| 15         | 40544528  | 40544528  | + | G | G |
| 19         | 42928305  | 42928305  | + | G | G |
| 6          | 31855893  | 31855893  | + | G | G |
| 19         | 45176029  | 45176029  | + | G | G |
| 11         | 605708    | 605708    | + | T | T |
| 3          | 38357828  | 38357828  | + | G | G |
| 18         | 56936215  | 56936215  | + | C | C |
| 19         | 37904266  | 37904266  | + | G | G |
| 1          | 215768789 | 215768789 | + | G | G |
| 17         | 48618380  | 48618380  | + | G | G |
| 2          | 48915316  | 48915316  | + | G | G |
| 16         | 84485598  | 84485598  | + | C | C |
| 7          | 142111646 | 142111646 | + | C | C |
| 16         | 23722321  | 23722321  | + | C | C |
| 8          | 86025310  | 86025310  | + | G | G |
| 3          | 150421568 | 150421568 | + | C | C |
| GL000209.1 | 118647    | 118647    | + | G | G |
| 1          | 228479731 | 228479731 | + | G | G |
| 16         | 31095929  | 31095929  | + | G | G |
| 4          | 106640665 | 106640665 | + | C | C |
| 14         | 21991100  | 21991100  | + | G | G |
| 15         | 50555458  | 50555458  | + | C | C |
| 12         | 20522522  | 20522522  | + | G | G |
| 3          | 9594200   | 9594200   | + | T | T |

|    |           |           |   |   |   |
|----|-----------|-----------|---|---|---|
| 6  | 32025970  | 32025970  | + | G | G |
| 11 | 113281632 | 113281632 | + | G | G |
| 20 | 2398003   | 2398003   | + | G | G |
| X  | 3239107   | 3239107   | + | T | T |
| 8  | 73849568  | 73849568  | + | C | C |
| 17 | 56329578  | 56329578  | + | G | G |
| 8  | 25890585  | 25890585  | + | C | C |
| 18 | 28711475  | 28711475  | + | G | G |
| 19 | 19338529  | 19338529  | + | C | C |
| 19 | 6471501   | 6471501   | + | C | C |
| 8  | 56366855  | 56366855  | + | G | G |
| 1  | 153655047 | 153655047 | + | C | C |
| 10 | 5788617   | 5788617   | + | T | T |
| 8  | 65494180  | 65494180  | + | G | G |
| 14 | 94063841  | 94063841  | + | C | C |
| 3  | 158363429 | 158363429 | + | G | G |
| 18 | 31319646  | 31319646  | + | A | A |
| 12 | 52965148  | 52965148  | + | C | C |
| 11 | 8060510   | 8060510   | + | G | G |
| 5  | 13901548  | 13901548  | + | G | G |
| 2  | 227871796 | 227871796 | + | C | C |
| 6  | 51910946  | 51910946  | + | G | G |
| 5  | 140801730 | 140801730 | + | A | A |
| X  | 34675063  | 34675063  | + | G | G |
| 9  | 140786376 | 140786376 | + | G | G |
| 18 | 19996373  | 19996373  | + | C | C |
| 3  | 36779808  | 36779808  | + | C | C |
| 17 | 11501845  | 11501845  | + | C | C |
| 6  | 109669711 | 109669711 | + | G | G |
| 6  | 152734539 | 152734539 | + | T | T |
| 9  | 99154730  | 99154730  | + | G | G |
| 1  | 169821993 | 169821993 | + | T | T |
| 10 | 105110539 | 105110539 | + | C | C |
| 15 | 92459677  | 92459677  | + | C | C |
| 19 | 9059351   | 9059351   | + | C | C |
| 2  | 152411487 | 152411487 | + | C | C |
| 3  | 121448137 | 121448137 | + | C | C |
| 1  | 185144164 | 185144164 | + | G | G |
| 10 | 52101085  | 52101085  | + | A | A |
| 7  | 142575779 | 142575779 | + | C | C |
| 12 | 95452187  | 95452187  | + | G | G |
| 17 | 38925177  | 38925177  | + | C | C |
| 11 | 65780330  | 65780330  | + | G | G |

|    |           |           |   |   |   |
|----|-----------|-----------|---|---|---|
| 2  | 48027976  | 48027976  | + | C | C |
| 1  | 207791540 | 207791540 | + | C | C |
| 16 | 71609886  | 71609886  | + | A | A |
| 1  | 74905179  | 74905179  | + | C | C |
| 7  | 124116993 | 124116993 | + | C | C |
| 10 | 102894098 | 102894098 | + | C | C |
| 11 | 9435905   | 9435905   | + | C | C |
| 13 | 101720351 | 101720351 | + | G | G |
| 6  | 32814973  | 32814973  | + | C | C |
| 1  | 193119512 | 193119512 | + | G | G |
| 13 | 31822034  | 31822034  | + | C | C |
| 13 | 36383221  | 36383221  | + | T | T |
| 7  | 107720046 | 107720046 | + | C | C |
| 15 | 34635800  | 34635800  | + | A | A |
| 19 | 15164656  | 15164656  | + | G | G |
| 17 | 79866941  | 79866941  | + | G | G |
| X  | 24766550  | 24766550  | + | A | A |
| 1  | 92941621  | 92941621  | + | G | G |
| 2  | 187516813 | 187516813 | + | C | C |
| 20 | 37634900  | 37634900  | + | G | G |
| 2  | 75109277  | 75109277  | + | G | G |
| 7  | 143141184 | 143141184 | + | G | G |
| 4  | 10445531  | 10445531  | + | T | T |
| 3  | 47888112  | 47888112  | + | T | T |
| 22 | 49834655  | 49834655  | + | G | G |
| 1  | 167096138 | 167096138 | + | G | G |
| 12 | 6631094   | 6631094   | + | G | G |
| 11 | 118376323 | 118376323 | + | C | C |
| 2  | 27746180  | 27746180  | + | C | C |
| 20 | 61162153  | 61162153  | + | G | G |
| 21 | 46951518  | 46951518  | + | G | G |
| 3  | 98299542  | 98299542  | + | C | C |
| 1  | 204966462 | 204966462 | + | A | A |
| 12 | 58135720  | 58135720  | + | G | G |
| 2  | 131674982 | 131674982 | + | G | G |
| 2  | 101581363 | 101581363 | + | C | C |
| 17 | 58121235  | 58121235  | + | G | G |
| 8  | 89086866  | 89086866  | + | C | C |
| 7  | 100086809 | 100086809 | + | G | G |
| 1  | 184692991 | 184692991 | + | C | C |
| 12 | 2783691   | 2783691   | + | C | C |
| 12 | 121104833 | 121104833 | + | G | G |
| 1  | 175348858 | 175348858 | + | T | T |

|    |           |           |   |   |   |
|----|-----------|-----------|---|---|---|
| 3  | 50141687  | 50141687  | + | C | C |
| 17 | 41597590  | 41597590  | + | G | G |
| 19 | 10252780  | 10252780  | + | A | A |
| 2  | 42275859  | 42275859  | + | G | G |
| 11 | 64607596  | 64607596  | + | G | G |
| 5  | 168175308 | 168175308 | + | G | G |
| 6  | 86351147  | 86351147  | + | T | T |
| 1  | 240656456 | 240656456 | + | G | G |
| 6  | 149395148 | 149395148 | + | C | C |
| 1  | 220356246 | 220356246 | + | C | C |
| 5  | 170669856 | 170669856 | + | G | G |
| 18 | 52551591  | 52551591  | + | C | C |
| 15 | 86205684  | 86205684  | + | G | G |
| 6  | 31827337  | 31827337  | + | G | G |
| 19 | 23159391  | 23159391  | + | G | G |
| 2  | 68511449  | 68511449  | + | C | C |
| 3  | 127411137 | 127411137 | + | G | G |
| 1  | 200978520 | 200978520 | + | C | C |
| 7  | 136701068 | 136701068 | + | G | G |
| 19 | 22379578  | 22379578  | + | A | A |
| 2  | 192273829 | 192273829 | + | G | G |
| 7  | 38501002  | 38501002  | + | C | C |
| 12 | 110344406 | 110344406 | + | C | C |
| 1  | 100602451 | 100602451 | + | G | G |
| 19 | 56373416  | 56373416  | + | C | C |
| 17 | 71233029  | 71233029  | + | C | C |
| 19 | 36360575  | 36360575  | + | G | G |
| 18 | 19997183  | 19997183  | + | C | C |
| 19 | 40151153  | 40151153  | + | G | G |
| 2  | 18766085  | 18766085  | + | C | C |
| 9  | 104433279 | 104433279 | + | G | G |
| 11 | 65767114  | 65767114  | + | C | C |
| 15 | 72105937  | 72105937  | + | G | G |
| 22 | 50703750  | 50703750  | + | C | C |
| 18 | 54814696  | 54814696  | + | T | T |
| 2  | 21230759  | 21230759  | + | G | G |
| 11 | 77835109  | 77835109  | + | G | G |
| 18 | 28662269  | 28662269  | + | C | C |
| 20 | 2473370   | 2473370   | + | C | C |
| 14 | 24511950  | 24511950  | + | C | C |
| 1  | 111862071 | 111862071 | + | C | C |
| 17 | 9792761   | 9792761   | + | G | G |
| 4  | 7783137   | 7783137   | + | G | G |



|    |           |           |   |   |   |
|----|-----------|-----------|---|---|---|
| 7  | 100086808 | 100086808 | + | G | G |
| 8  | 126044542 | 126044542 | + | G | G |
| 11 | 1094752   | 1094752   | + | C | C |
| 12 | 21689697  | 21689697  | + | G | G |
| 3  | 13612605  | 13612605  | + | C | C |
| 14 | 24898010  | 24898010  | + | G | G |
| 12 | 7074865   | 7074865   | + | T | T |
| 17 | 56384185  | 56384185  | + | G | G |
| 12 | 52886808  | 52886808  | + | G | G |
| 19 | 47778465  | 47778465  | + | C | C |
| 2  | 135630174 | 135630174 | + | C | C |
| 3  | 153840477 | 153840477 | + | C | C |
| 2  | 231103734 | 231103734 | + | G | G |
| 11 | 111384317 | 111384317 | + | C | C |
| 8  | 9620665   | 9620665   | + | C | C |
| 5  | 11565118  | 11565118  | + | G | G |
| 6  | 101037866 | 101037866 | + | G | G |
| 11 | 64854484  | 64854484  | + | C | C |
| 8  | 22451438  | 22451438  | + | C | C |
| 12 | 45457774  | 45457774  | + | G | G |
| 22 | 41623324  | 41623324  | + | G | G |
| 7  | 64023450  | 64023450  | + | A | A |
| 20 | 32883210  | 32883210  | + | C | C |
| 1  | 223945074 | 223945074 | + | C | C |
| 2  | 95538593  | 95538593  | + | A | A |
| 12 | 56622981  | 56622981  | + | G | G |
| X  | 73046861  | 73046861  | + | C | C |
| 15 | 54860039  | 54860039  | + | C | C |
| 4  | 23803392  | 23803392  | + | C | C |
| 12 | 2622123   | 2622123   | + | G | G |
| 21 | 41414529  | 41414529  | + | C | C |
| 19 | 35786746  | 35786746  | + | G | G |
| 6  | 43250747  | 43250747  | + | G | G |
| 17 | 3743454   | 3743454   | + | G | G |
| 20 | 57899515  | 57899515  | + | G | G |
| 12 | 54105923  | 54105923  | + | G | G |
| 1  | 241932751 | 241932751 | + | C | C |
| 10 | 55755238  | 55755238  | + | T | T |
| 18 | 13089540  | 13089540  | + | C | C |
| 1  | 186007984 | 186007984 | + | C | C |
| 7  | 72658318  | 72658318  | + | C | C |
| 8  | 52384822  | 52384822  | + | G | G |
| 6  | 25983639  | 25983639  | + | G | G |

|    |           |           |   |   |   |
|----|-----------|-----------|---|---|---|
| X  | 26212397  | 26212397  | + | C | C |
| 7  | 142428773 | 142428773 | + | G | G |
| 11 | 124294425 | 124294425 | + | C | C |
| 1  | 38006028  | 38006028  | + | G | G |
| 12 | 69965964  | 69965964  | + | C | C |
| 7  | 100457461 | 100457461 | + | C | C |
| 19 | 43920651  | 43920651  | + | C | C |
| 2  | 133683638 | 133683638 | + | G | G |
| 11 | 34485693  | 34485693  | + | G | G |
| 5  | 1878755   | 1878755   | + | C | C |
| 10 | 75231331  | 75231331  | + | C | C |
| 1  | 28208513  | 28208513  | + | C | C |
| 16 | 30078898  | 30078898  | + | C | C |
| 1  | 190068020 | 190068020 | + | C | C |
| 12 | 113314464 | 113314464 | + | C | C |
| 11 | 65628239  | 65628239  | + | C | C |
| 11 | 108380926 | 108380926 | + | G | G |
| 2  | 16085920  | 16085920  | + | A | A |
| 8  | 27950598  | 27950598  | + | C | C |
| 1  | 154932203 | 154932203 | + | G | G |
| 18 | 3084009   | 3084009   | + | C | C |
| 1  | 220809202 | 220809202 | + | C | C |
| 9  | 78790058  | 78790058  | + | C | C |
| 14 | 77706862  | 77706862  | + | G | G |
| 16 | 31388545  | 31388545  | + | G | G |
| 6  | 24448371  | 24448371  | + | A | A |
| 11 | 70858369  | 70858369  | + | G | G |
| 1  | 207273335 | 207273335 | + | G | G |
| 16 | 71026098  | 71026098  | + | C | C |
| 17 | 47685289  | 47685289  | + | G | G |
| 15 | 68624227  | 68624227  | + | G | G |
| 11 | 74441939  | 74441939  | + | C | C |
| 12 | 6804639   | 6804639   | + | C | C |
| 3  | 36763108  | 36763108  | + | C | C |
| 8  | 103855873 | 103855873 | + | C | C |
| 18 | 63489467  | 63489467  | + | C | C |
| 8  | 39695735  | 39695735  | + | A | A |
| 13 | 31498623  | 31498623  | + | C | C |
| 8  | 126011901 | 126011901 | + | G | G |
| 5  | 140389601 | 140389601 | + | C | C |
| 2  | 138330076 | 138330076 | + | C | C |
| 20 | 60985964  | 60985964  | + | G | G |
| 16 | 84351949  | 84351949  | + | G | G |

|    |           |           |   |   |   |
|----|-----------|-----------|---|---|---|
| 1  | 207263800 | 207263800 | + | G | G |
| 8  | 11619119  | 11619119  | + | T | T |
| 22 | 41742173  | 41742173  | + | C | C |
| 14 | 21250218  | 21250218  | + | C | C |
| 11 | 65802077  | 65802077  | + | T | T |
| 11 | 5717870   | 5717870   | + | G | G |
| 11 | 15247220  | 15247220  | + | G | G |
| X  | 71886021  | 71886021  | + | C | C |
| 8  | 49833990  | 49833990  | + | A | A |
| 5  | 120022315 | 120022315 | + | C | C |
| 2  | 179751531 | 179751531 | + | G | G |
| 7  | 142104302 | 142104302 | + | G | G |
| 14 | 106174203 | 106174203 | + | A | A |
| 12 | 50370711  | 50370711  | + | G | G |
| 17 | 11523033  | 11523033  | + | G | G |
| X  | 101097831 | 101097831 | + | C | C |
| 5  | 35955843  | 35955843  | + | C | C |
| 3  | 124141726 | 124141726 | + | C | C |
| 19 | 47935371  | 47935371  | + | C | C |
| 11 | 62296735  | 62296735  | + | G | G |
| 17 | 71282310  | 71282310  | + | G | G |
| 7  | 142498951 | 142498951 | + | G | G |
| 11 | 609667    | 609667    | + | C | C |
| 11 | 5410948   | 5410948   | + | G | G |
| 14 | 105478110 | 105478110 | + | C | C |
| 1  | 7724565   | 7724565   | + | C | C |
| 1  | 16097040  | 16097040  | + | G | G |
| 5  | 75954316  | 75954316  | + | C | C |
| 7  | 151874767 | 151874767 | + | C | C |
| X  | 104512186 | 104512186 | + | G | G |
| 7  | 128414643 | 128414643 | + | G | G |
| 7  | 99820243  | 99820243  | + | C | C |
| 6  | 55443849  | 55443849  | + | C | C |
| 16 | 71318697  | 71318697  | + | G | G |
| 11 | 4936151   | 4936151   | + | G | G |
| 7  | 136700564 | 136700564 | + | G | G |
| 19 | 7744069   | 7744069   | + | G | G |
| 20 | 1532611   | 1532611   | + | C | C |
| 5  | 57913640  | 57913640  | + | C | C |
| 2  | 170090028 | 170090028 | + | C | C |
| 11 | 113857589 | 113857589 | + | T | T |
| 3  | 38136656  | 38136656  | + | G | G |
| 17 | 18232111  | 18232111  | + | C | C |

|    |           |           |   |   |   |
|----|-----------|-----------|---|---|---|
| 2  | 136562442 | 136562442 | + | C | C |
| 17 | 5045714   | 5045714   | + | G | G |
| 11 | 62105367  | 62105367  | + | C | C |
| 1  | 153122259 | 153122259 | + | G | G |
| 2  | 219543982 | 219543982 | + | C | C |
| 9  | 77448931  | 77448931  | + | C | C |
| 21 | 47556854  | 47556854  | + | G | G |
| 2  | 98907061  | 98907061  | + | G | G |
| 11 | 65810652  | 65810652  | + | C | C |
| 11 | 4661133   | 4661133   | + | T | T |
| 7  | 31126117  | 31126117  | + | G | G |
| 13 | 41303514  | 41303514  | + | G | G |
| 6  | 47592162  | 47592162  | + | T | T |
| 13 | 103386526 | 103386526 | + | C | C |
| 5  | 151771860 | 151771860 | + | G | G |
| 14 | 102771502 | 102771502 | + | G | G |
| 13 | 24863281  | 24863281  | + | C | C |
| 3  | 14862430  | 14862430  | + | C | C |
| 22 | 39621802  | 39621802  | + | G | G |
| 22 | 25158343  | 25158343  | + | G | G |
| 5  | 52097572  | 52097572  | + | T | T |
| 15 | 91527334  | 91527334  | + | G | G |
| 3  | 54673839  | 54673839  | + | T | T |
| 22 | 17128063  | 17128063  | + | G | G |
| 18 | 3164331   | 3164331   | + | G | G |
| 2  | 25458580  | 25458580  | + | C | C |
| 15 | 41961692  | 41961692  | + | C | C |
| 17 | 38859836  | 38859836  | + | C | C |
| 8  | 103573096 | 103573096 | + | G | G |
| 1  | 236746362 | 236746362 | + | G | G |
| 16 | 23690374  | 23690374  | + | C | C |
| 3  | 134851717 | 134851717 | + | G | G |
| 6  | 31855894  | 31855894  | + | G | G |
| 11 | 7870672   | 7870672   | + | G | G |
| 11 | 62932098  | 62932098  | + | T | T |
| 15 | 98514481  | 98514481  | + | T | T |
| 11 | 605710    | 605710    | + | C | C |
| 3  | 15300367  | 15300367  | + | C | C |
| 2  | 135223788 | 135223788 | + | G | G |
| 7  | 54617869  | 54617869  | + | G | G |
| 14 | 94394946  | 94394946  | + | G | G |
| 12 | 105321882 | 105321882 | + | C | C |
| 18 | 31803275  | 31803275  | + | C | C |

|    |           |           |   |   |   |
|----|-----------|-----------|---|---|---|
| 19 | 18965977  | 18965977  | + | C | C |
| 16 | 67964630  | 67964630  | + | C | C |
| 2  | 108507258 | 108507258 | + | G | G |
| 3  | 42705772  | 42705772  | + | C | C |
| 6  | 65336082  | 65336082  | + | G | G |
| 3  | 64617157  | 64617157  | + | C | C |
| 2  | 79349265  | 79349265  | + | T | T |
| 20 | 39316756  | 39316756  | + | G | G |
| 6  | 158349734 | 158349734 | + | C | C |
| 14 | 81609792  | 81609792  | + | G | G |
| 17 | 36047326  | 36047326  | + | G | G |
| 6  | 27277429  | 27277429  | + | G | G |
| 19 | 18119261  | 18119261  | + | A | A |
| 11 | 626430    | 626430    | + | C | C |
| 6  | 42609419  | 42609419  | + | C | C |
| 1  | 54059913  | 54059913  | + | G | G |
| 16 | 820633    | 820633    | + | G | G |
| 20 | 40713425  | 40713425  | + | C | C |
| 8  | 144940719 | 144940719 | + | C | C |
| 5  | 16701102  | 16701102  | + | G | G |
| 10 | 106937871 | 106937871 | + | C | C |
| 11 | 61533475  | 61533475  | + | C | C |
| 4  | 86989010  | 86989010  | + | G | G |
| 1  | 201350926 | 201350926 | + | G | G |
| 17 | 62290957  | 62290957  | + | G | G |
| 1  | 203830825 | 203830825 | + | T | T |
| 19 | 1754205   | 1754205   | + | G | G |
| 1  | 225605722 | 225605722 | + | C | C |
| 12 | 109334584 | 109334584 | + | G | G |
| 22 | 39627801  | 39627801  | + | G | G |
| 3  | 51430747  | 51430747  | + | C | C |
| 19 | 52147175  | 52147175  | + | C | C |
| 11 | 1011445   | 1011445   | + | C | C |
| X  | 10094213  | 10094213  | + | A | A |
| 11 | 31653877  | 31653877  | + | C | C |
| 17 | 45810963  | 45810963  | + | G | G |
| X  | 3241351   | 3241351   | + | C | C |
| 5  | 9224867   | 9224867   | + | C | C |
| 20 | 43353610  | 43353610  | + | G | G |
| 17 | 32906218  | 32906218  | + | G | G |
| 19 | 46195227  | 46195227  | + | C | C |
| 15 | 85383141  | 85383141  | + | G | G |
| 15 | 41136292  | 41136292  | + | C | C |

|    |           |           |   |   |   |
|----|-----------|-----------|---|---|---|
| 17 | 17750863  | 17750863  | + | G | G |
| 3  | 137822613 | 137822613 | + | C | C |
| 5  | 180051013 | 180051013 | + | C | C |
| 20 | 8862323   | 8862323   | + | G | G |
| 12 | 18793432  | 18793432  | + | C | C |
| 1  | 207143561 | 207143561 | + | G | G |
| 6  | 167753706 | 167753706 | + | G | G |
| 11 | 93463133  | 93463133  | + | A | A |
| 14 | 24718574  | 24718574  | + | C | C |
| 2  | 43986149  | 43986149  | + | C | C |
| 13 | 76379668  | 76379668  | + | G | G |
| 22 | 23114964  | 23114964  | + | G | G |
| 5  | 139235281 | 139235281 | + | C | C |
| 12 | 56626572  | 56626572  | + | C | C |
| 11 | 125359521 | 125359521 | + | G | G |
| 10 | 75412952  | 75412952  | + | G | G |
| 1  | 55277537  | 55277537  | + | G | G |
| 17 | 66989171  | 66989171  | + | G | G |
| 6  | 107100532 | 107100532 | + | G | G |
| 5  | 179201316 | 179201316 | + | C | C |
| 2  | 202529838 | 202529838 | + | G | G |
| 3  | 126736723 | 126736723 | + | G | G |
| 5  | 140553193 | 140553193 | + | C | C |
| 2  | 220085972 | 220085972 | + | C | C |
| 1  | 27428902  | 27428902  | + | G | G |
| 8  | 73850027  | 73850027  | + | G | G |
| 1  | 44877889  | 44877889  | + | C | C |
| 21 | 15870842  | 15870842  | + | G | G |
| 11 | 60050124  | 60050124  | + | C | C |
| 7  | 129962357 | 129962357 | + | G | G |
| 10 | 81444111  | 81444111  | + | A | A |
| 2  | 113943565 | 113943565 | + | G | G |
| 12 | 9252067   | 9252067   | + | G | G |
| 17 | 43320509  | 43320509  | + | G | G |
| 19 | 2249613   | 2249613   | + | C | C |
| 17 | 6023865   | 6023865   | + | C | C |
| 6  | 138745806 | 138745806 | + | C | C |
| 19 | 30935026  | 30935026  | + | G | G |
| 14 | 53177843  | 53177843  | + | G | G |
| 1  | 230915984 | 230915984 | + | G | G |
| 6  | 80635941  | 80635941  | + | C | C |
| 7  | 137586116 | 137586116 | + | G | G |
| 5  | 115238594 | 115238594 | + | C | C |

|    |           |           |   |   |   |
|----|-----------|-----------|---|---|---|
| 6  | 64487907  | 64487907  | + | A | A |
| 20 | 43752755  | 43752755  | + | C | C |
| 2  | 219507734 | 219507734 | + | G | G |
| 16 | 70867920  | 70867920  | + | G | G |
| 11 | 4388766   | 4388766   | + | A | A |
| 10 | 15255473  | 15255473  | + | G | G |
| 5  | 148384325 | 148384325 | + | C | C |
| 13 | 24892970  | 24892970  | + | C | C |
| 19 | 51330167  | 51330167  | + | C | C |
| X  | 129306103 | 129306103 | + | G | G |
| 10 | 19820261  | 19820261  | + | G | G |
| 3  | 138417865 | 138417865 | + | C | C |
| X  | 8433551   | 8433551   | + | G | G |
| 5  | 132100002 | 132100002 | + | G | G |
| 19 | 44933111  | 44933111  | + | G | G |
| 15 | 39876582  | 39876582  | + | G | G |
| 7  | 100286271 | 100286271 | + | G | G |
| 5  | 180669140 | 180669140 | + | C | C |
| 2  | 179197377 | 179197377 | + | G | G |
| 7  | 20721179  | 20721179  | + | C | C |
| 5  | 45645612  | 45645612  | + | C | C |
| 11 | 17118741  | 17118741  | + | G | G |
| 7  | 92731176  | 92731176  | + | T | T |
| 19 | 648218    | 648218    | + | G | G |
| 15 | 42299942  | 42299942  | + | G | G |
| 1  | 151993696 | 151993696 | + | G | G |
| 15 | 34610840  | 34610840  | + | C | C |
| 19 | 58038764  | 58038764  | + | C | C |
| 19 | 9049111   | 9049111   | + | G | G |
| 1  | 237957207 | 237957207 | + | G | G |
| 11 | 56230646  | 56230646  | + | T | T |
| 2  | 228783495 | 228783495 | + | G | G |
| 17 | 11895926  | 11895926  | + | A | A |
| 1  | 171251130 | 171251130 | + | G | G |
| 2  | 179308209 | 179308209 | + | G | G |
| 15 | 85401264  | 85401264  | + | G | G |
| 17 | 39785259  | 39785259  | + | C | C |
| 5  | 140255369 | 140255369 | + | C | C |
| 8  | 105263336 | 105263336 | + | C | C |
| 9  | 131885399 | 131885399 | + | C | C |
| 3  | 4358631   | 4358631   | + | C | C |
| 14 | 92406960  | 92406960  | + | C | C |
| 19 | 43382139  | 43382139  | + | G | G |

|    |           |           |   |   |   |
|----|-----------|-----------|---|---|---|
| 7  | 36763727  | 36763727  | + | C | C |
| 4  | 166946535 | 166946535 | + | T | T |
| 16 | 5128005   | 5128005   | + | C | C |
| 1  | 155255019 | 155255019 | + | C | C |
| 22 | 32435871  | 32435871  | + | G | G |
| 13 | 29674956  | 29674956  | + | C | C |
| 19 | 4333755   | 4333755   | + | C | C |
| 5  | 72112449  | 72112449  | + | C | C |
| 2  | 132021632 | 132021632 | + | G | G |
| 5  | 24491924  | 24491924  | + | C | C |
| 22 | 21134007  | 21134007  | + | A | A |
| 3  | 56330265  | 56330265  | + | C | C |
| 10 | 76867819  | 76867819  | + | C | C |
| 7  | 143747613 | 143747613 | + | G | G |
| 6  | 71212561  | 71212561  | + | G | G |
| 11 | 1288668   | 1288668   | + | C | C |
| 20 | 30777195  | 30777195  | + | C | C |
| 10 | 120354048 | 120354048 | + | G | G |
| 6  | 43472921  | 43472921  | + | C | C |
| 3  | 121647880 | 121647880 | + | C | C |
| X  | 101096880 | 101096880 | + | G | G |
| 20 | 1298695   | 1298695   | + | C | C |
| 17 | 42745104  | 42745104  | + | C | C |
| 7  | 131895740 | 131895740 | + | G | G |
| X  | 48925015  | 48925015  | + | C | C |
| 16 | 26147219  | 26147219  | + | G | G |
| 1  | 32092401  | 32092401  | + | G | G |
| 9  | 133932468 | 133932468 | + | G | G |
| 8  | 12428305  | 12428305  | + | G | G |
| 7  | 72413752  | 72413752  | + | G | G |
| 16 | 3140618   | 3140618   | + | C | C |
| 19 | 51410097  | 51410097  | + | G | G |
| 19 | 14065192  | 14065192  | + | C | C |
| 7  | 149426346 | 149426346 | + | C | C |
| 1  | 34003115  | 34003115  | + | G | G |
| 2  | 11052840  | 11052840  | + | G | G |
| 13 | 26107423  | 26107423  | + | G | G |
| 15 | 26825473  | 26825473  | + | G | G |
| 16 | 70516019  | 70516019  | + | C | C |
| 6  | 165848762 | 165848762 | + | T | T |
| 9  | 43629277  | 43629277  | + | T | T |
| 1  | 161007664 | 161007664 | + | C | C |
| 4  | 69874693  | 69874693  | + | C | C |



|    |           |           |   |   |   |
|----|-----------|-----------|---|---|---|
| 3  | 140851073 | 140851073 | + | G | G |
| 4  | 71255507  | 71255507  | + | C | C |
| 5  | 178552115 | 178552115 | + | G | G |
| 7  | 92861655  | 92861655  | + | G | G |
| 4  | 115998003 | 115998003 | + | C | C |
| 8  | 131826339 | 131826339 | + | G | G |
| 16 | 20975981  | 20975981  | + | G | G |
| 16 | 2882148   | 2882148   | + | C | C |
| X  | 111097218 | 111097218 | + | G | G |
| 1  | 28208514  | 28208514  | + | C | C |
| 6  | 70071078  | 70071078  | + | G | G |
| 19 | 8188758   | 8188758   | + | C | C |
| 6  | 25762165  | 25762165  | + | C | C |
| 17 | 72278079  | 72278079  | + | C | C |
| 15 | 75693228  | 75693228  | + | G | G |
| 16 | 67760215  | 67760215  | + | G | G |
| 20 | 36611990  | 36611990  | + | C | C |
| 16 | 67918569  | 67918569  | + | C | C |
| 21 | 32119382  | 32119382  | + | A | A |
| 22 | 50720384  | 50720384  | + | G | G |
| 15 | 48513143  | 48513143  | + | G | G |
| X  | 135432555 | 135432555 | + | G | G |
| 5  | 13864609  | 13864609  | + | C | C |
| 4  | 105412231 | 105412231 | + | C | C |
| 10 | 73964183  | 73964183  | + | G | G |
| 17 | 48051166  | 48051166  | + | G | G |
| 2  | 131520183 | 131520183 | + | G | G |
| 2  | 170097837 | 170097837 | + | G | G |
| 22 | 46627911  | 46627911  | + | G | G |
| 10 | 403825    | 403825    | + | G | G |
| 19 | 55107936  | 55107936  | + | C | C |
| 21 | 47865244  | 47865244  | + | A | A |
| 4  | 103537805 | 103537805 | + | T | T |
| 7  | 91972518  | 91972518  | + | T | T |
| 2  | 179571308 | 179571308 | + | C | C |
| 19 | 54647468  | 54647468  | + | C | C |
| 17 | 62271047  | 62271047  | + | C | C |
| 10 | 105836143 | 105836143 | + | C | C |
| 17 | 76087596  | 76087596  | + | C | C |
| 19 | 48259126  | 48259126  | + | C | C |
| 5  | 1033519   | 1033519   | + | G | G |
| 1  | 207646216 | 207646216 | + | A | A |
| 12 | 7080017   | 7080017   | + | G | G |

|    |           |           |   |   |   |
|----|-----------|-----------|---|---|---|
| 20 | 56818659  | 56818659  | + | G | G |
| 6  | 27277323  | 27277323  | + | G | G |
| 12 | 96948552  | 96948552  | + | A | A |
| 5  | 81571069  | 81571069  | + | A | A |
| 6  | 53707000  | 53707000  | + | G | G |
| 11 | 114421855 | 114421855 | + | C | C |
| 2  | 69693486  | 69693486  | + | C | C |
| 7  | 100551602 | 100551602 | + | C | C |
| 7  | 73523283  | 73523283  | + | G | G |
| 8  | 142238337 | 142238337 | + | A | A |
| 11 | 40136530  | 40136530  | + | G | G |
| 19 | 53888140  | 53888140  | + | C | C |
| X  | 39932727  | 39932727  | + | C | C |
| 3  | 71247185  | 71247185  | + | G | G |
| 12 | 21331509  | 21331509  | + | G | G |
| 8  | 12428306  | 12428306  | + | G | G |
| 20 | 40944592  | 40944592  | + | C | C |
| 9  | 32424655  | 32424655  | + | G | G |
| 9  | 66468984  | 66468984  | + | A | A |
| 3  | 123368009 | 123368009 | + | C | C |
| 8  | 125109580 | 125109580 | + | C | C |
| 10 | 126517978 | 126517978 | + | A | A |
| 5  | 78985662  | 78985662  | + | C | C |
| 12 | 41463865  | 41463865  | + | C | C |
| 6  | 30899898  | 30899898  | + | G | G |
| 7  | 137801530 | 137801530 | + | G | G |
| 7  | 23775510  | 23775510  | + | T | T |
| 2  | 166451606 | 166451606 | + | G | G |
| 11 | 21306007  | 21306007  | + | G | G |
| 18 | 57103010  | 57103010  | + | G | G |
| 19 | 58437939  | 58437939  | + | G | G |
| 8  | 24813528  | 24813528  | + | C | C |
| 7  | 57188104  | 57188104  | + | G | G |
| 1  | 213009338 | 213009338 | + | G | G |
| 8  | 33369786  | 33369786  | + | C | C |
| 3  | 167183171 | 167183171 | + | G | G |
| 15 | 57544623  | 57544623  | + | A | A |
| 11 | 124413002 | 124413002 | + | G | G |
| 6  | 144095350 | 144095350 | + | C | C |
| 11 | 3129153   | 3129153   | + | C | C |
| 19 | 1057385   | 1057385   | + | C | C |
| 19 | 43257402  | 43257402  | + | G | G |
| 19 | 40580726  | 40580726  | + | A | A |

|            |           |           |   |   |   |
|------------|-----------|-----------|---|---|---|
| 8          | 52469422  | 52469422  | + | C | C |
| GL000219.1 | 54490     | 54490     | + | C | C |
| 6          | 85457758  | 85457758  | + | G | G |
| 16         | 55890292  | 55890292  | + | G | G |
| 19         | 9579842   | 9579842   | + | G | G |
| 7          | 100884119 | 100884119 | + | G | G |
| 1          | 148933291 | 148933291 | + | G | G |
| 9          | 71532487  | 71532487  | + | G | G |
| X          | 34961813  | 34961813  | + | G | G |
| 13         | 101184755 | 101184755 | + | G | G |
| 18         | 55996335  | 55996335  | + | C | C |
| 2          | 215818676 | 215818676 | + | C | C |
| 19         | 19460214  | 19460214  | + | G | G |
| X          | 70748433  | 70748433  | + | C | C |
| 5          | 13700980  | 13700980  | + | C | C |
| 9          | 34517351  | 34517351  | + | G | G |
| 8          | 56922622  | 56922622  | + | G | G |
| 19         | 43411128  | 43411128  | + | G | G |
| 2          | 27886907  | 27886907  | + | C | C |
| 2          | 220112916 | 220112916 | + | C | C |
| 11         | 377141    | 377141    | + | G | G |
| 3          | 47037952  | 47037952  | + | C | C |
| 1          | 227171570 | 227171570 | + | C | C |
| 1          | 213009264 | 213009264 | + | G | G |
| 11         | 62444270  | 62444270  | + | G | G |
| GL000218.1 | 53265     | 53265     | + | G | G |
| 22         | 51206184  | 51206184  | + | G | G |
| 15         | 25492497  | 25492497  | + | G | G |
| 12         | 51102230  | 51102230  | + | G | G |
| 5          | 33658334  | 33658334  | + | G | G |
| 20         | 9510538   | 9510538   | + | C | C |
| 5          | 180669141 | 180669141 | + | C | C |
| 17         | 37340098  | 37340098  | + | G | G |
| 3          | 129270093 | 129270093 | + | G | G |
| 11         | 65635772  | 65635772  | + | G | G |
| 7          | 21765471  | 21765471  | + | G | G |
| 14         | 50117063  | 50117063  | + | G | G |
| 11         | 18313531  | 18313531  | + | G | G |
| 2          | 26257436  | 26257436  | + | C | C |
| 13         | 92345723  | 92345723  | + | C | C |
| 1          | 228645399 | 228645399 | + | A | A |
| 4          | 6107434   | 6107434   | + | C | C |
| 4          | 128590294 | 128590294 | + | G | G |

|    |           |           |   |   |   |
|----|-----------|-----------|---|---|---|
| 11 | 117301724 | 117301724 | + | G | G |
| 2  | 73718448  | 73718448  | + | C | C |
| 11 | 1478255   | 1478255   | + | C | C |
| 22 | 40676090  | 40676090  | + | C | C |
| 1  | 156206095 | 156206095 | + | C | C |
| 12 | 18847938  | 18847938  | + | C | C |
| 6  | 101295952 | 101295952 | + | C | C |
| 16 | 30545534  | 30545534  | + | C | C |
| 12 | 55726174  | 55726174  | + | A | A |
| 5  | 137802959 | 137802959 | + | T | T |
| 2  | 120383204 | 120383204 | + | G | G |
| 8  | 42977434  | 42977434  | + | C | C |
| 8  | 73849569  | 73849569  | + | C | C |
| 2  | 176996139 | 176996139 | + | G | G |
| 22 | 46654310  | 46654310  | + | C | C |
| X  | 66941766  | 66941766  | + | G | G |
| 4  | 2986289   | 2986289   | + | G | G |
| 2  | 220112917 | 220112917 | + | C | C |
| 7  | 127954855 | 127954855 | + | C | C |
| 11 | 4621797   | 4621797   | + | G | G |
| 3  | 132180044 | 132180044 | + | T | T |
| 19 | 4283056   | 4283056   | + | C | C |
| 2  | 64685692  | 64685692  | + | G | G |
| 1  | 207753921 | 207753921 | + | C | C |
| 1  | 152732181 | 152732181 | + | C | C |
| 12 | 86199562  | 86199562  | + | C | C |
| 7  | 44805096  | 44805096  | + | C | C |
| 18 | 673020    | 673020    | + | G | G |
| 5  | 40853995  | 40853995  | + | C | C |
| 10 | 126370542 | 126370542 | + | G | G |
| 19 | 56274361  | 56274361  | + | C | C |
| 14 | 71109225  | 71109225  | + | G | G |
| 3  | 185200158 | 185200158 | + | G | G |
| 19 | 46326646  | 46326646  | + | A | A |
| 16 | 20329546  | 20329546  | + | T | T |
| 20 | 43930053  | 43930053  | + | C | C |
| X  | 71264452  | 71264452  | + | C | C |
| 3  | 121828120 | 121828120 | + | G | G |
| 5  | 138861252 | 138861252 | + | G | G |
| 1  | 6521339   | 6521339   | + | G | G |
| 8  | 104427381 | 104427381 | + | A | A |
| 18 | 44118295  | 44118295  | + | G | G |
| 16 | 89556960  | 89556960  | + | G | G |

|    |           |           |   |   |   |
|----|-----------|-----------|---|---|---|
| 7  | 149430738 | 149430738 | + | G | G |
| 1  | 37291215  | 37291215  | + | G | G |
| 3  | 38023512  | 38023512  | + | C | C |
| 5  | 140725297 | 140725297 | + | C | C |
| 8  | 55539366  | 55539366  | + | T | T |
| 19 | 38315246  | 38315246  | + | G | G |
| 3  | 97887735  | 97887735  | + | G | G |
| 12 | 57662740  | 57662740  | + | G | G |
| 17 | 2868834   | 2868834   | + | G | G |
| 6  | 28185997  | 28185997  | + | G | G |
| 15 | 20644476  | 20644476  | + | C | C |
| 9  | 90747461  | 90747461  | + | C | C |
| 2  | 162799302 | 162799302 | + | G | G |
| 11 | 6023920   | 6023920   | + | G | G |
| 14 | 59835527  | 59835527  | + | C | C |
| 13 | 103396738 | 103396738 | + | C | C |
| X  | 17394060  | 17394060  | + | C | C |
| 19 | 49999641  | 49999641  | + | C | C |
| 11 | 1266077   | 1266077   | + | C | C |
| 12 | 6647316   | 6647316   | + | C | C |
| 15 | 90213438  | 90213438  | + | A | A |
| 12 | 120306964 | 120306964 | + | A | A |
| 7  | 81335668  | 81335668  | + | A | A |
| 10 | 61926355  | 61926355  | + | C | C |
| 22 | 36698677  | 36698677  | + | G | G |
| 1  | 159166952 | 159166952 | + | G | G |
| 2  | 220307986 | 220307986 | + | C | C |
| 2  | 39944282  | 39944282  | + | G | G |
| 19 | 50354072  | 50354072  | + | C | C |
| 12 | 14849431  | 14849431  | + | C | C |
| 16 | 80583322  | 80583322  | + | C | C |
| 2  | 85255107  | 85255107  | + | G | G |
| 17 | 73611964  | 73611964  | + | G | G |
| 5  | 74101071  | 74101071  | + | C | C |
| 8  | 6669102   | 6669102   | + | G | G |
| 20 | 31627241  | 31627241  | + | G | G |
| 1  | 212550942 | 212550942 | + | C | C |
| 7  | 150553573 | 150553573 | + | C | C |
| 17 | 11597695  | 11597695  | + | C | C |
| 1  | 178442420 | 178442420 | + | C | C |
| 7  | 143140928 | 143140928 | + | C | C |
| 9  | 134350475 | 134350475 | + | G | G |
| 2  | 239039404 | 239039404 | + | C | C |

|            |           |           |   |   |   |
|------------|-----------|-----------|---|---|---|
| 5          | 74101059  | 74101059  | + | C | C |
| 11         | 108345534 | 108345534 | + | G | G |
| 12         | 97957681  | 97957681  | + | G | G |
| 2          | 133403772 | 133403772 | + | C | C |
| 20         | 24565507  | 24565507  | + | G | G |
| 11         | 5221880   | 5221880   | + | C | C |
| 19         | 1881458   | 1881458   | + | G | G |
| 2          | 29256410  | 29256410  | + | G | G |
| 6          | 33693244  | 33693244  | + | G | G |
| 22         | 39077956  | 39077956  | + | C | C |
| 6          | 43470527  | 43470527  | + | G | G |
| 12         | 117187930 | 117187930 | + | G | G |
| 22         | 46787696  | 46787696  | + | G | G |
| 12         | 102045105 | 102045105 | + | G | G |
| 4          | 40776355  | 40776355  | + | C | C |
| 5          | 34845610  | 34845610  | + | C | C |
| 14         | 24845520  | 24845520  | + | C | C |
| 12         | 70954573  | 70954573  | + | C | C |
| 14         | 91747570  | 91747570  | + | G | G |
| 2          | 39944283  | 39944283  | + | G | G |
| 11         | 34156825  | 34156825  | + | C | C |
| 3          | 41938413  | 41938413  | + | C | C |
| 10         | 61833899  | 61833899  | + | G | G |
| 7          | 114066575 | 114066575 | + | G | G |
| 3          | 54673787  | 54673787  | + | C | C |
| 15         | 20613775  | 20613775  | + | G | G |
| 20         | 2447774   | 2447774   | + | T | T |
| 19         | 49835521  | 49835521  | + | G | G |
| 1          | 248084322 | 248084322 | + | G | G |
| 3          | 100976389 | 100976389 | + | G | G |
| 13         | 48986341  | 48986341  | + | C | C |
| 8          | 128429040 | 128429040 | + | C | C |
| 17         | 58147094  | 58147094  | + | G | G |
| 20         | 42697581  | 42697581  | + | G | G |
| 19         | 501715    | 501715    | + | G | G |
| 7          | 87174234  | 87174234  | + | C | C |
| 5          | 137843978 | 137843978 | + | G | G |
| 6          | 109907248 | 109907248 | + | G | G |
| 19         | 48556283  | 48556283  | + | C | C |
| 2          | 21236237  | 21236237  | + | G | G |
| GL000241.1 | 22747     | 22747     | + | T | T |
| 4          | 126370686 | 126370686 | + | G | G |
| 13         | 46287544  | 46287544  | + | C | C |

|    |           |           |   |   |   |
|----|-----------|-----------|---|---|---|
| 3  | 51429308  | 51429308  | + | T | T |
| 12 | 6646890   | 6646890   | + | T | T |
| 8  | 25249455  | 25249455  | + | C | C |
| 1  | 57499082  | 57499082  | + | C | C |
| 12 | 108589759 | 108589759 | + | G | G |
| 1  | 227834331 | 227834331 | + | G | G |
| 4  | 119952494 | 119952494 | + | A | A |
| 17 | 62130310  | 62130310  | + | G | G |
| 1  | 15894370  | 15894370  | + | A | A |
| 19 | 13988211  | 13988211  | + | C | C |
| 14 | 76446976  | 76446976  | + | C | C |
| 8  | 10986270  | 10986270  | + | T | T |
| 14 | 74874554  | 74874554  | + | C | C |
| 16 | 71510024  | 71510024  | + | G | G |
| 5  | 38258792  | 38258792  | + | C | C |
| 1  | 177249716 | 177249716 | + | C | C |
| 1  | 156344446 | 156344446 | + | C | C |
| 7  | 143826883 | 143826883 | + | G | G |
| 8  | 27143738  | 27143738  | + | G | G |
| 17 | 48687257  | 48687257  | + | G | G |
| 11 | 73689486  | 73689486  | + | T | T |
| 5  | 74722248  | 74722248  | + | G | G |
| 7  | 144015559 | 144015559 | + | G | G |
| 8  | 144297295 | 144297295 | + | G | G |
| 9  | 37741025  | 37741025  | + | C | C |
| 2  | 109276133 | 109276133 | + | C | C |
| 1  | 157667220 | 157667220 | + | G | G |
| 7  | 1273287   | 1273287   | + | G | G |
| 19 | 51175292  | 51175292  | + | A | A |
| 6  | 28053519  | 28053519  | + | G | G |
| 19 | 1043831   | 1043831   | + | C | C |
| 6  | 112392700 | 112392700 | + | G | G |
| 13 | 50123599  | 50123599  | + | G | G |
| 1  | 160121853 | 160121853 | + | G | G |
| 12 | 47471366  | 47471366  | + | C | C |
| 20 | 61528238  | 61528238  | + | C | C |
| 13 | 110835366 | 110835366 | + | C | C |
| 20 | 44527206  | 44527206  | + | C | C |
| X  | 140983304 | 140983304 | + | G | G |
| 11 | 5988911   | 5988911   | + | G | G |
| 19 | 1556651   | 1556651   | + | C | C |
| 14 | 75052729  | 75052729  | + | C | C |
| 3  | 120369827 | 120369827 | + | G | G |

|    |           |           |   |   |   |
|----|-----------|-----------|---|---|---|
| 7  | 48443624  | 48443624  | + | G | G |
| 4  | 183714967 | 183714967 | + | C | C |
| 13 | 37539792  | 37539792  | + | G | G |
| 8  | 3008778   | 3008778   | + | A | A |
| 19 | 44377833  | 44377833  | + | C | C |
| 12 | 8023637   | 8023637   | + | G | G |
| 1  | 33149504  | 33149504  | + | G | G |
| 14 | 29247447  | 29247447  | + | C | C |
| 3  | 159557888 | 159557888 | + | C | C |
| 10 | 96701973  | 96701973  | + | A | A |
| 20 | 35563468  | 35563468  | + | G | G |
| 8  | 69017442  | 69017442  | + | C | C |
| 9  | 68414374  | 68414374  | + | T | T |
| 1  | 153043113 | 153043113 | + | G | G |
| 19 | 36685793  | 36685793  | + | C | C |
| 8  | 1626527   | 1626527   | + | C | C |
| 3  | 97593414  | 97593414  | + | C | C |
| 5  | 13920682  | 13920682  | + | C | C |
| 1  | 240371494 | 240371494 | + | G | G |
| 6  | 86195115  | 86195115  | + | G | G |
| 7  | 149194615 | 149194615 | + | C | C |
| 5  | 150310796 | 150310796 | + | C | C |
| 22 | 26239830  | 26239830  | + | G | G |
| 2  | 73496618  | 73496618  | + | G | G |
| 7  | 138764242 | 138764242 | + | G | G |
| 4  | 47548765  | 47548765  | + | G | G |
| 1  | 187610368 | 187610368 | + | C | C |
| 12 | 113638332 | 113638332 | + | C | C |
| 5  | 140182166 | 140182166 | + | G | G |
| 12 | 46121404  | 46121404  | + | C | C |
| 22 | 24573760  | 24573760  | + | C | C |
| 5  | 96460223  | 96460223  | + | G | G |
| 19 | 58189385  | 58189385  | + | G | G |
| 11 | 63059060  | 63059060  | + | C | C |
| X  | 104463874 | 104463874 | + | G | G |
| 12 | 104487302 | 104487302 | + | C | C |
| 11 | 48510581  | 48510581  | + | G | G |
| 11 | 7439348   | 7439348   | + | G | G |
| 4  | 185339745 | 185339745 | + | C | C |
| 1  | 248487323 | 248487323 | + | G | G |
| 1  | 155911823 | 155911823 | + | C | C |
| 2  | 210882268 | 210882268 | + | C | C |
| 7  | 103155704 | 103155704 | + | C | C |



|    |           |           |   |   |   |
|----|-----------|-----------|---|---|---|
| 7  | 48312947  | 48312947  | + | C | C |
| 19 | 6707876   | 6707876   | + | C | C |
| 19 | 37487974  | 37487974  | + | C | C |
| 19 | 39360730  | 39360730  | + | C | C |
| 15 | 72580950  | 72580950  | + | G | G |
| 19 | 52250221  | 52250221  | + | C | C |
| 16 | 2231413   | 2231413   | + | G | G |
| 19 | 54080047  | 54080047  | + | C | C |
| 12 | 6925358   | 6925358   | + | C | C |
| 8  | 27462774  | 27462774  | + | C | C |
| 1  | 24448228  | 24448228  | + | C | C |
| X  | 22095740  | 22095740  | + | C | C |
| 3  | 157031496 | 157031496 | + | G | G |
| 6  | 84563067  | 84563067  | + | C | C |
| 5  | 13901572  | 13901572  | + | G | G |
| 12 | 52825345  | 52825345  | + | G | G |
| 15 | 52161564  | 52161564  | + | A | A |
| 3  | 38951579  | 38951579  | + | G | G |
| 17 | 41907450  | 41907450  | + | G | G |
| 1  | 192993057 | 192993057 | + | G | G |
| 21 | 44474026  | 44474026  | + | C | C |
| 11 | 94180596  | 94180596  | + | G | G |
| 1  | 14107219  | 14107219  | + | C | C |
| 19 | 36430415  | 36430415  | + | C | C |
| 22 | 40080318  | 40080318  | + | C | C |
| 2  | 132201315 | 132201315 | + | G | G |
| 11 | 68029196  | 68029196  | + | G | G |
| 1  | 39950325  | 39950325  | + | C | C |
| 5  | 93721953  | 93721953  | + | G | G |
| 5  | 33881418  | 33881418  | + | C | C |
| 7  | 137237266 | 137237266 | + | C | C |
| 11 | 94112320  | 94112320  | + | G | G |
| 22 | 39908308  | 39908308  | + | C | C |
| 22 | 24919602  | 24919602  | + | G | G |
| 2  | 70441606  | 70441606  | + | G | G |
| 3  | 42727774  | 42727774  | + | G | G |
| 15 | 41870524  | 41870524  | + | G | G |
| 3  | 44286424  | 44286424  | + | C | C |
| 21 | 37617502  | 37617502  | + | C | C |
| 10 | 96987593  | 96987593  | + | G | G |
| 6  | 36652017  | 36652017  | + | G | G |
| 3  | 182987955 | 182987955 | + | C | C |
| 19 | 46303755  | 46303755  | + | G | G |

|    |           |           |   |   |   |
|----|-----------|-----------|---|---|---|
| 11 | 57461306  | 57461306  | + | C | C |
| 2  | 113993147 | 113993147 | + | G | G |
| 15 | 42019410  | 42019410  | + | C | C |
| 11 | 2325403   | 2325403   | + | C | C |
| 11 | 118390431 | 118390431 | + | C | C |
| 6  | 106959729 | 106959729 | + | C | C |
| 13 | 32376410  | 32376410  | + | G | G |
| 19 | 4512527   | 4512527   | + | C | C |
| 6  | 29760251  | 29760251  | + | C | C |
| 2  | 90044129  | 90044129  | + | G | G |
| 5  | 140614956 | 140614956 | + | C | C |
| 5  | 42804924  | 42804924  | + | G | G |
| 1  | 203188394 | 203188394 | + | G | G |
| 12 | 88383104  | 88383104  | + | C | C |
| 11 | 100227098 | 100227098 | + | G | G |
| 3  | 50415162  | 50415162  | + | C | C |
| 2  | 179588670 | 179588670 | + | G | G |
| 1  | 22211333  | 22211333  | + | G | G |
| 19 | 52249102  | 52249102  | + | C | C |
| 11 | 67076908  | 67076908  | + | T | T |
| 1  | 152084972 | 152084972 | + | C | C |
| 12 | 111099169 | 111099169 | + | G | G |
| 7  | 150163924 | 150163924 | + | C | C |
| 1  | 183109591 | 183109591 | + | C | C |
| 15 | 32450803  | 32450803  | + | C | C |
| 2  | 171262142 | 171262142 | + | A | A |
| 17 | 48697182  | 48697182  | + | C | C |
| 2  | 183640121 | 183640121 | + | C | C |
| 7  | 141830748 | 141830748 | + | G | G |
| X  | 106082590 | 106082590 | + | C | C |
| 3  | 46062685  | 46062685  | + | C | C |
| 22 | 37462022  | 37462022  | + | C | C |
| 4  | 105412232 | 105412232 | + | C | C |
| 5  | 140626289 | 140626289 | + | G | G |
| 17 | 27910021  | 27910021  | + | G | G |
| 21 | 32932350  | 32932350  | + | G | G |
| 15 | 72037455  | 72037455  | + | C | C |
| 1  | 225237926 | 225237926 | + | C | C |
| X  | 113961354 | 113961354 | + | C | C |
| 20 | 42908199  | 42908199  | + | G | G |
| 5  | 26890060  | 26890060  | + | G | G |
| 1  | 154221863 | 154221863 | + | C | C |
| 7  | 144060313 | 144060313 | + | C | C |

|    |           |           |   |   |   |
|----|-----------|-----------|---|---|---|
| 14 | 106232308 | 106232308 | + | C | C |
| 21 | 26978861  | 26978861  | + | G | G |
| 2  | 173659880 | 173659880 | + | G | G |
| 19 | 55512302  | 55512302  | + | G | G |
| 19 | 3474972   | 3474972   | + | C | C |
| 12 | 109354716 | 109354716 | + | G | G |
| 15 | 63351861  | 63351861  | + | C | C |
| 20 | 61303289  | 61303289  | + | C | C |
| 19 | 38795502  | 38795502  | + | C | C |
| 10 | 92509339  | 92509339  | + | G | G |
| 7  | 5385299   | 5385299   | + | G | G |
| 6  | 116442676 | 116442676 | + | C | C |
| 5  | 140215361 | 140215361 | + | A | A |
| 17 | 71282656  | 71282656  | + | G | G |
| 22 | 46932914  | 46932914  | + | C | C |
| 9  | 139244174 | 139244174 | + | C | C |
| 19 | 17954648  | 17954648  | + | G | G |
| 2  | 178095454 | 178095454 | + | G | G |
| 7  | 149501089 | 149501089 | + | C | C |
| 1  | 170993671 | 170993671 | + | G | G |
| 17 | 48068898  | 48068898  | + | G | G |
| 18 | 40853988  | 40853988  | + | G | G |
| 1  | 144873950 | 144873950 | + | G | G |
| 17 | 7017453   | 7017453   | + | C | C |
| 16 | 24802386  | 24802386  | + | C | C |
| 7  | 92731606  | 92731606  | + | C | C |
| 18 | 22023036  | 22023036  | + | C | C |
| 5  | 1422039   | 1422039   | + | G | G |
| 18 | 31319196  | 31319196  | + | G | G |
| 7  | 148767725 | 148767725 | + | G | G |
| 5  | 140307836 | 140307836 | + | C | C |
| 19 | 55224760  | 55224760  | + | C | C |
| 3  | 141632533 | 141632533 | + | C | C |
| 12 | 57348689  | 57348689  | + | C | C |
| 2  | 88422767  | 88422767  | + | C | C |
| 9  | 138455168 | 138455168 | + | T | T |
| 19 | 1556652   | 1556652   | + | A | A |
| 6  | 161006229 | 161006229 | + | C | C |
| 1  | 1140870   | 1140870   | + | C | C |
| 17 | 65103356  | 65103356  | + | T | T |
| 7  | 55466237  | 55466237  | + | C | C |
| 6  | 10887346  | 10887346  | + | G | G |
| 13 | 25060340  | 25060340  | + | A | A |

|    |           |           |   |   |   |
|----|-----------|-----------|---|---|---|
| 3  | 139257698 | 139257698 | + | C | C |
| 2  | 30974085  | 30974085  | + | A | A |
| 21 | 46951517  | 46951517  | + | G | G |
| 7  | 141408734 | 141408734 | + | C | C |
| 1  | 211380622 | 211380622 | + | C | C |
| 17 | 73733665  | 73733665  | + | C | C |
| 19 | 2997750   | 2997750   | + | C | C |
| 1  | 225492619 | 225492619 | + | G | G |
| 7  | 4917587   | 4917587   | + | G | G |
| 18 | 47431069  | 47431069  | + | G | G |
| 5  | 140730595 | 140730595 | + | C | C |
| 6  | 38891821  | 38891821  | + | C | C |
| 19 | 38384096  | 38384096  | + | C | C |
| 19 | 1241832   | 1241832   | + | C | C |
| 9  | 139313582 | 139313582 | + | C | C |
| 8  | 99205079  | 99205079  | + | G | G |
| 19 | 10221193  | 10221193  | + | C | C |
| X  | 9917304   | 9917304   | + | C | C |
| 14 | 74876085  | 74876085  | + | G | G |
| 1  | 176133011 | 176133011 | + | A | A |
| 2  | 10105453  | 10105453  | + | C | C |
| 11 | 124294171 | 124294171 | + | G | G |
| 2  | 141946119 | 141946119 | + | C | C |
| 20 | 32216179  | 32216179  | + | G | G |
| 19 | 47844692  | 47844692  | + | C | C |
| 3  | 126708500 | 126708500 | + | C | C |
| 15 | 89172612  | 89172612  | + | C | C |
| 3  | 99514343  | 99514343  | + | G | G |
| 1  | 111784879 | 111784879 | + | G | G |
| 16 | 87448056  | 87448056  | + | C | C |
| 7  | 76131597  | 76131597  | + | A | A |
| 8  | 135614682 | 135614682 | + | C | C |
| 19 | 13941422  | 13941422  | + | C | C |
| 3  | 123452725 | 123452725 | + | C | C |
| 7  | 31592692  | 31592692  | + | G | G |
| 7  | 92761493  | 92761493  | + | C | C |
| 10 | 35928478  | 35928478  | + | G | G |
| 5  | 150647098 | 150647098 | + | C | C |
| 12 | 6909497   | 6909497   | + | G | G |
| 19 | 57641920  | 57641920  | + | C | C |
| 8  | 126044543 | 126044543 | + | G | G |
| 5  | 140810360 | 140810360 | + | G | G |
| 14 | 23894201  | 23894201  | + | C | C |

|    |           |           |   |   |   |
|----|-----------|-----------|---|---|---|
| 16 | 70020358  | 70020358  | + | G | G |
| 20 | 57466919  | 57466919  | + | G | G |
| 11 | 2466337   | 2466337   | + | G | G |
| 2  | 209104592 | 209104592 | + | G | G |
| 13 | 29599090  | 29599090  | + | G | G |
| 10 | 105005828 | 105005828 | + | G | G |
| 5  | 179765568 | 179765568 | + | G | G |
| 5  | 156899347 | 156899347 | + | C | C |
| 6  | 41707647  | 41707647  | + | C | C |
| 16 | 70986416  | 70986416  | + | G | G |
| 12 | 80890150  | 80890150  | + | A | A |
| 7  | 76131564  | 76131564  | + | G | G |
| 13 | 99947321  | 99947321  | + | C | C |
| 19 | 7152745   | 7152745   | + | G | G |
| 20 | 5904080   | 5904080   | + | C | C |
| 17 | 45501332  | 45501332  | + | G | G |
| 8  | 124267665 | 124267665 | + | C | C |
| 4  | 74354392  | 74354392  | + | G | G |
| 4  | 52779712  | 52779712  | + | G | G |
| 19 | 6904122   | 6904122   | + | G | G |
| 19 | 37678109  | 37678109  | + | G | G |
| 21 | 41385161  | 41385161  | + | G | G |
| 5  | 133482076 | 133482076 | + | C | C |
| 10 | 115406775 | 115406775 | + | C | C |
| 16 | 2373555   | 2373555   | + | C | C |
| 8  | 113293473 | 113293473 | + | G | G |
| 19 | 9061494   | 9061494   | + | C | C |
| 2  | 139429022 | 139429022 | + | C | C |
| Y  | 14889960  | 14889960  | + | C | C |
| 14 | 55818555  | 55818555  | + | T | T |
| 4  | 156847068 | 156847068 | + | C | C |
| 6  | 31773895  | 31773895  | + | G | G |
| 2  | 21242612  | 21242612  | + | C | C |
| 3  | 9787276   | 9787276   | + | G | G |
| X  | 155171607 | 155171607 | + | A | A |
| 6  | 167717600 | 167717600 | + | C | C |
| 19 | 52870170  | 52870170  | + | C | C |
| 10 | 102766338 | 102766338 | + | C | C |
| 22 | 46931362  | 46931362  | + | G | G |
| 2  | 74274688  | 74274688  | + | C | C |
| 5  | 36049417  | 36049417  | + | G | G |
| 12 | 58014120  | 58014120  | + | C | C |
| 17 | 73484891  | 73484891  | + | C | C |

|    |           |           |   |   |   |
|----|-----------|-----------|---|---|---|
| X  | 130412699 | 130412699 | + | C | C |
| 20 | 50407408  | 50407408  | + | C | C |
| 11 | 40136551  | 40136551  | + | G | G |
| 1  | 152193488 | 152193488 | + | C | C |
| 3  | 126224818 | 126224818 | + | G | G |
| 5  | 109103269 | 109103269 | + | C | C |
| 20 | 48479544  | 48479544  | + | C | C |
| 7  | 48965213  | 48965213  | + | G | G |
| 12 | 47168933  | 47168933  | + | G | G |
| 1  | 159166700 | 159166700 | + | G | G |
| 8  | 21926979  | 21926979  | + | C | C |
| 10 | 50857678  | 50857678  | + | C | C |
| 3  | 52858534  | 52858534  | + | G | G |
| 7  | 63538758  | 63538758  | + | G | G |
| 16 | 50104137  | 50104137  | + | G | G |
| 1  | 100624884 | 100624884 | + | C | C |
| 12 | 18872563  | 18872563  | + | C | C |
| 15 | 75499628  | 75499628  | + | C | C |
| 12 | 56626549  | 56626549  | + | G | G |
| 18 | 59954678  | 59954678  | + | C | C |
| 1  | 70505252  | 70505252  | + | G | G |
| 8  | 94748597  | 94748597  | + | C | C |
| 5  | 40950092  | 40950092  | + | G | G |
| 20 | 334113    | 334113    | + | C | C |
| 11 | 9171711   | 9171711   | + | G | G |
| 18 | 29410669  | 29410669  | + | A | A |
| 5  | 148730873 | 148730873 | + | C | C |
| 2  | 179526540 | 179526540 | + | C | C |
| 1  | 238090463 | 238090463 | + | C | C |
| 5  | 161300146 | 161300146 | + | C | C |
| 11 | 7982690   | 7982690   | + | C | C |
| 20 | 33329102  | 33329102  | + | G | G |
| X  | 46918291  | 46918291  | + | C | C |
| 19 | 19369424  | 19369424  | + | C | C |
| 4  | 177100686 | 177100686 | + | C | C |
| 19 | 49658398  | 49658398  | + | C | C |
| 6  | 33169119  | 33169119  | + | G | G |
| 19 | 758640    | 758640    | + | G | G |
| 1  | 53122673  | 53122673  | + | C | C |
| X  | 134947928 | 134947928 | + | C | C |
| 19 | 7794993   | 7794993   | + | G | G |
| 1  | 158606481 | 158606481 | + | T | T |
| 7  | 33423349  | 33423349  | + | C | C |

|    |           |           |   |   |   |
|----|-----------|-----------|---|---|---|
| 2  | 159107377 | 159107377 | + | C | C |
| 8  | 142500296 | 142500296 | + | C | C |
| 1  | 112304941 | 112304941 | + | C | C |
| X  | 117742277 | 117742277 | + | G | G |
| 4  | 115997801 | 115997801 | + | A | A |
| 8  | 109796543 | 109796543 | + | C | C |
| 9  | 37746005  | 37746005  | + | G | G |
| 1  | 160784414 | 160784414 | + | G | G |
| 4  | 119948253 | 119948253 | + | G | G |
| 1  | 226551687 | 226551687 | + | G | G |
| 6  | 130762527 | 130762527 | + | G | G |
| 1  | 212560392 | 212560392 | + | G | G |
| 1  | 7887577   | 7887577   | + | C | C |
| 16 | 24202549  | 24202549  | + | G | G |
| 5  | 45262175  | 45262175  | + | G | G |
| 8  | 144103026 | 144103026 | + | C | C |
| 1  | 248637394 | 248637394 | + | C | C |
| 1  | 3512008   | 3512008   | + | G | G |
| 4  | 158262490 | 158262490 | + | A | A |
| 13 | 111532050 | 111532050 | + | G | G |
| 6  | 42851275  | 42851275  | + | C | C |
| 11 | 10582281  | 10582281  | + | G | G |
| X  | 152225667 | 152225667 | + | G | G |
| 1  | 38006243  | 38006243  | + | G | G |
| 1  | 32627551  | 32627551  | + | C | C |
| 12 | 70070785  | 70070785  | + | G | G |
| 9  | 72130969  | 72130969  | + | G | G |
| 5  | 156390205 | 156390205 | + | G | G |
| 1  | 115256529 | 115256529 | + | T | T |
| 17 | 31350955  | 31350955  | + | A | A |
| 10 | 122273422 | 122273422 | + | G | G |
| 5  | 176005523 | 176005523 | + | G | G |
| 14 | 59798144  | 59798144  | + | C | C |
| 17 | 71165390  | 71165390  | + | C | C |
| 19 | 38229581  | 38229581  | + | G | G |
| X  | 57405110  | 57405110  | + | C | C |
| 11 | 57381939  | 57381939  | + | C | C |
| 2  | 165946698 | 165946698 | + | C | C |
| 18 | 51888143  | 51888143  | + | T | T |
| 2  | 88890404  | 88890404  | + | C | C |
| 17 | 43545887  | 43545887  | + | G | G |
| 4  | 69512731  | 69512731  | + | G | G |
| 11 | 102667797 | 102667797 | + | G | G |

|            |           |           |   |   |   |
|------------|-----------|-----------|---|---|---|
| 8          | 77618767  | 77618767  | + | C | C |
| 1          | 23842941  | 23842941  | + | C | C |
| 4          | 186425697 | 186425697 | + | C | C |
| 2          | 1241726   | 1241726   | + | C | C |
| 1          | 99771847  | 99771847  | + | C | C |
| 9          | 21201975  | 21201975  | + | C | C |
| 2          | 175624354 | 175624354 | + | G | G |
| X          | 154290252 | 154290252 | + | C | C |
| 11         | 44096166  | 44096166  | + | C | C |
| 1          | 184764448 | 184764448 | + | C | C |
| 11         | 58190463  | 58190463  | + | G | G |
| 2          | 112863633 | 112863633 | + | C | C |
| 11         | 56468109  | 56468109  | + | G | G |
| 2          | 103281630 | 103281630 | + | C | C |
| 3          | 38913125  | 38913125  | + | G | G |
| 5          | 147888956 | 147888956 | + | G | G |
| 19         | 56320670  | 56320670  | + | G | G |
| 1          | 240070810 | 240070810 | + | G | G |
| 19         | 15882065  | 15882065  | + | C | C |
| 22         | 38245389  | 38245389  | + | C | C |
| 1          | 10166336  | 10166336  | + | C | C |
| 18         | 5291578   | 5291578   | + | A | A |
| 17         | 1554486   | 1554486   | + | C | C |
| 6          | 160874731 | 160874731 | + | C | C |
| 13         | 46050463  | 46050463  | + | G | G |
| 1          | 2938938   | 2938938   | + | G | G |
| 15         | 25463892  | 25463892  | + | C | C |
| 18         | 47480740  | 47480740  | + | G | G |
| X          | 154157443 | 154157443 | + | T | T |
| 22         | 18844837  | 18844837  | + | G | G |
| 1          | 236727922 | 236727922 | + | G | G |
| 11         | 5142837   | 5142837   | + | G | G |
| 15         | 43748405  | 43748405  | + | G | G |
| 7          | 11676541  | 11676541  | + | G | G |
| 11         | 59282739  | 59282739  | + | G | G |
| 17         | 79954428  | 79954428  | + | C | C |
| 12         | 100904616 | 100904616 | + | C | C |
| 22         | 30857641  | 30857641  | + | C | C |
| 1          | 44447453  | 44447453  | + | C | C |
| GL000194.1 | 68313     | 68313     | + | T | T |
| 12         | 123477202 | 123477202 | + | G | G |
| 4          | 38776692  | 38776692  | + | A | A |
| 11         | 69978066  | 69978066  | + | C | C |



|    |           |           |   |   |   |
|----|-----------|-----------|---|---|---|
| 8  | 71068364  | 71068364  | + | G | G |
| 5  | 55081299  | 55081299  | + | G | G |
| 16 | 76482806  | 76482806  | + | C | C |
| 21 | 45817712  | 45817712  | + | C | C |
| 19 | 9047735   | 9047735   | + | G | G |
| X  | 109764495 | 109764495 | + | C | C |
| 1  | 21106863  | 21106863  | + | A | A |
| 16 | 71026055  | 71026055  | + | G | G |
| X  | 78426792  | 78426792  | + | C | C |
| 14 | 35409471  | 35409471  | + | G | G |
| 18 | 31326183  | 31326183  | + | C | C |
| 12 | 2764402   | 2764402   | + | C | C |
| 3  | 19575181  | 19575181  | + | C | C |
| 17 | 38027044  | 38027044  | + | G | G |
| 19 | 7806713   | 7806713   | + | G | G |
| 2  | 234591010 | 234591010 | + | G | G |
| 3  | 126071454 | 126071454 | + | G | G |
| 6  | 42937493  | 42937493  | + | G | G |
| 10 | 95111581  | 95111581  | + | G | G |
| 3  | 111426917 | 111426917 | + | G | G |
| 1  | 57480916  | 57480916  | + | G | G |
| 15 | 72639094  | 72639094  | + | G | G |
| 19 | 53484150  | 53484150  | + | G | G |
| 15 | 24923191  | 24923191  | + | G | G |
| 14 | 36008772  | 36008772  | + | G | G |
| 3  | 48622201  | 48622201  | + | C | C |
| 6  | 84366474  | 84366474  | + | G | G |
| 3  | 151165740 | 151165740 | + | C | C |
| 12 | 70004332  | 70004332  | + | G | G |
| 1  | 21890613  | 21890613  | + | G | G |
| 9  | 35045119  | 35045119  | + | G | G |
| 20 | 60740521  | 60740521  | + | G | G |
| 10 | 50227680  | 50227680  | + | G | G |
| X  | 13754689  | 13754689  | + | C | C |
| 1  | 235901744 | 235901744 | + | G | G |
| 3  | 58106991  | 58106991  | + | G | G |
| 17 | 58286158  | 58286158  | + | G | G |
| X  | 73962795  | 73962795  | + | G | G |
| 17 | 7919278   | 7919278   | + | G | G |
| 11 | 47834556  | 47834556  | + | G | G |
| 11 | 55065578  | 55065578  | + | C | C |
| 19 | 30503318  | 30503318  | + | G | G |
| 11 | 4870163   | 4870163   | + | G | G |

|    |           |           |   |   |   |
|----|-----------|-----------|---|---|---|
| 11 | 123777273 | 123777273 | + | G | G |
| 14 | 103404727 | 103404727 | + | C | C |
| 12 | 68553470  | 68553470  | + | T | T |
| 8  | 100791183 | 100791183 | + | T | T |
| 14 | 107283043 | 107283043 | + | C | C |
| 19 | 55264019  | 55264019  | + | G | G |
| 12 | 109959286 | 109959286 | + | C | C |
| 1  | 9005979   | 9005979   | + | C | C |
| 12 | 13028826  | 13028826  | + | G | G |
| 5  | 55083794  | 55083794  | + | C | C |
| 17 | 34266316  | 34266316  | + | G | G |
| 20 | 31606606  | 31606606  | + | A | A |
| 6  | 31085232  | 31085232  | + | G | G |
| 9  | 37020793  | 37020793  | + | C | C |
| 8  | 8176141   | 8176141   | + | G | G |
| 17 | 57139957  | 57139957  | + | C | C |
| 15 | 52497392  | 52497392  | + | G | G |
| 7  | 117864899 | 117864899 | + | C | C |
| 8  | 113349934 | 113349934 | + | G | G |
| 1  | 38227392  | 38227392  | + | C | C |
| 14 | 107282742 | 107282742 | + | C | C |
| 9  | 26905462  | 26905462  | + | G | G |
| 6  | 30954557  | 30954557  | + | C | C |
| 11 | 119155913 | 119155913 | + | C | C |
| 1  | 158263252 | 158263252 | + | C | C |
| 15 | 78473220  | 78473220  | + | C | C |
| X  | 16761838  | 16761838  | + | C | C |
| 15 | 28519503  | 28519503  | + | G | G |
| 3  | 32933261  | 32933261  | + | C | C |
| 17 | 38027758  | 38027758  | + | G | G |
| 8  | 24339764  | 24339764  | + | C | C |
| 19 | 56423529  | 56423529  | + | C | C |
| 14 | 45501552  | 45501552  | + | C | C |
| 11 | 62346256  | 62346256  | + | C | C |
| 6  | 10928651  | 10928651  | + | C | C |
| 11 | 59596917  | 59596917  | + | C | C |
| 1  | 148932910 | 148932910 | + | C | C |
| 12 | 53693654  | 53693654  | + | C | C |
| 12 | 117723946 | 117723946 | + | G | G |
| 9  | 139612052 | 139612052 | + | C | C |
| X  | 76937587  | 76937587  | + | G | G |
| 1  | 94543433  | 94543433  | + | C | C |
| 11 | 6541421   | 6541421   | + | C | C |

|    |           |           |   |   |   |
|----|-----------|-----------|---|---|---|
| 6  | 32011584  | 32011584  | + | G | G |
| 7  | 6791167   | 6791167   | + | G | G |
| 1  | 89730384  | 89730384  | + | G | G |
| X  | 90691004  | 90691004  | + | G | G |
| 7  | 26400637  | 26400637  | + | G | G |
| 19 | 46094654  | 46094654  | + | C | C |
| 4  | 70066181  | 70066181  | + | C | C |
| 6  | 133849883 | 133849883 | + | G | G |
| 11 | 5878603   | 5878603   | + | G | G |
| 2  | 167159672 | 167159672 | + | G | G |
| X  | 129201037 | 129201037 | + | C | C |
| 17 | 28004719  | 28004719  | + | C | C |
| 11 | 56020156  | 56020156  | + | C | C |
| X  | 141290960 | 141290960 | + | C | C |
| 15 | 82575074  | 82575074  | + | C | C |
| 11 | 60482586  | 60482586  | + | G | G |
| 15 | 77450887  | 77450887  | + | G | G |
| X  | 3030580   | 3030580   | + | C | C |
| 2  | 102957264 | 102957264 | + | G | G |
| 17 | 33475421  | 33475421  | + | C | C |
| 4  | 83424080  | 83424080  | + | C | C |
| 3  | 100373797 | 100373797 | + | G | G |
| 5  | 134079737 | 134079737 | + | C | C |
| 11 | 116661467 | 116661467 | + | C | C |
| 8  | 144103025 | 144103025 | + | C | C |
| X  | 48624282  | 48624282  | + | C | C |
| 7  | 47408183  | 47408183  | + | G | G |
| 14 | 28734231  | 28734231  | + | C | C |
| X  | 149613749 | 149613749 | + | T | T |
| 7  | 86468897  | 86468897  | + | T | T |
| 1  | 248344088 | 248344088 | + | C | C |
| 18 | 46287907  | 46287907  | + | C | C |
| 5  | 148730872 | 148730872 | + | C | C |
| 8  | 8176547   | 8176547   | + | G | G |
| 5  | 149460506 | 149460506 | + | C | C |
| 22 | 37407283  | 37407283  | + | C | C |
| 12 | 7548998   | 7548998   | + | C | C |
| 1  | 247751809 | 247751809 | + | C | C |
| X  | 75651305  | 75651305  | + | C | C |
| 3  | 46016834  | 46016834  | + | G | G |
| 5  | 40835376  | 40835376  | + | C | C |
| 4  | 20597372  | 20597372  | + | G | G |
| 19 | 46971680  | 46971680  | + | C | C |

|            |           |           |   |   |   |
|------------|-----------|-----------|---|---|---|
| 19         | 8563993   | 8563993   | + | G | G |
| 5          | 140966672 | 140966672 | + | G | G |
| 21         | 47686098  | 47686098  | + | G | G |
| 1          | 233297029 | 233297029 | + | G | G |
| 19         | 9087250   | 9087250   | + | C | C |
| 3          | 101060555 | 101060555 | + | G | G |
| 1          | 240071144 | 240071144 | + | G | G |
| 2          | 233103297 | 233103297 | + | G | G |
| 17         | 19286593  | 19286593  | + | C | C |
| 12         | 79685906  | 79685906  | + | A | A |
| 22         | 20779730  | 20779730  | + | G | G |
| 19         | 56953336  | 56953336  | + | G | G |
| 5          | 132736616 | 132736616 | + | G | G |
| 2          | 99253026  | 99253026  | + | G | G |
| 4          | 162463778 | 162463778 | + | C | C |
| 1          | 207646137 | 207646137 | + | C | C |
| 19         | 46324727  | 46324727  | + | G | G |
| 8          | 69015872  | 69015872  | + | C | C |
| X          | 153421981 | 153421981 | + | C | C |
| X          | 64743994  | 64743994  | + | G | G |
| 7          | 143826368 | 143826368 | + | C | C |
| 12         | 101493391 | 101493391 | + | G | G |
| GL000209.1 | 62479     | 62479     | + | C | C |
| 4          | 126370525 | 126370525 | + | C | C |
| 19         | 43382168  | 43382168  | + | G | G |
| 5          | 140501969 | 140501969 | + | C | C |
| 11         | 1025255   | 1025255   | + | G | G |
| 11         | 61563659  | 61563659  | + | C | C |
| X          | 129543258 | 129543258 | + | C | C |
| 5          | 169141077 | 169141077 | + | C | C |
| 12         | 49438604  | 49438604  | + | G | G |
| 10         | 102054398 | 102054398 | + | C | C |
| 16         | 55613057  | 55613057  | + | G | G |
| X          | 45011085  | 45011085  | + | C | C |
| 5          | 60083201  | 60083201  | + | C | C |
| 17         | 41008646  | 41008646  | + | G | G |
| 11         | 48328011  | 48328011  | + | G | G |
| 5          | 140168122 | 140168122 | + | G | G |
| 16         | 84271078  | 84271078  | + | G | G |
| 20         | 56140497  | 56140497  | + | G | G |
| 8          | 114449213 | 114449213 | + | A | A |
| 1          | 64624681  | 64624681  | + | G | G |
| 16         | 2331421   | 2331421   | + | G | G |

|    |           |           |   |   |   |
|----|-----------|-----------|---|---|---|
| 14 | 91360716  | 91360716  | + | G | G |
| 1  | 171080110 | 171080110 | + | G | G |
| 18 | 70417524  | 70417524  | + | G | G |
| 19 | 44222808  | 44222808  | + | C | C |
| 16 | 57762381  | 57762381  | + | C | C |
| 19 | 9730212   | 9730212   | + | G | G |
| 12 | 117653054 | 117653054 | + | G | G |
| 17 | 48543138  | 48543138  | + | C | C |
| X  | 140994718 | 140994718 | + | C | C |
| 17 | 43545886  | 43545886  | + | G | G |
| 1  | 247588792 | 247588792 | + | T | T |
| X  | 148072986 | 148072986 | + | C | C |
| 8  | 66988935  | 66988935  | + | G | G |
| 20 | 58533729  | 58533729  | + | T | T |
| 11 | 64622827  | 64622827  | + | G | G |
| 3  | 38753690  | 38753690  | + | C | C |
| 14 | 99642195  | 99642195  | + | G | G |
| 10 | 124594356 | 124594356 | + | C | C |
| 22 | 42071009  | 42071009  | + | G | G |
| 11 | 124765445 | 124765445 | + | C | C |
| 10 | 135369475 | 135369475 | + | C | C |
| 8  | 24251586  | 24251586  | + | C | C |
| 7  | 49815075  | 49815075  | + | C | C |
| 7  | 143141025 | 143141025 | + | C | C |
| 5  | 140719626 | 140719626 | + | G | G |
| 2  | 241979818 | 241979818 | + | C | C |
| 17 | 65052260  | 65052260  | + | C | C |
| 2  | 120362452 | 120362452 | + | G | G |
| 7  | 86394382  | 86394382  | + | C | C |
| 20 | 31984683  | 31984683  | + | G | G |
| X  | 26178726  | 26178726  | + | G | G |
| 19 | 30503317  | 30503317  | + | G | G |
| 11 | 7960482   | 7960482   | + | C | C |
| X  | 20030497  | 20030497  | + | G | G |
| 7  | 143806907 | 143806907 | + | C | C |
| 5  | 54405879  | 54405879  | + | G | G |
| 14 | 100847559 | 100847559 | + | G | G |
| 1  | 157737182 | 157737182 | + | A | A |
| 6  | 100841642 | 100841642 | + | C | C |
| 1  | 190067047 | 190067047 | + | A | A |
| 5  | 111066441 | 111066441 | + | G | G |
| 7  | 30963619  | 30963619  | + | C | C |
| 3  | 94890879  | 94890879  | + | G | G |

|    |           |           |   |   |   |
|----|-----------|-----------|---|---|---|
| 11 | 69978139  | 69978139  | + | C | C |
| 14 | 22466423  | 22466423  | + | G | G |
| 3  | 141499626 | 141499626 | + | G | G |
| X  | 117819749 | 117819749 | + | C | C |
| 15 | 56161812  | 56161812  | + | C | C |
| 11 | 62010926  | 62010926  | + | G | G |
| 19 | 22939902  | 22939902  | + | G | G |
| 7  | 142881017 | 142881017 | + | C | C |
| 8  | 30560613  | 30560613  | + | G | G |
| 5  | 125939611 | 125939611 | + | C | C |
| 12 | 49438547  | 49438547  | + | T | T |
| 19 | 50781380  | 50781380  | + | C | C |
| 6  | 43413390  | 43413390  | + | C | C |
| 19 | 57328712  | 57328712  | + | A | A |
| 20 | 23804595  | 23804595  | + | G | G |
| 15 | 86125067  | 86125067  | + | G | G |
| 20 | 57829203  | 57829203  | + | C | C |
| 1  | 17557156  | 17557156  | + | C | C |
| 3  | 27243959  | 27243959  | + | G | G |
| 2  | 238275493 | 238275493 | + | C | C |
| 3  | 38739262  | 38739262  | + | C | C |
| 2  | 53943748  | 53943748  | + | C | C |
| 20 | 33421668  | 33421668  | + | C | C |
| 11 | 55579753  | 55579753  | + | G | G |
| X  | 154158405 | 154158405 | + | C | C |
| 3  | 58107181  | 58107181  | + | C | C |
| 6  | 35765003  | 35765003  | + | G | G |
| 17 | 27066181  | 27066181  | + | C | C |
| 20 | 61511886  | 61511886  | + | G | G |
| 12 | 58135900  | 58135900  | + | G | G |
| 12 | 111336789 | 111336789 | + | G | G |
| 9  | 5923250   | 5923250   | + | C | C |
| 19 | 44590019  | 44590019  | + | C | C |
| 20 | 6075618   | 6075618   | + | G | G |
| 13 | 46357876  | 46357876  | + | G | G |
| 4  | 3451122   | 3451122   | + | C | C |
| 5  | 150946028 | 150946028 | + | G | G |
| 6  | 7986876   | 7986876   | + | C | C |
| 3  | 156742614 | 156742614 | + | C | C |
| 11 | 99715682  | 99715682  | + | C | C |
| 5  | 140725839 | 140725839 | + | C | C |
| 10 | 96535151  | 96535151  | + | C | C |
| 13 | 19412905  | 19412905  | + | C | C |

|    |           |           |   |   |   |
|----|-----------|-----------|---|---|---|
| 7  | 137792285 | 137792285 | + | C | C |
| X  | 43628641  | 43628641  | + | C | C |
| 4  | 54231417  | 54231417  | + | C | C |
| 10 | 134648242 | 134648242 | + | G | G |
| 10 | 27692213  | 27692213  | + | C | C |
| 19 | 57347428  | 57347428  | + | C | C |
| 2  | 65540553  | 65540553  | + | G | G |
| 1  | 32829725  | 32829725  | + | G | G |
| 1  | 120336884 | 120336884 | + | C | C |
| 5  | 79031036  | 79031036  | + | G | G |
| X  | 151092640 | 151092640 | + | G | G |
| 18 | 46287906  | 46287906  | + | C | C |
| 15 | 40849599  | 40849599  | + | G | G |
| 21 | 41684075  | 41684075  | + | C | C |
| 5  | 135228075 | 135228075 | + | C | C |
| 8  | 38275843  | 38275843  | + | G | G |
| 20 | 44171421  | 44171421  | + | G | G |
| 11 | 26552866  | 26552866  | + | C | C |
| 22 | 24659631  | 24659631  | + | C | C |
| 20 | 36149667  | 36149667  | + | G | G |
| 1  | 159683518 | 159683518 | + | C | C |
| 8  | 110451278 | 110451278 | + | G | G |
| 19 | 52380602  | 52380602  | + | G | G |
| 19 | 35523480  | 35523480  | + | C | C |
| 19 | 51378101  | 51378101  | + | C | C |
| 17 | 21904069  | 21904069  | + | C | C |
| 3  | 160219827 | 160219827 | + | T | T |
| 9  | 38572148  | 38572148  | + | G | G |
| 6  | 30569825  | 30569825  | + | G | G |
| 22 | 26159258  | 26159258  | + | C | C |
| X  | 48549500  | 48549500  | + | G | G |
| 3  | 10291172  | 10291172  | + | C | C |
| 7  | 82543856  | 82543856  | + | C | C |
| 2  | 217285175 | 217285175 | + | C | C |
| 12 | 51685417  | 51685417  | + | G | G |
| 1  | 21903031  | 21903031  | + | G | G |
| X  | 150349217 | 150349217 | + | C | C |
| 8  | 134225385 | 134225385 | + | A | A |
| X  | 50053282  | 50053282  | + | G | G |
| 4  | 170506613 | 170506613 | + | G | G |
| 14 | 88892740  | 88892740  | + | C | C |
| 15 | 86125068  | 86125068  | + | G | G |
| 8  | 57219300  | 57219300  | + | C | C |

|    |           |           |   |   |   |
|----|-----------|-----------|---|---|---|
| 19 | 55539230  | 55539230  | + | C | C |
| 14 | 24550480  | 24550480  | + | G | G |
| 8  | 1857634   | 1857634   | + | C | C |
| 2  | 230253045 | 230253045 | + | C | C |
| 12 | 117693816 | 117693816 | + | G | G |
| 11 | 5776828   | 5776828   | + | A | A |
| 16 | 88722587  | 88722587  | + | C | C |
| 6  | 55922540  | 55922540  | + | G | G |
| 3  | 124053179 | 124053179 | + | C | C |
| 1  | 75037844  | 75037844  | + | C | C |
| 3  | 186370300 | 186370300 | + | C | C |
| 8  | 3205626   | 3205626   | + | G | G |
| 15 | 79059325  | 79059325  | + | G | G |
| 2  | 26698245  | 26698245  | + | G | G |
| 1  | 97658630  | 97658630  | + | C | C |
| 17 | 37296082  | 37296082  | + | T | T |
| 17 | 28935502  | 28935502  | + | C | C |
| 16 | 29675376  | 29675376  | + | C | C |
| 2  | 208986386 | 208986386 | + | G | G |
| 6  | 29797630  | 29797630  | + | C | C |
| 3  | 27243960  | 27243960  | + | G | G |
| X  | 65242288  | 65242288  | + | G | G |
| 3  | 1415299   | 1415299   | + | C | C |
| 18 | 12985328  | 12985328  | + | C | C |
| 7  | 35131475  | 35131475  | + | C | C |
| 11 | 40136550  | 40136550  | + | G | G |
| 2  | 228855721 | 228855721 | + | C | C |
| 7  | 21640450  | 21640450  | + | C | C |
| 4  | 146823822 | 146823822 | + | A | A |
| 19 | 51958791  | 51958791  | + | C | C |
| 5  | 140616151 | 140616151 | + | G | G |
| 5  | 50689502  | 50689502  | + | G | G |
| 15 | 40558176  | 40558176  | + | C | C |
| 1  | 248487200 | 248487200 | + | G | G |
| 7  | 141800646 | 141800646 | + | G | G |
| 1  | 57257937  | 57257937  | + | C | C |
| 14 | 22133545  | 22133545  | + | G | G |
| 19 | 44571056  | 44571056  | + | C | C |
| 12 | 57850114  | 57850114  | + | G | G |
| 14 | 88945590  | 88945590  | + | G | G |
| 3  | 120840543 | 120840543 | + | G | G |
| 13 | 19446001  | 19446001  | + | C | C |
| 19 | 15740024  | 15740024  | + | C | C |



|    |           |           |   |   |   |
|----|-----------|-----------|---|---|---|
| 3  | 78706364  | 78706364  | + | G | G |
| 19 | 15533857  | 15533857  | + | G | G |
| 14 | 33293441  | 33293441  | + | C | C |
| 3  | 107492090 | 107492090 | + | C | C |
| 1  | 179989839 | 179989839 | + | C | C |
| 19 | 46288868  | 46288868  | + | G | G |
| 17 | 7919277   | 7919277   | + | G | G |
| 17 | 40331011  | 40331011  | + | G | G |
| 10 | 7679269   | 7679269   | + | G | G |
| 4  | 1955227   | 1955227   | + | C | C |
| 11 | 66307007  | 66307007  | + | G | G |
| 19 | 54756712  | 54756712  | + | G | G |
| 10 | 103989028 | 103989028 | + | G | G |
| 1  | 208217971 | 208217971 | + | G | G |
| 14 | 73029176  | 73029176  | + | C | C |
| 1  | 44064546  | 44064546  | + | C | C |
| 14 | 73637581  | 73637581  | + | C | C |
| 19 | 8841668   | 8841668   | + | C | C |
| 15 | 88423639  | 88423639  | + | G | G |
| 11 | 19247100  | 19247100  | + | G | G |
| 11 | 35547177  | 35547177  | + | G | G |
| 2  | 165950892 | 165950892 | + | G | G |
| 5  | 16067717  | 16067717  | + | G | G |
| X  | 149613748 | 149613748 | + | C | C |
| 1  | 151752487 | 151752487 | + | C | C |
| 20 | 47251245  | 47251245  | + | G | G |
| 21 | 46311902  | 46311902  | + | G | G |
| 7  | 139529184 | 139529184 | + | G | G |
| X  | 35959422  | 35959422  | + | G | G |
| 9  | 131219678 | 131219678 | + | C | C |
| 13 | 38320331  | 38320331  | + | C | C |
| 6  | 84302205  | 84302205  | + | C | C |
| 3  | 128614229 | 128614229 | + | C | C |
| 6  | 14133980  | 14133980  | + | C | C |
| 7  | 82580288  | 82580288  | + | C | C |
| 10 | 97447109  | 97447109  | + | C | C |
| 8  | 103231067 | 103231067 | + | G | G |
| 5  | 135188396 | 135188396 | + | C | C |
| 4  | 115767076 | 115767076 | + | G | G |
| 2  | 160994623 | 160994623 | + | G | G |
| 1  | 19186116  | 19186116  | + | G | G |
| 14 | 22133546  | 22133546  | + | G | G |
| 9  | 7165282   | 7165282   | + | C | C |

|    |           |           |   |   |   |
|----|-----------|-----------|---|---|---|
| 21 | 38114030  | 38114030  | + | G | G |
| 5  | 175775026 | 175775026 | + | G | G |
| 19 | 56321627  | 56321627  | + | G | G |
| X  | 154528175 | 154528175 | + | G | G |
| 20 | 40790114  | 40790114  | + | C | C |
| 2  | 154801151 | 154801151 | + | G | G |
| 20 | 42635336  | 42635336  | + | C | C |
| 1  | 119958175 | 119958175 | + | G | G |
| 5  | 177419847 | 177419847 | + | C | C |
| 8  | 107704977 | 107704977 | + | G | G |
| 7  | 148801468 | 148801468 | + | G | G |
| 19 | 14862447  | 14862447  | + | G | G |
| 6  | 47573929  | 47573929  | + | C | C |
| 1  | 6533148   | 6533148   | + | G | G |
| 6  | 44254163  | 44254163  | + | C | C |
| 11 | 20639411  | 20639411  | + | G | G |
| X  | 153668540 | 153668540 | + | C | C |
| 13 | 36050146  | 36050146  | + | C | C |
| 18 | 31319943  | 31319943  | + | G | G |
| 19 | 53794449  | 53794449  | + | G | G |
| 5  | 106763133 | 106763133 | + | G | G |
| 8  | 69027999  | 69027999  | + | C | C |
| 20 | 20507015  | 20507015  | + | G | G |
| 20 | 42788638  | 42788638  | + | G | G |
| 16 | 81914520  | 81914520  | + | C | C |
| 11 | 44096165  | 44096165  | + | C | C |
| 14 | 88892739  | 88892739  | + | C | C |
| 1  | 179620195 | 179620195 | + | C | C |
| 12 | 68595656  | 68595656  | + | C | C |
| 15 | 65411793  | 65411793  | + | G | G |
| 11 | 92088255  | 92088255  | + | C | C |
| 17 | 40034384  | 40034384  | + | G | G |
| 17 | 61499060  | 61499060  | + | C | C |
| 20 | 644568    | 644568    | + | G | G |
| 17 | 66123889  | 66123889  | + | C | C |
| 14 | 24546695  | 24546695  | + | G | G |
| 9  | 130507248 | 130507248 | + | C | C |
| 3  | 81635264  | 81635264  | + | T | T |
| 22 | 32464588  | 32464588  | + | G | G |
| 11 | 55905118  | 55905118  | + | G | G |
| 6  | 41119121  | 41119121  | + | C | C |
| 11 | 62747008  | 62747008  | + | A | A |
| 12 | 14018855  | 14018855  | + | C | C |

|    |           |           |   |   |   |
|----|-----------|-----------|---|---|---|
| 11 | 408206    | 408206    | + | C | C |
| 11 | 30925127  | 30925127  | + | C | C |
| 10 | 28343026  | 28343026  | + | G | G |
| X  | 98974606  | 98974606  | + | C | C |
| 11 | 2426063   | 2426063   | + | G | G |
| 12 | 11463299  | 11463299  | + | C | C |
| 15 | 78208247  | 78208247  | + | C | C |
| X  | 17742473  | 17742473  | + | C | C |
| 14 | 23535183  | 23535183  | + | G | G |
| 5  | 161524774 | 161524774 | + | G | G |
| 1  | 228033751 | 228033751 | + | C | C |
| 14 | 51464688  | 51464688  | + | G | G |
| 19 | 58198755  | 58198755  | + | C | C |
| 2  | 11924080  | 11924080  | + | C | C |
| 20 | 61511885  | 61511885  | + | G | G |
| 2  | 21231599  | 21231599  | + | G | G |
| 11 | 62748537  | 62748537  | + | C | C |
| 14 | 91647605  | 91647605  | + | G | G |
| X  | 48887472  | 48887472  | + | C | C |
| X  | 46466468  | 46466468  | + | C | C |
| 19 | 45895184  | 45895184  | + | G | G |
| 3  | 138453641 | 138453641 | + | G | G |
| 2  | 187625846 | 187625846 | + | G | G |
| 12 | 56143332  | 56143332  | + | G | G |
| 22 | 38120665  | 38120665  | + | C | C |
| 1  | 156756833 | 156756833 | + | C | C |
| 9  | 27228299  | 27228299  | + | G | G |
| 19 | 42090784  | 42090784  | + | G | G |
| 11 | 67074517  | 67074517  | + | C | C |
| 3  | 183960269 | 183960269 | + | G | G |
| 17 | 40474405  | 40474405  | + | G | G |
| 15 | 62259574  | 62259574  | + | T | T |
| 20 | 33329299  | 33329299  | + | G | G |
| 1  | 152279679 | 152279679 | + | C | C |
| 2  | 231624703 | 231624703 | + | C | C |
| 3  | 160804406 | 160804406 | + | C | C |
| 8  | 132002765 | 132002765 | + | G | G |
| 12 | 113446996 | 113446996 | + | C | C |
| 9  | 35092242  | 35092242  | + | G | G |
| 6  | 32147848  | 32147848  | + | C | C |
| 1  | 72058631  | 72058631  | + | C | C |
| 17 | 72926993  | 72926993  | + | C | C |
| 4  | 138442795 | 138442795 | + | C | C |

|    |           |           |   |   |   |
|----|-----------|-----------|---|---|---|
| 14 | 20215754  | 20215754  | + | C | C |
| 1  | 52850291  | 52850291  | + | G | G |
| X  | 29973609  | 29973609  | + | C | C |
| 19 | 10419324  | 10419324  | + | G | G |
| 12 | 68642487  | 68642487  | + | C | C |
| 14 | 100847560 | 100847560 | + | G | G |
| 1  | 152193489 | 152193489 | + | C | C |
| 2  | 192141676 | 192141676 | + | G | G |
| 1  | 18809200  | 18809200  | + | G | G |
| 8  | 21926978  | 21926978  | + | C | C |
| 17 | 44143994  | 44143994  | + | C | C |
| 1  | 57480821  | 57480821  | + | C | C |
| 14 | 55836368  | 55836368  | + | G | G |
| 14 | 39560901  | 39560901  | + | G | G |
| 11 | 70319087  | 70319087  | + | C | C |
| 4  | 155241861 | 155241861 | + | G | G |
| 15 | 22473327  | 22473327  | + | G | G |
| 5  | 63256524  | 63256524  | + | C | C |
| 1  | 230927615 | 230927615 | + | G | G |
| 10 | 124036429 | 124036429 | + | G | G |
| 19 | 22575616  | 22575616  | + | C | C |
| 9  | 19316661  | 19316661  | + | C | C |
| 8  | 1617909   | 1617909   | + | G | G |
| 17 | 38859914  | 38859914  | + | C | C |
| 12 | 48723350  | 48723350  | + | G | G |
| 18 | 50734090  | 50734090  | + | G | G |
| 5  | 140790173 | 140790173 | + | G | G |
| 20 | 9402103   | 9402103   | + | C | C |
| 19 | 57647323  | 57647323  | + | G | G |
| 14 | 23901905  | 23901905  | + | C | C |
| 11 | 69978065  | 69978065  | + | C | C |
| 14 | 95080648  | 95080648  | + | G | G |
| 6  | 26452373  | 26452373  | + | C | C |
| 19 | 37643507  | 37643507  | + | G | G |
| 5  | 114604633 | 114604633 | + | C | C |
| 14 | 81606152  | 81606152  | + | G | G |
| X  | 142717718 | 142717718 | + | G | G |
| 20 | 47740972  | 47740972  | + | G | G |
| 19 | 43406388  | 43406388  | + | C | C |
| 16 | 71423848  | 71423848  | + | C | C |
| 2  | 26624884  | 26624884  | + | C | C |
| 19 | 45297510  | 45297510  | + | G | G |
| 19 | 44636534  | 44636534  | + | C | C |

|    |           |           |   |   |   |
|----|-----------|-----------|---|---|---|
| 3  | 53700370  | 53700370  | + | C | C |
| 22 | 31536269  | 31536269  | + | G | G |
| 1  | 110754689 | 110754689 | + | G | G |
| 2  | 108476242 | 108476242 | + | G | G |
| 9  | 87285584  | 87285584  | + | G | G |
| 5  | 171520876 | 171520876 | + | G | G |
| X  | 47307688  | 47307688  | + | G | G |
| 5  | 54405878  | 54405878  | + | G | G |
| 3  | 71027021  | 71027021  | + | G | G |
| 12 | 70194015  | 70194015  | + | C | C |
| 13 | 67800395  | 67800395  | + | G | G |
| 12 | 130898839 | 130898839 | + | C | C |
| 7  | 48081080  | 48081080  | + | G | G |
| 1  | 181767531 | 181767531 | + | C | C |
| 17 | 1264456   | 1264456   | + | G | G |
| 1  | 22903088  | 22903088  | + | G | G |
| 19 | 51958792  | 51958792  | + | C | C |
| 1  | 172434496 | 172434496 | + | C | C |
| 7  | 23300310  | 23300310  | + | C | C |
| 4  | 619464    | 619464    | + | G | G |
| X  | 117043814 | 117043814 | + | C | C |
| 11 | 1025254   | 1025254   | + | G | G |
| 8  | 30695560  | 30695560  | + | G | G |
| 13 | 111532051 | 111532051 | + | G | G |
| X  | 139038210 | 139038210 | + | G | G |
| 19 | 51519180  | 51519180  | + | G | G |
| 1  | 52850292  | 52850292  | + | G | G |
| 14 | 96157767  | 96157767  | + | C | C |
| 1  | 153122339 | 153122339 | + | C | C |
| 9  | 121930136 | 121930136 | + | G | G |
| 7  | 6426892   | 6426892   | + | C | C |
| 1  | 158812187 | 158812187 | + | C | C |
| 19 | 54760372  | 54760372  | + | G | G |
| 9  | 128723126 | 128723126 | + | C | C |
| 5  | 140784766 | 140784766 | + | C | C |
| 11 | 40136033  | 40136033  | + | G | G |
| 9  | 27949670  | 27949670  | + | C | C |
| 19 | 19452151  | 19452151  | + | C | C |
| 10 | 95791079  | 95791079  | + | G | G |
| 2  | 131976449 | 131976449 | + | C | C |
| 5  | 147550526 | 147550526 | + | G | G |
| 20 | 57288652  | 57288652  | + | C | C |
| 14 | 99642196  | 99642196  | + | T | T |

|    |           |           |   |   |   |
|----|-----------|-----------|---|---|---|
| X  | 9864382   | 9864382   | + | C | C |
| 3  | 127396327 | 127396327 | + | C | C |
| 8  | 17157280  | 17157280  | + | C | C |
| 13 | 25670494  | 25670494  | + | A | A |
| 2  | 168098307 | 168098307 | + | G | G |
| 5  | 54275124  | 54275124  | + | G | G |
| 14 | 42360781  | 42360781  | + | C | C |
| 22 | 42128254  | 42128254  | + | G | G |
| 17 | 68172062  | 68172062  | + | C | C |
| 5  | 150275724 | 150275724 | + | C | C |
| 4  | 76711919  | 76711919  | + | C | C |
| 10 | 133951677 | 133951677 | + | C | C |
| 1  | 236920824 | 236920824 | + | C | C |
| 18 | 13884818  | 13884818  | + | G | G |
| 11 | 118128001 | 118128001 | + | C | C |
| 1  | 19500054  | 19500054  | + | G | G |
| 22 | 45309713  | 45309713  | + | C | C |
| 12 | 109660629 | 109660629 | + | C | C |
| 11 | 55419045  | 55419045  | + | C | C |
| X  | 142596850 | 142596850 | + | G | G |
| 1  | 6291992   | 6291992   | + | G | G |
| 11 | 4967524   | 4967524   | + | G | G |
| 6  | 161143527 | 161143527 | + | G | G |
| 15 | 23811089  | 23811089  | + | G | G |
| 13 | 95715085  | 95715085  | + | C | C |
| 9  | 15019674  | 15019674  | + | T | T |
| 1  | 183909906 | 183909906 | + | C | C |
| 15 | 83350318  | 83350318  | + | C | C |
| 10 | 34759087  | 34759087  | + | G | G |
| 3  | 140251235 | 140251235 | + | G | G |
| 10 | 15649678  | 15649678  | + | G | G |
| 5  | 140255881 | 140255881 | + | G | G |
| 16 | 71218876  | 71218876  | + | G | G |
| 6  | 102503255 | 102503255 | + | G | G |
| 7  | 86394322  | 86394322  | + | G | G |
| 15 | 42742013  | 42742013  | + | C | C |
| X  | 128699854 | 128699854 | + | C | C |
| 2  | 60688824  | 60688824  | + | T | T |
| 12 | 29649154  | 29649154  | + | G | G |
| 11 | 55890648  | 55890648  | + | C | C |
| 6  | 56483106  | 56483106  | + | G | G |
| 5  | 150946163 | 150946163 | + | G | G |
| 19 | 20728615  | 20728615  | + | C | C |

|    |           |           |   |   |   |
|----|-----------|-----------|---|---|---|
| 1  | 245704144 | 245704144 | + | G | G |
| 22 | 26688383  | 26688383  | + | G | G |
| 18 | 21095940  | 21095940  | + | C | C |
| 19 | 49398260  | 49398260  | + | C | C |
| 8  | 39564399  | 39564399  | + | G | G |
| 11 | 5878226   | 5878226   | + | C | C |
| 16 | 2345683   | 2345683   | + | G | G |
| 7  | 100371396 | 100371396 | + | C | C |
| 10 | 32873160  | 32873160  | + | G | G |
| 19 | 54080544  | 54080544  | + | G | G |
| 3  | 170736366 | 170736366 | + | G | G |
| X  | 151303796 | 151303796 | + | G | G |
| 2  | 54081323  | 54081323  | + | G | G |
| 4  | 175897324 | 175897324 | + | G | G |
| 11 | 55905119  | 55905119  | + | G | G |
| 16 | 20787196  | 20787196  | + | G | G |
| 2  | 179480434 | 179480434 | + | G | G |
| 2  | 88387502  | 88387502  | + | G | G |
| 1  | 204587102 | 204587102 | + | G | G |
| 1  | 75038333  | 75038333  | + | C | C |
| 11 | 99715862  | 99715862  | + | C | C |
| 4  | 177063141 | 177063141 | + | C | C |
| 1  | 176734926 | 176734926 | + | G | G |
| 2  | 241737220 | 241737220 | + | G | G |
| X  | 47307689  | 47307689  | + | G | G |
| X  | 131261990 | 131261990 | + | C | C |
| X  | 36162768  | 36162768  | + | C | C |
| 1  | 66064414  | 66064414  | + | G | G |
| X  | 15582236  | 15582236  | + | G | G |
| 17 | 36485568  | 36485568  | + | C | C |
| 11 | 10521638  | 10521638  | + | G | G |
| 3  | 196210728 | 196210728 | + | G | G |
| 1  | 12025624  | 12025624  | + | C | C |
| 12 | 112631422 | 112631422 | + | G | G |
| 14 | 106586378 | 106586378 | + | G | G |
| 1  | 20991142  | 20991142  | + | C | C |
| 2  | 168102607 | 168102607 | + | G | G |
| 1  | 95492713  | 95492713  | + | G | G |
| 7  | 103848331 | 103848331 | + | C | C |
| 17 | 45198225  | 45198225  | + | G | G |
| 2  | 207170180 | 207170180 | + | C | C |
| 16 | 49672302  | 49672302  | + | G | G |
| 12 | 52283117  | 52283117  | + | C | C |

|    |           |           |   |   |   |
|----|-----------|-----------|---|---|---|
| 16 | 16127022  | 16127022  | + | C | C |
| 4  | 71201163  | 71201163  | + | C | C |
| 19 | 15559029  | 15559029  | + | G | G |
| 6  | 145157493 | 145157493 | + | C | C |
| 11 | 7110409   | 7110409   | + | G | G |
| X  | 13754690  | 13754690  | + | C | C |
| 19 | 39098776  | 39098776  | + | C | C |
| 12 | 8375340   | 8375340   | + | C | C |
| 2  | 26697525  | 26697525  | + | C | C |
| 15 | 48431203  | 48431203  | + | A | A |
| 6  | 30075941  | 30075941  | + | C | C |
| 1  | 176915171 | 176915171 | + | C | C |
| 12 | 121469315 | 121469315 | + | C | C |
| 19 | 48558264  | 48558264  | + | G | G |
| 4  | 164534483 | 164534483 | + | G | G |
| 17 | 58120986  | 58120986  | + | G | G |
| 12 | 14769624  | 14769624  | + | G | G |
| 5  | 13829733  | 13829733  | + | G | G |
| 9  | 138670666 | 138670666 | + | C | C |
| 14 | 107170229 | 107170229 | + | T | T |
| X  | 101768900 | 101768900 | + | G | G |
| 3  | 48896996  | 48896996  | + | C | C |
| 2  | 136594164 | 136594164 | + | G | G |
| 3  | 48641051  | 48641051  | + | C | C |
| X  | 135469904 | 135469904 | + | C | C |
| 12 | 100934521 | 100934521 | + | C | C |
| 22 | 20779729  | 20779729  | + | G | G |
| 5  | 26881162  | 26881162  | + | C | C |
| 22 | 30899711  | 30899711  | + | G | G |
| 1  | 115222915 | 115222915 | + | C | C |
| 13 | 52544773  | 52544773  | + | G | G |
| X  | 79698201  | 79698201  | + | G | G |
| 7  | 142459685 | 142459685 | + | C | C |
| 9  | 123280883 | 123280883 | + | G | G |
| 5  | 125939612 | 125939612 | + | C | C |
| 1  | 2938820   | 2938820   | + | G | G |
| 7  | 107707034 | 107707034 | + | G | G |
| X  | 73963233  | 73963233  | + | C | C |
| 1  | 163295914 | 163295914 | + | G | G |
| 19 | 2410308   | 2410308   | + | A | A |
| 19 | 22940120  | 22940120  | + | C | C |
| 11 | 58189863  | 58189863  | + | C | C |
| 9  | 32408601  | 32408601  | + | C | C |



|    |           |           |   |   |   |
|----|-----------|-----------|---|---|---|
| 16 | 67039245  | 67039245  | + | C | C |
| 19 | 55174479  | 55174479  | + | A | A |
| 4  | 155161823 | 155161823 | + | C | C |
| 6  | 55406584  | 55406584  | + | T | T |
| 19 | 42753117  | 42753117  | + | G | G |
| 1  | 114450727 | 114450727 | + | C | C |
| 19 | 43866460  | 43866460  | + | C | C |
| 1  | 201869369 | 201869369 | + | C | C |
| 2  | 74274689  | 74274689  | + | C | C |
| 15 | 25472310  | 25472310  | + | C | C |
| 17 | 66880519  | 66880519  | + | A | A |
| X  | 151128115 | 151128115 | + | C | C |
| 15 | 53997325  | 53997325  | + | C | C |
| 19 | 56466547  | 56466547  | + | G | G |
| 12 | 85441268  | 85441268  | + | C | C |
| 1  | 158596653 | 158596653 | + | C | C |
| 6  | 93967183  | 93967183  | + | G | G |
| 15 | 84685134  | 84685134  | + | G | G |
| 12 | 70980810  | 70980810  | + | G | G |
| 1  | 27876446  | 27876446  | + | G | G |
| 3  | 77607238  | 77607238  | + | C | C |
| 15 | 88690584  | 88690584  | + | G | G |
| 17 | 44143995  | 44143995  | + | C | C |
| 4  | 128689927 | 128689927 | + | G | G |
| 1  | 240979637 | 240979637 | + | C | C |
| 14 | 70634239  | 70634239  | + | G | G |
| 14 | 94780441  | 94780441  | + | A | A |
| 21 | 19685341  | 19685341  | + | G | G |
| 15 | 89400796  | 89400796  | + | C | C |
| 8  | 88297006  | 88297006  | + | T | T |
| 8  | 67803130  | 67803130  | + | C | C |
| 11 | 4869859   | 4869859   | + | G | G |
| 8  | 52336259  | 52336259  | + | G | G |
| 18 | 23866416  | 23866416  | + | C | C |
| 10 | 32873159  | 32873159  | + | G | G |
| 13 | 20356694  | 20356694  | + | C | C |
| 17 | 71429946  | 71429946  | + | C | C |
| 19 | 3821369   | 3821369   | + | C | C |
| 8  | 86126960  | 86126960  | + | T | T |
| 12 | 124416189 | 124416189 | + | C | C |
| 22 | 26348362  | 26348362  | + | C | C |
| 11 | 43941493  | 43941493  | + | C | C |
| 5  | 176026077 | 176026077 | + | G | G |

|    |           |           |   |   |   |
|----|-----------|-----------|---|---|---|
| 22 | 32464587  | 32464587  | + | G | G |
| 12 | 123497177 | 123497177 | + | T | T |
| 19 | 48542572  | 48542572  | + | C | C |
| 9  | 117552595 | 117552595 | + | C | C |
| 19 | 17476764  | 17476764  | + | C | C |
| 14 | 91779982  | 91779982  | + | C | C |
| 20 | 46318973  | 46318973  | + | G | G |
| 19 | 42599596  | 42599596  | + | C | C |
| 1  | 207758042 | 207758042 | + | G | G |
| 11 | 93821963  | 93821963  | + | G | G |
| 5  | 140248851 | 140248851 | + | G | G |
| 3  | 185167746 | 185167746 | + | G | G |
| 22 | 50564678  | 50564678  | + | G | G |
| 15 | 45724289  | 45724289  | + | C | C |
| 11 | 4869801   | 4869801   | + | G | G |
| 3  | 72897546  | 72897546  | + | C | C |
| 18 | 5394706   | 5394706   | + | G | G |
| 8  | 17927368  | 17927368  | + | G | G |
| 4  | 69416525  | 69416525  | + | G | G |
| 5  | 169688049 | 169688049 | + | C | C |
| 16 | 22926885  | 22926885  | + | C | C |
| 19 | 51742880  | 51742880  | + | C | C |
| 17 | 73484890  | 73484890  | + | C | C |
| X  | 135427924 | 135427924 | + | C | C |
| 22 | 45804663  | 45804663  | + | A | A |
| 19 | 2217897   | 2217897   | + | C | C |
| 14 | 64453266  | 64453266  | + | C | C |
| 22 | 39499917  | 39499917  | + | C | C |
| 3  | 183017793 | 183017793 | + | C | C |
| 8  | 2857481   | 2857481   | + | G | G |
| 16 | 70889125  | 70889125  | + | C | C |
| 6  | 165956962 | 165956962 | + | C | C |
| X  | 77244189  | 77244189  | + | G | G |
| 1  | 24673048  | 24673048  | + | C | C |
| 3  | 141499263 | 141499263 | + | G | G |
| X  | 149013978 | 149013978 | + | C | C |
| 22 | 19905702  | 19905702  | + | G | G |
| 3  | 46414496  | 46414496  | + | C | C |
| X  | 152825307 | 152825307 | + | C | C |
| 19 | 55697687  | 55697687  | + | G | G |
| 21 | 27074522  | 27074522  | + | C | C |
| 20 | 44752046  | 44752046  | + | T | T |
| 11 | 55595330  | 55595330  | + | G | G |

|            |           |           |   |     |     |
|------------|-----------|-----------|---|-----|-----|
| X          | 39914747  | 39914747  | + | C   | C   |
| 12         | 130831107 | 130831107 | + | T   | T   |
| 19         | 42221411  | 42221411  | + | C   | C   |
| 4          | 125590767 | 125590767 | + | G   | G   |
| 17         | 45198226  | 45198226  | + | A   | A   |
| X          | 47774326  | 47774326  | + | G   | G   |
| 12         | 21998550  | 21998550  | + | C   | C   |
| 3          | 124132471 | 124132471 | + | G   | G   |
| 6          | 16328081  | 16328081  | + | G   | G   |
| 6          | 38851157  | 38851157  | + | G   | G   |
| 17         | 34325917  | 34325917  | + | G   | G   |
| 3          | 38892230  | 38892230  | + | C   | C   |
| 5          | 161300162 | 161300162 | + | G   | G   |
| 4          | 164393234 | 164393234 | + | G   | G   |
| 11         | 22391708  | 22391708  | + | G   | G   |
| 2          | 210559070 | 210559070 | + | C   | C   |
| 19         | 2987877   | 2987877   | + | C   | C   |
| 1          | 196658599 | 196658599 | + | G   | G   |
| 6          | 31839150  | 31839150  | + | G   | G   |
| 17         | 4619834   | 4619834   | + | G   | G   |
| 4          | 164507062 | 164507062 | + | C   | C   |
| 11         | 6942515   | 6942515   | + | C   | C   |
| 12         | 121458294 | 121458294 | + | G   | G   |
| GL000194.1 | 68376     | 68376     | + | T   | T   |
| 4          | 40427850  | 40427850  | + | C   | C   |
| 19         | 58198756  | 58198756  | + | C   | C   |
| X          | 53561550  | 53561550  | + | C   | C   |
| 9          | 131017033 | 131017033 | + | C   | C   |
| 2          | 168104310 | 168104310 | + | G   | G   |
| 15         | 72533754  | 72533754  | + | G   | G   |
| 9          | 21971208  | 21971208  | + | C   | C   |
| 16         | 20871519  | 20871519  | + | G   | G   |
| X          | 105153320 | 105153320 | + | G   | G   |
| 16         | 29989164  | 29989164  | + | C   | C   |
| 6          | 38854699  | 38854699  | + | G   | G   |
| 17         | 34266317  | 34266317  | + | G   | G   |
| 2          | 37247962  | 37247963  | + | -   | -   |
| 4          | 4389474   | 4389475   | + | CC  | CC  |
| 16         | 88783583  | 88783585  | + | TCT | TCT |
| 10         | 48428831  | 48428831  | + | G   | G   |
| 18         | 21399917  | 21399917  | + | C   | C   |
| 19         | 17439007  | 17439007  | + | G   | G   |
| 16         | 31138346  | 31138346  | + | C   | C   |

|            |           |           |   |   |   |
|------------|-----------|-----------|---|---|---|
| 2          | 230312108 | 230312108 | + | G | G |
| 6          | 30656578  | 30656578  | + | G | G |
| 15         | 83926276  | 83926276  | + | G | G |
| X          | 36337340  | 36337340  | + | G | G |
| 9          | 136037855 | 136037855 | + | G | G |
| 3          | 122634365 | 122634365 | + | C | C |
| 4          | 162508606 | 162508606 | + | C | C |
| 4          | 74354424  | 74354424  | + | C | C |
| 2          | 141625798 | 141625798 | + | G | G |
| 2          | 208420371 | 208420371 | + | A | A |
| 2          | 201436786 | 201436786 | + | C | C |
| 3          | 138038368 | 138038368 | + | G | G |
| 1          | 211093130 | 211093130 | + | C | C |
| 2          | 179499093 | 179499093 | + | C | C |
| 6          | 35090046  | 35090046  | + | C | C |
| 12         | 76454036  | 76454036  | + | C | C |
| 1          | 144951880 | 144951880 | + | A | A |
| 10         | 27702750  | 27702750  | + | C | C |
| 5          | 96222452  | 96222452  | + | G | G |
| GL000193.1 | 88225     | 88225     | + | C | C |
| X          | 11777904  | 11777904  | + | C | C |
| 6          | 109837155 | 109837155 | + | C | C |
| 17         | 45368517  | 45368517  | + | C | C |
| 16         | 30679940  | 30679940  | + | G | G |
| 4          | 47788782  | 47788782  | + | C | C |
| 16         | 69170747  | 69170747  | + | C | C |
| 17         | 62079400  | 62079400  | + | C | C |
| 2          | 155711814 | 155711814 | + | C | C |
| 6          | 41303633  | 41303633  | + | C | C |
| 3          | 189586498 | 189586498 | + | G | G |
| 5          | 145887490 | 145887490 | + | C | C |
| 12         | 15103593  | 15103593  | + | C | C |
| 11         | 85606413  | 85606413  | + | G | G |
| 14         | 73959829  | 73959829  | + | C | C |
| 19         | 42572969  | 42572969  | + | C | C |
| 1          | 115256529 | 115256529 | + | T | T |
| 1          | 68942736  | 68942736  | + | G | G |
| 16         | 56717262  | 56717262  | + | T | T |
| 6          | 66205297  | 66205297  | + | C | C |
| 13         | 36905617  | 36905617  | + | G | G |
| 6          | 131211473 | 131211473 | + | G | G |
| 2          | 108872141 | 108872141 | + | C | C |
| 9          | 77415308  | 77415308  | + | C | C |

|            |           |           |   |   |   |
|------------|-----------|-----------|---|---|---|
| 8          | 94935361  | 94935361  | + | C | C |
| 1          | 233515161 | 233515161 | + | C | C |
| X          | 122488800 | 122488800 | + | A | A |
| 19         | 49990691  | 49990691  | + | G | G |
| 5          | 150578581 | 150578581 | + | C | C |
| 8          | 8750259   | 8750259   | + | G | G |
| 14         | 23282239  | 23282239  | + | G | G |
| 18         | 2891900   | 2891900   | + | G | G |
| 8          | 56362621  | 56362621  | + | G | G |
| 3          | 186952892 | 186952892 | + | C | C |
| 19         | 9451824   | 9451824   | + | T | T |
| GL000237.1 | 2524      | 2524      | + | C | C |
| 5          | 52235520  | 52235520  | + | T | T |
| 9          | 99154642  | 99154642  | + | G | G |
| 21         | 34924689  | 34924689  | + | C | C |
| 21         | 46925294  | 46925294  | + | G | G |
| 2          | 155711487 | 155711487 | + | G | G |
| 14         | 23345917  | 23345917  | + | C | C |
| 6          | 133852346 | 133852346 | + | G | G |
| 7          | 30791819  | 30791819  | + | G | G |
| 19         | 51378153  | 51378153  | + | G | G |
| 7          | 151842314 | 151842314 | + | G | G |
| 12         | 69233139  | 69233139  | + | G | G |
| 4          | 843386    | 843386    | + | C | C |
| 13         | 46942194  | 46942194  | + | G | G |
| 1          | 3331153   | 3331153   | + | C | C |
| 1          | 180905453 | 180905453 | + | C | C |
| 8          | 118817132 | 118817132 | + | T | T |
| 3          | 97251245  | 97251245  | + | G | G |
| 10         | 50341868  | 50341868  | + | C | C |
| 15         | 60741091  | 60741091  | + | C | C |
| 5          | 156346491 | 156346491 | + | C | C |
| 5          | 26885885  | 26885885  | + | C | C |
| 10         | 85979118  | 85979118  | + | C | C |
| 13         | 39264959  | 39264959  | + | G | G |
| 7          | 64313564  | 64313564  | + | C | C |
| 8          | 125463829 | 125463829 | + | A | A |
| 15         | 89760520  | 89760520  | + | C | C |
| 2          | 48906497  | 48906497  | + | G | G |
| 2          | 128918798 | 128918798 | + | G | G |
| 19         | 35487003  | 35487003  | + | C | C |
| 12         | 57406628  | 57406628  | + | C | C |
| 3          | 121975937 | 121975937 | + | C | C |

|    |           |           |   |   |   |
|----|-----------|-----------|---|---|---|
| 10 | 27702751  | 27702751  | + | C | C |
| 19 | 45997537  | 45997537  | + | G | G |
| 1  | 24069886  | 24069886  | + | G | G |
| 1  | 152060521 | 152060521 | + | C | C |
| 11 | 93088595  | 93088595  | + | A | A |
| 12 | 56815964  | 56815964  | + | C | C |
| 4  | 120243201 | 120243201 | + | C | C |
| 5  | 1034925   | 1034925   | + | C | C |
| 7  | 1532653   | 1532653   | + | G | G |
| 19 | 5131443   | 5131443   | + | G | G |
| 14 | 105833689 | 105833689 | + | C | C |
| 12 | 81657102  | 81657102  | + | C | C |
| 14 | 92278808  | 92278808  | + | G | G |
| 19 | 2341445   | 2341445   | + | G | G |
| 1  | 19166824  | 19166824  | + | G | G |
| 4  | 4304720   | 4304720   | + | C | C |
| 13 | 114795364 | 114795364 | + | C | C |
| 8  | 30915896  | 30915896  | + | C | C |
| 1  | 110884796 | 110884796 | + | C | C |
| 21 | 47404354  | 47404354  | + | C | C |
| 9  | 102590768 | 102590768 | + | C | C |
| 2  | 167300157 | 167300157 | + | C | C |
| 3  | 48342794  | 48342794  | + | C | C |
| 2  | 130877756 | 130877756 | + | C | C |
| 19 | 22939275  | 22939275  | + | G | G |
| 6  | 116443093 | 116443093 | + | A | A |
| 16 | 28164027  | 28164027  | + | G | G |
| 19 | 9089725   | 9089725   | + | C | C |
| 9  | 37708395  | 37708395  | + | G | G |
| X  | 88008602  | 88008602  | + | G | G |
| 21 | 10998223  | 10998223  | + | C | C |
| 3  | 125833507 | 125833507 | + | G | G |
| 1  | 240963943 | 240963943 | + | C | C |
| 19 | 621228    | 621228    | + | G | G |
| 5  | 140603429 | 140603429 | + | C | C |
| 16 | 3778428   | 3778428   | + | T | T |
| 9  | 35717211  | 35717211  | + | C | C |
| 1  | 203144766 | 203144766 | + | T | T |
| 3  | 50329972  | 50329972  | + | C | C |
| 2  | 28032889  | 28032889  | + | C | C |
| X  | 20068944  | 20068944  | + | G | G |
| 4  | 84516073  | 84516073  | + | G | G |
| 3  | 38104198  | 38104198  | + | C | C |

|    |           |           |   |   |   |
|----|-----------|-----------|---|---|---|
| 11 | 64702884  | 64702884  | + | C | C |
| 2  | 91843442  | 91843442  | + | C | C |
| 12 | 55820947  | 55820947  | + | A | A |
| 19 | 50666012  | 50666012  | + | C | C |
| 8  | 32579560  | 32579560  | + | G | G |
| 6  | 29054567  | 29054567  | + | G | G |
| 6  | 7229512   | 7229512   | + | C | C |
| 19 | 17937433  | 17937433  | + | G | G |
| 1  | 27632899  | 27632899  | + | C | C |
| 22 | 50942044  | 50942044  | + | C | C |
| 1  | 170695498 | 170695498 | + | G | G |
| 1  | 248616379 | 248616379 | + | C | C |
| 2  | 171509556 | 171509556 | + | C | C |
| 12 | 11546821  | 11546821  | + | C | C |
| 19 | 38931399  | 38931399  | + | C | C |
| 16 | 31804701  | 31804701  | + | C | C |
| 6  | 33414432  | 33414432  | + | G | G |
| 11 | 47711663  | 47711663  | + | G | G |
| 16 | 31414912  | 31414912  | + | C | C |
| 17 | 39643856  | 39643856  | + | C | C |
| 2  | 90259809  | 90259809  | + | C | C |
| 1  | 8390678   | 8390678   | + | C | C |
| 16 | 15917169  | 15917169  | + | C | C |
| 5  | 153181915 | 153181915 | + | G | G |
| 2  | 231775426 | 231775426 | + | G | G |
| 4  | 53611041  | 53611041  | + | C | C |
| 17 | 72845936  | 72845936  | + | G | G |
| 9  | 33933598  | 33933598  | + | G | G |
| 16 | 14041719  | 14041719  | + | G | G |
| 6  | 117150041 | 117150041 | + | C | C |
| 9  | 14819310  | 14819310  | + | C | C |
| 2  | 179449961 | 179449961 | + | C | C |
| 12 | 104067690 | 104067690 | + | C | C |
| 14 | 20482700  | 20482700  | + | G | G |
| 14 | 89168868  | 89168868  | + | C | C |
| 6  | 167796411 | 167796411 | + | G | G |
| 16 | 9857225   | 9857225   | + | T | T |
| 3  | 195452999 | 195452999 | + | G | G |
| 8  | 121644849 | 121644849 | + | G | G |
| 5  | 101755647 | 101755647 | + | T | T |
| 19 | 37487531  | 37487531  | + | C | C |
| 17 | 79503280  | 79503280  | + | C | C |
| 8  | 121220545 | 121220545 | + | C | C |

|    |           |           |   |   |   |
|----|-----------|-----------|---|---|---|
| 16 | 88504765  | 88504765  | + | C | C |
| 2  | 128628433 | 128628433 | + | G | G |
| 7  | 128767354 | 128767354 | + | C | C |
| 6  | 84894912  | 84894912  | + | C | C |
| 21 | 33974109  | 33974109  | + | A | A |
| 15 | 50545846  | 50545846  | + | C | C |
| 10 | 27485237  | 27485237  | + | G | G |
| 11 | 119058816 | 119058816 | + | C | C |
| 6  | 37186465  | 37186465  | + | G | G |
| 8  | 124243565 | 124243565 | + | C | C |
| 16 | 2103880   | 2103880   | + | C | C |
| 1  | 120345730 | 120345730 | + | A | A |
| 22 | 29130403  | 29130403  | + | A | A |
| 3  | 142740219 | 142740219 | + | C | C |
| 7  | 75616919  | 75616919  | + | C | C |
| 10 | 103531279 | 103531279 | + | G | G |
| 1  | 207073649 | 207073649 | + | G | G |
| 5  | 157053532 | 157053532 | + | C | C |
| 17 | 7163704   | 7163704   | + | C | C |
| 3  | 123688996 | 123688996 | + | C | C |
| 3  | 112256650 | 112256650 | + | A | A |
| 19 | 48989011  | 48989011  | + | G | G |
| 8  | 24811284  | 24811284  | + | G | G |
| 1  | 200971403 | 200971403 | + | C | C |
| 5  | 161494884 | 161494884 | + | G | G |
| 4  | 120240779 | 120240779 | + | C | C |
| 14 | 107048754 | 107048754 | + | G | G |
| 12 | 109862629 | 109862629 | + | C | C |
| 4  | 68829130  | 68829130  | + | G | G |
| 19 | 15728935  | 15728935  | + | G | G |
| 12 | 126138367 | 126138367 | + | G | G |
| 13 | 21742369  | 21742369  | + | G | G |
| 1  | 204413267 | 204413267 | + | C | C |
| 12 | 57864840  | 57864840  | + | C | C |
| 7  | 137206667 | 137206667 | + | G | G |
| 5  | 19838965  | 19838965  | + | T | T |
| 2  | 239040365 | 239040365 | + | G | G |
| 14 | 51371997  | 51371997  | + | C | C |
| 7  | 64313565  | 64313565  | + | C | C |
| 6  | 161173948 | 161173948 | + | C | C |
| 3  | 11300689  | 11300689  | + | G | G |
| 8  | 41559594  | 41559594  | + | G | G |
| 15 | 56208059  | 56208059  | + | T | T |



|    |           |           |   |   |   |
|----|-----------|-----------|---|---|---|
| 1  | 216420452 | 216420452 | + | G | G |
| 16 | 61851407  | 61851407  | + | G | G |
| 11 | 73957087  | 73957087  | + | C | C |
| 10 | 121662332 | 121662332 | + | C | C |
| 14 | 23345916  | 23345916  | + | C | C |
| 8  | 27358478  | 27358478  | + | C | C |
| 8  | 59058798  | 59058798  | + | G | G |
| 2  | 182363336 | 182363336 | + | C | C |
| 17 | 3593633   | 3593633   | + | C | C |
| 19 | 49003040  | 49003040  | + | C | C |
| 18 | 21166471  | 21166471  | + | G | G |
| 20 | 45015986  | 45015986  | + | A | A |
| 9  | 138657522 | 138657522 | + | G | G |
| 3  | 186274316 | 186274316 | + | G | G |
| 19 | 55146138  | 55146138  | + | C | C |
| 8  | 133099982 | 133099982 | + | C | C |
| 18 | 13029677  | 13029677  | + | G | G |
| 9  | 86586990  | 86586990  | + | G | G |
| 19 | 11527273  | 11527273  | + | G | G |
| 5  | 123977033 | 123977033 | + | G | G |
| 5  | 41049454  | 41049454  | + | G | G |
| 10 | 91074341  | 91074341  | + | C | C |
| 19 | 50548197  | 50548197  | + | A | A |
| 16 | 10574766  | 10574766  | + | C | C |
| 15 | 98512364  | 98512364  | + | C | C |
| 6  | 7580345   | 7580345   | + | C | C |
| 2  | 189599304 | 189599304 | + | G | G |
| 2  | 98376210  | 98376210  | + | G | G |
| 9  | 114304612 | 114304612 | + | C | C |
| 17 | 77016122  | 77016122  | + | C | C |
| 20 | 44803494  | 44803494  | + | C | C |
| 12 | 124317676 | 124317676 | + | C | C |
| 19 | 57909974  | 57909974  | + | C | C |
| 4  | 152570820 | 152570820 | + | G | G |
| 5  | 140730602 | 140730602 | + | C | C |
| 1  | 248637005 | 248637005 | + | C | C |
| 8  | 68864832  | 68864832  | + | G | G |
| X  | 70367828  | 70367828  | + | C | C |
| 15 | 101813031 | 101813031 | + | C | C |
| 1  | 186275525 | 186275525 | + | G | G |
| 12 | 104063394 | 104063394 | + | G | G |
| 11 | 5364723   | 5364723   | + | A | A |
| X  | 41204449  | 41204449  | + | G | G |

|            |           |           |   |   |   |
|------------|-----------|-----------|---|---|---|
| 17         | 41020525  | 41020525  | + | G | G |
| 6          | 7229511   | 7229511   | + | C | C |
| 3          | 123688997 | 123688997 | + | C | C |
| X          | 36371758  | 36371758  | + | C | C |
| GL000209.1 | 71940     | 71940     | + | C | C |
| 1          | 196928121 | 196928121 | + | A | A |
| 6          | 65300914  | 65300914  | + | C | C |
| 15         | 91448654  | 91448654  | + | G | G |
| 1          | 148932872 | 148932872 | + | G | G |
| 6          | 37420917  | 37420917  | + | G | G |
| 4          | 55972898  | 55972898  | + | C | C |
| X          | 113961266 | 113961266 | + | G | G |
| 1          | 214816050 | 214816050 | + | C | C |
| 18         | 14534903  | 14534903  | + | C | C |
| 6          | 110734583 | 110734583 | + | C | C |
| 16         | 72033683  | 72033683  | + | T | T |
| 2          | 69201712  | 69201712  | + | C | C |
| 3          | 120347146 | 120347146 | + | C | C |
| 1          | 25245735  | 25245735  | + | G | G |
| 11         | 64702885  | 64702885  | + | C | C |
| 12         | 50047653  | 50047653  | + | G | G |
| MT         | 11052     | 11052     | + | T | T |
| 16         | 82033684  | 82033684  | + | C | C |
| 20         | 20491916  | 20491916  | + | T | T |
| 9          | 8492971   | 8492971   | + | G | G |
| 3          | 119445020 | 119445020 | + | C | C |
| 6          | 43590442  | 43590442  | + | G | G |
| 12         | 73014941  | 73014941  | + | A | A |
| 12         | 109862628 | 109862628 | + | C | C |
| 1          | 158435659 | 158435659 | + | C | C |
| 6          | 27293024  | 27293024  | + | C | C |
| 17         | 7163705   | 7163705   | + | C | C |
| 2          | 11955270  | 11955270  | + | C | C |
| 2          | 109526934 | 109526934 | + | G | G |
| 19         | 58565297  | 58565297  | + | G | G |
| 1          | 16525691  | 16525691  | + | G | G |
| 19         | 3805941   | 3805941   | + | G | G |
| 8          | 8750260   | 8750260   | + | G | G |
| 18         | 65178340  | 65178340  | + | G | G |
| 2          | 91969297  | 91969297  | + | G | G |
| 9          | 35869628  | 35869628  | + | G | G |
| 7          | 50198827  | 50198827  | + | G | G |
| 10         | 1779424   | 1779424   | + | C | C |

|    |           |           |   |   |   |
|----|-----------|-----------|---|---|---|
| 1  | 176833348 | 176833348 | + | C | C |
| 7  | 23944009  | 23944009  | + | T | T |
| 5  | 31323038  | 31323038  | + | G | G |
| 2  | 141215056 | 141215056 | + | A | A |
| 6  | 106552989 | 106552989 | + | C | C |
| 19 | 54972801  | 54972801  | + | A | A |
| 1  | 151752497 | 151752497 | + | C | C |
| X  | 12904184  | 12904184  | + | G | G |
| 7  | 48313188  | 48313188  | + | C | C |
| 2  | 145271203 | 145271203 | + | C | C |
| 5  | 35957439  | 35957439  | + | G | G |
| 19 | 57324956  | 57324956  | + | G | G |
| 8  | 2796047   | 2796047   | + | G | G |
| 3  | 189675573 | 189675573 | + | G | G |
| 4  | 110834279 | 110834279 | + | C | C |
| X  | 86924431  | 86924431  | + | C | C |
| 8  | 37735090  | 37735090  | + | G | G |
| 12 | 54496019  | 54496019  | + | G | G |
| 2  | 130897824 | 130897824 | + | C | C |
| 12 | 130927065 | 130927065 | + | C | C |
| 7  | 122809205 | 122809205 | + | C | C |
| 12 | 21643306  | 21643306  | + | G | G |
| 13 | 37441408  | 37441408  | + | A | A |
| 19 | 9075932   | 9075932   | + | C | C |
| 18 | 67687922  | 67687922  | + | C | C |
| 10 | 50532546  | 50532546  | + | G | G |
| 6  | 55264169  | 55264169  | + | G | G |
| 3  | 182841859 | 182841859 | + | C | C |
| 2  | 96049906  | 96049906  | + | G | G |
| 3  | 170625450 | 170625450 | + | C | C |
| 7  | 38370383  | 38370383  | + | G | G |
| 22 | 32754105  | 32754105  | + | G | G |
| 2  | 71650365  | 71650365  | + | G | G |
| 20 | 35127593  | 35127593  | + | T | T |
| 22 | 38349678  | 38349678  | + | C | C |
| 20 | 29633992  | 29633992  | + | A | A |
| 17 | 67212494  | 67212494  | + | G | G |
| 7  | 142197742 | 142197742 | + | C | C |
| 4  | 190876289 | 190876289 | + | G | G |
| 7  | 44146150  | 44146150  | + | C | C |
| 3  | 194392940 | 194392940 | + | C | C |
| 2  | 27551014  | 27551014  | + | C | C |
| 9  | 126774586 | 126774586 | + | C | C |

|    |           |           |   |   |   |
|----|-----------|-----------|---|---|---|
| 2  | 171225744 | 171225744 | + | G | G |
| 5  | 82406975  | 82406975  | + | A | A |
| 12 | 57324045  | 57324045  | + | G | G |
| 19 | 37130263  | 37130263  | + | G | G |
| 1  | 64669785  | 64669785  | + | G | G |
| 5  | 137211564 | 137211564 | + | C | C |
| 5  | 44305163  | 44305163  | + | C | C |
| 3  | 54872600  | 54872600  | + | G | G |
| 13 | 31736052  | 31736052  | + | G | G |
| 1  | 158548734 | 158548734 | + | C | C |
| 15 | 43574147  | 43574147  | + | C | C |
| 19 | 56884592  | 56884592  | + | G | G |
| 15 | 33936518  | 33936518  | + | T | T |
| 19 | 47440561  | 47440561  | + | C | C |
| 16 | 15727619  | 15727619  | + | G | G |
| X  | 63444249  | 63444249  | + | G | G |
| 5  | 176011851 | 176011851 | + | G | G |
| 9  | 79827939  | 79827939  | + | C | C |
| 1  | 12942997  | 12942997  | + | C | C |
| 17 | 73322082  | 73322082  | + | G | G |
| 4  | 62758580  | 62758580  | + | G | G |
| 3  | 142753780 | 142753780 | + | G | G |
| 6  | 148050718 | 148050718 | + | G | G |
| X  | 144904137 | 144904137 | + | A | A |
| 22 | 43870683  | 43870683  | + | C | C |
| 1  | 153122591 | 153122591 | + | C | C |
| X  | 138698492 | 138698492 | + | T | T |
| 3  | 158363451 | 158363451 | + | G | G |
| 1  | 93309077  | 93309077  | + | C | C |
| 4  | 94547561  | 94547561  | + | C | C |
| 1  | 20250083  | 20250083  | + | G | G |
| 12 | 15103592  | 15103592  | + | C | C |
| 13 | 41642785  | 41642785  | + | G | G |
| 2  | 63182717  | 63182717  | + | A | A |
| 19 | 48989010  | 48989010  | + | G | G |
| 14 | 22600924  | 22600924  | + | C | C |
| 7  | 94056938  | 94056938  | + | G | G |
| 7  | 56174183  | 56174183  | + | G | G |
| 10 | 115947699 | 115947699 | + | C | C |
| 8  | 69728180  | 69728180  | + | G | G |
| 2  | 218935275 | 218935275 | + | C | C |
| 2  | 231079750 | 231079750 | + | G | G |
| 20 | 43850512  | 43850512  | + | G | G |

|    |           |           |   |   |   |
|----|-----------|-----------|---|---|---|
| 12 | 104309601 | 104309601 | + | G | G |
| 15 | 79296245  | 79296245  | + | G | G |
| 17 | 7734018   | 7734018   | + | G | G |
| 19 | 33572090  | 33572090  | + | G | G |
| 9  | 14997243  | 14997243  | + | C | C |
| X  | 49071892  | 49071892  | + | G | G |
| 1  | 204129781 | 204129781 | + | C | C |
| 20 | 60913171  | 60913171  | + | C | C |
| 3  | 196158957 | 196158957 | + | T | T |
| 3  | 119367179 | 119367179 | + | G | G |
| 2  | 228174017 | 228174017 | + | G | G |
| 14 | 77293009  | 77293009  | + | T | T |
| 17 | 79096236  | 79096236  | + | T | T |
| 12 | 6103289   | 6103289   | + | C | C |
| 13 | 72440090  | 72440090  | + | T | T |
| 3  | 188933131 | 188933131 | + | G | G |
| 18 | 19244020  | 19244020  | + | G | G |
| 6  | 10898308  | 10898308  | + | C | C |
| 15 | 62539746  | 62539746  | + | C | C |
| 19 | 55221722  | 55221722  | + | G | G |
| X  | 31676156  | 31676156  | + | G | G |
| 7  | 47979900  | 47979900  | + | G | G |
| 2  | 209169621 | 209169621 | + | T | T |
| 17 | 26856211  | 26856211  | + | C | C |
| 2  | 234638537 | 234638537 | + | G | G |
| 15 | 78486957  | 78486957  | + | T | T |
| 4  | 99850219  | 99850219  | + | G | G |
| 6  | 136582473 | 136582473 | + | C | C |
| 2  | 141571369 | 141571369 | + | G | G |
| 5  | 140953145 | 140953145 | + | G | G |
| 14 | 22251593  | 22251593  | + | C | C |
| 3  | 113172663 | 113172663 | + | G | G |
| 10 | 93260365  | 93260365  | + | T | T |
| X  | 105451316 | 105451316 | + | G | G |
| 12 | 124957638 | 124957638 | + | G | G |
| 6  | 30124761  | 30124761  | + | G | G |
| 9  | 139982555 | 139982555 | + | G | G |
| 16 | 10527437  | 10527437  | + | G | G |
| 1  | 110931937 | 110931937 | + | C | C |
| 3  | 38812843  | 38812843  | + | C | C |
| 13 | 42761212  | 42761212  | + | C | C |
| 11 | 118773233 | 118773233 | + | G | G |
| 19 | 8127161   | 8127161   | + | G | G |

|    |           |           |   |   |   |
|----|-----------|-----------|---|---|---|
| 4  | 85207884  | 85207884  | + | G | G |
| 3  | 58303837  | 58303837  | + | C | C |
| 2  | 10822190  | 10822190  | + | G | G |
| 17 | 66430745  | 66430745  | + | G | G |
| 8  | 69017512  | 69017512  | + | G | G |
| 3  | 182841858 | 182841858 | + | C | C |
| 5  | 140182992 | 140182992 | + | C | C |
| 2  | 242149907 | 242149907 | + | G | G |
| 22 | 40066206  | 40066206  | + | G | G |
| 7  | 102063679 | 102063679 | + | A | A |
| 16 | 67213371  | 67213371  | + | C | C |
| 12 | 2743495   | 2743495   | + | C | C |
| 11 | 55861122  | 55861122  | + | C | C |
| 1  | 110931943 | 110931943 | + | C | C |
| 17 | 58740479  | 58740479  | + | C | C |
| 1  | 6512142   | 6512142   | + | G | G |
| 20 | 29976852  | 29976852  | + | C | C |
| 2  | 131976308 | 131976308 | + | G | G |
| 3  | 47461091  | 47461091  | + | C | C |
| 12 | 124288248 | 124288248 | + | G | G |
| 3  | 108076894 | 108076894 | + | C | C |
| 14 | 23345915  | 23345915  | + | C | C |
| 12 | 7945593   | 7945593   | + | G | G |
| 17 | 4442107   | 4442107   | + | T | T |
| 11 | 73957086  | 73957086  | + | C | C |
| 4  | 164271891 | 164271891 | + | G | G |
| 1  | 236925769 | 236925769 | + | C | C |
| 19 | 56466819  | 56466819  | + | G | G |
| 2  | 109546655 | 109546655 | + | C | C |
| 16 | 70989280  | 70989280  | + | G | G |
| 5  | 180166952 | 180166952 | + | G | G |
| 1  | 87188304  | 87188304  | + | A | A |
| 6  | 42231052  | 42231052  | + | C | C |
| 12 | 49170258  | 49170258  | + | G | G |
| 14 | 77580482  | 77580482  | + | C | C |
| 6  | 150346670 | 150346670 | + | C | C |
| 9  | 125048089 | 125048089 | + | G | G |
| 9  | 117188532 | 117188532 | + | G | G |
| 20 | 29625967  | 29625967  | + | G | G |
| 16 | 3071578   | 3071578   | + | C | C |
| 13 | 23903498  | 23903498  | + | A | A |
| 21 | 15663696  | 15663696  | + | G | G |
| 16 | 71668597  | 71668597  | + | T | T |

|    |           |           |   |   |   |
|----|-----------|-----------|---|---|---|
| X  | 73067292  | 73067292  | + | G | G |
| 4  | 158233939 | 158233939 | + | G | G |
| 14 | 20665881  | 20665881  | + | C | C |
| 11 | 68177417  | 68177417  | + | G | G |
| 1  | 2440387   | 2440387   | + | C | C |
| 7  | 119915196 | 119915196 | + | G | G |
| 12 | 50100868  | 50100868  | + | A | A |
| 19 | 45731240  | 45731240  | + | G | G |
| 11 | 6024016   | 6024016   | + | G | G |
| 19 | 36636727  | 36636728  | + | - | - |
| 2  | 241622172 | 241622172 | + | A | A |
| 2  | 163694964 | 163694964 | + | A | A |
| 5  | 149499063 | 149499063 | + | C | C |
| 17 | 57181710  | 57181710  | + | G | G |
| 22 | 18842424  | 18842424  | + | G | G |
| 6  | 52957231  | 52957231  | + | C | C |
| 2  | 97869931  | 97869931  | + | A | A |
| 17 | 39274016  | 39274016  | + | G | G |
| 1  | 111216246 | 111216246 | + | G | G |
| 22 | 25024067  | 25024067  | + | C | C |
| 1  | 15190     | 15190     | + | G | G |
| 5  | 112177520 | 112177520 | + | A | A |
| 1  | 16974592  | 16974592  | + | C | C |
| 1  | 19504070  | 19504070  | + | C | C |
| 3  | 10974900  | 10974900  | + | G | G |
| 20 | 61873918  | 61873918  | + | G | G |
| 4  | 107163639 | 107163639 | + | G | G |
| 19 | 11624781  | 11624781  | + | G | G |
| 17 | 78899231  | 78899231  | + | C | C |
| 3  | 195447805 | 195447805 | + | T | T |
| 8  | 113697682 | 113697682 | + | T | T |
| 20 | 36624803  | 36624803  | + | G | G |
| 11 | 16877444  | 16877444  | + | G | G |
| 20 | 26084094  | 26084094  | + | T | T |
| 21 | 41684167  | 41684167  | + | G | G |
| 17 | 78867626  | 78867626  | + | C | C |
| 17 | 42293287  | 42293287  | + | C | C |
| 5  | 112824042 | 112824042 | + | T | T |
| 13 | 98658520  | 98658520  | + | C | C |
| 17 | 48828018  | 48828018  | + | A | A |
| 16 | 69373655  | 69373655  | + | C | C |
| 17 | 39406130  | 39406130  | + | G | G |
| 9  | 33795585  | 33795585  | + | T | T |

|            |           |           |   |   |   |
|------------|-----------|-----------|---|---|---|
| 12         | 122848656 | 122848656 | + | T | T |
| 8          | 33370995  | 33370995  | + | C | C |
| 8          | 94935040  | 94935040  | + | G | G |
| GL000211.1 | 86122     | 86122     | + | G | G |
| 2          | 160080800 | 160080800 | + | C | C |
| 4          | 168155350 | 168155350 | + | T | T |
| 21         | 35468701  | 35468701  | + | G | G |
| 21         | 46011562  | 46011562  | + | G | G |
| 4          | 3948489   | 3948489   | + | A | A |
| 12         | 92018     | 92018     | + | T | T |
| 7          | 150763944 | 150763944 | + | G | G |
| 2          | 89082281  | 89082281  | + | T | T |
| 1          | 7796570   | 7796570   | + | C | C |
| 1          | 183253915 | 183253915 | + | C | C |
| 22         | 18842337  | 18842337  | + | G | G |
| 5          | 148407024 | 148407024 | + | C | C |
| 7          | 114270000 | 114270000 | + | G | G |
| 17         | 76570824  | 76570824  | + | C | C |
| 5          | 172517483 | 172517483 | + | T | T |
| 19         | 14887656  | 14887656  | + | G | G |
| 9          | 68414553  | 68414553  | + | T | T |
| 19         | 4653077   | 4653077   | + | A | A |
| 14         | 107062388 | 107062388 | + | C | C |
| 12         | 6881957   | 6881957   | + | T | T |
| 15         | 37110216  | 37110216  | + | C | C |
| 1          | 16961618  | 16961618  | + | C | C |
| 17         | 78272207  | 78272207  | + | G | G |
| 7          | 140508745 | 140508745 | + | C | C |
| 1          | 10132207  | 10132207  | + | C | C |
| 16         | 9057131   | 9057131   | + | C | C |
| 1          | 22987510  | 22987510  | + | C | C |
| 2          | 96557442  | 96557442  | + | C | C |
| 7          | 151962266 | 151962266 | + | G | G |
| 2          | 97830177  | 97830177  | + | G | G |
| GL000205.1 | 116660    | 116660    | + | T | T |
| 17         | 78272278  | 78272278  | + | G | G |
| 14         | 75416173  | 75416173  | + | C | C |
| GL000219.1 | 56969     | 56969     | + | C | C |
| 7          | 157000198 | 157000198 | + | C | C |
| 14         | 105414154 | 105414154 | + | C | C |
| 1          | 162769603 | 162769603 | + | G | G |
| 7          | 140508714 | 140508714 | + | C | C |
| 19         | 14887682  | 14887682  | + | A | A |



|            |           |           |   |   |   |
|------------|-----------|-----------|---|---|---|
| 9          | 68414564  | 68414564  | + | C | C |
| GL000219.1 | 99348     | 99348     | + | G | G |
| 17         | 65871861  | 65871861  | + | G | G |
| 12         | 8543224   | 8543224   | + | T | T |
| 19         | 6456505   | 6456505   | + | C | C |
| 9          | 68414530  | 68414530  | + | A | A |
| 4          | 65170948  | 65170948  | + | G | G |
| 5          | 140574388 | 140574388 | + | G | G |
| 8          | 26628125  | 26628125  | + | G | G |
| 5          | 1878662   | 1878662   | + | G | G |
| 12         | 79685827  | 79685827  | + | G | G |
| 5          | 41199993  | 41199993  | + | G | G |
| 5          | 1065412   | 1065412   | + | C | C |
| 17         | 65871039  | 65871039  | + | T | T |
| 5          | 1878880   | 1878880   | + | G | G |
| 7          | 140507861 | 140507861 | + | C | C |
| 22         | 36962401  | 36962401  | + | T | T |
| 10         | 60573784  | 60573784  | + | C | C |
| 17         | 61957912  | 61957912  | + | C | C |
| 20         | 30449239  | 30449239  | + | G | G |
| 7          | 98882468  | 98882468  | + | G | G |
| 7          | 140507810 | 140507810 | + | C | C |
| 12         | 8543219   | 8543219   | + | A | A |
| 7          | 150325503 | 150325503 | + | G | G |
| 10         | 17645891  | 17645891  | + | A | A |
| 17         | 78269373  | 78269373  | + | G | G |
| 17         | 77021970  | 77021970  | + | T | T |
| 19         | 6458305   | 6458305   | + | C | C |
| GL000219.1 | 99332     | 99332     | + | C | C |
| 14         | 73726059  | 73726059  | + | C | C |
| 1          | 10355740  | 10355740  | + | C | C |
| 2          | 75893097  | 75893097  | + | A | A |
| 1          | 145209344 | 145209344 | + | C | C |
| 21         | 11026800  | 11026800  | + | C | C |
| 1          | 153923907 | 153923907 | + | C | C |
| 17         | 78268580  | 78268580  | + | G | G |
| 4          | 65188446  | 65188446  | + | C | C |
| 7          | 51150846  | 51150846  | + | C | C |
| 17         | 32687504  | 32687504  | + | T | T |
| 7          | 142572702 | 142572702 | + | C | C |
| 14         | 24634148  | 24634148  | + | C | C |
| 5          | 1065411   | 1065411   | + | C | C |
| 11         | 67397219  | 67397219  | + | C | C |

7

143771660

143771660

+

G

G

---

| <b>Tumor Seq Allele2</b> | <b>cDNA Change</b> | <b>Codon Change</b>     |
|--------------------------|--------------------|-------------------------|
| -                        | c.572delA          | c.(571-573)aatfs        |
| -                        | c.6331_6333delCAG  | c.(6331-6333)cagdel     |
| -                        | c.2145_2147delGGA  | c.(2143-2148)gaggac>gac |
| CGC                      | c.2112_2113insGCG  | c.(2110-2115)insGCG     |
| T                        | c.1164_splice      | c.e3+1                  |
| T                        | c.1980G>T          | c.(1978-1980)ctG>ctT    |
| T                        | c.781G>A           | c.(781-783)Ggg>Agg      |
| T                        | c.9000G>A          | c.(8998-9000)tgG>tgA    |
| A                        | c.101G>A           | c.(100-102)cGg>cAg      |
| T                        | c.3717C>T          | c.(3715-3717)atC>atT    |
| A                        | c.3697C>T          | c.(3697-3699)Cct>Tct    |
| T                        | c.454C>T           | c.(454-456)Cta>Tta      |
| A                        | c.4986G>A          | c.(4984-4986)gtG>gtA    |
| T                        | c.62_splice        | c.e3-1                  |
| G                        | c.3163T>C          | c.(3163-3165)Ttt>Ctt    |
| T                        | c.1118G>A          | c.(1117-1119)cGa>cAa    |
| T                        | c.944G>A           | c.(943-945)gGc>gAc      |
| T                        | c.1111C>A          | c.(1111-1113)Cgg>Agg    |
| A                        | c.1021C>A          | c.(1021-1023)Cgg>Agg    |
| T                        | c.1269G>A          | c.(1267-1269)gaG>gaA    |
| A                        |                    |                         |
| A                        | c.1475G>A          | c.(1474-1476)tGg>tAg    |
| A                        | c.824C>T           | c.(823-825)tCc>tTc      |
| A                        | c.962G>A           | c.(961-963)gGc>gAc      |
| A                        | c.239G>A           | c.(238-240)cGa>cAa      |
| G                        | c.855T>G           |                         |
| A                        | c.39227C>T         |                         |
| A                        | c.1811G>A          | c.(1810-1812)cGc>cAc    |
| A                        | c.3519C>T          | c.(3517-3519)gcC>gcT    |
| A                        | c.31819C>T         |                         |
| A                        |                    |                         |
| T                        | c.607G>A           | c.(607-609)Gaa>Aaa      |
| T                        | c.524C>T           | c.(523-525)cCg>cTg      |
| T                        | c.1814C>T          | c.(1813-1815)tCc>tTc    |
| A                        | c.180G>A           | c.(178-180)ctG>ctA      |
| T                        | c.130C>T           | c.(130-132)Cga>Tga      |
| A                        |                    |                         |
| A                        | c.2111C>T          | c.(2110-2112)gCg>gTg    |
| T                        | c.1086C>T          | c.(1084-1086)ttC>ttT    |
| A                        | c.3252G>A          | c.(3250-3252)gaG>gaA    |

|   |           |                      |
|---|-----------|----------------------|
| A | c.100G>A  | c.(100-102)Gag>Aag   |
| T | c.41C>T   | c.(40-42)cCc>cTc     |
| A | c.3268G>A | c.(3268-3270)Gag>Aag |
| T | c.1018G>A | c.(1018-1020)Gta>Ata |
| T | c.1539C>T | c.(1537-1539)acC>acT |
| A | c.2261C>A | c.(2260-2262)cCg>cAg |
| T | c.1658C>T | c.(1657-1659)gCc>gTc |
| T | c.1452G>T | c.(1450-1452)gaG>gaT |
| A | c.404C>T  | c.(403-405)tCt>tTt   |
| T |           |                      |
| T | c.57G>A   | c.(55-57)gaG>gaA     |
| T | c.346C>T  | c.(346-348)Ccg>Tcg   |
| A | c.78G>A   | c.(76-78)cgG>cgA     |
| A |           |                      |
| A | c.603C>T  | c.(601-603)atC>atT   |
| T | c.1069G>A | c.(1069-1071)Gat>Aat |
| A | c.64G>A   | c.(64-66)Gaa>Aaa     |
| G | c.4120A>G | c.(4120-4122)Act>Gct |
| A | c.804G>T  | c.(802-804)ctG>ctT   |
| A | c.1754G>A | c.(1753-1755)gGg>gAg |
| A | c.298G>A  | c.(298-300)Gcc>Acc   |
| T | c.624C>T  | c.(622-624)ccC>ccT   |
| A | c.288C>T  | c.(286-288)acC>acT   |
| A |           |                      |
| C |           |                      |
| A | c.1102A>T | c.(1102-1104)Att>Ttt |
| A |           |                      |
| A | c.2910G>A |                      |
| A | c.2026G>A | c.(2026-2028)Gga>Aga |
| T |           |                      |
| T | c.3763G>A | c.(3763-3765)Gca>Aca |
| A |           |                      |
| T | c.1211C>T | c.(1210-1212)gCc>gTc |
| A | c.1106G>T | c.(1105-1107)aGa>aTa |
| A |           |                      |
| A | c.3127G>A | c.(3127-3129)Gag>Aag |
| A | c.1514C>T | c.(1513-1515)tCc>tTc |
| C | c.5829A>C | c.(5827-5829)cgA>cgC |
| A | c.1018G>A | c.(1018-1020)Gac>Aac |
| T | c.646C>A  | c.(646-648)Cag>Aag   |
| A | c.300G>A  | c.(298-300)cgG>cgA   |
| A | c.2919C>T | c.(2917-2919)acC>acT |
| T | c.253G>A  | c.(253-255)Gga>Aga   |

|   |            |                        |
|---|------------|------------------------|
| T |            |                        |
| A |            |                        |
| T | c.1104T>A  | c.(1102-1104)gaT>gaA   |
| T | c.1799T>A  | c.(1798-1800)gTg>gAg   |
| A | c.2800G>A  | c.(2800-2802)Gac>Aac   |
| T | c.223G>A   | c.(223-225)Gag>Aag     |
| A | c.596C>T   | c.(595-597)tCc>tTc     |
| T | c.741G>A   | c.(739-741)tgG>tgA     |
| T | c.8999G>A  | c.(8998-9000)tGg>tAg   |
| T | c.113G>A   | c.(112-114)gGa>gAa     |
| T | c.6580C>T  | c.(6580-6582)Cga>Tga   |
| A | c.2277C>T  | c.(2275-2277)ctC>ctT   |
| A | c.2201G>A  | c.(2200-2202)cGc>cAc   |
| T | c.743G>A   | c.(742-744)gGa>gAa     |
| G | c.846A>G   | c.(844-846)ccA>ccG     |
| T |            |                        |
| T | c.2466C>T  | c.(2464-2466)atC>atT   |
| T | c.3327G>T  | c.(3325-3327)gtG>gtT   |
| A | c.23852G>T | c.(23851-23853)aGg>aTg |
| T | c.1471C>T  | c.(1471-1473)Ctg>Ttg   |
| A | c.1357C>T  |                        |
| T | c.175G>T   | c.(175-177)Gaa>Taa     |
| T | c.249G>A   | c.(247-249)aaG>aaA     |
| T | c.647C>T   | c.(646-648)tCc>tTc     |
| T | c.1128C>T  | c.(1126-1128)acC>acT   |
| T | c.653C>T   | c.(652-654)tCc>tTc     |
| T |            |                        |
| A | c.2828G>A  | c.(2827-2829)gGa>gAa   |
| A | c.1599C>T  | c.(1597-1599)tcC>tcT   |
| T | c.654C>T   | c.(652-654)tcC>tcT     |
| T | c.1303C>T  | c.(1303-1305)Ctg>Ttg   |
| T | c.1706C>T  | c.(1705-1707)tCc>tTc   |
| T | c.130C>T   | c.(130-132)Cct>Tct     |
| A | c.315G>A   | c.(313-315)tgG>tgA     |
| A | c.620G>A   | c.(619-621)cGc>cAc     |
| G | c.3916T>G  | c.(3916-3918)Tcc>Gcc   |
| T | c.307G>A   | c.(307-309)Gga>Aga     |
| A | c.286G>A   | c.(286-288)Gag>Aag     |
| T | c.34759G>A | c.(34759-34761)Gaa>Aaa |
| A | c.150G>A   | c.(148-150)gaG>gaA     |
| T | c.2127G>A  | c.(2125-2127)ggG>ggA   |
| T | c.2819G>T  | c.(2818-2820)tGg>tTg   |
| T |            |                        |

|   |            |                        |
|---|------------|------------------------|
| A |            |                        |
| C | c.6898T>C  | c.(6898-6900)Tcc>Ccc   |
| T | c.955C>A   | c.(955-957)Cag>Aag     |
| T | c.407G>A   | c.(406-408)gGa>gAa     |
| A |            |                        |
| A | c.457G>A   | c.(457-459)Gac>Aac     |
| T | c.5455C>A  | c.(5455-5457)Cag>Aag   |
| T | c.4285C>T  | c.(4285-4287)Caa>Taa   |
| T | c.817C>T   | c.(817-819)Cga>Tga     |
| A | c.450C>T   | c.(448-450)gcC>gcT     |
| T | c.10737G>A | c.(10735-10737)gtG>gtA |
| A | c.771G>A   | c.(769-771)gcG>gcA     |
| A | c.1238G>A  | c.(1237-1239)gGc>gAc   |
| A |            |                        |
| T | c.335C>T   | c.(334-336)tCc>tTc     |
| T | c.655C>T   | c.(655-657)Cgt>Tgt     |
| T | c.1561C>A  | c.(1561-1563)Cag>Aag   |
| A | c.331G>A   | c.(331-333)Gaa>Aaa     |
| A | c.9988G>A  | c.(9988-9990)Ggg>Agg   |
| A | c.543C>T   | c.(541-543)ttC>ttT     |
| T | c.998C>T   | c.(997-999)cCg>cTg     |
| T | c.1772C>T  | c.(1771-1773)tCa>tTa   |
| A | c.2277G>A  | c.(2275-2277)gtG>gtA   |
| A | c.859C>T   | c.(859-861)Ccg>Tcg     |
| A |            |                        |
| T | c.2430G>A  | c.(2428-2430)ccG>ccA   |
| C | c.273A>G   | c.(271-273)aaA>aaG     |
| A | c.843G>A   | c.(841-843)ccG>ccA     |
| T | c.1889C>T  | c.(1888-1890)tCc>tTc   |
| T | c.2260G>A  | c.(2260-2262)Gac>Aac   |
| T |            |                        |
| T | c.3774C>T  | c.(3772-3774)ccC>ccT   |
| T | c.2992G>T  | c.(2992-2994)Gaa>Taa   |
| T | c.1284C>T  | c.(1282-1284)ttC>ttT   |
| A | c.1232G>A  | c.(1231-1233)cGc>cAc   |
| G |            |                        |
| T | c.369C>T   | c.(367-369)gtC>gtT     |
| T | c.211G>A   | c.(211-213)Gct>Act     |
| A |            |                        |
| A | c.591C>T   | c.(589-591)ttC>ttT     |
| C |            |                        |
| A | c.1753G>A  | c.(1753-1755)Ggg>Agg   |
| T | c.1648C>T  | c.(1648-1650)Cct>Tct   |

|   |                                                           |                          |
|---|-----------------------------------------------------------|--------------------------|
| A | c.967C>T                                                  | c.(967-969)Cgg>Tgg       |
| A | c.189C>T                                                  | c.(187-189)ttC>ttT       |
| T | c.2055G>A                                                 | c.(2053-2055)ccG>ccA     |
| C | c.1952T>C                                                 | c.(1951-1953)gTg>gCg     |
| T | c.999G>T                                                  | c.(997-999)gtG>gtT       |
| A | c.1205G>A                                                 | c.(1204-1206)gGg>gAg     |
| A | c.3611C>T                                                 | c.(3610-3612)aCg>aTg     |
| T | c.523C>T                                                  | c.(523-525)Cgt>Tgt       |
| A | c.1214G>A                                                 | c.(1213-1215)cGa>cAa     |
| T | c.594_splice                                              | c.e5-1                   |
| - | c.516delTATTTAAATATCTG/..(496-516)ttatttaaataatctgacaatf: |                          |
| - | c.1296_1297delCA                                          | c.(1294-1299)cgcacafs    |
| - | c.3293delT                                                | c.(3292-3294)gtafs       |
| - | c.346delC                                                 | c.(346-348)cgtrfs        |
| - | c.341delC                                                 | c.(340-342)ccgfs         |
| - | c.1396_1402delATCTTCT                                     | c.(1396-1404)atcttctgcfs |
| - | c.969delC                                                 | c.(967-969)ttcfs         |
| - | c.598delT                                                 | c.(598-600)tttfs         |
| - | c.1delTTAAAGCCCTAAAGAAGG)1-627)tttaaagccctaaagaaggttgcg   |                          |
| - | c.767delC                                                 | c.(766-768)gccfs         |
| - | c.6delAAGGAAAAGACGAAGG)6-831)gaaaggaaaagacgaagggaaga      |                          |
| - | c.432delC                                                 | c.(430-432)tacfs         |
| - | c.106delT                                                 | c.(106-108)ttgfs         |
| - | c.291_294delCCCC                                          | c.(289-294)ggccccfs      |
| A | c.575G>A                                                  | c.(574-576)aGg>aAg       |
| T | c.839G>A                                                  | c.(838-840)aGa>aAa       |
| A | c.210C>T                                                  | c.(208-210)ttC>ttT       |
| T |                                                           |                          |
| T | c.111G>A                                                  | c.(109-111)gtG>gtA       |
| C | c.511A>G                                                  | c.(511-513)Aat>Gat       |
| A | c.2968C>T                                                 | c.(2968-2970)Cct>Tct     |
| A | c.2812C>T                                                 | c.(2812-2814)Cga>Tga     |
| A | c.703C>T                                                  | c.(703-705)Cgg>Tgg       |
| A | c.62C>T                                                   | c.(61-63)tCc>tTc         |
| T | c.633C>T                                                  | c.(631-633)ttC>ttT       |
| T | c.636C>T                                                  | c.(634-636)ctC>ctT       |
| A | c.1008C>T                                                 | c.(1006-1008)ttC>ttT     |
| T | c.473C>T                                                  | c.(472-474)tCc>tTc       |
| A | c.565C>T                                                  | c.(565-567)Cac>Tac       |
| A | c.49G>T                                                   | c.(49-51)Gag>Tag         |
| C | c.3968A>G                                                 | c.(3967-3969)aAt>aGt     |
| T | c.402A>T                                                  | c.(400-402)aaA>aaT       |
| A | c.765C>T                                                  | c.(763-765)ggC>ggT       |

|   |           |                      |
|---|-----------|----------------------|
| T | c.3261C>T | c.(3259-3261)ggC>ggT |
| A | c.555G>A  | c.(553-555)tgG>tgA   |
| T | c.5558C>T | c.(5557-5559)tCa>tTa |
| T | c.364G>A  | c.(364-366)Gat>Aat   |
| T | c.9C>T    | c.(7-9)ttC>ttT       |
| A | c.734G>A  | c.(733-735)gGa>gAa   |
| A | c.6501G>A | c.(6499-6501)caG>caA |
| T | c.1823G>A | c.(1822-1824)gGa>gAa |
| A | c.871C>T  | c.(871-873)Ctc>Ttc   |
| T | c.686G>A  | c.(685-687)aGg>aAg   |
| A |           |                      |
| T |           |                      |
| T | c.209G>A  | c.(208-210)gGa>gAa   |
| T | c.4718C>T | c.(4717-4719)tCg>tTg |
| A | c.6329C>T | c.(6328-6330)gCc>gTc |
| T | c.230C>T  | c.(229-231)tCc>tTc   |
| T | c.863C>T  | c.(862-864)cCc>cTc   |
| T | c.58G>A   | c.(58-60)Ggg>Agg     |
| T | c.526G>A  | c.(526-528)Gaa>Aaa   |
| T | c.791C>T  | c.(790-792)tCg>tTg   |
| T | c.507C>T  | c.(505-507)ttC>ttT   |
| T | c.853G>A  | c.(853-855)Gac>Aac   |
| A | c.493C>T  | c.(493-495)Ccc>Tcc   |
| A | c.33G>A   | c.(31-33)cgG>cgA     |
| T | c.862C>T  | c.(862-864)Cct>Tct   |
| A | c.1021G>A | c.(1021-1023)Ggg>Agg |
| T | c.3733G>A | c.(3733-3735)Gaa>Aaa |
| C |           |                      |
| T |           |                      |
| T |           |                      |
| T | c.97C>T   | c.(97-99)Ccc>Tcc     |
| A | c.214G>A  | c.(214-216)Gac>Aac   |
| A | c.505G>A  | c.(505-507)Ggc>Agc   |
| A | c.639C>T  | c.(637-639)atC>atT   |
| T | c.626C>T  | c.(625-627)tCt>tTt   |
| A | c.41G>A   | c.(40-42)gGa>gAa     |
| T | c.2581G>A | c.(2581-2583)Gaa>Aaa |
| T | c.750G>A  | c.(748-750)gaG>gaA   |
| A | c.8257T>A | c.(8257-8259)Tta>Ata |
| A |           |                      |
| T | c.826G>A  | c.(826-828)Ggt>Agt   |
| A | c.126G>A  | c.(124-126)gaG>gaA   |
| T | c.7011C>T | c.(7009-7011)ttC>ttT |



|   |            |                        |
|---|------------|------------------------|
| A | c.18C>T    | c.(16-18)tcC>tcT       |
| A | c.789C>T   | c.(787-789)ccC>ccT     |
| A | c.2010C>T  | c.(2008-2010)atC>atT   |
| A | c.1906G>A  | c.(1906-1908)Gag>Aag   |
| A | c.4381G>A  | c.(4381-4383)Gat>Aat   |
| A | c.792C>T   | c.(790-792)ctC>ctT     |
| T |            |                        |
| A | c.404G>A   | c.(403-405)gGg>gAg     |
| A | c.146C>T   | c.(145-147)cCt>cTt     |
| A | c.571C>T   | c.(571-573)Ccg>Tcg     |
| A | c.23193C>T | c.(23191-23193)atC>atT |
| A | c.269G>A   | c.(268-270)aGg>aAg     |
| A | c.856C>T   | c.(856-858)Cgt>Tgt     |
| C | c.1522T>C  | c.(1522-1524)Tca>Cca   |
| A | c.956T>A   | c.(955-957)gTg>gAg     |
| T | c.9006G>A  | c.(9004-9006)gaG>gaA   |
| A | c.2007C>T  | c.(2005-2007)ctC>ctT   |
| C | c.329C>G   | c.(328-330)tCt>tGt     |
| A | c.71A>T    | c.(70-72)aAa>aTa       |
| A | c.126C>T   | c.(124-126)tcC>tcT     |
| A | c.9C>T     | c.(7-9)gcC>gcT         |
| T | c.345C>T   | c.(343-345)atC>atT     |
| A | c.1469G>A  | c.(1468-1470)cGg>cAg   |
| A |            |                        |
| A | c.1695G>A  | c.(1693-1695)aaG>aaA   |
| A | c.1210G>A  | c.(1210-1212)Gag>Aag   |
| T | c.1258G>A  | c.(1258-1260)Gga>Aga   |
| A | c.5685C>T  | c.(5683-5685)tcC>tcT   |
| T | c.1603G>A  | c.(1603-1605)Gaa>Aaa   |
| A |            |                        |
| T | c.1026G>A  | c.(1024-1026)agG>agA   |
| T | c.9445G>A  | c.(9445-9447)Gaa>Aaa   |
| A | c.2275C>T  | c.(2275-2277)Cct>Tct   |
| T | c.3415G>A  | c.(3415-3417)Gat>Aat   |
| T | c.427C>T   | c.(427-429)Ctg>Ttg     |
| A | c.1072C>T  | c.(1072-1074)Caa>Taa   |
| A | c.166G>A   | c.(166-168)Gcc>Acc     |
| T | c.439C>T   | c.(439-441)Cat>Tat     |
| A | c.348G>A   | c.(346-348)aaG>aaA     |
| A | c.2972C>T  | c.(2971-2973)cCc>cTc   |
| A | c.4732T>A  | c.(4732-4734)Ttt>Att   |
| A | c.697G>A   | c.(697-699)Gaa>Aaa     |
| C |            |                        |

|   |              |                      |
|---|--------------|----------------------|
| A | c.5776G>A    | c.(5776-5778)Gag>Aag |
| C |              |                      |
| A |              |                      |
| C | c.4957C>G    | c.(4957-4959)Cct>Gct |
| A | c.274C>T     | c.(274-276)Ctc>Ttc   |
| T |              |                      |
| A | c.1969G>A    | c.(1969-1971)Gag>Aag |
| C | c.137G>C     | c.(136-138)gGa>gCa   |
| A | c.293G>A     | c.(292-294)tGg>tAg   |
| A | c.525C>T     | c.(523-525)atC>atT   |
| T | c.683G>A     | c.(682-684)aGa>aAa   |
| T | c.1710G>A    | c.(1708-1710)gtG>gtA |
| A | c.378G>A     | c.(376-378)aaG>aaA   |
| T |              |                      |
| T | c.9696G>A    | c.(9694-9696)ggG>ggA |
| G | c.1067A>G    | c.(1066-1068)tAa>tGa |
| T | c.1683C>T    | c.(1681-1683)ttC>ttT |
| T | c.305C>T     | c.(304-306)tCc>tTc   |
| A | c.202G>A     | c.(202-204)Gaa>Aaa   |
| T | c.1273C>T    | c.(1273-1275)Cag>Tag |
| T | c.3401G>A    | c.(3400-3402)gGg>gAg |
| A | c.3023C>T    | c.(3022-3024)tCc>tTc |
| T | c.1405C>T    | c.(1405-1407)Ctg>Ttg |
| T | c.2054C>A    | c.(2053-2055)gCc>gAc |
| A | c.7533G>A    | c.(7531-7533)agG>agA |
| A | c.538C>T     | c.(538-540)Cct>Tct   |
| C |              |                      |
| T | c.1646G>A    | c.(1645-1647)gGa>gAa |
| A | c.911G>A     | c.(910-912)aGa>aAa   |
| T | c.13128G>A   |                      |
| A | c.247_splice | c.e4-1               |
| T | c.629G>A     | c.(628-630)cGa>cAa   |
| T | c.582G>A     | c.(580-582)gtG>gtA   |
| T | c.831C>T     | c.(829-831)tcC>tcT   |
| T | c.1038G>A    | c.(1036-1038)gaG>gaA |
| T | c.1805G>A    | c.(1804-1806)gGg>gAg |
| A | c.1268G>A    | c.(1267-1269)gGg>gAg |
| A | c.2191C>T    | c.(2191-2193)Cat>Tat |
| A | c.511_splice | c.e4-1               |
| T | c.211G>A     | c.(211-213)Gaa>Aaa   |
| A | c.592C>T     | c.(592-594)Ctt>Ttt   |
| A | c.2673G>A    | c.(2671-2673)agG>agA |
| A | c.251C>T     | c.(250-252)tCc>tTc   |

|   |               |                        |
|---|---------------|------------------------|
| A |               |                        |
| A | c.6256G>A     | c.(6256-6258)Gaa>Aaa   |
| A |               |                        |
| T | c.619C>T      | c.(619-621)Ccc>Tcc     |
| A | c.76778C>T    | c.(76777-76779)cCt>cTt |
| T | c.1479G>A     | c.(1477-1479)aaG>aaA   |
| T | c.163G>A      | c.(163-165)Gat>Aat     |
| A |               |                        |
| T | c.2892C>T     | c.(2890-2892)gcC>gcT   |
| T | c.1176G>A     | c.(1174-1176)atG>atA   |
| T | c.315C>T      | c.(313-315)tcC>tcT     |
| T | c.321G>A      | c.(319-321)ctG>ctA     |
| C | c.2448T>C     | c.(2446-2448)ccT>ccC   |
| A | c.309G>A      | c.(307-309)cgG>cgA     |
| T |               |                        |
| A | c.2494_splice | c.e12+1                |
| T | c.6981G>A     | c.(6979-6981)aaG>aaA   |
| T | c.2642C>T     | c.(2641-2643)tCc>tTc   |
| G | c.3987A>G     | c.(3985-3987)aaA>aaG   |
| T | c.89C>A       | c.(88-90)cCc>cAc       |
| A | c.1423A>T     | c.(1423-1425)Aac>Tac   |
| T | c.64C>T       | c.(64-66)Ccg>Tcg       |
| A | c.3356C>T     | c.(3355-3357)cCt>cTt   |
| A | c.1631C>T     | c.(1630-1632)cCa>cTa   |
| T | c.5261_splice | c.e34+1                |
| T | c.648G>A      | c.(646-648)aaG>aaA     |
| A | c.952G>A      | c.(952-954)Gaa>Aaa     |
| A |               |                        |
| A | c.2842C>T     | c.(2842-2844)Cag>Tag   |
| T | c.149G>A      | c.(148-150)gGg>gAg     |
| A | c.3066G>A     | c.(3064-3066)ttG>ttA   |
| T | c.647C>T      | c.(646-648)gCt>gTt     |
| T | c.61975G>A    | c.(61975-61977)Gag>Aag |
| T | c.874C>T      | c.(874-876)Ccg>Tcg     |
| T | c.2006C>T     | c.(2005-2007)tCt>tTt   |
| T | c.760G>A      | c.(760-762)Gaa>Aaa     |
| A | c.1757G>A     | c.(1756-1758)tGg>tAg   |
| A | c.207G>A      | c.(205-207)agG>agA     |
| T | c.1029C>T     | c.(1027-1029)ctC>ctT   |
| A | c.698G>A      | c.(697-699)gGc>gAc     |
| T | c.2408C>T     | c.(2407-2409)tCt>tTt   |
| T | c.3221C>T     | c.(3220-3222)tCc>tTc   |
| T |               |                        |

|   |               |                        |
|---|---------------|------------------------|
| A | c.179T>A      | c.(178-180)gTa>gAa     |
| A | c.536G>A      | c.(535-537)cGa>cAa     |
| A | c.3067C>T     | c.(3067-3069)Ccg>Tcg   |
| T | c.1217C>T     | c.(1216-1218)cCc>cTc   |
| A | c.304G>A      | c.(304-306)Gaa>Aaa     |
| T | c.322C>T      | c.(322-324)Cgt>Tgt     |
| A | c.2103C>T     | c.(2101-2103)ttC>ttT   |
| C | c.13238T>C    | c.(13237-13239)tTa>tCa |
| A |               |                        |
| T | c.398C>T      | c.(397-399)tCa>tTa     |
| T |               |                        |
| T | c.1272C>T     | c.(1270-1272)tcC>tcT   |
| T | c.2632G>A     | c.(2632-2634)Gat>Aat   |
| T | c.2058C>T     | c.(2056-2058)ctC>ctT   |
| A | c.1099C>T     | c.(1099-1101)Ctg>Ttg   |
| A |               |                        |
| T | c.2911G>A     | c.(2911-2913)Gaa>Aaa   |
| T | c.265C>T      | c.(265-267)Ccc>Tcc     |
| A | c.570G>A      | c.(568-570)aaG>aaA     |
| T |               |                        |
| T | c.446C>T      | c.(445-447)tCc>tTc     |
| A | c.76777C>T    | c.(76777-76779)Cct>Tct |
| A |               |                        |
| A | c.1169C>T     | c.(1168-1170)cCa>cTa   |
| T | c.395C>T      | c.(394-396)cCc>cTc     |
| T | c.29G>A       | c.(28-30)gGa>gAa       |
| T | c.1004_splice | c.e6-1                 |
| A | c.6373G>A     | c.(6373-6375)Gaa>Aaa   |
| T | c.2649C>T     | c.(2647-2649)ctC>ctT   |
| A |               |                        |
| A | c.469A>T      | c.(469-471)Atg>Ttg     |
| A |               |                        |
| T | c.1511C>T     | c.(1510-1512)tCc>tTc   |
| A | c.3872G>A     | c.(3871-3873)cGa>cAa   |
| T | c.2266G>A     | c.(2266-2268)Gaa>Aaa   |
| T | c.1007C>T     | c.(1006-1008)tCc>tTc   |
| A | c.608G>A      | c.(607-609)cGg>cAg     |
| T | c.351C>T      | c.(349-351)tcC>tcT     |
| A | c.234C>T      | c.(232-234)ctC>ctT     |
| A | c.258C>T      | c.(256-258)atC>atT     |
| T | c.682C>T      | c.(682-684)Ctg>Ttg     |
| T | c.1911G>A     | c.(1909-1911)ctG>ctA   |
| T | c.492C>T      | c.(490-492)tcC>tcT     |

|   |           |                      |
|---|-----------|----------------------|
| A | c.1071G>A | c.(1069-1071)caG>caA |
| A | c.1644G>A | c.(1642-1644)aaG>aaA |
| C | c.1120A>G | c.(1120-1122)Att>Gtt |
| T | c.472G>A  | c.(472-474)Gac>Aac   |
| A | c.1146C>T | c.(1144-1146)tcC>tcT |
| A | c.925C>T  | c.(925-927)Ccg>Tcg   |
| A | c.5721G>A | c.(5719-5721)gaG>gaA |
| A | c.5368C>T | c.(5368-5370)Cat>Tat |
| A | c.344C>T  | c.(343-345)tCc>tTc   |
| T | c.9316G>A | c.(9316-9318)Gga>Aga |
| A | c.800C>T  | c.(799-801)tCt>tTt   |
| T | c.352G>A  | c.(352-354)Gat>Aat   |
| T | c.1021G>A | c.(1021-1023)Gaa>Aaa |
| A | c.184G>T  | c.(184-186)Gga>Tga   |
| T | c.2491C>T | c.(2491-2493)Cct>Tct |
| T | c.399C>T  | c.(397-399)atC>atT   |
| G | c.1671T>C | c.(1669-1671)agT>agC |
| T | c.25C>T   | c.(25-27)Cat>Tat     |
| T | c.2213C>T | c.(2212-2214)cCc>cTc |
| A | c.5956G>T | c.(5956-5958)Gag>Tag |
| C | c.229A>G  | c.(229-231)Aag>Gag   |
| T | c.3078C>T | c.(3076-3078)ttC>ttT |
| T | c.346G>A  | c.(346-348)Gga>Aga   |
| A | c.7684C>T | c.(7684-7686)Cgc>Tgc |
| T | c.2590G>A | c.(2590-2592)Gat>Aat |
| T | c.1111G>A | c.(1111-1113)Gat>Aat |
| T |           |                      |
| G |           |                      |
| A | c.169C>T  | c.(169-171)Ccc>Tcc   |
| A | c.98C>T   | c.(97-99)gCc>gTc     |
| A |           |                      |
| T | c.1233C>T | c.(1231-1233)ccC>ccT |
| T | c.487G>A  | c.(487-489)Gag>Aag   |
| A | c.797G>A  | c.(796-798)gGa>gAa   |
| A | c.990C>T  | c.(988-990)atC>atT   |
| A | c.416C>T  | c.(415-417)tCc>tTc   |
| T |           |                      |
| T | c.639G>A  | c.(637-639)ttG>ttA   |
| T | c.799G>A  | c.(799-801)Gaa>Aaa   |
| T | c.665C>T  | c.(664-666)tCc>tTc   |
| A | c.787C>T  | c.(787-789)Cgg>Tgg   |
| A | c.8C>T    | c.(7-9)aCc>aTc       |
| A | c.1123C>A | c.(1123-1125)Ctc>Atc |

|   |               |                      |
|---|---------------|----------------------|
| A | c.1341_splice | c.e13+1              |
| A | c.828G>A      | c.(826-828)aaG>aaA   |
| A | c.276C>T      | c.(274-276)ctC>ctT   |
| A | c.577C>T      | c.(577-579)Ctg>Ttg   |
| A | c.217G>A      | c.(217-219)Gag>Aag   |
| T | c.333C>T      | c.(331-333)ttC>ttT   |
| T |               |                      |
| A | c.1400C>T     | c.(1399-1401)cCa>cTa |
| T | c.134C>T      | c.(133-135)tCc>tTc   |
| G | c.1107T>C     | c.(1105-1107)gaT>gaC |
| G | c.987C>G      | c.(985-987)caC>caG   |
| T | c.426G>A      | c.(424-426)atG>atA   |
| A | c.1546C>T     | c.(1546-1548)Cat>Tat |
| T | c.389G>A      | c.(388-390)cGa>cAa   |
| T | c.882G>A      | c.(880-882)tgG>tgA   |
| A | c.1422G>A     | c.(1420-1422)agG>agA |
| A | c.149C>T      | c.(148-150)tCg>tTg   |
| T | c.880A>T      | c.(880-882)Aac>Tac   |
| A |               |                      |
| T | c.374C>A      | c.(373-375)cCa>cAa   |
| T | c.788C>T      | c.(787-789)cCg>cTg   |
| G |               |                      |
| A | c.679G>A      | c.(679-681)Ggc>Agc   |
| A | c.867C>T      | c.(865-867)ctC>ctT   |
| T |               |                      |
| A | c.1505C>T     | c.(1504-1506)tCc>tTc |
| A | c.2771C>T     |                      |
| A | c.1045G>A     | c.(1045-1047)Gga>Aga |
| A | c.1002G>A     | c.(1000-1002)ggG>ggA |
| A | c.710G>A      | c.(709-711)gGg>gAg   |
| T | c.1539G>A     | c.(1537-1539)tcG>tcA |
| A | c.2868G>A     | c.(2866-2868)gtG>gtA |
| A | c.299C>T      | c.(298-300)tCc>tTc   |
| A | c.2196C>T     | c.(2194-2196)tcC>tcT |
| T | c.369G>A      | c.(367-369)ctG>ctA   |
| T | c.472G>A      | c.(472-474)Gaa>Aaa   |
| T | c.742G>A      | c.(742-744)Gaa>Aaa   |
| A | c.1162G>A     | c.(1162-1164)Ggc>Agc |
| T | c.1662C>T     | c.(1660-1662)agC>agT |
| A | c.37C>T       | c.(37-39)Cta>Tta     |
| T | c.510G>A      | c.(508-510)tcG>tcA   |
| G |               |                      |
| A | c.1431C>T     | c.(1429-1431)gaC>gaT |

|   |               |                        |
|---|---------------|------------------------|
| A | c.1212G>A     | c.(1210-1212)ggG>ggA   |
| C | c.6021T>G     | c.(6019-6021)atT>atG   |
| T | c.681G>A      | c.(679-681)agG>agA     |
| A |               |                        |
| T | c.1568C>T     | c.(1567-1569)tCg>tTg   |
| A | c.1236C>T     | c.(1234-1236)ccC>ccT   |
| A | c.1033C>T     | c.(1033-1035)Cgt>Tgt   |
| A | c.442C>T      | c.(442-444)Cct>Tct     |
| A | c.194G>A      | c.(193-195)cGg>cAg     |
| T | c.1285C>T     | c.(1285-1287)Ccc>Tcc   |
| A | c.1096G>A     | c.(1096-1098)Gaa>Aaa   |
| G | c.13128A>G    | c.(13126-13128)caA>caG |
| T | c.1298C>T     | c.(1297-1299)aCc>aTc   |
| A | c.1169G>A     | c.(1168-1170)gGt>gAt   |
| T | c.653C>T      | c.(652-654)tCc>tTc     |
| A |               |                        |
| A | c.1861G>A     | c.(1861-1863)Gag>Aag   |
| T | c.408C>T      | c.(406-408)ttC>ttT     |
| A | c.663G>A      | c.(661-663)agG>agA     |
| A | c.1046G>A     | c.(1045-1047)gGa>gAa   |
| T | c.3710_splice | c.e24+1                |
| T | c.1932C>T     | c.(1930-1932)gcC>gcT   |
| T | c.784G>A      | c.(784-786)Gtt>Att     |
| C | c.3867T>C     | c.(3865-3867)gaT>gaC   |
| A | c.2456C>T     | c.(2455-2457)cCa>cTa   |
| C | c.67A>C       | c.(67-69)Aag>Cag       |
| T | c.58C>T       | c.(58-60)Cga>Tga       |
| T | c.2446C>T     | c.(2446-2448)Cct>Tct   |
| A | c.346C>T      | c.(346-348)Ctg>Ttg     |
| T |               |                        |
| A | c.3310A>T     | c.(3310-3312)Aat>Tat   |
| A | c.735C>T      | c.(733-735)ttC>ttT     |
| T | c.1633C>T     | c.(1633-1635)Cct>Tct   |
| T | c.3760C>T     | c.(3760-3762)Ctg>Ttg   |
| T | c.160G>A      | c.(160-162)Gag>Aag     |
| T |               |                        |
| T | c.1085T>A     | c.(1084-1086)cTc>cAc   |
| T | c.2653G>A     | c.(2653-2655)Gaa>Aaa   |
| C | c.731T>G      | c.(730-732)cTc>cGc     |
| T | c.2430C>T     | c.(2428-2430)tcC>tcT   |
| A | c.2404G>A     | c.(2404-2406)Gat>Aat   |
| A | c.1414G>A     | c.(1414-1416)Gaa>Aaa   |
| A | c.11035C>T    | c.(11035-11037)Cgt>Tgt |

|   |              |                        |
|---|--------------|------------------------|
| T | c.408G>A     | c.(406-408)agG>agA     |
| T | c.1539C>T    | c.(1537-1539)ctC>ctT   |
| T | c.860_splice | c.e3-1                 |
| A | c.1399A>T    | c.(1399-1401)Acc>Tcc   |
| C | c.330T>C     | c.(328-330)ctT>ctC     |
| A | c.408C>T     | c.(406-408)acC>acT     |
| G |              |                        |
| T | c.2049C>T    | c.(2047-2049)atC>atT   |
| A | c.1012C>T    | c.(1012-1014)Cca>Tca   |
| T | c.294C>T     | c.(292-294)tcC>tcT     |
| A | c.414C>T     | c.(412-414)tcC>tcT     |
| A | c.969C>T     | c.(967-969)agC>agT     |
| A | c.1418C>T    | c.(1417-1419)tCc>tTc   |
| G | c.761A>G     | c.(760-762)aAg>aGg     |
| A |              |                        |
| T | c.328C>T     | c.(328-330)Ccc>Tcc     |
| T | c.1594G>A    | c.(1594-1596)Gag>Aag   |
| A | c.5594C>T    | c.(5593-5595)tCa>tTa   |
| A | c.1840C>T    | c.(1840-1842)Cct>Tct   |
| T | c.743G>A     | c.(742-744)cGg>cAg     |
| A |              |                        |
| A |              |                        |
| T | c.1080G>A    | c.(1078-1080)ctG>ctA   |
| C | c.763A>G     | c.(763-765)Aag>Gag     |
| T | c.767C>T     | c.(766-768)cCc>cTc     |
| A | c.879C>T     | c.(877-879)atC>atT     |
| A | c.6096G>A    | c.(6094-6096)ctG>ctA   |
| A |              |                        |
| A | c.939G>A     | c.(937-939)ttG>ttA     |
| T | c.4933G>A    | c.(4933-4935)Gaa>Aaa   |
| A | c.2412G>A    | c.(2410-2412)acG>acA   |
| T | c.14884G>A   | c.(14884-14886)Gga>Aga |
| T | c.1140G>A    | c.(1138-1140)gaG>gaA   |
| A | c.880G>A     | c.(880-882)Gat>Aat     |
| T | c.4210C>T    | c.(4210-4212)Cag>Tag   |
| A | c.1554C>T    | c.(1552-1554)gaC>gaT   |
| G | c.1629A>C    | c.(1627-1629)ggA>ggC   |
| C | c.196T>G     | c.(196-198)Tgc>Ggc     |
| T | c.562G>A     | c.(562-564)Gaa>Aaa     |
| T | c.139G>A     | c.(139-141)Ggc>Agc     |
| A | c.767C>T     | c.(766-768)gCc>gTc     |
| T | c.1672G>A    | c.(1672-1674)Gag>Aag   |
| A |              |                        |



|   |           |                      |
|---|-----------|----------------------|
| G |           |                      |
| A | c.2212C>T | c.(2212-2214)Cgg>Tgg |
| T | c.678G>A  | c.(676-678)gaG>gaA   |
| A | c.229G>A  | c.(229-231)Gaa>Aaa   |
| T | c.240C>T  | c.(238-240)atC>atT   |
| A | c.8C>T    | c.(7-9)gCc>gTc       |
| T | c.1382C>T | c.(1381-1383)tCc>tTc |
| A | c.3015C>T | c.(3013-3015)ggC>ggT |
| T | c.1732C>T | c.(1732-1734)Cgg>Tgg |
| T |           |                      |
| T | c.714T>A  | c.(712-714)ccT>ccA   |
| A | c.829G>A  | c.(829-831)Gca>Aca   |
| G | c.129A>G  | c.(127-129)gaA>gaG   |
| T |           |                      |
| A | c.360G>A  | c.(358-360)tgG>tgA   |
| A | c.1768C>T | c.(1768-1770)Cgc>Tgc |
| A | c.1432C>T | c.(1432-1434)Ctc>Ttc |
| A | c.1864C>T | c.(1864-1866)Cct>Tct |
| T | c.312A>T  | c.(310-312)gaA>gaT   |
| G | c.1263A>G | c.(1261-1263)gaA>gaG |
| A | c.4456G>A | c.(4456-4458)Gag>Aag |
| A | c.250C>T  | c.(250-252)Cct>Tct   |
| T | c.872G>A  | c.(871-873)cGa>cAa   |
| A |           |                      |
| T | c.904G>A  | c.(904-906)Gag>Aag   |
| A | c.470A>T  | c.(469-471)aAa>aTa   |
| T | c.2185G>A | c.(2185-2187)Gaa>Aaa |
| T |           |                      |
| A | c.743C>A  | c.(742-744)tCc>tAc   |
| T | c.64G>A   | c.(64-66)Gaa>Aaa     |
| A | c.734C>A  | c.(733-735)cCt>cAt   |
| T | c.1317C>T | c.(1315-1317)cgC>cgT |
| C | c.563T>G  | c.(562-564)tTc>tGc   |
| A |           |                      |
| A | c.553C>T  | c.(553-555)Ctg>Ttg   |
| G |           |                      |
| A |           |                      |
| T | c.790G>A  | c.(790-792)Gac>Aac   |
| T |           |                      |
| T | c.1643C>T | c.(1642-1644)aCt>aTt |
| A | c.4020G>A | c.(4018-4020)agG>agA |
| T |           |                      |
| A | c.9C>T    | c.(7-9)acC>acT       |

|   |            |                        |
|---|------------|------------------------|
| T | c.273C>T   | c.(271-273)ttC>ttT     |
| A | c.900G>A   | c.(898-900)ggG>ggA     |
| T | c.1940C>T  | c.(1939-1941)tCc>tTc   |
| T | c.1124C>T  | c.(1123-1125)tCc>tTc   |
| T |            |                        |
| T | c.847G>A   | c.(847-849)Gat>Aat     |
| A | c.1235G>A  | c.(1234-1236)cGa>cAa   |
| A | c.1921G>A  | c.(1921-1923)Gat>Aat   |
| T | c.577C>T   | c.(577-579)Ccc>Tcc     |
| G | c.797A>G   | c.(796-798)aAc>aGc     |
| A | c.753G>A   | c.(751-753)ggG>ggA     |
| A | c.487G>A   | c.(487-489)Gaa>Aaa     |
| G |            |                        |
| A | c.3940G>A  | c.(3940-3942)Gaa>Aaa   |
| T | c.84C>T    | c.(82-84)ttC>ttT       |
| A | c.393G>A   | c.(391-393)gtG>gtA     |
| A | c.1080G>A  | c.(1078-1080)atG>atA   |
| T | c.138G>A   | c.(136-138)aaG>aaA     |
| T | c.1262G>T  | c.(1261-1263)cGa>cTa   |
| T | c.1772C>T  | c.(1771-1773)gCc>gTc   |
| A | c.1432C>T  | c.(1432-1434)Cag>Tag   |
| A | c.1706C>T  | c.(1705-1707)tCt>tTt   |
| T |            |                        |
| T | c.285G>A   | c.(283-285)tgG>tgA     |
| A | c.12245G>A | c.(12244-12246)gGa>gAa |
| A | c.151G>A   | c.(151-153)Gaa>Aaa     |
| T |            |                        |
| T |            |                        |
| A | c.910G>A   | c.(910-912)Ggt>Agt     |
| A | c.697C>T   | c.(697-699)Cac>Tac     |
| T | c.4998G>A  | c.(4996-4998)cgG>cgA   |
| T | c.1714C>T  | c.(1714-1716)Ccg>Tcg   |
| C | c.1549A>C  | c.(1549-1551)Aaa>Caa   |
| T | c.1681G>A  | c.(1681-1683)Gga>Aga   |
| A | c.389G>A   | c.(388-390)gGa>gAa     |
| T |            |                        |
| A | c.2235G>A  | c.(2233-2235)tcG>tcA   |
| T | c.558C>T   | c.(556-558)ctC>ctT     |
| T | c.2329G>A  | c.(2329-2331)Gag>Aag   |
| A | c.1763G>A  | c.(1762-1764)cGg>cAg   |
| T | c.687G>A   | c.(685-687)gaG>gaA     |
| A | c.974C>T   | c.(973-975)cCc>cTc     |
| T | c.744C>T   | c.(742-744)gtC>gtT     |

|   |              |                      |
|---|--------------|----------------------|
| A | c.7548C>T    | c.(7546-7548)tcC>tcT |
| A |              |                      |
| A | c.276C>T     | c.(274-276)ctC>ctT   |
| T | c.1128C>T    | c.(1126-1128)atC>atT |
| T | c.294C>T     | c.(292-294)gcC>gcT   |
| A | c.4231C>T    |                      |
| A | c.269G>A     | c.(268-270)gGa>gAa   |
| C |              |                      |
| T | c.188C>T     | c.(187-189)tCa>tTa   |
| T | c.2713A>T    | c.(2713-2715)Aat>Tat |
| A |              |                      |
| A | c.650C>T     | c.(649-651)tCc>tTc   |
| T | c.1086C>A    | c.(1084-1086)ctC>ctA |
| G | c.663C>G     | c.(661-663)ttC>ttG   |
| G | c.2430A>G    | c.(2428-2430)aaA>aaG |
| T | c.340_splice | c.e5-2               |
| T | c.853C>T     | c.(853-855)Cac>Tac   |
| C | c.1996A>C    | c.(1996-1998)Aaa>Caa |
| T | c.3544C>T    | c.(3544-3546)Ccc>Tcc |
| T | c.1014C>T    | c.(1012-1014)atC>atT |
| T | c.93C>T      | c.(91-93)tcC>tcT     |
| A | c.1405C>T    | c.(1405-1407)Cca>Tca |
| A | c.1168G>A    | c.(1168-1170)Gat>Aat |
| T |              |                      |
| T | c.720C>T     | c.(718-720)gcC>gcT   |
| A | c.898C>T     | c.(898-900)Cgt>Tgt   |
| T |              |                      |
| A | c.1962C>T    | c.(1960-1962)gtC>gtT |
| A | c.1056G>T    | c.(1054-1056)atG>atT |
| A | c.591C>T     | c.(589-591)ttC>ttT   |
| T | c.458C>T     | c.(457-459)cCa>cTa   |
| T | c.100G>A     | c.(100-102)Gaa>Aaa   |
| T |              |                      |
| A |              |                      |
| A | c.1438C>T    | c.(1438-1440)Cca>Tca |
| A |              |                      |
| A | c.114G>A     | c.(112-114)atG>atA   |
| T | c.1381G>A    | c.(1381-1383)Gaa>Aaa |
| A | c.2476C>T    | c.(2476-2478)Ctt>Ttt |
| A | c.3465G>T    | c.(3463-3465)gtG>gtT |
| T | c.1212C>T    | c.(1210-1212)tcC>tcT |
| A | c.561C>T     | c.(559-561)atC>atT   |
| T | c.193C>T     | c.(193-195)Ctg>Ttg   |

|   |            |                        |
|---|------------|------------------------|
| A |            |                        |
| T |            |                        |
| T | c.1651G>A  | c.(1651-1653)Gag>Aag   |
| A | c.572C>T   | c.(571-573)tCa>tTa     |
| A |            |                        |
| T |            |                        |
| A | c.5155C>T  | c.(5155-5157)Caa>Taa   |
| T |            |                        |
| T | c.837C>T   | c.(835-837)atC>atT     |
| T | c.163C>T   | c.(163-165)Cct>Tct     |
| A |            |                        |
| A | c.5388G>A  | c.(5386-5388)acG>acA   |
| A |            |                        |
| A | c.6512C>T  | c.(6511-6513)cCc>cTc   |
| T | c.1773C>T  | c.(1771-1773)gcC>gcT   |
| A | c.531G>A   | c.(529-531)acG>acA     |
| T | c.36352G>A | c.(36352-36354)Gtg>Atg |
| T | c.994G>A   | c.(994-996)Gag>Aag     |
| G | c.1052T>C  | c.(1051-1053)gTt>gCt   |
| C | c.1397G>C  | c.(1396-1398)tGt>tCt   |
| T | c.3116C>T  | c.(3115-3117)tCt>tTt   |
| T |            |                        |
| A |            |                        |
| T | c.1955C>T  | c.(1954-1956)tCc>tTc   |
| A | c.657C>A   | c.(655-657)aaC>aaA     |
| A | c.707C>T   | c.(706-708)tCc>tTc     |
| T | c.3270G>A  | c.(3268-3270)caG>caA   |
| T | c.227C>T   | c.(226-228)tCc>tTc     |
| A | c.536C>T   | c.(535-537)tCc>tTc     |
| A | c.319G>A   | c.(319-321)Gag>Aag     |
| A | c.1873C>T  | c.(1873-1875)Cca>Tca   |
| T | c.1352C>T  | c.(1351-1353)tCc>tTc   |
| G | c.371G>C   | c.(370-372)gGt>gCt     |
| T |            |                        |
| A | c.1140C>T  | c.(1138-1140)tcC>tcT   |
| T |            |                        |
| T | c.2787G>A  | c.(2785-2787)agG>agA   |
| A |            |                        |
| A | c.183G>A   | c.(181-183)acG>acA     |
| T | c.2528C>T  | c.(2527-2529)tCa>tTa   |
| T | c.942C>T   | c.(940-942)tcC>tcT     |
| T |            |                        |
| T | c.105C>T   | c.(103-105)tcC>tcT     |

|   |              |                      |
|---|--------------|----------------------|
| C | c.440_splice | c.e4-1               |
| A | c.4631G>A    | c.(4630-4632)aGc>aAc |
| A | c.835G>A     | c.(835-837)Gag>Aag   |
| A | c.1186G>A    | c.(1186-1188)Gga>Aga |
| T | c.106G>A     | c.(106-108)Gat>Aat   |
| A | c.365G>A     | c.(364-366)aGa>aAa   |
| T | c.2214G>A    | c.(2212-2214)ggG>ggA |
| T | c.4613C>T    | c.(4612-4614)cCc>cTc |
| A | c.649C>A     | c.(649-651)Cat>Aat   |
| A |              |                      |
| T | c.244C>T     | c.(244-246)Ctc>Ttc   |
| A | c.433G>A     | c.(433-435)Ggg>Agg   |
| T |              |                      |
| A | c.2667C>T    | c.(2665-2667)ttC>ttT |
| T | c.502C>T     | c.(502-504)Cgc>Tgc   |
| A |              |                      |
| T | c.4878G>A    | c.(4876-4878)ggG>ggA |
| T | c.739T>A     | c.(739-741)Ttt>Att   |
| A | c.183C>T     | c.(181-183)atC>atT   |
| A | c.673G>T     | c.(673-675)Gaa>Taa   |
| T | c.724C>T     | c.(724-726)Cgg>Tgg   |
| A |              |                      |
| T | c.967G>A     | c.(967-969)Gga>Aga   |
| A | c.976C>T     | c.(976-978)Cca>Tca   |
| T |              |                      |
| T | c.788C>T     | c.(787-789)tCc>tTc   |
| A | c.1623C>A    | c.(1621-1623)gcC>gcA |
| A | c.4343C>T    | c.(4342-4344)tCc>tTc |
| T | c.428C>T     | c.(427-429)tCc>tTc   |
| A | c.2749G>A    | c.(2749-2751)Gag>Aag |
| A | c.1879G>A    | c.(1879-1881)Gac>Aac |
| T | c.682G>A     | c.(682-684)Gag>Aag   |
| A | c.2697G>A    | c.(2695-2697)gaG>gaA |
| A |              |                      |
| T | c.155_splice | c.e2+1               |
| A | c.775C>T     |                      |
| T | c.788C>T     | c.(787-789)tCc>tTc   |
| T |              |                      |
| T |              |                      |
| A | c.621G>A     | c.(619-621)gaG>gaA   |
| T | c.5814C>T    | c.(5812-5814)ccC>ccT |
| A | c.4025C>T    | c.(4024-4026)tCg>tTg |
| T | c.458C>T     | c.(457-459)cCa>cTa   |

|   |           |                      |
|---|-----------|----------------------|
| A | c.2216C>T | c.(2215-2217)aCc>aTc |
| A | c.924C>T  | c.(922-924)ttC>ttT   |
| A | c.2641G>T | c.(2641-2643)Ggg>Tgg |
| T | c.750G>A  | c.(748-750)caG>caA   |
| C | c.688T>C  | c.(688-690)Tcc>Ccc   |
| T | c.312C>T  | c.(310-312)atC>atT   |
| A | c.1686C>T | c.(1684-1686)tcC>tcT |
| T | c.2424C>T | c.(2422-2424)tcC>tcT |
| T | c.88C>T   | c.(88-90)Cga>Tga     |
| T | c.106G>A  | c.(106-108)Gat>Aat   |
| A | c.1448C>T |                      |
| T | c.1194C>T | c.(1192-1194)ctC>ctT |
| T | c.904C>T  | c.(904-906)Cct>Tct   |
| T | c.5067C>T | c.(5065-5067)gcC>gcT |
| A | c.581G>A  | c.(580-582)cGa>cAa   |
| A | c.1401C>T | c.(1399-1401)acC>acT |
| A | c.1115C>T | c.(1114-1116)tCc>tTc |
| A | c.249G>A  | c.(247-249)aaG>aaA   |
| T |           |                      |
| T | c.1338G>A | c.(1336-1338)ggG>ggA |
| A | c.8859C>T | c.(8857-8859)ccC>ccT |
| T | c.153G>A  | c.(151-153)caG>caA   |
| T | c.2763C>T | c.(2761-2763)ttC>ttT |
| A | c.2145C>T | c.(2143-2145)tcC>tcT |
| A | c.559G>A  | c.(559-561)Gag>Aag   |
| A | c.83G>A   | c.(82-84)aGa>aAa     |
| A | c.7847G>A | c.(7846-7848)gGa>gAa |
| A | c.1114G>A | c.(1114-1116)Gaa>Aaa |
| T | c.850C>T  | c.(850-852)Ccc>Tcc   |
| A | c.2727C>T | c.(2725-2727)tcC>tcT |
| T | c.711C>T  | c.(709-711)ttC>ttT   |
| T | c.112G>A  | c.(112-114)Gag>Aag   |
| A | c.148C>T  | c.(148-150)Cgt>Tgt   |
| G | c.719T>C  | c.(718-720)gTc>gCc   |
| A | c.479C>T  | c.(478-480)tCa>tTa   |
| A | c.1845C>T | c.(1843-1845)ggC>ggT |
| A | c.8332G>A | c.(8332-8334)Gga>Aga |
| A | c.3940C>T | c.(3940-3942)Ctt>Ttt |
| G |           |                      |
| A | c.940C>T  | c.(940-942)Cgt>Tgt   |
| T | c.108T>A  | c.(106-108)tcT>tcA   |
| A |           |                      |
| G | c.88A>G   | c.(88-90)Aaa>Gaa     |

|   |             |                      |
|---|-------------|----------------------|
| T | c.3262C>T   | c.(3262-3264)Cgg>Tgg |
| T | c.327C>T    | c.(325-327)atC>atT   |
| T | c.1280C>T   | c.(1279-1281)tCg>tTg |
| A | c.541C>T    | c.(541-543)Cct>Tct   |
| A | c.2259C>T   | c.(2257-2259)gcC>gcT |
| A | c.2449G>A   | c.(2449-2451)Gat>Aat |
| A | c.543C>T    | c.(541-543)ctC>ctT   |
| A | c.271G>A    | c.(271-273)Gag>Aag   |
| T | c.1295C>T   | c.(1294-1296)cCt>cTt |
| A |             |                      |
| T | c.6382G>A   | c.(6382-6384)Gaa>Aaa |
| T | c.5327G>A   | c.(5326-5328)aGc>aAc |
| T |             |                      |
| T | c.636C>T    | c.(634-636)atC>atT   |
| T | c.344C>T    | c.(343-345)cCg>cTg   |
| G |             |                      |
| A | c.1208C>T   | c.(1207-1209)cCc>cTc |
| A | c.333G>A    | c.(331-333)cgG>cgA   |
| A | c.620C>T    | c.(619-621)tCc>tTc   |
| A |             |                      |
| T | c.755G>A    | c.(754-756)gGg>gAg   |
| T | c.2199G>A   | c.(2197-2199)ttG>ttA |
| A | c.50_splice | c.e1+1               |
| A | c.440C>T    | c.(439-441)tCa>tTa   |
| A | c.700C>T    | c.(700-702)Cga>Tga   |
| T | c.454G>A    | c.(454-456)Gaa>Aaa   |
| A | c.997G>T    | c.(997-999)Gga>Tga   |
| T | c.3224G>A   | c.(3223-3225)cGa>cAa |
| G | c.2434A>G   | c.(2434-2436)Aaa>Gaa |
| A |             |                      |
| T | c.2468C>T   | c.(2467-2469)cCt>cTt |
| A | c.208G>A    | c.(208-210)Ggg>Agg   |
| A | c.2836G>A   | c.(2836-2838)Gaa>Aaa |
| T |             |                      |
| A | c.156C>T    | c.(154-156)atC>atT   |
| T | c.906C>T    | c.(904-906)acC>acT   |
| A | c.344G>A    | c.(343-345)gGg>gAg   |
| A | c.682G>T    | c.(682-684)Gga>Tga   |
| A | c.1082G>A   | c.(1081-1083)aGa>aAa |
| T |             |                      |
| T | c.353G>A    | c.(352-354)cGc>cAc   |
| T |             |                      |
| A | c.279C>T    | c.(277-279)cgC>cgT   |

|   |               |                        |
|---|---------------|------------------------|
| A | c.3429G>A     | c.(3427-3429)agG>agA   |
| A | c.803G>A      |                        |
| A | c.828C>T      | c.(826-828)ttC>ttT     |
| A | c.1559C>T     | c.(1558-1560)tCa>tTa   |
| A | c.124G>A      | c.(124-126)Gaa>Aaa     |
| T | c.1030G>A     | c.(1030-1032)Gat>Aat   |
| T | c.755C>T      | c.(754-756)tCg>tTg     |
| A | c.618G>A      | c.(616-618)gcG>gcA     |
| T | c.1998G>A     | c.(1996-1998)cgG>cgA   |
| T | c.4642C>T     | c.(4642-4644)Ccg>Tcg   |
| T | c.206G>T      | c.(205-207)aGg>aTg     |
| A | c.762G>A      | c.(760-762)ggG>ggA     |
| T | c.1004C>T     | c.(1003-1005)tCc>tTc   |
| A | c.345G>A      |                        |
| T | c.3623C>T     | c.(3622-3624)tCc>tTc   |
| A | c.67G>A       | c.(67-69)Gaa>Aaa       |
| A | c.887G>A      | c.(886-888)gGa>gAa     |
| T | c.648C>T      | c.(646-648)atC>atT     |
| T | c.595C>T      | c.(595-597)Cct>Tct     |
| A | c.1242G>A     | c.(1240-1242)acG>acA   |
| A | c.1423G>A     | c.(1423-1425)Gat>Aat   |
| A | c.147C>T      | c.(145-147)atC>atT     |
| T | c.1235C>T     | c.(1234-1236)tCc>tTc   |
| A |               |                        |
| T | c.891C>T      | c.(889-891)ttC>ttT     |
| A | c.111C>T      | c.(109-111)atC>atT     |
| A | c.1333_splice | c.e10+1                |
| A | c.8239G>A     | c.(8239-8241)Gaa>Aaa   |
| A |               |                        |
| C |               |                        |
| A | c.1853G>A     | c.(1852-1854)gGc>gAc   |
| T | c.1073_splice | c.e15-1                |
| A | c.1732C>A     | c.(1732-1734)Cat>Aat   |
| T | c.610G>T      | c.(610-612)Gac>Tac     |
| A | c.967G>A      | c.(967-969)Gaa>Aaa     |
| T |               |                        |
| C | c.303C>G      | c.(301-303)gcC>gcG     |
| T | c.902C>T      | c.(901-903)cCc>cTc     |
| T | c.2509C>T     | c.(2509-2511)Caa>Taa   |
| T | c.1191G>A     | c.(1189-1191)agG>agA   |
| A | c.3072G>A     | c.(3070-3072)aaG>aaA   |
| C | c.14369C>G    | c.(14368-14370)aCa>aGa |
| T | c.1822T>A     | c.(1822-1824)Tta>Ata   |



|   |               |                      |
|---|---------------|----------------------|
| T |               |                      |
| T | c.166C>T      | c.(166-168)Ccg>Tcg   |
| A | c.824C>T      | c.(823-825)cCc>cTc   |
| T | c.730C>T      | c.(730-732)Ctg>Ttg   |
| A |               |                      |
| T | c.324C>T      | c.(322-324)tcC>tcT   |
| T | c.1479C>T     | c.(1477-1479)ccC>ccT |
| T | c.6705G>A     | c.(6703-6705)cgG>cgA |
| T | c.1364C>T     | c.(1363-1365)cCg>cTg |
| C | c.1767G>C     | c.(1765-1767)ggG>ggC |
| A | c.324C>T      | c.(322-324)gtC>gtT   |
| C | c.1470G>C     | c.(1468-1470)cgG>cgC |
| T | c.1451C>T     | c.(1450-1452)tCg>tTg |
| A | c.361G>A      | c.(361-363)Gga>Aga   |
| A | c.1177C>T     | c.(1177-1179)Cat>Tat |
| G | c.2505C>G     | c.(2503-2505)ttC>ttG |
| T | c.1069C>T     | c.(1069-1071)Cca>Tca |
| A | c.1190G>A     |                      |
| A | c.1061C>T     | c.(1060-1062)cCt>cTt |
| T | c.175C>T      | c.(175-177)Cgt>Tgt   |
| A | c.282C>T      | c.(280-282)atC>atT   |
| A | c.859G>A      | c.(859-861)Gtg>Atg   |
| A | c.211G>A      | c.(211-213)Gaa>Aaa   |
| T | c.1089C>T     | c.(1087-1089)gtC>gtT |
| A | c.3672C>T     | c.(3670-3672)ttC>ttT |
| T | c.280C>T      | c.(280-282)Cgt>Tgt   |
| T | c.699G>A      | c.(697-699)atG>atA   |
| A | c.7992C>T     | c.(7990-7992)ttC>ttT |
| T | c.402G>A      | c.(400-402)cgG>cgA   |
| T | c.2606G>A     | c.(2605-2607)aGa>aAa |
| T | c.1006_splice | c.e9+1               |
| T |               |                      |
| A | c.669C>T      | c.(667-669)tgC>tgT   |
| T | c.417C>T      | c.(415-417)tcC>tcT   |
| T | c.432C>T      | c.(430-432)ccC>ccT   |
| T | c.1823C>T     | c.(1822-1824)cCa>cTa |
| A | c.2465C>T     | c.(2464-2466)aCc>aTc |
| A |               |                      |
| A | c.1758G>A     | c.(1756-1758)tgG>tgA |
| A |               |                      |
| T | c.899G>T      | c.(898-900)gGc>gTc   |
| T | c.637C>T      | c.(637-639)Cag>Tag   |
| T | c.1192G>A     | c.(1192-1194)Gag>Aag |

|   |               |                        |
|---|---------------|------------------------|
| T | c.227C>T      | c.(226-228)cCc>cTc     |
| T | c.1658C>A     | c.(1657-1659)tCc>tAc   |
| A | c.1288C>T     | c.(1288-1290)Cct>Tct   |
| A | c.199G>A      | c.(199-201)Gat>Aat     |
| T | c.9488G>A     | c.(9487-9489)gGa>gAa   |
| T | c.1332C>T     | c.(1330-1332)atC>atT   |
| T | c.1557C>T     | c.(1555-1557)taC>taT   |
| T | c.520C>T      | c.(520-522)Cac>Tac     |
| G | c.190A>C      | c.(190-192)Aag>Cag     |
| T | c.3610G>A     | c.(3610-3612)Gga>Aga   |
| A | c.525C>T      | c.(523-525)ttC>ttT     |
| A | c.154G>T      | c.(154-156)Gat>Tat     |
| A | c.10060C>T    | c.(10060-10062)Cga>Tga |
| T | c.1942C>T     | c.(1942-1944)Ctg>Ttg   |
| T | c.1033_splice | c.e4-1                 |
| A |               |                        |
| A | c.476C>T      | c.(475-477)tCc>tTc     |
| C |               |                        |
| T | c.1487G>A     | c.(1486-1488)gGa>gAa   |
| A | c.1796C>T     | c.(1795-1797)gCc>gTc   |
| G | c.231A>G      | c.(229-231)gcA>gcG     |
| C | c.10622T>G    | c.(10621-10623)cTt>cGt |
| T | c.743C>T      | c.(742-744)aCt>aTt     |
| A | c.773C>T      | c.(772-774)tCc>tTc     |
| T | c.1216C>T     | c.(1216-1218)Ccc>Tcc   |
| T | c.2589C>T     | c.(2587-2589)tcC>tcT   |
| A | c.298G>A      | c.(298-300)Gat>Aat     |
| A | c.1180G>A     | c.(1180-1182)Gga>Aga   |
| T | c.99G>A       | c.(97-99)gtG>gtA       |
| A | c.491G>A      | c.(490-492)gGc>gAc     |
| A | c.755C>T      | c.(754-756)cCc>cTc     |
| A | c.1162G>A     | c.(1162-1164)Gaa>Aaa   |
| A | c.4033C>T     | c.(4033-4035)Cca>Tca   |
| A | c.622G>A      | c.(622-624)Gat>Aat     |
| T | c.4695C>T     | c.(4693-4695)ttC>ttT   |
| C | c.28A>G       | c.(28-30)Aaa>Gaa       |
| T | c.2073C>T     | c.(2071-2073)ttC>ttT   |
| A | c.5397C>T     | c.(5395-5397)gtC>gtT   |
| G | c.5735T>C     | c.(5734-5736)cTt>cCt   |
| A | c.307G>A      | c.(307-309)Ggc>Agc     |
| A | c.1899C>T     | c.(1897-1899)ccC>ccT   |
| A | c.148G>A      | c.(148-150)Gag>Aag     |
| A | c.4G>A        | c.(4-6)Gaa>Aaa         |

|   |            |                        |
|---|------------|------------------------|
| A | c.2194C>T  | c.(2194-2196)Cct>Tct   |
| A | c.1294C>T  | c.(1294-1296)Cca>Tca   |
| T | c.991C>T   | c.(991-993)Cct>Tct     |
| T | c.1287C>T  | c.(1285-1287)acC>acT   |
| A | c.2456G>A  | c.(2455-2457)cGa>cAa   |
| T | c.1282G>A  | c.(1282-1284)Gag>Aag   |
| A | c.347C>T   | c.(346-348)cCc>cTc     |
| C |            |                        |
| T | c.2402G>A  | c.(2401-2403)gGa>gAa   |
| T |            |                        |
| A | c.1086G>A  | c.(1084-1086)caG>caA   |
| A | c.483C>T   | c.(481-483)ggC>ggT     |
| G |            |                        |
| A | c.931C>T   | c.(931-933)Ctg>Ttg     |
| T | c.1099C>T  | c.(1099-1101)Ctg>Ttg   |
| G | c.517A>G   | c.(517-519)Agt>Ggt     |
| A | c.21G>A    | c.(19-21)tgG>tgA       |
| T | c.148G>A   | c.(148-150)Gag>Aag     |
| T | c.6982G>A  | c.(6982-6984)Gca>Aca   |
| A |            |                        |
| A |            |                        |
| A | c.454C>A   | c.(454-456)Ctt>Att     |
| A | c.1341C>T  | c.(1339-1341)ctC>ctT   |
| T | c.5004G>A  | c.(5002-5004)ttG>ttA   |
| A | c.504C>A   | c.(502-504)ttC>ttA     |
| T | c.505G>A   | c.(505-507)Gaa>Aaa     |
| A | c.6953C>T  | c.(6952-6954)tCt>tTt   |
| T | c.1828G>A  | c.(1828-1830)Gag>Aag   |
| T | c.1389C>T  | c.(1387-1389)ttC>ttT   |
| A | c.5818G>A  | c.(5818-5820)Gaa>Aaa   |
| A | c.1529G>A  | c.(1528-1530)tGg>tAg   |
| T | c.1044G>A  | c.(1042-1044)atG>atA   |
| T | c.263G>A   | c.(262-264)gGg>gAg     |
| T | c.7764G>A  | c.(7762-7764)ggG>ggA   |
| T | c.2485C>T  | c.(2485-2487)Cca>Tca   |
| C | c.2534T>G  | c.(2533-2535)cTc>cGc   |
| T | c.537C>T   | c.(535-537)tcC>tcT     |
| T | c.12242G>A | c.(12241-12243)cGa>cAa |
| A | c.1851G>A  | c.(1849-1851)agG>agA   |
| A | c.901C>T   | c.(901-903)Ctg>Ttg     |
| A | c.2293G>A  | c.(2293-2295)Gaa>Aaa   |
| A | c.1271C>T  | c.(1270-1272)tCc>tTc   |
| A | c.3886C>T  | c.(3886-3888)Cca>Tca   |

|   |              |                        |
|---|--------------|------------------------|
| A | c.394G>A     | c.(394-396)Gaa>Aaa     |
| A | c.158G>A     | c.(157-159)gGg>gAg     |
| T | c.269C>T     | c.(268-270)tCc>tTc     |
| A |              |                        |
| A | c.1415C>T    | c.(1414-1416)aCt>aTt   |
| A | c.10245G>A   | c.(10243-10245)ctG>ctA |
| T | c.1038C>T    | c.(1036-1038)atC>atT   |
| T | c.1288C>T    | c.(1288-1290)Caa>Taa   |
| T | c.1397C>T    | c.(1396-1398)tCc>tTc   |
| T | c.6206A>T    | c.(6205-6207)gAa>gTa   |
| A | c.1177C>T    | c.(1177-1179)Cgt>Tgt   |
| A |              |                        |
| T | c.883G>A     | c.(883-885)Gtg>Atg     |
| A | c.256G>A     | c.(256-258)Gaa>Aaa     |
| T | c.1627G>A    | c.(1627-1629)Gga>Aga   |
| T | c.3343G>A    | c.(3343-3345)Gaa>Aaa   |
| T | c.237C>T     | c.(235-237)ggC>ggT     |
| T | c.395C>T     | c.(394-396)cCc>cTc     |
| A | c.259C>T     | c.(259-261)Ctg>Ttg     |
| T | c.724_splice | c.e6+1                 |
| T | c.3321C>T    | c.(3319-3321)ccC>ccT   |
| T | c.4601C>T    | c.(4600-4602)tCt>tTt   |
| T | c.482G>A     | c.(481-483)cGa>cAa     |
| T | c.1915G>A    | c.(1915-1917)Gat>Aat   |
| A | c.2367G>A    | c.(2365-2367)aaG>aaA   |
| A | c.195G>A     | c.(193-195)cgG>cgA     |
| A | c.1400C>T    | c.(1399-1401)aCc>aTc   |
| G | c.1272A>C    | c.(1270-1272)aaA>aaC   |
| T | c.145G>A     | c.(145-147)Gaa>Aaa     |
| T | c.102C>T     | c.(100-102)tcC>tcT     |
| T | c.45C>T      | c.(43-45)ctC>ctT       |
| A | c.113T>A     | c.(112-114)cTt>cAt     |
| T | c.6988C>A    | c.(6988-6990)Cac>Aac   |
| T | c.1371C>T    | c.(1369-1371)atC>atT   |
| T | c.1761C>T    | c.(1759-1761)caC>caT   |
| T | c.574G>A     | c.(574-576)Gct>Act     |
| T | c.229C>T     | c.(229-231)Ctc>Ttc     |
| A | c.1449G>A    | c.(1447-1449)aaG>aaA   |
| A | c.196G>A     | c.(196-198)Gga>Aga     |
| A | c.1347C>T    | c.(1345-1347)gtC>gtT   |
| A | c.1089G>A    | c.(1087-1089)acG>acA   |
| T | c.1981G>A    | c.(1981-1983)Gaa>Aaa   |
| A | c.3039C>T    | c.(3037-3039)tcC>tcT   |

|   |              |                        |
|---|--------------|------------------------|
| G |              |                        |
| T |              |                        |
| T | c.1049G>A    | c.(1048-1050)gGa>gAa   |
| T | c.2111G>A    | c.(2110-2112)gGa>gAa   |
| A | c.801C>T     | c.(799-801)tcC>tcT     |
| A | c.1351C>T    | c.(1351-1353)Ccc>Tcc   |
| G | c.617A>G     | c.(616-618)gAg>gGg     |
| A | c.2122C>T    | c.(2122-2124)Ccg>Tcg   |
| A | c.1050C>T    | c.(1048-1050)tcC>tcT   |
| T | c.12544G>A   | c.(12544-12546)Gaa>Aaa |
| T |              |                        |
| A | c.5379G>A    | c.(5377-5379)caG>caA   |
| A |              |                        |
| C |              |                        |
| T | c.241_splice | c.e2+1                 |
| A | c.1788C>T    | c.(1786-1788)ccC>ccT   |
| C |              |                        |
| T |              |                        |
| T | c.1883C>T    | c.(1882-1884)tCg>tTg   |
| T | c.5377G>A    | c.(5377-5379)Gat>Aat   |
| T | c.3065G>A    | c.(3064-3066)gGa>gAa   |
| A | c.1616C>T    | c.(1615-1617)tCc>tTc   |
| T | c.468C>T     | c.(466-468)gcC>gcT     |
| T | c.11794G>A   | c.(11794-11796)Gat>Aat |
| A | c.260C>T     | c.(259-261)tCc>tTc     |
| A | c.627G>A     | c.(625-627)ccG>ccA     |
| A | c.1293C>T    | c.(1291-1293)ctC>ctT   |
| T | c.815C>T     | c.(814-816)gCc>gTc     |
| A |              |                        |
| A | c.4715G>A    | c.(4714-4716)gGa>gAa   |
| T |              |                        |
| T | c.2716C>T    | c.(2716-2718)Ctg>Ttg   |
| T | c.2633G>A    | c.(2632-2634)gGa>gAa   |
| G | c.914T>C     | c.(913-915)gTt>gCt     |
| A | c.4483G>A    |                        |
| T | c.936C>T     | c.(934-936)ccC>ccT     |
| A | c.63C>T      | c.(61-63)atC>atT       |
| A | c.1454C>T    | c.(1453-1455)aCg>aTg   |
| G |              |                        |
| T | c.534C>T     | c.(532-534)ccC>ccT     |
| T | c.762C>T     | c.(760-762)atC>atT     |
| T | c.8395C>T    | c.(8395-8397)Ctc>Ttc   |
| A | c.412G>A     | c.(412-414)Gaa>Aaa     |

|   |               |                      |
|---|---------------|----------------------|
| A | c.3218C>T     | c.(3217-3219)tCc>tTc |
| A | c.314C>T      | c.(313-315)cCc>cTc   |
| A | c.49C>T       | c.(49-51)Cct>Tct     |
| T | c.5004G>A     | c.(5002-5004)cgG>cgA |
| T | c.1835C>T     | c.(1834-1836)gCc>gTc |
| A | c.940G>A      | c.(940-942)Gga>Aga   |
| A | c.1100C>T     | c.(1099-1101)tCg>tTg |
| T |               |                      |
| A | c.333G>A      | c.(331-333)agG>agA   |
| T | c.1274C>T     | c.(1273-1275)tCa>tTa |
| A | c.7609C>T     | c.(7609-7611)Cgt>Tgt |
| T | c.2054C>T     | c.(2053-2055)tCc>tTc |
| A | c.1409C>T     | c.(1408-1410)aCc>aTc |
| A |               |                      |
| A | c.1965_splice | c.e11-1              |
| T | c.2873C>A     | c.(2872-2874)tCg>tAg |
| A |               |                      |
| T | c.274C>T      | c.(274-276)Cct>Tct   |
| G | c.571A>C      | c.(571-573)Aag>Cag   |
| T | c.721G>A      | c.(721-723)Gaa>Aaa   |
| A | c.955G>A      | c.(955-957)Gtg>Atg   |
| A | c.1766C>T     | c.(1765-1767)cCc>cTc |
| A | c.2496C>T     | c.(2494-2496)ggC>ggT |
| G | c.512G>C      | c.(511-513)gGt>gCt   |
| T | c.874G>T      | c.(874-876)Gag>Tag   |
| A | c.80C>T       | c.(79-81)tCt>tTt     |
| T | c.1109C>T     | c.(1108-1110)cCt>cTt |
| A | c.466C>T      | c.(466-468)Caa>Taa   |
| A | c.566C>T      | c.(565-567)tCc>tTc   |
| T |               |                      |
| G |               |                      |
| A | c.2234G>A     | c.(2233-2235)cGa>cAa |
| A | c.627G>A      | c.(625-627)aaG>aaA   |
| T | c.1620G>A     | c.(1618-1620)gaG>gaA |
| A | c.594C>T      | c.(592-594)atC>atT   |
| T |               |                      |
| T | c.1345G>A     | c.(1345-1347)Gga>Aga |
| T | c.709C>T      | c.(709-711)Cgg>Tgg   |
| T | c.4885C>T     | c.(4885-4887)Ctg>Ttg |
| A | c.1366C>T     | c.(1366-1368)Cca>Tca |
| T | c.3837C>T     | c.(3835-3837)gtC>gtT |
| A | c.2151C>T     | c.(2149-2151)atC>atT |
| A |               |                      |

|   |            |                        |
|---|------------|------------------------|
| A | c.19C>T    | c.(19-21)Cct>Tct       |
| T | c.4586C>T  | c.(4585-4587)tCt>tTt   |
| T | c.10146G>A | c.(10144-10146)atG>atA |
| T | c.734C>T   | c.(733-735)cCc>cTc     |
| A |            |                        |
| T | c.398C>T   | c.(397-399)tCa>tTa     |
| A | c.35C>T    | c.(34-36)cCg>cTg       |
| A | c.997G>A   | c.(997-999)Gaa>Aaa     |
| T | c.182C>T   | c.(181-183)tCg>tTg     |
| T | c.57C>T    | c.(55-57)ttC>ttT       |
| T | c.151C>T   | c.(151-153)Ccc>Tcc     |
| T |            |                        |
| T | c.1205C>T  | c.(1204-1206)aCc>aTc   |
| A | c.3278G>A  | c.(3277-3279)tGg>tAg   |
| T | c.592G>A   | c.(592-594)Ggg>Agg     |
| A | c.397G>A   | c.(397-399)Gag>Aag     |
| T | c.1074C>T  | c.(1072-1074)ttC>ttT   |
| T | c.2330C>T  | c.(2329-2331)tCg>tTg   |
| A | c.2302C>T  | c.(2302-2304)Cgt>Tgt   |
| T | c.1024G>A  | c.(1024-1026)Gag>Aag   |
| T | c.467G>A   | c.(466-468)cGa>cAa     |
| A | c.1556C>T  | c.(1555-1557)tCc>tTc   |
| C | c.1135T>C  | c.(1135-1137)Tcg>Ccg   |
| A | c.614G>A   | c.(613-615)gGa>gAa     |
| C | c.559G>C   | c.(559-561)Gat>Cat     |
| T | c.201G>A   | c.(199-201)ggG>ggA     |
| A | c.911G>A   | c.(910-912)gGg>gAg     |
| A | c.47C>T    | c.(46-48)cCc>cTc       |
| T | c.3709G>A  | c.(3709-3711)Gaa>Aaa   |
| A | c.450C>T   | c.(448-450)atC>atT     |
| A | c.4974C>T  | c.(4972-4974)gaC>gaT   |
| T | c.969G>A   | c.(967-969)cgG>cgA     |
| A |            |                        |
| A | c.376G>A   | c.(376-378)Gaa>Aaa     |
| A | c.66G>A    | c.(64-66)aaG>aaA       |
| A | c.226G>A   | c.(226-228)Gaa>Aaa     |
| T |            |                        |
| T | c.447G>A   | c.(445-447)aaG>aaA     |
| T | c.626G>A   | c.(625-627)cGa>cAa     |
| C |            |                        |
| G | c.503T>G   | c.(502-504)aTc>aGc     |
| A | c.801C>T   | c.(799-801)ggC>ggT     |
| T | c.1473C>T  | c.(1471-1473)atC>atT   |

|   |               |                        |
|---|---------------|------------------------|
| T | c.481G>A      | c.(481-483)Gat>Aat     |
| T | c.514G>A      | c.(514-516)Gag>Aag     |
| A | c.493C>T      | c.(493-495)Cgc>Tgc     |
| T | c.4696C>T     | c.(4696-4698)Cgg>Tgg   |
| T | c.224C>T      | c.(223-225)tCa>tTa     |
| A |               |                        |
| A | c.1422G>A     | c.(1420-1422)agG>agA   |
| A | c.486G>A      | c.(484-486)agG>agA     |
| T | c.102G>A      | c.(100-102)gtG>gtA     |
| T | c.656G>A      | c.(655-657)gGa>gAa     |
| A | c.725C>T      | c.(724-726)tCa>tTa     |
| T | c.1101C>T     | c.(1099-1101)ttC>ttT   |
| A | c.1172_splice | c.e9-1                 |
| A | c.8026G>T     | c.(8026-8028)Gat>Tat   |
| T | c.103C>T      | c.(103-105)Cat>Tat     |
| A | c.1715C>T     | c.(1714-1716)cCc>cTc   |
| A | c.614C>T      | c.(613-615)tCc>tTc     |
| T | c.201C>T      | c.(199-201)gcC>gcT     |
| A | c.530C>T      | c.(529-531)cCc>cTc     |
| T | c.841C>T      | c.(841-843)Cct>Tct     |
| A | c.1602_splice | c.e10-1                |
| T | c.1153G>A     | c.(1153-1155)Gga>Aga   |
| A | c.390C>T      | c.(388-390)acC>acT     |
| A | c.2942G>T     | c.(2941-2943)aGa>aTa   |
| A | c.705C>T      | c.(703-705)ccC>ccT     |
| A | c.1500C>T     | c.(1498-1500)tcC>tcT   |
| A | c.1736C>T     | c.(1735-1737)cCt>cTt   |
| G | c.97T>C       | c.(97-99)Ttg>Ctg       |
| A | c.10832C>T    | c.(10831-10833)tCc>tTc |
| A | c.73C>T       | c.(73-75)Cgg>Tgg       |
| A | c.8722C>T     |                        |
| A | c.1909G>A     | c.(1909-1911)Gaa>Aaa   |
| A | c.1264G>A     | c.(1264-1266)Ggc>Agc   |
| T | c.292G>A      | c.(292-294)Gat>Aat     |
| T | c.2948C>T     | c.(2947-2949)cCa>cTa   |
| A | c.842T>A      | c.(841-843)tTt>tAt     |
| A | c.476G>A      | c.(475-477)gGa>gAa     |
| T |               |                        |
| T | c.847C>T      | c.(847-849)Cag>Tag     |
| T | c.4125C>T     | c.(4123-4125)ccC>ccT   |
| T | c.1194C>T     | c.(1192-1194)ttC>ttT   |
| T | c.882G>A      | c.(880-882)ggG>ggA     |
| T | c.888G>A      | c.(886-888)tcG>tcA     |



|   |              |                        |
|---|--------------|------------------------|
| A | c.297C>T     | c.(295-297)ggC>ggT     |
| T | c.1461C>T    | c.(1459-1461)ggC>ggT   |
| T | c.324C>T     | c.(322-324)atC>atT     |
| T | c.1224G>A    | c.(1222-1224)tgG>tgA   |
| T | c.2854G>A    | c.(2854-2856)Gaa>Aaa   |
| A | c.544_splice | c.e4+1                 |
| A | c.185G>A     | c.(184-186)cGa>cAa     |
| T | c.11884C>A   | c.(11884-11886)Cat>Aat |
| A | c.352C>T     | c.(352-354)Cgt>Tgt     |
| T | c.1288C>T    | c.(1288-1290)Cct>Tct   |
| T | c.2047C>A    | c.(2047-2049)Cta>Ata   |
| T |              |                        |
| T | c.2311C>T    | c.(2311-2313)Ctc>Ttc   |
| A | c.262C>T     | c.(262-264)Cgc>Tgc     |
| T | c.1387C>T    | c.(1387-1389)Ccc>Tcc   |
| T |              |                        |
| T | c.1200C>T    | c.(1198-1200)atC>atT   |
| C | c.933G>C     | c.(931-933)gaG>gaC     |
| C | c.1643T>C    | c.(1642-1644)cTg>cCg   |
| A | c.724G>A     | c.(724-726)Gaa>Aaa     |
| A | c.956C>T     | c.(955-957)cCt>cTt     |
| A | c.306C>T     | c.(304-306)tcC>tcT     |
| T | c.803C>T     | c.(802-804)cCt>cTt     |
| T | c.1300C>T    | c.(1300-1302)Cgg>Tgg   |
| T | c.3106G>A    | c.(3106-3108)Ggg>Agg   |
| T | c.105G>A     | c.(103-105)gaG>gaA     |
| A | c.701T>A     |                        |
| A | c.1499C>T    | c.(1498-1500)tCc>tTc   |
| A | c.2052C>T    | c.(2050-2052)ctC>ctT   |
| C | c.1102G>C    | c.(1102-1104)Ggg>Cgg   |
| A | c.1539G>A    | c.(1537-1539)caG>caA   |
| T | c.2716C>T    | c.(2716-2718)Cct>Tct   |
| C |              |                        |
| A | c.1221C>A    | c.(1219-1221)ttC>ttA   |
| A | c.715C>T     | c.(715-717)Cct>Tct     |
| T |              |                        |
| T | c.1324G>A    | c.(1324-1326)Gaa>Aaa   |
| A | c.420C>T     | c.(418-420)tcC>tcT     |
| T | c.2595C>T    | c.(2593-2595)atC>atT   |
| A | c.871C>T     | c.(871-873)Ccg>Tcg     |
| T |              |                        |
| A |              |                        |
| A |              |                        |

|   |               |                      |
|---|---------------|----------------------|
| C | c.2032A>G     | c.(2032-2034)Aaa>Gaa |
| T | c.2994C>T     | c.(2992-2994)ttC>ttT |
| T | c.2229G>A     | c.(2227-2229)gtG>gtA |
| A | c.682C>T      | c.(682-684)Ccc>Tcc   |
| T | c.1402C>T     | c.(1402-1404)Ccc>Tcc |
| A | c.1136C>T     | c.(1135-1137)aCt>aTt |
| A |               |                      |
| T | c.1853C>T     | c.(1852-1854)gCg>gTg |
| T | c.157G>T      | c.(157-159)Ggg>Tgg   |
| T | c.511G>A      | c.(511-513)Ggt>Agt   |
| T | c.158C>T      | c.(157-159)tCc>tTc   |
| A |               |                      |
| C | c.3295G>C     | c.(3295-3297)Gaa>Caa |
| A | c.789C>T      | c.(787-789)gtC>gtT   |
| T | c.4269C>T     | c.(4267-4269)ttC>ttT |
| T | c.1435A>T     | c.(1435-1437)Aaa>Taa |
| A | c.1033G>A     |                      |
| T | c.7C>T        | c.(7-9)Cca>Tca       |
| T | c.1030C>T     | c.(1030-1032)Caa>Taa |
| A | c.319G>A      | c.(319-321)Ggc>Agc   |
| A | c.55C>T       | c.(55-57)Cat>Tat     |
| A | c.428C>T      | c.(427-429)gCt>gTt   |
| T | c.349G>A      | c.(349-351)Gag>Aag   |
| A |               |                      |
| A | c.2165C>T     | c.(2164-2166)tCc>tTc |
| T | c.1379C>T     | c.(1378-1380)tCc>tTc |
| A | c.929G>A      | c.(928-930)gGg>gAg   |
| T | c.5419G>A     | c.(5419-5421)Gtt>Att |
| A | c.1180C>T     | c.(1180-1182)Cga>Tga |
| T | c.1428C>T     | c.(1426-1428)ttC>ttT |
| T | c.2362A>T     | c.(2362-2364)Act>Tct |
| T |               |                      |
| A | c.679_splice  | c.e9+1               |
| A | c.3121G>A     | c.(3121-3123)Gaa>Aaa |
| A | c.233G>T      | c.(232-234)gGg>gTg   |
| A | c.1707C>T     | c.(1705-1707)ctC>ctT |
| T | c.578C>T      | c.(577-579)gCc>gTc   |
| T | c.3G>A        | c.(1-3)atG>atA       |
| T | c.1384G>A     | c.(1384-1386)Gaa>Aaa |
| A | c.-107_splice | c.e1-1               |
| T | c.68A>T       | c.(67-69)aAa>aTa     |
| A | c.325_splice  | c.e3-1               |
| A |               |                      |

|   |               |                      |
|---|---------------|----------------------|
| T | c.184C>T      | c.(184-186)Cat>Tat   |
| A | c.497C>T      | c.(496-498)cCt>cTt   |
| T | c.919G>A      | c.(919-921)Gat>Aat   |
| A | c.4700C>T     | c.(4699-4701)tCc>tTc |
| T | c.1384C>T     | c.(1384-1386)Ctc>Ttc |
| A | c.1751C>A     | c.(1750-1752)aCt>aAt |
| A | c.680G>A      | c.(679-681)gGa>gAa   |
| A | c.6199_splice | c.e43-1              |
| A | c.1259G>A     | c.(1258-1260)cGa>cAa |
| T |               |                      |
| T |               |                      |
| A | c.1125_splice | c.e12+1              |
| T | c.569C>T      | c.(568-570)cCt>cTt   |
| A | c.555T>A      | c.(553-555)ttT>ttA   |
| A |               |                      |
| A | c.1072C>T     | c.(1072-1074)Cac>Tac |
| T | c.368C>T      | c.(367-369)tCg>tTg   |
| T | c.4051C>T     | c.(4051-4053)Caa>Taa |
| T | c.511C>T      | c.(511-513)Cct>Tct   |
| A | c.1162G>A     | c.(1162-1164)Gag>Aag |
| T |               |                      |
| A | c.1662G>A     | c.(1660-1662)cgG>cgA |
| T | c.2557C>T     | c.(2557-2559)Cca>Tca |
| T | c.248C>T      | c.(247-249)cCt>cTt   |
| T | c.534C>T      | c.(532-534)atC>atT   |
| A | c.535G>A      | c.(535-537)Gaa>Aaa   |
| T | c.663G>A      |                      |
| T | c.750G>A      | c.(748-750)ggG>ggA   |
| T | c.32C>T       | c.(31-33)cCt>cTt     |
| A | c.2515C>T     | c.(2515-2517)Cgt>Tgt |
| T | c.3856C>T     | c.(3856-3858)Ccg>Tcg |
| A | c.2679C>T     | c.(2677-2679)gcC>gcT |
| A | c.1217G>A     | c.(1216-1218)gGc>gAc |
| T | c.1478C>T     | c.(1477-1479)cCc>cTc |
| A | c.1182C>T     | c.(1180-1182)ctC>ctT |
| T | c.29C>T       | c.(28-30)tCg>tTg     |
| C | c.1138A>C     | c.(1138-1140)Aag>Cag |
| A | c.560G>A      | c.(559-561)gGc>gAc   |
| T | c.448T>A      | c.(448-450)Tgg>Agg   |
| A | c.1431C>T     | c.(1429-1431)tcC>tcT |
| T | c.1204G>A     | c.(1204-1206)Ggc>Agc |
| T | c.2245_splice | c.e30-1              |
| A | c.880G>A      | c.(880-882)Gga>Aga   |

|   |               |                        |
|---|---------------|------------------------|
| A | c.3696C>T     | c.(3694-3696)ccC>ccT   |
| T | c.5577C>T     | c.(5575-5577)ccC>ccT   |
| T | c.1425G>A     | c.(1423-1425)tcG>tcA   |
| A | c.852C>T      | c.(850-852)tcC>tcT     |
| A |               |                        |
| T |               |                        |
| A | c.3454C>T     | c.(3454-3456)Ccc>Tcc   |
| G | c.639C>G      | c.(637-639)atC>atG     |
| G | c.702A>C      | c.(700-702)caA>caC     |
| A | c.1013C>T     | c.(1012-1014)cCa>cTa   |
| A |               |                        |
| T | c.23178G>A    | c.(23176-23178)agG>agA |
| A | c.1606C>T     | c.(1606-1608)Cca>Tca   |
| A | c.2412_splice | c.e10+1                |
| T | c.3344_splice | c.e21-1                |
| T |               |                        |
| T | c.6646C>T     | c.(6646-6648)Ccc>Tcc   |
| A | c.918C>T      | c.(916-918)ctC>ctT     |
| T | c.846C>T      | c.(844-846)aaC>aaT     |
| A | c.1551C>T     | c.(1549-1551)ccC>ccT   |
| A | c.792C>T      | c.(790-792)gcC>gcT     |
| A | c.916C>T      | c.(916-918)Cac>Tac     |
| A | c.928G>A      | c.(928-930)Gag>Aag     |
| A | c.900C>T      | c.(898-900)atC>atT     |
| A | c.55G>A       | c.(55-57)Gac>Aac       |
| T | c.476C>T      | c.(475-477)tCc>tTc     |
| A | c.558G>A      | c.(556-558)ctG>ctA     |
| A | c.2571G>A     | c.(2569-2571)aaG>aaA   |
| A | c.262C>T      | c.(262-264)Cat>Tat     |
| A | c.453G>A      | c.(451-453)gcG>gcA     |
| T | c.857C>T      | c.(856-858)cCc>cTc     |
| T | c.76C>T       | c.(76-78)Cag>Tag       |
| A | c.1390C>T     | c.(1390-1392)Cta>Tta   |
| A | c.184G>A      | c.(184-186)Gag>Aag     |
| A |               |                        |
| T | c.1836C>T     | c.(1834-1836)atC>atT   |
| C | c.449A>G      | c.(448-450)aAc>aGc     |
| A | c.1615T>A     | c.(1615-1617)Tcc>Acc   |
| A |               |                        |
| A |               |                        |
| T | c.2479G>A     | c.(2479-2481)Gag>Aag   |
| A | c.567G>A      | c.(565-567)tgG>tgA     |
| A |               |                        |

|   |            |                        |
|---|------------|------------------------|
| T | c.348G>A   | c.(346-348)aaG>aaA     |
| A | c.756C>T   | c.(754-756)ccC>ccT     |
| A | c.1168C>T  | c.(1168-1170)Cca>Tca   |
| T | c.540C>T   | c.(538-540)ttC>ttT     |
| A | c.583C>T   | c.(583-585)Ctt>Ttt     |
| A | c.7689C>T  | c.(7687-7689)ccC>ccT   |
| T | c.154C>T   | c.(154-156)Cca>Tca     |
| G |            |                        |
| A | c.1024A>T  | c.(1024-1026)Aag>Tag   |
| A | c.426C>T   | c.(424-426)agC>agT     |
| T | c.467G>A   | c.(466-468)gGa>gAa     |
| A | c.97G>A    | c.(97-99)Ggt>Agt       |
| T | c.293G>A   | c.(292-294)aGa>aAa     |
| A | c.461G>A   | c.(460-462)gGc>gAc     |
| A |            |                        |
| T | c.741C>T   | c.(739-741)tcC>tcT     |
| A | c.123C>T   | c.(121-123)gcC>gcT     |
| T | c.300C>T   | c.(298-300)ttC>ttT     |
| A | c.6097G>A  | c.(6097-6099)Gta>Ata   |
| T | c.179G>A   | c.(178-180)aGg>aAg     |
| T | c.3205G>A  | c.(3205-3207)Gag>Aag   |
| C | c.2143G>C  | c.(2143-2145)Gat>Cat   |
| T | c.3508C>T  | c.(3508-3510)Ctt>Ttt   |
| A | c.2959C>A  | c.(2959-2961)Cga>Aga   |
| A | c.3555C>T  | c.(3553-3555)tcC>tcT   |
| A | c.458C>T   | c.(457-459)cCt>cTt     |
| A | c.1186G>A  | c.(1186-1188)Gaa>Aaa   |
| A | c.1874C>T  | c.(1873-1875)tCc>tTc   |
| A | c.280C>T   | c.(280-282)Ccg>Tcg     |
| T | c.3777G>A  | c.(3775-3777)caG>caA   |
| A | c.9814G>A  | c.(9814-9816)Gaa>Aaa   |
| T | c.8119G>A  | c.(8119-8121)Gga>Aga   |
| T |            |                        |
| A | c.4868C>T  | c.(4867-4869)tCt>tTt   |
| T |            |                        |
| T | c.23523G>A | c.(23521-23523)ggG>ggA |
| G |            |                        |
| T | c.344C>T   | c.(343-345)cCg>cTg     |
| A | c.5243C>T  | c.(5242-5244)tCg>tTg   |
| A |            |                        |
| A |            |                        |
| A | c.1583T>A  | c.(1582-1584)cTc>cAc   |
| T | c.138G>A   | c.(136-138)ggG>ggA     |

|   |               |                      |
|---|---------------|----------------------|
| T | c.682C>T      | c.(682-684)Ccc>Tcc   |
| T | c.1429C>T     | c.(1429-1431)Ctg>Ttg |
| T | c.1892_splice | c.e12-1              |
| A | c.1345G>A     | c.(1345-1347)Gac>Aac |
| T | c.502C>T      | c.(502-504)Ccg>Tcg   |
| A | c.5647C>T     | c.(5647-5649)Ctt>Ttt |
| A | c.1311C>T     | c.(1309-1311)gcC>gcT |
| T | c.453G>A      | c.(451-453)caG>caA   |
| T | c.2585G>A     | c.(2584-2586)tGa>tAa |
| T | c.3547G>A     | c.(3547-3549)Gac>Aac |
| A | c.1936C>T     | c.(1936-1938)Ccc>Tcc |
| T | c.269G>A      | c.(268-270)aGa>aAa   |
| G | c.1697G>C     | c.(1696-1698)gGg>gCg |
| A |               |                      |
| T | c.102C>T      | c.(100-102)tcC>tcT   |
| T |               |                      |
| A |               |                      |
| A | c.1600C>T     | c.(1600-1602)Cct>Tct |
| T | c.1146C>T     | c.(1144-1146)atC>atT |
| T | c.1459G>A     | c.(1459-1461)Gcc>Acc |
| A | c.1426G>A     | c.(1426-1428)Gga>Aga |
| A | c.1169C>T     | c.(1168-1170)tCg>tTg |
| C | c.479T>C      | c.(478-480)gTg>gCg   |
| T |               |                      |
| A | c.4385G>A     | c.(4384-4386)aGc>aAc |
| A | c.309C>T      | c.(307-309)gtC>gtT   |
| A | c.1705G>A     | c.(1705-1707)Ggc>Agc |
| A | c.247C>T      | c.(247-249)Caa>Taa   |
| T | c.5360G>A     | c.(5359-5361)aGa>aAa |
| A | c.671C>T      | c.(670-672)tCt>tTt   |
| A |               |                      |
| T | c.1025G>A     | c.(1024-1026)aGg>aAg |
| A | c.783G>A      | c.(781-783)tgG>tgA   |
| A | c.298C>T      | c.(298-300)Cgc>Tgc   |
| A | c.2839G>A     | c.(2839-2841)Ggc>Agc |
| A | c.410_splice  | c.e5-1               |
| T | c.206C>A      | c.(205-207)tCc>tAc   |
| T | c.112C>T      | c.(112-114)Ctt>Ttt   |
| T | c.1525C>T     | c.(1525-1527)Ccc>Tcc |
| T | c.1238G>A     |                      |
| A | c.1192G>A     | c.(1192-1194)Gga>Aga |
| A | c.2519C>T     | c.(2518-2520)cCg>cTg |
| A | c.336C>T      | c.(334-336)tcC>tcT   |

|   |              |                      |
|---|--------------|----------------------|
| T | c.681G>A     | c.(679-681)agG>agA   |
| T | c.151G>A     | c.(151-153)Ggg>Agg   |
| T | c.1196G>A    | c.(1195-1197)cGa>cAa |
| T | c.84G>A      | c.(82-84)ggG>ggA     |
| A | c.3358C>T    | c.(3358-3360)Cgg>Tgg |
| A | c.1534C>T    | c.(1534-1536)Cac>Tac |
| T | c.4646C>T    | c.(4645-4647)tCt>tTt |
| A | c.598A>T     | c.(598-600)Aaa>Taa   |
| A | c.2218G>A    | c.(2218-2220)Gaa>Aaa |
| T | c.342C>T     | c.(340-342)aaC>aaT   |
| T | c.296C>T     | c.(295-297)gCc>gTc   |
| A | c.1062C>T    | c.(1060-1062)ttC>ttT |
| A | c.3106C>T    | c.(3106-3108)Cga>Tga |
| A | c.738C>T     | c.(736-738)ttC>ttT   |
| A | c.840G>A     | c.(838-840)ccG>ccA   |
| A | c.249G>A     | c.(247-249)tgG>tgA   |
| T | c.751_splice | c.e8-1               |
| A | c.1951G>A    | c.(1951-1953)Gag>Aag |
| T | c.33204G>A   |                      |
| A | c.1152G>A    | c.(1150-1152)caG>caA |
| A | c.667G>A     | c.(667-669)Gag>Aag   |
| T |              |                      |
| T | c.3248C>T    | c.(3247-3249)aCt>aTt |
| A | c.247C>T     | c.(247-249)Cga>Tga   |
| A |              |                      |
| A | c.596G>A     | c.(595-597)gGa>gAa   |
| T | c.301C>T     | c.(301-303)Cag>Tag   |
| T | c.6934G>A    | c.(6934-6936)Gat>Aat |
| G |              |                      |
| A | c.156C>T     | c.(154-156)gcC>gcT   |
| T | c.1411G>A    | c.(1411-1413)Gtg>Atg |
| T |              |                      |
| T | c.1457C>T    | c.(1456-1458)cCa>cTa |
| T | c.2345G>A    | c.(2344-2346)aGg>aAg |
| A | c.277C>T     | c.(277-279)Ctc>Ttc   |
| T | c.460C>T     | c.(460-462)Cct>Tct   |
| A | c.400A>T     | c.(400-402)Agt>Tgt   |
| A |              |                      |
| T | c.713G>A     | c.(712-714)gGt>gAt   |
| T |              |                      |
| T | c.439G>A     | c.(439-441)Ggc>Agc   |
| T | c.1747G>A    | c.(1747-1749)Gaa>Aaa |
| G |              |                      |

|   |           |                      |
|---|-----------|----------------------|
| T | c.89C>T   | c.(88-90)tCt>tTt     |
| A | c.358G>A  | c.(358-360)Gaa>Aaa   |
| C | c.242A>C  | c.(241-243)aAc>aCc   |
| A | c.1627C>T | c.(1627-1629)Cca>Tca |
| A |           |                      |
| T |           |                      |
| G | c.3871T>C | c.(3871-3873)Tac>Cac |
| T | c.476G>A  | c.(475-477)cGg>cAg   |
| A | c.864C>T  | c.(862-864)atC>atT   |
| A | c.1716C>T | c.(1714-1716)ccC>ccT |
| T |           |                      |
| G | c.919A>G  | c.(919-921)Aac>Gac   |
| A | c.444C>T  | c.(442-444)taC>taT   |
| T | c.1294G>A | c.(1294-1296)Gaa>Aaa |
| A | c.232C>T  | c.(232-234)Ctc>Ttc   |
| A | c.313G>A  | c.(313-315)Gaa>Aaa   |
| T |           |                      |
| A | c.265C>T  | c.(265-267)Cgg>Tgg   |
| A | c.23C>T   | c.(22-24)tCt>tTt     |
| A | c.1861C>T | c.(1861-1863)Cct>Tct |
| A | c.502C>T  |                      |
| A | c.660G>A  | c.(658-660)gtG>gtA   |
| A |           |                      |
| A | c.1492G>A | c.(1492-1494)Ggg>Agg |
| A | c.692C>T  | c.(691-693)tCc>tTc   |
| T | c.900C>T  | c.(898-900)atC>atT   |
| T | c.495C>T  | c.(493-495)tgC>tgT   |
| T | c.836G>T  | c.(835-837)gGa>gTa   |
| T |           |                      |
| T | c.423C>T  | c.(421-423)ttC>ttT   |
| A |           |                      |
| T | c.224C>T  | c.(223-225)gCc>gTc   |
| A | c.7313G>A | c.(7312-7314)gGa>gAa |
| T | c.188C>T  | c.(187-189)cCc>cTc   |
| T | c.344C>T  | c.(343-345)tCc>tTc   |
| G |           |                      |
| T | c.2796C>T | c.(2794-2796)atC>atT |
| A | c.3805C>T | c.(3805-3807)Cgt>Tgt |
| A | c.1348C>T | c.(1348-1350)Cgc>Tgc |
| T | c.2215G>A | c.(2215-2217)Gag>Aag |
| T | c.1437G>A | c.(1435-1437)agG>agA |
| T | c.744C>T  | c.(742-744)tcC>tcT   |
| T | c.152C>T  | c.(151-153)cCc>cTc   |



|   |               |                      |
|---|---------------|----------------------|
| T |               |                      |
| A | c.505C>T      | c.(505-507)Ctg>Ttg   |
| A | c.6949C>T     | c.(6949-6951)Cga>Tga |
| T | c.558C>T      | c.(556-558)atC>atT   |
| G | c.1293C>G     | c.(1291-1293)gaC>gaG |
| A | c.793G>A      | c.(793-795)Gac>Aac   |
| T | c.1925C>T     | c.(1924-1926)gCg>gTg |
| A |               |                      |
| A | c.2811C>T     | c.(2809-2811)atC>atT |
| T | c.346G>A      | c.(346-348)Ggg>Agg   |
| T | c.1049_splice | c.e7+1               |
| T | c.33C>T       | c.(31-33)gcC>gcT     |
| A | c.371C>T      | c.(370-372)gCt>gTt   |
| T | c.907G>A      | c.(907-909)Gag>Aag   |
| A | c.3928G>A     | c.(3928-3930)Gag>Aag |
| A | c.1063C>T     | c.(1063-1065)Cgt>Tgt |
| T | c.931C>T      | c.(931-933)Cag>Tag   |
| T | c.2190C>T     | c.(2188-2190)ccC>ccT |
| T | c.1121G>A     | c.(1120-1122)cGa>cAa |
| A | c.3902C>T     | c.(3901-3903)tCt>tTt |
| A | c.54G>A       | c.(52-54)agG>agA     |
| A | c.1605G>A     | c.(1603-1605)aaG>aaA |
| T | c.1258C>T     | c.(1258-1260)Cca>Tca |
| T | c.1140G>A     | c.(1138-1140)ctG>ctA |
| A | c.395G>A      | c.(394-396)gGg>gAg   |
| A | c.8299_splice | c.e56-1              |
| A | c.176C>A      | c.(175-177)gCc>gAc   |
| C | c.4119T>C     | c.(4117-4119)ttT>ttC |
| T | c.1008C>T     | c.(1006-1008)tcC>tcT |
| A | c.1122C>T     | c.(1120-1122)atC>atT |
| A | c.953C>T      | c.(952-954)gCc>gTc   |
| A | c.2522C>T     | c.(2521-2523)cCc>cTc |
| T | c.9678G>A     | c.(9676-9678)gcG>gcA |
| A | c.645C>T      | c.(643-645)ctC>ctT   |
| A | c.2406C>T     | c.(2404-2406)atC>atT |
| A | c.1238C>T     | c.(1237-1239)gCc>gTc |
| G | c.161T>G      |                      |
| G | c.1016T>C     | c.(1015-1017)aTa>aCa |
| A | c.201G>A      | c.(199-201)cgG>cgA   |
| A | c.93G>A       | c.(91-93)agG>agA     |
| A |               |                      |
| T | c.189C>T      | c.(187-189)ccC>ccT   |
| C | c.127T>G      | c.(127-129)Tct>Gct   |

|   |               |                      |
|---|---------------|----------------------|
| A |               |                      |
| A | c.34G>A       | c.(34-36)Gcc>Acc     |
| A | c.1501G>A     | c.(1501-1503)Gaa>Aaa |
| C | c.4382A>C     | c.(4381-4383)gAt>gCt |
| T | c.313C>T      | c.(313-315)Cgt>Tgt   |
| A | c.1318C>T     | c.(1318-1320)Ccc>Tcc |
| T | c.545C>T      | c.(544-546)cCc>cTc   |
| T | c.2242_splice | c.e16-1              |
| A | c.3369G>A     | c.(3367-3369)gtG>gtA |
| A | c.715C>T      | c.(715-717)Cct>Tct   |
| T | c.232C>T      | c.(232-234)Cag>Tag   |
| T | c.648C>T      | c.(646-648)acC>acT   |
| A | c.6907G>A     | c.(6907-6909)Gat>Aat |
| T | c.579G>A      | c.(577-579)ggG>ggA   |
| A | c.1211G>A     | c.(1210-1212)gGg>gAg |
| T | c.144C>T      | c.(142-144)ggC>ggT   |
| A | c.952G>A      | c.(952-954)Gat>Aat   |
| T | c.445C>T      | c.(445-447)Ctg>Ttg   |
| A | c.1481T>A     | c.(1480-1482)cTg>cAg |
| T | c.665C>T      | c.(664-666)cCa>cTa   |
| C | c.178A>C      | c.(178-180)Aac>Cac   |
| T | c.442C>T      | c.(442-444)Cct>Tct   |
| A | c.213C>T      | c.(211-213)ttC>ttT   |
| T | c.567G>A      | c.(565-567)ctG>ctA   |
| A | c.2493C>T     | c.(2491-2493)gcC>gcT |
| T | c.823C>T      | c.(823-825)Ctc>Ttc   |
| A | c.2767G>A     | c.(2767-2769)Gag>Aag |
| A | c.1950G>A     | c.(1948-1950)acG>acA |
| A | c.3219C>T     | c.(3217-3219)tcC>tcT |
| A | c.2136C>T     | c.(2134-2136)ccC>ccT |
| T | c.279G>A      | c.(277-279)atG>atA   |
| T | c.3646C>T     | c.(3646-3648)Cgt>Tgt |
| T | c.1226C>T     | c.(1225-1227)tCt>tTt |
| T | c.847C>T      | c.(847-849)Cgc>Tgc   |
| A |               |                      |
| G | c.201T>G      | c.(199-201)aaT>aaG   |
| T | c.4138C>T     | c.(4138-4140)Cat>Tat |
| A | c.1417C>T     | c.(1417-1419)Ccc>Tcc |
| T | c.803G>A      | c.(802-804)cGa>cAa   |
| T | c.790C>T      | c.(790-792)Cct>Tct   |
| T | c.1601G>A     | c.(1600-1602)gGt>gAt |
| T | c.477G>A      | c.(475-477)cgG>cgA   |
| T | c.2408C>T     | c.(2407-2409)tCc>tTc |

|   |               |                      |
|---|---------------|----------------------|
| T |               |                      |
| A | c.3428G>A     | c.(3427-3429)aGg>aAg |
| A | c.5156C>T     | c.(5155-5157)tCc>tTc |
| C | c.488T>G      | c.(487-489)tTt>tGt   |
| A | c.790G>A      | c.(790-792)Gaa>Aaa   |
| T | c.319G>A      | c.(319-321)Gaa>Aaa   |
| T | c.54C>T       | c.(52-54)atC>atT     |
| T | c.2541C>T     | c.(2539-2541)ctC>ctT |
| A | c.1592C>T     | c.(1591-1593)tCc>tTc |
| A | c.1022G>A     | c.(1021-1023)cGa>cAa |
| T | c.326G>A      | c.(325-327)gGc>gAc   |
| T | c.164G>A      | c.(163-165)cGc>cAc   |
| A | c.7338C>T     | c.(7336-7338)atC>atT |
| T | c.1388G>A     | c.(1387-1389)gGa>gAa |
| T | c.427G>A      | c.(427-429)Gga>Aga   |
| A | c.779G>A      | c.(778-780)aGt>aAt   |
| A | c.863G>A      | c.(862-864)aGg>aAg   |
| T | c.2835G>A     | c.(2833-2835)aaG>aaA |
| C | c.1176T>G     | c.(1174-1176)tcT>tcG |
| T |               |                      |
| T | c.2449C>T     | c.(2449-2451)Cat>Tat |
| T |               |                      |
| G | c.1368A>G     | c.(1366-1368)gtA>gtG |
| A | c.972C>T      | c.(970-972)gcC>gcT   |
| A | c.420G>A      | c.(418-420)aaG>aaA   |
| A | c.16C>T       | c.(16-18)Ccc>Tcc     |
| T |               |                      |
| T | c.800C>T      | c.(799-801)cCc>cTc   |
| A | c.2082C>T     | c.(2080-2082)tcC>tcT |
| A | c.2569G>A     | c.(2569-2571)Gga>Aga |
| T | c.1085_splice | c.e8-1               |
| T | c.406G>T      | c.(406-408)Gaa>Taa   |
| T | c.1038G>A     | c.(1036-1038)gcG>gcA |
| A | c.642C>T      | c.(640-642)gcC>gcT   |
| T |               |                      |
| T | c.333C>T      | c.(331-333)gcC>gcT   |
| A | c.1605A>T     | c.(1603-1605)aaA>aaT |
| T | c.286C>T      | c.(286-288)Ctg>Ttg   |
| A |               |                      |
| C | c.765T>C      | c.(763-765)tcT>tcC   |
| A | c.781G>A      | c.(781-783)Gct>Act   |
| T | c.2310A>T     | c.(2308-2310)acA>acT |
| T | c.510C>T      | c.(508-510)ttC>ttT   |

|   |            |                        |
|---|------------|------------------------|
| T | c.461G>A   | c.(460-462)cGa>cAa     |
| T |            |                        |
| T | c.5061C>T  | c.(5059-5061)gtC>gtT   |
| A | c.3609G>A  | c.(3607-3609)aaG>aaA   |
| T | c.1350C>T  | c.(1348-1350)ttC>ttT   |
| T | c.471G>A   | c.(469-471)gtG>gtA     |
| G | c.865T>C   |                        |
| A |            |                        |
| A |            |                        |
| A | c.1295G>A  | c.(1294-1296)cGc>cAc   |
| A | c.1437C>T  | c.(1435-1437)atC>atT   |
| T | c.8847G>A  | c.(8845-8847)aaG>aaA   |
| C | c.682A>G   | c.(682-684)Aga>Gga     |
| T | c.287C>T   | c.(286-288)tCc>tTc     |
| T | c.5031C>T  | c.(5029-5031)ttC>ttT   |
| A | c.295G>A   | c.(295-297)Gaa>Aaa     |
| T | c.104C>T   | c.(103-105)cCc>cTc     |
| A | c.756C>T   | c.(754-756)ctC>ctT     |
| C | c.1354T>C  | c.(1354-1356)Tcc>Ccc   |
| T | c.280C>T   | c.(280-282)Cgg>Tgg     |
| T | c.65518G>A | c.(65518-65520)Ggg>Agg |
| T | c.418G>A   | c.(418-420)Gag>Aag     |
| A | c.4244C>T  | c.(4243-4245)cCc>cTc   |
| A | c.8691C>T  | c.(8689-8691)gcC>gcT   |
| A | c.893C>T   | c.(892-894)tCg>tTg     |
| T | c.2705C>T  | c.(2704-2706)tCg>tTg   |
| T | c.286G>T   | c.(286-288)Gag>Tag     |
| T | c.1580C>T  | c.(1579-1581)cCc>cTc   |
| T | c.167C>T   | c.(166-168)tCc>tTc     |
| T | c.10379G>A | c.(10378-10380)aGg>aAg |
| G | c.299T>C   | c.(298-300)gTt>gCt     |
| A | c.2221C>T  | c.(2221-2223)Caa>Taa   |
| G | c.315T>C   | c.(313-315)tcT>tcC     |
| G | c.191T>G   | c.(190-192)cTt>cGt     |
| A | c.3801C>T  | c.(3799-3801)ttC>ttT   |
| A | c.207C>T   | c.(205-207)ggC>ggT     |
| T | c.1332G>A  | c.(1330-1332)ggG>ggA   |
| A | c.769C>T   | c.(769-771)Cag>Tag     |
| T |            |                        |
| A | c.985G>T   | c.(985-987)Gag>Tag     |
| T | c.312C>T   | c.(310-312)ttC>ttT     |
| T | c.1391G>A  | c.(1390-1392)aGa>aAa   |
| T |            |                        |

|   |            |                        |
|---|------------|------------------------|
| T |            |                        |
| T | c.371G>A   |                        |
| T | c.323C>T   | c.(322-324)tCc>tTc     |
| G | c.1145A>G  | c.(1144-1146)aAt>aGt   |
| T | c.22C>T    | c.(22-24)Cct>Tct       |
| T | c.890C>T   | c.(889-891)tCc>tTc     |
| T | c.2003G>A  | c.(2002-2004)cGa>cAa   |
| T | c.6263C>T  | c.(6262-6264)tCt>tTt   |
| T | c.543G>A   | c.(541-543)gaG>gaA     |
| T | c.4366C>T  | c.(4366-4368)Ctg>Ttg   |
| A | c.2568C>T  | c.(2566-2568)ttC>ttT   |
| A | c.220C>T   | c.(220-222)Ccc>Tcc     |
| T | c.412C>T   | c.(412-414)Cct>Tct     |
| T | c.1484C>T  | c.(1483-1485)tCa>tTa   |
| T | c.507C>T   | c.(505-507)tcC>tcT     |
| T | c.1634A>T  | c.(1633-1635)gAa>gTa   |
| T | c.488C>T   | c.(487-489)aCc>aTc     |
| A |            |                        |
| T | c.1453C>T  | c.(1453-1455)Cgg>Tgg   |
| T | c.194G>A   | c.(193-195)cGg>cAg     |
| T |            |                        |
| A | c.623G>A   | c.(622-624)cGa>cAa     |
| T | c.2024C>T  | c.(2023-2025)tCc>tTc   |
| T | c.1983C>T  |                        |
| A | c.935G>A   | c.(934-936)aGt>aAt     |
| C |            |                        |
| A | c.330A>T   | c.(328-330)ctA>ctT     |
| A |            |                        |
| C | c.2796A>G  | c.(2794-2796)gaA>gaG   |
| T | c.430G>A   | c.(430-432)Ggc>Agc     |
| T |            |                        |
| T | c.99C>T    | c.(97-99)ttC>ttT       |
| A | c.1144C>T  | c.(1144-1146)Cgt>Tgt   |
| A | c.116C>T   | c.(115-117)cCt>cTt     |
| A | c.856G>A   | c.(856-858)Gaa>Aaa     |
| A |            |                        |
| C | c.655C>G   | c.(655-657)Ctg>Gtg     |
| A |            |                        |
| T | c.5493G>A  | c.(5491-5493)caG>caA   |
| A | c.15231C>T | c.(15229-15231)gcC>gcT |
| T |            |                        |
| T | c.3905G>A  | c.(3904-3906)cGa>cAa   |
| A | c.1343C>T  | c.(1342-1344)tCc>tTc   |

|   |            |                        |
|---|------------|------------------------|
| A | c.1194G>A  | c.(1192-1194)aaG>aaA   |
| T | c.290C>T   | c.(289-291)tCc>tTc     |
| A | c.20C>T    | c.(19-21)aCc>aTc       |
| A | c.5262C>T  | c.(5260-5262)atC>atT   |
| T | c.536G>A   | c.(535-537)cGa>cAa     |
| A | c.3486G>A  | c.(3484-3486)ctG>ctA   |
| T | c.486C>T   | c.(484-486)atC>atT     |
| A | c.1_splice | c.e1-1                 |
| T |            |                        |
| T | c.1170C>T  | c.(1168-1170)gaC>gaT   |
| T | c.2290G>A  | c.(2290-2292)Gaa>Aaa   |
| A | c.547G>A   | c.(547-549)Gag>Aag     |
| T | c.734G>A   | c.(733-735)gGg>gAg     |
| A | c.1032C>A  | c.(1030-1032)gaC>gaA   |
| T | c.232G>A   | c.(232-234)Ggg>Agg     |
| T | c.527G>A   | c.(526-528)cGa>cAa     |
| T | c.11494G>A | c.(11494-11496)Gaa>Aaa |
| T | c.567G>A   | c.(565-567)acG>acA     |
| T | c.643C>T   | c.(643-645)Cga>Tga     |
| A | c.1197C>T  | c.(1195-1197)tcC>tcT   |
| A | c.391G>A   | c.(391-393)Gaa>Aaa     |
| A | c.2637C>T  | c.(2635-2637)ttC>ttT   |
| A | c.52C>T    | c.(52-54)Cat>Tat       |
| A | c.2799C>T  | c.(2797-2799)ctC>ctT   |
| T | c.98G>A    | c.(97-99)gGg>gAg       |
| A |            |                        |
| T | c.1594G>A  | c.(1594-1596)Gaa>Aaa   |
| A |            |                        |
| A | c.2395G>A  | c.(2395-2397)Gat>Aat   |
| A |            |                        |
| T | c.1216G>A  | c.(1216-1218)Gga>Aga   |
| T | c.484C>T   |                        |
| A | c.629C>T   | c.(628-630)tCg>tTg     |
| A | c.1845G>A  | c.(1843-1845)ggG>ggA   |
| G | c.877T>C   | c.(877-879)Tgt>Cgt     |
| T | c.673G>A   | c.(673-675)Gaa>Aaa     |
| A |            |                        |
| A | c.176C>T   | c.(175-177)aCc>aTc     |
| A | c.2029C>T  | c.(2029-2031)Cga>Tga   |
| T | c.789G>A   | c.(787-789)agG>agA     |
| T |            |                        |
| A | c.99G>A    | c.(97-99)gaG>gaA       |
| T | c.2525C>T  | c.(2524-2526)tCa>tTa   |

|   |               |                      |
|---|---------------|----------------------|
| T | c.856G>A      | c.(856-858)Gca>Aca   |
| T | c.655C>T      | c.(655-657)Ctt>Ttt   |
| T | c.3454C>T     | c.(3454-3456)Cct>Tct |
| A | c.91C>T       | c.(91-93)Cat>Tat     |
| A | c.291G>A      | c.(289-291)gaG>gaA   |
| T | c.918C>T      | c.(916-918)ttC>ttT   |
| G | c.2005_splice | c.e14+1              |
| T | c.63C>T       | c.(61-63)ccC>ccT     |
| T |               |                      |
| T | c.728C>T      | c.(727-729)tCa>tTa   |
| T |               |                      |
| G | c.968T>G      | c.(967-969)aTc>aGc   |
| A | c.5853C>T     | c.(5851-5853)atC>atT |
| T | c.3182C>T     | c.(3181-3183)tCc>tTc |
| T |               |                      |
| A |               |                      |
| A | c.1734_splice | c.e15-1              |
| A | c.1887A>T     | c.(1885-1887)caA>caT |
| A | c.76C>T       | c.(76-78)Cac>Tac     |
| T | c.676G>A      | c.(676-678)Gga>Aga   |
| A | c.628C>T      | c.(628-630)Cag>Tag   |
| A | c.594G>A      | c.(592-594)ccG>ccA   |
| A | c.1145G>A     | c.(1144-1146)cGa>cAa |
| A |               |                      |
| T |               |                      |
| T | c.863C>T      | c.(862-864)aCc>aTc   |
| T |               |                      |
| A | c.1521T>A     | c.(1519-1521)ctT>ctA |
| T | c.675G>A      | c.(673-675)ctG>ctA   |
| A |               |                      |
| T | c.576C>T      | c.(574-576)tcC>tcT   |
| A | c.1512C>T     | c.(1510-1512)atC>atT |
| T |               |                      |
| T | c.761C>T      | c.(760-762)gCt>gTt   |
| C | c.2387G>C     | c.(2386-2388)gGt>gCt |
| T | c.1006_splice | c.e9+1               |
| T | c.4794C>T     | c.(4792-4794)ttC>ttT |
| A |               |                      |
| A |               |                      |
| T | c.1324C>A     | c.(1324-1326)Cct>Act |
| C | c.516G>C      | c.(514-516)ttG>ttC   |
| A | c.173G>A      | c.(172-174)gGg>gAg   |
| A | c.369C>T      | c.(367-369)acC>acT   |

|   |               |                        |
|---|---------------|------------------------|
| A |               |                        |
| T | c.15C>T       | c.(13-15)ttC>ttT       |
| T | c.457G>A      | c.(457-459)Ggg>Agg     |
| T | c.2445C>A     | c.(2443-2445)acC>acA   |
| A | c.1005C>T     | c.(1003-1005)tcC>tcT   |
| A | c.661C>T      | c.(661-663)Ccg>Tcg     |
| A | c.3836C>T     | c.(3835-3837)cCg>cTg   |
| T | c.6528C>T     | c.(6526-6528)tcC>tcT   |
| T | c.533C>T      | c.(532-534)cCc>cTc     |
| A | c.1336G>A     | c.(1336-1338)Gat>Aat   |
| A |               |                        |
| T | c.1038G>A     | c.(1036-1038)ggG>ggA   |
| A | c.105G>A      | c.(103-105)agG>agA     |
| C | c.1271A>G     | c.(1270-1272)cAc>cGc   |
| T | c.155C>T      | c.(154-156)cCa>cTa     |
| T | c.601C>T      | c.(601-603)Cgt>Tgt     |
| T | c.2300_splice | c.e24-2                |
| T | c.2075C>T     | c.(2074-2076)tCa>tTa   |
| G | c.4733T>C     | c.(4732-4734)gTt>gCt   |
| T | c.378G>A      | c.(376-378)acG>acA     |
| T | c.1383C>T     | c.(1381-1383)agC>agT   |
| A | c.432C>T      | c.(430-432)tcC>tcT     |
| T | c.262C>T      | c.(262-264)Ccc>Tcc     |
| A | c.3253G>A     | c.(3253-3255)Gat>Aat   |
| T | c.10419C>T    | c.(10417-10419)tcC>tcT |
| A | c.1282C>T     |                        |
| A | c.1185C>T     | c.(1183-1185)gcC>gcT   |
| A |               |                        |
| A | c.3159C>T     | c.(3157-3159)ctC>ctT   |
| G | c.404A>G      | c.(403-405)cAg>cGg     |
| A | c.5367C>T     | c.(5365-5367)gtC>gtT   |
| A | c.251G>A      | c.(250-252)gGa>gAa     |
| C | c.2066G>C     | c.(2065-2067)cGg>cCg   |
| A | c.1380G>A     | c.(1378-1380)agG>agA   |
| T | c.2773C>T     | c.(2773-2775)Caa>Taa   |
| T | c.314C>T      | c.(313-315)tCc>tTc     |
| A | c.1826C>T     | c.(1825-1827)gCc>gTc   |
| A | c.445G>A      | c.(445-447)Gaa>Aaa     |
| A | c.751G>A      | c.(751-753)Gac>Aac     |
| T | c.348C>T      | c.(346-348)gcC>gcT     |
| T | c.1356C>T     | c.(1354-1356)tcC>tcT   |
| A | c.621G>A      | c.(619-621)caG>caA     |
| A | c.66G>A       | c.(64-66)ggG>ggA       |



|   |               |                      |
|---|---------------|----------------------|
| A | c.1428G>A     | c.(1426-1428)ggG>ggA |
| A | c.218A>T      | c.(217-219)gAt>gTt   |
| T | c.1000C>T     | c.(1000-1002)Ctc>Ttc |
| T | c.182G>T      | c.(181-183)gGa>gTa   |
| A | c.406C>T      | c.(406-408)Ccc>Tcc   |
| T |               |                      |
| T | c.4445G>A     | c.(4444-4446)cGa>cAa |
| A |               |                      |
| T | c.1160G>T     | c.(1159-1161)aGt>aTt |
| A | c.1187C>T     | c.(1186-1188)cCa>cTa |
| A | c.702_splice  | c.e6+1               |
| T | c.1211C>T     | c.(1210-1212)cCt>cTt |
| A | c.4485C>T     | c.(4483-4485)tcC>tcT |
| A | c.3548C>T     | c.(3547-3549)cCc>cTc |
| A | c.4738C>T     | c.(4738-4740)Cga>Tga |
| C |               |                      |
| A | c.4245C>T     | c.(4243-4245)ccC>ccT |
| T | c.514G>A      | c.(514-516)Ggc>Agc   |
| A | c.635C>T      | c.(634-636)tCc>tTc   |
| A | c.1434C>T     | c.(1432-1434)ctC>ctT |
| T | c.2298G>A     | c.(2296-2298)gaG>gaA |
| A |               |                      |
| T | c.17293G>A    |                      |
| A |               |                      |
| T |               |                      |
| A | c.6632C>T     | c.(6631-6633)tCc>tTc |
| A | c.1239C>T     | c.(1237-1239)gcC>gcT |
| A |               |                      |
| A | c.2747_splice | c.e8-1               |
| A | c.188A>T      | c.(187-189)aAa>aTa   |
| A | c.966C>T      | c.(964-966)ttC>ttT   |
| T | c.314C>T      | c.(313-315)gCt>gTt   |
| A | c.696C>T      | c.(694-696)ttC>ttT   |
| A | c.950G>A      | c.(949-951)gGt>gAt   |
| A | c.1236C>A     | c.(1234-1236)ttC>ttA |
| A | c.3827C>T     | c.(3826-3828)tCc>tTc |
| C | c.101G>C      | c.(100-102)tGg>tCg   |
| T | c.5941C>T     | c.(5941-5943)Ccc>Tcc |
| A | c.628G>T      | c.(628-630)Gag>Tag   |
| T |               |                      |
| T | c.4203_splice | c.e25-1              |
| A | c.535G>A      | c.(535-537)Gat>Aat   |
| T |               |                      |

|   |           |                      |
|---|-----------|----------------------|
| T |           |                      |
| T | c.1597C>T | c.(1597-1599)Cag>Tag |
| C |           |                      |
| T | c.1384C>T | c.(1384-1386)Ccc>Tcc |
| A | c.5974C>T | c.(5974-5976)Caa>Taa |
| T | c.250C>T  | c.(250-252)Cag>Tag   |
| T | c.522C>T  | c.(520-522)ggC>ggT   |
| A |           |                      |
| T | c.5022G>A | c.(5020-5022)acG>acA |
| A | c.2478C>T | c.(2476-2478)gtC>gtT |
| T | c.6209C>T | c.(6208-6210)tCc>tTc |
| A | c.552C>T  | c.(550-552)gtC>gtT   |
| A |           |                      |
| T | c.2678C>T | c.(2677-2679)cCa>cTa |
| T | c.2254G>T | c.(2254-2256)Gga>Tga |
| T | c.205C>T  | c.(205-207)Cct>Tct   |
| T | c.191C>T  | c.(190-192)cCc>cTc   |
| A | c.673C>T  | c.(673-675)Cgc>Tgc   |
| A | c.3343C>T | c.(3343-3345)Cgg>Tgg |
| T |           |                      |
| T | c.1015G>A | c.(1015-1017)Gat>Aat |
| T | c.1363C>T | c.(1363-1365)Ccg>Tcg |
| T | c.177C>T  | c.(175-177)gcC>gcT   |
| G |           |                      |
| T | c.3142G>A | c.(3142-3144)Gga>Aga |
| A | c.1344C>T | c.(1342-1344)atC>atT |
| A |           |                      |
| A | c.1516G>A | c.(1516-1518)Gaa>Aaa |
| T | c.212C>T  | c.(211-213)tCc>tTc   |
| T | c.852C>T  | c.(850-852)ggC>ggT   |
| T | c.189C>T  | c.(187-189)gcC>gcT   |
| A | c.2938C>T | c.(2938-2940)Cgg>Tgg |
| T | c.715G>A  | c.(715-717)Gag>Aag   |
| T | c.202C>T  | c.(202-204)Cag>Tag   |
| T | c.1795G>A | c.(1795-1797)Gag>Aag |
| A | c.780G>A  | c.(778-780)ctG>ctA   |
| C | c.870T>G  | c.(868-870)gtT>gtG   |
| A | c.242G>A  | c.(241-243)gGa>gAa   |
| A | c.453C>T  | c.(451-453)ttC>ttT   |
| T | c.1908G>A | c.(1906-1908)ggG>ggA |
| A | c.647C>A  | c.(646-648)aCc>aAc   |
| T | c.1904C>T | c.(1903-1905)tCg>tTg |
| G | c.806T>G  | c.(805-807)aTc>aGc   |

|   |               |                        |
|---|---------------|------------------------|
| T | c.183G>A      | c.(181-183)ggG>ggA     |
| T | c.2575G>A     | c.(2575-2577)Gaa>Aaa   |
| A | c.2952C>T     | c.(2950-2952)gcC>gcT   |
| T | c.1222C>T     | c.(1222-1224)Cgt>Tgt   |
| A | c.543G>A      | c.(541-543)aaG>aaA     |
| A |               |                        |
| A | c.2121G>A     | c.(2119-2121)aaG>aaA   |
| T |               |                        |
| A | c.419G>A      | c.(418-420)cGa>cAa     |
| A | c.223G>A      | c.(223-225)Gaa>Aaa     |
| C |               |                        |
| T | c.6080C>T     | c.(6079-6081)tCc>tTc   |
| A | c.445C>T      | c.(445-447)Caa>Taa     |
| T | c.1804C>T     | c.(1804-1806)Cag>Tag   |
| T | c.1216G>A     | c.(1216-1218)Gaa>Aaa   |
| A | c.1410C>T     | c.(1408-1410)tcC>tcT   |
| T | c.19G>A       | c.(19-21)Gat>Aat       |
| T | c.2431G>A     | c.(2431-2433)Gac>Aac   |
| T | c.18921G>A    | c.(18919-18921)ggG>ggA |
| A | c.809G>A      | c.(808-810)gGa>gAa     |
| T | c.584C>T      | c.(583-585)tCc>tTc     |
| A | c.610G>A      | c.(610-612)Gag>Aag     |
| A | c.801G>A      | c.(799-801)ctG>ctA     |
| T | c.1016G>A     | c.(1015-1017)cGg>cAg   |
| T | c.272C>T      | c.(271-273)tCc>tTc     |
| T | c.1416C>T     | c.(1414-1416)tcC>tcT   |
| T | c.1500C>T     | c.(1498-1500)ttC>ttT   |
| T | c.3890_splice | c.e19+1                |
| C | c.3733T>G     | c.(3733-3735)Tac>Gac   |
| C | c.475A>G      | c.(475-477)Aat>Gat     |
| A | c.773A>T      | c.(772-774)tAc>tTc     |
| T | c.4383C>T     | c.(4381-4383)ggC>ggT   |
| A | c.4860C>T     | c.(4858-4860)tcC>tcT   |
| T | c.7033C>T     | c.(7033-7035)Caa>Taa   |
| A | c.484G>A      | c.(484-486)Gaa>Aaa     |
| A |               |                        |
| T | c.468C>T      | c.(466-468)tcC>tcT     |
| C | c.362T>C      | c.(361-363)gTt>gCt     |
| T | c.845C>T      | c.(844-846)tCg>tTg     |
| C | c.2198T>G     | c.(2197-2199)tTc>tGc   |
| A | c.143G>A      | c.(142-144)cGc>cAc     |
| A | c.1364C>A     | c.(1363-1365)tCa>tAa   |
| T | c.1865G>A     | c.(1864-1866)gGg>gAg   |

|   |            |                        |
|---|------------|------------------------|
| T |            |                        |
| T | c.223G>A   | c.(223-225)Gga>Aga     |
| T | c.3563C>T  | c.(3562-3564)gCc>gTc   |
| T | c.571C>T   | c.(571-573)Cgt>Tgt     |
| T | c.1639G>A  | c.(1639-1641)Ggt>Agt   |
| T | c.480G>A   | c.(478-480)caG>caA     |
| T | c.172C>T   | c.(172-174)Cac>Tac     |
| T | c.1583G>A  | c.(1582-1584)gGa>gAa   |
| T | c.1499C>T  | c.(1498-1500)tCc>tTc   |
| C | c.381T>C   | c.(379-381)tgT>tgC     |
| T | c.493G>A   | c.(493-495)Gat>Aat     |
| T | c.1196G>A  | c.(1195-1197)gGa>gAa   |
| T | c.164G>A   | c.(163-165)gGa>gAa     |
| T | c.547C>T   | c.(547-549)Cca>Tca     |
| A | c.3176C>T  | c.(3175-3177)cCa>cTa   |
| T | c.353C>T   | c.(352-354)gCg>gTg     |
| A | c.2283G>A  | c.(2281-2283)caG>caA   |
| T | c.1026T>A  | c.(1024-1026)acT>acA   |
| G | c.433C>G   | c.(433-435)Cgc>Ggc     |
| T | c.7977G>A  | c.(7975-7977)caG>caA   |
| A | c.1160C>T  | c.(1159-1161)tCc>tTc   |
| A | c.1185G>A  | c.(1183-1185)ctG>ctA   |
| A | c.6456C>T  | c.(6454-6456)atC>atT   |
| T | c.1241C>T  | c.(1240-1242)tCg>tTg   |
| T | c.136C>T   | c.(136-138)Cct>Tct     |
| T | c.335C>T   | c.(334-336)cCg>cTg     |
| A | c.2245C>T  | c.(2245-2247)Cca>Tca   |
| T | c.573C>T   | c.(571-573)ttC>ttT     |
| T | c.1198G>A  | c.(1198-1200)Gca>Aca   |
| T | c.1558G>A  | c.(1558-1560)Gtg>Atg   |
| T | c.11135C>T | c.(11134-11136)tCa>tTa |
| A | c.4258G>A  | c.(4258-4260)Gac>Aac   |
| A | c.1447G>A  | c.(1447-1449)Gga>Aga   |
| T | c.170C>T   | c.(169-171)tCc>tTc     |
| T | c.595G>A   | c.(595-597)Gat>Aat     |
| T | c.458C>T   | c.(457-459)tCa>tTa     |
| T | c.295C>T   | c.(295-297)Ccc>Tcc     |
| G |            |                        |
| T | c.2371G>A  | c.(2371-2373)Gga>Aga   |
| A | c.135G>A   | c.(133-135)gtG>gtA     |
| A | c.4893C>T  | c.(4891-4893)atC>atT   |
| A | c.1927C>T  | c.(1927-1929)Cca>Tca   |
| A |            |                        |

|   |               |                      |
|---|---------------|----------------------|
| C | c.1309T>C     | c.(1309-1311)Ttc>Ctc |
| T |               |                      |
| T |               |                      |
| T |               |                      |
| T | c.844C>T      | c.(844-846)Cat>Tat   |
| T | c.589C>T      | c.(589-591)Cgg>Tgg   |
| T | c.978G>A      | c.(976-978)ggG>ggA   |
| T | c.5284T>A     | c.(5284-5286)Ttc>Atc |
| T | c.5587G>A     | c.(5587-5589)Gag>Aag |
| T | c.1368G>A     | c.(1366-1368)atG>atA |
| A |               |                      |
| A | c.33C>T       | c.(31-33)ttC>ttT     |
| G | c.828A>G      | c.(826-828)acA>acG   |
| T | c.2040A>T     | c.(2038-2040)gaA>gaT |
| A | c.2853C>T     | c.(2851-2853)ttC>ttT |
| T | c.192C>T      | c.(190-192)ccC>ccT   |
| T | c.1151G>A     | c.(1150-1152)gGg>gAg |
| T | c.136_splice  | c.e2+1               |
| T |               |                      |
| A | c.639G>A      | c.(637-639)atG>atA   |
| G | c.1015A>G     | c.(1015-1017)Act>Gct |
| T | c.1188C>T     | c.(1186-1188)tcC>tcT |
| T | c.759_splice  | c.e2+1               |
| A | c.1112C>T     | c.(1111-1113)cCc>cTc |
| T |               |                      |
| T | c.6522C>T     | c.(6520-6522)atC>atT |
| T | c.3757G>A     | c.(3757-3759)Gat>Aat |
| T |               |                      |
| A | c.159C>T      | c.(157-159)tcC>tcT   |
| A | c.1816G>A     | c.(1816-1818)Gat>Aat |
| A | c.1431C>T     | c.(1429-1431)ttC>ttT |
| T | c.3461_splice | c.e29+1              |
| T | c.1162G>A     | c.(1162-1164)Gat>Aat |
| A | c.180C>T      |                      |
| A | c.3791C>T     | c.(3790-3792)cCg>cTg |
| T | c.1164C>T     | c.(1162-1164)gtC>gtT |
| T |               |                      |
| T | c.1038C>T     | c.(1036-1038)atC>atT |
| C |               |                      |
| A | c.2260C>T     | c.(2260-2262)Cct>Tct |
| A | c.5741G>A     | c.(5740-5742)gGa>gAa |
| A |               |                      |
| A | c.7712C>T     | c.(7711-7713)tCa>tTa |

|   |            |                        |
|---|------------|------------------------|
| T |            |                        |
| T | c.2149C>T  | c.(2149-2151)Ctc>Ttc   |
| T | c.904G>A   | c.(904-906)Gat>Aat     |
| A |            |                        |
| T | c.739C>T   | c.(739-741)Cgg>Tgg     |
| A | c.174C>T   | c.(172-174)tcC>tcT     |
| T | c.7137C>T  | c.(7135-7137)ctC>ctT   |
| T | c.2675G>A  | c.(2674-2676)gGa>gAa   |
| T | c.309C>T   | c.(307-309)ctC>ctT     |
| T | c.856C>T   | c.(856-858)Cca>Tca     |
| A | c.1689C>T  | c.(1687-1689)ctC>ctT   |
| A | c.777C>A   | c.(775-777)tcC>tcA     |
| A | c.2955C>T  | c.(2953-2955)ttC>ttT   |
| A | c.868G>A   | c.(868-870)Gat>Aat     |
| T | c.394G>A   | c.(394-396)Gaa>Aaa     |
| T | c.465C>T   | c.(463-465)acC>acT     |
| T | c.2230C>T  | c.(2230-2232)Cgc>Tgc   |
| C |            |                        |
| T |            |                        |
| T | c.10911G>A | c.(10909-10911)gaG>gaA |
| A |            |                        |
| T |            |                        |
| T | c.1091G>A  | c.(1090-1092)cGa>cAa   |
| T | c.796C>T   | c.(796-798)Cct>Tct     |
| A | c.412C>T   | c.(412-414)Cgg>Tgg     |
| A | c.864C>T   | c.(862-864)atC>atT     |
| G | c.714A>G   | c.(712-714)gaA>gaG     |
| A | c.1303G>A  | c.(1303-1305)Gat>Aat   |
| A | c.2627C>T  | c.(2626-2628)gCt>gTt   |
| A | c.99G>A    | c.(97-99)ggG>ggA       |
| A | c.612G>A   | c.(610-612)caG>caA     |
| T | c.1126C>T  | c.(1126-1128)Cgt>Tgt   |
| T |            |                        |
| A | c.3043C>T  | c.(3043-3045)Cgt>Tgt   |
| A | c.215G>A   | c.(214-216)tGg>tAg     |
| A | c.8121C>T  | c.(8119-8121)atC>atT   |
| A | c.721C>T   | c.(721-723)Cgg>Tgg     |
| T | c.181C>A   | c.(181-183)Caa>Aaa     |
| T | c.584G>A   | c.(583-585)aGg>aAg     |
| A | c.465G>A   | c.(463-465)ccG>ccA     |
| A | c.2144G>A  | c.(2143-2145)gGa>gAa   |
| A |            |                        |
| T | c.471G>A   | c.(469-471)ggG>ggA     |

|   |              |                        |
|---|--------------|------------------------|
| A | c.249G>T     | c.(247-249)caG>caT     |
| A | c.288C>T     | c.(286-288)atC>atT     |
| T | c.1050C>T    | c.(1048-1050)tcC>tcT   |
| T | c.1936C>T    | c.(1936-1938)Cgc>Tgc   |
| T | c.1180G>A    | c.(1180-1182)Gat>Aat   |
| A | c.291_splice | c.e3-1                 |
| A |              |                        |
| T | c.-36_splice | c.e1-1                 |
| G | c.1860C>G    | c.(1858-1860)atC>atG   |
| A | c.204C>T     | c.(202-204)ttC>ttT     |
| C |              |                        |
| A |              |                        |
| T | c.1378G>A    | c.(1378-1380)Ggt>Agt   |
| G | c.690T>G     | c.(688-690)caT>caG     |
| T | c.1227G>A    | c.(1225-1227)atG>atA   |
| A | c.1574C>T    | c.(1573-1575)cCt>cTt   |
| A | c.1465C>T    | c.(1465-1467)Ccc>Tcc   |
| A |              |                        |
| T | c.2310G>A    | c.(2308-2310)gcG>gcA   |
| A |              |                        |
| A | c.137C>T     | c.(136-138)tCc>tTc     |
| T | c.347G>A     | c.(346-348)gGa>gAa     |
| A | c.2189C>T    | c.(2188-2190)gCc>gTc   |
| T |              |                        |
| A | c.2292G>A    | c.(2290-2292)ccG>ccA   |
| C | c.1491T>G    | c.(1489-1491)gaT>gaG   |
| T | c.161C>T     | c.(160-162)tCc>tTc     |
| T | c.1002G>A    | c.(1000-1002)ctG>ctA   |
| G | c.152T>C     | c.(151-153)aTt>aCt     |
| G | c.834A>G     | c.(832-834)atA>atG     |
| T | c.757C>T     | c.(757-759)Cag>Tag     |
| A | c.3945G>A    | c.(3943-3945)atG>atA   |
| T | c.78G>A      | c.(76-78)aaG>aaA       |
| T |              |                        |
| A | c.3312G>A    | c.(3310-3312)agG>agA   |
| A | c.2343G>A    | c.(2341-2343)tcG>tcA   |
| T | c.17411G>A   | c.(17410-17412)cGa>cAa |
| T | c.283G>A     | c.(283-285)Gaa>Aaa     |
| A | c.1144G>A    | c.(1144-1146)Gct>Act   |
| A |              |                        |
| T | c.1133G>A    | c.(1132-1134)gGa>gAa   |
| A | c.642G>A     | c.(640-642)atG>atA     |
| A | c.349G>A     | c.(349-351)Gat>Aat     |

|   |              |                        |
|---|--------------|------------------------|
| A |              |                        |
| C | c.2811T>G    | c.(2809-2811)tgT>tgG   |
| A | c.71C>A      | c.(70-72)aCg>aAg       |
| A | c.1475G>A    | c.(1474-1476)aGg>aAg   |
| A | c.672G>A     | c.(670-672)gaG>gaA     |
| A | c.864C>T     | c.(862-864)atC>atT     |
| A | c.1567C>T    | c.(1567-1569)Ctg>Ttg   |
| T | c.1851C>T    | c.(1849-1851)ttC>ttT   |
| A | c.1526G>A    | c.(1525-1527)gGa>gAa   |
| A | c.769G>A     | c.(769-771)Gag>Aag     |
| A | c.1300C>T    | c.(1300-1302)Cgc>Tgc   |
| A |              |                        |
| A | c.4G>A       | c.(4-6)Gtt>Att         |
| T |              |                        |
| A | c.5220C>T    | c.(5218-5220)ctC>ctT   |
| A | c.31939G>T   | c.(31939-31941)Gaa>Taa |
| T | c.708C>T     | c.(706-708)ttC>ttT     |
| T | c.1769C>T    | c.(1768-1770)tCg>tTg   |
| T | c.2356C>T    | c.(2356-2358)Ccc>Tcc   |
| A | c.5151C>T    | c.(5149-5151)ccC>ccT   |
| T | c.697G>A     | c.(697-699)Gac>Aac     |
| T | c.55C>T      | c.(55-57)Cga>Tga       |
| G | c.1373G>C    | c.(1372-1374)cGg>cCg   |
| A | c.505_splice | c.e3+1                 |
| A |              |                        |
| T | c.598G>A     | c.(598-600)Gtg>Atg     |
| A | c.2316G>A    | c.(2314-2316)ggG>ggA   |
| C |              |                        |
| T | c.1994C>T    | c.(1993-1995)gCc>gTc   |
| T |              |                        |
| T | c.1344G>A    | c.(1342-1344)ggG>ggA   |
| A | c.1384C>T    | c.(1384-1386)Ctg>Ttg   |
| A |              |                        |
| A | c.1878G>A    | c.(1876-1878)atG>atA   |
| T | c.398G>A     | c.(397-399)tGt>tAt     |
| A | c.928C>T     | c.(928-930)Cat>Tat     |
| T |              |                        |
| A | c.3202C>T    | c.(3202-3204)Cag>Tag   |
| A | c.950T>A     | c.(949-951)aTa>aAa     |
| T | c.13947C>T   | c.(13945-13947)ctC>ctT |
| A | c.1392C>T    | c.(1390-1392)ctC>ctT   |
| A | c.3515C>T    | c.(3514-3516)tCt>tTt   |
| A | c.885C>T     | c.(883-885)atC>atT     |



|   |           |                      |
|---|-----------|----------------------|
| A |           |                      |
| A | c.68C>T   | c.(67-69)tCc>tTc     |
| T | c.411G>A  | c.(409-411)caG>caA   |
| A | c.439C>T  | c.(439-441)Cct>Tct   |
| T | c.3089G>A | c.(3088-3090)gGa>gAa |
| T | c.616C>A  | c.(616-618)Ctt>Att   |
| T | c.800C>T  | c.(799-801)tCc>tTc   |
| T | c.1933C>T | c.(1933-1935)Cat>Tat |
| A | c.677C>T  | c.(676-678)cCc>cTc   |
| T | c.724G>A  | c.(724-726)Ggc>Agc   |
| T |           |                      |
| A | c.825C>T  | c.(823-825)tcC>tcT   |
| A | c.596A>T  | c.(595-597)aAt>aTt   |
| T | c.382G>A  | c.(382-384)Gtt>Att   |
| C | c.547A>G  | c.(547-549)Aag>Gag   |
| A | c.474C>T  | c.(472-474)atC>atT   |
| T | c.968C>T  | c.(967-969)tCc>tTc   |
| A | c.973C>T  | c.(973-975)Cgt>Tgt   |
| T | c.297C>T  | c.(295-297)ctC>ctT   |
| G | c.1257T>C | c.(1255-1257)ggT>ggC |
| T | c.607C>T  | c.(607-609)Cgt>Tgt   |
| A | c.859G>A  | c.(859-861)Gga>Aga   |
| A |           |                      |
| T |           |                      |
| T | c.334C>T  | c.(334-336)Cat>Tat   |
| A | c.646G>A  | c.(646-648)Gag>Aag   |
| T | c.744C>T  | c.(742-744)ttC>ttT   |
| C | c.2089T>C | c.(2089-2091)Ttg>Ctg |
| T |           |                      |
| A | c.105C>T  | c.(103-105)ttC>ttT   |
| A | c.1552C>T | c.(1552-1554)Cgt>Tgt |
| A | c.4650G>A | c.(4648-4650)agG>agA |
| T | c.413C>T  | c.(412-414)tCa>tTa   |
| T | c.743C>T  | c.(742-744)gCt>gTt   |
| A | c.3218G>A | c.(3217-3219)gGc>gAc |
| A | c.519G>A  | c.(517-519)atG>atA   |
| T | c.2842G>A | c.(2842-2844)Gat>Aat |
| T | c.836C>T  | c.(835-837)cCc>cTc   |
| T |           |                      |
| A | c.1400C>T | c.(1399-1401)cCa>cTa |
| A | c.1617C>A | c.(1615-1617)ttC>ttA |
| T |           |                      |
| A | c.9522C>T | c.(9520-9522)ctC>ctT |

|   |              |                        |
|---|--------------|------------------------|
| T |              |                        |
| A | c.897G>A     | c.(895-897)agG>agA     |
| A | c.1145G>A    | c.(1144-1146)aGa>aAa   |
| A | c.1252C>T    | c.(1252-1254)Cac>Tac   |
| A |              |                        |
| T | c.1548C>T    | c.(1546-1548)tgC>tgT   |
| T | c.359C>T     | c.(358-360)cCt>cTt     |
| A | c.737C>T     | c.(736-738)tCc>tTc     |
| T | c.1724C>T    | c.(1723-1725)aCc>aTc   |
| T | c.412A>T     | c.(412-414)Aaa>Taa     |
| A | c.1077G>A    | c.(1075-1077)agG>agA   |
| A | c.2618C>T    | c.(2617-2619)cCt>cTt   |
| T | c.464G>A     | c.(463-465)gGa>gAa     |
| T | c.1372G>A    | c.(1372-1374)Ggg>Agg   |
| T |              |                        |
| A | c.146C>T     | c.(145-147)cCt>cTt     |
| A | c.709C>T     | c.(709-711)Cat>Tat     |
| A | c.3400C>T    | c.(3400-3402)Cta>Tta   |
| T | c.137C>T     | c.(136-138)gCc>gTc     |
| A | c.2437G>A    | c.(2437-2439)Gac>Aac   |
| T | c.11004G>T   | c.(11002-11004)agG>agT |
| A | c.1784C>T    | c.(1783-1785)tCc>tTc   |
| T | c.279G>A     | c.(277-279)ggG>ggA     |
| A | c.1154G>A    | c.(1153-1155)tGg>tAg   |
| A | c.736G>A     |                        |
| A | c.74G>A      |                        |
| A | c.301C>T     | c.(301-303)Ctg>Ttg     |
| T | c.19C>T      | c.(19-21)Cgc>Tgc       |
| A |              |                        |
| T | c.2608G>A    | c.(2608-2610)Gct>Act   |
| A | c.1333G>A    | c.(1333-1335)Gat>Aat   |
| A | c.446C>T     | c.(445-447)tCt>tTt     |
| A | c.287C>T     | c.(286-288)aCc>aTc     |
| T | c.22C>T      | c.(22-24)Cct>Tct       |
| T | c.1467C>T    | c.(1465-1467)ccC>ccT   |
| G | c.1200T>C    | c.(1198-1200)aaT>aaC   |
| A | c.1229C>T    | c.(1228-1230)tCt>tTt   |
| A | c.1818C>T    | c.(1816-1818)ttC>ttT   |
| T | c.315_splice | c.e3+1                 |
| A | c.898G>A     | c.(898-900)Gtt>Att     |
| T |              |                        |
| A | c.3171C>T    | c.(3169-3171)ttC>ttT   |
| A | c.5958C>T    | c.(5956-5958)atC>atT   |

|   |               |                        |
|---|---------------|------------------------|
| T | c.1099C>T     | c.(1099-1101)Cga>Tga   |
| A | c.870G>A      | c.(868-870)gtG>gtA     |
| T | c.1466C>T     | c.(1465-1467)cCc>cTc   |
| T | c.1287G>A     | c.(1285-1287)gaG>gaA   |
| A | c.123G>A      | c.(121-123)tcG>tcA     |
| A | c.1707C>T     | c.(1705-1707)tcC>tcT   |
| T | c.996T>A      | c.(994-996)aaT>aaA     |
| T |               |                        |
| T |               |                        |
| G |               |                        |
| T |               |                        |
| A | c.727C>T      | c.(727-729)Cac>Tac     |
| T |               |                        |
| T | c.213G>A      | c.(211-213)aaG>aaA     |
| A |               |                        |
| A | c.1137C>T     | c.(1135-1137)ctC>ctT   |
| T |               |                        |
| T | c.2901G>A     | c.(2899-2901)aaG>aaA   |
| T | c.125C>T      | c.(124-126)tCc>tTc     |
| G | c.1106A>G     | c.(1105-1107)gAc>gGc   |
| A | c.223G>A      | c.(223-225)Gaa>Aaa     |
| T | c.496C>T      | c.(496-498)Cgt>Tgt     |
| A | c.883G>A      | c.(883-885)Gag>Aag     |
| A | c.1647_splice | c.e9+1                 |
| T | c.4948G>A     | c.(4948-4950)Gaa>Aaa   |
| A | c.293G>A      | c.(292-294)gGc>gAc     |
| A | c.2547C>T     | c.(2545-2547)gcC>gcT   |
| A | c.234C>T      | c.(232-234)atC>atT     |
| T | c.949G>A      | c.(949-951)Gaa>Aaa     |
| T | c.326C>T      | c.(325-327)cCc>cTc     |
| A | c.825C>T      | c.(823-825)ctC>ctT     |
| A | c.688G>A      | c.(688-690)Ggg>Agg     |
| T | c.1797G>A     | c.(1795-1797)cgG>cgA   |
| A | c.3994G>A     | c.(3994-3996)Gaa>Aaa   |
| A | c.15853C>T    | c.(15853-15855)Ccc>Tcc |
| A |               |                        |
| T | c.1291G>A     | c.(1291-1293)Gaa>Aaa   |
| T | c.3931C>T     | c.(3931-3933)Ccg>Tcg   |
| A |               |                        |
| A | c.1671G>A     | c.(1669-1671)ctG>ctA   |
| A | c.701G>A      | c.(700-702)cGc>cAc     |
| T |               |                        |
| T | c.164G>A      | c.(163-165)gGa>gAa     |

|   |            |                        |
|---|------------|------------------------|
| A |            |                        |
| A | c.116C>T   | c.(115-117)tCc>tTc     |
| A |            |                        |
| A | c.103C>T   | c.(103-105)Cct>Tct     |
| A |            |                        |
| G | c.449T>G   | c.(448-450)aTg>aGg     |
| A | c.518C>T   | c.(517-519)gCc>gTc     |
| T | c.476A>T   | c.(475-477)gAt>gTt     |
| T | c.708A>T   | c.(706-708)gaA>gaT     |
| A | c.612C>T   | c.(610-612)tcC>tcT     |
| C |            |                        |
| T |            |                        |
| A | c.123C>T   | c.(121-123)tcC>tcT     |
| T |            |                        |
| T | c.1944C>T  | c.(1942-1944)ttC>ttT   |
| A | c.2225C>T  | c.(2224-2226)tCt>tTt   |
| C | c.737T>C   | c.(736-738)gTt>gCt     |
| T | c.193C>T   | c.(193-195)Caa>Taa     |
| T | c.300C>T   | c.(298-300)ttC>ttT     |
| A | c.814C>T   | c.(814-816)Ctc>Ttc     |
| A |            |                        |
| T | c.1500G>A  | c.(1498-1500)agG>agA   |
| A |            |                        |
| A |            |                        |
| T | c.1395T>A  | c.(1393-1395)ctT>ctA   |
| A | c.570G>A   | c.(568-570)cgG>cgA     |
| T | c.150C>T   | c.(148-150)tcC>tcT     |
| T | c.2871C>T  | c.(2869-2871)atC>atT   |
| A | c.490G>A   | c.(490-492)Gaa>Aaa     |
| A | c.164G>A   | c.(163-165)gGa>gAa     |
| A | c.429C>T   | c.(427-429)tcC>tcT     |
| A |            |                        |
| T |            |                        |
| T | c.546C>T   | c.(544-546)ctC>ctT     |
| A | c.381C>T   | c.(379-381)gcC>gcT     |
| A | c.136G>A   | c.(136-138)Gat>Aat     |
| A |            |                        |
| A | c.12652C>T | c.(12652-12654)Ctg>Ttg |
| T |            |                        |
| A | c.442G>A   | c.(442-444)Ggc>Agc     |
| A | c.2192C>T  | c.(2191-2193)cCt>cTt   |
| T | c.1211C>T  | c.(1210-1212)tCc>tTc   |
| A | c.1328G>A  | c.(1327-1329)tGg>tAg   |

|   |           |                      |
|---|-----------|----------------------|
| A | c.473C>T  | c.(472-474)tCt>tTt   |
| A | c.51C>T   | c.(49-51)ttC>ttT     |
| T |           |                      |
| T | c.1759C>T | c.(1759-1761)Cca>Tca |
| T | c.6336C>T | c.(6334-6336)ggC>ggT |
| T | c.232C>T  | c.(232-234)Cag>Tag   |
| T | c.240G>A  | c.(238-240)atG>atA   |
| T |           |                      |
| G | c.778T>G  | c.(778-780)Ttc>Gtc   |
| T | c.2741G>A | c.(2740-2742)cGa>cAa |
| T |           |                      |
| T | c.5980G>A | c.(5980-5982)Gaa>Aaa |
| G | c.371T>C  | c.(370-372)gTt>gCt   |
| A | c.1189C>T | c.(1189-1191)Cct>Tct |
| A | c.1255G>A | c.(1255-1257)Gat>Aat |
| A | c.91G>A   | c.(91-93)Gaa>Aaa     |
| A | c.823C>T  | c.(823-825)Ccc>Tcc   |
| A | c.322C>T  | c.(322-324)Cct>Tct   |
| A | c.1109G>A | c.(1108-1110)tGg>tAg |
| T | c.2100G>A | c.(2098-2100)ccG>ccA |
| T | c.461C>T  | c.(460-462)tCc>tTc   |
| A | c.289C>T  | c.(289-291)Cca>Tca   |
| A | c.488G>A  | c.(487-489)gGg>gAg   |
| A | c.4399G>A | c.(4399-4401)Gac>Aac |
| T |           |                      |
| A | c.1482G>A | c.(1480-1482)ctG>ctA |
| A | c.418C>T  | c.(418-420)Cca>Tca   |
| T |           |                      |
| A | c.162C>T  | c.(160-162)atC>atT   |
| A | c.1128C>T | c.(1126-1128)tcC>tcT |
| A |           |                      |
| A | c.192C>T  | c.(190-192)acC>acT   |
| A | c.1671G>A | c.(1669-1671)gtG>gtA |
| A | c.1811C>T | c.(1810-1812)cCc>cTc |
| G | c.1534T>C | c.(1534-1536)Ttg>Ctg |
| T | c.170C>T  | c.(169-171)aCc>aTc   |
| A | c.6167C>T | c.(6166-6168)cCg>cTg |
| T | c.1110C>T | c.(1108-1110)tcC>tcT |
| T |           |                      |
| A |           |                      |
| T |           |                      |
| T | c.855G>A  | c.(853-855)atG>atA   |
| T | c.2997C>T | c.(2995-2997)atC>atT |

|   |            |                        |
|---|------------|------------------------|
| T | c.453G>A   | c.(451-453)gcG>gcA     |
| T | c.3235G>A  | c.(3235-3237)Gaa>Aaa   |
| T | c.188G>A   | c.(187-189)cGc>cAc     |
| C | c.1889G>C  | c.(1888-1890)tGt>tCt   |
| A | c.337G>A   | c.(337-339)Gaa>Aaa     |
| T | c.936C>T   | c.(934-936)acC>acT     |
| T | c.2087C>T  | c.(2086-2088)tCc>tTc   |
| C |            |                        |
| C | c.1506T>C  | c.(1504-1506)ggT>ggC   |
| A | c.10116T>A | c.(10114-10116)gaT>gaA |
| A | c.164C>T   | c.(163-165)tCc>tTc     |
| A |            |                        |
| T |            |                        |
| A | c.1453G>T  | c.(1453-1455)Gaa>Taa   |
| T |            |                        |
| A | c.4754C>T  | c.(4753-4755)gCg>gTg   |
| T | c.296C>T   | c.(295-297)cCc>cTc     |
| T | c.94C>T    | c.(94-96)Ccc>Tcc       |
| A | c.859G>A   | c.(859-861)Gaa>Aaa     |
| T |            |                        |
| T | c.172C>T   | c.(172-174)Ccc>Tcc     |
| T | c.384C>T   | c.(382-384)aaC>aaT     |
| C | c.584T>C   | c.(583-585)gTt>gCt     |
| A |            |                        |
| A | c.850C>T   | c.(850-852)Cgc>Tgc     |
| A | c.2569G>A  | c.(2569-2571)Gga>Aga   |
| C |            |                        |
| A |            |                        |
| A | c.61G>A    | c.(61-63)Ggc>Agc       |
| T |            |                        |
| A | c.2474G>A  | c.(2473-2475)gGc>gAc   |
| A | c.4950G>A  | c.(4948-4950)acG>acA   |
| T | c.838G>A   | c.(838-840)Gcc>Acc     |
| T | c.544C>T   | c.(544-546)Cga>Tga     |
| T | c.156C>T   | c.(154-156)atC>atT     |
| G | c.719C>G   |                        |
| T | c.837C>T   | c.(835-837)ttC>ttT     |
| T | c.192C>T   | c.(190-192)atC>atT     |
| A | c.694C>T   | c.(694-696)Cgc>Tgc     |
| A | c.1276C>T  | c.(1276-1278)Ccc>Tcc   |
| A | c.944G>A   | c.(943-945)gGa>gAa     |
| A | c.328G>A   | c.(328-330)Gaa>Aaa     |
| T |            |                        |

|   |            |                        |
|---|------------|------------------------|
| T |            |                        |
| T | c.87C>T    | c.(85-87)tcC>tcT       |
| T |            |                        |
| T |            |                        |
| G |            |                        |
| T | c.3600C>T  | c.(3598-3600)gtC>gtT   |
| A |            |                        |
| A |            |                        |
| A | c.1025G>A  | c.(1024-1026)gGa>gAa   |
| A | c.1233G>A  | c.(1231-1233)ccG>ccA   |
| A | c.4118C>T  | c.(4117-4119)tCa>tTa   |
| T | c.2240C>T  | c.(2239-2241)cCc>cTc   |
| G | c.13294A>C | c.(13294-13296)Aag>Cag |
| A | c.783G>A   | c.(781-783)acG>acA     |
| G | c.361C>G   | c.(361-363)Ctg>Gtg     |
| A | c.540G>A   | c.(538-540)caG>caA     |
| T | c.7264G>A  | c.(7264-7266)Gac>Aac   |
| A |            |                        |
| A |            |                        |
| T | c.1510C>T  | c.(1510-1512)Cca>Tca   |
| T | c.1690C>T  | c.(1690-1692)Cag>Tag   |
| T | c.1362C>T  | c.(1360-1362)atC>atT   |
| T | c.236G>A   | c.(235-237)aGa>aAa     |
| T |            |                        |
| T | c.1307G>A  | c.(1306-1308)gGa>gAa   |
| A | c.1172G>A  | c.(1171-1173)gGc>gAc   |
| G | c.3773T>C  | c.(3772-3774)gTc>gCc   |
| A | c.1037G>A  | c.(1036-1038)gGg>gAg   |
| T |            |                        |
| A |            |                        |
| A | c.636C>T   | c.(634-636)atC>atT     |
| T | c.489C>T   | c.(487-489)tcC>tcT     |
| C | c.176T>C   | c.(175-177)gTt>gCt     |
| A |            |                        |
| T | c.814G>A   | c.(814-816)Gac>Aac     |
| A | c.3219C>T  | c.(3217-3219)gtC>gtT   |
| T | c.230G>A   | c.(229-231)gGa>gAa     |
| A | c.721C>T   | c.(721-723)Cag>Tag     |
| A |            |                        |
| T | c.6978G>A  | c.(6976-6978)caG>caA   |
| T |            |                        |
| T | c.1821C>T  | c.(1819-1821)atC>atT   |
| A | c.2031G>A  | c.(2029-2031)atG>atA   |

|   |           |                      |
|---|-----------|----------------------|
| T |           |                      |
| A |           |                      |
| C |           |                      |
| A | c.2291C>A | c.(2290-2292)aCc>aAc |
| A | c.1534C>T | c.(1534-1536)Cga>Tga |
| T | c.1862C>T | c.(1861-1863)cCg>cTg |
| A | c.169A>T  | c.(169-171)Aac>Tac   |
| A |           |                      |
| T | c.1068G>A | c.(1066-1068)gcG>gcA |
| A |           |                      |
| T |           |                      |
| C | c.2T>C    | c.(1-3)aTg>aCg       |
| A | c.1190T>A | c.(1189-1191)gTa>gAa |
| T | c.3633G>A | c.(3631-3633)gtG>gtA |
| T | c.3033C>T | c.(3031-3033)ccC>ccT |
| T | c.935C>T  | c.(934-936)aCc>aTc   |
| A |           |                      |
| T | c.1740C>T | c.(1738-1740)ctC>ctT |
| T | c.4779G>A | c.(4777-4779)agG>agA |
| T | c.1524G>A | c.(1522-1524)gaG>gaA |
| T | c.2938G>A | c.(2938-2940)Gga>Aga |
| A | c.583C>T  | c.(583-585)Ctg>Ttg   |
| T | c.905C>T  | c.(904-906)aCc>aTc   |
| T | c.1060G>A | c.(1060-1062)Gaa>Aaa |
| A | c.11C>T   | c.(10-12)tCc>tTc     |
| T |           |                      |
| T | c.702C>T  | c.(700-702)ttC>ttT   |
| T |           |                      |
| A | c.695G>A  | c.(694-696)cGc>cAc   |
| T | c.2484C>T | c.(2482-2484)ttC>ttT |
| A |           |                      |
| A | c.854G>A  | c.(853-855)aGa>aAa   |
| A | c.1365G>A | c.(1363-1365)aaG>aaA |
| A | c.30C>T   | c.(28-30)acC>acT     |
| A | c.2771C>T |                      |
| A | c.594C>T  | c.(592-594)tgC>tgT   |
| A | c.304G>A  | c.(304-306)Gac>Aac   |
| T | c.3424C>T | c.(3424-3426)Cga>Tga |
| A | c.777C>T  | c.(775-777)ttC>ttT   |
| A | c.59C>T   | c.(58-60)tCc>tTc     |
| T | c.5702C>T | c.(5701-5703)tCc>tTc |
| A | c.1402G>A | c.(1402-1404)Gac>Aac |
| A | c.97C>T   | c.(97-99)Cca>Tca     |



|   |           |                      |
|---|-----------|----------------------|
| T | c.852G>A  | c.(850-852)atG>atA   |
| G | c.3025C>G | c.(3025-3027)Ctt>Gtt |
| A | c.363C>T  | c.(361-363)atC>atT   |
| T | c.15C>T   | c.(13-15)ccC>ccT     |
| T |           |                      |
| A | c.1466G>A | c.(1465-1467)aGg>aAg |
| A | c.327G>A  | c.(325-327)atG>atA   |
| T | c.4936A>T | c.(4936-4938)Aga>Tga |
| T |           |                      |
| T |           |                      |
| T | c.180G>A  | c.(178-180)acG>acA   |
| A | c.2481C>T | c.(2479-2481)gcC>gcT |
| A | c.2506C>T | c.(2506-2508)Cgt>Tgt |
| A | c.1004C>T | c.(1003-1005)gCc>gTc |
| A | c.2144C>T | c.(2143-2145)cCt>cTt |
| A | c.1483G>A | c.(1483-1485)Gtg>Atg |
| G | c.277A>G  | c.(277-279)Att>Gtt   |
| T | c.296G>A  | c.(295-297)cGt>cAt   |
| T |           |                      |
| G | c.2749A>G | c.(2749-2751)Aat>Gat |
| A |           |                      |
| A | c.2544C>T | c.(2542-2544)atC>atT |
| T | c.705G>A  | c.(703-705)ccG>ccA   |
| T | c.1527C>T | c.(1525-1527)gtC>gtT |
| A | c.959C>T  | c.(958-960)cCc>cTc   |
| A | c.1341C>T | c.(1339-1341)ttC>ttT |
| A |           |                      |
| A | c.303G>A  | c.(301-303)gtG>gtA   |
| A | c.212C>T  | c.(211-213)tCc>tTc   |
| T | c.8214G>A | c.(8212-8214)cgG>cgA |
| A | c.1437G>A | c.(1435-1437)tgG>tgA |
| T | c.581C>T  | c.(580-582)tCc>tTc   |
| T | c.717C>T  | c.(715-717)acC>acT   |
| A | c.4300G>A | c.(4300-4302)Gaa>Aaa |
| A | c.1218G>A | c.(1216-1218)aaG>aaA |
| T | c.468C>T  | c.(466-468)ttC>ttT   |
| A |           |                      |
| A | c.199G>A  | c.(199-201)Gtg>Atg   |
| A | c.9C>T    | c.(7-9)gaC>gaT       |
| A | c.557C>T  | c.(556-558)gCc>gTc   |
| A | c.5069C>T | c.(5068-5070)aCc>aTc |
| T | c.955C>T  | c.(955-957)Cct>Tct   |
| A | c.1572G>A | c.(1570-1572)ccG>ccA |

|   |               |                      |
|---|---------------|----------------------|
| T | c.3411G>A     | c.(3409-3411)gaG>gaA |
| A | c.685C>T      | c.(685-687)Cgc>Tgc   |
| C | c.1597_splice | c.e12-1              |
| T | c.592C>T      | c.(592-594)Cac>Tac   |
| A |               |                      |
| A | c.393G>A      | c.(391-393)agG>agA   |
| A | c.1571C>T     | c.(1570-1572)tCt>tTt |
| A | c.2229_splice | c.e15+1              |
| T |               |                      |
| T | c.1457T>A     | c.(1456-1458)tTg>tAg |
| T | c.1341C>T     | c.(1339-1341)ctC>ctT |
| A | c.822C>T      | c.(820-822)tcC>tcT   |
| T | c.202G>A      |                      |
| A | c.60G>A       | c.(58-60)gcG>gcA     |
| C | c.624C>G      | c.(622-624)gcC>gcG   |
| A | c.5290G>A     | c.(5290-5292)Gaa>Aaa |
| A | c.8235C>T     | c.(8233-8235)gcC>gcT |
| T | c.1473C>T     | c.(1471-1473)ttC>ttT |
| A | c.747G>A      | c.(745-747)gcG>gcA   |
| T | c.277G>A      | c.(277-279)Gga>Aga   |
| T | c.304C>T      | c.(304-306)Ctg>Ttg   |
| T | c.577G>A      | c.(577-579)Gat>Aat   |
| A | c.514G>A      | c.(514-516)Gcc>Acc   |
| A | c.378C>T      | c.(376-378)ccC>ccT   |
| T | c.988G>A      | c.(988-990)Gac>Aac   |
| G | c.3161G>C     | c.(3160-3162)aGc>aCc |
| T | c.1145C>T     | c.(1144-1146)aCc>aTc |
| A | c.3153G>A     | c.(3151-3153)ttG>ttA |
| T | c.2785G>A     | c.(2785-2787)Gat>Aat |
| T | c.1961C>T     | c.(1960-1962)tCc>tTc |
| C |               |                      |
| T | c.2242G>A     | c.(2242-2244)Gat>Aat |
| T | c.1524G>A     | c.(1522-1524)caG>caA |
| T | c.868G>A      | c.(868-870)Gaa>Aaa   |
| A | c.465C>T      | c.(463-465)ttC>ttT   |
| T | c.909C>T      | c.(907-909)gtC>gtT   |
| A | c.1299C>T     | c.(1297-1299)ggC>ggT |
| T |               |                      |
| T | c.7010G>A     |                      |
| A | c.514C>T      | c.(514-516)Ccc>Tcc   |
| T |               |                      |
| A | c.965G>A      | c.(964-966)gGc>gAc   |
| T | c.1197G>A     | c.(1195-1197)aaG>aaA |

|   |              |                        |
|---|--------------|------------------------|
| A | c.179C>T     | c.(178-180)tCg>tTg     |
| T | c.591C>T     | c.(589-591)ccC>ccT     |
| A | c.389G>A     | c.(388-390)tGg>tAg     |
| T | c.4571C>T    | c.(4570-4572)tCc>tTc   |
| A | c.1099G>A    | c.(1099-1101)Gag>Aag   |
| T | c.3389C>T    | c.(3388-3390)aCc>aTc   |
| A |              |                        |
| A | c.1127C>T    | c.(1126-1128)tCc>tTc   |
| A | c.7243G>A    | c.(7243-7245)Gat>Aat   |
| T | c.1781C>T    | c.(1780-1782)tCc>tTc   |
| T | c.4830G>A    | c.(4828-4830)agG>agA   |
| A | c.1013G>A    | c.(1012-1014)cGc>cAc   |
| T |              |                        |
| T | c.1247G>T    | c.(1246-1248)aGa>aTa   |
| T | c.1768G>A    | c.(1768-1770)Gac>Aac   |
| T | c.1578C>T    | c.(1576-1578)tcC>tcT   |
| C | c.2813T>C    | c.(2812-2814)gTt>gCt   |
| A | c.65C>T      | c.(64-66)tCc>tTc       |
| T | c.941A>T     | c.(940-942)gAg>gTg     |
| A | c.1335C>T    | c.(1333-1335)gtC>gtT   |
| T |              |                        |
| A | c.1686G>A    | c.(1684-1686)ttG>ttA   |
| A | c.393C>T     | c.(391-393)ggC>ggT     |
| T | c.1014C>T    | c.(1012-1014)ctC>ctT   |
| T | c.769C>T     | c.(769-771)Cgc>Tgc     |
| A | c.2581C>T    | c.(2581-2583)Cgg>Tgg   |
| T | c.171C>T     | c.(169-171)acC>acT     |
| A | c.590C>A     | c.(589-591)cCc>cAc     |
| A | c.30848C>T   | c.(30847-30849)tCa>tTa |
| A | c.3335C>T    | c.(3334-3336)tCc>tTc   |
| A | c.633_splice | c.e10+1                |
| T | c.716C>T     | c.(715-717)aCc>aTc     |
| A | c.1665G>A    | c.(1663-1665)caG>caA   |
| T | c.254G>A     | c.(253-255)gGa>gAa     |
| A | c.2529G>A    | c.(2527-2529)gaG>gaA   |
| A | c.1342C>T    | c.(1342-1344)Ctg>Ttg   |
| T | c.79G>A      | c.(79-81)Gat>Aat       |
| A | c.320C>T     | c.(319-321)tCc>tTc     |
| A | c.546C>T     | c.(544-546)gcC>gcT     |
| A | c.2153C>T    | c.(2152-2154)cCt>cTt   |
| T | c.1914C>T    | c.(1912-1914)ttC>ttT   |
| T | c.332C>T     | c.(331-333)tCg>tTg     |
| A | c.418C>T     | c.(418-420)Ccc>Tcc     |

|   |               |                      |
|---|---------------|----------------------|
| T | c.105C>T      | c.(103-105)ccC>ccT   |
| T |               |                      |
| A | c.2807C>T     | c.(2806-2808)cCc>cTc |
| A | c.368G>A      | c.(367-369)aGa>aAa   |
| A | c.768G>A      | c.(766-768)caG>caA   |
| A | c.406C>T      | c.(406-408)Cag>Tag   |
| T | c.514C>T      | c.(514-516)Cgt>Tgt   |
| T | c.3548G>A     | c.(3547-3549)gGc>gAc |
| A | c.563G>A      | c.(562-564)cGa>cAa   |
| T | c.856G>A      | c.(856-858)Gat>Aat   |
| T | c.2327C>T     | c.(2326-2328)tCa>tTa |
| A |               |                      |
| T | c.964G>A      | c.(964-966)Gaa>Aaa   |
| T |               |                      |
| T |               |                      |
| A | c.3150G>A     | c.(3148-3150)gaG>gaA |
| A | c.306C>T      | c.(304-306)cgC>cgT   |
| A | c.1186G>A     | c.(1186-1188)Gtg>Atg |
| A | c.4762G>A     | c.(4762-4764)Ggc>Agc |
| A | c.1731C>T     | c.(1729-1731)gtC>gtT |
| C | c.136G>C      |                      |
| A |               |                      |
| T |               |                      |
| A | c.2636C>T     | c.(2635-2637)tCg>tTg |
| T | c.867_splice  | c.e7-1               |
| A | c.3024C>T     | c.(3022-3024)atC>atT |
| G | c.2368A>G     | c.(2368-2370)Aaa>Gaa |
| T | c.2532C>T     | c.(2530-2532)ctC>ctT |
| A | c.3438_splice | c.e20-1              |
| C | c.1269A>C     | c.(1267-1269)ggA>ggC |
| C | c.65T>G       | c.(64-66)cTg>cGg     |
| A | c.1454C>T     | c.(1453-1455)tCc>tTc |
| T | c.217G>A      | c.(217-219)Gaa>Aaa   |
| T | c.1751C>T     | c.(1750-1752)cCc>cTc |
| A |               |                      |
| T | c.469C>A      | c.(469-471)Ccc>Acc   |
| T |               |                      |
| T | c.1575C>T     | c.(1573-1575)ttC>ttT |
| T | c.2221G>A     | c.(2221-2223)Gaa>Aaa |
| T | c.1898G>T     |                      |
| T |               |                      |
| A | c.1688C>T     | c.(1687-1689)cCa>cTa |

|   |               |                        |
|---|---------------|------------------------|
| A | c.533_splice  | c.e5-1                 |
| C | c.94A>G       | c.(94-96)Acc>Gcc       |
| T | c.2773C>T     | c.(2773-2775)Ctt>Ttt   |
| A | c.3205C>T     | c.(3205-3207)Ctc>Ttc   |
| A | c.1862G>A     | c.(1861-1863)gGa>gAa   |
| A | c.1819A>T     | c.(1819-1821)Act>Tct   |
| T | c.3816C>T     | c.(3814-3816)ccC>ccT   |
| A | c.2560G>A     | c.(2560-2562)Gac>Aac   |
| T |               |                        |
| T | c.860C>T      | c.(859-861)cCc>cTc     |
| A |               |                        |
| T | c.122C>T      | c.(121-123)aCc>aTc     |
| T | c.243G>A      | c.(241-243)atG>atA     |
| T | c.809G>A      | c.(808-810)gGc>gAc     |
| T | c.1631_splice | c.e13-1                |
| A | c.1181C>T     | c.(1180-1182)tCc>tTc   |
| G | c.1_splice    | c.e1-1                 |
| A | c.19139C>T    | c.(19138-19140)tCc>tTc |
| T | c.1239_splice | c.e10-1                |
| A | c.4432G>A     | c.(4432-4434)Gag>Aag   |
| G | c.423T>C      | c.(421-423)gcT>gcC     |
| T | c.1725C>T     | c.(1723-1725)acC>acT   |
| A | c.81C>T       | c.(79-81)gcC>gcT       |
| A | c.1687C>T     | c.(1687-1689)Cca>Tca   |
| A | c.1678C>T     | c.(1678-1680)Cct>Tct   |
| T | c.264C>T      | c.(262-264)ttC>ttT     |
| A | c.1573G>A     | c.(1573-1575)Gag>Aag   |
| A | c.408G>A      | c.(406-408)acG>acA     |
| T |               |                        |
| G | c.975_splice  | c.e9-1                 |
| T | c.6208C>T     | c.(6208-6210)Cca>Tca   |
| T | c.1748C>T     | c.(1747-1749)tCc>tTc   |
| T | c.3119G>A     | c.(3118-3120)gGa>gAa   |
| A | c.1436C>T     | c.(1435-1437)tCt>tTt   |
| T | c.2043G>A     | c.(2041-2043)atG>atA   |
| A | c.841G>A      | c.(841-843)Gga>Aga     |
| A | c.605T>A      | c.(604-606)tTt>tAt     |
| A | c.554C>T      | c.(553-555)cCa>cTa     |
| T | c.2598G>A     | c.(2596-2598)tcG>tcA   |
| T |               |                        |
| A | c.1362C>T     | c.(1360-1362)aaC>aaT   |
| A | c.1022C>T     | c.(1021-1023)cCc>cTc   |
| A | c.591C>T      | c.(589-591)ctC>ctT     |

|   |              |                        |
|---|--------------|------------------------|
| T | c.2493G>A    | c.(2491-2493)atG>atA   |
| T |              |                        |
| A | c.3135C>T    | c.(3133-3135)ttC>ttT   |
| T | c.476G>A     | c.(475-477)cGa>cAa     |
| A | c.505G>A     | c.(505-507)Ggg>Agg     |
| A | c.1944G>A    | c.(1942-1944)cgG>cgA   |
| T | c.253G>A     | c.(253-255)Gga>Aga     |
| T | c.2119C>T    | c.(2119-2121)Cca>Tca   |
| - | c.282delT    | c.(280-282)gatfs       |
| - | c.2261delC   | c.(2260-2262)tctfs     |
| - | c.1997delT   | c.(1996-1998)ttafs     |
| T | c.6702G>A    | c.(6700-6702)aaG>aaA   |
| T | c.2338C>T    | c.(2338-2340)Cgg>Tgg   |
| A | c.367G>A     | c.(367-369)Ggg>Agg     |
| C | c.8376T>C    | c.(8374-8376)ctT>ctC   |
| T | c.1430C>T    | c.(1429-1431)cCc>cTc   |
| T | c.430C>T     | c.(430-432)Caa>Taa     |
| T | c.517C>T     | c.(517-519)Ctc>Ttc     |
| T | c.1571C>T    | c.(1570-1572)gCt>gTt   |
| T | c.-19_splice | c.e2-1                 |
| T | c.498_splice | c.e5-1                 |
| T | c.354C>T     | c.(352-354)ccC>ccT     |
| T |              |                        |
| T | c.138C>T     | c.(136-138)gtC>gtT     |
| G | c.1553T>G    | c.(1552-1554)tTt>tGt   |
| T | c.748G>A     | c.(748-750)Gag>Aag     |
| G | c.73250T>C   | c.(73249-73251)gTt>gCt |
| C | c.4316T>C    | c.(4315-4317)tTc>tCc   |
| A | c.1497C>T    | c.(1495-1497)ttC>ttT   |
| T | c.216C>T     | c.(214-216)atC>atT     |
| A | c.805G>A     | c.(805-807)Gtc>Atc     |
| T | c.33C>T      | c.(31-33)ttC>ttT       |
| T | c.1323C>T    | c.(1321-1323)gtC>gtT   |
| T | c.737C>T     | c.(736-738)tCa>tTa     |
| A |              |                        |
| T | c.238C>T     | c.(238-240)Cga>Tga     |
| A | c.3012G>A    | c.(3010-3012)tcG>tcA   |
| A | c.1134T>A    | c.(1132-1134)acT>acA   |
| A | c.4869C>T    | c.(4867-4869)ttC>ttT   |
| T | c.2235C>T    | c.(2233-2235)tcC>tcT   |
| A | c.1639G>A    | c.(1639-1641)Gag>Aag   |
| T | c.1438C>T    | c.(1438-1440)Ctt>Ttt   |
| A | c.2181C>T    | c.(2179-2181)ggC>ggT   |

|   |           |                      |
|---|-----------|----------------------|
| A | c.771C>T  | c.(769-771)tcC>tcT   |
| T |           |                      |
| T | c.2016G>A | c.(2014-2016)ccG>ccA |
| A | c.1069C>T | c.(1069-1071)Cct>Tct |
| A | c.3384G>A | c.(3382-3384)atG>atA |
| T | c.4434G>A | c.(4432-4434)ggG>ggA |
| T | c.1903G>A | c.(1903-1905)Gaa>Aaa |
| A | c.124C>T  | c.(124-126)Cag>Tag   |
| T | c.394G>A  | c.(394-396)Ggt>Agt   |
| A | c.263G>A  | c.(262-264)gGa>gAa   |
| C | c.95T>G   | c.(94-96)gTg>gGg     |
| A | c.569C>T  | c.(568-570)tCc>tTc   |
| A |           |                      |
| T | c.4453G>A | c.(4453-4455)Gaa>Aaa |
| A | c.322C>T  | c.(322-324)Cct>Tct   |
| T | c.540G>A  | c.(538-540)aaG>aaA   |
| T | c.305G>A  | c.(304-306)gGa>gAa   |
| T | c.2273C>T | c.(2272-2274)cCt>cTt |
| T | c.1083C>T | c.(1081-1083)atC>atT |
| A | c.546G>A  | c.(544-546)aaG>aaA   |
| A | c.775C>T  | c.(775-777)Cca>Tca   |
| A | c.1048C>T | c.(1048-1050)Cgt>Tgt |
| A | c.2424G>A | c.(2422-2424)gtG>gtA |
| A | c.770C>T  | c.(769-771)tCg>tTg   |
| A | c.771C>T  | c.(769-771)tcC>tcT   |
| A | c.655C>T  | c.(655-657)Cgt>Tgt   |
| A |           |                      |
| T | c.654G>A  | c.(652-654)caG>caA   |
| T | c.950C>T  | c.(949-951)gCg>gTg   |
| A | c.668C>T  | c.(667-669)cCt>cTt   |
| T | c.3635C>T | c.(3634-3636)tCc>tTc |
| A |           |                      |
| A |           |                      |
| A | c.164C>T  | c.(163-165)tCc>tTc   |
| T | c.1280A>T | c.(1279-1281)gAg>gTg |
| A | c.546C>T  | c.(544-546)ttC>ttT   |
| G | c.508C>G  | c.(508-510)Cgg>Ggg   |
| A | c.2539G>A | c.(2539-2541)Gga>Aga |
| A | c.1374G>A | c.(1372-1374)cgG>cgA |
| A | c.1758G>A | c.(1756-1758)agG>agA |
| T | c.431C>T  | c.(430-432)cCa>cTa   |
| A | c.577C>T  | c.(577-579)Cct>Tct   |
| G | c.869T>G  | c.(868-870)aTc>aGc   |

|   |               |                      |
|---|---------------|----------------------|
| T |               |                      |
| G | c.353C>G      | c.(352-354)cCt>cGt   |
| A | c.4739C>T     | c.(4738-4740)tCt>tTt |
| T | c.4172G>A     | c.(4171-4173)gGa>gAa |
| T | c.150C>T      | c.(148-150)atC>atT   |
| A | c.595C>T      | c.(595-597)Ctg>Ttg   |
| A | c.1252G>A     | c.(1252-1254)Gaa>Aaa |
| A | c.2407C>T     | c.(2407-2409)Cgg>Tgg |
| T |               |                      |
| T | c.581C>T      | c.(580-582)tCa>tTa   |
| A | c.1813C>T     | c.(1813-1815)Cat>Tat |
| A | c.746C>T      | c.(745-747)tCc>tTc   |
| T | c.193G>A      | c.(193-195)Ggc>Agc   |
| A | c.315C>T      | c.(313-315)gcC>gcT   |
| A | c.1101C>T     | c.(1099-1101)acC>acT |
| A | c.1855C>T     | c.(1855-1857)Cag>Tag |
| A |               |                      |
| A | c.1619C>T     | c.(1618-1620)cCc>cTc |
| A | c.846G>A      | c.(844-846)tgG>tgA   |
| A | c.2923G>A     | c.(2923-2925)Gaa>Aaa |
| C | c.194A>G      | c.(193-195)aAt>aGt   |
| G | c.701G>C      | c.(700-702)gGc>gCc   |
| T | c.2077_splice | c.e11+1              |
| T |               |                      |
| A | c.227C>T      | c.(226-228)tCa>tTa   |
| A | c.2367C>T     | c.(2365-2367)tcC>tcT |
| T | c.393G>A      | c.(391-393)cgG>cgA   |
| T | c.738C>T      | c.(736-738)ttC>ttT   |
| T | c.3717C>T     | c.(3715-3717)acC>acT |
| T | c.338G>A      | c.(337-339)gGa>gAa   |
| A |               |                      |
| T | c.1222G>A     | c.(1222-1224)Gac>Aac |
| A |               |                      |
| A | c.1544C>T     | c.(1543-1545)tCg>tTg |
| T | c.92C>T       | c.(91-93)tCc>tTc     |
| A | c.736G>A      | c.(736-738)Gat>Aat   |
| T | c.2318C>T     | c.(2317-2319)tCc>tTc |
| A |               |                      |
| A | c.2804C>T     | c.(2803-2805)tCt>tTt |
| A | c.187G>A      | c.(187-189)Ggg>Agg   |
| T | c.2495C>T     | c.(2494-2496)tCc>tTc |
| T | c.652G>A      | c.(652-654)Gaa>Aaa   |
| A |               |                      |



|   |              |                        |
|---|--------------|------------------------|
| T | c.2441G>A    | c.(2440-2442)gGc>gAc   |
| T | c.1744G>A    | c.(1744-1746)Gaa>Aaa   |
| T |              |                        |
| A | c.466C>T     | c.(466-468)Ctt>Ttt     |
| T | c.1195C>T    | c.(1195-1197)Caa>Taa   |
| A | c.41C>T      | c.(40-42)tCc>tTc       |
| T | c.943G>A     | c.(943-945)Gca>Aca     |
| T | c.56_splice  | c.e2-1                 |
| T | c.524G>A     | c.(523-525)gGc>gAc     |
| A | c.699C>T     | c.(697-699)atC>atT     |
| A | c.829C>T     | c.(829-831)Cct>Tct     |
| T | c.1395C>T    | c.(1393-1395)atC>atT   |
| A | c.1197G>A    | c.(1195-1197)gcG>gcA   |
| T |              |                        |
| T | c.193C>T     | c.(193-195)Cat>Tat     |
| T | c.82709G>A   | c.(82708-82710)gGg>gAg |
| A | c.4353G>A    | c.(4351-4353)ctG>ctA   |
| T | c.720_splice | c.e6+1                 |
| T | c.1455C>T    | c.(1453-1455)agC>agT   |
| A | c.890G>A     | c.(889-891)gGt>gAt     |
| A | c.281C>T     | c.(280-282)tCc>tTc     |
| T | c.868C>A     | c.(868-870)Ctg>Atg     |
| A | c.1808C>T    | c.(1807-1809)tCc>tTc   |
| A | c.2094C>T    | c.(2092-2094)ccC>ccT   |
| C | c.1044G>C    | c.(1042-1044)gaG>gaC   |
| T | c.156C>T     | c.(154-156)atC>atT     |
| T | c.5383G>A    | c.(5383-5385)Gag>Aag   |
| T | c.1641C>T    | c.(1639-1641)atC>atT   |
| A | c.1053G>A    |                        |
| T | c.447C>T     | c.(445-447)atC>atT     |
| A | c.356_splice | c.e1+1                 |
| T | c.851C>T     | c.(850-852)tCc>tTc     |
| A |              |                        |
| A | c.235G>A     | c.(235-237)Gaa>Aaa     |
| T | c.255G>A     | c.(253-255)atG>atA     |
| A | c.75G>A      | c.(73-75)atG>atA       |
| A | c.390C>T     | c.(388-390)acC>acT     |
| A |              |                        |
| A | c.630G>A     | c.(628-630)ctG>ctA     |
| A | c.700G>A     | c.(700-702)Gcc>Acc     |
| C | c.10740G>C   | c.(10738-10740)tgG>tgC |
| T |              |                        |
| A | c.253C>T     | c.(253-255)Ctc>Ttc     |

|   |               |                        |
|---|---------------|------------------------|
| A | c.6211C>T     | c.(6211-6213)Cca>Tca   |
| T | c.1581C>T     | c.(1579-1581)acC>acT   |
| T | c.577G>A      | c.(577-579)Gaa>Aaa     |
| T | c.454G>A      | c.(454-456)Gaa>Aaa     |
| T | c.2174G>A     | c.(2173-2175)gGg>gAg   |
| A | c.9T>A        | c.(7-9)atT>atA         |
| A | c.1727G>A     |                        |
| C | c.1159A>G     | c.(1159-1161)Aaa>Gaa   |
| T | c.2835G>A     | c.(2833-2835)atG>atA   |
| A | c.3628G>A     | c.(3628-3630)Gat>Aat   |
| A | c.3794C>T     |                        |
| A | c.334C>T      | c.(334-336)Cca>Tca     |
| T |               |                        |
| T |               |                        |
| A | c.710C>T      | c.(709-711)cCt>cTt     |
| A | c.10987G>A    | c.(10987-10989)Gat>Aat |
| T | c.454G>A      | c.(454-456)Gat>Aat     |
| A | c.1643C>T     | c.(1642-1644)tCc>tTc   |
| T | c.2496C>T     | c.(2494-2496)atC>atT   |
| T | c.4763G>A     | c.(4762-4764)cGg>cAg   |
| A | c.750C>T      | c.(748-750)ttC>ttT     |
| A | c.3716G>A     | c.(3715-3717)gGc>gAc   |
| T | c.4586G>A     | c.(4585-4587)cGa>cAa   |
| T | c.656G>A      | c.(655-657)gGa>gAa     |
| T | c.651G>A      | c.(649-651)gtG>gtA     |
| A | c.374C>A      | c.(373-375)gCc>gAc     |
| A | c.1529G>A     | c.(1528-1530)gGa>gAa   |
| A | c.948C>T      | c.(946-948)ttC>ttT     |
| A | c.1734_splice | c.e22+1                |
| A | c.282G>A      | c.(280-282)ccG>ccA     |
| A | c.1062G>A     | c.(1060-1062)caG>caA   |
| A | c.947C>T      | c.(946-948)cCt>cTt     |
| T |               |                        |
| A | c.635C>T      | c.(634-636)tCc>tTc     |
| T | c.187C>T      | c.(187-189)Ctt>Ttt     |
| A | c.829G>A      | c.(829-831)Gtt>Att     |
| A | c.1643C>T     | c.(1642-1644)cCg>cTg   |
| A | c.1511C>T     | c.(1510-1512)tCg>tTg   |
| A | c.982C>T      | c.(982-984)Ccc>Tcc     |
| A | c.80C>T       | c.(79-81)tCt>tTt       |
| A | c.1284G>A     | c.(1282-1284)aaG>aaA   |
| T | c.1493G>A     | c.(1492-1494)cGa>cAa   |
| T | c.647C>T      | c.(646-648)tCt>tTt     |

|   |            |                        |
|---|------------|------------------------|
| A | c.1580C>T  | c.(1579-1581)tCa>tTa   |
| T |            |                        |
| A | c.1951C>T  | c.(1951-1953)Ctg>Ttg   |
| T | c.570C>T   | c.(568-570)tcC>tcT     |
| A | c.148C>T   | c.(148-150)Cag>Tag     |
| A | c.6434G>A  | c.(6433-6435)cGa>cAa   |
| A | c.2199C>T  | c.(2197-2199)ttC>ttT   |
| A | c.1941G>A  | c.(1939-1941)ccG>ccA   |
| T | c.540C>A   | c.(538-540)ttC>ttA     |
| T | c.62C>T    | c.(61-63)tCa>tTa       |
| T | c.1032C>T  | c.(1030-1032)ttC>ttT   |
| A |            |                        |
| A | c.721C>T   | c.(721-723)Cac>Tac     |
| A | c.1082C>T  | c.(1081-1083)cCc>cTc   |
| A | c.537C>T   | c.(535-537)ttC>ttT     |
| T | c.2598C>T  | c.(2596-2598)ggC>ggT   |
| A | c.1277G>A  | c.(1276-1278)gGg>gAg   |
| T | c.8C>T     | c.(7-9)cCc>cTc         |
| A | c.3233C>T  | c.(3232-3234)tCc>tTc   |
| T | c.2434G>A  | c.(2434-2436)Gaa>Aaa   |
| A | c.1372G>A  | c.(1372-1374)Gga>Aga   |
| A |            |                        |
| T |            |                        |
| A | c.1761G>A  | c.(1759-1761)ggG>ggA   |
| T | c.6330C>T  | c.(6328-6330)ttC>ttT   |
| T | c.104C>T   | c.(103-105)aCt>aTt     |
| T | c.550C>T   | c.(550-552)Cat>Tat     |
| T | c.90G>A    | c.(88-90)aaG>aaA       |
| T | c.729G>A   | c.(727-729)ccG>ccA     |
| A |            |                        |
| T | c.11021G>A | c.(11020-11022)gGa>gAa |
| A | c.4406C>T  | c.(4405-4407)cCc>cTc   |
| C |            |                        |
| T | c.313G>A   | c.(313-315)Gaa>Aaa     |
| A | c.967G>A   | c.(967-969)Gag>Aag     |
| A | c.502G>A   | c.(502-504)Ggg>Agg     |
| T | c.323C>T   | c.(322-324)gCc>gTc     |
| A | c.348G>A   | c.(346-348)ctG>ctA     |
| T | c.831G>A   | c.(829-831)tgG>tgA     |
| T | c.2289C>T  | c.(2287-2289)atC>atT   |
| T | c.441C>T   | c.(439-441)ggC>ggT     |
| C | c.569A>G   | c.(568-570)cAg>cGg     |
| A | c.692G>A   | c.(691-693)gGa>gAa     |

|   |              |                        |
|---|--------------|------------------------|
| A | c.1099G>A    | c.(1099-1101)Gag>Aag   |
| T | c.10056C>T   |                        |
| T | c.18C>T      | c.(16-18)acC>acT       |
| T |              |                        |
| A | c.19394C>T   | c.(19393-19395)tCa>tTa |
| T | c.7421G>A    | c.(7420-7422)gGa>gAa   |
| T | c.1515C>T    | c.(1513-1515)gtC>gtT   |
| A | c.261C>T     | c.(259-261)ttC>ttT     |
| T | c.945G>A     | c.(943-945)tgG>tgA     |
| T | c.424C>T     | c.(424-426)Cag>Tag     |
| A | c.9071G>A    | c.(9070-9072)gGa>gAa   |
| A | c.1173C>T    | c.(1171-1173)atC>atT   |
| A |              |                        |
| T |              |                        |
| T | c.752G>A     | c.(751-753)aGa>aAa     |
| T | c.167G>A     | c.(166-168)gGa>gAa     |
| A | c.90G>A      | c.(88-90)gaG>gaA       |
| A | c.262G>A     | c.(262-264)Gga>Aga     |
| A | c.187C>T     | c.(187-189)Ctg>Ttg     |
| A | c.540C>T     | c.(538-540)ttC>ttT     |
| A | c.457_splice | c.e4+1                 |
| T | c.666G>A     | c.(664-666)tcG>tcA     |
| T | c.1051C>T    | c.(1051-1053)Ctc>Ttc   |
| A | c.1120C>T    | c.(1120-1122)Ctg>Ttg   |
| A | c.364C>T     | c.(364-366)Cgt>Tgt     |
| A | c.1354C>T    | c.(1354-1356)Cct>Tct   |
| T | c.932C>T     | c.(931-933)gCc>gTc     |
| T |              |                        |
| A | c.981C>A     | c.(979-981)atC>atA     |
| T | c.884G>A     | c.(883-885)gGa>gAa     |
| T | c.1823G>A    | c.(1822-1824)tGa>tAa   |
| T | c.730C>T     | c.(730-732)Cat>Tat     |
| A | c.735C>T     | c.(733-735)atC>atT     |
| A | c.2757G>A    | c.(2755-2757)cgG>cgA   |
| A | c.1276G>A    | c.(1276-1278)Gac>Aac   |
| A |              |                        |
| A | c.267G>A     | c.(265-267)aaG>aaA     |
| T | c.384C>T     |                        |
| A | c.917C>T     | c.(916-918)tCa>tTa     |
| T | c.1290C>T    | c.(1288-1290)gtC>gtT   |
| A |              |                        |
| T | c.750C>T     | c.(748-750)atC>atT     |
| G | c.694A>G     | c.(694-696)Aaa>Gaa     |

|   |             |                      |
|---|-------------|----------------------|
| G | c.34A>C     | c.(34-36)Ata>Cta     |
| A | c.1606C>T   | c.(1606-1608)Ccc>Tcc |
| T | c.396T>A    | c.(394-396)taT>taA   |
| A | c.2347C>T   | c.(2347-2349)Cgt>Tgt |
| T | c.37_splice | c.e2-1               |
| T | c.5569G>A   | c.(5569-5571)Gaa>Aaa |
| A | c.2425G>A   | c.(2425-2427)Gga>Aga |
| A | c.1797G>A   | c.(1795-1797)cgG>cgA |
| A | c.1505C>T   | c.(1504-1506)tCc>tTc |
| C |             |                      |
| A | c.5285G>A   | c.(5284-5286)gGc>gAc |
| T |             |                      |
| A |             |                      |
| T | c.3614C>T   | c.(3613-3615)cCc>cTc |
| T | c.5227C>T   | c.(5227-5229)Cac>Tac |
| T |             |                      |
| A | c.713C>T    | c.(712-714)tCa>tTa   |
| T | c.220C>T    | c.(220-222)Cct>Tct   |
| A | c.1062G>A   | c.(1060-1062)atG>atA |
| T | c.258C>T    | c.(256-258)ctC>ctT   |
| T | c.4740G>A   | c.(4738-4740)tgG>tgA |
| C | c.3162A>C   | c.(3160-3162)ccA>ccC |
| A | c.5449G>A   | c.(5449-5451)Gac>Aac |
| T | c.1339C>T   | c.(1339-1341)Ccg>Tcg |
| A | c.157G>A    | c.(157-159)Gag>Aag   |
| T | c.885C>T    | c.(883-885)atC>atT   |
| A | c.95G>A     | c.(94-96)gGg>gAg     |
| T | c.1504G>A   | c.(1504-1506)Gac>Aac |
| T |             |                      |
| A | c.9855C>T   | c.(9853-9855)atC>atT |
| T | c.4670G>A   | c.(4669-4671)gGa>gAa |
| A | c.2519C>T   | c.(2518-2520)gCc>gTc |
| T | c.1264G>A   | c.(1264-1266)Gat>Aat |
| T | c.804C>T    | c.(802-804)gcC>gcT   |
| A | c.1271G>A   | c.(1270-1272)gGg>gAg |
| T | c.2078G>A   | c.(2077-2079)aGg>aAg |
| T | c.533C>T    | c.(532-534)tCc>tTc   |
| T | c.944C>T    | c.(943-945)tCa>tTa   |
| T | c.4788C>T   | c.(4786-4788)ggC>ggT |
| A | c.740C>A    | c.(739-741)cCc>cAc   |
| T | c.314C>T    | c.(313-315)gCc>gTc   |
| A |             |                      |
| T | c.483T>A    | c.(481-483)taT>taA   |

|   |           |                      |
|---|-----------|----------------------|
| A | c.8515G>A | c.(8515-8517)Gga>Aga |
| T | c.1565G>A | c.(1564-1566)gGc>gAc |
| T | c.625C>T  | c.(625-627)Cgg>Tgg   |
| A | c.567C>T  | c.(565-567)atC>atT   |
| A | c.1012G>T | c.(1012-1014)Gaa>Taa |
| T | c.1145G>A | c.(1144-1146)gGa>gAa |
| A | c.100G>A  | c.(100-102)Ggc>Agc   |
| T | c.1376G>A | c.(1375-1377)gGa>gAa |
| A | c.674T>A  | c.(673-675)aTt>aAt   |
| T |           |                      |
| A | c.588C>T  | c.(586-588)gcC>gcT   |
| T | c.1838C>T | c.(1837-1839)cCc>cTc |
| A | c.955G>A  | c.(955-957)Gaa>Aaa   |
| C |           |                      |
| A | c.3831C>T | c.(3829-3831)tcC>tcT |
| A | c.566C>T  | c.(565-567)cCc>cTc   |
| T | c.508G>A  | c.(508-510)Gaa>Aaa   |
| C | c.8383A>G | c.(8383-8385)Aac>Gac |
| T | c.1050C>T | c.(1048-1050)ccC>ccT |
| A | c.792G>A  | c.(790-792)gtG>gtA   |
| A | c.1896G>A | c.(1894-1896)ggG>ggA |
| A | c.1605C>T | c.(1603-1605)tgC>tgT |
| T | c.1266C>T | c.(1264-1266)ccC>ccT |
| A | c.1107C>T | c.(1105-1107)atC>atT |
| T | c.3952G>A | c.(3952-3954)Gag>Aag |
| T | c.562G>A  | c.(562-564)Gaa>Aaa   |
| G |           |                      |
| A | c.1098C>T | c.(1096-1098)ttC>ttT |
| T | c.1999G>A | c.(1999-2001)Gaa>Aaa |
| T | c.478G>A  | c.(478-480)Gga>Aga   |
| A |           |                      |
| T | c.1105G>A | c.(1105-1107)Gat>Aat |
| T |           |                      |
| T | c.258C>T  | c.(256-258)ctC>ctT   |
| T | c.1028G>A | c.(1027-1029)gGa>gAa |
| A | c.1939G>A | c.(1939-1941)Gga>Aga |
| A | c.2377G>A | c.(2377-2379)Gga>Aga |
| T | c.1033C>T | c.(1033-1035)Ccc>Tcc |
| T | c.29G>A   | c.(28-30)cGg>cAg     |
| A | c.4056C>T | c.(4054-4056)tcC>tcT |
| T | c.2428C>T | c.(2428-2430)Ctg>Ttg |
| T |           |                      |
| A | c.2690C>T | c.(2689-2691)tCt>tTt |

|   |              |                      |
|---|--------------|----------------------|
| A | c.3043G>A    | c.(3043-3045)Gaa>Aaa |
| T | c.2852C>T    | c.(2851-2853)cCt>cTt |
| T | c.517C>T     | c.(517-519)Cgg>Tgg   |
| T | c.1413C>T    | c.(1411-1413)ttC>ttT |
| T | c.1464C>T    | c.(1462-1464)ttC>ttT |
| A | c.454C>T     | c.(454-456)Cga>Tga   |
| T | c.812C>T     | c.(811-813)tCt>tTt   |
| A | c.658G>A     | c.(658-660)Gaa>Aaa   |
| T | c.982G>A     | c.(982-984)Gaa>Aaa   |
| T | c.6931C>T    | c.(6931-6933)Ctg>Ttg |
| T | c.4G>A       | c.(4-6)Gaa>Aaa       |
| A | c.510C>T     | c.(508-510)taC>taT   |
| T | c.1733G>A    | c.(1732-1734)gGc>gAc |
| T |              |                      |
| T | c.2009G>A    | c.(2008-2010)gGa>gAa |
| T |              |                      |
| A | c.143G>A     | c.(142-144)gGg>gAg   |
| T | c.101_splice | c.e4-1               |
| T | c.6861C>T    | c.(6859-6861)tgC>tgT |
| T | c.1783C>T    | c.(1783-1785)Cac>Tac |
| A | c.94G>A      | c.(94-96)Gaa>Aaa     |
| A | c.3270G>A    | c.(3268-3270)agG>agA |
| T | c.666C>T     | c.(664-666)ttC>ttT   |
| T | c.610C>T     | c.(610-612)Cgt>Tgt   |
| T | c.1628C>T    | c.(1627-1629)tCc>tTc |
| T | c.760G>A     | c.(760-762)Gaa>Aaa   |
| T | c.1387G>A    | c.(1387-1389)Gag>Aag |
| A | c.832C>T     | c.(832-834)Cac>Tac   |
| A |              |                      |
| T | c.60G>A      | c.(58-60)aaG>aaA     |
| T | c.598G>A     | c.(598-600)Gaa>Aaa   |
| A | c.136G>A     | c.(136-138)Gaa>Aaa   |
| A | c.463G>A     | c.(463-465)Gat>Aat   |
| A | c.660C>T     | c.(658-660)tcC>tcT   |
| T | c.1509C>T    | c.(1507-1509)taC>taT |
| C | c.820T>C     | c.(820-822)Ttc>Ctc   |
| G | c.378G>C     | c.(376-378)acG>acC   |
| A | c.9078C>T    | c.(9076-9078)tcC>tcT |
| T | c.642C>T     | c.(640-642)ttC>ttT   |
| T | c.1334C>T    | c.(1333-1335)tCc>tTc |
| T | c.938G>A     | c.(937-939)cGa>cAa   |
| A | c.51C>T      | c.(49-51)ttC>ttT     |
| A | c.367C>T     | c.(367-369)Ccc>Tcc   |

|   |              |                      |
|---|--------------|----------------------|
| A | c.249G>A     | c.(247-249)ggG>ggA   |
| A | c.926C>T     | c.(925-927)cCg>cTg   |
| A | c.1873C>T    | c.(1873-1875)Cct>Tct |
| T | c.793G>A     | c.(793-795)Ggg>Agg   |
| A |              |                      |
| T | c.942G>A     | c.(940-942)gtG>gtA   |
| T |              |                      |
| A | c.897C>T     | c.(895-897)atC>atT   |
| A | c.156C>T     | c.(154-156)ttC>ttT   |
| T |              |                      |
| A | c.1242G>A    | c.(1240-1242)gtG>gtA |
| T | c.630C>T     | c.(628-630)ttC>ttT   |
| A | c.574C>T     | c.(574-576)Cca>Tca   |
| A | c.894C>T     | c.(892-894)ttC>ttT   |
| T |              |                      |
| A | c.204_splice | c.e2+1               |
| T | c.3G>A       | c.(1-3)atG>atA       |
| A | c.1702A>T    | c.(1702-1704)Atg>Ttg |
| A | c.1148C>T    | c.(1147-1149)cCc>cTc |
| T | c.891C>T     | c.(889-891)tcC>tcT   |
| T | c.154C>T     | c.(154-156)Cat>Tat   |
| T | c.730C>T     | c.(730-732)Cct>Tct   |
| T |              |                      |
| A | c.57G>A      | c.(55-57)ggG>ggA     |
| A |              |                      |
| T | c.174G>A     | c.(172-174)atG>atA   |
| T | c.259G>A     | c.(259-261)Gat>Aat   |
| A | c.318C>T     | c.(316-318)ttC>ttT   |
| C | c.56A>G      | c.(55-57)cAa>cGa     |
| T | c.127C>T     | c.(127-129)Ctc>Ttc   |
| A |              |                      |
| A | c.4345C>T    | c.(4345-4347)Cgg>Tgg |
| A | c.1915C>T    | c.(1915-1917)Ctt>Ttt |
| T | c.1737C>T    | c.(1735-1737)ttC>ttT |
| A | c.133G>A     | c.(133-135)Gag>Aag   |
| A | c.797G>A     | c.(796-798)gGg>gAg   |
| T | c.581C>T     | c.(580-582)cCc>cTc   |
| T | c.1499C>T    | c.(1498-1500)tCa>tTa |
| A | c.3088G>A    | c.(3088-3090)Gaa>Aaa |
| T | c.3862C>T    | c.(3862-3864)Ccc>Tcc |
| T | c.4473C>T    | c.(4471-4473)atC>atT |
| T |              |                      |
| A | c.6135C>T    | c.(6133-6135)ttC>ttT |



|   |            |                        |
|---|------------|------------------------|
| A | c.1010G>T  | c.(1009-1011)aGg>aTg   |
| T | c.1113G>A  | c.(1111-1113)tgG>tgA   |
| T | c.3619C>T  | c.(3619-3621)Ccc>Tcc   |
| T | c.1006C>T  | c.(1006-1008)Cca>Tca   |
| A | c.2788G>A  | c.(2788-2790)Gtt>Att   |
| T | c.1257C>T  | c.(1255-1257)ctC>ctT   |
| T | c.1408C>T  | c.(1408-1410)Cgt>Tgt   |
| T | c.1302G>A  | c.(1300-1302)ggG>ggA   |
| A | c.4G>T     | c.(4-6)Gga>Tga         |
| T | c.1785C>T  | c.(1783-1785)gtC>gtT   |
| T | c.1833C>T  | c.(1831-1833)gcC>gcT   |
| A | c.2540G>A  | c.(2539-2541)gGa>gAa   |
| T |            |                        |
| T |            |                        |
| C | c.976A>G   | c.(976-978)Atg>Gtg     |
| A | c.1477C>T  | c.(1477-1479)Cgg>Tgg   |
| T |            |                        |
| T | c.663C>T   | c.(661-663)atC>atT     |
| T | c.87C>T    | c.(85-87)ctC>ctT       |
| A | c.1618C>T  | c.(1618-1620)Ccc>Tcc   |
| A | c.1513G>A  | c.(1513-1515)Gac>Aac   |
| A |            |                        |
| A |            |                        |
| T | c.10336G>A | c.(10336-10338)Gga>Aga |
| A | c.1295C>T  | c.(1294-1296)cCt>cTt   |
| A | c.1353C>T  | c.(1351-1353)ctC>ctT   |
| A | c.1000G>A  | c.(1000-1002)Gaa>Aaa   |
| T | c.198C>T   | c.(196-198)ttC>ttT     |
| A | c.1803C>T  | c.(1801-1803)ttC>ttT   |
| A | c.566G>T   | c.(565-567)tGc>tTc     |
| A | c.1442C>T  | c.(1441-1443)cCc>cTc   |
| T | c.1922C>T  | c.(1921-1923)tCa>tTa   |
| A | c.85G>A    | c.(85-87)Gga>Aga       |
| T | c.11010C>T | c.(11008-11010)acC>acT |
| T |            |                        |
| T | c.4705G>A  | c.(4705-4707)Gat>Aat   |
| T | c.345C>T   | c.(343-345)ttC>ttT     |
| A |            |                        |
| T |            |                        |
| T |            |                        |
| A | c.4073C>T  | c.(4072-4074)cCt>cTt   |
| T | c.877C>T   | c.(877-879)Cag>Tag     |
| A | c.830A>T   | c.(829-831)tAt>tTt     |

|   |              |                      |
|---|--------------|----------------------|
| A | c.79G>A      | c.(79-81)Gga>Aga     |
| T | c.5656G>A    | c.(5656-5658)Gaa>Aaa |
| T | c.2168T>A    | c.(2167-2169)cTt>cAt |
| A | c.486_splice | c.e4+1               |
| T | c.3179G>A    | c.(3178-3180)cGa>cAa |
| A | c.106G>A     | c.(106-108)Gag>Aag   |
| T | c.3918C>T    | c.(3916-3918)ttC>ttT |
| T | c.1016C>T    | c.(1015-1017)cCc>cTc |
| T | c.600G>A     | c.(598-600)gtG>gtA   |
| A | c.2009C>T    | c.(2008-2010)cCg>cTg |
| T | c.2589G>T    | c.(2587-2589)ttG>ttT |
| T | c.834G>A     | c.(832-834)tgG>tgA   |
| T | c.1665G>A    | c.(1663-1665)gaG>gaA |
| A | c.311C>A     | c.(310-312)tCc>tAc   |
| A | c.699C>T     | c.(697-699)ttC>ttT   |
| A | c.270C>T     | c.(268-270)tcC>tcT   |
| A | c.5977G>A    | c.(5977-5979)Gga>Aga |
| G | c.443C>G     | c.(442-444)cCc>cGc   |
| T |              |                      |
| T | c.1845C>T    | c.(1843-1845)ttC>ttT |
| C |              |                      |
| T | c.2206C>T    | c.(2206-2208)Ccg>Tcg |
| A | c.1619C>T    | c.(1618-1620)cCg>cTg |
| T | c.3206G>A    |                      |
| T | c.87_splice  | c.e2-1               |
| T | c.523G>A     | c.(523-525)Gac>Aac   |
| T | c.205C>T     | c.(205-207)Ccc>Tcc   |
| A |              |                      |
| T | c.988C>T     |                      |
| A | c.808_splice | c.e7+1               |
| A | c.497C>T     | c.(496-498)cCc>cTc   |
| A | c.1255C>T    | c.(1255-1257)Cca>Tca |
| T | c.1163C>T    | c.(1162-1164)gCc>gTc |
| T | c.970G>A     | c.(970-972)Ggc>Agc   |
| T | c.475G>A     | c.(475-477)Gaa>Aaa   |
| A | c.885C>T     | c.(883-885)tcC>tcT   |
| A | c.399C>T     | c.(397-399)ctC>ctT   |
| T | c.1102G>A    | c.(1102-1104)Gag>Aag |
| T | c.3765C>T    | c.(3763-3765)acC>acT |
| T | c.230C>T     | c.(229-231)cCc>cTc   |
| T |              |                      |
| A | c.1743G>A    | c.(1741-1743)atG>atA |
| T | c.754G>A     | c.(754-756)Gaa>Aaa   |

|   |               |                      |
|---|---------------|----------------------|
| A | c.2381G>A     | c.(2380-2382)gGg>gAg |
| T | c.739G>A      | c.(739-741)Gac>Aac   |
| T | c.1964G>A     | c.(1963-1965)gGa>gAa |
| A | c.1306G>A     | c.(1306-1308)Ggc>Agc |
| A | c.876G>A      | c.(874-876)atG>atA   |
| A | c.190C>T      | c.(190-192)Ccc>Tcc   |
| T | c.3G>A        | c.(1-3)atG>atA       |
| A | c.2456G>A     | c.(2455-2457)aGg>aAg |
| A | c.1086G>A     | c.(1084-1086)ccG>ccA |
| A | c.1263C>T     | c.(1261-1263)ttC>ttT |
| A |               |                      |
| C | c.431A>G      | c.(430-432)cAa>cGa   |
| T | c.1857G>A     | c.(1855-1857)ctG>ctA |
| A | c.2016C>T     | c.(2014-2016)ccC>ccT |
| T | c.1511C>T     | c.(1510-1512)tCg>tTg |
| T |               |                      |
| T | c.2816C>T     | c.(2815-2817)tCt>tTt |
| A | c.183A>T      | c.(181-183)caA>caT   |
| T | c.2351G>A     | c.(2350-2352)gGa>gAa |
| T | c.4741G>A     | c.(4741-4743)Gag>Aag |
| A | c.196C>T      | c.(196-198)Cga>Tga   |
| A | c.707G>A      | c.(706-708)aGg>aAg   |
| T | c.54G>T       | c.(52-54)ttG>ttT     |
| T | c.1551C>T     | c.(1549-1551)gcC>gcT |
| T | c.1610_splice | c.e13-1              |
| A | c.1565C>T     | c.(1564-1566)cCa>cTa |
| A | c.489C>T      | c.(487-489)ttC>ttT   |
| A | c.96G>A       | c.(94-96)gaG>gaA     |
| T | c.663C>T      | c.(661-663)acC>acT   |
| T | c.3418C>T     | c.(3418-3420)Cac>Tac |
| T | c.428C>T      | c.(427-429)cCc>cTc   |
| T | c.587C>T      | c.(586-588)aCc>aTc   |
| A |               |                      |
| T | c.4061_splice | c.e33+1              |
| T | c.1880C>T     | c.(1879-1881)gCc>gTc |
| T | c.474G>A      | c.(472-474)agG>agA   |
| A | c.56G>A       | c.(55-57)aGc>aAc     |
| T | c.942C>T      | c.(940-942)ttC>ttT   |
| T | c.667C>T      | c.(667-669)Cat>Tat   |
| C |               |                      |
| A |               |                      |
| A | c.1054C>T     | c.(1054-1056)Cga>Tga |
| T | c.2599C>T     | c.(2599-2601)Cgt>Tgt |

|   |               |                        |
|---|---------------|------------------------|
| A | c.17876C>T    | c.(17875-17877)tCc>tTc |
| T | c.467C>T      | c.(466-468)gCt>gTt     |
| T |               |                        |
| A | c.1186G>A     | c.(1186-1188)Gag>Aag   |
| T | c.1139G>A     | c.(1138-1140)gGg>gAg   |
| A | c.2294C>T     | c.(2293-2295)tCt>tTt   |
| A | c.714C>T      | c.(712-714)atC>atT     |
| A | c.1791C>T     | c.(1789-1791)ttC>ttT   |
| A | c.1299C>T     | c.(1297-1299)atC>atT   |
| T | c.3755C>T     | c.(3754-3756)tCc>tTc   |
| T | c.1803C>T     | c.(1801-1803)acC>acT   |
| A | c.510G>A      | c.(508-510)caG>caA     |
| T | c.508C>T      | c.(508-510)Cat>Tat     |
| A |               |                        |
| A | c.3658G>A     | c.(3658-3660)Ggg>Agg   |
| T | c.932G>A      | c.(931-933)aGc>aAc     |
| A | c.854C>A      | c.(853-855)tCg>tAg     |
| T | c.1346G>A     | c.(1345-1347)gGa>gAa   |
| T | c.1779G>A     | c.(1777-1779)tgG>tgA   |
| A | c.613G>A      | c.(613-615)Gtg>Atg     |
| T | c.1409C>T     | c.(1408-1410)tCc>tTc   |
| T | c.1109C>T     | c.(1108-1110)tCg>tTg   |
| T | c.1707C>T     | c.(1705-1707)ttC>ttT   |
| T | c.126C>T      | c.(124-126)aaC>aaT     |
| T | c.1347C>T     | c.(1345-1347)acC>acT   |
| T | c.1444_splice | c.e12+1                |
| A | c.1149C>T     | c.(1147-1149)ttC>ttT   |
| A | c.464G>A      | c.(463-465)gGa>gAa     |
| T | c.1950C>T     | c.(1948-1950)tcC>tcT   |
| G | c.573T>C      | c.(571-573)ggT>ggC     |
| A | c.1997C>T     | c.(1996-1998)tCt>tTt   |
| T | c.1218C>T     | c.(1216-1218)ttC>ttT   |
| A | c.1563G>A     | c.(1561-1563)gcG>gcA   |
| T | c.65365G>A    | c.(65365-65367)Ggg>Agg |
| A | c.7657C>T     | c.(7657-7659)Caa>Taa   |
| G | c.782A>G      | c.(781-783)aAc>aGc     |
| A | c.8164C>T     | c.(8164-8166)Ccc>Tcc   |
| A |               |                        |
| A | c.1125G>A     | c.(1123-1125)gtG>gtA   |
| T | c.144C>T      | c.(142-144)aaC>aaT     |
| T | c.3754C>T     | c.(3754-3756)Ccc>Tcc   |
| T | c.1123C>T     | c.(1123-1125)Ccg>Tcg   |
| A | c.1184C>T     | c.(1183-1185)cCa>cTa   |

|   |              |                        |
|---|--------------|------------------------|
| T | c.688_splice | c.e7+1                 |
| T | c.2364C>T    | c.(2362-2364)atC>atT   |
| A | c.999C>T     | c.(997-999)atC>atT     |
| A |              |                        |
| A | c.2506C>T    | c.(2506-2508)Cat>Tat   |
| A | c.66C>T      | c.(64-66)gaC>gaT       |
| T | c.738C>T     | c.(736-738)ttC>ttT     |
| A | c.3817G>A    | c.(3817-3819)Gaa>Aaa   |
| A | c.3205C>T    | c.(3205-3207)Ccc>Tcc   |
| A |              |                        |
| A | c.1630C>T    | c.(1630-1632)Cac>Tac   |
| T | c.1662C>T    | c.(1660-1662)atC>atT   |
| A | c.2431G>A    | c.(2431-2433)Gat>Aat   |
| T | c.534C>T     | c.(532-534)ttC>ttT     |
| A | c.1274G>A    | c.(1273-1275)gGg>gAg   |
| A | c.3213G>A    | c.(3211-3213)acG>acA   |
| A | c.2577G>A    | c.(2575-2577)acG>acA   |
| A | c.213C>T     | c.(211-213)ttC>ttT     |
| T | c.1681C>T    | c.(1681-1683)Ctt>Ttt   |
| A | c.3215G>A    | c.(3214-3216)aGa>aAa   |
| A | c.1600C>T    | c.(1600-1602)Cgt>Tgt   |
| A | c.1158C>T    | c.(1156-1158)ctC>ctT   |
| A |              |                        |
| T | c.796G>A     | c.(796-798)Gag>Aag     |
| A | c.1085G>A    | c.(1084-1086)gGg>gAg   |
| T |              |                        |
| T | c.969C>T     | c.(967-969)atC>atT     |
| T | c.192C>T     | c.(190-192)gtC>gtT     |
| A | c.1084G>A    | c.(1084-1086)Gaa>Aaa   |
| A | c.680C>T     | c.(679-681)cCc>cTc     |
| A | c.610G>A     | c.(610-612)Gaa>Aaa     |
| T | c.56G>A      | c.(55-57)gGg>gAg       |
| T | c.11437C>T   | c.(11437-11439)Ccc>Tcc |
| T | c.10C>T      | c.(10-12)Ccc>Tcc       |
| T | c.190G>A     | c.(190-192)Gat>Aat     |
| A |              |                        |
| C | c.517T>C     | c.(517-519)Tat>Cat     |
| A | c.1748T>A    | c.(1747-1749)aTt>aAt   |
| T | c.1797C>T    | c.(1795-1797)tcC>tcT   |
| T | c.941C>T     |                        |
| T | c.1154C>T    | c.(1153-1155)tCc>tTc   |
| T | c.3881G>A    | c.(3880-3882)aGa>aAa   |
| A | c.4420C>A    | c.(4420-4422)Cat>Aat   |

|   |                |                      |
|---|----------------|----------------------|
| T | c.361C>T       | c.(361-363)Cgc>Tgc   |
| A | c.604C>T       | c.(604-606)Cct>Tct   |
| C | c.3267G>C      | c.(3265-3267)aaG>aaC |
| C | c.7474G>C      | c.(7474-7476)Gac>Cac |
| A |                |                      |
| A | c.3654C>T      | c.(3652-3654)atC>atT |
| T | c.3939G>A      | c.(3937-3939)ctG>ctA |
| T | c.1184G>A      | c.(1183-1185)gGc>gAc |
| T | c.171C>T       | c.(169-171)ccC>ccT   |
| G | c.171T>C       | c.(169-171)agT>agC   |
| T | c.1252G>A      | c.(1252-1254)Gga>Aga |
| T | c.9794G>A      | c.(9793-9795)gGa>gAa |
| G | c.2322A>G      | c.(2320-2322)ctA>ctG |
| A | c.1491C>T      | c.(1489-1491)gcC>gcT |
| A | c.5383C>T      | c.(5383-5385)Cct>Tct |
| A | c.2395C>T      | c.(2395-2397)Ccc>Tcc |
| T | c.569C>T       | c.(568-570)tCa>tTa   |
| T | c.1751C>T      | c.(1750-1752)cCc>cTc |
| T | c.870C>T       | c.(868-870)gtC>gtT   |
| T | c.631C>T       | c.(631-633)Cgg>Tgg   |
| G | c.3504G>C      | c.(3502-3504)tgG>tgC |
| T | c.1042G>A      | c.(1042-1044)Gat>Aat |
| A | c.145C>T       | c.(145-147)Ctt>Ttt   |
| T | c.150C>T       | c.(148-150)ttC>ttT   |
| T | c.148C>T       | c.(148-150)Cca>Tca   |
| A | c.210C>T       | c.(208-210)ttC>ttT   |
| A | c.1221T>A      | c.(1219-1221)ttT>ttA |
| A | c.1618C>T      | c.(1618-1620)Ccg>Tcg |
| A | c.1846G>A      | c.(1846-1848)Gag>Aag |
| A | c.1052C>T      | c.(1051-1053)tCc>tTc |
| A |                |                      |
| A | c.801C>T       | c.(799-801)tcC>tcT   |
| T | c.1080C>T      | c.(1078-1080)tcC>tcT |
| T | c.1699G>A      | c.(1699-1701)Gaa>Aaa |
| T | c.3785C>T      | c.(3784-3786)cCg>cTg |
| T |                |                      |
| A | c.1185C>T      | c.(1183-1185)ttC>ttT |
| T | c.-82_splice   | c.e2-1               |
| A | c.1190A>T      | c.(1189-1191)aAc>aTc |
| A |                |                      |
| A | c.1658C>T      | c.(1657-1659)tCc>tTc |
| T | c.42978_splice | c.e2452+1            |
| G | c.1593T>G      | c.(1591-1593)ccT>ccG |

|   |                |                        |
|---|----------------|------------------------|
| T | c.39G>A        | c.(37-39)gaG>gaA       |
| A | c.333G>A       | c.(331-333)tgG>tgA     |
| T | c.375G>A       | c.(373-375)cgG>cgA     |
| T | c.1128G>A      | c.(1126-1128)atG>atA   |
| A | c.2787G>A      | c.(2785-2787)aaG>aaA   |
| T | c.697C>T       | c.(697-699)Ctg>Ttg     |
| C | c.2390T>G      | c.(2389-2391)gTa>gGa   |
| A | c.1238C>T      | c.(1237-1239)tCc>tTc   |
| T | c.546G>A       | c.(544-546)caG>caA     |
| T | c.1136G>A      | c.(1135-1137)gGc>gAc   |
| T | c.920G>A       | c.(919-921)aGa>aAa     |
| T | c.1524C>T      | c.(1522-1524)ttC>ttT   |
| T | c.1245G>A      | c.(1243-1245)tcG>tcA   |
| A |                |                        |
| A | c.754G>A       | c.(754-756)Gac>Aac     |
| T | c.467C>T       | c.(466-468)cCt>cTt     |
| T | c.1040C>T      | c.(1039-1041)cCt>cTt   |
| T |                |                        |
| G | c.3246A>G      | c.(3244-3246)gtA>gtG   |
| A | c.1257G>A      | c.(1255-1257)ctG>ctA   |
| A | c.4164C>T      | c.(4162-4164)atC>atT   |
| T | c.16678_splice | c.e584+1               |
| A |                |                        |
| T | c.1323A>T      | c.(1321-1323)aaA>aaT   |
| G |                |                        |
| T | c.5042C>T      | c.(5041-5043)cCc>cTc   |
| A | c.1759G>A      | c.(1759-1761)Gga>Aga   |
| T | c.100G>A       | c.(100-102)Gag>Aag     |
| T | c.435G>A       | c.(433-435)ggG>ggA     |
| T |                |                        |
| T | c.2691C>T      | c.(2689-2691)atC>atT   |
| A | c.2876C>T      | c.(2875-2877)gCc>gTc   |
| A |                |                        |
| A | c.30299C>T     | c.(30298-30300)tCa>tTa |
| T | c.840C>T       | c.(838-840)acC>acT     |
| T |                |                        |
| T | c.1750_splice  | c.e20-1                |
| A | c.2011G>A      | c.(2011-2013)Ggt>Agt   |
| T | c.772_splice   | c.e10-1                |
| A |                |                        |
| T | c.1833G>A      | c.(1831-1833)tcG>tcA   |
| A | c.1617G>A      | c.(1615-1617)ctG>ctA   |
| A | c.1885G>A      | c.(1885-1887)Gat>Aat   |

|   |           |                      |
|---|-----------|----------------------|
| T | c.537G>A  | c.(535-537)ttG>ttA   |
| A | c.550G>A  | c.(550-552)Gag>Aag   |
| A | c.478C>T  | c.(478-480)Ctg>Ttg   |
| A |           |                      |
| G | c.400A>G  | c.(400-402)Aaa>Gaa   |
| T | c.500G>A  | c.(499-501)aGg>aAg   |
| T | c.849C>T  | c.(847-849)tcC>tcT   |
| A | c.925C>T  | c.(925-927)Ccg>Tcg   |
| A | c.610G>A  | c.(610-612)Gga>Aga   |
| A | c.1561C>T | c.(1561-1563)Cac>Tac |
| T | c.6541G>A | c.(6541-6543)Gag>Aag |
| T | c.610C>T  | c.(610-612)Ccg>Tcg   |
| T | c.1368C>T | c.(1366-1368)gtC>gtT |
| T | c.970C>T  | c.(970-972)Cct>Tct   |
| T | c.1092C>T | c.(1090-1092)atC>atT |
| A | c.864C>T  | c.(862-864)ttC>ttT   |
| T | c.3990G>A | c.(3988-3990)ccG>ccA |
| A | c.765G>A  | c.(763-765)gtG>gtA   |
| A | c.666C>T  | c.(664-666)ctC>ctT   |
| T | c.448G>A  | c.(448-450)Gac>Aac   |
| T |           |                      |
| T | c.427C>T  | c.(427-429)Ctc>Ttc   |
| A | c.1783C>T | c.(1783-1785)Cat>Tat |
| T | c.7114G>A | c.(7114-7116)Gac>Aac |
| A | c.190C>T  | c.(190-192)Cat>Tat   |
| T | c.620G>A  | c.(619-621)gGa>gAa   |
| T |           |                      |
| T | c.1257G>A | c.(1255-1257)gtG>gtA |
| T | c.554C>T  | c.(553-555)tCc>tTc   |
| T | c.1403C>T | c.(1402-1404)tCa>tTa |
| A | c.2263G>A | c.(2263-2265)Gaa>Aaa |
| G | c.1510T>C | c.(1510-1512)Ttg>Ctg |
| T |           |                      |
| A | c.1206C>T | c.(1204-1206)gaC>gaT |
| A | c.642C>T  | c.(640-642)ttC>ttT   |
| A | c.3925C>T | c.(3925-3927)Cgt>Tgt |
| A | c.1688C>T | c.(1687-1689)tCc>tTc |
| A | c.3938C>T | c.(3937-3939)tCa>tTa |
| A | c.1652G>A | c.(1651-1653)tGg>tAg |
| T | c.1060G>A | c.(1060-1062)Gaa>Aaa |
| T | c.337C>T  | c.(337-339)Cct>Tct   |
| A | c.747C>T  | c.(745-747)tcC>tcT   |
| A | c.2929G>A | c.(2929-2931)Gga>Aga |



|   |           |                      |
|---|-----------|----------------------|
| A | c.1035G>A | c.(1033-1035)gtG>gtA |
| T | c.2658G>A | c.(2656-2658)atG>atA |
| T | c.202C>T  | c.(202-204)Cct>Tct   |
| T |           |                      |
| G | c.496G>C  | c.(496-498)Ggg>Cgg   |
| A | c.1360C>T | c.(1360-1362)Cag>Tag |
| T | c.518C>T  | c.(517-519)cCc>cTc   |
| G | c.733G>C  | c.(733-735)Gtg>Ctg   |
| T | c.1858C>T |                      |
| A | c.502G>A  | c.(502-504)Gag>Aag   |
| A | c.993G>A  | c.(991-993)aaG>aaA   |
| A | c.4833G>A | c.(4831-4833)agG>agA |
| A | c.835C>T  | c.(835-837)Ccg>Tcg   |
| T | c.2067C>T | c.(2065-2067)gtC>gtT |
| A | c.717C>T  | c.(715-717)ttC>ttT   |
| A | c.1817G>A |                      |
| A | c.204C>A  | c.(202-204)acC>acA   |
| A |           |                      |
| A | c.4294G>A | c.(4294-4296)Gac>Aac |
| T | c.382G>A  | c.(382-384)Ggt>Agt   |
| T | c.1101G>A | c.(1099-1101)ttG>ttA |
| A | c.384C>T  | c.(382-384)gcC>gcT   |
| G | c.1292A>G | c.(1291-1293)aAg>aGg |
| T | c.830G>A  | c.(829-831)cGa>cAa   |
| C | c.272T>C  | c.(271-273)gTg>gCg   |
| T |           |                      |
| A | c.233G>A  | c.(232-234)aGg>aAg   |
| T | c.844C>T  | c.(844-846)Cgt>Tgt   |
| C | c.1780T>C | c.(1780-1782)Ttg>Ctg |
| T | c.61C>T   | c.(61-63)Cct>Tct     |
| A |           |                      |
| A | c.111C>T  | c.(109-111)ttC>ttT   |
| T | c.44G>A   | c.(43-45)tGg>tAg     |
| A | c.631C>T  | c.(631-633)Cgt>Tgt   |
| A | c.238G>A  | c.(238-240)Gaa>Aaa   |
| T | c.30G>A   | c.(28-30)cgG>cgA     |
| A | c.488C>T  | c.(487-489)tCc>tTc   |
| A | c.793C>T  | c.(793-795)Cct>Tct   |
| T | c.1320C>T | c.(1318-1320)atC>atT |
| A | c.4345C>T | c.(4345-4347)Ccc>Tcc |
| A | c.800C>T  | c.(799-801)gCt>gTt   |
| T | c.1820C>T | c.(1819-1821)cCa>cTa |
| T |           |                      |

|   |              |                        |
|---|--------------|------------------------|
| A | c.448C>T     | c.(448-450)Cgc>Tgc     |
| A | c.1741G>A    | c.(1741-1743)Gag>Aag   |
| T | c.1430C>T    | c.(1429-1431)aCc>aTc   |
| T | c.2081C>T    | c.(2080-2082)tCt>tTt   |
| A | c.306G>A     | c.(304-306)tgG>tgA     |
| T |              |                        |
| T | c.1131G>A    | c.(1129-1131)caG>caA   |
| A | c.150G>A     | c.(148-150)agG>agA     |
| T | c.2679C>T    | c.(2677-2679)ttC>ttT   |
| A |              |                        |
| T | c.1813C>T    | c.(1813-1815)Cca>Tca   |
| A | c.84C>T      | c.(82-84)atC>atT       |
| A | c.349G>A     | c.(349-351)Gaa>Aaa     |
| T | c.2086C>T    | c.(2086-2088)Cca>Tca   |
| A | c.2631C>T    | c.(2629-2631)tcC>tcT   |
| A | c.3069C>T    | c.(3067-3069)ttC>ttT   |
| T | c.841C>A     | c.(841-843)Cct>Act     |
| A | c.150C>T     | c.(148-150)gaC>gaT     |
| A |              |                        |
| A | c.939C>T     | c.(937-939)ttC>ttT     |
| A | c.1106C>T    | c.(1105-1107)tCa>tTa   |
| A | c.12972C>T   | c.(12970-12972)taC>taT |
| T | c.164G>A     | c.(163-165)gGa>gAa     |
| T | c.3425C>T    | c.(3424-3426)tCt>tTt   |
| A | c.1061C>T    | c.(1060-1062)cCt>cTt   |
| A | c.3068C>T    | c.(3067-3069)cCc>cTc   |
| T | c.1790G>A    | c.(1789-1791)gGg>gAg   |
| A | c.561C>T     | c.(559-561)atC>atT     |
| T | c.33C>T      | c.(31-33)tcC>tcT       |
| A | c.221C>T     | c.(220-222)aCc>aTc     |
| T | c.427G>A     | c.(427-429)Gat>Aat     |
| A | c.1519C>T    | c.(1519-1521)Cct>Tct   |
| A | c.4065C>T    | c.(4063-4065)gcC>gcT   |
| A | c.7828G>A    | c.(7828-7830)Gaa>Aaa   |
| T | c.5214C>T    | c.(5212-5214)gcC>gcT   |
| A | c.791G>A     | c.(790-792)cGa>cAa     |
| A | c.298G>A     | c.(298-300)Gat>Aat     |
| A | c.318G>A     | c.(316-318)caG>caA     |
| C |              |                        |
| T | c.2256G>A    | c.(2254-2256)ggG>ggA   |
| T | c.12117C>T   | c.(12115-12117)atC>atT |
| T | c.797_splice | c.e6-1                 |
| A | c.3294C>T    | c.(3292-3294)tcC>tcT   |

|   |              |                        |
|---|--------------|------------------------|
| G | c.576T>C     | c.(574-576)gaT>gaC     |
| A | c.860C>T     | c.(859-861)tCc>tTc     |
| T | c.1542G>A    | c.(1540-1542)aaG>aaA   |
| A | c.385G>A     | c.(385-387)Gga>Aga     |
| A | c.3163C>T    | c.(3163-3165)Cca>Tca   |
| T | c.234C>T     | c.(232-234)ctC>ctT     |
| T | c.1941A>T    | c.(1939-1941)ggA>ggT   |
| T | c.7177G>A    | c.(7177-7179)Gaa>Aaa   |
| A | c.22805C>T   | c.(22804-22806)aCc>aTc |
| A | c.3052A>T    | c.(3052-3054)Agc>Tgc   |
| C |              |                        |
| T | c.292C>T     | c.(292-294)Cgt>Tgt     |
| T | c.286C>T     | c.(286-288)Cga>Tga     |
| T | c.1072C>T    | c.(1072-1074)Cat>Tat   |
| A | c.1933C>T    | c.(1933-1935)Cag>Tag   |
| A | c.4317C>T    | c.(4315-4317)ctC>ctT   |
| A | c.688C>T     | c.(688-690)Cct>Tct     |
| A | c.1071C>T    | c.(1069-1071)gtC>gtT   |
| T | c.506C>T     | c.(505-507)gCc>gTc     |
| A | c.909G>A     | c.(907-909)gtG>gtA     |
| C |              |                        |
| T | c.62C>T      | c.(61-63)tCt>tTt       |
| A | c.1360C>T    | c.(1360-1362)Ctt>Ttt   |
| A | c.2135G>A    | c.(2134-2136)cGg>cAg   |
| T | c.636_splice | c.e7+1                 |
| T |              |                        |
| A |              |                        |
| A |              |                        |
| A | c.2216C>T    | c.(2215-2217)tCg>tTg   |
| A | c.6107C>T    | c.(6106-6108)tCt>tTt   |
| T | c.118C>T     | c.(118-120)Ccc>Tcc     |
| T | c.1220C>T    | c.(1219-1221)tCg>tTg   |
| T | c.44G>A      | c.(43-45)gGa>gAa       |
| A | c.56C>T      | c.(55-57)tCt>tTt       |
| A | c.1410G>A    | c.(1408-1410)ctG>ctA   |
| G | c.659T>C     | c.(658-660)cTg>cCg     |
| T | c.112C>T     | c.(112-114)Ccg>Tcg     |
| A | c.1770C>T    | c.(1768-1770)ttC>ttT   |
| T | c.921G>A     | c.(919-921)caG>caA     |
| T | c.605G>A     | c.(604-606)gGc>gAc     |
| A | c.3184G>A    | c.(3184-3186)Gag>Aag   |
| T | c.743G>A     | c.(742-744)tGg>tAg     |
| T | c.1038C>T    | c.(1036-1038)ttC>ttT   |

|   |            |                        |
|---|------------|------------------------|
| A | c.4755G>A  | c.(4753-4755)ccG>ccA   |
| A | c.2268G>A  | c.(2266-2268)agG>agA   |
| T | c.2088C>T  | c.(2086-2088)tcC>tcT   |
| T | c.8230C>T  | c.(8230-8232)Cga>Tga   |
| A | c.635C>T   | c.(634-636)tCa>tTa     |
| A | c.2901G>A  | c.(2899-2901)ggG>ggA   |
| A | c.663C>T   | c.(661-663)atC>atT     |
| A |            |                        |
| G | c.7957A>G  | c.(7957-7959)Aat>Gat   |
| T | c.183G>A   | c.(181-183)gtG>gtA     |
| C | c.375T>G   | c.(373-375)gaT>gaG     |
| A | c.87G>A    | c.(85-87)tgG>tgA       |
| T | c.103C>T   | c.(103-105)Ccc>Tcc     |
| T | c.6906G>A  | c.(6904-6906)ggG>ggA   |
| T | c.607C>T   | c.(607-609)Ctg>Ttg     |
| C | c.817A>G   | c.(817-819)Act>Gct     |
| A | c.717G>T   | c.(715-717)gtG>gtT     |
| T |            |                        |
| A | c.595G>A   | c.(595-597)Gag>Aag     |
| A | c.369C>T   | c.(367-369)ttC>ttT     |
| T | c.1740C>T  | c.(1738-1740)ggC>ggT   |
| A | c.3925G>A  | c.(3925-3927)Gag>Aag   |
| A | c.452C>T   | c.(451-453)tCc>tTc     |
| A | c.2556C>T  | c.(2554-2556)atC>atT   |
| A | c.277G>A   | c.(277-279)Gaa>Aaa     |
| A |            |                        |
| T |            |                        |
| A | c.2061C>T  | c.(2059-2061)acC>acT   |
| T |            |                        |
| T |            |                        |
| T | c.1060C>A  | c.(1060-1062)Cct>Act   |
| T | c.1795C>T  | c.(1795-1797)Cac>Tac   |
| T | c.1851G>A  | c.(1849-1851)ctG>ctA   |
| T | c.2618C>T  | c.(2617-2619)tCc>tTc   |
| T | c.19894C>T | c.(19894-19896)Ccc>Tcc |
| T | c.148C>T   | c.(148-150)Cct>Tct     |
| T | c.1005C>T  | c.(1003-1005)tcC>tcT   |
| T | c.174C>T   | c.(172-174)atC>atT     |
| A | c.1117C>T  |                        |
| T | c.701C>T   | c.(700-702)tCc>tTc     |
| T | c.455G>A   | c.(454-456)gGc>gAc     |
| T | c.347G>A   | c.(346-348)gGa>gAa     |
| A | c.1188G>A  | c.(1186-1188)caG>caA   |

|   |              |                        |
|---|--------------|------------------------|
| A | c.3524G>A    | c.(3523-3525)gGa>gAa   |
| A | c.1891C>T    | c.(1891-1893)Cct>Tct   |
| A | c.1039C>T    | c.(1039-1041)Ctg>Ttg   |
| T | c.67C>T      | c.(67-69)Ccc>Tcc       |
| T |              |                        |
| T | c.420G>A     | c.(418-420)tgG>tgA     |
| A | c.503G>A     | c.(502-504)cGg>cAg     |
| T | c.191C>T     | c.(190-192)cCc>cTc     |
| A |              |                        |
| T | c.477G>A     | c.(475-477)ggG>ggA     |
| T | c.267G>A     | c.(265-267)ggG>ggA     |
| T | c.1852G>A    | c.(1852-1854)Gga>Aga   |
| T | c.950G>A     | c.(949-951)cGa>cAa     |
| A | c.430_splice | c.e4+1                 |
| A | c.681G>A     | c.(679-681)tgG>tgA     |
| T | c.1461G>A    | c.(1459-1461)atG>atA   |
| T | c.6534G>A    | c.(6532-6534)atG>atA   |
| A | c.235G>A     | c.(235-237)Ggt>Agt     |
| T |              |                        |
| T | c.1068G>A    |                        |
| T | c.2155G>A    | c.(2155-2157)Gaa>Aaa   |
| A | c.23630C>T   | c.(23629-23631)tCc>tTc |
| A | c.28_splice  | c.e3-1                 |
| T | c.205G>A     | c.(205-207)Gag>Aag     |
| T | c.558C>T     | c.(556-558)atC>atT     |
| T | c.162C>T     | c.(160-162)ttC>ttT     |
| A | c.12378C>T   | c.(12376-12378)ttC>ttT |
| T | c.5704G>A    | c.(5704-5706)Gga>Aga   |
| A | c.2426G>A    | c.(2425-2427)aGa>aAa   |
| T | c.1774G>A    | c.(1774-1776)Gaa>Aaa   |
| T | c.2483G>A    | c.(2482-2484)gGa>gAa   |
| T | c.5780G>A    | c.(5779-5781)aGa>aAa   |
| A | c.2846C>T    | c.(2845-2847)cCt>cTt   |
| T | c.2474C>T    | c.(2473-2475)tCc>tTc   |
| T | c.801C>T     | c.(799-801)atC>atT     |
| A | c.1547C>T    | c.(1546-1548)cCa>cTa   |
| T | c.1492G>A    | c.(1492-1494)Ggc>Agc   |
| T | c.87_splice  | c.e2-1                 |
| T | c.1268C>T    | c.(1267-1269)tCc>tTc   |
| A |              |                        |
| A | c.954C>T     | c.(952-954)ttC>ttT     |
| T |              |                        |
| T |              |                        |

|   |              |                        |
|---|--------------|------------------------|
| T | c.329G>A     | c.(328-330)gGa>gAa     |
| A | c.1213G>A    | c.(1213-1215)Gat>Aat   |
| A | c.3469C>T    | c.(3469-3471)Cag>Tag   |
| A | c.2283C>T    | c.(2281-2283)atC>atT   |
| T | c.590G>A     | c.(589-591)gGg>gAg     |
| A | c.934G>A     | c.(934-936)Gga>Aga     |
| T | c.2051C>T    | c.(2050-2052)aCa>aTa   |
| A | c.144C>T     | c.(142-144)atC>atT     |
| A | c.298C>T     | c.(298-300)Ctc>Ttc     |
| T | c.225C>T     | c.(223-225)tcC>tcT     |
| A | c.1929C>T    | c.(1927-1929)ggC>ggT   |
| T | c.726C>T     | c.(724-726)ttC>ttT     |
| A | c.5012G>A    |                        |
| T | c.581C>T     | c.(580-582)cCt>cTt     |
| T | c.2190C>T    | c.(2188-2190)ttC>ttT   |
| G | c.211T>C     | c.(211-213)Tct>Cct     |
| A | c.232G>A     | c.(232-234)Ggg>Agg     |
| A | c.1307G>A    | c.(1306-1308)aGg>aAg   |
| T | c.1498G>A    | c.(1498-1500)Gcc>Acc   |
| A | c.1139G>A    | c.(1138-1140)gGa>gAa   |
| A | c.201C>T     | c.(199-201)ccC>ccT     |
| T | c.54C>T      | c.(52-54)ttC>ttT       |
| G | c.859A>C     | c.(859-861)Ata>Cta     |
| T | c.1561C>T    | c.(1561-1563)Cct>Tct   |
| T | c.5079G>A    | c.(5077-5079)tgG>tgA   |
| T | c.1678G>A    | c.(1678-1680)Gag>Aag   |
| T | c.1492G>A    | c.(1492-1494)Gac>Aac   |
| T | c.2269G>A    | c.(2269-2271)Gcc>Acc   |
| A | c.2070C>T    | c.(2068-2070)ctC>ctT   |
| T | c.499C>T     | c.(499-501)Ctt>Ttt     |
| A | c.423C>T     | c.(421-423)ttC>ttT     |
| A | c.823_splice | c.e3-1                 |
| G | c.11767A>G   | c.(11767-11769)Aaa>Gaa |
| A | c.34C>T      | c.(34-36)Cag>Tag       |
| T | c.891C>T     | c.(889-891)atC>atT     |
| A | c.78C>T      | c.(76-78)atC>atT       |
| T | c.1389C>T    | c.(1387-1389)ttC>ttT   |
| A | c.670C>T     | c.(670-672)Ccc>Tcc     |
| A | c.3019C>T    | c.(3019-3021)Cgg>Tgg   |
| T | c.5449G>A    | c.(5449-5451)Gat>Aat   |
| T | c.2525G>A    | c.(2524-2526)cGa>cAa   |
| A |              |                        |
| A | c.1906C>T    | c.(1906-1908)Cat>Tat   |

|   |               |                        |
|---|---------------|------------------------|
| A | c.461G>A      | c.(460-462)aGt>aAt     |
| T |               |                        |
| A | c.357G>A      | c.(355-357)ctG>ctA     |
| A | c.434C>T      | c.(433-435)tCc>tTc     |
| A | c.1106C>T     | c.(1105-1107)tCc>tTc   |
| A | c.1338G>A     | c.(1336-1338)gaG>gaA   |
| T | c.982C>T      | c.(982-984)Ccc>Tcc     |
| A | c.15269C>T    | c.(15268-15270)cCt>cTt |
| A | c.1634G>A     | c.(1633-1635)cGa>cAa   |
| A | c.276C>T      | c.(274-276)atC>atT     |
| A | c.1701C>T     | c.(1699-1701)gcC>gcT   |
| A |               |                        |
| A | c.838C>T      | c.(838-840)Cag>Tag     |
| T | c.3418C>T     | c.(3418-3420)Cag>Tag   |
| T | c.3140C>T     | c.(3139-3141)cCa>cTa   |
| A |               |                        |
| T | c.2522C>T     | c.(2521-2523)tCa>tTa   |
| T | c.7258C>T     | c.(7258-7260)Cgt>Tgt   |
| A | c.1211_splice | c.e7-1                 |
| T | c.2926C>T     | c.(2926-2928)Cag>Tag   |
| T | c.507G>A      | c.(505-507)caG>caA     |
| A | c.2796C>T     | c.(2794-2796)gtC>gtT   |
| T |               |                        |
| A |               |                        |
| T | c.117G>A      | c.(115-117)ggG>ggA     |
| T | c.19426G>A    | c.(19426-19428)Gat>Aat |
| G |               |                        |
| T | c.4512C>T     |                        |
| A | c.751C>T      | c.(751-753)Cat>Tat     |
| A | c.988G>A      | c.(988-990)Gag>Aag     |
| T |               |                        |
| A | c.2500C>T     | c.(2500-2502)Cat>Tat   |
| A | c.1061C>T     | c.(1060-1062)tCc>tTc   |
| A | c.451C>T      | c.(451-453)Cat>Tat     |
| T | c.346C>T      | c.(346-348)Cgg>Tgg     |
| T |               |                        |
| T | c.5308G>A     | c.(5308-5310)Ggc>Agc   |
| C | c.1888_splice | c.e18-1                |
| T | c.133G>A      | c.(133-135)Gaa>Aaa     |
| A | c.1368G>A     | c.(1366-1368)agG>agA   |
| A | c.313C>T      | c.(313-315)Cag>Tag     |
| A | c.2353T>A     | c.(2353-2355)Ttc>Atc   |
| T | c.590C>T      | c.(589-591)aCc>aTc     |

|   |               |                        |
|---|---------------|------------------------|
| T | c.780C>T      | c.(778-780)gtC>gtT     |
| T | c.664C>T      | c.(664-666)Ccc>Tcc     |
| T | c.364G>A      | c.(364-366)Gac>Aac     |
| A | c.3G>A        | c.(1-3)atG>atA         |
| T | c.1068C>T     | c.(1066-1068)ggC>ggT   |
| T | c.282C>T      | c.(280-282)ttC>ttT     |
| A | c.2150C>T     | c.(2149-2151)cCt>cTt   |
| T | c.873C>T      | c.(871-873)gtC>gtT     |
| A | c.649G>A      | c.(649-651)Ggg>Agg     |
| T | c.1105C>T     | c.(1105-1107)Cga>Tga   |
| T | c.162C>T      | c.(160-162)tcC>tcT     |
| T | c.1564G>A     | c.(1564-1566)Ggc>Agc   |
| A |               |                        |
| A | c.3088C>T     | c.(3088-3090)Ctc>Ttc   |
| T | c.1273_splice | c.e9-1                 |
| T | c.910G>A      | c.(910-912)Gag>Aag     |
| T | c.922G>A      | c.(922-924)Gaa>Aaa     |
| A | c.2387C>T     | c.(2386-2388)tCc>tTc   |
| A | c.16841C>T    | c.(16840-16842)tCc>tTc |
| C | c.2050A>C     | c.(2050-2052)Aca>Cca   |
| C | c.2110_splice | c.e11+1                |
| T | c.324C>T      | c.(322-324)ttC>ttT     |
| A |               |                        |
| T | c.4036G>A     | c.(4036-4038)Gag>Aag   |
| A | c.1545C>T     | c.(1543-1545)atC>atT   |
| A | c.813C>T      | c.(811-813)ccC>ccT     |
| T | c.15804G>A    | c.(15802-15804)acG>acA |
| T | c.1711G>A     | c.(1711-1713)Gga>Aga   |
| T | c.1995C>T     | c.(1993-1995)ttC>ttT   |
| T | c.541C>T      | c.(541-543)Cgt>Tgt     |
| T | c.1467G>A     | c.(1465-1467)gtG>gtA   |
| T | c.1828G>A     | c.(1828-1830)Gag>Aag   |
| T | c.330C>T      | c.(328-330)ccC>ccT     |
| T | c.182C>T      | c.(181-183)tCg>tTg     |
| A | c.1347T>A     | c.(1345-1347)gcT>gcA   |
| A | c.651G>A      | c.(649-651)aaG>aaA     |
| A | c.2512C>T     | c.(2512-2514)Cat>Tat   |
| T | c.562C>T      | c.(562-564)Cgt>Tgt     |
| A | c.222C>T      | c.(220-222)atC>atT     |
| C | c.481T>C      | c.(481-483)Tct>Cct     |
| A | c.1477G>A     | c.(1477-1479)Gaa>Aaa   |
| G | c.25A>G       | c.(25-27)Aga>Gga       |
| T | c.4495C>T     | c.(4495-4497)Ctg>Ttg   |



|   |              |                      |
|---|--------------|----------------------|
| A | c.311C>T     | c.(310-312)cCt>cTt   |
| T | c.295C>T     | c.(295-297)Cca>Tca   |
| A | c.7C>T       | c.(7-9)Cag>Tag       |
| A | c.1651C>T    | c.(1651-1653)Cca>Tca |
| A | c.338C>T     | c.(337-339)cCc>cTc   |
| T | c.636_splice | c.e7+1               |
| A | c.364C>T     | c.(364-366)Ctc>Ttc   |
| A | c.2139G>A    | c.(2137-2139)atG>atA |
| A | c.1896G>A    | c.(1894-1896)atG>atA |
| A | c.1507C>T    | c.(1507-1509)Cag>Tag |
| A | c.8174C>T    | c.(8173-8175)cCc>cTc |
| A | c.3495C>T    | c.(3493-3495)ttC>ttT |
| A | c.322C>T     | c.(322-324)Cga>Tga   |
| T | c.754C>T     | c.(754-756)Cat>Tat   |
| T | c.1340C>T    | c.(1339-1341)cCg>cTg |
| A | c.2481G>A    | c.(2479-2481)caG>caA |
| T |              |                      |
| A |              |                      |
| A | c.501G>A     | c.(499-501)gtG>gtA   |
| A | c.1292G>A    | c.(1291-1293)aGg>aAg |
| T | c.1930G>A    | c.(1930-1932)Gaa>Aaa |
| T |              |                      |
| A | c.804C>T     | c.(802-804)acC>acT   |
| T | c.707C>T     | c.(706-708)gCt>gTt   |
| A | c.1483C>T    | c.(1483-1485)Cgc>Tgc |
| T | c.898A>T     | c.(898-900)Act>Tct   |
| T | c.2984G>A    | c.(2983-2985)aGc>aAc |
| A | c.41G>A      | c.(40-42)cGa>cAa     |
| T | c.582C>T     | c.(580-582)ccC>ccT   |
| T | c.4C>A       | c.(4-6)Cca>Aca       |
| T | c.1096C>T    | c.(1096-1098)Ccc>Tcc |
| T | c.1040C>T    | c.(1039-1041)tCc>tTc |
| A |              |                      |
| A | c.647C>T     | c.(646-648)tCt>tTt   |
| C |              |                      |
| A | c.684C>T     | c.(682-684)ttC>ttT   |
| T | c.278C>A     | c.(277-279)tCa>tAa   |
| T | c.4674C>T    | c.(4672-4674)gtC>gtT |
| T | c.1183G>A    | c.(1183-1185)Ggc>Agc |
| T | c.174C>T     | c.(172-174)gcC>gcT   |
| A | c.24G>A      | c.(22-24)caG>caA     |
| T | c.2280C>T    | c.(2278-2280)ttC>ttT |
| T | c.1143G>A    | c.(1141-1143)ctG>ctA |

|   |               |                        |
|---|---------------|------------------------|
| T | c.833C>T      | c.(832-834)cCt>cTt     |
| T | c.20996C>A    | c.(20995-20997)cCt>cAt |
| T | c.1742C>T     | c.(1741-1743)tCt>tTt   |
| A | c.433C>T      | c.(433-435)Cag>Tag     |
| A | c.897C>T      | c.(895-897)agC>agT     |
| T | c.8848C>T     | c.(8848-8850)Ccc>Tcc   |
| T | c.674G>A      | c.(673-675)aGg>aAg     |
| A | c.1806C>T     | c.(1804-1806)ttC>ttT   |
| T | c.738C>T      | c.(736-738)acC>acT     |
| A | c.1093_splice | c.e8+1                 |
| T | c.12778C>T    | c.(12778-12780)Ccc>Tcc |
| T | c.425C>T      | c.(424-426)tCc>tTc     |
| T | c.2739C>T     | c.(2737-2739)ttC>ttT   |
| T | c.1801_splice | c.e21-1                |
| T | c.5894C>T     | c.(5893-5895)cCt>cTt   |
| A | c.4046C>T     | c.(4045-4047)cCc>cTc   |
| A | c.689G>A      | c.(688-690)gGg>gAg     |
| A | c.1019C>T     | c.(1018-1020)tCa>tTa   |
| A | c.356_splice  | c.e1+1                 |
| T | c.739G>A      | c.(739-741)Gat>Aat     |
| T | c.538_splice  | c.e7-1                 |
| T | c.2337C>T     | c.(2335-2337)gcC>gcT   |
| T | c.1421C>T     | c.(1420-1422)cCa>cTa   |
| T | c.464C>T      | c.(463-465)tCc>tTc     |
| A | c.947C>T      | c.(946-948)tCg>tTg     |
| T |               |                        |
| T |               |                        |
| T | c.3G>A        | c.(1-3)atG>atA         |
| A | c.1256C>T     | c.(1255-1257)tCc>tTc   |
| T | c.418_splice  | c.e7-1                 |
| G | c.1243C>G     | c.(1243-1245)Cga>Gga   |
| T | c.170C>T      | c.(169-171)tCc>tTc     |
| A | c.1646G>A     | c.(1645-1647)cGa>cAa   |
| T | c.2716G>T     | c.(2716-2718)Gag>Tag   |
| T | c.1816G>A     | c.(1816-1818)Gat>Aat   |
| T | c.3369C>T     | c.(3367-3369)ttC>ttT   |
| C | c.2275T>C     | c.(2275-2277)Ttc>Ctc   |
| T | c.540G>A      | c.(538-540)ggG>ggA     |
| A | c.748G>A      | c.(748-750)Gac>Aac     |
| T | c.1044C>T     | c.(1042-1044)aaC>aaT   |
| A | c.757C>A      | c.(757-759)Cgc>Agc     |
| T | c.3152C>T     | c.(3151-3153)cCt>cTt   |
| A |               |                        |

|   |            |                        |
|---|------------|------------------------|
| A |            |                        |
| T | c.1528G>A  | c.(1528-1530)Gaa>Aaa   |
| T | c.446C>T   | c.(445-447)cCc>cTc     |
| T | c.274G>A   | c.(274-276)Gag>Aag     |
| T | c.82710G>A | c.(82708-82710)ggG>ggA |
| A | c.946C>T   | c.(946-948)Cct>Tct     |
| T | c.1380G>A  | c.(1378-1380)caG>caA   |
| T | c.6650C>T  | c.(6649-6651)cCg>cTg   |
| T | c.1309C>T  | c.(1309-1311)Cag>Tag   |
| A | c.184C>T   | c.(184-186)Ctt>Ttt     |
| T | c.788T>A   | c.(787-789)tTt>tAt     |
| A | c.255C>T   | c.(253-255)atC>atT     |
| A | c.3293C>T  | c.(3292-3294)aCc>aTc   |
| T | c.6389G>A  | c.(6388-6390)gGa>gAa   |
| T | c.72G>A    | c.(70-72)atG>atA       |
| T | c.553C>T   | c.(553-555)Ccc>Tcc     |
| T | c.1173G>A  | c.(1171-1173)taG>taA   |
| T |            |                        |
| T | c.589C>A   | c.(589-591)Ctt>Att     |
| A | c.52G>A    | c.(52-54)Gga>Aga       |
| T | c.1197C>T  | c.(1195-1197)ctC>ctT   |
| A | c.63G>A    | c.(61-63)gtG>gtA       |
| A | c.1532G>A  | c.(1531-1533)gGg>gAg   |
| A | c.636C>T   | c.(634-636)ttC>ttT     |
| A | c.1092G>A  | c.(1090-1092)ctG>ctA   |
| A | c.2575C>T  | c.(2575-2577)Cgc>Tgc   |
| A | c.1564G>A  | c.(1564-1566)Ggg>Agg   |
| G | c.676C>G   | c.(676-678)Cta>Gta     |
| T | c.303C>T   | c.(301-303)ttC>ttT     |
| A | c.816G>A   | c.(814-816)agG>agA     |
| A | c.6G>A     | c.(4-6)ggG>ggA         |
| A | c.122G>A   | c.(121-123)tGg>tAg     |
| A | c.166C>T   | c.(166-168)Ccc>Tcc     |
| A | c.2230C>T  | c.(2230-2232)Cct>Tct   |
| A | c.6268C>T  | c.(6268-6270)Ctg>Ttg   |
| T | c.372C>T   | c.(370-372)gtC>gtT     |
| A | c.309C>T   | c.(307-309)ttC>ttT     |
| A | c.819C>T   | c.(817-819)atC>atT     |
| T | c.153C>T   | c.(151-153)atC>atT     |
| A | c.591C>T   | c.(589-591)ttC>ttT     |
| T | c.1287C>T  | c.(1285-1287)tcC>tcT   |
| T | c.834G>A   | c.(832-834)ctG>ctA     |
| A | c.184C>T   | c.(184-186)Ctt>Ttt     |

|   |           |                      |
|---|-----------|----------------------|
| G | c.1457A>G | c.(1456-1458)tAt>tGt |
| A |           |                      |
| T | c.5142C>T | c.(5140-5142)agC>agT |
| T | c.4870G>A | c.(4870-4872)Gat>Aat |
| T | c.966C>T  | c.(964-966)ctC>ctT   |
| T |           |                      |
| T | c.892C>T  | c.(892-894)Cct>Tct   |
| T | c.900C>T  | c.(898-900)ctC>ctT   |
| T | c.661C>T  | c.(661-663)Cga>Tga   |
| A | c.3157C>T | c.(3157-3159)Cca>Tca |
| T | c.399C>T  | c.(397-399)cgC>cgT   |
| A | c.1076G>A | c.(1075-1077)aGg>aAg |
| T |           |                      |
| A | c.856G>A  | c.(856-858)Ggt>Agt   |
| A | c.831C>T  | c.(829-831)ttC>ttT   |
| T |           |                      |
| A | c.637G>A  | c.(637-639)Gaa>Aaa   |
| T | c.768G>A  | c.(766-768)acG>acA   |
| A | c.95G>A   | c.(94-96)gGa>gAa     |
| A | c.1424G>A | c.(1423-1425)gGa>gAa |
| T | c.1530C>T | c.(1528-1530)tcC>tcT |
| A | c.225G>A  | c.(223-225)gaG>gaA   |
| A | c.2806C>T | c.(2806-2808)Cga>Tga |
| T | c.6144C>T | c.(6142-6144)ctC>ctT |
| A | c.1357C>T | c.(1357-1359)Cgt>Tgt |
| A | c.178G>A  | c.(178-180)Gag>Aag   |
| T | c.5949C>T | c.(5947-5949)ttC>ttT |
| A | c.652C>T  | c.(652-654)Cgt>Tgt   |
| A | c.2917C>T | c.(2917-2919)Cac>Tac |
| T | c.2750C>T | c.(2749-2751)tCg>tTg |
| A | c.1778G>A | c.(1777-1779)gGg>gAg |
| T | c.799G>A  | c.(799-801)Gca>Aca   |
| A | c.1130C>T | c.(1129-1131)cCc>cTc |
| A | c.779G>A  | c.(778-780)cGa>cAa   |
| T | c.1317C>T | c.(1315-1317)atC>atT |
| T | c.697G>A  | c.(697-699)Gaa>Aaa   |
| T | c.2156C>T | c.(2155-2157)aCc>aTc |
| A | c.9102C>T | c.(9100-9102)atC>atT |
| A |           |                      |
| T | c.1465C>T | c.(1465-1467)Cgg>Tgg |
| A | c.214C>T  | c.(214-216)Cga>Tga   |
| A | c.408C>T  | c.(406-408)ttC>ttT   |
| A | c.5834C>T | c.(5833-5835)tCc>tTc |

|   |            |                        |
|---|------------|------------------------|
| T | c.2769G>A  | c.(2767-2769)ggG>ggA   |
| A | c.841G>A   | c.(841-843)Gga>Aga     |
| A | c.849G>A   | c.(847-849)ggG>ggA     |
| A |            |                        |
| T | c.838G>A   | c.(838-840)Gtt>Att     |
| T | c.1011C>T  | c.(1009-1011)ctC>ctT   |
| T | c.43715G>A |                        |
| T | c.709G>A   | c.(709-711)Gga>Aga     |
| T | c.3288G>A  | c.(3286-3288)aaG>aaA   |
| T | c.1513G>A  | c.(1513-1515)Gga>Aga   |
| T | c.770C>T   | c.(769-771)tCc>tTc     |
| A |            |                        |
| A | c.722C>T   | c.(721-723)tCc>tTc     |
| T | c.1915G>A  | c.(1915-1917)Gag>Aag   |
| T |            |                        |
| C | c.1073G>C  | c.(1072-1074)aGg>aCg   |
| T | c.1663C>T  | c.(1663-1665)Cat>Tat   |
| T | c.3186C>T  | c.(3184-3186)caC>caT   |
| T | c.2992C>T  | c.(2992-2994)Cca>Tca   |
| A | c.175C>T   | c.(175-177)Ccc>Tcc     |
| A | c.984C>T   | c.(982-984)ttC>ttT     |
| T |            |                        |
| G |            |                        |
| T | c.2555C>T  | c.(2554-2556)cCc>cTc   |
| T | c.1305G>A  | c.(1303-1305)ggG>ggA   |
| A | c.435C>T   | c.(433-435)gcC>gcT     |
| T | c.821G>A   | c.(820-822)aGg>aAg     |
| T | c.189G>A   | c.(187-189)gtG>gtA     |
| A | c.26430C>T | c.(26428-26430)gcC>gcT |
| T | c.295G>A   | c.(295-297)Gag>Aag     |
| T | c.2207C>T  | c.(2206-2208)cCg>cTg   |
| T |            |                        |
| A | c.795C>T   | c.(793-795)ttC>ttT     |
| T | c.2473G>A  | c.(2473-2475)Gat>Aat   |
| A | c.4757G>A  | c.(4756-4758)aGg>aAg   |
| A | c.1812G>A  | c.(1810-1812)ctG>ctA   |
| A | c.557G>A   | c.(556-558)cGa>cAa     |
| T | c.209G>A   | c.(208-210)gGa>gAa     |
| T |            |                        |
| T | c.1364C>T  | c.(1363-1365)aCc>aTc   |
| T | c.2499C>T  | c.(2497-2499)acC>acT   |
| A | c.3557G>A  | c.(3556-3558)cGa>cAa   |
| T | c.5327G>A  | c.(5326-5328)gGg>gAg   |

|   |            |                        |
|---|------------|------------------------|
| T | c.2496G>A  | c.(2494-2496)caG>caA   |
| T | c.49C>T    | c.(49-51)Ccc>Tcc       |
| G |            |                        |
| T |            |                        |
| T | c.3065G>A  | c.(3064-3066)gGt>gAt   |
| T | c.2675G>A  | c.(2674-2676)cGa>cAa   |
| T | c.388G>A   | c.(388-390)Gac>Aac     |
| A |            |                        |
| T | c.2426G>A  | c.(2425-2427)gGa>gAa   |
| T | c.63C>T    | c.(61-63)gcC>gcT       |
| T | c.310C>T   | c.(310-312)Ccc>Tcc     |
| A |            |                        |
| A | c.28118C>T | c.(28117-28119)cCt>cTt |
| T | c.42C>T    | c.(40-42)ctC>ctT       |
| A | c.417G>A   | c.(415-417)tgG>tgA     |
| T | c.33C>T    | c.(31-33)atC>atT       |
| A | c.1853G>A  | c.(1852-1854)gGa>gAa   |
| T | c.2198C>T  | c.(2197-2199)tCc>tTc   |
| A | c.1164A>T  | c.(1162-1164)ctA>ctT   |
| T | c.993C>T   | c.(991-993)atC>atT     |
| A | c.268G>A   | c.(268-270)Gga>Aga     |
| A | c.449C>T   | c.(448-450)gCc>gTc     |
| T | c.401G>A   | c.(400-402)gGg>gAg     |
| A | c.1400G>A  | c.(1399-1401)aGa>aAa   |
| A | c.633G>A   | c.(631-633)cgG>cgA     |
| T | c.507C>T   | c.(505-507)gcC>gcT     |
| A | c.4289G>A  | c.(4288-4290)gGa>gAa   |
| A | c.2508C>T  | c.(2506-2508)ttC>ttT   |
| T | c.1645T>A  | c.(1645-1647)Ttc>Atc   |
| T | c.48C>T    | c.(46-48)taC>taT       |
| A | c.2550C>T  | c.(2548-2550)ctC>ctT   |
| T | c.2323G>A  | c.(2323-2325)Gaa>Aaa   |
| T | c.3756C>T  | c.(3754-3756)tcC>tcT   |
| A |            |                        |
| A | c.671G>A   | c.(670-672)gGa>gAa     |
| T | c.1431C>T  | c.(1429-1431)ccC>ccT   |
| A |            |                        |
| T | c.279C>T   | c.(277-279)aaC>aaT     |
| T | c.2467G>A  | c.(2467-2469)Gga>Aga   |
| T |            |                        |
| A | c.379G>A   | c.(379-381)Gag>Aag     |
| A | c.629G>A   | c.(628-630)gGa>gAa     |
| A | c.782C>T   | c.(781-783)tCt>tTt     |

|   |               |                      |
|---|---------------|----------------------|
| A | c.1097G>A     | c.(1096-1098)cGa>cAa |
| A | c.87C>T       | c.(85-87)tcC>tcT     |
| T | c.1911G>A     | c.(1909-1911)agG>agA |
| A | c.1780C>T     | c.(1780-1782)Cgt>Tgt |
| A | c.636C>T      | c.(634-636)ctC>ctT   |
| T | c.3145G>A     | c.(3145-3147)Gtg>Atg |
| A | c.7443G>A     | c.(7441-7443)atG>atA |
| A | c.216C>T      | c.(214-216)ttC>ttT   |
| A | c.782C>T      | c.(781-783)tCc>tTc   |
| T | c.2774G>A     | c.(2773-2775)gGt>gAt |
| A | c.761T>A      | c.(760-762)cTa>cAa   |
| A | c.7241G>A     | c.(7240-7242)gGa>gAa |
| T | c.1104G>A     | c.(1102-1104)aaG>aaA |
| A | c.1029C>T     | c.(1027-1029)atC>atT |
| A | c.179G>A      | c.(178-180)aGa>aAa   |
| T | c.43C>T       | c.(43-45)Ctg>Ttg     |
| T |               |                      |
| T | c.60G>A       | c.(58-60)ggG>ggA     |
| A | c.529G>A      | c.(529-531)Gct>Act   |
| A | c.998C>T      | c.(997-999)gCc>gTc   |
| A | c.259C>T      | c.(259-261)Cgt>Tgt   |
| T | c.329C>T      | c.(328-330)tCg>tTg   |
| A | c.370C>T      | c.(370-372)Cag>Tag   |
| T | c.3695C>T     | c.(3694-3696)cCg>cTg |
| T | c.696C>T      | c.(694-696)ttC>ttT   |
| T | c.50079G>A    |                      |
| A | c.1308G>A     | c.(1306-1308)ctG>ctA |
| C | c.1007A>G     | c.(1006-1008)aAg>aGg |
| A | c.4343_splice | c.e20-1              |
| A | c.503G>A      | c.(502-504)gGg>gAg   |
| T | c.2907_splice | c.e24-1              |
| G | c.2808G>C     | c.(2806-2808)caG>caC |
| A | c.10350C>T    |                      |
| T | c.505C>T      | c.(505-507)Cat>Tat   |
| A | c.168C>T      | c.(166-168)ctC>ctT   |
| A | c.3863C>T     | c.(3862-3864)cCa>cTa |
| T | c.928G>A      | c.(928-930)Gaa>Aaa   |
| A | c.864C>T      | c.(862-864)atC>atT   |
| A | c.759G>A      | c.(757-759)ctG>ctA   |
| A | c.315G>A      | c.(313-315)gaG>gaA   |
| T | c.595C>T      | c.(595-597)Cag>Tag   |
| T |               |                      |
| A | c.193G>A      | c.(193-195)Ggc>Agc   |

|   |              |                      |
|---|--------------|----------------------|
| A | c.108G>A     | c.(106-108)aaG>aaA   |
| A | c.851C>T     | c.(850-852)tCt>tTt   |
| T | c.220C>T     | c.(220-222)Cct>Tct   |
| G | c.356A>G     | c.(355-357)aAc>aGc   |
| T | c.1060C>T    | c.(1060-1062)Cgg>Tgg |
| A | c.480G>T     | c.(478-480)ctG>ctT   |
| T | c.5893C>T    | c.(5893-5895)Cct>Tct |
| T | c.1251C>T    | c.(1249-1251)atC>atT |
| T | c.913G>A     | c.(913-915)Gaa>Aaa   |
| T | c.450C>T     | c.(448-450)ttC>ttT   |
| A | c.135G>T     | c.(133-135)aaG>aaT   |
| A | c.541C>T     | c.(541-543)Cgt>Tgt   |
| A | c.1373G>A    | c.(1372-1374)gGa>gAa |
| T | c.661G>A     | c.(661-663)Gaa>Aaa   |
| G | c.242_splice | c.e3-1               |
| T | c.503G>A     | c.(502-504)cGa>cAa   |
| T | c.16G>A      | c.(16-18)Gat>Aat     |
| A | c.732G>A     | c.(730-732)acG>acA   |
| A | c.2028C>T    | c.(2026-2028)ttC>ttT |
| T | c.143C>T     | c.(142-144)aCc>aTc   |
| A | c.102C>T     | c.(100-102)gcC>gcT   |
| A |              |                      |
| A | c.847G>A     | c.(847-849)Gag>Aag   |
| A | c.914C>T     | c.(913-915)tCc>tTc   |
| A | c.513C>T     | c.(511-513)ttC>ttT   |
| T | c.5295G>A    | c.(5293-5295)caG>caA |
| T | c.237C>T     | c.(235-237)tcC>tcT   |
| T | c.881G>A     | c.(880-882)gGc>gAc   |
| A | c.660C>T     | c.(658-660)ctC>ctT   |
| T | c.2556C>T    | c.(2554-2556)ccC>ccT |
| T | c.894G>A     | c.(892-894)gaG>gaA   |
| A | c.294G>A     | c.(292-294)agG>agA   |
| A |              |                      |
| A | c.1294C>T    | c.(1294-1296)Cgt>Tgt |
| G |              |                      |
| T | c.1848C>T    | c.(1846-1848)ggC>ggT |
| T | c.16C>T      | c.(16-18)Ctc>Ttc     |
| T | c.72C>T      | c.(70-72)gtC>gtT     |
| G | c.682G>C     | c.(682-684)Gag>Cag   |
| A | c.688C>T     | c.(688-690)Ctg>Ttg   |
| A | c.1091C>T    | c.(1090-1092)tCc>tTc |
| A | c.1474G>A    | c.(1474-1476)Gag>Aag |
| T | c.910C>T     | c.(910-912)Cag>Tag   |



|   |               |                        |
|---|---------------|------------------------|
| A | c.881G>T      | c.(880-882)gGa>gTa     |
| T | c.602C>T      | c.(601-603)tCt>tTt     |
| T | c.1273G>A     | c.(1273-1275)Gaa>Aaa   |
| A | c.447G>A      | c.(445-447)atG>atA     |
| T | c.117C>T      | c.(115-117)ttC>ttT     |
| T | c.2411C>T     | c.(2410-2412)gCc>gTc   |
| T | c.1749T>A     | c.(1747-1749)caT>caA   |
| A | c.663C>T      | c.(661-663)ctC>ctT     |
| A | c.1585C>T     | c.(1585-1587)Ccg>Tcg   |
| T | c.1161C>T     |                        |
| T |               |                        |
| A | c.151G>A      | c.(151-153)Gga>Aga     |
| A | c.567C>T      | c.(565-567)ttC>ttT     |
| T | c.127C>T      | c.(127-129)Cca>Tca     |
| T | c.376G>A      | c.(376-378)Gac>Aac     |
| T | c.1293C>T     | c.(1291-1293)atC>atT   |
| A |               |                        |
| A | c.241G>A      | c.(241-243)Gaa>Aaa     |
| A | c.424C>T      | c.(424-426)Ccc>Tcc     |
| T | c.2881C>T     | c.(2881-2883)Ctt>Ttt   |
| T | c.13078C>T    | c.(13078-13080)Cca>Tca |
| T | c.65C>T       | c.(64-66)tCg>tTg       |
| A | c.975C>T      | c.(973-975)ggC>ggT     |
| T | c.39C>T       | c.(37-39)ttC>ttT       |
| A | c.463G>A      | c.(463-465)Gga>Aga     |
| T | c.2737C>T     | c.(2737-2739)Cag>Tag   |
| A |               |                        |
| G | c.2342_splice | c.e24-2                |
| T | c.8764G>A     | c.(8764-8766)Gat>Aat   |
| A |               |                        |
| T | c.871C>T      | c.(871-873)Ctc>Ttc     |
| A | c.1972G>A     | c.(1972-1974)Ggg>Agg   |
| T |               |                        |
| G | c.3775_splice | c.e24-1                |
| A | c.2392G>A     | c.(2392-2394)Gac>Aac   |
| T | c.3482G>A     | c.(3481-3483)aGg>aAg   |
| A | c.650G>A      | c.(649-651)gGg>gAg     |
| T | c.210G>A      | c.(208-210)acG>acA     |
| T | c.1441C>T     | c.(1441-1443)Ccc>Tcc   |
| T | c.1456C>T     | c.(1456-1458)Cag>Tag   |
| A | c.1655C>T     | c.(1654-1656)gCc>gTc   |
| A | c.637C>T      | c.(637-639)Cct>Tct     |
| T |               |                        |

|   |            |                        |
|---|------------|------------------------|
| A | c.733G>A   | c.(733-735)Gaa>Aaa     |
| T | c.3718G>A  | c.(3718-3720)Gaa>Aaa   |
| T | c.715G>A   | c.(715-717)Gga>Aga     |
| A | c.1707C>T  | c.(1705-1707)gtC>gtT   |
| A | c.513C>T   | c.(511-513)ttC>ttT     |
| A | c.1882G>A  | c.(1882-1884)Gaa>Aaa   |
| A | c.262G>A   | c.(262-264)Ggc>Agc     |
| T | c.1791G>A  | c.(1789-1791)ggG>ggA   |
| T | c.17077G>A | c.(17077-17079)Gag>Aag |
| A | c.876C>T   | c.(874-876)atC>atT     |
| T | c.278C>T   | c.(277-279)aCc>aTc     |
| A | c.1120C>T  | c.(1120-1122)Cat>Tat   |
| T | c.1568C>T  | c.(1567-1569)tCc>tTc   |
| A | c.217G>A   | c.(217-219)Ggt>Agt     |
| A | c.312C>T   | c.(310-312)ttC>ttT     |
| T | c.655G>A   | c.(655-657)Gag>Aag     |
| T |            |                        |
| A | c.5292C>T  | c.(5290-5292)atC>atT   |
| T | c.236C>T   | c.(235-237)tCc>tTc     |
| A | c.741C>T   | c.(739-741)atC>atT     |
| T |            |                        |
| T | c.780C>T   | c.(778-780)ttC>ttT     |
| G | c.2398C>G  | c.(2398-2400)Ctg>Gtg   |
| T | c.72G>A    | c.(70-72)cgG>cgA       |
| A | c.482C>T   | c.(481-483)gCc>gTc     |
| A | c.2477C>T  | c.(2476-2478)tCc>tTc   |
| C | c.190A>G   | c.(190-192)Ata>Gta     |
| A |            |                        |
| A | c.1302C>T  | c.(1300-1302)atC>atT   |
| A | c.1302C>T  | c.(1300-1302)ttC>ttT   |
| A |            |                        |
| A | c.3282G>A  | c.(3280-3282)aaG>aaA   |
| A | c.312C>T   | c.(310-312)tcC>tcT     |
| A | c.586G>A   | c.(586-588)Gaa>Aaa     |
| A | c.828G>T   | c.(826-828)ttG>ttT     |
| T | c.784G>A   | c.(784-786)Gga>Aga     |
| T | c.107C>T   | c.(106-108)aCt>aTt     |
| A | c.2649C>T  | c.(2647-2649)ccC>ccT   |
| T | c.1684G>A  | c.(1684-1686)Gag>Aag   |
| T | c.5508G>A  | c.(5506-5508)atG>atA   |
| T | c.668G>A   | c.(667-669)gGc>gAc     |
| T | c.3663C>T  | c.(3661-3663)ggC>ggT   |
| A | c.2932G>A  | c.(2932-2934)Gaa>Aaa   |

|   |              |                      |
|---|--------------|----------------------|
| T | c.330G>A     | c.(328-330)gcG>gcA   |
| T | c.1588G>A    | c.(1588-1590)Gag>Aag |
| T |              |                      |
| A | c.2192G>A    | c.(2191-2193)gGa>gAa |
| A | c.283G>A     | c.(283-285)Gaa>Aaa   |
| A | c.1875C>T    | c.(1873-1875)gcC>gcT |
| A |              |                      |
| T | c.5046G>A    | c.(5044-5046)atG>atA |
| T | c.7837G>A    | c.(7837-7839)Gag>Aag |
| T | c.1310C>T    | c.(1309-1311)cCc>cTc |
| T | c.91C>T      | c.(91-93)Cca>Tca     |
| A |              |                      |
| T | c.-74_splice | c.e1-1               |
| A |              |                      |
| T | c.901C>T     | c.(901-903)Ctg>Ttg   |
| T | c.825C>T     | c.(823-825)ttC>ttT   |
| T | c.984C>T     | c.(982-984)ttC>ttT   |
| A | c.908G>A     | c.(907-909)cGa>cAa   |
| T | c.2149C>T    | c.(2149-2151)Ccc>Tcc |
| A | c.4696G>A    | c.(4696-4698)Gaa>Aaa |
| T | c.264G>A     | c.(262-264)gtG>gtA   |
| G | c.1657A>G    | c.(1657-1659)Acc>Gcc |
| T | c.341G>A     | c.(340-342)aGa>aAa   |
| T | c.1720G>A    | c.(1720-1722)Gag>Aag |
| A | c.2541G>A    | c.(2539-2541)atG>atA |
| T | c.626C>T     | c.(625-627)gCt>gTt   |
| T | c.36T>A      | c.(34-36)taT>taA     |
| A | c.1696C>T    | c.(1696-1698)Cat>Tat |
| A | c.528A>T     | c.(526-528)gaA>gaT   |
| T | c.1117G>A    | c.(1117-1119)Gag>Aag |
| T | c.211G>A     | c.(211-213)Gag>Aag   |
| A |              |                      |
| T | c.691G>A     | c.(691-693)Ggc>Agc   |
| T | c.5157C>T    | c.(5155-5157)ctC>ctT |
| T | c.542C>T     | c.(541-543)tCc>tTc   |
| T | c.645C>T     | c.(643-645)ttC>ttT   |
| A | c.803C>T     | c.(802-804)aCc>aTc   |
| A | c.289G>A     | c.(289-291)Gaa>Aaa   |
| T | c.899C>T     | c.(898-900)aCt>aTt   |
| T | c.2051G>A    | c.(2050-2052)aGg>aAg |
| T | c.615C>T     | c.(613-615)gtC>gtT   |
| T |              |                      |
| A | c.5C>T       | c.(4-6)cCa>cTa       |

|   |            |                        |
|---|------------|------------------------|
| A |            |                        |
| T | c.1948G>T  | c.(1948-1950)Gag>Tag   |
| T |            |                        |
| A | c.106C>T   | c.(106-108)Cgc>Tgc     |
| A | c.263G>A   | c.(262-264)aGt>aAt     |
| A | c.2584G>A  | c.(2584-2586)Gaa>Aaa   |
| A | c.10953C>T | c.(10951-10953)ttC>ttT |
| T | c.347A>T   | c.(346-348)cAa>cTa     |
| T | c.244C>T   | c.(244-246)Cgt>Tgt     |
| T | c.1162G>A  | c.(1162-1164)Gaa>Aaa   |
| C | c.1390T>C  | c.(1390-1392)Tac>Cac   |
| A | c.1432C>T  |                        |
| T | c.1302C>T  | c.(1300-1302)tcC>tcT   |
| A | c.3582C>T  | c.(3580-3582)atC>atT   |
| T |            |                        |
| A | c.212C>T   | c.(211-213)cCc>cTc     |
| T | c.2876G>T  | c.(2875-2877)tGg>tTg   |
| A | c.1511C>T  | c.(1510-1512)tCc>tTc   |
| A | c.518C>T   | c.(517-519)tCc>tTc     |
| T | c.1266G>A  | c.(1264-1266)aaG>aaA   |
| A | c.1122C>T  | c.(1120-1122)ttC>ttT   |
| A | c.2836C>T  | c.(2836-2838)Ccc>Tcc   |
| T |            |                        |
| A | c.1257C>T  | c.(1255-1257)ttC>ttT   |
| T |            |                        |
| T | c.11011C>T | c.(11011-11013)Caa>Taa |
| A | c.840G>A   | c.(838-840)ggG>ggA     |
| A | c.871G>A   | c.(871-873)Gat>Aat     |
| A |            |                        |
| A | c.442G>A   | c.(442-444)Gac>Aac     |
| T | c.3633C>T  | c.(3631-3633)gcC>gcT   |
| A | c.924G>A   | c.(922-924)gaG>gaA     |
| T |            |                        |
| T |            |                        |
| T | c.568G>A   | c.(568-570)Gag>Aag     |
| A | c.506C>T   | c.(505-507)gCc>gTc     |
| A | c.123C>T   | c.(121-123)ctC>ctT     |
| T | c.1880C>T  | c.(1879-1881)cCc>cTc   |
| T | c.3250G>A  | c.(3250-3252)Gag>Aag   |
| A | c.4409C>T  | c.(4408-4410)tCg>tTg   |
| C | c.1193A>G  | c.(1192-1194)tAt>tGt   |
| A | c.285C>T   | c.(283-285)ttC>ttT     |
| A | c.4199C>T  | c.(4198-4200)tCc>tTc   |

|   |               |                      |
|---|---------------|----------------------|
| A | c.1048C>T     | c.(1048-1050)Ccg>Tcg |
| T |               |                      |
| T | c.3034C>T     | c.(3034-3036)Cgc>Tgc |
| A | c.5773C>T     | c.(5773-5775)Cga>Tga |
| A | c.1207C>T     | c.(1207-1209)Cca>Tca |
| T | c.1067C>T     | c.(1066-1068)tCg>tTg |
| A |               |                      |
| A | c.319G>A      | c.(319-321)Gga>Aga   |
| A | c.5697C>T     | c.(5695-5697)ttC>ttT |
| A | c.1581_splice | c.e13-1              |
| T | c.2101G>A     | c.(2101-2103)Gga>Aga |
| T | c.1740C>T     | c.(1738-1740)gtC>gtT |
| A | c.1282G>A     | c.(1282-1284)Gac>Aac |
| T | c.426C>T      | c.(424-426)ttC>ttT   |
| A | c.1841G>A     | c.(1840-1842)cGa>cAa |
| T | c.4G>A        | c.(4-6)Gga>Aga       |
| T | c.1944C>T     | c.(1942-1944)atC>atT |
| A | c.559C>T      | c.(559-561)Cac>Tac   |
| T | c.465C>A      | c.(463-465)ccC>ccA   |
| A | c.580G>A      | c.(580-582)Gaa>Aaa   |
| T | c.1536C>T     | c.(1534-1536)ctC>ctT |
| G | c.4345G>C     | c.(4345-4347)Gac>Cac |
| T | c.830C>T      | c.(829-831)tCg>tTg   |
| T | c.802C>T      | c.(802-804)Cat>Tat   |
| T | c.2809G>A     | c.(2809-2811)Gaa>Aaa |
| A | c.453C>T      | c.(451-453)atC>atT   |
| T | c.1140G>A     | c.(1138-1140)cgG>cgA |
| G | c.1787T>G     | c.(1786-1788)gTg>gGg |
| T | c.443C>T      | c.(442-444)cCc>cTc   |
| A | c.487C>T      | c.(487-489)Cgt>Tgt   |
| A | c.341G>A      | c.(340-342)aGg>aAg   |
| A | c.258C>T      | c.(256-258)ctC>ctT   |
| T | c.919G>A      | c.(919-921)Gag>Aag   |
| A | c.186C>T      | c.(184-186)atC>atT   |
| T | c.3598C>T     | c.(3598-3600)Ccg>Tcg |
| T | c.1741G>A     | c.(1741-1743)Ggg>Agg |
| T |               |                      |
| T | c.842C>T      | c.(841-843)cCc>cTc   |
| A |               |                      |
| A | c.3227G>T     | c.(3226-3228)aGa>aTa |
| A | c.459C>T      | c.(457-459)atC>atT   |
| A | c.1465C>T     | c.(1465-1467)Cca>Tca |
| T | c.827G>A      | c.(826-828)gGg>gAg   |

|   |              |                        |
|---|--------------|------------------------|
| T | c.3351C>T    | c.(3349-3351)ctC>ctT   |
| T | c.447C>T     | c.(445-447)ccC>ccT     |
| T | c.941C>T     | c.(940-942)tCa>tTa     |
| A | c.7004G>A    | c.(7003-7005)gGa>gAa   |
| T | c.2072C>T    | c.(2071-2073)tCa>tTa   |
| A | c.562C>T     | c.(562-564)Cgg>Tgg     |
| T | c.823C>T     | c.(823-825)Ctg>Ttg     |
| T |              |                        |
| A | c.11110G>A   | c.(11110-11112)Gat>Aat |
| A | c.673G>A     | c.(673-675)Gac>Aac     |
| A | c.867C>T     | c.(865-867)ctC>ctT     |
| T | c.690G>A     | c.(688-690)gtG>gtA     |
| T | c.2368G>A    | c.(2368-2370)Gag>Aag   |
| A | c.959C>T     | c.(958-960)tCc>tTc     |
| A | c.446_splice | c.e5-1                 |
| T | c.557C>T     | c.(556-558)tCa>tTa     |
| A | c.519C>T     | c.(517-519)tcC>tcT     |
| A | c.663C>T     | c.(661-663)atC>atT     |
| T | c.1446G>A    | c.(1444-1446)gaG>gaA   |
| A | c.188C>T     | c.(187-189)tCa>tTa     |
| T | c.2257G>A    | c.(2257-2259)Gaa>Aaa   |
| T | c.225C>T     | c.(223-225)ttC>ttT     |
| A | c.15290C>T   | c.(15289-15291)tCa>tTa |
| T | c.841G>A     | c.(841-843)Gat>Aat     |
| T | c.3421G>A    | c.(3421-3423)Gaa>Aaa   |
| A | c.1723G>A    | c.(1723-1725)Gaa>Aaa   |
| T | c.2264C>T    | c.(2263-2265)tCc>tTc   |
| T |              |                        |
| A |              |                        |
| A | c.8927G>A    | c.(8926-8928)aGa>aAa   |
| T | c.600C>T     | c.(598-600)tcC>tcT     |
| A | c.619G>A     | c.(619-621)Gga>Aga     |
| A | c.84G>A      | c.(82-84)agG>agA       |
| T | c.3312C>T    | c.(3310-3312)gtC>gtT   |
| A | c.9304C>T    | c.(9304-9306)Cct>Tct   |
| T | c.1323C>T    | c.(1321-1323)gcC>gcT   |
| A | c.1336C>T    | c.(1336-1338)Ccc>Tcc   |
| T | c.35G>A      | c.(34-36)gGa>gAa       |
| G | c.2154G>C    | c.(2152-2154)gaG>gaC   |
| A | c.133C>T     | c.(133-135)Cag>Tag     |
| T | c.5692C>T    | c.(5692-5694)Cca>Tca   |
| A | c.1946C>T    | c.(1945-1947)tCa>tTa   |
| T | c.266G>A     | c.(265-267)cGa>cAa     |

|   |            |                        |
|---|------------|------------------------|
| A | c.875C>T   | c.(874-876)gCc>gTc     |
| T | c.2474G>A  | c.(2473-2475)aGg>aAg   |
| A | c.1089G>A  | c.(1087-1089)tgG>tgA   |
| A | c.319G>A   | c.(319-321)Gcc>Acc     |
| T | c.353G>A   | c.(352-354)gGa>gAa     |
| A | c.2066G>A  | c.(2065-2067)gGa>gAa   |
| A | c.2190G>A  | c.(2188-2190)atG>atA   |
| A | c.1122C>T  | c.(1120-1122)atC>atT   |
| T | c.1848G>A  | c.(1846-1848)gaG>gaA   |
| A |            |                        |
| A | c.1504G>A  | c.(1504-1506)Gag>Aag   |
| A | c.4654G>A  | c.(4654-4656)Gag>Aag   |
| A | c.942C>T   | c.(940-942)atC>atT     |
| A | c.1276G>A  | c.(1276-1278)Ggg>Agg   |
| A | c.1560C>T  | c.(1558-1560)ggC>ggT   |
| T | c.2425G>A  | c.(2425-2427)Gga>Aga   |
| T | c.383C>T   |                        |
| A | c.3682G>A  | c.(3682-3684)Gaa>Aaa   |
| A | c.3001G>A  | c.(3001-3003)Gaa>Aaa   |
| T | c.2803G>A  | c.(2803-2805)Gag>Aag   |
| A | c.2197G>A  | c.(2197-2199)Gga>Aga   |
| T | c.1397C>T  | c.(1396-1398)tCa>tTa   |
| C | c.642T>C   | c.(640-642)tcT>tcC     |
| A | c.986C>T   | c.(985-987)cCc>cTc     |
| T | c.1117C>T  | c.(1117-1119)Ccc>Tcc   |
| A | c.222G>A   | c.(220-222)tgG>tgA     |
| T | c.589G>A   | c.(589-591)Gaa>Aaa     |
| T | c.766G>A   | c.(766-768)Gaa>Aaa     |
| T | c.383C>T   | c.(382-384)tCc>tTc     |
| A | c.550C>T   | c.(550-552)Cgc>Tgc     |
| A | c.644C>T   | c.(643-645)cCg>cTg     |
| T | c.1633G>A  | c.(1633-1635)Gaa>Aaa   |
| T | c.1156C>T  | c.(1156-1158)Ccg>Tcg   |
| T | c.2669C>T  | c.(2668-2670)cCt>cTt   |
| A | c.90T>A    | c.(88-90)aaT>aaA       |
| A | c.4782C>T  | c.(4780-4782)ccC>ccT   |
| A | c.58G>A    | c.(58-60)Gaa>Aaa       |
| A | c.808C>T   | c.(808-810)Ctg>Ttg     |
| A | c.550G>A   | c.(550-552)Gaa>Aaa     |
| A | c.548G>A   | c.(547-549)gGc>gAc     |
| A | c.16954G>A | c.(16954-16956)Gaa>Aaa |
| T | c.863T>A   | c.(862-864)tTt>tAt     |
| T | c.671C>T   | c.(670-672)gCt>gTt     |

|   |              |                        |
|---|--------------|------------------------|
| T | c.9206G>A    | c.(9205-9207)aGa>aAa   |
| A | c.1092G>T    | c.(1090-1092)acG>acT   |
| A | c.3025G>A    | c.(3025-3027)Gaa>Aaa   |
| A |              |                        |
| T | c.1174C>T    | c.(1174-1176)Cca>Tca   |
| T | c.760C>T     | c.(760-762)Ctg>Ttg     |
| T |              |                        |
| T | c.1786C>T    | c.(1786-1788)Ctg>Ttg   |
| T | c.1195G>A    | c.(1195-1197)Gtg>Atg   |
| A | c.194C>T     | c.(193-195)tCc>tTc     |
| T | c.916C>T     | c.(916-918)Cgc>Tgc     |
| T | c.1554C>T    | c.(1552-1554)ttC>ttT   |
| T | c.572C>T     | c.(571-573)gCc>gTc     |
| A | c.13783G>A   | c.(13783-13785)Gaa>Aaa |
| A | c.659C>T     | c.(658-660)aCc>aTc     |
| A | c.6169G>A    | c.(6169-6171)Ggt>Agt   |
| A | c.3842C>T    | c.(3841-3843)tCc>tTc   |
| A | c.484C>T     | c.(484-486)Cgt>Tgt     |
| A | c.2756G>A    | c.(2755-2757)aGa>aAa   |
| A | c.1254C>T    | c.(1252-1254)ctC>ctT   |
| A | c.1084G>A    | c.(1084-1086)Gac>Aac   |
| T |              |                        |
| T | c.3252G>A    | c.(3250-3252)ttG>ttA   |
| T | c.825_splice | c.e7+1                 |
| A | c.1929C>T    | c.(1927-1929)ctC>ctT   |
| T | c.1305G>A    | c.(1303-1305)tgG>tgA   |
| T | c.646C>T     | c.(646-648)Cag>Tag     |
| T | c.172C>T     | c.(172-174)Cct>Tct     |
| T | c.1974G>A    | c.(1972-1974)tgG>tgA   |
| A | c.576C>T     | c.(574-576)tcC>tcT     |
| T | c.1338C>T    | c.(1336-1338)atC>atT   |
| T | c.4203G>A    | c.(4201-4203)tgG>tgA   |
| T | c.3336C>T    | c.(3334-3336)ccC>ccT   |
| T | c.319C>T     | c.(319-321)Cct>Tct     |
| T | c.9281C>T    | c.(9280-9282)cCa>cTa   |
| T | c.517G>A     | c.(517-519)Gga>Aga     |
| T |              |                        |
| T | c.2385C>T    | c.(2383-2385)ttC>ttT   |
| T | c.1917G>A    | c.(1915-1917)gaG>gaA   |
| A | c.601G>A     | c.(601-603)Gat>Aat     |
| T | c.750C>T     | c.(748-750)atC>atT     |
| T | c.758C>A     | c.(757-759)gCa>gAa     |



|   |               |                      |
|---|---------------|----------------------|
| T |               |                      |
| A | c.75G>A       | c.(73-75)caG>caA     |
| A | c.1171C>T     | c.(1171-1173)Ctc>Ttc |
| A | c.1384G>A     | c.(1384-1386)Gac>Aac |
| T | c.1093_splice | c.e8+1               |
| T | c.474T>A      | c.(472-474)aaT>aaA   |
| A | c.647C>T      | c.(646-648)tCc>tTc   |
| A | c.1809C>T     | c.(1807-1809)tcC>tcT |
| A | c.1155G>A     | c.(1153-1155)ggG>ggA |
| G |               |                      |
| A | c.595C>T      | c.(595-597)Ccc>Tcc   |
| A | c.376C>T      | c.(376-378)Ccg>Tcg   |
| T | c.5018G>A     | c.(5017-5019)gGg>gAg |
| T |               |                      |
| T | c.125C>T      | c.(124-126)cCa>cTa   |
| A | c.9049C>T     | c.(9049-9051)Cgg>Tgg |
| T | c.187C>T      | c.(187-189)Cga>Tga   |
| T | c.1030C>T     | c.(1030-1032)Cct>Tct |
| A | c.782T>A      | c.(781-783)tTt>tAt   |
| T | c.15C>T       | c.(13-15)tcC>tcT     |
| T |               |                      |
| T | c.438C>T      | c.(436-438)atC>atT   |
| A | c.829G>A      | c.(829-831)Gac>Aac   |
| T |               |                      |
| T | c.653C>T      | c.(652-654)aCc>aTc   |
| T |               |                      |
| A | c.723A>T      | c.(721-723)ccA>ccT   |
| T | c.7494C>T     | c.(7492-7494)atC>atT |
| A |               |                      |
| T | c.466C>T      | c.(466-468)Ctt>Ttt   |
| T | c.314G>A      | c.(313-315)gGc>gAc   |
| T | c.146G>A      | c.(145-147)gGa>gAa   |
| T | c.1100C>T     | c.(1099-1101)tCc>tTc |
| A |               |                      |
| T | c.2318C>T     | c.(2317-2319)tCc>tTc |
| A | c.2631C>T     | c.(2629-2631)taC>taT |
| T | c.303C>T      | c.(301-303)ccC>ccT   |
| A | c.300C>T      | c.(298-300)caC>caT   |
| A | c.1805C>T     | c.(1804-1806)tCc>tTc |
| T | c.464A>T      | c.(463-465)gAt>gTt   |
| A | c.3958G>A     | c.(3958-3960)Gtc>Atc |
| T | c.1261G>A     | c.(1261-1263)Gaa>Aaa |
| A | c.2853C>T     |                      |

|   |               |                        |
|---|---------------|------------------------|
| T | c.142A>T      | c.(142-144)Aag>Tag     |
| C |               |                        |
| A | c.368C>T      | c.(367-369)tCc>tTc     |
| T | c.126C>A      | c.(124-126)atC>atA     |
| A | c.302C>T      | c.(301-303)tCg>tTg     |
| T |               |                        |
| A | c.904G>A      | c.(904-906)Ggc>Agc     |
| T | c.4484_splice | c.e28+1                |
| T | c.208C>T      | c.(208-210)Ctg>Ttg     |
| T | c.3069G>A     | c.(3067-3069)gaG>gaA   |
| T | c.626C>T      | c.(625-627)tCc>tTc     |
| T | c.807G>A      | c.(805-807)agG>agA     |
| T | c.1573G>A     | c.(1573-1575)Gga>Aga   |
| T | c.1009G>A     | c.(1009-1011)Gag>Aag   |
| A | c.4414G>A     | c.(4414-4416)Gag>Aag   |
| A | c.1208C>T     | c.(1207-1209)cCa>cTa   |
| T | c.773G>A      | c.(772-774)cGa>cAa     |
| A | c.690G>A      | c.(688-690)gtG>gtA     |
| A | c.3023G>A     | c.(3022-3024)gGa>gAa   |
| G |               |                        |
| A |               |                        |
| T | c.1231G>A     | c.(1231-1233)Gaa>Aaa   |
| T | c.394G>A      | c.(394-396)Gat>Aat     |
| T | c.3318C>T     | c.(3316-3318)tcC>tcT   |
| A | c.739C>A      | c.(739-741)Ccc>Acc     |
| A | c.5642C>T     | c.(5641-5643)tCt>tTt   |
| C | c.2864G>C     | c.(2863-2865)gGa>gCa   |
| T |               |                        |
| A | c.2250C>T     | c.(2248-2250)gcC>gcT   |
| T | c.302C>T      | c.(301-303)cCc>cTc     |
| A | c.1061C>T     | c.(1060-1062)cCt>cTt   |
| A | c.1719G>A     | c.(1717-1719)aaG>aaA   |
| T | c.1852G>A     | c.(1852-1854)Gaa>Aaa   |
| T | c.363C>T      | c.(361-363)ttC>ttT     |
| A | c.575C>T      | c.(574-576)tCc>tTc     |
| C | c.224G>C      | c.(223-225)gGa>gCa     |
| A |               |                        |
| T | c.10977C>T    | c.(10975-10977)ttC>ttT |
| A | c.331C>T      | c.(331-333)Cag>Tag     |
| A | c.294G>A      | c.(292-294)ggG>ggA     |
| C | c.2093A>G     | c.(2092-2094)cAt>cGt   |
| A | c.429C>T      | c.(427-429)gtC>gtT     |
| A | c.3210C>T     | c.(3208-3210)tcC>tcT   |

|   |              |                        |
|---|--------------|------------------------|
| T | c.328C>T     | c.(328-330)Ctg>Ttg     |
| T |              |                        |
| T | c.807G>A     | c.(805-807)gaG>gaA     |
| A | c.1387G>A    | c.(1387-1389)Ggg>Agg   |
| T | c.2000G>A    | c.(1999-2001)cGa>cAa   |
| A | c.1586C>T    | c.(1585-1587)cCg>cTg   |
| T |              |                        |
| T |              |                        |
| T |              |                        |
| A | c.755C>T     | c.(754-756)tCt>tTt     |
| T | c.1021C>T    | c.(1021-1023)Cct>Tct   |
| T | c.1003G>A    | c.(1003-1005)Gag>Aag   |
| T | c.2191G>A    | c.(2191-2193)Gga>Aga   |
| A | c.5094G>A    | c.(5092-5094)gaG>gaA   |
| A | c.985_splice | c.e13+1                |
| A | c.609G>A     | c.(607-609)caG>caA     |
| A |              |                        |
| T | c.826G>A     | c.(826-828)Gag>Aag     |
| A | c.2721G>A    | c.(2719-2721)ggG>ggA   |
| A | c.1355A>T    | c.(1354-1356)aAa>aTa   |
| A | c.99C>T      | c.(97-99)ttC>ttT       |
| T | c.512G>A     | c.(511-513)gGa>gAa     |
| A | c.138C>T     | c.(136-138)tcC>tcT     |
| T | c.2744C>T    | c.(2743-2745)cCa>cTa   |
| A | c.2051C>T    | c.(2050-2052)tCt>tTt   |
| T | c.300C>T     | c.(298-300)atC>atT     |
| G | c.942A>G     | c.(940-942)ggA>ggG     |
| T | c.18100C>A   | c.(18100-18102)Cag>Aag |
| T | c.1699C>T    | c.(1699-1701)Ctg>Ttg   |
| T | c.1024C>T    | c.(1024-1026)Ccc>Tcc   |
| A | c.1715C>T    | c.(1714-1716)tCa>tTa   |
| A | c.600C>T     | c.(598-600)ttC>ttT     |
| A | c.84G>A      | c.(82-84)agG>agA       |
| A | c.105G>A     | c.(103-105)gaG>gaA     |
| A | c.332C>T     | c.(331-333)tCg>tTg     |
| T | c.1497G>A    | c.(1495-1497)agG>agA   |
| A | c.46C>T      | c.(46-48)Cgc>Tgc       |
| T | c.1876C>T    | c.(1876-1878)Cag>Tag   |
| T | c.1564C>T    | c.(1564-1566)Ccg>Tcg   |
| A | c.1116C>T    | c.(1114-1116)ttC>ttT   |
| T | c.538_splice | c.e7-1                 |
| T | c.4G>A       | c.(4-6)Gat>Aat         |
| T | c.140C>T     | c.(139-141)cCt>cTt     |

|    |                    |                          |
|----|--------------------|--------------------------|
| T  | c.2034G>A          | c.(2032-2034)ggG>ggA     |
| T  | c.961C>T           | c.(961-963)Cat>Tat       |
| T  | c.4835G>A          | c.(4834-4836)tGg>tAg     |
| T  | c.352C>T           | c.(352-354)Cga>Tga       |
| T  | c.9175G>A          | c.(9175-9177)Gaa>Aaa     |
| T  | c.288G>A           | c.(286-288)atG>atA       |
| G  |                    |                          |
| A  | c.2792G>A          | c.(2791-2793)gGa>gAa     |
| T  | c.1881C>T          | c.(1879-1881)gcC>gcT     |
| A  | c.3576G>A          | c.(3574-3576)ggG>ggA     |
| T  | c.3101G>A          | c.(3100-3102)gGg>gAg     |
| A  | c.999G>A           | c.(997-999)ggG>ggA       |
| A  | c.1143C>T          | c.(1141-1143)gcC>gcT     |
| T  | c.3378G>A          | c.(3376-3378)agG>agA     |
| T  | c.890C>T           | c.(889-891)tCc>tTc       |
| T  |                    |                          |
| T  | c.938C>T           | c.(937-939)tCa>tTa       |
| T  | c.408C>T           | c.(406-408)atC>atT       |
| T  | c.1341G>A          | c.(1339-1341)gtG>gtA     |
| A  | c.1872C>T          | c.(1870-1872)acC>acT     |
| G  | c.1169T>C          | c.(1168-1170)aTg>aCg     |
| T  | c.2944G>A          | c.(2944-2946)Gaa>Aaa     |
| T  | c.275C>T           | c.(274-276)tCc>tTc       |
| A  | c.3867G>A          | c.(3865-3867)ctG>ctA     |
| T  | c.1836C>T          |                          |
| -  | c.270_275delCACCTC | c.(268-276)atcacctcc>atc |
| CC | c.381_382insGG     | c.(379-384)aggatgfs      |
| C  | c.9057_9058insC    | c.(9055-9060)gctcccfS    |
| -  | c.4729delA         | c.(4729-4731)accfs       |
| A  |                    |                          |
| T  | c.754G>A           | c.(754-756)Gga>Aga       |
| A  | c.1258G>A          | c.(1258-1260)Gat>Aat     |
| A  | c.1165C>T          | c.(1165-1167)Cgt>Tgt     |
| A  | c.281C>T           | c.(280-282)tCt>tTt       |
| T  | c.845C>T           | c.(844-846)cCa>cTa       |
| T  | c.1533C>T          | c.(1531-1533)ttC>ttT     |
| A  | c.729C>T           | c.(727-729)gtC>gtT       |
| T  |                    |                          |
| A  | c.495C>T           | c.(493-495)ctC>ctT       |
| C  | c.228G>C           | c.(226-228)gcG>gcC       |
| A  |                    |                          |
| A  | c.879C>T           | c.(877-879)ctC>ctT       |
| T  | c.4671G>A          | c.(4669-4671)agG>agA     |

|   |            |                        |
|---|------------|------------------------|
| T | c.943G>A   | c.(943-945)Gaa>Aaa     |
| T |            |                        |
| T | c.279C>T   | c.(277-279)ttC>ttT     |
| T |            |                        |
| A |            |                        |
| T | c.30G>A    | c.(28-30)ggG>ggA       |
| T | c.547C>T   | c.(547-549)Ctt>Ttt     |
| T |            |                        |
| G | c.6141T>C  | c.(6139-6141)ttT>ttC   |
| T |            |                        |
| A | c.990T>A   | c.(988-990)taT>taA     |
| A | c.289C>T   | c.(289-291)Cga>Tga     |
| T | c.884G>A   | c.(883-885)aGc>aAc     |
| T | c.308C>T   | c.(307-309)cCt>cTt     |
| T | c.2002G>A  |                        |
| A |            |                        |
| C | c.3332T>C  | c.(3331-3333)gTt>gCt   |
| T | c.121C>T   | c.(121-123)Cca>Tca     |
| T | c.2013C>T  | c.(2011-2013)ttC>ttT   |
| T | c.2727C>T  | c.(2725-2727)tcC>tcT   |
| A | c.423C>T   | c.(421-423)atC>atT     |
| T | c.1067C>T  | c.(1066-1068)gCt>gTt   |
| T | c.753C>T   | c.(751-753)ttC>ttT     |
| T | c.25641G>A | c.(25639-25641)agG>agA |
| C | c.1268T>G  | c.(1267-1269)gTc>gGc   |
| A |            |                        |
| A | c.2669G>A  | c.(2668-2670)tGa>tAa   |
| A | c.606G>A   | c.(604-606)ggG>ggA     |
| A | c.94G>A    | c.(94-96)Gag>Aag       |
| G | c.434T>G   | c.(433-435)cTc>cGc     |
| T | c.1051C>A  | c.(1051-1053)Ctt>Att   |
| A | c.754G>A   | c.(754-756)Ggg>Agg     |
| C | c.3625C>G  | c.(3625-3627)Ccc>Gcc   |
| T | c.681C>T   | c.(679-681)tcC>tcT     |
| T | c.612C>T   | c.(610-612)gcC>gcT     |
| T | c.947G>A   | c.(946-948)tGg>tAg     |
| T | c.461G>A   | c.(460-462)gGa>gAa     |
| C | c.650A>G   | c.(649-651)gAc>gGc     |
| A |            |                        |
| T | c.6491C>T  | c.(6490-6492)aCc>aTc   |
| G | c.315A>G   | c.(313-315)caA>caG     |
| A | c.124G>A   | c.(124-126)Gaa>Aaa     |

|   |                |                      |
|---|----------------|----------------------|
| T | c.302C>T       | c.(301-303)cCc>cTc   |
| T | c.1882C>T      | c.(1882-1884)Cct>Tct |
| T | c.7434G>A      | c.(7432-7434)ggG>ggA |
| T | c.257G>A       | c.(256-258)tGg>tAg   |
| T | c.1608G>A      | c.(1606-1608)cgG>cgA |
| T |                |                      |
| T | c.1654G>A      | c.(1654-1656)Gtg>Atg |
| T | c.349G>A       | c.(349-351)Gaa>Aaa   |
| A | c.177C>T       | c.(175-177)taC>taT   |
| A | c.503G>A       | c.(502-504)aGa>aAa   |
| T | c.1165C>T      |                      |
| A |                |                      |
| T | c.60C>T        | c.(58-60)tcC>tcT     |
| T |                |                      |
| T | c.2101G>A      | c.(2101-2103)Gct>Act |
| A |                |                      |
| A | c.641C>T       | c.(640-642)tCa>tTa   |
| T | c.1560G>A      | c.(1558-1560)agG>agA |
| T | c.920C>T       | c.(919-921)cCc>cTc   |
| A |                |                      |
| T |                |                      |
| A |                |                      |
| A | c.176G>A       | c.(175-177)aGt>aAt   |
| G | c.1124T>C      | c.(1123-1125)aTa>aCa |
| A | c.865G>A       | c.(865-867)Gaa>Aaa   |
| A | c.7331C>T      | c.(7330-7332)cCt>cTt |
| A | c.303G>A       | c.(301-303)tgG>tgA   |
| T | c.2257C>T      | c.(2257-2259)Caa>Taa |
| T |                |                      |
| T | c.49C>T        | c.(49-51)Cca>Tca     |
| T | c.1056G>A      | c.(1054-1056)cgG>cgA |
| G | c.12230_splice | c.e77-1              |
| A | c.829G>A       | c.(829-831)Gag>Aag   |
| T |                |                      |
| C | c.384T>G       | c.(382-384)taT>taG   |
| A | c.16G>A        | c.(16-18)Gag>Aag     |
| A | c.796C>T       | c.(796-798)Cca>Tca   |
| A | c.752C>T       |                      |
| T | c.2181G>A      | c.(2179-2181)gtG>gtA |
| A | c.3049C>T      | c.(3049-3051)Ccc>Tcc |
| T | c.1166C>T      | c.(1165-1167)tCc>tTc |
| T | c.1800_splice  | c.e12-1              |
| T | c.166C>T       | c.(166-168)Cat>Tat   |

|   |               |                        |
|---|---------------|------------------------|
| T | c.1637G>A     | c.(1636-1638)gGc>gAc   |
| A | c.669G>A      | c.(667-669)aaG>aaA     |
| T | c.561C>T      | c.(559-561)gcC>gcT     |
| A | c.2093G>A     | c.(2092-2094)gGc>gAc   |
| A | c.678C>T      | c.(676-678)tcC>tcT     |
| A | c.15125C>T    | c.(15124-15126)tCc>tTc |
| T | c.1844C>T     | c.(1843-1845)cCc>cTc   |
| A |               |                        |
| A | c.63G>A       | c.(61-63)ggG>ggA       |
| T | c.1333C>T     | c.(1333-1335)Cat>Tat   |
| A | c.1117G>A     | c.(1117-1119)Gat>Aat   |
| T | c.195G>T      | c.(193-195)caG>caT     |
| A | c.425G>A      | c.(424-426)gGa>gAa     |
| A | c.477C>T      | c.(475-477)ccC>ccT     |
| T |               |                        |
| T | c.2488C>T     | c.(2488-2490)Cgg>Tgg   |
| A | c.6655C>T     | c.(6655-6657)Ccg>Tcg   |
| A | c.5122G>A     | c.(5122-5124)Gga>Aga   |
| A |               |                        |
| T | c.1211_splice | c.e8+1                 |
| T | c.55413G>A    | c.(55411-55413)aaG>aaA |
| T |               |                        |
| T |               |                        |
| A | c.849C>T      | c.(847-849)tcC>tcT     |
| A | c.657C>T      | c.(655-657)atC>atT     |
| A |               |                        |
| A | c.591C>T      | c.(589-591)ttC>ttT     |
| T |               |                        |
| A |               |                        |
| T |               |                        |
| A | c.467G>A      | c.(466-468)cGa>cAa     |
| T | c.3002G>A     | c.(3001-3003)tGg>tAg   |
| T | c.2450C>T     | c.(2449-2451)cCc>cTc   |
| T | c.4001C>T     | c.(4000-4002)tCg>tTg   |
| T | c.575C>T      | c.(574-576)tCt>tTt     |
| T | c.1322C>T     | c.(1321-1323)tCc>tTc   |
| T | c.17704G>A    | c.(17704-17706)Gag>Aag |
| A | c.268G>A      | c.(268-270)Gag>Aag     |
| A | c.252C>T      | c.(250-252)atC>atT     |
| A | c.52C>T       | c.(52-54)Ctg>Ttg       |
| T | c.464_splice  | c.e4-1                 |
| T |               |                        |
| A | c.2775C>T     | c.(2773-2775)atC>atT   |

|   |               |                        |
|---|---------------|------------------------|
| T | c.2389G>A     | c.(2389-2391)Gaa>Aaa   |
| C |               |                        |
| A | c.608G>A      | c.(607-609)gGa>gAa     |
| T |               |                        |
| T |               |                        |
| A | c.584G>A      | c.(583-585)gGa>gAa     |
| T |               |                        |
| A | c.436G>A      | c.(436-438)Gat>Aat     |
| A |               |                        |
| T | c.1877C>T     | c.(1876-1878)cCt>cTt   |
| T | c.486G>A      | c.(484-486)gcG>gcA     |
| T | c.2974C>T     | c.(2974-2976)Cac>Tac   |
| G | c.1240T>C     | c.(1240-1242)Tta>Cta   |
| A | c.5076C>T     | c.(5074-5076)agC>agT   |
| A | c.1306G>A     | c.(1306-1308)Gat>Aat   |
| A | c.1731C>T     | c.(1729-1731)ttC>ttT   |
| A | c.1444T>A     | c.(1444-1446)Ttc>Atc   |
| A | c.3951C>T     | c.(3949-3951)tcC>tcT   |
| A | c.256C>T      | c.(256-258)Ccc>Tcc     |
| A | c.40C>T       | c.(40-42)Cgc>Tgc       |
| T | c.328C>T      | c.(328-330)Cct>Tct     |
| A | c.592G>A      | c.(592-594)Gat>Aat     |
| A | c.1406C>T     | c.(1405-1407)cCa>cTa   |
| A |               |                        |
| A |               |                        |
| A | c.760G>A      | c.(760-762)Gat>Aat     |
| T | c.392G>A      | c.(391-393)gGa>gAa     |
| A |               |                        |
| T | c.184G>A      | c.(184-186)Gga>Aga     |
| C | c.1888A>C     | c.(1888-1890)Atg>Ctg   |
| A | c.888C>T      | c.(886-888)tcC>tcT     |
| C | c.910A>G      | c.(910-912)Aag>Gag     |
| A | c.595C>T      | c.(595-597)Cga>Tga     |
| T | c.12570C>T    | c.(12568-12570)ctC>ctT |
| A | c.3316C>T     | c.(3316-3318)Cac>Tac   |
| G |               |                        |
| A |               |                        |
| T | c.136C>T      | c.(136-138)Ccc>Tcc     |
| A | c.574C>T      | c.(574-576)Cta>Tta     |
| A |               |                        |
| T | c.370G>A      | c.(370-372)Gac>Aac     |
| A | c.16G>A       |                        |
| T | c.1519_splice | c.e8+1                 |



|   |              |                      |
|---|--------------|----------------------|
| A |              |                      |
| A | c.913G>A     | c.(913-915)Ggc>Agc   |
| T | c.229G>A     | c.(229-231)Gaa>Aaa   |
| A | c.1131G>A    | c.(1129-1131)agG>agA |
| A | c.1390C>T    | c.(1390-1392)Cga>Tga |
| A | c.996G>A     | c.(994-996)cgG>cgA   |
| T | c.6705G>A    | c.(6703-6705)ggG>ggA |
| A | c.53C>T      | c.(52-54)tCt>tTt     |
| T |              |                      |
| A | c.580G>A     | c.(580-582)Gat>Aat   |
| T | c.2940G>A    | c.(2938-2940)ctG>ctA |
| A | c.1677G>A    | c.(1675-1677)tgG>tgA |
| A | c.840C>T     | c.(838-840)atC>atT   |
| G | c.884C>G     |                      |
| A | c.6567C>T    | c.(6565-6567)acC>acT |
| T |              |                      |
| T | c.661C>T     | c.(661-663)Ctc>Ttc   |
| T | c.2216G>A    | c.(2215-2217)gGa>gAa |
| A | c.932C>T     | c.(931-933)gCc>gTc   |
| T | c.484C>T     | c.(484-486)Ctg>Ttg   |
| A | c.132C>T     | c.(130-132)gtC>gtT   |
| A | c.1577G>A    | c.(1576-1578)aGg>aAg |
| A | c.159G>A     | c.(157-159)agG>agA   |
| T | c.1397C>T    | c.(1396-1398)cCt>cTt |
| A | c.1038C>T    | c.(1036-1038)tcC>tcT |
| A |              |                      |
| C | c.1462T>C    | c.(1462-1464)Ttt>Ctt |
| A | c.1216C>T    | c.(1216-1218)Cgg>Tgg |
| A | c.1008C>T    | c.(1006-1008)atC>atT |
| T |              |                      |
| T | c.2054C>T    | c.(2053-2055)tCc>tTc |
| A | c.2137G>A    | c.(2137-2139)Gag>Aag |
| T | c.1001G>A    | c.(1000-1002)aGc>aAc |
| A | c.1292G>A    | c.(1291-1293)tGt>tAt |
| A |              |                      |
| C | c.1243A>G    | c.(1243-1245)Ata>Gta |
| A | c.1251C>T    | c.(1249-1251)ttC>ttT |
| T | c.460G>A     | c.(460-462)Gga>Aga   |
| C | c.-41_splice | c.e2-1               |
| C |              |                      |
| A | c.1844C>T    | c.(1843-1845)cCc>cTc |
| A | c.349C>T     | c.(349-351)Ctt>Ttt   |
| T | c.1801C>T    | c.(1801-1803)Ctc>Ttc |

|   |           |                      |
|---|-----------|----------------------|
| A | c.2792G>A | c.(2791-2793)gGa>gAa |
| A | c.387C>T  | c.(385-387)atC>atT   |
| T | c.2121C>T | c.(2119-2121)ttC>ttT |
| T | c.472G>A  | c.(472-474)Gcc>Acc   |
| T | c.1435G>A | c.(1435-1437)Gag>Aag |
| T |           |                      |
| T | c.1916C>T | c.(1915-1917)tCg>tTg |
| T | c.824G>A  | c.(823-825)gGa>gAa   |
| A | c.483G>A  | c.(481-483)caG>caA   |
| A | c.1237G>T | c.(1237-1239)Gct>Tct |
| T |           |                      |
| T |           |                      |
| T | c.466C>T  | c.(466-468)Ctt>Ttt   |
| A | c.1476C>T | c.(1474-1476)ctC>ctT |
| T |           |                      |
| A | c.298C>T  | c.(298-300)Ccc>Tcc   |
| A |           |                      |
| A | c.742G>A  | c.(742-744)Gat>Aat   |
| A | c.2647C>T | c.(2647-2649)Cct>Tct |
| T | c.228G>A  | c.(226-228)atG>atA   |
| C | c.4449C>G | c.(4447-4449)ctC>ctG |
| A | c.2793C>T | c.(2791-2793)atC>atT |
| A | c.1437C>T | c.(1435-1437)tcC>tcT |
| A |           |                      |
| A |           |                      |
| T | c.1998G>A | c.(1996-1998)ctG>ctA |
| T | c.2427G>A | c.(2425-2427)gaG>gaA |
| T |           |                      |
| A | c.1108C>T | c.(1108-1110)Cag>Tag |
| T | c.2941G>A | c.(2941-2943)Gtg>Atg |
| A | c.2151C>T | c.(2149-2151)ctC>ctT |
| T |           |                      |
| T |           |                      |
| T | c.3208C>T | c.(3208-3210)Cca>Tca |
| A | c.2617G>A | c.(2617-2619)Gac>Aac |
| A |           |                      |
| A |           |                      |
| A | c.987G>A  | c.(985-987)agG>agA   |
| A | c.100G>A  | c.(100-102)Gaa>Aaa   |
| T | c.3310G>A | c.(3310-3312)Gag>Aag |
| T | c.1074C>T | c.(1072-1074)ccC>ccT |
| A | c.13G>A   | c.(13-15)Gag>Aag     |
| T | c.81G>A   | c.(79-81)atG>atA     |

|   |            |                        |
|---|------------|------------------------|
| A | c.529A>T   | c.(529-531)Aac>Tac     |
| A | c.868C>T   | c.(868-870)Cct>Tct     |
| T | c.330G>A   | c.(328-330)ctG>ctA     |
| T | c.1812C>T  | c.(1810-1812)tcC>tcT   |
| A | c.559C>T   | c.(559-561)Cct>Tct     |
| A |            |                        |
| A | c.968G>A   | c.(967-969)aGg>aAg     |
| A | c.1870C>T  | c.(1870-1872)Ccc>Tcc   |
| A | c.3879C>T  | c.(3877-3879)gtC>gtT   |
| T | c.109C>T   | c.(109-111)Ccc>Tcc     |
| A | c.426C>T   |                        |
| A | c.12010C>T | c.(12010-12012)Ccg>Tcg |
| T | c.963C>T   | c.(961-963)ctC>ctT     |
| A | c.481C>T   | c.(481-483)Ctt>Ttt     |
| T | c.444C>T   | c.(442-444)atC>atT     |
| T | c.20C>T    | c.(19-21)cCc>cTc       |
| A |            |                        |
| T | c.1162G>A  | c.(1162-1164)Gag>Aag   |
| A | c.1475C>A  | c.(1474-1476)cCa>cAa   |
| T |            |                        |
| T | c.370G>A   | c.(370-372)Gat>Aat     |
| A | c.1066G>A  | c.(1066-1068)Gaa>Aaa   |
| T | c.241G>A   | c.(241-243)Gat>Aat     |
| A | c.1786C>T  | c.(1786-1788)Cct>Tct   |
| T | c.80G>A    | c.(79-81)cGg>cAg       |
| A | c.34G>A    | c.(34-36)Gaa>Aaa       |
| C | c.3653T>G  | c.(3652-3654)aTt>aGt   |
| A |            |                        |
| T | c.13G>A    | c.(13-15)Gag>Aag       |
| A | c.999C>T   | c.(997-999)ttC>ttT     |
| T | c.440G>A   | c.(439-441)gGa>gAa     |
| T | c.156C>T   | c.(154-156)ttC>ttT     |
| C |            |                        |
| A | c.70C>T    | c.(70-72)Cct>Tct       |
| T | c.694C>T   | c.(694-696)Cac>Tac     |
| A |            |                        |
| T | c.255C>T   | c.(253-255)tcC>tcT     |
| A |            |                        |
| T | c.618G>A   | c.(616-618)ctG>ctA     |
| T | c.1921G>A  | c.(1921-1923)Gaa>Aaa   |
| T | c.5101G>A  | c.(5101-5103)Gag>Aag   |
| G | c.1103A>G  | c.(1102-1104)aAa>aGa   |

|   |            |                        |
|---|------------|------------------------|
| A | c.1933C>T  | c.(1933-1935)Cgt>Tgt   |
| T | c.1060G>A  | c.(1060-1062)Gag>Aag   |
| T | c.34506G>A | c.(34504-34506)caG>caA |
| T |            |                        |
| A | c.430G>A   | c.(430-432)Gaa>Aaa     |
| T | c.807A>T   | c.(805-807)ttA>ttT     |
| T | c.4884G>A  | c.(4882-4884)aaG>aaA   |
| A | c.2000C>T  | c.(1999-2001)tCc>tTc   |
| T |            |                        |
| A | c.1011G>A  | c.(1009-1011)gtG>gtA   |
| A | c.407C>T   | c.(406-408)tCc>tTc     |
| T | c.1268C>T  | c.(1267-1269)tCc>tTc   |
| T | c.456C>T   | c.(454-456)ccC>ccT     |
| T | c.706C>T   | c.(706-708)Cca>Tca     |
| A | c.57G>A    | c.(55-57)ctG>ctA       |
| T | c.3778G>A  | c.(3778-3780)Gtt>Att   |
| A |            |                        |
| A | c.749C>T   |                        |
| A | c.458A>T   | c.(457-459)tAt>tTt     |
| A | c.244C>T   | c.(244-246)Ccc>Tcc     |
| T | c.2273C>T  | c.(2272-2274)tCc>tTc   |
| A | c.964G>A   | c.(964-966)Gcc>Acc     |
| A | c.1718G>A  | c.(1717-1719)aGa>aAa   |
| A |            |                        |
| T |            |                        |
| A | c.872G>A   | c.(871-873)gGa>gAa     |
| C | c.3084A>G  | c.(3082-3084)ggA>ggG   |
| T |            |                        |
| A | c.1036C>T  | c.(1036-1038)Ccg>Tcg   |
| C | c.203T>G   | c.(202-204)cTt>cGt     |
| T | c.2041C>T  | c.(2041-2043)Ccg>Tcg   |
| C | c.12514T>C | c.(12514-12516)Tca>Cca |
| A | c.2344G>A  | c.(2344-2346)Gga>Aga   |
| T | c.656T>A   |                        |
| T | c.108C>T   | c.(106-108)ccC>ccT     |
| T |            |                        |
| T | c.1559G>A  | c.(1558-1560)cGg>cAg   |
| A |            |                        |
| T | c.1684G>A  | c.(1684-1686)Ggt>Agt   |
| A | c.1589C>T  | c.(1588-1590)cCc>cTc   |
| A | c.1005C>T  | c.(1003-1005)ctC>ctT   |
| A | c.7374C>T  |                        |
| T | c.2230G>A  | c.(2230-2232)Gac>Aac   |

|   |            |                      |
|---|------------|----------------------|
| A | c.2389C>T  | c.(2389-2391)Cca>Tca |
| C | c.1751A>G  | c.(1750-1752)cAc>cGc |
| T |            |                      |
| A | c.2291C>T  | c.(2290-2292)tCg>tTg |
| A | c.251G>A   |                      |
| A | c.517G>A   | c.(517-519)Gac>Aac   |
| A | c.2568C>T  |                      |
| A | c.917G>A   | c.(916-918)cGt>cAt   |
| T | c.2424C>T  |                      |
| T | c.2446G>A  | c.(2446-2448)Gga>Aga |
| A |            |                      |
| A | c.306C>T   | c.(304-306)tgC>tgT   |
| G |            |                      |
| T | c.7332C>T  | c.(7330-7332)acC>acT |
| T |            |                      |
| T | c.10208G>A |                      |
| T | c.342G>A   | c.(340-342)atG>atA   |
| A |            |                      |
| T | c.1735G>A  | c.(1735-1737)Ggg>Agg |
| T | c.2500C>T  | c.(2500-2502)Cgc>Tgc |
| T | c.1433C>T  | c.(1432-1434)aCc>aTc |
| T | c.53C>T    | c.(52-54)tCc>tTc     |
| A |            |                      |
| A |            |                      |
| A | c.137G>A   | c.(136-138)gGg>gAg   |
| A | c.674C>T   | c.(673-675)cCc>cTc   |
| T | c.285C>T   | c.(283-285)ccC>ccT   |
| T | c.654A>T   | c.(652-654)gaA>gaT   |
| A | c.473C>T   | c.(472-474)cCt>cTt   |
| T |            |                      |
| T | c.368G>A   | c.(367-369)gGa>gAa   |
| A | c.1461G>A  | c.(1459-1461)gcG>gcA |
| A |            |                      |
| T | c.812C>T   | c.(811-813)tCc>tTc   |
| A | c.316A>T   | c.(316-318)Aag>Tag   |
| A | c.1757C>T  | c.(1756-1758)tCt>tTt |
| A | c.1465G>A  | c.(1465-1467)Gat>Aat |
| T |            |                      |
| T | c.356G>A   | c.(355-357)gGg>gAg   |
| A | c.771C>T   | c.(769-771)gcC>gcT   |
| A |            |                      |
| A | c.1439C>T  | c.(1438-1440)tCc>tTc |
| T |            |                      |

|   |               |                        |
|---|---------------|------------------------|
| A | c.811C>T      | c.(811-813)Cat>Tat     |
| T |               |                        |
| A |               |                        |
| A |               |                        |
| T |               |                        |
| T | c.156C>T      | c.(154-156)acC>acT     |
| C |               |                        |
| T | c.541C>T      | c.(541-543)Ctg>Ttg     |
| T | c.2697C>T     | c.(2695-2697)ggC>ggT   |
| T | c.1504C>T     | c.(1504-1506)Ctc>Ttc   |
| T | c.587C>T      | c.(586-588)tCt>tTt     |
| T |               |                        |
| T | c.12869C>T    | c.(12868-12870)cCc>cTc |
| A | c.198G>A      | c.(196-198)agG>agA     |
| A | c.1149C>T     | c.(1147-1149)ccC>ccT   |
| T | c.34499G>A    | c.(34498-34500)aGg>aAg |
| A | c.2934G>A     | c.(2932-2934)tcG>tcA   |
| A | c.987C>T      | c.(985-987)gcC>gcT     |
| T | c.259T>A      | c.(259-261)Ttc>Atc     |
| A | c.207C>T      | c.(205-207)ggC>ggT     |
| T | c.1502_splice | c.e14-1                |
| T | c.6420C>T     | c.(6418-6420)tcC>tcT   |
| T | c.867G>A      | c.(865-867)agG>agA     |
| T | c.1545C>T     | c.(1543-1545)ctC>ctT   |
| A | c.3403C>T     | c.(3403-3405)Cga>Tga   |
| T |               |                        |
| A | c.33C>T       | c.(31-33)atC>atT       |
| T | c.572G>A      | c.(571-573)cGa>cAa     |
| T |               |                        |
| A | c.723G>A      | c.(721-723)aaG>aaA     |
| A |               |                        |
| T | c.887C>T      | c.(886-888)aCg>aTg     |
| T | c.2695C>T     | c.(2695-2697)Ctt>Ttt   |
| T | c.-86_splice  | c.e1-1                 |
| T | c.968C>T      | c.(967-969)cCc>cTc     |
| A | c.793C>T      | c.(793-795)Cat>Tat     |
| T | c.1446G>A     | c.(1444-1446)gaG>gaA   |
| A | c.1334C>T     | c.(1333-1335)cCt>cTt   |
| A | c.952C>T      | c.(952-954)Cct>Tct     |
| T | c.1215C>T     | c.(1213-1215)tcC>tcT   |
| T | c.247G>A      | c.(247-249)Gga>Aga     |
| C | c.303G>C      | c.(301-303)caG>caC     |
| G | c.255T>C      | c.(253-255)tcT>tcC     |

|   |              |                        |
|---|--------------|------------------------|
| T | c.3715C>T    | c.(3715-3717)Ccc>Tcc   |
| T | c.1464G>A    | c.(1462-1464)agG>agA   |
| A | c.344G>A     | c.(343-345)gGc>gAc     |
| A |              |                        |
| G | c.1890T>G    | c.(1888-1890)aaT>aaG   |
| A | c.908C>T     | c.(907-909)gCt>gTt     |
| A | c.5155C>T    | c.(5155-5157)Caa>Taa   |
| T | c.3316G>A    | c.(3316-3318)Gaa>Aaa   |
| T | c.6900C>T    | c.(6898-6900)ccC>ccT   |
| T |              |                        |
| A |              |                        |
| T | c.16G>A      | c.(16-18)Gag>Aag       |
| A | c.462G>A     | c.(460-462)agG>agA     |
| A | c.166G>A     | c.(166-168)Ggc>Agc     |
| A | c.225G>A     |                        |
| T | c.2030C>T    | c.(2029-2031)tCc>tTc   |
| A |              |                        |
| A | c.60G>A      | c.(58-60)agG>agA       |
| T | c.1213G>A    | c.(1213-1215)Ggc>Agc   |
| T | c.800C>T     | c.(799-801)tCc>tTc     |
| T | c.620C>T     | c.(619-621)tCg>tTg     |
| A |              |                        |
| T | c.414G>A     | c.(412-414)atG>atA     |
| A | c.986G>A     | c.(985-987)gGa>gAa     |
| A | c.2198C>T    | c.(2197-2199)tCc>tTc   |
| A |              |                        |
| A | c.1475G>A    | c.(1474-1476)gGa>gAa   |
| A |              |                        |
| T | c.1032G>A    | c.(1030-1032)gcG>gcA   |
| A |              |                        |
| T | c.182C>T     | c.(181-183)aCc>aTc     |
| A | c.2763G>A    | c.(2761-2763)atG>atA   |
| T | c.219C>T     | c.(217-219)ttC>ttT     |
| A | c.533A>T     | c.(532-534)aAt>aTt     |
| A | c.445C>T     | c.(445-447)Cag>Tag     |
| T | c.871G>A     | c.(871-873)Gat>Aat     |
| A | c.3667G>T    | c.(3667-3669)Gcc>Tcc   |
| T |              |                        |
| A |              |                        |
| A | c.46G>A      | c.(46-48)Gcc>Acc       |
| T | c.614_splice | c.e6-1                 |
| T | c.32039G>A   | c.(32038-32040)aGa>aAa |
| A | c.961C>T     | c.(961-963)Cct>Tct     |

|   |           |                      |
|---|-----------|----------------------|
| A | c.2876C>T | c.(2875-2877)tCt>tTt |
| A | c.666C>T  | c.(664-666)tcC>tcT   |
| A |           |                      |
| A | c.1979C>T | c.(1978-1980)aCc>aTc |
| T |           |                      |
| A | c.1615C>T | c.(1615-1617)Cca>Tca |
| T |           |                      |
| A | c.196C>T  |                      |
| A | c.1861C>T | c.(1861-1863)Cct>Tct |
| A | c.1462T>A | c.(1462-1464)Tcc>Acc |
| G | c.307A>C  | c.(307-309)Agc>Cgc   |
| A | c.718C>T  | c.(718-720)Cgt>Tgt   |
| A | c.3195C>T | c.(3193-3195)ttC>ttT |
| T | c.517G>A  | c.(517-519)Ggt>Agt   |
| T | c.1696G>A | c.(1696-1698)Gaa>Aaa |
| T | c.428G>A  | c.(427-429)cGa>cAa   |
| T |           |                      |
| A | c.1351G>A | c.(1351-1353)Gaa>Aaa |
| A | c.976G>A  | c.(976-978)Gag>Aag   |
| A | c.880G>A  | c.(880-882)Gga>Aga   |
| A | c.1425G>A | c.(1423-1425)cgG>cgA |
| A | c.1632G>A | c.(1630-1632)tgG>tgA |
| A | c.995G>A  | c.(994-996)cGg>cAg   |
| G | c.433T>C  | c.(433-435)Tta>Cta   |
| A | c.1046G>A | c.(1045-1047)gGa>gAa |
| T |           |                      |
| T | c.4301C>T | c.(4300-4302)cCc>cTc |
| A | c.1637G>A | c.(1636-1638)gGg>gAg |
| A | c.345C>T  | c.(343-345)ccC>ccT   |
| A | c.1298C>T | c.(1297-1299)cCc>cTc |
| T | c.1693G>A | c.(1693-1695)Gaa>Aaa |
| A | c.2011G>A | c.(2011-2013)Gaa>Aaa |
| T | c.793G>A  | c.(793-795)Gaa>Aaa   |
| T | c.1387C>T | c.(1387-1389)Ctt>Ttt |
| A | c.1078C>T | c.(1078-1080)Ctt>Ttt |
| A | c.712G>A  | c.(712-714)Gac>Aac   |
| G | c.1470A>G | c.(1468-1470)gaA>gaG |
| A | c.7509C>T | c.(7507-7509)ttC>ttT |
| A | c.1510G>A | c.(1510-1512)Gag>Aag |
| A | c.368G>A  | c.(367-369)gGg>gAg   |
| A | c.1991T>A | c.(1990-1992)gTg>gAg |
| T | c.852C>T  | c.(850-852)ttC>ttT   |
| A | c.3150G>A | c.(3148-3150)cgG>cgA |



|   |              |                      |
|---|--------------|----------------------|
| T |              |                      |
| A | c.3481G>A    | c.(3481-3483)Gag>Aag |
| T | c.570C>T     | c.(568-570)atC>atT   |
| T | c.3749G>A    | c.(3748-3750)gGa>gAa |
| A | c.291G>A     | c.(289-291)ctG>ctA   |
| A | c.7257C>T    | c.(7255-7257)ttC>ttT |
| A | c.1353C>T    | c.(1351-1353)ccC>ccT |
| A |              |                      |
| T |              |                      |
| T |              |                      |
| T | c.4772C>T    | c.(4771-4773)cCt>cTt |
| A |              |                      |
| C | c.1059T>C    | c.(1057-1059)gtT>gtC |
| T | c.1132C>T    | c.(1132-1134)Ctc>Ttc |
| T | c.4629G>A    | c.(4627-4629)ggG>ggA |
| T | c.3024C>T    | c.(3022-3024)ttC>ttT |
| A | c.347C>T     | c.(346-348)tCt>tTt   |
| A | c.4954C>T    | c.(4954-4956)Cct>Tct |
| T | c.427C>T     | c.(427-429)Cga>Tga   |
| T | c.88C>T      | c.(88-90)Cct>Tct     |
| A |              |                      |
| A | c.107C>T     | c.(106-108)tCc>tTc   |
| T | c.517C>T     | c.(517-519)Cgg>Tgg   |
| A |              |                      |
| T | c.91G>A      | c.(91-93)Gag>Aag     |
| A |              |                      |
| A | c.16G>A      | c.(16-18)Gaa>Aaa     |
| A | c.600C>T     | c.(598-600)ttC>ttT   |
| C |              |                      |
| G | c.419T>C     | c.(418-420)gTt>gCt   |
| T | c.333G>T     | c.(331-333)ctG>ctT   |
| T |              |                      |
| A | c.841G>A     | c.(841-843)Gat>Aat   |
| T | c.592C>T     | c.(592-594)Ccc>Tcc   |
| A | c.4G>A       | c.(4-6)Gga>Aga       |
| A | c.848_splice | c.e4+1               |
| T | c.2171G>A    | c.(2170-2172)aGa>aAa |
| T | c.249G>A     | c.(247-249)gcG>gcA   |
| A | c.1397G>A    | c.(1396-1398)aGa>aAa |
| T | c.941C>T     | c.(940-942)gCc>gTc   |
| A | c.297C>T     | c.(295-297)acC>acT   |
| T |              |                      |
| A |              |                      |

|   |            |                        |
|---|------------|------------------------|
| A | c.304G>A   | c.(304-306)Ggg>Agg     |
| T | c.555G>A   | c.(553-555)gaG>gaA     |
| T |            |                        |
| T | c.164C>T   | c.(163-165)cCc>cTc     |
| A | c.1336C>T  | c.(1336-1338)Cct>Tct   |
| T | c.268C>T   | c.(268-270)Ccc>Tcc     |
| T | c.415C>T   | c.(415-417)Cag>Tag     |
| T | c.659G>A   | c.(658-660)gGc>gAc     |
| T | c.1493C>T  | c.(1492-1494)gCt>gTt   |
| A | c.1551C>T  | c.(1549-1551)ctC>ctT   |
| T | c.63G>A    | c.(61-63)gtG>gtA       |
| A | c.254C>T   | c.(253-255)tCg>tTg     |
| A | c.298G>A   | c.(298-300)Gcc>Acc     |
| A |            |                        |
| A | c.836G>A   | c.(835-837)gGc>gAc     |
| A | c.1863C>T  | c.(1861-1863)gcC>gcT   |
| T | c.3383G>A  | c.(3382-3384)gGg>gAg   |
| T | c.1067C>T  | c.(1066-1068)tCg>tTg   |
| T |            |                        |
| A | c.3492C>T  | c.(3490-3492)ctC>ctT   |
| A | c.2486C>T  | c.(2485-2487)gCc>gTc   |
| T | c.59C>T    | c.(58-60)tCc>tTc       |
| T |            |                        |
| A | c.2101C>T  | c.(2101-2103)Ctc>Ttc   |
| A | c.224G>A   | c.(223-225)gGg>gAg     |
| T | c.948G>A   | c.(946-948)tgG>tgA     |
| A | c.1806G>A  | c.(1804-1806)gaG>gaA   |
| A | c.685G>A   | c.(685-687)Gag>Aag     |
| T | c.1731C>T  | c.(1729-1731)tcC>tcT   |
| T | c.868G>A   | c.(868-870)Gag>Aag     |
| T | c.1146C>T  | c.(1144-1146)atC>atT   |
| T | c.270C>T   | c.(268-270)atC>atT     |
| T | c.1681G>A  | c.(1681-1683)Gga>Aga   |
| A | c.3798C>T  | c.(3796-3798)ttC>ttT   |
| A |            |                        |
| G | c.948C>G   | c.(946-948)gcC>gcG     |
| C | c.9606T>G  | c.(9604-9606)agT>agG   |
| A | c.98G>A    | c.(97-99)aGg>aAg       |
| T | c.41125G>A | c.(41125-41127)Gaa>Aaa |
| T |            |                        |
| T | c.504C>T   | c.(502-504)ttC>ttT     |
| T |            |                        |
| A | c.168C>T   | c.(166-168)tcC>tcT     |

|   |               |                        |
|---|---------------|------------------------|
| T | c.967C>T      | c.(967-969)Ccc>Tcc     |
| T | c.1775C>T     | c.(1774-1776)cCc>cTc   |
| A | c.24C>T       | c.(22-24)agC>agT       |
| T |               |                        |
| T |               |                        |
| A | c.3157C>A     | c.(3157-3159)Cag>Aag   |
| T | c.871C>T      | c.(871-873)Cct>Tct     |
| T | c.1570C>T     | c.(1570-1572)Cga>Tga   |
| T | c.2172G>A     | c.(2170-2172)ggG>ggA   |
| A | c.1631C>T     | c.(1630-1632)tCc>tTc   |
| T | c.1820A>T     | c.(1819-1821)cAg>cTg   |
| A | c.1432G>A     | c.(1432-1434)Gaa>Aaa   |
| T | c.1369C>T     | c.(1369-1371)Cag>Tag   |
| T | c.1228C>T     | c.(1228-1230)Cgg>Tgg   |
| T | c.117C>T      | c.(115-117)tcC>tcT     |
| A | c.439G>A      | c.(439-441)Gaa>Aaa     |
| T | c.10184C>T    | c.(10183-10185)tCg>tTg |
| T | c.1311G>A     | c.(1309-1311)tcG>tcA   |
| A |               |                        |
| A | c.6223G>A     | c.(6223-6225)Gga>Aga   |
| T | c.1518C>T     | c.(1516-1518)acC>acT   |
| A |               |                        |
| T | c.867G>A      | c.(865-867)aaG>aaA     |
| A | c.149C>T      | c.(148-150)tCt>tTt     |
| A | c.1990G>A     | c.(1990-1992)Gtg>Atg   |
| T | c.1056G>A     | c.(1054-1056)atG>atA   |
| T | c.225G>A      | c.(223-225)agG>agA     |
| A | c.1587G>A     | c.(1585-1587)ccG>ccA   |
| A |               |                        |
| T | c.513G>A      |                        |
| A | c.1261G>A     | c.(1261-1263)Gaa>Aaa   |
| A |               |                        |
| A | c.2853C>A     | c.(2851-2853)gcC>gcA   |
| A | c.462C>T      | c.(460-462)ttC>ttT     |
| A | c.1102_splice | c.e20-1                |
| T | c.3808G>A     | c.(3808-3810)Gat>Aat   |
| A |               |                        |
| A | c.1032C>T     | c.(1030-1032)atC>atT   |
| T | c.40435G>A    | c.(40435-40437)Gaa>Aaa |
| G | c.2859_splice | c.e27-1                |
| A | c.2112G>A     | c.(2110-2112)agG>agA   |
| T | c.341G>A      | c.(340-342)tGg>tAg     |
| A | c.322C>T      | c.(322-324)Ccc>Tcc     |

|   |              |                      |
|---|--------------|----------------------|
| A | c.440G>A     | c.(439-441)gGa>gAa   |
| T | c.354G>A     | c.(352-354)agG>agA   |
| G |              |                      |
| A | c.216C>T     | c.(214-216)atC>atT   |
| A | c.2164G>T    | c.(2164-2166)Gag>Tag |
| T |              |                      |
| A | c.2078C>T    | c.(2077-2079)tCg>tTg |
| A |              |                      |
| A | c.2115G>A    | c.(2113-2115)gaG>gaA |
| A | c.279G>A     | c.(277-279)atG>atA   |
| A | c.1063G>A    | c.(1063-1065)Gga>Aga |
| A | c.1676G>A    | c.(1675-1677)aGg>aAg |
| T | c.1334C>T    | c.(1333-1335)cCa>cTa |
| G | c.1471A>G    | c.(1471-1473)Aaa>Gaa |
| A |              |                      |
| G | c.1024A>G    | c.(1024-1026)Aaa>Gaa |
| A | c.1454C>T    | c.(1453-1455)gCt>gTt |
| A | c.1471G>A    | c.(1471-1473)Gag>Aag |
| T | c.877C>T     | c.(877-879)Cgt>Tgt   |
| T | c.680C>T     | c.(679-681)tCc>tTc   |
| T | c.1062C>T    | c.(1060-1062)ttC>ttT |
| G | c.37G>C      | c.(37-39)Ggt>Cgt     |
| T | c.902C>T     | c.(901-903)cCc>cTc   |
| T | c.1537G>A    | c.(1537-1539)Gaa>Aaa |
| A | c.8286C>T    | c.(8284-8286)ttC>ttT |
| A | c.879C>T     | c.(877-879)atC>atT   |
| T | c.130C>T     | c.(130-132)Cct>Tct   |
| T | c.2310G>A    | c.(2308-2310)acG>acA |
| T | c.211C>T     | c.(211-213)Cgg>Tgg   |
| T | c.765_splice | c.e13+1              |
| A | c.1707C>T    | c.(1705-1707)ttC>ttT |
| T | c.433C>T     | c.(433-435)Cga>Tga   |
| A | c.2863G>A    | c.(2863-2865)Gat>Aat |
| G | c.1007T>C    | c.(1006-1008)gTc>gCc |
| T | c.1150C>T    | c.(1150-1152)Cct>Tct |
| A | c.128A>T     | c.(127-129)aAt>aTt   |
| G |              |                      |
| T | c.1190C>T    | c.(1189-1191)cCg>cTg |
| C | c.983A>C     | c.(982-984)aAa>aCa   |
| T | c.6095C>T    | c.(6094-6096)cCc>cTc |
| A | c.5301G>A    | c.(5299-5301)atG>atA |
| T | c.3595G>A    | c.(3595-3597)Gac>Aac |
| T | c.1696G>A    | c.(1696-1698)Gaa>Aaa |

|   |                                                       |                           |
|---|-------------------------------------------------------|---------------------------|
| A | c.574G>A                                              | c.(574-576)Gaa>Aaa        |
| A | c.2514C>T                                             | c.(2512-2514)ttC>ttT      |
| T | c.516C>T                                              | c.(514-516)gcC>gcT        |
| T | c.4628G>A                                             | c.(4627-4629)gGg>gAg      |
| A | c.974G>A                                              | c.(973-975)cGa>cAa        |
| G | c.2987A>C                                             | c.(2986-2988)aAc>aCc      |
| T | c.2882C>T                                             | c.(2881-2883)cCt>cTt      |
| A | c.801C>T                                              | c.(799-801)ttC>ttT        |
| A | c.2399C>T                                             | c.(2398-2400)aCg>aTg      |
| T | c.1776T>A                                             | c.(1774-1776)gtT>gtA      |
| A | c.512G>A                                              | c.(511-513)aGc>aAc        |
| A | c.497G>A                                              | c.(496-498)gGa>gAa        |
| A | c.357C>A                                              | c.(355-357)gcC>gcA        |
| T |                                                       |                           |
| A | c.184G>A                                              | c.(184-186)Gtt>Att        |
| T | c.757C>T                                              | c.(757-759)Cgc>Tgc        |
| A | c.207G>A                                              | c.(205-207)atG>atA        |
| A |                                                       |                           |
| T | c.989A>T                                              | c.(988-990)tAt>tTt        |
| C |                                                       |                           |
| A | c.3977C>T                                             | c.(3976-3978)tCa>tTa      |
| A |                                                       |                           |
| - | c.912delT                                             | c.(910-912)cgtfs          |
| G | c.301_302insC                                         | c.(301-303)gaafs          |
| - | c.1520delC                                            | c.(1519-1521)tcafs        |
| - | c.2367delT                                            | c.(2365-2367)cctfs        |
| - | delGCTCAAATGCAAGATGC/3063)ctgctcaaatgcaagatgcatttcga  |                           |
| - | c.343_348delAAAGAC                                    | c.(343-348)aaagacdel      |
| A | c.501_502insA                                         | c.(499-504)agtaaafs       |
| - | c.372delC                                             | c.(370-372)ttcfs          |
| - | c.818_827delAAGTCGTCAC                                | c.(817-828)gaagtcgtcaccfs |
| - | c.575delC                                             | c.(574-576)tcafs          |
| - | 93_4907delAAAGCCATATTA(4891-4908)ttaaagccatattatgca>t |                           |
| - | c.2262_2268delAGACTAC                                 | c.(2260-2268)cgagactacfs  |
| - | c.259delG                                             | c.(259-261)gtgfs          |
| - | c.4212delA                                            | c.(4210-4212)atafs        |
| - | c.350_351delGC                                        | c.(349-351)cgcfcs         |
| C | c.1941T>C                                             | c.(1939-1941)atT>atC      |
| T | c.715G>A                                              | c.(715-717)Gga>Aga        |
| A | c.420C>T                                              | c.(418-420)ttC>ttT        |
| T | c.10563C>T                                            | c.(10561-10563)ctC>ctT    |
| T | c.2596G>A                                             | c.(2596-2598)Gaa>Aaa      |
| A | c.228G>A                                              | c.(226-228)ttG>ttA        |

|   |            |                        |
|---|------------|------------------------|
| A | c.668C>T   | c.(667-669)cCt>cTt     |
| A | c.1537G>A  | c.(1537-1539)Gga>Aga   |
| C | c.2416T>C  | c.(2416-2418)Ttc>Ctc   |
| T | c.397G>A   | c.(397-399)Gag>Aag     |
| A | c.3036G>A  | c.(3034-3036)aaG>aaA   |
| T | c.498C>T   | c.(496-498)ccC>ccT     |
| A |            |                        |
| T | c.5420G>A  | c.(5419-5421)gGa>gAa   |
| T | c.241C>T   | c.(241-243)Ctt>Ttt     |
| T | c.1913G>A  | c.(1912-1914)cGa>cAa   |
| A |            |                        |
| A | c.4471G>A  | c.(4471-4473)Gga>Aga   |
| A |            |                        |
| T | c.344C>T   | c.(343-345)cCg>cTg     |
| T | c.3738C>A  | c.(3736-3738)acC>acA   |
| T | c.1372C>T  | c.(1372-1374)Cct>Tct   |
| T |            |                        |
| T | c.1670C>T  | c.(1669-1671)gCc>gTc   |
| A |            |                        |
| T | c.1136C>T  | c.(1135-1137)tCt>tTt   |
| T | c.3154C>T  | c.(3154-3156)Ctc>Ttc   |
| A |            |                        |
| A | c.415C>T   | c.(415-417)Ccc>Tcc     |
| A | c.3168C>T  |                        |
| T | c.670C>T   | c.(670-672)Ccc>Tcc     |
| T | c.531G>A   | c.(529-531)gaG>gaA     |
| T | c.1970G>A  | c.(1969-1971)gGg>gAg   |
| T |            |                        |
| T | c.1705G>A  | c.(1705-1707)Ggt>Agt   |
| T | c.1325G>A  | c.(1324-1326)gGg>gAg   |
| A | c.1804G>A  | c.(1804-1806)Gaa>Aaa   |
| T | c.976G>A   | c.(976-978)Gac>Aac     |
| A | c.1826C>T  | c.(1825-1827)tCt>tTt   |
| T | c.908G>A   | c.(907-909)tGg>tAg     |
| T | c.1126C>T  | c.(1126-1128)Caa>Taa   |
| T | c.502G>A   | c.(502-504)Gaa>Aaa     |
| T | c.961G>A   | c.(961-963)Gtt>Att     |
| T | c.597G>A   | c.(595-597)caG>caA     |
| A | c.12224C>T | c.(12223-12225)tCa>tTa |
| T | c.243C>T   | c.(241-243)ttC>ttT     |
| A | c.282C>T   | c.(280-282)atC>atT     |
| T | c.4603C>T  | c.(4603-4605)Ccg>Tcg   |

|   |              |                        |
|---|--------------|------------------------|
| T | c.5917C>T    | c.(5917-5919)Cca>Tca   |
| A | c.322G>A     | c.(322-324)Gat>Aat     |
| T | c.1621G>A    | c.(1621-1623)Gaa>Aaa   |
| A |              |                        |
| A | c.562_splice | c.e4+1                 |
| T | c.4417G>A    | c.(4417-4419)Gat>Aat   |
| A | c.3813C>T    | c.(3811-3813)ctC>ctT   |
| A | c.1490G>A    | c.(1489-1491)gGa>gAa   |
| A | c.129G>A     | c.(127-129)agG>agA     |
| T | c.12C>T      | c.(10-12)gcC>gcT       |
| A | c.1580T>A    | c.(1579-1581)tTt>tAt   |
| T | c.705G>A     | c.(703-705)agG>agA     |
| A | c.363C>T     | c.(361-363)ttC>ttT     |
| T | c.5786C>T    | c.(5785-5787)tCc>tTc   |
| A | c.236C>T     | c.(235-237)tCt>tTt     |
| T | c.241C>T     | c.(241-243)Ctt>Ttt     |
| T | c.1430G>A    | c.(1429-1431)tGg>tAg   |
| A | c.1244G>A    | c.(1243-1245)cGg>cAg   |
| G | c.2428T>C    | c.(2428-2430)Ttc>Ctc   |
| T | c.596C>T     | c.(595-597)cCt>cTt     |
| A | c.64654C>T   | c.(64654-64656)Ctt>Ttt |
| A | c.1704C>T    | c.(1702-1704)ccC>ccT   |
| A | c.271G>A     | c.(271-273)Ggg>Agg     |
| A | c.140C>T     | c.(139-141)cCc>cTc     |
| A | c.2065G>A    | c.(2065-2067)Gaa>Aaa   |
| A | c.382C>T     | c.(382-384)Cgt>Tgt     |
| T | c.1389C>T    |                        |
| A |              |                        |
| T | c.1327G>A    | c.(1327-1329)Gga>Aga   |
| A | c.803C>T     | c.(802-804)tCc>tTc     |
| A | c.81C>T      | c.(79-81)caC>caT       |
| A | c.1129G>A    | c.(1129-1131)Gaa>Aaa   |
| T |              |                        |
| T | c.635G>A     | c.(634-636)gGc>gAc     |
| T | c.29G>A      | c.(28-30)gGg>gAg       |
| T | c.413C>T     | c.(412-414)tCt>tTt     |
| A | c.871G>A     | c.(871-873)Gaa>Aaa     |
| T | c.663C>T     | c.(661-663)atC>atT     |
| T | c.809G>A     | c.(808-810)gGa>gAa     |
| T | c.204C>T     | c.(202-204)ccC>ccT     |
| A | c.9333C>T    | c.(9331-9333)gtC>gtT   |
| T | c.827C>T     | c.(826-828)tCc>tTc     |
| T | c.526C>T     | c.(526-528)Ctc>Ttc     |

|   |               |                        |
|---|---------------|------------------------|
| A | c.1448C>T     | c.(1447-1449)gCc>gTc   |
| A | c.1385C>T     | c.(1384-1386)tCc>tTc   |
| T | c.2645G>A     | c.(2644-2646)gGa>gAa   |
| A | c.1941G>A     | c.(1939-1941)aaG>aaA   |
| A | c.808C>T      | c.(808-810)Ctc>Ttc     |
| A | c.615G>A      | c.(613-615)caG>caA     |
| T | c.174C>T      | c.(172-174)gtC>gtT     |
| A | c.1811A>T     | c.(1810-1812)aAa>aTa   |
| A | c.18949G>A    | c.(18949-18951)Gga>Aga |
| T | c.1581C>T     | c.(1579-1581)ttC>ttT   |
| A | c.521G>A      | c.(520-522)cGa>cAa     |
| T | c.3225C>T     | c.(3223-3225)ccC>ccT   |
| T | c.1217G>A     | c.(1216-1218)aGg>aAg   |
| A | c.1876C>T     | c.(1876-1878)Cct>Tct   |
| A |               |                        |
| A | c.2287_splice | c.e18-1                |
| T | c.6766C>T     | c.(6766-6768)Cat>Tat   |
| A | c.2289G>A     | c.(2287-2289)ctG>ctA   |
| A | c.1939C>T     | c.(1939-1941)Ccg>Tcg   |
| A | c.13545C>T    | c.(13543-13545)ttC>ttT |
| T |               |                        |
| T | c.538C>T      | c.(538-540)Cca>Tca     |
| T | c.1866G>A     | c.(1864-1866)gtG>gtA   |
| T | c.1114C>T     | c.(1114-1116)Cta>Tta   |
| A | c.261C>T      | c.(259-261)atC>atT     |
| A | c.797C>T      | c.(796-798)cCc>cTc     |
| T | c.240G>A      | c.(238-240)aaG>aaA     |
| T | c.151C>T      | c.(151-153)Cag>Tag     |
| A | c.263C>T      | c.(262-264)tCc>tTc     |
| A | c.1081C>T     | c.(1081-1083)Cct>Tct   |
| A | c.28G>A       | c.(28-30)Gat>Aat       |
| T | c.125_splice  | c.e1+1                 |
| T | c.1813G>A     | c.(1813-1815)Gaa>Aaa   |
| T | c.3002G>A     | c.(3001-3003)aGa>aAa   |
| T | c.118C>T      | c.(118-120)Cct>Tct     |
| A | c.1103G>A     | c.(1102-1104)aGa>aAa   |
| T |               |                        |
| A | c.1909G>A     | c.(1909-1911)Gaa>Aaa   |
| C |               |                        |
| T |               |                        |
| T | c.515C>T      | c.(514-516)cCg>cTg     |
| T |               |                        |
| T |               |                        |



|   |               |                      |
|---|---------------|----------------------|
| T | c.3098G>A     | c.(3097-3099)gGg>gAg |
| T |               |                      |
| A | c.1737G>A     | c.(1735-1737)ttG>ttA |
| T | c.1089G>A     | c.(1087-1089)aaG>aaA |
| A |               |                      |
| T | c.270C>T      | c.(268-270)atC>atT   |
| A |               |                      |
| G | c.1229T>C     | c.(1228-1230)tTg>tCg |
| T | c.3548_splice | c.e11-1              |
| A | c.1611G>A     | c.(1609-1611)gaG>gaA |
| A | c.720G>A      | c.(718-720)agG>agA   |
| A | c.1213G>A     | c.(1213-1215)Gaa>Aaa |
| T |               |                      |
| T | c.3G>A        | c.(1-3)atG>atA       |
| T | c.263C>T      | c.(262-264)cCt>cTt   |
| T | c.52C>T       | c.(52-54)Cat>Tat     |
| T | c.693G>A      | c.(691-693)caG>caA   |
| T | c.668G>A      | c.(667-669)gGa>gAa   |
| T | c.1306C>T     | c.(1306-1308)Cac>Tac |
| A | c.805C>T      | c.(805-807)Cgt>Tgt   |
| T |               |                      |
| A |               |                      |
| A | c.181C>T      | c.(181-183)Cga>Tga   |
| A | c.1798C>T     | c.(1798-1800)Cgc>Tgc |
| A | c.245C>T      | c.(244-246)tCt>tTt   |
| A | c.1722G>A     | c.(1720-1722)gaG>gaA |
| A | c.2511G>A     | c.(2509-2511)acG>acA |
| A | c.417G>A      |                      |
| T |               |                      |
| G | c.1569T>G     | c.(1567-1569)tgT>tgG |
| T | c.333G>A      | c.(331-333)gaG>gaA   |
| C | c.585T>G      | c.(583-585)atT>atG   |
| A | c.1869C>T     | c.(1867-1869)atC>atT |
| T |               |                      |
| T | c.2938C>T     | c.(2938-2940)Ccc>Tcc |
| T | c.8840C>T     | c.(8839-8841)cCc>cTc |
| T | c.4854G>A     | c.(4852-4854)agG>agA |
| A | c.961C>T      | c.(961-963)Cca>Tca   |
| T | c.338C>T      | c.(337-339)tCt>tTt   |
| A | c.367C>T      | c.(367-369)Cac>Tac   |
| A | c.765C>T      | c.(763-765)ttC>ttT   |
| T | c.1714C>T     | c.(1714-1716)Cct>Tct |
| A |               |                      |

|   |              |                      |
|---|--------------|----------------------|
| T | c.877C>T     | c.(877-879)Cgt>Tgt   |
| A | c.6351C>A    | c.(6349-6351)gcC>gcA |
| A | c.2015G>A    | c.(2014-2016)gGt>gAt |
| T | c.360C>T     | c.(358-360)tcC>tcT   |
| A | c.728G>A     | c.(727-729)cGa>cAa   |
| A | c.919C>T     | c.(919-921)Ctc>Ttc   |
| T |              |                      |
| A | c.1361C>T    | c.(1360-1362)gCc>gTc |
| T | c.5220C>T    | c.(5218-5220)ccC>ccT |
| C | c.423T>G     | c.(421-423)ccT>ccG   |
| T |              |                      |
| T | c.257G>A     | c.(256-258)gGa>gAa   |
| A | c.662G>A     | c.(661-663)aGa>aAa   |
| A | c.244G>A     | c.(244-246)Gag>Aag   |
| A | c.780C>T     | c.(778-780)ttC>ttT   |
| T | c.579C>T     | c.(577-579)atC>atT   |
| T | c.627C>T     | c.(625-627)ttC>ttT   |
| T |              |                      |
| C | c.799G>C     | c.(799-801)Gga>Cga   |
| A | c.1373G>A    | c.(1372-1374)gGa>gAa |
| T | c.127G>A     | c.(127-129)Gcc>Acc   |
| A | c.17153C>T   |                      |
| C |              |                      |
| A | c.169_splice | c.e5-1               |
| T | c.148G>A     | c.(148-150)Gaa>Aaa   |
| A | c.1709C>T    | c.(1708-1710)cCc>cTc |
| T | c.709T>A     |                      |
| A |              |                      |
| A |              |                      |
| C | c.482A>G     | c.(481-483)gAg>gGg   |
| A | c.886_splice | c.e7-1               |
| A |              |                      |
| T | c.2545C>T    | c.(2545-2547)Ctg>Ttg |
| T | c.426G>A     | c.(424-426)atG>atA   |
| G | c.1954T>C    | c.(1954-1956)Tac>Cac |
| A | c.714C>T     | c.(712-714)ctC>ctT   |
| T | c.1266C>T    | c.(1264-1266)tcC>tcT |
| T | c.240G>A     | c.(238-240)atG>atA   |
| A | c.500C>T     | c.(499-501)tCa>tTa   |
| A | c.1068G>A    | c.(1066-1068)cgG>cgA |
| T | c.2984G>A    | c.(2983-2985)aGa>aAa |
| A | c.1680C>T    | c.(1678-1680)ctC>ctT |
| A |              |                      |

|   |               |                        |
|---|---------------|------------------------|
| G |               |                        |
| T |               |                        |
| A | c.124C>T      | c.(124-126)Ctg>Ttg     |
| A |               |                        |
| A | c.201G>A      | c.(199-201)atG>atA     |
| A |               |                        |
| A | c.15758C>T    | c.(15757-15759)tCt>tTt |
| A | c.373C>T      | c.(373-375)Cgc>Tgc     |
| A |               |                        |
| T |               |                        |
| A |               |                        |
| T |               |                        |
| T | c.742C>T      | c.(742-744)Ctc>Ttc     |
| T | c.7528T>A     | c.(7528-7530)Tta>Ata   |
| T | c.13275G>A    | c.(13273-13275)acG>acA |
| T | c.2667G>A     | c.(2665-2667)acG>acA   |
| A | c.552G>A      | c.(550-552)tgG>tgA     |
| T |               |                        |
| T |               |                        |
| T | c.3148T>A     | c.(3148-3150)Tat>Aat   |
| T | c.1243G>A     | c.(1243-1245)Gac>Aac   |
| T |               |                        |
| T | c.2605C>T     | c.(2605-2607)Cat>Tat   |
| T |               |                        |
| A |               |                        |
| T | c.1564G>A     | c.(1564-1566)Gaa>Aaa   |
| A |               |                        |
| T | c.501G>A      | c.(499-501)gtG>gtA     |
| T | c.853C>T      | c.(853-855)Cag>Tag     |
| A | c.79G>A       | c.(79-81)Gaa>Aaa       |
| T | c.3031G>A     | c.(3031-3033)Gaa>Aaa   |
| A | c.865C>T      | c.(865-867)Cgt>Tgt     |
| T | c.561C>T      | c.(559-561)ttC>ttT     |
| T |               |                        |
| A | c.1147G>A     | c.(1147-1149)Gag>Aag   |
| G | c.1739T>C     | c.(1738-1740)aTg>aCg   |
| A |               |                        |
| A | c.2400G>A     | c.(2398-2400)gcG>gcA   |
| T | c.1500C>T     | c.(1498-1500)tcC>tcT   |
| T | c.280G>A      | c.(280-282)Gaa>Aaa     |
| A | c.4811_splice | c.e12+1                |
| T | c.1898C>T     | c.(1897-1899)aCc>aTc   |

|   |           |                      |
|---|-----------|----------------------|
| A | c.1124G>A | c.(1123-1125)cGg>cAg |
| A |           |                      |
| A |           |                      |
| A | c.125C>T  | c.(124-126)tCc>tTc   |
| T | c.1853C>T | c.(1852-1854)tCa>tTa |
| A | c.1352C>T | c.(1351-1353)cCg>cTg |
| A | c.451G>A  | c.(451-453)Gag>Aag   |
| A | c.1855C>T | c.(1855-1857)Cca>Tca |
| C | c.1059A>C | c.(1057-1059)gcA>gcC |
| T | c.2137G>A | c.(2137-2139)Gaa>Aaa |
| A | c.368C>T  | c.(367-369)cCt>cTt   |
| T | c.1062G>A | c.(1060-1062)gaG>gaA |
| T | c.127C>T  | c.(127-129)Ccg>Tcg   |
| A | c.928G>A  | c.(928-930)Gag>Aag   |
| G | c.5062T>C | c.(5062-5064)Ttc>Ctc |
| A | c.1973T>A | c.(1972-1974)tTt>tAt |
| T | c.2996C>T | c.(2995-2997)tCg>tTg |
| A | c.3523C>T |                      |
| T |           |                      |
| A | c.1471C>A | c.(1471-1473)Cga>Aga |
| T |           |                      |
| A | c.805C>T  | c.(805-807)Ccc>Tcc   |
| A | c.5006C>T | c.(5005-5007)gCc>gTc |
| T |           |                      |
| T | c.877G>A  | c.(877-879)Gat>Aat   |
| A | c.867C>T  | c.(865-867)tcC>tcT   |
| T | c.3882C>T | c.(3880-3882)ttC>ttT |
| A | c.605C>T  | c.(604-606)tCc>tTc   |
| T | c.3186C>T | c.(3184-3186)aaC>aaT |
| A | c.994G>A  | c.(994-996)Gaa>Aaa   |
| A | c.2121G>T | c.(2119-2121)cgG>cgT |
| T |           |                      |
| C | c.5333C>G | c.(5332-5334)tCt>tGt |
| A |           |                      |
| T | c.969G>T  | c.(967-969)gtG>gtT   |
| A |           |                      |
| T | c.250C>T  | c.(250-252)Ccc>Tcc   |
| A | c.5577C>T | c.(5575-5577)tcC>tcT |
| A | c.3041G>A | c.(3040-3042)gGa>gAa |
| T | c.1619G>A | c.(1618-1620)gGa>gAa |
| T | c.138G>A  | c.(136-138)gaG>gaA   |
| T |           |                      |
| A | c.3493G>A | c.(3493-3495)Gga>Aga |

|   |           |                      |
|---|-----------|----------------------|
| A | c.394G>A  | c.(394-396)Gat>Aat   |
| T | c.397G>A  | c.(397-399)Gag>Aag   |
| A |           |                      |
| A | c.738G>A  | c.(736-738)aaG>aaA   |
| A | c.1713C>T | c.(1711-1713)atC>atT |
| T | c.1152C>T | c.(1150-1152)atC>atT |
| A | c.2094G>T | c.(2092-2094)aaG>aaT |
| A | c.2253G>A | c.(2251-2253)aaG>aaA |
| G | c.804C>G  | c.(802-804)ctC>ctG   |
| A | c.404C>T  | c.(403-405)cCc>cTc   |
| T | c.982C>T  | c.(982-984)Ctc>Ttc   |
| C | c.295T>C  | c.(295-297)Tat>Cat   |
| A | c.1066G>A | c.(1066-1068)Gtg>Atg |
| G |           |                      |
| A | c.182G>A  | c.(181-183)cGa>cAa   |
| A | c.506G>A  | c.(505-507)cGg>cAg   |
| T | c.1396G>A | c.(1396-1398)Gga>Aga |
| A | c.57C>T   | c.(55-57)atC>atT     |
| A | c.620G>A  | c.(619-621)gGa>gAa   |
| T | c.187G>A  | c.(187-189)Gtt>Att   |
| A | c.711C>T  | c.(709-711)ttC>ttT   |
| A | c.473C>T  | c.(472-474)gCc>gTc   |
| A | c.1147G>A | c.(1147-1149)Gag>Aag |
| A | c.3406G>A | c.(3406-3408)Gaa>Aaa |
| C | c.4998T>C | c.(4996-4998)ctT>ctC |
| A | c.1184A>T | c.(1183-1185)aAt>aTt |
| A |           |                      |
| T | c.287C>T  | c.(286-288)cCg>cTg   |
| A |           |                      |
| C | c.356A>C  | c.(355-357)aAg>aCg   |
| A | c.545C>A  | c.(544-546)tCt>tAt   |
| A | c.57G>A   | c.(55-57)caG>caA     |
| A | c.966C>T  | c.(964-966)tcC>tcT   |
| G | c.1431G>C | c.(1429-1431)gaG>gaC |
| T | c.1910G>A | c.(1909-1911)gGg>gAg |
| T | c.739G>A  | c.(739-741)Gaa>Aaa   |
| A | c.605G>A  | c.(604-606)aGg>aAg   |
| T | c.170G>A  | c.(169-171)cGa>cAa   |
| A | c.2840G>A | c.(2839-2841)gGa>gAa |
| T | c.2686G>A | c.(2686-2688)Gat>Aat |
| A | c.288C>T  | c.(286-288)ccC>ccT   |
| T | c.279C>T  | c.(277-279)acC>acT   |
| A | c.438G>A  | c.(436-438)agG>agA   |

|   |                |                      |
|---|----------------|----------------------|
| A | c.639G>A       | c.(637-639)gtG>gtA   |
| T | c.762T>A       | c.(760-762)gtT>gtA   |
| T |                |                      |
| A | c.255C>T       | c.(253-255)tcC>tcT   |
| A | c.2650G>A      | c.(2650-2652)Gaa>Aaa |
| A | c.1516G>A      | c.(1516-1518)Gat>Aat |
| A | c.2423C>A      | c.(2422-2424)tCg>tAg |
| T | c.1192G>A      | c.(1192-1194)Gaa>Aaa |
| A | c.555_splice   | c.e6-1               |
| A | c.130C>T       | c.(130-132)Cgc>Tgc   |
| A | c.378C>T       | c.(376-378)ttC>ttT   |
| A | c.4945C>T      | c.(4945-4947)Cat>Tat |
| T | c.621C>T       | c.(619-621)gcC>gcT   |
| T | c.1489C>A      |                      |
| T | c.1231C>T      | c.(1231-1233)Cat>Tat |
| A | c.698G>A       | c.(697-699)aGc>aAc   |
| T |                |                      |
| G |                |                      |
| A | c.288C>T       | c.(286-288)tcC>tcT   |
| A | c.2129C>T      | c.(2128-2130)cCc>cTc |
| T | c.19G>A        | c.(19-21)Ggc>Agc     |
| G | c.1466T>C      | c.(1465-1467)cTt>cCt |
| T | c.1291G>A      | c.(1291-1293)Gac>Aac |
| A | c.1660C>T      | c.(1660-1662)Ctg>Ttg |
| A | c.3797G>A      | c.(3796-3798)gGa>gAa |
| A | c.4178G>A      | c.(4177-4179)cGa>cAa |
| A | c.3705G>A      | c.(3703-3705)atG>atA |
| T | c.2452C>T      | c.(2452-2454)Ccc>Tcc |
| T | c.1103C>T      | c.(1102-1104)tCc>tTc |
| T | c.-2609_splice | c.e1-1               |
| T | c.1712C>T      | c.(1711-1713)tCc>tTc |
| T | c.2083G>A      | c.(2083-2085)Gag>Aag |
| A | c.120G>A       | c.(118-120)caG>caA   |
| A | c.701C>T       | c.(700-702)tCt>tTt   |
| A | c.62C>T        | c.(61-63)tCg>tTg     |
| T | c.45C>T        | c.(43-45)gcC>gcT     |
| T | c.226C>T       | c.(226-228)Ctg>Ttg   |
| A | c.5175C>T      | c.(5173-5175)gtC>gtT |
| A | c.3474C>T      | c.(3472-3474)tcC>tcT |
| A |                |                      |
| A | c.1273G>A      | c.(1273-1275)Gat>Aat |
| A | c.3607C>T      | c.(3607-3609)Cct>Tct |
| A | c.164G>A       | c.(163-165)gGg>gAg   |

|   |               |                        |
|---|---------------|------------------------|
| T | c.589C>T      | c.(589-591)Cac>Tac     |
| C |               |                        |
| T | c.172C>T      | c.(172-174)Ctg>Ttg     |
| T | c.548C>T      | c.(547-549)cCa>cTa     |
| T | c.3046G>A     | c.(3046-3048)Gaa>Aaa   |
| C | c.212T>C      | c.(211-213)gTg>gCg     |
| A | c.18099C>T    | c.(18097-18099)tcC>tcT |
| T |               |                        |
| T | c.1312G>A     | c.(1312-1314)Gaa>Aaa   |
| T | c.1375G>A     | c.(1375-1377)Gac>Aac   |
| T |               |                        |
| T | c.1131C>T     | c.(1129-1131)gcC>gcT   |
| T | c.588G>A      | c.(586-588)ctG>ctA     |
| A | c.625C>A      | c.(625-627)Caa>Aaa     |
| T | c.229G>A      | c.(229-231)Ggg>Agg     |
| T | c.2074C>T     | c.(2074-2076)Cct>Tct   |
| A | c.795G>A      | c.(793-795)tgG>tgA     |
| A |               |                        |
| T | c.1928G>A     | c.(1927-1929)cGa>cAa   |
| A | c.935G>A      | c.(934-936)gGa>gAa     |
| T |               |                        |
| G | c.139A>G      | c.(139-141)Agg>Ggg     |
| T | c.1634G>T     | c.(1633-1635)aGc>aTc   |
| A | c.454G>A      | c.(454-456)Gag>Aag     |
| A | c.133G>A      | c.(133-135)Gag>Aag     |
| T |               |                        |
| A |               |                        |
| T | c.17363G>A    | c.(17362-17364)aGg>aAg |
| T | c.487C>T      | c.(487-489)Ccc>Tcc     |
| T | c.600C>T      | c.(598-600)tcC>tcT     |
| A | c.3584C>T     | c.(3583-3585)tCc>tTc   |
| A | c.3520_splice | c.e24-1                |
| T |               |                        |
| T | c.202C>T      | c.(202-204)Cca>Tca     |
| A | c.2550G>A     | c.(2548-2550)aaG>aaA   |
| C | c.610G>C      | c.(610-612)Gga>Cga     |
| A |               |                        |
| T | c.537G>A      | c.(535-537)tcG>tcA     |
| A | c.3220C>T     | c.(3220-3222)Cag>Tag   |
| A | c.3208G>A     | c.(3208-3210)Gaa>Aaa   |
| A | c.5948C>T     | c.(5947-5949)tCc>tTc   |
| A |               |                        |
| T | c.194C>T      | c.(193-195)tCc>tTc     |

|   |            |                        |
|---|------------|------------------------|
| T | c.1348C>T  | c.(1348-1350)Ctc>Ttc   |
| A | c.4130C>T  | c.(4129-4131)cCt>cTt   |
| T | c.841C>T   | c.(841-843)Ctt>Ttt     |
| A | c.1523G>A  | c.(1522-1524)gGc>gAc   |
| T | c.590C>T   | c.(589-591)tCc>tTc     |
| T |            |                        |
| A | c.1121C>T  | c.(1120-1122)tCt>tTt   |
| A | c.618C>T   | c.(616-618)ttC>ttT     |
| A | c.3189C>T  | c.(3187-3189)ttC>ttT   |
| A | c.2998G>A  | c.(2998-3000)Gaa>Aaa   |
| T |            |                        |
| T | c.1357C>A  | c.(1357-1359)Cag>Aag   |
| T | c.1185C>T  | c.(1183-1185)caC>caT   |
| A | c.754G>A   | c.(754-756)Gac>Aac     |
| A | c.122G>A   | c.(121-123)gGa>gAa     |
| T | c.34G>A    | c.(34-36)Gga>Aga       |
| T | c.432G>A   | c.(430-432)atG>atA     |
| C | c.290T>G   | c.(289-291)aTg>aGg     |
| A | c.1868C>T  | c.(1867-1869)tCc>tTc   |
| A | c.1847G>A  | c.(1846-1848)gGa>gAa   |
| T |            |                        |
| A | c.6376G>A  | c.(6376-6378)Gac>Aac   |
| T | c.391G>A   | c.(391-393)Gat>Aat     |
| A | c.582G>A   | c.(580-582)gaG>gaA     |
| T | c.1116G>A  |                        |
| A | c.15571C>T | c.(15571-15573)Ctg>Ttg |
| A | c.164C>T   | c.(163-165)cCt>cTt     |
| T | c.252G>T   | c.(250-252)gaG>gaT     |
| T | c.1221G>A  | c.(1219-1221)tgG>tgA   |
| T | c.964C>T   | c.(964-966)Cct>Tct     |
| T | c.1606C>T  | c.(1606-1608)Cct>Tct   |
| T | c.864C>T   | c.(862-864)ccC>ccT     |
| A | c.672C>T   | c.(670-672)tcC>tcT     |
| T |            |                        |
| T | c.2386G>A  | c.(2386-2388)Gat>Aat   |
| A | c.1210C>T  | c.(1210-1212)Cca>Tca   |
| A | c.655C>T   | c.(655-657)Ccc>Tcc     |
| T | c.699C>T   | c.(697-699)gtC>gtT     |
| A | c.1204G>A  | c.(1204-1206)Gag>Aag   |
| A | c.1788C>T  | c.(1786-1788)agC>agT   |
| T | c.1490G>A  | c.(1489-1491)tGg>tAg   |
| T | c.162C>T   | c.(160-162)ttC>ttT     |
| C | c.4123C>G  | c.(4123-4125)Ccc>Gcc   |



|   |               |                      |
|---|---------------|----------------------|
| A | c.300C>T      | c.(298-300)ttC>ttT   |
| T |               |                      |
| T |               |                      |
| A | c.2394A>T     | c.(2392-2394)ttA>ttT |
| A |               |                      |
| A | c.635C>T      | c.(634-636)cCa>cTa   |
| G | c.1496A>C     | c.(1495-1497)aAa>aCa |
| A | c.986_splice  | c.e9-1               |
| A | c.1010_splice | c.e3-1               |
| A |               |                      |
| T | c.1701G>A     | c.(1699-1701)gaG>gaA |
| A |               |                      |
| A | c.1639G>A     |                      |
| T | c.275T>A      | c.(274-276)tTt>tAt   |
| A | c.7833C>T     | c.(7831-7833)ttC>ttT |
| A | c.1268_splice | c.e7+1               |
| A | c.1924G>A     | c.(1924-1926)Gga>Aga |
| A | c.2446C>T     | c.(2446-2448)Cct>Tct |
| A | c.3354C>T     | c.(3352-3354)tcC>tcT |
| T |               |                      |
| A |               |                      |
| A | c.1683C>T     | c.(1681-1683)tcC>tcT |
| A | c.312G>A      | c.(310-312)agG>agA   |
| G | c.1636A>G     | c.(1636-1638)Act>Gct |
| A |               |                      |
| T | c.955G>A      | c.(955-957)Gaa>Aaa   |
| G |               |                      |
| T |               |                      |
| A | c.380C>T      | c.(379-381)gCt>gTt   |
| T |               |                      |
| T |               |                      |
| T | c.875C>T      | c.(874-876)tCc>tTc   |
| T | c.2969C>T     | c.(2968-2970)tCc>tTc |
| T | c.984C>T      | c.(982-984)atC>atT   |
| G | c.1438G>C     | c.(1438-1440)Gtc>Ctc |
| T | c.6783C>T     | c.(6781-6783)ttC>ttT |
| A | c.1685G>A     | c.(1684-1686)gGa>gAa |
| T |               |                      |
| G | c.736C>G      | c.(736-738)Ctt>Gtt   |
| A | c.3790T>A     | c.(3790-3792)Ttt>Att |
| A | c.1490C>T     |                      |
| A | c.1888C>T     | c.(1888-1890)Cgg>Tgg |
| T | c.1387C>T     | c.(1387-1389)Ccc>Tcc |

|   |               |                      |
|---|---------------|----------------------|
| T |               |                      |
| T |               |                      |
| T | c.745C>T      | c.(745-747)Cgg>Tgg   |
| A | c.2603C>T     | c.(2602-2604)tCc>tTc |
| A | c.2621G>T     | c.(2620-2622)tGg>tTg |
| T | c.148G>A      | c.(148-150)Gac>Aac   |
| G | c.8401A>C     | c.(8401-8403)Aac>Cac |
| A | c.601G>A      | c.(601-603)Gaa>Aaa   |
| T |               |                      |
| T | c.1957C>T     | c.(1957-1959)Ctg>Ttg |
| A |               |                      |
| A | c.1358C>T     | c.(1357-1359)tCc>tTc |
| T | c.847G>A      | c.(847-849)Ggc>Agc   |
| A | c.959C>T      | c.(958-960)cCc>cTc   |
| A | c.1938G>A     |                      |
| T | c.5267C>T     | c.(5266-5268)cCc>cTc |
| A | c.382G>A      | c.(382-384)Gat>Aat   |
| A |               |                      |
| C |               |                      |
| T |               |                      |
| A |               |                      |
| A | c.4251C>T     | c.(4249-4251)ctC>ctT |
| T | c.1647G>A     | c.(1645-1647)atG>atA |
| A |               |                      |
| T |               |                      |
| T | c.335G>A      | c.(334-336)aGa>aAa   |
| T |               |                      |
| A | c.47C>T       | c.(46-48)tCc>tTc     |
| A | c.268C>T      |                      |
| C | c.219G>C      | c.(217-219)agG>agC   |
| A | c.1105G>A     | c.(1105-1107)Gga>Aga |
| T | c.576C>A      | c.(574-576)agC>agA   |
| T | c.1349C>T     | c.(1348-1350)cCc>cTc |
| T |               |                      |
| T | c.1879G>A     | c.(1879-1881)Ggg>Agg |
| A | c.897C>T      | c.(895-897)ttC>ttT   |
| A | c.4171C>T     | c.(4171-4173)Ccc>Tcc |
| A | c.1840G>A     | c.(1840-1842)Gac>Aac |
| A | c.940C>T      | c.(940-942)Cac>Tac   |
| A | c.139C>T      | c.(139-141)Cgt>Tgt   |
| A | c.2470G>A     | c.(2470-2472)Gaa>Aaa |
| T | c.614C>T      | c.(613-615)tCc>tTc   |
| T | c.-112_splice | c.e1-1               |

|   |              |                      |
|---|--------------|----------------------|
| A | c.1442G>A    | c.(1441-1443)cGa>cAa |
| T | c.6609G>A    | c.(6607-6609)ctG>ctA |
| T | c.1222C>T    | c.(1222-1224)Cct>Tct |
| T | c.2283C>T    | c.(2281-2283)ccC>ccT |
| A | c.57T>A      | c.(55-57)ttT>ttA     |
| T | c.371G>A     | c.(370-372)gGg>gAg   |
| T | c.680G>A     | c.(679-681)gGg>gAg   |
| A | c.941C>T     | c.(940-942)cCt>cTt   |
| T |              |                      |
| T | c.839C>T     | c.(838-840)tCc>tTc   |
| A | c.2031T>A    | c.(2029-2031)ttT>ttA |
| T |              |                      |
| A |              |                      |
| T | c.1537G>A    | c.(1537-1539)Gag>Aag |
| T | c.216G>A     | c.(214-216)atG>atA   |
| G | c.2319T>C    | c.(2317-2319)ctT>ctC |
| A | c.672G>A     | c.(670-672)gaG>gaA   |
| A | c.1460G>A    | c.(1459-1461)gGa>gAa |
| A | c.1060G>A    | c.(1060-1062)Gaa>Aaa |
| T | c.2446A>T    | c.(2446-2448)Act>Tct |
| T | c.3014T>A    | c.(3013-3015)cTt>cAt |
| A | c.930C>T     | c.(928-930)ggC>ggT   |
| A | c.1157C>T    | c.(1156-1158)tCc>tTc |
| A | c.981_splice | c.e11-1              |
| A | c.538G>A     | c.(538-540)Gaa>Aaa   |
| T | c.337G>A     | c.(337-339)Gat>Aat   |
| A | c.1329G>A    | c.(1327-1329)caG>caA |
| T | c.3225C>A    | c.(3223-3225)caC>caA |
| T |              |                      |
| A | c.33G>A      | c.(31-33)gaG>gaA     |
| A |              |                      |
| A | c.1454G>A    | c.(1453-1455)gGg>gAg |
| A | c.540C>T     | c.(538-540)ccC>ccT   |
| A | c.38G>A      | c.(37-39)gGg>gAg     |
| T | c.761C>T     | c.(760-762)tCc>tTc   |
| C | c.345A>G     | c.(343-345)gtA>gtG   |
| T | c.1050C>T    | c.(1048-1050)tcC>tcT |
| T | c.1998C>T    | c.(1996-1998)ccC>ccT |
| T | c.2665C>T    | c.(2665-2667)Ccc>Tcc |
| T | c.1265C>T    | c.(1264-1266)tCc>tTc |
| T | c.852G>T     | c.(850-852)agG>agT   |
| A | c.4077C>T    | c.(4075-4077)atC>atT |
| T | c.573C>T     | c.(571-573)ttC>ttT   |

|   |               |                        |
|---|---------------|------------------------|
| T | c.60951G>A    | c.(60949-60951)tcG>tcA |
| G | c.1420A>G     | c.(1420-1422)Act>Gct   |
| A | c.118C>T      | c.(118-120)Cac>Tac     |
| G | c.1315T>C     | c.(1315-1317)Ttt>Ctt   |
| T | c.782G>A      | c.(781-783)gGa>gAa     |
| A | c.549G>A      | c.(547-549)tgG>tgA     |
| A |               |                        |
| T | c.307C>T      | c.(307-309)Cac>Tac     |
| T | c.789C>T      | c.(787-789)atC>atT     |
| A | c.5110G>A     | c.(5110-5112)Gag>Aag   |
| A | c.1053C>T     | c.(1051-1053)ttC>ttT   |
| T | c.1187A>T     | c.(1186-1188)aAc>aTc   |
| T | c.2553C>T     | c.(2551-2553)gcC>gcT   |
| G | c.1940A>G     | c.(1939-1941)gAt>gGt   |
| T | c.1756C>T     | c.(1756-1758)Ctt>Ttt   |
| T | c.1846G>A     | c.(1846-1848)Ggc>Agc   |
| T | c.396G>A      | c.(394-396)gaG>gaA     |
| A | c.962C>T      | c.(961-963)aCc>aTc     |
| A | c.960C>T      | c.(958-960)gtC>gtT     |
| T | c.2559G>A     | c.(2557-2559)ggG>ggA   |
| C | c.734C>G      | c.(733-735)aCc>aGc     |
| A |               |                        |
| A | c.372C>T      | c.(370-372)tcC>tcT     |
| A |               |                        |
| T | c.213A>T      |                        |
| T | c.1247C>T     | c.(1246-1248)aCc>aTc   |
| A | c.787C>A      | c.(787-789)Cgg>Agg     |
| T |               |                        |
| T | c.795C>T      | c.(793-795)atC>atT     |
| G | c.2452A>C     | c.(2452-2454)Aga>Cga   |
| A | c.3100G>A     | c.(3100-3102)Ggc>Agc   |
| T | c.1389C>T     | c.(1387-1389)ttC>ttT   |
| A |               |                        |
| A | c.882C>T      |                        |
| A | c.1957G>A     | c.(1957-1959)Gag>Aag   |
| A | c.94G>A       | c.(94-96)Gcc>Acc       |
| A |               |                        |
| A |               |                        |
| T | c.1576G>A     | c.(1576-1578)Gaa>Aaa   |
| C | c.5794C>G     | c.(5794-5796)Cag>Gag   |
| A | c.1646_splice | c.e18-1                |
| T | c.2154C>T     | c.(2152-2154)ttC>ttT   |
| A | c.1154C>T     | c.(1153-1155)cCa>cTa   |

|   |            |                        |
|---|------------|------------------------|
| G |            |                        |
| A | c.3099G>A  | c.(3097-3099)acG>acA   |
| A | c.272G>A   | c.(271-273)cGa>cAa     |
| T |            |                        |
| A | c.917C>T   | c.(916-918)tCt>tTt     |
| T | c.442C>T   | c.(442-444)Ccg>Tcg     |
| A | c.4G>A     | c.(4-6)Gag>Aag         |
| T | c.2094C>T  | c.(2092-2094)ttC>ttT   |
| A | c.124G>A   | c.(124-126)Gaa>Aaa     |
| T | c.310G>A   | c.(310-312)Gag>Aag     |
| A | c.1564G>A  | c.(1564-1566)Gac>Aac   |
| T | c.1583G>A  | c.(1582-1584)gGg>gAg   |
| T | c.1654G>A  | c.(1654-1656)Gaa>Aaa   |
| A | c.447C>T   | c.(445-447)tcC>tcT     |
| T | c.665C>T   | c.(664-666)cCt>cTt     |
| T |            |                        |
| A | c.428G>A   | c.(427-429)gGa>gAa     |
| A |            |                        |
| A | c.162G>A   | c.(160-162)aaG>aaA     |
| G | c.875A>G   | c.(874-876)cAa>cGa     |
| T | c.1218C>T  | c.(1216-1218)tcC>tcT   |
| A | c.1001G>A  | c.(1000-1002)aGa>aAa   |
| T | c.724G>A   | c.(724-726)Gaa>Aaa     |
| A | c.1315C>T  | c.(1315-1317)Ccc>Tcc   |
| A |            |                        |
| T |            |                        |
| A | c.3057C>T  | c.(3055-3057)ccC>ccT   |
| T | c.1239C>T  | c.(1237-1239)gcC>gcT   |
| A | c.599C>T   |                        |
| T | c.672G>A   | c.(670-672)gaG>gaA     |
| T | c.94G>A    | c.(94-96)Gaa>Aaa       |
| T | c.2537C>T  | c.(2536-2538)gCt>gTt   |
| T | c.388G>A   | c.(388-390)Gag>Aag     |
| A | c.23148C>T | c.(23146-23148)ttC>ttT |
| A | c.1045G>A  | c.(1045-1047)Gac>Aac   |
| A | c.326G>A   | c.(325-327)gGa>gAa     |
| T | c.578G>A   | c.(577-579)gGa>gAa     |
| A | c.3082G>A  | c.(3082-3084)Gag>Aag   |
| A | c.2346G>A  | c.(2344-2346)ggG>ggA   |
| A |            |                        |
| T | c.2048G>A  | c.(2047-2049)aGg>aAg   |
| T | c.35C>T    | c.(34-36)tCg>tTg       |

|   |               |                        |
|---|---------------|------------------------|
| A | c.2351G>A     | c.(2350-2352)gGa>gAa   |
| A | c.1721G>A     | c.(1720-1722)cGa>cAa   |
| C |               |                        |
| A | c.1722G>A     | c.(1720-1722)aaG>aaA   |
| T | c.31005G>A    | c.(31003-31005)aaG>aaA |
| A |               |                        |
| T |               |                        |
| T | c.3820C>T     | c.(3820-3822)Cag>Tag   |
| T | c.2245G>A     |                        |
| G | c.441T>G      | c.(439-441)taT>taG     |
| T |               |                        |
| G | c.3512A>C     | c.(3511-3513)gAg>gCg   |
| A | c.366C>T      | c.(364-366)ctC>ctT     |
| T | c.1144G>A     | c.(1144-1146)Gga>Aga   |
| T | c.1595G>A     | c.(1594-1596)gGa>gAa   |
| A | c.1666T>A     | c.(1666-1668)Ttc>Atc   |
| T |               |                        |
| A | c.194G>A      | c.(193-195)gGc>gAc     |
| T | c.1585C>T     | c.(1585-1587)Caa>Taa   |
| T | c.99G>T       | c.(97-99)ctG>ctT       |
| A | c.265C>T      | c.(265-267)Ccc>Tcc     |
| A | c.1012C>T     | c.(1012-1014)Cta>Tta   |
| A | c.366C>T      | c.(364-366)tcC>tcT     |
| A | c.1645G>A     | c.(1645-1647)Gaa>Aaa   |
| A | c.11672C>T    | c.(11671-11673)tCt>tTt |
| T | c.34C>T       | c.(34-36)Cct>Tct       |
| T | c.150C>T      | c.(148-150)gaC>gaT     |
| A | c.1131C>T     | c.(1129-1131)ttC>ttT   |
| A | c.381G>A      | c.(379-381)ttG>ttA     |
| A | c.3814G>A     | c.(3814-3816)Gaa>Aaa   |
| A | c.1545G>A     | c.(1543-1545)ctG>ctA   |
| G | c.1439A>C     | c.(1438-1440)gAa>gCa   |
| A | c.369C>T      | c.(367-369)atC>atT     |
| T |               |                        |
| T | c.183C>T      | c.(181-183)ttC>ttT     |
| A | c.254C>T      | c.(253-255)tCc>tTc     |
| T | c.736G>A      | c.(736-738)Gag>Aag     |
| T | c.834G>A      | c.(832-834)gtG>gtA     |
| A | c.1885G>A     | c.(1885-1887)Gag>Aag   |
| A |               |                        |
| A | c.2479_splice | c.e21-1                |
| T | c.1576C>A     | c.(1576-1578)Caa>Aaa   |

|   |            |                        |
|---|------------|------------------------|
| T |            |                        |
| T | c.2120G>A  | c.(2119-2121)aGg>aAg   |
| T | c.715G>A   | c.(715-717)Gga>Aga     |
| T | c.591C>T   | c.(589-591)tcC>tcT     |
| T | c.2214C>T  | c.(2212-2214)ttC>ttT   |
| G | c.387G>C   | c.(385-387)cgG>cgC     |
| A | c.335G>A   | c.(334-336)gGa>gAa     |
| G | c.2212A>C  | c.(2212-2214)Aac>Cac   |
| T |            |                        |
| A | c.526G>A   | c.(526-528)Gaa>Aaa     |
| A | c.679C>T   | c.(679-681)Cac>Tac     |
| A | c.1018G>A  | c.(1018-1020)Gct>Act   |
| T | c.1503C>T  | c.(1501-1503)acC>acT   |
| C | c.1292T>G  | c.(1291-1293)tTt>tGt   |
| T |            |                        |
| A | c.654C>T   | c.(652-654)atC>atT     |
| T |            |                        |
| A | c.604G>A   | c.(604-606)Gaa>Aaa     |
| T |            |                        |
| A | c.7664G>A  | c.(7663-7665)gGa>gAa   |
| G | c.64655T>C | c.(64654-64656)cTt>cCt |
| A | c.3472C>T  | c.(3472-3474)Cga>Tga   |
| A | c.1026C>T  | c.(1024-1026)ccC>ccT   |
| T | c.346G>A   | c.(346-348)Gaa>Aaa     |
| T | c.450C>T   | c.(448-450)ccC>ccT     |
| T | c.1371C>T  | c.(1369-1371)atC>atT   |
| T |            |                        |
| T | c.511C>T   | c.(511-513)Ccc>Tcc     |
| T | c.472C>T   | c.(472-474)Cgt>Tgt     |
| T | c.882C>T   | c.(880-882)gaC>gaT     |
| A | c.2944G>A  | c.(2944-2946)Gaa>Aaa   |
| A | c.2398C>T  | c.(2398-2400)Cca>Tca   |
| T | c.1505G>A  | c.(1504-1506)gGa>gAa   |
| C | c.187C>G   | c.(187-189)Cta>Gta     |
| T | c.1429G>A  | c.(1429-1431)Gga>Aga   |
| T | c.227C>T   | c.(226-228)tCg>tTg     |
| A |            |                        |
| T | c.214G>A   | c.(214-216)Gaa>Aaa     |
| G | c.643T>C   | c.(643-645)Tcc>Ccc     |
| G | c.2447T>C  | c.(2446-2448)cTt>cCt   |
| T | c.79G>A    | c.(79-81)Gac>Aac       |
| T | c.728G>A   | c.(727-729)aGg>aAg     |
| T | c.1577G>A  | c.(1576-1578)gGa>gAa   |

|   |               |                        |
|---|---------------|------------------------|
| A | c.420G>A      | c.(418-420)ccG>ccA     |
| A | c.228C>T      | c.(226-228)atC>atT     |
| A | c.1603G>A     | c.(1603-1605)Gac>Aac   |
| T |               |                        |
| C | c.3027C>G     | c.(3025-3027)ccC>ccG   |
| T | c.308G>A      | c.(307-309)gGc>gAc     |
| T | c.2832G>A     | c.(2830-2832)ggG>ggA   |
| T | c.671G>A      | c.(670-672)tGg>tAg     |
| T |               |                        |
| T | c.509G>A      | c.(508-510)cGa>cAa     |
| A | c.1912C>T     | c.(1912-1914)Cca>Tca   |
| T | c.48G>A       | c.(46-48)gcG>gcA       |
| A | c.81C>T       | c.(79-81)gcC>gcT       |
| T | c.851T>A      | c.(850-852)cTt>cAt     |
| T |               |                        |
| T | c.815C>T      | c.(814-816)tCc>tTc     |
| T | c.168G>A      | c.(166-168)ggG>ggA     |
| A | c.1043C>T     | c.(1042-1044)tCc>tTc   |
| T | c.3319G>A     | c.(3319-3321)Gac>Aac   |
| T | c.1896_splice | c.e15+1                |
| T | c.142C>T      | c.(142-144)Cta>Tta     |
| T | c.939G>A      | c.(937-939)gcG>gcA     |
| T | c.937G>A      | c.(937-939)Gtg>Atg     |
| A | c.518G>A      | c.(517-519)gGg>gAg     |
| A | c.229G>A      | c.(229-231)Gag>Aag     |
| T |               |                        |
| A | c.1496G>A     | c.(1495-1497)aGg>aAg   |
| T | c.2221C>T     | c.(2221-2223)Ccg>Tcg   |
| T | c.423G>A      | c.(421-423)tcG>tcA     |
| A | c.1627C>T     | c.(1627-1629)Cgc>Tgc   |
| A | c.6004G>A     | c.(6004-6006)Ggc>Agc   |
| A | c.277C>T      | c.(277-279)Ccc>Tcc     |
| A | c.1010G>A     | c.(1009-1011)cGg>cAg   |
| T | c.975G>A      | c.(973-975)tgG>tgA     |
| A | c.723C>T      | c.(721-723)ttC>ttT     |
| G | c.873G>C      | c.(871-873)atG>atC     |
| T | c.10513C>T    | c.(10513-10515)Ccc>Tcc |
| T |               |                        |
| A | c.1507C>T     | c.(1507-1509)Ctt>Ttt   |
| T | c.303G>A      | c.(301-303)gaG>gaA     |
| T | c.368C>T      | c.(367-369)gCc>gTc     |
| A | c.829G>A      | c.(829-831)Gag>Aag     |
| A | c.738G>A      | c.(736-738)agG>agA     |



|   |               |                      |
|---|---------------|----------------------|
| T | c.668G>A      | c.(667-669)aGa>aAa   |
| T | c.934C>T      | c.(934-936)Ctt>Ttt   |
| C | c.417T>C      | c.(415-417)ggT>ggC   |
| A | c.464C>T      | c.(463-465)tCc>tTc   |
| T | c.727G>A      | c.(727-729)Gag>Aag   |
| A | c.1500G>A     | c.(1498-1500)cgG>cgA |
| A | c.1169C>T     | c.(1168-1170)cCt>cTt |
| A | c.1317G>A     | c.(1315-1317)ccG>ccA |
| T | c.111C>T      | c.(109-111)tcC>tcT   |
| A | c.645C>T      | c.(643-645)gcC>gcT   |
| T | c.412C>T      | c.(412-414)Ctg>Ttg   |
| A |               |                      |
| A | c.927G>A      | c.(925-927)acG>acA   |
| A | c.171C>T      |                      |
| A | c.232G>A      | c.(232-234)Gag>Aag   |
| T | c.90G>A       | c.(88-90)ctG>ctA     |
| A | c.2932C>T     | c.(2932-2934)Cga>Tga |
| A | c.581A>T      | c.(580-582)aAc>aTc   |
| A | c.478G>A      | c.(478-480)Gta>Ata   |
| G | c.1376T>C     | c.(1375-1377)gTt>gCt |
| A |               |                      |
| T | c.1063G>A     | c.(1063-1065)Gac>Aac |
| A |               |                      |
| A | c.5005C>T     | c.(5005-5007)Cgc>Tgc |
| A | c.38C>T       | c.(37-39)tCg>tTg     |
| A | c.345G>A      | c.(343-345)caG>caA   |
| A | c.965G>A      | c.(964-966)gGg>gAg   |
| A |               |                      |
| T | c.1955G>A     | c.(1954-1956)cGa>cAa |
| C | c.851A>G      | c.(850-852)gAt>gGt   |
| A |               |                      |
| T |               |                      |
| C | c.647A>C      | c.(646-648)aAg>aCg   |
| A |               |                      |
| A | c.2041G>A     | c.(2041-2043)Gaa>Aaa |
| T | c.117G>A      | c.(115-117)atG>atA   |
| T | c.6482C>T     | c.(6481-6483)cCc>cTc |
| T |               |                      |
| A | c.605C>T      | c.(604-606)tCc>tTc   |
| T |               |                      |
| C | c.1480_splice | c.e17-1              |
| T | c.1359C>T     | c.(1357-1359)atC>atT |
| T | c.2634C>T     | c.(2632-2634)atC>atT |

|   |              |                      |
|---|--------------|----------------------|
| T | c.1183G>A    | c.(1183-1185)Gag>Aag |
| G | c.1005T>G    |                      |
| A | c.233C>T     | c.(232-234)tCc>tTc   |
| T | c.395C>T     | c.(394-396)cCc>cTc   |
| T | c.1293G>A    | c.(1291-1293)caG>caA |
| T | c.363C>T     | c.(361-363)tcC>tcT   |
| C | c.1741A>G    | c.(1741-1743)Aaa>Gaa |
| T | c.90C>T      | c.(88-90)ctC>ctT     |
| T | c.1280C>T    | c.(1279-1281)tCg>tTg |
| T | c.1999C>T    | c.(1999-2001)Cgg>Tgg |
| A |              |                      |
| A | c.1840C>T    | c.(1840-1842)Caa>Taa |
| A | c.440C>T     | c.(439-441)cCt>cTt   |
| T | c.736C>T     | c.(736-738)Ctc>Ttc   |
| A | c.1106G>A    | c.(1105-1107)gGa>gAa |
| T | c.303_splice | c.e2+1               |
| A | c.5750C>T    | c.(5749-5751)cCt>cTt |
| A | c.908C>T     | c.(907-909)cCg>cTg   |
| A | c.22C>T      | c.(22-24)Cga>Tga     |
| T | c.3281G>A    | c.(3280-3282)cGa>cAa |
| A | c.1606G>A    | c.(1606-1608)Gaa>Aaa |
| A | c.681G>A     | c.(679-681)gtG>gtA   |
| T | c.538G>A     | c.(538-540)Gga>Aga   |
| T | c.2018C>T    | c.(2017-2019)cCt>cTt |
| A | c.870G>A     | c.(868-870)agG>agA   |
| T | c.3447G>A    | c.(3445-3447)aaG>aaA |
| T | c.872T>A     | c.(871-873)aTg>aAg   |
| C |              |                      |
| T | c.1001G>A    | c.(1000-1002)cGg>cAg |
| A | c.315C>T     | c.(313-315)tcC>tcT   |
| T | c.534C>T     | c.(532-534)ttC>ttT   |
| T | c.220G>A     | c.(220-222)Gag>Aag   |
| T | c.3094G>A    | c.(3094-3096)Gaa>Aaa |
| T | c.2008G>A    | c.(2008-2010)Gat>Aat |
| T | c.-62_splice | c.e1-1               |
| A | c.1014C>T    | c.(1012-1014)ctC>ctT |
| T | c.1038G>A    | c.(1036-1038)gtG>gtA |
| T | c.2110G>T    | c.(2110-2112)Ggc>Tgc |
| T | c.931C>T     | c.(931-933)Cag>Tag   |
| T | c.594C>T     | c.(592-594)atC>atT   |
| A | c.322G>A     | c.(322-324)Gat>Aat   |
| A | c.1176G>A    | c.(1174-1176)ggG>ggA |
| G | c.3292A>G    | c.(3292-3294)Aaa>Gaa |

|   |            |                        |
|---|------------|------------------------|
| T | c.127G>A   | c.(127-129)Gac>Aac     |
| G | c.315T>C   | c.(313-315)ctT>ctC     |
| T | c.1037G>A  | c.(1036-1038)gGc>gAc   |
| T |            |                        |
| T | c.2869G>A  | c.(2869-2871)Gaa>Aaa   |
| T | c.166G>A   | c.(166-168)Gaa>Aaa     |
| A | c.609C>T   | c.(607-609)tcC>tcT     |
| T | c.1151C>T  | c.(1150-1152)cCc>cTc   |
| T | c.1150C>T  | c.(1150-1152)Ccc>Tcc   |
| C | c.199T>G   | c.(199-201)Tcc>Gcc     |
| A | c.21228C>T | c.(21226-21228)tcC>tcT |
| A |            |                        |
| C | c.711A>G   | c.(709-711)ccA>ccG     |
| G | c.1402G>C  | c.(1402-1404)Gac>Cac   |
| G | c.1092C>G  | c.(1090-1092)taC>taG   |
| A | c.76C>T    | c.(76-78)Ctg>Ttg       |
| A | c.453G>T   | c.(451-453)agG>agT     |
| C | c.704A>C   | c.(703-705)cAc>cCc     |
| A | c.23149C>T | c.(23149-23151)Cat>Tat |
| A | c.1452G>A  | c.(1450-1452)agG>agA   |
| A | c.1321C>A  | c.(1321-1323)Cct>Act   |
| T | c.163C>T   | c.(163-165)Ccg>Tcg     |
| T | c.326C>T   | c.(325-327)cCg>cTg     |
| A | c.14024G>A | c.(14023-14025)gGa>gAa |
| A | c.204C>T   | c.(202-204)atC>atT     |
| T | c.1577C>T  | c.(1576-1578)gCc>gTc   |
| A |            |                        |
| T |            |                        |
| T | c.22093G>A |                        |
| T | c.764G>A   | c.(763-765)cGg>cAg     |
| T | c.927G>A   | c.(925-927)aaG>aaA     |
| A | c.2197C>T  | c.(2197-2199)Cta>Tta   |
| A | c.2010C>T  | c.(2008-2010)tcC>tcT   |
| T | c.844G>A   | c.(844-846)Gat>Aat     |
| T | c.3939C>T  | c.(3937-3939)tcC>tcT   |
| A | c.1231C>T  | c.(1231-1233)Ctt>Ttt   |
| A |            |                        |
| T | c.482C>T   | c.(481-483)cCt>cTt     |
| A | c.894G>A   | c.(892-894)ctG>ctA     |
| A | c.882C>T   | c.(880-882)tcC>tcT     |
| A | c.2540G>A  | c.(2539-2541)gGa>gAa   |
| C | c.152T>C   | c.(151-153)tTa>tCa     |

|   |            |                        |
|---|------------|------------------------|
| C | c.763C>G   | c.(763-765)Cca>Gca     |
| T | c.433C>T   | c.(433-435)Cct>Tct     |
| T | c.225C>T   | c.(223-225)ccC>ccT     |
| T | c.22C>T    | c.(22-24)Cag>Tag       |
| A | c.343G>A   | c.(343-345)Gtg>Atg     |
| T | c.20C>T    | c.(19-21)tCa>tTa       |
| A | c.695G>A   | c.(694-696)gGc>gAc     |
| T | c.949C>T   |                        |
| A | c.787C>T   | c.(787-789)Cct>Tct     |
| A | c.1071C>T  | c.(1069-1071)tcC>tcT   |
| A |            |                        |
| A |            |                        |
| T | c.410G>A   | c.(409-411)gGa>gAa     |
| T | c.1287G>A  | c.(1285-1287)aaG>aaA   |
| T | c.72C>T    | c.(70-72)ctC>ctT       |
| T | c.158C>T   | c.(157-159)cCt>cTt     |
| A | c.2075C>T  | c.(2074-2076)gCc>gTc   |
| A | c.1830G>A  | c.(1828-1830)gtG>gtA   |
| T | c.2486C>A  | c.(2485-2487)tCc>tAc   |
| A | c.1328C>T  | c.(1327-1329)tCc>tTc   |
| A | c.3243C>T  | c.(3241-3243)gtC>gtT   |
| A | c.146C>T   | c.(145-147)tCc>tTc     |
| C | c.747A>G   | c.(745-747)caA>caG     |
| T |            |                        |
| A | c.4137G>A  | c.(4135-4137)gtG>gtA   |
| A | c.263C>T   | c.(262-264)tCa>tTa     |
| A | c.534C>T   | c.(532-534)ctC>ctT     |
| T | c.797G>A   | c.(796-798)gGa>gAa     |
| A | c.110C>T   | c.(109-111)tCg>tTg     |
| A | c.2153C>A  | c.(2152-2154)tCc>tAc   |
| A | c.5994G>A  | c.(5992-5994)aaG>aaA   |
| A |            |                        |
| A | c.242G>A   | c.(241-243)gGt>gAt     |
| A | c.252C>T   | c.(250-252)atC>atT     |
| T | c.15759T>A | c.(15757-15759)tcT>tcA |
| A | c.814G>A   | c.(814-816)Gga>Aga     |
| A |            |                        |
| A | c.2272C>T  | c.(2272-2274)Cct>Tct   |
| A | c.2170C>T  | c.(2170-2172)Ctt>Ttt   |
| T |            |                        |
| A |            |                        |
| A | c.1026G>A  | c.(1024-1026)atG>atA   |
| T | c.309C>T   | c.(307-309)ttC>ttT     |

|   |               |                        |
|---|---------------|------------------------|
| T | c.669C>T      | c.(667-669)ttC>ttT     |
| A |               |                        |
| A | c.1553C>T     | c.(1552-1554)aCc>aTc   |
| A | c.614G>A      | c.(613-615)gGg>gAg     |
| A | c.1022G>A     | c.(1021-1023)gGa>gAa   |
| T | c.509C>T      | c.(508-510)cCt>cTt     |
| A | c.81G>A       | c.(79-81)gtG>gtA       |
| T | c.247G>A      | c.(247-249)Gag>Aag     |
| A |               |                        |
| A | c.900G>A      | c.(898-900)caG>caA     |
| T |               |                        |
| T | c.163C>T      | c.(163-165)Cga>Tga     |
| A | c.1059C>T     | c.(1057-1059)tcC>tcT   |
| T | c.576C>T      | c.(574-576)acC>acT     |
| A | c.4491G>A     | c.(4489-4491)ggG>ggA   |
| T |               |                        |
| A | c.800C>T      | c.(799-801)cCt>cTt     |
| T | c.2167C>T     | c.(2167-2169)Caa>Taa   |
| T | c.405G>A      | c.(403-405)ggG>ggA     |
| T | c.244C>T      | c.(244-246)Ctt>Ttt     |
| T | c.1856_splice | c.e20-1                |
| C | c.5817T>G     | c.(5815-5817)atT>atG   |
| T | c.1291C>T     | c.(1291-1293)Ctt>Ttt   |
| G | c.1065T>C     | c.(1063-1065)ttT>ttC   |
| T | c.264G>A      | c.(262-264)acG>acA     |
| A | c.948C>T      | c.(946-948)ttC>ttT     |
| T |               |                        |
| T | c.846C>A      | c.(844-846)ccC>ccA     |
| T | c.280C>T      | c.(280-282)Cag>Tag     |
| T | c.353G>A      | c.(352-354)gGg>gAg     |
| A | c.538C>T      | c.(538-540)Cca>Tca     |
| A | c.574G>A      | c.(574-576)Gaa>Aaa     |
| T |               |                        |
| T | c.319C>T      | c.(319-321)Ctg>Ttg     |
| A | c.601G>A      | c.(601-603)Gaa>Aaa     |
| T | c.613G>A      | c.(613-615)Gaa>Aaa     |
| T | c.1230G>A     | c.(1228-1230)agG>agA   |
| T | c.396G>A      | c.(394-396)agG>agA     |
| C | c.1395T>C     | c.(1393-1395)cgT>cgC   |
| A | c.16106G>A    | c.(16105-16107)gGa>gAa |
| A | c.66G>A       | c.(64-66)ctG>ctA       |
| T | c.2450G>A     | c.(2449-2451)cGa>cAa   |
| A | c.588C>T      | c.(586-588)gaC>gaT     |

|   |            |                        |
|---|------------|------------------------|
| T |            |                        |
| T | c.5346G>A  | c.(5344-5346)cgG>cgA   |
| A | c.1843C>T  | c.(1843-1845)Ctg>Ttg   |
| C | c.1657T>C  | c.(1657-1659)Ttg>Ctg   |
| A | c.814G>A   | c.(814-816)Gag>Aag     |
| A | c.26C>T    | c.(25-27)tCc>tTc       |
| T | c.216C>A   | c.(214-216)ctC>ctA     |
| C | c.18351A>C | c.(18349-18351)atA>atC |
| A | c.395C>T   | c.(394-396)cCc>cTc     |
| A | c.16G>A    | c.(16-18)Ggg>Agg       |
| A | c.1431C>T  | c.(1429-1431)ctC>ctT   |
| T | c.645C>T   | c.(643-645)ttC>ttT     |
| T | c.2151G>A  | c.(2149-2151)aaG>aaA   |
| A | c.48C>T    | c.(46-48)ttC>ttT       |
| C | c.414T>C   | c.(412-414)ggT>ggC     |
| A | c.818C>T   | c.(817-819)cCt>cTt     |
| A |            |                        |
| T | c.2016C>T  | c.(2014-2016)acC>acT   |
| T | c.9963C>T  | c.(9961-9963)ttC>ttT   |
| A | c.4564G>A  | c.(4564-4566)Gat>Aat   |
| T | c.1179C>T  | c.(1177-1179)gcC>gcT   |
| A | c.317C>T   | c.(316-318)tCa>tTa     |
| T | c.76C>T    | c.(76-78)Cct>Tct       |
| T | c.4212C>T  | c.(4210-4212)acC>acT   |
| A | c.43C>T    | c.(43-45)Cgg>Tgg       |
| T | c.2947C>T  | c.(2947-2949)Ccg>Tcg   |
| A | c.904C>T   | c.(904-906)Ccc>Tcc     |
| A | c.175G>A   | c.(175-177)Gac>Aac     |
| T |            |                        |
| G | c.100T>C   | c.(100-102)Ttg>Ctg     |
| T | c.2294C>T  | c.(2293-2295)tCc>tTc   |
| T |            |                        |
| T | c.663C>T   | c.(661-663)ctC>ctT     |
| A | c.1972C>T  | c.(1972-1974)Cta>Tta   |
| A | c.2101C>T  | c.(2101-2103)Cct>Tct   |
| A | c.455C>T   | c.(454-456)cCt>cTt     |
| T | c.1019C>T  | c.(1018-1020)tCa>tTa   |
| T | c.22405G>A | c.(22405-22407)Gag>Aag |
| A | c.4873G>A  | c.(4873-4875)Gat>Aat   |
| A | c.1612C>T  | c.(1612-1614)Cct>Tct   |
| A | c.974G>A   | c.(973-975)aGa>aAa     |
| T | c.2764G>A  | c.(2764-2766)Gag>Aag   |
| A | c.536C>T   | c.(535-537)gCc>gTc     |

|   |              |                      |
|---|--------------|----------------------|
| A | c.1399G>A    | c.(1399-1401)Gaa>Aaa |
| T |              |                      |
| A | c.122C>T     | c.(121-123)tCc>tTc   |
| T | c.7627C>T    | c.(7627-7629)Cga>Tga |
| A |              |                      |
| T | c.565G>A     | c.(565-567)Gaa>Aaa   |
| A |              |                      |
| T | c.747C>T     | c.(745-747)aaC>aaT   |
| A | c.1351C>T    | c.(1351-1353)Ccg>Tcg |
| T | c.281C>T     | c.(280-282)tCc>tTc   |
| C | c.1636A>G    | c.(1636-1638)Aaa>Gaa |
| T | c.1278G>A    | c.(1276-1278)caG>caA |
| T | c.1879G>A    | c.(1879-1881)Gag>Aag |
| A | c.250C>T     | c.(250-252)Cca>Tca   |
| T | c.1720G>A    | c.(1720-1722)Gcc>Acc |
| A | c.600C>T     | c.(598-600)acC>acT   |
| A | c.499G>A     | c.(499-501)Gag>Aag   |
| A |              |                      |
| T | c.3896G>A    | c.(3895-3897)gGa>gAa |
| T | c.1730C>T    | c.(1729-1731)cCt>cTt |
| A | c.4198C>T    | c.(4198-4200)Cat>Tat |
| A | c.3111C>T    | c.(3109-3111)atC>atT |
| A | c.663G>A     | c.(661-663)cgG>cgA   |
| T | c.1772C>T    | c.(1771-1773)cCc>cTc |
| A | c.654C>T     | c.(652-654)ccC>ccT   |
| T |              |                      |
| A |              |                      |
| T | c.535C>T     | c.(535-537)Cac>Tac   |
| T | c.909C>T     | c.(907-909)caC>caT   |
| A | c.210_splice | c.e4-1               |
| C | c.1562A>G    | c.(1561-1563)gAc>gGc |
| A | c.920C>T     | c.(919-921)tCa>tTa   |
| A | c.899G>A     | c.(898-900)cGt>cAt   |
| T |              |                      |
| T | c.5800C>T    | c.(5800-5802)Cgt>Tgt |
| A | c.1793C>T    | c.(1792-1794)cCc>cTc |
| A |              |                      |
| C |              |                      |
| A | c.851G>A     | c.(850-852)aGg>aAg   |
| T | c.396_splice | c.e3+1               |
| T | c.1683C>T    | c.(1681-1683)atC>atT |
| A | c.2883G>A    | c.(2881-2883)gaG>gaA |
| T | c.4051C>T    | c.(4051-4053)Cat>Tat |

|   |           |                      |
|---|-----------|----------------------|
| T | c.933C>T  | c.(931-933)gcC>gcT   |
| A | c.1387G>A | c.(1387-1389)Gac>Aac |
| A | c.213G>A  | c.(211-213)caG>caA   |
| T | c.1088G>A | c.(1087-1089)gGa>gAa |
| T | c.4611G>A | c.(4609-4611)aaG>aaA |
| A | c.180C>T  | c.(178-180)agC>agT   |
| T | c.898T>A  | c.(898-900)Ttt>Att   |
| A | c.137G>A  | c.(136-138)cGa>cAa   |
| A | c.3263C>T | c.(3262-3264)cCt>cTt |
| T | c.240C>T  | c.(238-240)aaC>aaT   |
| A | c.5477C>T | c.(5476-5478)tCc>tTc |
| A | c.421C>T  | c.(421-423)Cag>Tag   |
| T | c.644C>T  | c.(643-645)tCg>tTg   |
| A | c.523C>T  | c.(523-525)Ctc>Ttc   |
| T | c.2763T>A | c.(2761-2763)aaT>aaA |
| A | c.6293G>A | c.(6292-6294)gGg>gAg |
| A |           |                      |
| A | c.215G>A  | c.(214-216)gGa>gAa   |
| A | c.2093G>A | c.(2092-2094)gGg>gAg |
| C | c.244T>C  | c.(244-246)Ttg>Ctg   |
| T | c.678C>T  | c.(676-678)taC>taT   |
| T | c.88C>T   | c.(88-90)Ccc>Tcc     |
| A | c.1147A>T | c.(1147-1149)Aaa>Taa |
| T | c.346G>A  | c.(346-348)Gct>Act   |
| A | c.3244C>T | c.(3244-3246)Cat>Tat |
| A | c.308C>T  | c.(307-309)tCc>tTc   |
| A |           |                      |
| A | c.1168C>T | c.(1168-1170)Cac>Tac |
| A | c.1168G>A | c.(1168-1170)Ggc>Agc |
| T | c.160C>T  | c.(160-162)Caa>Taa   |
| A |           |                      |
| T | c.1272C>T | c.(1270-1272)ttC>ttT |
| A | c.153G>A  | c.(151-153)ccG>ccA   |
| T | c.1491G>A | c.(1489-1491)tgG>tgA |
| A | c.536C>T  | c.(535-537)cCt>cTt   |
| T | c.2818G>A | c.(2818-2820)Gat>Aat |
| T | c.481G>A  | c.(481-483)Gga>Aga   |
| A | c.1218G>A | c.(1216-1218)atG>atA |
| T | c.836C>T  | c.(835-837)tCc>tTc   |
| T | c.1939C>T | c.(1939-1941)Ctg>Ttg |
| T | c.463C>T  | c.(463-465)Cat>Tat   |
| A |           |                      |
| A | c.36G>A   | c.(34-36)agG>agA     |



|   |               |                      |
|---|---------------|----------------------|
| T | c.2180_splice | c.e19+1              |
| A | c.37A>T       | c.(37-39)Aag>Tag     |
| A | c.573C>T      | c.(571-573)ggC>ggT   |
| A | c.1000C>T     | c.(1000-1002)Cat>Tat |
| T |               |                      |
| T | c.432C>T      | c.(430-432)ccC>ccT   |
| A |               |                      |
| T |               |                      |
| A | c.575_splice  | c.e7+1               |
| T | c.94G>A       | c.(94-96)Gaa>Aaa     |
| T | c.1948C>T     | c.(1948-1950)Ctt>Ttt |
| C | c.769T>C      | c.(769-771)Tcc>Ccc   |
| T | c.76G>A       | c.(76-78)Gat>Aat     |
| A | c.1092_splice | c.e12-1              |
| A |               |                      |
| A | c.2401G>A     | c.(2401-2403)Gag>Aag |
| T | c.1729C>T     | c.(1729-1731)Cct>Tct |
| A | c.1454G>A     | c.(1453-1455)gGa>gAa |
| A | c.549C>T      | c.(547-549)atC>atT   |
| T | c.104G>A      | c.(103-105)cGa>cAa   |
| A | c.371C>T      | c.(370-372)tCt>tTt   |
| A | c.1177G>A     | c.(1177-1179)Gat>Aat |
| T | c.2388C>T     | c.(2386-2388)atC>atT |
| T | c.996C>T      | c.(994-996)ttC>ttT   |
| T | c.112G>A      | c.(112-114)Gaa>Aaa   |
| T | c.463C>T      | c.(463-465)Cat>Tat   |
| T | c.52G>A       | c.(52-54)Gaa>Aaa     |
| A | c.616_splice  | c.e7-1               |
| A | c.831G>A      | c.(829-831)agG>agA   |
| A |               |                      |
| T | c.831G>A      | c.(829-831)tgG>tgA   |
| A | c.257G>A      | c.(256-258)gGa>gAa   |
| A |               |                      |
| A | c.357G>A      | c.(355-357)gtG>gtA   |
| T | c.1756C>T     | c.(1756-1758)Ccg>Tcg |
| A | c.674C>T      | c.(673-675)tCc>tTc   |
| A | c.2973C>T     | c.(2971-2973)ccC>ccT |
| A | c.6326G>A     | c.(6325-6327)gGt>gAt |
| A |               |                      |
| T | c.465G>A      | c.(463-465)cgG>cgA   |
| T | c.1276G>A     | c.(1276-1278)Gaa>Aaa |
| T | c.345G>A      | c.(343-345)ctG>ctA   |
| A |               |                      |

|   |               |                        |
|---|---------------|------------------------|
| A |               |                        |
| T | c.99C>T       | c.(97-99)ctC>ctT       |
| A | c.5476G>T     | c.(5476-5478)Gag>Tag   |
| A | c.340G>A      | c.(340-342)Gga>Aga     |
| A | c.1708C>T     | c.(1708-1710)Cgc>Tgc   |
| C | c.3509C>G     | c.(3508-3510)tCc>tGc   |
| T | c.437G>A      | c.(436-438)cGa>cAa     |
| T | c.237C>T      | c.(235-237)acC>acT     |
| T |               |                        |
| A | c.920C>T      | c.(919-921)cCc>cTc     |
| T | c.1510A>T     | c.(1510-1512)Agc>Tgc   |
| T | c.3535_splice | c.e15-1                |
| T |               |                        |
| A |               |                        |
| A | c.1240G>T     | c.(1240-1242)Gag>Tag   |
| A | c.1239C>T     | c.(1237-1239)ttC>ttT   |
| A | c.59G>A       | c.(58-60)cGa>cAa       |
| A | c.10015G>A    | c.(10015-10017)Gaa>Aaa |
| T | c.282C>T      | c.(280-282)tcC>tcT     |
| T | c.216C>T      | c.(214-216)ccC>ccT     |
| A | c.1412G>A     | c.(1411-1413)gGa>gAa   |
| A | c.4160C>T     | c.(4159-4161)tCt>tTt   |
| T | c.5308C>T     | c.(5308-5310)Cat>Tat   |
| A | c.261A>T      | c.(259-261)aaA>aaT     |
| C | c.217G>C      |                        |
| T |               |                        |
| A | c.1251C>T     | c.(1249-1251)gaC>gaT   |
| A | c.474C>T      | c.(472-474)ttC>ttT     |
| A | c.13267G>T    | c.(13267-13269)Gac>Tac |
| T | c.823C>T      | c.(823-825)Cgt>Tgt     |
| A | c.802C>T      | c.(802-804)Cat>Tat     |
| A | c.1913C>T     | c.(1912-1914)cCa>cTa   |
| A | c.3G>A        | c.(1-3)atG>atA         |
| A | c.3431C>T     | c.(3430-3432)gCt>gTt   |
| A |               |                        |
| T | c.307G>A      | c.(307-309)Gaa>Aaa     |
| A |               |                        |
| G | c.483_splice  | c.e6+2                 |
| A | c.255C>T      | c.(253-255)ctC>ctT     |
| T |               |                        |
| T | c.676C>T      | c.(676-678)Cgt>Tgt     |
| T | c.1773C>T     | c.(1771-1773)ccC>ccT   |
| A | c.1645_splice | c.e17+1                |

|   |              |                      |
|---|--------------|----------------------|
| A | c.2980C>T    | c.(2980-2982)Cgg>Tgg |
| T |              |                      |
| T | c.203C>T     | c.(202-204)cCc>cTc   |
| A | c.1541G>A    |                      |
| T | c.426C>T     | c.(424-426)ctC>ctT   |
| T | c.1486G>A    | c.(1486-1488)Gat>Aat |
| T | c.3234C>T    | c.(3232-3234)atC>atT |
| A | c.730G>A     | c.(730-732)Gag>Aag   |
| C | c.660T>G     |                      |
| T |              |                      |
| A | c.702G>A     | c.(700-702)agG>agA   |
| T | c.1360C>T    | c.(1360-1362)Cct>Tct |
| A |              |                      |
| A | c.981C>A     | c.(979-981)ctC>ctA   |
| T | c.1175C>T    | c.(1174-1176)cCa>cTa |
| A |              |                      |
| T | c.613C>T     | c.(613-615)Ctg>Ttg   |
| T |              |                      |
| G |              |                      |
| C | c.530_splice | c.e3+2               |
| A | c.486C>T     | c.(484-486)ctC>ctT   |
| T | c.6772G>A    | c.(6772-6774)Ggg>Agg |
| A | c.3627G>A    | c.(3625-3627)tcG>tcA |
| T | c.115_splice | c.e2+1               |
| T | c.441C>T     | c.(439-441)gtC>gtT   |
| A | c.1411G>A    | c.(1411-1413)Gag>Aag |
| A | c.247G>A     | c.(247-249)Gaa>Aaa   |
| T | c.801T>A     | c.(799-801)ccT>ccA   |
| T | c.729C>T     | c.(727-729)ctC>ctT   |
| T | c.605C>T     | c.(604-606)tCg>tTg   |
| T | c.212C>T     | c.(211-213)cCg>cTg   |
| T | c.944G>A     | c.(943-945)cGa>cAa   |
| A | c.123C>T     | c.(121-123)tcC>tcT   |
| T | c.617G>A     | c.(616-618)gGg>gAg   |
| A |              |                      |
| G | c.638C>G     | c.(637-639)cCc>cGc   |
| A |              |                      |
| G | c.306T>G     | c.(304-306)agT>agG   |
| A | c.312A>T     | c.(310-312)aaA>aaT   |
| A | c.6691G>A    | c.(6691-6693)Gaa>Aaa |
| T | c.1357C>T    | c.(1357-1359)Ccc>Tcc |
| A |              |                      |
| A | c.1416C>T    | c.(1414-1416)ccC>ccT |

|   |           |                      |
|---|-----------|----------------------|
| A | c.338C>T  | c.(337-339)tCc>tTc   |
| T | c.385G>A  | c.(385-387)Gta>Ata   |
| T | c.166C>T  | c.(166-168)Cgg>Tgg   |
| C | c.453C>G  | c.(451-453)acC>acG   |
| C |           |                      |
| T |           |                      |
| A | c.518G>A  | c.(517-519)gGa>gAa   |
| A | c.347G>A  | c.(346-348)gGg>gAg   |
| A | c.1162C>T | c.(1162-1164)Ctg>Ttg |
| A | c.328C>T  | c.(328-330)Ctt>Ttt   |
| A | c.818C>T  | c.(817-819)tCc>tTc   |
| T | c.1087G>A | c.(1087-1089)Gga>Aga |
| T |           |                      |
| T | c.5404C>T | c.(5404-5406)Cca>Tca |
| A | c.2058C>T | c.(2056-2058)acC>acT |
| C | c.796A>G  | c.(796-798)Acc>Gcc   |
| C | c.871T>C  | c.(871-873)Tcc>Ccc   |
| T |           |                      |
| A | c.669G>A  | c.(667-669)gtG>gtA   |
| T | c.2901G>A | c.(2899-2901)aaG>aaA |
| A | c.373C>T  | c.(373-375)Cag>Tag   |
| T | c.79G>A   | c.(79-81)Gaa>Aaa     |
| T | c.1682G>A | c.(1681-1683)gGa>gAa |
| A |           |                      |
| T | c.1961G>A | c.(1960-1962)gGg>gAg |
| T |           |                      |
| T | c.620G>A  | c.(619-621)tGg>tAg   |
| T | c.1009G>A | c.(1009-1011)Gaa>Aaa |
| A | c.534C>T  | c.(532-534)atC>atT   |
| T |           |                      |
| T | c.4717T>A | c.(4717-4719)Ttg>Atg |
| A | c.3023G>A | c.(3022-3024)aGa>aAa |
| A | c.181G>A  | c.(181-183)Ggg>Agg   |
| A | c.532C>T  | c.(532-534)Cag>Tag   |
| T | c.1401G>A | c.(1399-1401)ggG>ggA |
| T | c.505C>T  | c.(505-507)Cgg>Tgg   |
| A |           |                      |
| A | c.827C>T  | c.(826-828)cCa>cTa   |
| T | c.2803G>A | c.(2803-2805)Ggt>Agt |
| A | c.1049G>A | c.(1048-1050)gGc>gAc |
| T | c.39G>A   | c.(37-39)gaG>gaA     |
| A | c.738C>T  | c.(736-738)tgC>tgT   |
| A | c.1194G>A | c.(1192-1194)acG>acA |

|   |              |                      |
|---|--------------|----------------------|
| T |              |                      |
| A |              |                      |
| A | c.2323C>T    | c.(2323-2325)Ctc>Ttc |
| A | c.1329G>A    |                      |
| A | c.3307C>T    | c.(3307-3309)Cac>Tac |
| A | c.406C>T     | c.(406-408)Cct>Tct   |
| A | c.2298G>A    | c.(2296-2298)aaG>aaA |
| T | c.2644G>A    | c.(2644-2646)Gat>Aat |
| A | c.981_splice | c.e11-1              |
| T | c.1240G>A    | c.(1240-1242)Gtg>Atg |
| A | c.1813G>A    | c.(1813-1815)Gag>Aag |
| T | c.139G>A     | c.(139-141)Gcc>Acc   |
| T | c.867C>T     | c.(865-867)ggC>ggT   |
| A | c.678C>T     | c.(676-678)ctC>ctT   |
| A |              |                      |
| A | c.768C>T     | c.(766-768)ctC>ctT   |
| T | c.336C>T     | c.(334-336)atC>atT   |
| T | c.1783C>T    | c.(1783-1785)Cca>Tca |
| A | c.1888C>T    | c.(1888-1890)Cct>Tct |
| A |              |                      |
| T | c.1681G>A    | c.(1681-1683)Gga>Aga |
| T | c.1087G>A    | c.(1087-1089)Gag>Aag |
| T | c.1725G>A    | c.(1723-1725)ctG>ctA |
| T | c.1219C>T    | c.(1219-1221)Cca>Tca |
| A |              |                      |
| A | c.687G>A     | c.(685-687)aaG>aaA   |
| T | c.633C>T     |                      |
| G | c.1008A>G    | c.(1006-1008)cgA>cgG |
| T | c.4495G>A    | c.(4495-4497)Gaa>Aaa |
| T | c.599G>A     | c.(598-600)gGa>gAa   |
| G | c.806T>C     | c.(805-807)tTc>tCc   |
| C | c.2160T>C    | c.(2158-2160)agT>agC |
| T | c.1734G>A    | c.(1732-1734)agG>agA |
| T | c.2188C>T    | c.(2188-2190)Cgt>Tgt |
| G | c.1311A>G    | c.(1309-1311)gaA>gaG |
| A | c.751C>T     | c.(751-753)Cct>Tct   |
| T | c.307G>A     | c.(307-309)Ggc>Agc   |
| A | c.545G>A     | c.(544-546)gGa>gAa   |
| T | c.1873G>T    | c.(1873-1875)Gag>Tag |
| T |              |                      |
| A | c.676G>A     | c.(676-678)Ggc>Agc   |
| A | c.544C>T     | c.(544-546)Cct>Tct   |
| A | c.7C>T       |                      |

|   |           |                      |
|---|-----------|----------------------|
| T | c.223G>A  | c.(223-225)Gaa>Aaa   |
| A | c.564C>T  | c.(562-564)ttC>ttT   |
| A | c.360C>T  |                      |
| A | c.1726A>T | c.(1726-1728)Aaa>Taa |
| T | c.1199C>T | c.(1198-1200)tCc>tTc |
| T |           |                      |
| A | c.264C>T  | c.(262-264)tcC>tcT   |
| A | c.1379C>T | c.(1378-1380)tCt>tTt |
| T |           |                      |
| A |           |                      |
| A | c.2446G>A | c.(2446-2448)Gcc>Acc |
| A | c.749C>T  | c.(748-750)cCt>cTt   |
| T | c.437C>T  | c.(436-438)cCg>cTg   |
| A | c.1573G>A | c.(1573-1575)Gga>Aga |
| T | c.2593G>A | c.(2593-2595)Gag>Aag |
| A | c.1080G>A | c.(1078-1080)gaG>gaA |
| A |           |                      |
| T |           |                      |
| G |           |                      |
| T | c.1538G>A | c.(1537-1539)aGa>aAa |
| A | c.2133G>A | c.(2131-2133)cgG>cgA |
| T | c.2119C>T | c.(2119-2121)Cca>Tca |
| T | c.2345C>T | c.(2344-2346)cCc>cTc |
| A | c.610G>A  | c.(610-612)Gcc>Acc   |
| A | c.1244C>A | c.(1243-1245)cCc>cAc |
| A | c.263G>A  | c.(262-264)cGa>cAa   |
| G |           |                      |
| T |           |                      |
| A | c.1867G>A | c.(1867-1869)Ggt>Agt |
| A | c.553G>A  | c.(553-555)Gtg>Atg   |
| T |           |                      |
| A | c.166C>T  | c.(166-168)Cgt>Tgt   |
| A | c.1096G>T | c.(1096-1098)Gcc>Tcc |
| G | c.364T>C  | c.(364-366)Tat>Cat   |
| T |           |                      |
| A | c.1053C>T | c.(1051-1053)tcC>tcT |
| A | c.1261C>T | c.(1261-1263)Cat>Tat |
| T | c.1260G>A | c.(1258-1260)ggG>ggA |
| A | c.3598C>T | c.(3598-3600)Ccc>Tcc |
| A | c.821C>T  | c.(820-822)cCt>cTt   |
| T | c.1615G>A | c.(1615-1617)Gac>Aac |
| T |           |                      |
| A | c.851G>A  |                      |

|   |               |                        |
|---|---------------|------------------------|
| T | c.4561G>A     | c.(4561-4563)Gag>Aag   |
| A |               |                        |
| T | c.10038C>T    | c.(10036-10038)ctC>ctT |
| T | c.1205C>T     | c.(1204-1206)cCt>cTt   |
| A | c.6008G>A     | c.(6007-6009)aGg>aAg   |
| A | c.1320C>T     | c.(1318-1320)gtC>gtT   |
| T | c.4261G>A     | c.(4261-4263)Gga>Aga   |
| T |               |                        |
| A | c.518G>A      | c.(517-519)gGa>gAa     |
| A | c.210C>T      | c.(208-210)ctC>ctT     |
| C | c.633A>G      | c.(631-633)gcA>gcG     |
| T | c.1100G>A     | c.(1099-1101)aGg>aAg   |
| T |               |                        |
| A | c.305G>A      | c.(304-306)cGg>cAg     |
| T | c.1383C>T     | c.(1381-1383)atC>atT   |
| T | c.1377G>A     | c.(1375-1377)cgG>cgA   |
| A | c.206G>A      | c.(205-207)gGa>gAa     |
| T | c.107G>A      | c.(106-108)aGt>aAt     |
| G | c.1055G>C     | c.(1054-1056)gGc>gCc   |
| T | c.2344C>T     | c.(2344-2346)Cga>Tga   |
| T | c.3006C>T     | c.(3004-3006)tcC>tcT   |
| T |               |                        |
| T | c.858C>T      | c.(856-858)tcC>tcT     |
| T | c.731C>T      | c.(730-732)tCc>tTc     |
| T | c.2658C>T     | c.(2656-2658)acC>acT   |
| A |               |                        |
| A | c.345G>A      | c.(343-345)caG>caA     |
| T | c.370G>A      | c.(370-372)Gga>Aga     |
| T |               |                        |
| T | c.132C>T      | c.(130-132)atC>atT     |
| C | c.1108_splice | c.e6-1                 |
| T | c.2781G>A     | c.(2779-2781)gtG>gtA   |
| A | c.2136C>T     | c.(2134-2136)atC>atT   |
| T |               |                        |
| G | c.712T>C      | c.(712-714)Ttc>Ctc     |
| T | c.1230G>A     | c.(1228-1230)ggG>ggA   |
| T | c.3358G>A     | c.(3358-3360)Gtt>Att   |
| A | c.1070C>T     | c.(1069-1071)gCg>gTg   |
| A |               |                        |
| A | c.1655C>T     | c.(1654-1656)tCc>tTc   |
| T | c.360_splice  | c.e3+1                 |
| A | c.55C>A       | c.(55-57)Ctg>Atg       |
| C | c.36T>C       | c.(34-36)ttT>ttC       |

|   |               |                      |
|---|---------------|----------------------|
| C | c.1218G>C     | c.(1216-1218)aaG>aaC |
| A | c.550G>A      | c.(550-552)Ggt>Agt   |
| A | c.1328C>T     | c.(1327-1329)tCc>tTc |
| G |               |                      |
| A | c.1255C>T     | c.(1255-1257)Cgg>Tgg |
| A |               |                      |
| A | c.1028G>A     | c.(1027-1029)cGa>cAa |
| T | c.1319C>T     | c.(1318-1320)gCc>gTc |
| T | c.241G>A      | c.(241-243)Gcc>Acc   |
| A | c.658C>T      | c.(658-660)Cct>Tct   |
| T | c.972C>T      | c.(970-972)gaC>gaT   |
| A | c.3510C>T     | c.(3508-3510)tcC>tcT |
| T | c.224C>T      | c.(223-225)gCc>gTc   |
| T | c.96C>T       | c.(94-96)ttC>ttT     |
| T | c.1578C>T     | c.(1576-1578)gcC>gcT |
| T | c.2310C>T     | c.(2308-2310)gtC>gtT |
| C | c.660A>G      | c.(658-660)ctA>ctG   |
| T | c.807G>A      | c.(805-807)gaG>gaA   |
| A | c.803G>A      | c.(802-804)gGa>gAa   |
| A |               |                      |
| T | c.468C>T      | c.(466-468)ctC>ctT   |
| T | c.573C>T      | c.(571-573)ccC>ccT   |
| A | c.5611C>T     | c.(5611-5613)Cct>Tct |
| A | c.1380C>T     | c.(1378-1380)caC>caT |
| A |               |                      |
| C | c.3021A>C     | c.(3019-3021)aaA>aaC |
| T | c.724G>A      | c.(724-726)Gaa>Aaa   |
| T | c.981C>T      | c.(979-981)atC>atT   |
| T | c.3246_splice | c.e26-1              |
| A | c.1267G>A     | c.(1267-1269)Gag>Aag |
| A |               |                      |
| A | c.2057C>T     | c.(2056-2058)aCc>aTc |
| T | c.178C>T      | c.(178-180)Cct>Tct   |
| T |               |                      |
| A | c.5983C>T     | c.(5983-5985)Cta>Tta |
| A | c.1384G>A     | c.(1384-1386)Gta>Ata |
| A | c.546C>T      | c.(544-546)ttC>ttT   |
| T | c.2280G>A     | c.(2278-2280)aaG>aaA |
| T | c.483G>A      |                      |
| A | c.2707C>T     | c.(2707-2709)Ccc>Tcc |
| A | c.556G>A      | c.(556-558)Ggc>Agc   |
| T |               |                      |
| T | c.2066C>T     | c.(2065-2067)cCc>cTc |



|   |               |                      |
|---|---------------|----------------------|
| T | c.51C>T       | c.(49-51)ctC>ctT     |
| T |               |                      |
| A |               |                      |
| A | c.996G>A      | c.(994-996)taG>taA   |
| A | c.1515G>A     | c.(1513-1515)gtG>gtA |
| A |               |                      |
| A | c.492C>T      | c.(490-492)ttC>ttT   |
| T | c.735G>A      | c.(733-735)aaG>aaA   |
| T |               |                      |
| T | c.318C>T      | c.(316-318)ccC>ccT   |
| A | c.715A>T      | c.(715-717)Ata>Tta   |
| A |               |                      |
| A | c.1865G>A     | c.(1864-1866)gGa>gAa |
| T |               |                      |
| A | c.163G>A      | c.(163-165)Ggg>Agg   |
| T | c.5865C>T     | c.(5863-5865)acC>acT |
| T | c.147C>T      | c.(145-147)ccC>ccT   |
| A |               |                      |
| A | c.84C>T       | c.(82-84)atC>atT     |
| A |               |                      |
| A |               |                      |
| T |               |                      |
| T | c.1324C>T     | c.(1324-1326)Cgc>Tgc |
| A | c.1416G>A     | c.(1414-1416)gcG>gcA |
| C |               |                      |
| A | c.441G>A      | c.(439-441)cgG>cgA   |
| A | c.1500G>A     | c.(1498-1500)aaG>aaA |
| T | c.3015A>T     | c.(3013-3015)gcA>gcT |
| A | c.12G>A       | c.(10-12)atG>atA     |
| A | c.575_splice  | c.e7+1               |
| G | c.2568_splice | c.e20+1              |
| A |               |                      |
| T | c.783C>T      | c.(781-783)gcC>gcT   |
| T | c.517G>A      | c.(517-519)Gaa>Aaa   |
| T | c.869G>A      | c.(868-870)cGg>cAg   |
| G | c.1444T>G     | c.(1444-1446)Tac>Gac |
| T | c.2490G>A     | c.(2488-2490)aaG>aaA |
| T | c.396G>A      | c.(394-396)atG>atA   |
| A |               |                      |
| T |               |                      |
| A |               |                      |
| A | c.1153C>T     | c.(1153-1155)Cca>Tca |

|   |              |                      |
|---|--------------|----------------------|
| A | c.195C>T     | c.(193-195)acC>acT   |
| A | c.346G>A     | c.(346-348)Gag>Aag   |
| A | c.798G>A     | c.(796-798)ctG>ctA   |
| T | c.741C>T     | c.(739-741)tcC>tcT   |
| A |              |                      |
| A |              |                      |
| T | c.2366G>A    | c.(2365-2367)cGa>cAa |
| G | c.917A>G     | c.(916-918)aAa>aGa   |
| T | c.5345G>A    | c.(5344-5346)cGg>cAg |
| T | c.90G>A      | c.(88-90)tgG>tgA     |
| T | c.506_splice | c.e3+1               |
| T | c.2165C>T    | c.(2164-2166)tCg>tTg |
| A |              |                      |
| A | c.1188G>A    | c.(1186-1188)ccG>ccA |
| A | c.100T>A     | c.(100-102)Ttc>Atc   |
| T | c.1005G>A    | c.(1003-1005)gaG>gaA |
| T | c.240C>T     | c.(238-240)tcC>tcT   |
| T | c.559G>A     | c.(559-561)Ggc>Agc   |
| T | c.1026C>T    | c.(1024-1026)atC>atT |
| T | c.369C>T     | c.(367-369)atC>atT   |
| A | c.3999C>T    | c.(3997-3999)ccC>ccT |
| A | c.2574C>T    | c.(2572-2574)ttC>ttT |
| A | c.3754C>T    | c.(3754-3756)Cct>Tct |
| T | c.3765C>T    | c.(3763-3765)acC>acT |
| T | c.975A>T     | c.(973-975)agA>agT   |
| T | c.1008G>A    | c.(1006-1008)agG>agA |
| A | c.2632C>T    | c.(2632-2634)Ctg>Ttg |
| A | c.6266C>T    | c.(6265-6267)tCc>tTc |
| A | c.1887G>A    | c.(1885-1887)atG>atA |
| A |              |                      |
| T | c.1572C>T    | c.(1570-1572)atC>atT |
| A | c.517G>A     | c.(517-519)Gga>Aga   |
| A | c.2515C>T    | c.(2515-2517)Ccg>Tcg |
| C | c.4112C>G    | c.(4111-4113)cCg>cGg |
| A | c.345C>T     | c.(343-345)atC>atT   |
| T | c.218C>T     | c.(217-219)gCc>gTc   |
| T | c.7697G>A    | c.(7696-7698)tGg>tAg |
| A |              |                      |
| T | c.3602G>A    | c.(3601-3603)aGg>aAg |
| A |              |                      |
| A | c.1839G>A    | c.(1837-1839)gtG>gtA |
| T | c.983C>T     | c.(982-984)cCa>cTa   |
| A | c.3289G>A    | c.(3289-3291)Gac>Aac |

|   |            |                        |
|---|------------|------------------------|
| A | c.4124C>T  | c.(4123-4125)cCc>cTc   |
| A | c.720G>A   | c.(718-720)agG>agA     |
| T | c.4210G>A  | c.(4210-4212)Gaa>Aaa   |
| A |            |                        |
| A | c.682C>T   | c.(682-684)Cgt>Tgt     |
| A | c.699C>T   | c.(697-699)tcC>tcT     |
| A | c.60G>T    | c.(58-60)gaG>gaT       |
| A | c.81G>A    | c.(79-81)tcG>tcA       |
| A |            |                        |
| A | c.2215C>T  | c.(2215-2217)Ctg>Ttg   |
| T | c.1925C>A  | c.(1924-1926)gCt>gAt   |
| T | c.11331C>T | c.(11329-11331)atC>atT |
| A |            |                        |
| A | c.2614G>A  | c.(2614-2616)Gaa>Aaa   |
| A | c.1817G>A  | c.(1816-1818)gGg>gAg   |
| T | c.2661G>A  | c.(2659-2661)ggG>ggA   |
| A | c.1114G>A  | c.(1114-1116)Gga>Aga   |
| T | c.696C>T   | c.(694-696)ttC>ttT     |
| T |            |                        |
| A | c.1824G>A  | c.(1822-1824)aaG>aaA   |
| T |            |                        |
| A | c.2371T>A  | c.(2371-2373)Ttc>Atc   |
| T | c.494G>A   | c.(493-495)tGg>tAg     |
| A | c.2283A>T  | c.(2281-2283)cgA>cgT   |
| T | c.194C>T   | c.(193-195)gCc>gTc     |
| A | c.688C>T   | c.(688-690)Ccc>Tcc     |
| G | c.295G>C   | c.(295-297)Gat>Cat     |
| T |            |                        |
| A | c.799G>A   | c.(799-801)Gcc>Acc     |
| A | c.379G>A   | c.(379-381)Gaa>Aaa     |
| A | c.1084G>A  | c.(1084-1086)Gac>Aac   |
| T | c.3913G>A  | c.(3913-3915)Gat>Aat   |
| A | c.1656C>T  | c.(1654-1656)ttC>ttT   |
| A |            |                        |
| A | c.1350C>T  | c.(1348-1350)tcC>tcT   |
| A | c.7766C>T  | c.(7765-7767)cCc>cTc   |
| A |            |                        |
| A | c.8915G>A  | c.(8914-8916)cGg>cAg   |
| T | c.134G>A   | c.(133-135)gGa>gAa     |
| T |            |                        |
| A | c.7343C>A  | c.(7342-7344)tCa>tAa   |
| T | c.72C>T    | c.(70-72)atC>atT       |
| T |            |                        |

|   |           |                      |
|---|-----------|----------------------|
| T | c.1076G>A | c.(1075-1077)cGa>cAa |
| T | c.1359C>T |                      |
| A | c.990G>A  | c.(988-990)ggG>ggA   |
| A |           |                      |
| T | c.771C>T  | c.(769-771)ttC>ttT   |
| A | c.5086G>A | c.(5086-5088)Gaa>Aaa |
| A | c.780C>T  | c.(778-780)atC>atT   |
| T | c.889C>T  | c.(889-891)Cct>Tct   |
| T | c.896C>T  | c.(895-897)tCc>tTc   |
| C | c.1444A>G | c.(1444-1446)Aat>Gat |
| T | c.4731T>A | c.(4729-4731)ctT>ctA |
| T | c.3024C>T | c.(3022-3024)atC>atT |
| T | c.128C>T  | c.(127-129)cCg>cTg   |
| A | c.2606C>T | c.(2605-2607)aCc>aTc |
| T |           |                      |
| G | c.1144A>C |                      |
| A | c.805G>A  | c.(805-807)Gag>Aag   |
| A | c.1198C>T | c.(1198-1200)Cgt>Tgt |
| T | c.978G>A  | c.(976-978)acG>acA   |
| T |           |                      |
| T |           |                      |
| T | c.853G>A  | c.(853-855)Gag>Aag   |
| T | c.46G>A   | c.(46-48)Gat>Aat     |
| A | c.78G>A   | c.(76-78)ccG>ccA     |
| T |           |                      |
| A | c.3151C>T | c.(3151-3153)Cag>Tag |
| T | c.385T>A  | c.(385-387)Tac>Aac   |
| T | c.3789G>A | c.(3787-3789)gtG>gtA |
| G | c.7522A>C | c.(7522-7524)Aaa>Caa |
| A | c.963C>T  | c.(961-963)acC>acT   |
| A | c.20C>T   | c.(19-21)tCg>tTg     |
| A | c.3862G>A | c.(3862-3864)Gat>Aat |
| A |           |                      |
| A |           |                      |
| A | c.1344C>T | c.(1342-1344)ccC>ccT |
| G | c.213G>C  | c.(211-213)gcG>gcC   |
| A | c.81C>T   | c.(79-81)aaC>aaT     |
| A | c.172C>T  | c.(172-174)Cct>Tct   |
| T | c.299G>A  | c.(298-300)gGg>gAg   |
| T | c.860G>A  | c.(859-861)cGa>cAa   |
| T | c.1240C>T | c.(1240-1242)Cac>Tac |
| T |           |                      |
| T |           |                      |

|   |               |                      |
|---|---------------|----------------------|
| A | c.1742G>A     | c.(1741-1743)aGa>aAa |
| A |               |                      |
| T | c.606C>T      | c.(604-606)gtC>gtT   |
| T | c.498C>T      | c.(496-498)ttC>ttT   |
| A | c.3722C>T     | c.(3721-3723)tCc>tTc |
| T |               |                      |
| T |               |                      |
| A | c.3779_splice | c.e25-1              |
| A | c.182G>A      | c.(181-183)cGg>cAg   |
| A | c.389C>T      | c.(388-390)tCc>tTc   |
| T | c.361C>T      | c.(361-363)Cgt>Tgt   |
| A |               |                      |
| T | c.948C>T      |                      |
| T |               |                      |
| T |               |                      |
| T | c.1992G>A     | c.(1990-1992)tgG>tgA |
| G | c.1971_splice | c.e2-1               |
| T | c.766G>A      | c.(766-768)Gac>Aac   |
| T | c.1492C>T     | c.(1492-1494)Ctg>Ttg |
| T | c.2727G>A     |                      |
| A |               |                      |
| A | c.280T>A      | c.(280-282)Tac>Aac   |
| T | c.471C>T      | c.(469-471)ttC>ttT   |
| T | c.438C>T      | c.(436-438)tcC>tcT   |
| T | c.6659C>T     | c.(6658-6660)aCc>aTc |
| A | c.1905C>T     | c.(1903-1905)ttC>ttT |
| T | c.1244C>T     | c.(1243-1245)tCa>tTa |
| G |               |                      |
| T | c.577G>A      | c.(577-579)Gaa>Aaa   |
| T | c.1103C>T     | c.(1102-1104)aCc>aTc |
| A | c.195C>T      | c.(193-195)atC>atT   |
| A | c.813G>A      | c.(811-813)ctG>ctA   |
| C |               |                      |
| T | c.1310C>T     | c.(1309-1311)cCa>cTa |
| T | c.3562C>T     | c.(3562-3564)Cgg>Tgg |
| T | c.882G>A      | c.(880-882)atG>atA   |
| A |               |                      |
| A | c.1393C>T     | c.(1393-1395)Cca>Tca |
| T | c.1009C>T     | c.(1009-1011)Ccc>Tcc |
| A | c.277C>T      | c.(277-279)Ctg>Ttg   |
| A |               |                      |
| T | c.476C>T      | c.(475-477)tCt>tTt   |
| A | c.170G>A      | c.(169-171)tGc>tAc   |

|   |           |                      |
|---|-----------|----------------------|
| C | c.1810A>G | c.(1810-1812)Aag>Gag |
| C | c.791T>C  | c.(790-792)tTt>tCt   |
| A |           |                      |
| A | c.739G>A  | c.(739-741)Gag>Aag   |
| A | c.169G>A  | c.(169-171)Gga>Aga   |
| T |           |                      |
| T | c.618G>A  | c.(616-618)ggG>ggA   |
| T | c.1171C>T | c.(1171-1173)Ccg>Tcg |
| T | c.931G>A  | c.(931-933)Gaa>Aaa   |
| A | c.679C>T  | c.(679-681)Cca>Tca   |
| A | c.130C>T  | c.(130-132)Cgg>Tgg   |
| A | c.4045C>T | c.(4045-4047)Cgt>Tgt |
| A | c.1859G>A | c.(1858-1860)gGg>gAg |
| C | c.1196C>G | c.(1195-1197)gCc>gGc |
| G | c.68A>G   | c.(67-69)cAa>cGa     |
| T | c.1002C>T | c.(1000-1002)atC>atT |
| T | c.3123C>T | c.(3121-3123)ttC>ttT |
| T | c.1172C>T | c.(1171-1173)tCt>tTt |
| T | c.1702C>T | c.(1702-1704)Cat>Tat |
| T | c.6129G>A | c.(6127-6129)atG>atA |
| T | c.785C>T  | c.(784-786)tCg>tTg   |
| A | c.584C>T  |                      |
| A | c.32G>A   | c.(31-33)gGg>gAg     |
| T | c.961G>A  | c.(961-963)Gaa>Aaa   |
| A | c.1197C>T | c.(1195-1197)gcC>gcT |
| C | c.5436T>G | c.(5434-5436)gaT>gaG |
| T | c.181G>A  | c.(181-183)Gcc>Acc   |
| T |           |                      |
| A |           |                      |
| A | c.108G>A  | c.(106-108)tcG>tcA   |
| A |           |                      |
| A |           |                      |
| A | c.1138G>A | c.(1138-1140)Gga>Aga |
| T | c.3516C>T | c.(3514-3516)ctC>ctT |
| A |           |                      |
| T | c.178C>T  | c.(178-180)Cac>Tac   |
| T | c.702G>A  | c.(700-702)agG>agA   |
| A | c.692C>T  | c.(691-693)tCa>tTa   |
| C | c.1018T>C | c.(1018-1020)Ttg>Ctg |
| A | c.5885G>A | c.(5884-5886)gGg>gAg |
| A | c.510C>T  | c.(508-510)acC>acT   |
| T | c.3100A>T | c.(3100-3102)Aac>Tac |
| T | c.1176C>T | c.(1174-1176)gtC>gtT |

|   |            |                        |
|---|------------|------------------------|
| A | c.2562G>A  | c.(2560-2562)agG>agA   |
| T | c.1379C>T  | c.(1378-1380)cCt>cTt   |
| T | c.2055C>T  | c.(2053-2055)atC>atT   |
| A | c.1487T>A  | c.(1486-1488)tTt>tAt   |
| A |            |                        |
| T | c.601C>T   | c.(601-603)Ctg>Ttg     |
| A | c.963G>A   | c.(961-963)atG>atA     |
| T |            |                        |
| A |            |                        |
| T |            |                        |
| G | c.3362T>C  | c.(3361-3363)gTt>gCt   |
| T | c.1425G>A  | c.(1423-1425)ctG>ctA   |
| T | c.265C>T   | c.(265-267)Ctg>Ttg     |
| T | c.50C>T    | c.(49-51)cCc>cTc       |
| T | c.2372C>T  | c.(2371-2373)tCa>tTa   |
| T | c.10899G>A | c.(10897-10899)tgG>tgA |
| A | c.1516G>A  | c.(1516-1518)Ggc>Agc   |
| T | c.976C>T   | c.(976-978)Ccc>Tcc     |
| T | c.191C>T   | c.(190-192)tCc>tTc     |
| T | c.938C>T   | c.(937-939)cCg>cTg     |
| T | c.3250C>T  | c.(3250-3252)Cca>Tca   |
| T | c.910C>T   | c.(910-912)Cgc>Tgc     |
| T | c.349G>A   | c.(349-351)Ggg>Agg     |
| T | c.856G>A   | c.(856-858)Gag>Aag     |
| T | c.1016G>A  |                        |
| A | c.1011C>T  | c.(1009-1011)atC>atT   |
| T | c.9980G>A  | c.(9979-9981)aGa>aAa   |
| T | c.3380C>T  | c.(3379-3381)tCa>tTa   |
| T | c.425C>T   | c.(424-426)cCt>cTt     |
| T |            |                        |
| A | c.43454G>T | c.(43453-43455)gGa>gTa |
| A | c.3845C>T  | c.(3844-3846)cCa>cTa   |
| T | c.384C>T   | c.(382-384)atC>atT     |
| T | c.844C>T   | c.(844-846)Cgt>Tgt     |
| T | c.1287C>T  | c.(1285-1287)agC>agT   |
| A | c.284C>T   | c.(283-285)tCa>tTa     |
| A | c.551G>A   | c.(550-552)tGg>tAg     |
| T | c.293G>A   | c.(292-294)cGg>cAg     |
| A |            |                        |
| A | c.1447C>T  |                        |
| A | c.1263C>T  | c.(1261-1263)ttC>ttT   |
| A | c.1107C>T  | c.(1105-1107)ttC>ttT   |
| T | c.1983C>T  | c.(1981-1983)ttC>ttT   |

|   |               |                        |
|---|---------------|------------------------|
| A |               |                        |
| T | c.3074G>A     | c.(3073-3075)gGa>gAa   |
| A |               |                        |
| A | c.2397C>T     | c.(2395-2397)atC>atT   |
| T | c.715G>A      | c.(715-717)Gag>Aag     |
| A | c.7136G>A     | c.(7135-7137)gGa>gAa   |
| A | c.6832G>A     | c.(6832-6834)Gag>Aag   |
| A | c.4538C>T     | c.(4537-4539)tCc>tTc   |
| A | c.1597C>T     | c.(1597-1599)Cga>Tga   |
| T | c.2903G>A     | c.(2902-2904)aGt>aAt   |
| T | c.253G>A      | c.(253-255)Gat>Aat     |
| T | c.1301C>T     | c.(1300-1302)gCc>gTc   |
| A | c.65C>T       | c.(64-66)cCc>cTc       |
| T | c.198C>T      | c.(196-198)ttC>ttT     |
| A |               |                        |
| G | c.859_splice  | c.e10-1                |
| A | c.1261C>T     | c.(1261-1263)Cat>Tat   |
| T | c.331C>T      | c.(331-333)Cag>Tag     |
| A | c.30292C>T    | c.(30292-30294)Cct>Tct |
| T | c.3895G>A     | c.(3895-3897)Gga>Aga   |
| C |               |                        |
| T | c.544G>A      | c.(544-546)Gaa>Aaa     |
| T | c.204C>T      | c.(202-204)atC>atT     |
| A | c.4472G>A     | c.(4471-4473)gGa>gAa   |
| A | c.1067C>T     | c.(1066-1068)tCc>tTc   |
| T | c.207C>T      | c.(205-207)ctC>ctT     |
| A |               |                        |
| T | c.70G>A       | c.(70-72)Gat>Aat       |
| T | c.637C>T      | c.(637-639)Ccc>Tcc     |
| C | c.2479T>C     | c.(2479-2481)Tcg>Ccg   |
| T |               |                        |
| T | c.268C>T      | c.(268-270)Cca>Tca     |
| A | c.955C>T      | c.(955-957)Cga>Tga     |
| A | c.169C>T      | c.(169-171)Ctg>Ttg     |
| A | c.692C>T      | c.(691-693)aCc>aTc     |
| T | c.1465G>A     | c.(1465-1467)Gac>Aac   |
| A | c.33C>T       | c.(31-33)gtC>gtT       |
| A | c.675C>T      | c.(673-675)atC>atT     |
| G |               |                        |
| A |               |                        |
| A | c.2126_splice | c.e29-1                |
| A | c.344C>T      | c.(343-345)tCg>tTg     |
| A | c.5840C>T     | c.(5839-5841)cCg>cTg   |



|   |               |                        |
|---|---------------|------------------------|
| A | c.1352C>T     |                        |
| A | c.2974G>A     | c.(2974-2976)Gag>Aag   |
| A | c.994G>A      | c.(994-996)Gag>Aag     |
| A | c.547G>A      | c.(547-549)Gaa>Aaa     |
| A | c.42069C>T    | c.(42067-42069)atC>atT |
| A |               |                        |
| T |               |                        |
| T |               |                        |
| C | c.2664A>G     | c.(2662-2664)gcA>gcG   |
| C | c.536_splice  | c.e4+1                 |
| C | c.882T>G      | c.(880-882)aaT>aaG     |
| T |               |                        |
| A | c.8942G>A     | c.(8941-8943)aGg>aAg   |
| A |               |                        |
| T | c.5864C>T     | c.(5863-5865)aCc>aTc   |
| A | c.200C>T      | c.(199-201)tCc>tTc     |
| A |               |                        |
| A | c.2492G>A     | c.(2491-2493)cGa>cAa   |
| A |               |                        |
| A | c.4237C>T     | c.(4237-4239)Ccc>Tcc   |
| A | c.134G>A      | c.(133-135)cGa>cAa     |
| A | c.1268_splice | c.e7+1                 |
| A | c.2906C>T     | c.(2905-2907)tCc>tTc   |
| A | c.2230C>T     | c.(2230-2232)Ccc>Tcc   |
| T | c.524G>A      | c.(523-525)aGg>aAg     |
| T |               |                        |
| T | c.2916G>A     | c.(2914-2916)acG>acA   |
| A | c.190C>T      | c.(190-192)Cac>Tac     |
| T | c.3905G>A     | c.(3904-3906)cGa>cAa   |
| C |               |                        |
| T | c.1031C>T     | c.(1030-1032)tCg>tTg   |
| T | c.1717C>T     | c.(1717-1719)Cga>Tga   |
| T |               |                        |
| A |               |                        |
| A | c.315G>A      | c.(313-315)ggG>ggA     |
| T | c.1195G>A     | c.(1195-1197)Gcg>Acg   |
| A | c.9104C>T     | c.(9103-9105)tCt>tTt   |
| A | c.1093G>A     | c.(1093-1095)Gaa>Aaa   |
| T | c.420C>T      | c.(418-420)aaC>aaT     |
| A | c.62C>A       | c.(61-63)aCa>aAa       |
| T |               |                        |
| C | c.323A>G      | c.(322-324)gAa>gGa     |
| T | c.1228_splice | c.e7+1                 |

|   |               |                      |
|---|---------------|----------------------|
| T | c.218C>T      | c.(217-219)tCc>tTc   |
| A | c.495C>T      | c.(493-495)ttC>ttT   |
| T |               |                      |
| T | c.1511G>A     | c.(1510-1512)gGa>gAa |
| A | c.558G>A      | c.(556-558)cgG>cgA   |
| G | c.1037T>G     | c.(1036-1038)gTg>gGg |
| T | c.61_splice   | c.e1+1               |
| C |               |                      |
| C | c.253G>C      | c.(253-255)Gga>Cga   |
| A |               |                      |
| T | c.769C>T      | c.(769-771)Cca>Tca   |
| A | c.678C>T      | c.(676-678)tcC>tcT   |
| T | c.2069C>T     | c.(2068-2070)tCc>tTc |
| T | c.4602C>T     | c.(4600-4602)tcC>tcT |
| A |               |                      |
| T | c.1391G>A     | c.(1390-1392)tGg>tAg |
| T | c.144G>A      | c.(142-144)aaG>aaA   |
| T |               |                      |
| T | c.1417C>T     | c.(1417-1419)Caa>Taa |
| T | c.471G>A      | c.(469-471)aaG>aaA   |
| G | c.430A>G      | c.(430-432)Aca>Gca   |
| A | c.2355G>A     | c.(2353-2355)cgG>cgA |
| T | c.4992G>A     | c.(4990-4992)cgG>cgA |
| A | c.453C>T      | c.(451-453)ttC>ttT   |
| A | c.2519C>T     | c.(2518-2520)gCc>gTc |
| A | c.2889C>T     | c.(2887-2889)ctC>ctT |
| T | c.1070G>A     | c.(1069-1071)cGa>cAa |
| A |               |                      |
| T | c.1731G>A     | c.(1729-1731)tgG>tgA |
| A | c.594C>T      | c.(592-594)acC>acT   |
| A | c.925G>A      | c.(925-927)Gtg>Atg   |
| A | c.3591C>T     | c.(3589-3591)tcC>tcT |
| A | c.310C>T      | c.(310-312)Ccc>Tcc   |
| G | c.749T>G      | c.(748-750)cTc>cGc   |
| T | c.578C>T      | c.(577-579)cCa>cTa   |
| T |               |                      |
| A | c.1954G>A     | c.(1954-1956)Gat>Aat |
| T | c.294C>A      | c.(292-294)atC>atA   |
| A | c.1480_splice | c.e17-1              |
| T | c.1113C>T     | c.(1111-1113)agC>agT |
| A |               |                      |
| A | c.644C>T      | c.(643-645)gCc>gTc   |
| A | c.911G>A      | c.(910-912)gGa>gAa   |

|   |               |                      |
|---|---------------|----------------------|
| A |               |                      |
| T |               |                      |
| T | c.982C>T      | c.(982-984)Cca>Tca   |
| A | c.1979C>T     | c.(1978-1980)tCt>tTt |
| A |               |                      |
| T | c.3678C>T     | c.(3676-3678)ttC>ttT |
| A | c.1972C>T     | c.(1972-1974)Cgt>Tgt |
| T | c.2622G>A     | c.(2620-2622)tgG>tgA |
| T | c.1196C>T     | c.(1195-1197)cCt>cTt |
| T | c.192T>A      | c.(190-192)tgT>tgA   |
| T | c.3539G>T     | c.(3538-3540)cGg>cTg |
| A | c.363C>T      | c.(361-363)ctC>ctT   |
| A | c.555C>T      | c.(553-555)atC>atT   |
| A |               |                      |
| A | c.1093C>T     | c.(1093-1095)Ctt>Ttt |
| G | c.1905A>G     |                      |
| T | c.4310G>A     | c.(4309-4311)gGg>gAg |
| T | c.852C>T      | c.(850-852)ccC>ccT   |
| C |               |                      |
| T | c.130G>A      | c.(130-132)Gga>Aga   |
| A |               |                      |
| T | c.1008C>T     | c.(1006-1008)gcC>gcT |
| A | c.188G>A      | c.(187-189)gGa>gAa   |
| A |               |                      |
| T |               |                      |
| T | c.309G>A      | c.(307-309)tgG>tgA   |
| T | c.1689G>A     | c.(1687-1689)acG>acA |
| A |               |                      |
| T | c.160C>T      | c.(160-162)Cct>Tct   |
| G | c.2800_splice | c.e19-2              |
| T | c.417G>A      | c.(415-417)agG>agA   |
| A | c.1814C>T     | c.(1813-1815)tCc>tTc |
| A | c.2776G>A     | c.(2776-2778)Ggg>Agg |
| T | c.136C>T      | c.(136-138)Cct>Tct   |
| A | c.1152G>A     | c.(1150-1152)aaG>aaA |
| A | c.3208G>A     | c.(3208-3210)Gat>Aat |
| T | c.1318C>T     | c.(1318-1320)Cga>Tga |
| A | c.454C>T      | c.(454-456)Ctt>Ttt   |
| A |               |                      |
| A | c.287C>T      | c.(286-288)gCc>gTc   |
| A | c.1540G>A     | c.(1540-1542)Ggg>Agg |
| T |               |                      |
| A | c.162G>A      | c.(160-162)gaG>gaA   |

|   |              |                        |
|---|--------------|------------------------|
| T | c.575C>T     | c.(574-576)tCt>tTt     |
| A | c.6036C>T    | c.(6034-6036)ttC>ttT   |
| A | c.1741G>A    | c.(1741-1743)Gaa>Aaa   |
| T | c.2743C>T    | c.(2743-2745)Cag>Tag   |
| A | c.754G>A     | c.(754-756)Gat>Aat     |
| T | c.1468C>T    | c.(1468-1470)Cct>Tct   |
| T |              |                        |
| A | c.158_splice | c.e2-1                 |
| A | c.1569C>T    | c.(1567-1569)ttC>ttT   |
| G | c.10278A>G   | c.(10276-10278)ccA>ccG |
| A | c.97455C>T   | c.(97453-97455)ttC>ttT |
| G | c.318T>C     | c.(316-318)ggT>ggC     |
| T | c.4003C>T    | c.(4003-4005)Cca>Tca   |
| T | c.531C>T     | c.(529-531)atC>atT     |
| A | c.65C>T      |                        |
| A | c.4574G>A    | c.(4573-4575)gGa>gAa   |
| T | c.374G>A     | c.(373-375)cGa>cAa     |
| T | c.434C>T     | c.(433-435)cCc>cTc     |
| T | c.1479C>T    | c.(1477-1479)ttC>ttT   |
| T | c.13193C>T   | c.(13192-13194)cCa>cTa |
| A | c.1897C>T    | c.(1897-1899)Cgt>Tgt   |
| A | c.1058C>T    | c.(1057-1059)tCt>tTt   |
| C |              |                        |
| A | c.1399G>A    | c.(1399-1401)Gaa>Aaa   |
| T | c.370C>T     | c.(370-372)Cct>Tct     |
| T | c.5328G>A    | c.(5326-5328)atG>atA   |
| T | c.835C>T     | c.(835-837)Cga>Tga     |
| A |              |                        |
| T | c.2695G>A    | c.(2695-2697)Gga>Aga   |
| T | c.468C>T     | c.(466-468)tcC>tcT     |
| T |              |                        |
| A | c.300G>A     | c.(298-300)atG>atA     |
| T |              |                        |
| A | c.1269G>A    | c.(1267-1269)aaG>aaA   |
| T | c.66C>T      | c.(64-66)tcC>tcT       |
| A | c.1404G>T    | c.(1402-1404)caG>caT   |
| T | c.7776G>A    | c.(7774-7776)cgG>cgA   |
| T | c.1281G>A    | c.(1279-1281)caG>caA   |
| T | c.48C>T      | c.(46-48)tcC>tcT       |
| T |              |                        |
| A | c.1750G>A    | c.(1750-1752)Gag>Aag   |
| T |              |                        |
| A | c.2635G>A    | c.(2635-2637)Gaa>Aaa   |

|   |               |                        |
|---|---------------|------------------------|
| A | c.95C>T       | c.(94-96)tCc>tTc       |
| T | c.1241C>T     | c.(1240-1242)tCg>tTg   |
| A | c.5737C>T     | c.(5737-5739)Cgc>Tgc   |
| T | c.81C>T       | c.(79-81)ttC>ttT       |
| A | c.3057G>A     | c.(3055-3057)gaG>gaA   |
| T | c.3365G>A     | c.(3364-3366)cGg>cAg   |
| T | c.790_splice  | c.e9+1                 |
| T | c.920C>T      | c.(919-921)cCa>cTa     |
| T | c.1217C>T     | c.(1216-1218)tCc>tTc   |
| T | c.34852C>T    |                        |
| T | c.1104G>A     | c.(1102-1104)gtG>gtA   |
| T | c.1455G>A     | c.(1453-1455)gaG>gaA   |
| T | c.70G>T       | c.(70-72)Gca>Tca       |
| A | c.39C>T       | c.(37-39)ttC>ttT       |
| T | c.2037G>A     | c.(2035-2037)gtG>gtA   |
| T | c.399C>T      | c.(397-399)atC>atT     |
| A | c.165C>T      | c.(163-165)agC>agT     |
| T |               |                        |
| T | c.290G>A      | c.(289-291)gGt>gAt     |
| A | c.501G>A      | c.(499-501)tgG>tgA     |
| A |               |                        |
| A | c.15902C>T    | c.(15901-15903)tCa>tTa |
| A | c.1050C>T     | c.(1048-1050)ctC>ctT   |
| A | c.253G>A      | c.(253-255)Gga>Aga     |
| T | c.382G>A      | c.(382-384)Ggt>Agt     |
| A | c.3363G>A     | c.(3361-3363)agG>agA   |
| T | c.2487C>T     | c.(2485-2487)ctC>ctT   |
| G | c.977C>G      | c.(976-978)cCc>cGc     |
| T | c.544C>T      | c.(544-546)Ccc>Tcc     |
| A | c.292G>A      | c.(292-294)Gac>Aac     |
| A | c.1870C>T     | c.(1870-1872)Cgt>Tgt   |
| A | c.551G>A      |                        |
| C | c.229A>G      | c.(229-231)Aag>Gag     |
| A | c.1412_splice | c.e12-1                |
| A | c.1017G>A     | c.(1015-1017)gtG>gtA   |
| T | c.486G>A      | c.(484-486)ggG>ggA     |
| A | c.125C>T      | c.(124-126)tCc>tTc     |
| T | c.2754C>T     | c.(2752-2754)ttC>ttT   |
| A | c.6972G>A     | c.(6970-6972)tgG>tgA   |
| A | c.208C>T      | c.(208-210)Ccc>Tcc     |
| T | c.2109G>A     | c.(2107-2109)tgG>tgA   |
| T | c.981C>T      | c.(979-981)aaC>aaT     |
| T | c.1169G>A     | c.(1168-1170)cGa>cAa   |

|   |                |                      |
|---|----------------|----------------------|
| T | c.99G>A        | c.(97-99)ctG>ctA     |
| A |                |                      |
| T | c.1154G>A      | c.(1153-1155)cGa>cAa |
| T | c.1449C>T      | c.(1447-1449)taC>taT |
| A | c.1031C>T      | c.(1030-1032)tCg>tTg |
| A | c.1093C>T      | c.(1093-1095)Cct>Tct |
| A | c.1544C>T      | c.(1543-1545)tCc>tTc |
| T |                |                      |
| A | c.812C>T       | c.(811-813)cCt>cTt   |
| T | c.30G>A        | c.(28-30)caG>caA     |
| T | c.1488G>A      | c.(1486-1488)gtG>gtA |
| A | c.2426C>A      | c.(2425-2427)tCc>tAc |
| A | c.1225G>A      | c.(1225-1227)Gac>Aac |
| A | c.1870C>T      | c.(1870-1872)Cct>Tct |
| T | c.799G>T       | c.(799-801)Gag>Tag   |
| A | c.15C>T        | c.(13-15)ctC>ctT     |
| T | c.1360C>T      | c.(1360-1362)Ccc>Tcc |
| T | c.1519C>T      | c.(1519-1521)Ctt>Ttt |
| A | c.1347G>A      | c.(1345-1347)gtG>gtA |
| A | c.95G>A        | c.(94-96)gGa>gAa     |
| A | c.861G>A       | c.(859-861)cgG>cgA   |
| A | c.979G>A       | c.(979-981)Gag>Aag   |
| A | c.5083C>T      | c.(5083-5085)Cct>Tct |
| A | c.139_splice   | c.e3+1               |
| C | c.994A>G       | c.(994-996)Atc>Gtc   |
| T | c.801C>T       | c.(799-801)atC>atT   |
| A | c.613C>T       | c.(613-615)Ctt>Ttt   |
| T | c.574C>T       | c.(574-576)Cat>Tat   |
| T | c.1670C>T      | c.(1669-1671)tCt>tTt |
| T |                |                      |
| A | c.1346C>T      | c.(1345-1347)cCt>cTt |
| A | c.789G>A       | c.(787-789)tgG>tgA   |
| T | c.53474_splice | c.e3364-1            |
| A | c.3315G>A      | c.(3313-3315)ctG>ctA |
| T | c.99G>A        | c.(97-99)acG>acA     |
| A | c.974_splice   | c.e4-1               |
| A | c.663G>A       | c.(661-663)ggG>ggA   |
| A | c.564C>T       | c.(562-564)ttC>ttT   |
| T | c.462C>T       | c.(460-462)ttC>ttT   |
| A | c.330C>T       | c.(328-330)atC>atT   |
| T | c.1103C>T      | c.(1102-1104)cCt>cTt |
| A | c.1457G>A      | c.(1456-1458)aGg>aAg |
| T | c.322C>T       | c.(322-324)Cca>Tca   |

|   |              |                        |
|---|--------------|------------------------|
| G | c.1272A>G    | c.(1270-1272)caA>caG   |
| T | c.869C>T     | c.(868-870)cCc>cTc     |
| A | c.1436C>T    | c.(1435-1437)gCc>gTc   |
| T | c.2212C>T    | c.(2212-2214)Cgt>Tgt   |
| A | c.473_splice | c.e3-1                 |
| A |              |                        |
| T | c.472C>T     | c.(472-474)Cca>Tca     |
| A | c.392G>A     | c.(391-393)gGa>gAa     |
| T | c.3071G>A    |                        |
| T | c.2708C>T    | c.(2707-2709)tCc>tTc   |
| T | c.654C>T     | c.(652-654)tcC>tcT     |
| T | c.106C>T     | c.(106-108)Ctc>Ttc     |
| A |              |                        |
| T | c.6357G>A    | c.(6355-6357)acG>acA   |
| A | c.1533C>A    | c.(1531-1533)gtC>gtA   |
| A | c.810G>A     | c.(808-810)agG>agA     |
| T | c.56868G>A   | c.(56866-56868)ctG>ctA |
| T | c.456C>T     | c.(454-456)ttC>ttT     |
| A |              |                        |
| T |              |                        |
| A |              |                        |
| A | c.724C>T     |                        |
| C |              |                        |
| A | c.170C>T     | c.(169-171)cCc>cTc     |
| T |              |                        |
| T |              |                        |
| T | c.7258G>A    | c.(7258-7260)Gaa>Aaa   |
| A | c.1858G>A    | c.(1858-1860)Gac>Aac   |
| A | c.818G>A     | c.(817-819)cGa>cAa     |
| T | c.1414G>A    | c.(1414-1416)Ggt>Agt   |
| T | c.1654G>A    | c.(1654-1656)Gat>Aat   |
| T | c.453G>A     | c.(451-453)tgG>tgA     |
| A |              |                        |
| A | c.661G>A     | c.(661-663)Gaa>Aaa     |
| T | c.1502C>T    | c.(1501-1503)cCa>cTa   |
| T | c.115C>T     | c.(115-117)Cct>Tct     |
| A | c.1150G>A    | c.(1150-1152)Gaa>Aaa   |
| T |              |                        |
| T | c.3707C>T    | c.(3706-3708)cCc>cTc   |
| A | c.524G>A     | c.(523-525)gGa>gAa     |
| A | c.638C>T     | c.(637-639)cCc>cTc     |
| A | c.89C>T      | c.(88-90)cCg>cTg       |
| T | c.1439C>T    | c.(1438-1440)tCc>tTc   |

|   |               |                        |
|---|---------------|------------------------|
| T | c.545C>T      | c.(544-546)tCt>tTt     |
| A | c.61C>T       | c.(61-63)Cct>Tct       |
| T | c.220G>A      | c.(220-222)Gac>Aac     |
| G | c.229A>G      | c.(229-231)Aat>Gat     |
| A |               |                        |
| T |               |                        |
| T | c.444C>T      | c.(442-444)gtC>gtT     |
| T | c.421C>T      | c.(421-423)Ccg>Tcg     |
| A | c.334C>T      | c.(334-336)Cct>Tct     |
| T | c.217G>A      | c.(217-219)Gtg>Atg     |
| A | c.180G>A      | c.(178-180)gaG>gaA     |
| A | c.1569_splice | c.e13-1                |
| T | c.904G>A      | c.(904-906)Gaa>Aaa     |
| T | c.21C>T       | c.(19-21)acC>acT       |
| T | c.768G>A      | c.(766-768)tgG>tgA     |
| T | c.2162G>A     | c.(2161-2163)aGa>aAa   |
| A |               |                        |
| T | c.832C>T      | c.(832-834)Caa>Taa     |
| T | c.489C>T      | c.(487-489)atC>atT     |
| A | c.2287G>A     | c.(2287-2289)Gaa>Aaa   |
| A | c.1271G>A     | c.(1270-1272)gGc>gAc   |
| A | c.578C>T      | c.(577-579)cCc>cTc     |
| A | c.24838C>T    | c.(24838-24840)Cct>Tct |
| G | c.2284A>G     | c.(2284-2286)Aag>Gag   |
| T | c.2026C>T     | c.(2026-2028)Cgt>Tgt   |
| T | c.446C>T      | c.(445-447)cCa>cTa     |
| T | c.422C>T      | c.(421-423)tCc>tTc     |
| A | c.3101G>A     | c.(3100-3102)gGc>gAc   |
| T | c.274G>A      | c.(274-276)Gaa>Aaa     |
| A | c.3204C>T     | c.(3202-3204)gcC>gcT   |
| T | c.911C>T      | c.(910-912)tCg>tTg     |
| T | c.996G>A      | c.(994-996)gtG>gtA     |
| A |               |                        |
| A | c.1344C>T     | c.(1342-1344)gtC>gtT   |
| A | c.7238C>T     | c.(7237-7239)tCt>tTt   |
| T | c.4036G>A     | c.(4036-4038)Gac>Aac   |
| T | c.1582C>T     | c.(1582-1584)Cct>Tct   |
| A |               |                        |
| A | c.1399G>A     | c.(1399-1401)Gaa>Aaa   |
| A |               |                        |
| T | c.3016C>T     | c.(3016-3018)Cag>Tag   |
| T | c.177G>A      | c.(175-177)ggG>ggA     |
| A | c.2514A>T     | c.(2512-2514)gaA>gaT   |



|   |            |                        |
|---|------------|------------------------|
| A |            |                        |
| A | c.222G>T   | c.(220-222)ggG>ggT     |
| A | c.1219G>A  | c.(1219-1221)Gag>Aag   |
| A | c.739C>T   | c.(739-741)Cca>Tca     |
| T |            |                        |
| A | c.2074G>A  | c.(2074-2076)Gga>Aga   |
| A |            |                        |
| T | c.5021G>A  | c.(5020-5022)aGa>aAa   |
| A | c.86G>A    | c.(85-87)aGg>aAg       |
| G | c.150T>G   | c.(148-150)gcT>gcG     |
| T | c.3518G>A  | c.(3517-3519)tGa>tAa   |
| T | c.1007C>T  | c.(1006-1008)tCa>tTa   |
| A | c.286C>T   | c.(286-288)Ctg>Ttg     |
| A | c.16322C>T | c.(16321-16323)tCa>tTa |
| A | c.9501C>T  | c.(9499-9501)ttC>ttT   |
| A | c.2660T>A  | c.(2659-2661)aTt>aAt   |
| G | c.3541A>G  | c.(3541-3543)Agc>Ggc   |
| T | c.531C>T   | c.(529-531)ccC>ccT     |
| A |            |                        |
| A | c.3236G>A  | c.(3235-3237)cGa>cAa   |
| T | c.403G>A   | c.(403-405)Gaa>Aaa     |
| A | c.874G>A   | c.(874-876)Gat>Aat     |
| A | c.838G>A   | c.(838-840)Gaa>Aaa     |
| A |            |                        |
| A | c.2401G>A  | c.(2401-2403)Gac>Aac   |
| G | c.782T>C   | c.(781-783)aTa>aCa     |
| C | c.202G>C   | c.(202-204)Gag>Cag     |
| T | c.660C>T   | c.(658-660)ttC>ttT     |
| A |            |                        |
| A | c.139G>A   | c.(139-141)Gaa>Aaa     |
| T | c.14G>A    | c.(13-15)gGg>gAg       |
| A |            |                        |
| A |            |                        |
| T | c.554G>A   | c.(553-555)gGa>gAa     |
| A | c.4049C>T  | c.(4048-4050)cCc>cTc   |
| T | c.1095C>T  | c.(1093-1095)tcC>tcT   |
| A |            |                        |
| T |            |                        |
| A | c.7643G>A  | c.(7642-7644)cGa>cAa   |
| T | c.2602G>A  | c.(2602-2604)Gaa>Aaa   |
| T | c.504G>T   | c.(502-504)aaG>aaT     |
| T | c.1350G>A  | c.(1348-1350)ttG>ttA   |

|   |               |                        |
|---|---------------|------------------------|
| T | c.438G>A      | c.(436-438)aaG>aaA     |
| A | c.474G>A      | c.(472-474)tgG>tgA     |
| A | c.2652C>T     |                        |
| A | c.1140C>T     | c.(1138-1140)atC>atT   |
| T |               |                        |
| A | c.524G>A      | c.(523-525)cGg>cAg     |
| A | c.1739C>T     | c.(1738-1740)tCc>tTc   |
| A | c.288C>T      | c.(286-288)atC>atT     |
| T |               |                        |
| T | c.945C>T      | c.(943-945)ttC>ttT     |
| A | c.1373C>T     | c.(1372-1374)cCt>cTt   |
| T | c.129G>A      | c.(127-129)tgG>tgA     |
| A | c.13692G>A    | c.(13690-13692)tcG>tcA |
| A | c.3178C>T     | c.(3178-3180)Cgt>Tgt   |
| A | c.2226C>T     | c.(2224-2226)tcC>tcT   |
| G | c.-51_splice  | c.e1-1                 |
| A | c.2931C>T     | c.(2929-2931)ctC>ctT   |
| T | c.157C>T      | c.(157-159)Ctg>Ttg     |
| A | c.5380G>A     | c.(5380-5382)Gag>Aag   |
| A | c.370G>A      | c.(370-372)Gaa>Aaa     |
| A |               |                        |
| A | c.1214C>T     | c.(1213-1215)cCc>cTc   |
| T | c.423C>T      | c.(421-423)atC>atT     |
| A |               |                        |
| A | c.1167G>A     | c.(1165-1167)gaG>gaA   |
| A | c.15C>T       | c.(13-15)ttC>ttT       |
| T |               |                        |
| T | c.1997C>T     | c.(1996-1998)cCc>cTc   |
| T | c.375C>T      | c.(373-375)ccC>ccT     |
| A | c.1017G>A     |                        |
| A | c.1820C>T     | c.(1819-1821)tCc>tTc   |
| T |               |                        |
| T | c.216G>A      | c.(214-216)caG>caA     |
| T | c.1029C>T     | c.(1027-1029)ttC>ttT   |
| T | c.281C>T      | c.(280-282)cCc>cTc     |
| T | c.1125_splice | c.e4+1                 |
| T | c.598C>T      | c.(598-600)Cct>Tct     |
| T | c.18569C>T    | c.(18568-18570)tCc>tTc |
| A |               |                        |
| T | c.975C>T      | c.(973-975)tcC>tcT     |
| G |               |                        |
| T | c.1947G>A     | c.(1945-1947)ggG>ggA   |
| T | c.548G>A      | c.(547-549)cGg>cAg     |

|   |              |                        |
|---|--------------|------------------------|
| A | c.627C>T     | c.(625-627)ttC>ttT     |
| A | c.1675C>T    | c.(1675-1677)Cat>Tat   |
| A | c.3243C>T    | c.(3241-3243)ttC>ttT   |
| T |              |                        |
| A | c.1497G>A    | c.(1495-1497)agG>agA   |
| A |              |                        |
| A | c.262G>A     | c.(262-264)Gaa>Aaa     |
| A | c.946C>T     | c.(946-948)Cca>Tca     |
| T | c.184C>T     | c.(184-186)Cgt>Tgt     |
| T | c.157G>A     | c.(157-159)Gga>Aga     |
| T | c.1177G>A    | c.(1177-1179)Gac>Aac   |
| T | c.1325C>T    | c.(1324-1326)tCa>tTa   |
| A | c.643C>T     | c.(643-645)Ctc>Ttc     |
| A | c.447C>T     | c.(445-447)ttC>ttT     |
| T | c.1086C>T    | c.(1084-1086)ttC>ttT   |
| T | c.871G>A     | c.(871-873)Gat>Aat     |
| A | c.1332C>T    | c.(1330-1332)tcC>tcT   |
| T |              |                        |
| A |              |                        |
| A | c.2395G>A    | c.(2395-2397)Gaa>Aaa   |
| T | c.767G>A     | c.(766-768)gGa>gAa     |
| A | c.3498C>T    | c.(3496-3498)tcC>tcT   |
| T |              |                        |
| A | c.300C>T     | c.(298-300)ctC>ctT     |
| A | c.361C>T     | c.(361-363)Ctt>Ttt     |
| T | c.386C>T     | c.(385-387)tCc>tTc     |
| A |              |                        |
| A | c.432G>A     | c.(430-432)ggG>ggA     |
| T | c.768_splice | c.e3+1                 |
| T | c.1491G>A    | c.(1489-1491)ttG>ttA   |
| T |              |                        |
| A |              |                        |
| A |              |                        |
| T | c.11738C>T   | c.(11737-11739)aCc>aTc |
| T | c.5827C>T    | c.(5827-5829)Cca>Tca   |
| A | c.2041C>T    | c.(2041-2043)Cgc>Tgc   |
| A |              |                        |
| A | c.191C>T     | c.(190-192)cCt>cTt     |
| T |              |                        |
| T | c.805C>T     | c.(805-807)Cta>Tta     |
| A | c.170C>T     | c.(169-171)gCt>gTt     |
| A | c.35G>A      | c.(34-36)gGg>gAg       |
| A | c.1309G>T    | c.(1309-1311)Gag>Tag   |

|   |              |                      |
|---|--------------|----------------------|
| A |              |                      |
| A | c.183G>A     | c.(181-183)aaG>aaA   |
| A | c.345A>T     | c.(343-345)caA>caT   |
| A | c.1446G>A    | c.(1444-1446)ggG>ggA |
| A | c.1553C>T    | c.(1552-1554)cCg>cTg |
| T | c.1629C>T    | c.(1627-1629)ttC>ttT |
| T | c.370G>A     | c.(370-372)Gac>Aac   |
| A |              |                      |
| A |              |                      |
| T | c.1384C>T    | c.(1384-1386)Cgc>Tgc |
| T | c.822G>A     | c.(820-822)caG>caA   |
| A | c.44G>A      | c.(43-45)aGg>aAg     |
| A | c.1870G>A    | c.(1870-1872)Gag>Aag |
| T | c.2046C>T    | c.(2044-2046)ttC>ttT |
| A | c.420G>A     | c.(418-420)gtG>gtA   |
| A | c.3729C>T    | c.(3727-3729)gcC>gcT |
| A | c.1125C>A    | c.(1123-1125)tcC>tcA |
| A | c.187G>A     | c.(187-189)Gga>Aga   |
| T | c.61C>T      | c.(61-63)Cgg>Tgg     |
| T | c.118G>A     | c.(118-120)Gga>Aga   |
| A |              |                      |
| T | c.819C>T     | c.(817-819)atC>atT   |
| A |              |                      |
| A | c.1189C>T    | c.(1189-1191)Cag>Tag |
| A |              |                      |
| T | c.1250G>A    | c.(1249-1251)gGa>gAa |
| T | c.3286C>T    | c.(3286-3288)Cct>Tct |
| T | c.5239G>A    | c.(5239-5241)Ggg>Agg |
| T | c.962C>T     | c.(961-963)cCc>cTc   |
| A | c.957C>A     | c.(955-957)acC>acA   |
| A | c.472C>T     | c.(472-474)Ccg>Tcg   |
| A |              |                      |
| T | c.121G>A     | c.(121-123)Gaa>Aaa   |
| A | c.3714C>T    | c.(3712-3714)caC>caT |
| T | c.3476C>T    | c.(3475-3477)tCc>tTc |
| A |              |                      |
| T | c.160C>T     | c.(160-162)Cgt>Tgt   |
| T | c.546C>T     | c.(544-546)ttC>ttT   |
| T | c.555C>T     | c.(553-555)atC>atT   |
| A | c.1440G>A    | c.(1438-1440)ctG>ctA |
| A | c.991C>T     | c.(991-993)Cca>Tca   |
| T | c.542C>T     | c.(541-543)tCg>tTg   |
| A | c.165_splice | c.e3-1               |

|   |               |                      |
|---|---------------|----------------------|
| A | c.1865_splice | c.e14-1              |
| T | c.3794_splice | c.e15-1              |
| A | c.38G>A       | c.(37-39)tGg>tAg     |
| T | c.2968G>A     | c.(2968-2970)Ggc>Agc |
| A | c.4884_splice | c.e18+1              |
| A | c.931C>T      | c.(931-933)Cct>Tct   |
| A | c.274G>A      | c.(274-276)Gga>Aga   |
| T | c.711G>A      | c.(709-711)gtG>gtA   |
| T | c.3922G>A     | c.(3922-3924)Ggc>Agc |
| T | c.433G>A      | c.(433-435)Gcc>Acc   |
| T |               |                      |
| T |               |                      |
| T | c.434C>T      | c.(433-435)tCt>tTt   |
| T | c.331C>T      | c.(331-333)Cgc>Tgc   |
| A | c.174C>T      | c.(172-174)ccC>ccT   |
| T | c.179C>T      | c.(178-180)cCc>cTc   |
| C | c.713T>C      | c.(712-714)aTg>aCg   |
| T | c.2161C>T     | c.(2161-2163)Ctc>Ttc |
| G | c.487T>G      | c.(487-489)Tta>Gta   |
| A | c.265G>A      | c.(265-267)Gag>Aag   |
| A | c.607G>A      | c.(607-609)Gaa>Aaa   |
| A | c.110C>T      | c.(109-111)cCc>cTc   |
| T | c.2042C>A     | c.(2041-2043)cCg>cAg |
| T | c.2679G>A     | c.(2677-2679)gaG>gaA |
| A | c.1583C>T     | c.(1582-1584)cCt>cTt |
| T | c.355G>A      | c.(355-357)Gaa>Aaa   |
| A | c.2049G>T     | c.(2047-2049)ctG>ctT |
| A | c.975C>T      | c.(973-975)gtC>gtT   |
| A | c.3190G>A     | c.(3190-3192)Gga>Aga |
| A | c.2752C>T     | c.(2752-2754)Cct>Tct |
| A | c.286G>A      | c.(286-288)Gga>Aga   |
| A | c.3523C>T     |                      |
| A | c.1099T>A     | c.(1099-1101)Ttg>Atg |
| A | c.3013C>T     | c.(3013-3015)Ctt>Ttt |
| T |               |                      |
| A | c.1116C>T     | c.(1114-1116)atC>atT |
| T | c.521G>A      | c.(520-522)gGa>gAa   |
| A | c.248C>T      | c.(247-249)tCc>tTc   |
| A | c.1790C>T     | c.(1789-1791)tCc>tTc |
| A | c.1052C>T     | c.(1051-1053)cCc>cTc |
| A | c.1376C>T     | c.(1375-1377)tCc>tTc |
| A | c.358G>A      | c.(358-360)Gag>Aag   |
| A | c.1794C>T     | c.(1792-1794)atC>atT |

|   |              |                      |
|---|--------------|----------------------|
| T |              |                      |
| T | c.550G>A     | c.(550-552)Gaa>Aaa   |
| T | c.874C>T     | c.(874-876)Cct>Tct   |
| A | c.1074G>A    | c.(1072-1074)aaG>aaA |
| A |              |                      |
| A | c.1196G>A    | c.(1195-1197)tGg>tAg |
| T | c.245C>T     | c.(244-246)tCc>tTc   |
| A | c.9564C>T    | c.(9562-9564)ttC>ttT |
| T | c.1293C>T    | c.(1291-1293)acC>acT |
| C |              |                      |
| A |              |                      |
| A |              |                      |
| T | c.5815G>A    | c.(5815-5817)Gag>Aag |
| T | c.709C>T     | c.(709-711)Cat>Tat   |
| A | c.603C>T     | c.(601-603)atC>atT   |
| G | c.1621A>C    | c.(1621-1623)Aac>Cac |
| A | c.1404C>T    | c.(1402-1404)gaC>gaT |
| A | c.793G>A     | c.(793-795)Gga>Aga   |
| T | c.3815G>A    | c.(3814-3816)gGg>gAg |
| A | c.2597C>T    | c.(2596-2598)tCg>tTg |
| T | c.156C>T     | c.(154-156)ccC>ccT   |
| T | c.799C>T     | c.(799-801)Ctt>Ttt   |
| A |              |                      |
| T |              |                      |
| T | c.2108G>A    | c.(2107-2109)tGg>tAg |
| A | c.423G>A     | c.(421-423)cgG>cgA   |
| T | c.1222G>A    | c.(1222-1224)Gac>Aac |
| C |              |                      |
| T | c.2946C>T    | c.(2944-2946)atC>atT |
| T |              |                      |
| T | c.686G>A     | c.(685-687)aGa>aAa   |
| T | c.1305C>T    | c.(1303-1305)ttC>ttT |
| A | c.843C>T     | c.(841-843)ccC>ccT   |
| T | c.720G>A     | c.(718-720)agG>agA   |
| A | c.858C>T     | c.(856-858)ttC>ttT   |
| A | c.210_splice | c.e2+1               |
| A |              |                      |
| A | c.585C>T     | c.(583-585)atC>atT   |
| A | c.1707C>T    | c.(1705-1707)ttC>ttT |
| T | c.2803C>T    | c.(2803-2805)Cga>Tga |
| A | c.632C>T     | c.(631-633)cCa>cTa   |
| A |              |                      |
| A |              |                      |

|   |               |                        |
|---|---------------|------------------------|
| A | c.1730G>A     | c.(1729-1731)gGa>gAa   |
| T | c.715C>T      | c.(715-717)Cca>Tca     |
| T | c.1243C>T     | c.(1243-1245)Cca>Tca   |
| A | c.260C>T      | c.(259-261)cCc>cTc     |
| T | c.2323C>T     | c.(2323-2325)Cat>Tat   |
| T | c.76898G>A    | c.(76897-76899)tGg>tAg |
| A | c.126G>A      | c.(124-126)gtG>gtA     |
| A | c.1496C>T     | c.(1495-1497)tCt>tTt   |
| A | c.311C>T      | c.(310-312)tCc>tTc     |
| A | c.2944C>T     | c.(2944-2946)Cga>Tga   |
| T | c.340C>T      | c.(340-342)Ctg>Ttg     |
| A | c.5211C>T     | c.(5209-5211)tcC>tcT   |
| A | c.4320G>A     | c.(4318-4320)tgG>tgA   |
| A | c.1427_splice | c.e7-1                 |
| A | c.522C>T      | c.(520-522)aaC>aaT     |
| A |               |                        |
| A | c.2561G>A     | c.(2560-2562)aGg>aAg   |
| A |               |                        |
| T | c.1012C>T     | c.(1012-1014)Cta>Tta   |
| T |               |                        |
| T | c.1727C>T     | c.(1726-1728)cCc>cTc   |
| T | c.199G>A      | c.(199-201)Gag>Aag     |
| T | c.2202C>T     | c.(2200-2202)atC>atT   |
| A |               |                        |
| C | c.31T>G       | c.(31-33)Tgc>Ggc       |
| A | c.3167C>T     | c.(3166-3168)tCc>tTc   |
| A | c.1037C>T     | c.(1036-1038)gCt>gTt   |
| T | c.7184C>T     | c.(7183-7185)cCt>cTt   |
| T | c.816C>T      | c.(814-816)atC>atT     |
| T | c.49C>T       | c.(49-51)Ccc>Tcc       |
| T | c.269C>T      | c.(268-270)cCc>cTc     |
| T | c.1116C>T     | c.(1114-1116)atC>atT   |
| A |               |                        |
| T | c.75C>T       | c.(73-75)tcC>tcT       |
| G | c.3561T>G     | c.(3559-3561)tcT>tcG   |
| T |               |                        |
| A | c.86G>T       | c.(85-87)tGc>tTc       |
| A | c.204C>T      | c.(202-204)tcC>tcT     |
| T | c.-33_splice  | c.e1-1                 |
| T | c.5191C>T     |                        |
| T |               |                        |
| C | c.356A>G      | c.(355-357)aAg>aGg     |
| A | c.563_splice  | c.e5+1                 |

|   |               |                        |
|---|---------------|------------------------|
| A | c.3260G>A     | c.(3259-3261)gGg>gAg   |
| T | c.551C>T      | c.(550-552)cCc>cTc     |
| T | c.228G>A      | c.(226-228)aaG>aaA     |
| T | c.273C>T      | c.(271-273)atC>atT     |
| A | c.626C>T      | c.(625-627)cCg>cTg     |
| T | c.873C>T      | c.(871-873)ttC>ttT     |
| T | c.531G>A      | c.(529-531)agG>agA     |
| A |               |                        |
| T | c.505C>T      | c.(505-507)Cgt>Tgt     |
| T |               |                        |
| A | c.999G>A      | c.(997-999)gaG>gaA     |
| T | c.1109C>A     | c.(1108-1110)tCt>tAt   |
| T | c.168G>A      | c.(166-168)acG>acA     |
| A | c.1242G>A     | c.(1240-1242)ctG>ctA   |
| A | c.698C>T      | c.(697-699)tCc>tTc     |
| A | c.546C>T      | c.(544-546)ttC>ttT     |
| T | c.3372C>T     | c.(3370-3372)tcC>tcT   |
| T | c.3653G>A     | c.(3652-3654)aGa>aAa   |
| A | c.9145G>A     | c.(9145-9147)Gag>Aag   |
| A |               |                        |
| A | c.21277C>T    | c.(21277-21279)Ccc>Tcc |
| T |               |                        |
| A | c.316G>A      | c.(316-318)Gat>Aat     |
| T | c.426G>A      | c.(424-426)ggG>ggA     |
| T | c.5250G>A     | c.(5248-5250)agG>agA   |
| A |               |                        |
| T | c.2055_splice | c.e22-1                |
| A | c.289C>T      | c.(289-291)Cag>Tag     |
| T | c.590G>T      | c.(589-591)gGa>gTa     |
| A | c.1342C>T     | c.(1342-1344)Ccg>Tcg   |
| T | c.278G>A      | c.(277-279)gGa>gAa     |
| T | c.951G>T      | c.(949-951)ctG>ctT     |
| A | c.1923C>T     | c.(1921-1923)ttC>ttT   |
| G |               |                        |
| A | c.1051C>T     | c.(1051-1053)Ccc>Tcc   |
| T | c.2303C>T     | c.(2302-2304)tCc>tTc   |
| T | c.16C>T       | c.(16-18)Cgc>Tgc       |
| A | c.3028C>T     | c.(3028-3030)Cgc>Tgc   |
| A |               |                        |
| T | c.94C>T       | c.(94-96)Cca>Tca       |
| C | c.3627A>G     |                        |
| T | c.3806G>A     | c.(3805-3807)cGc>cAc   |
| T | c.114G>A      | c.(112-114)aaG>aaA     |



|   |               |                        |
|---|---------------|------------------------|
| T |               |                        |
| T | c.535T>A      | c.(535-537)Tac>Aac     |
| T | c.13570G>A    | c.(13570-13572)Gat>Aat |
| A | c.606C>T      | c.(604-606)tcC>tcT     |
| T | c.507C>T      | c.(505-507)tcC>tcT     |
| T |               |                        |
| T | c.3745G>A     | c.(3745-3747)Gaa>Aaa   |
| A | c.457C>T      | c.(457-459)Cat>Tat     |
| A | c.1181G>A     | c.(1180-1182)gGg>gAg   |
| A | c.582G>A      | c.(580-582)aaG>aaA     |
| A | c.1717C>T     | c.(1717-1719)Cga>Tga   |
| T | c.31332G>A    | c.(31330-31332)gaG>gaA |
| T | c.197C>T      | c.(196-198)tCg>tTg     |
| A | c.11700C>T    | c.(11698-11700)gcC>gcT |
| T |               |                        |
| A | c.11300C>T    | c.(11299-11301)tCc>tTc |
| A | c.929G>T      | c.(928-930)aGg>aTg     |
| T | c.282G>A      | c.(280-282)acG>acA     |
| T | c.87C>T       | c.(85-87)taC>taT       |
| A | c.410C>T      | c.(409-411)tCc>tTc     |
| T | c.988G>A      | c.(988-990)Gat>Aat     |
| T | c.1106C>T     | c.(1105-1107)cCc>cTc   |
| A | c.843G>A      | c.(841-843)tcG>tcA     |
| A | c.3481C>T     | c.(3481-3483)Ctt>Ttt   |
| A | c.535C>T      | c.(535-537)Cca>Tca     |
| T |               |                        |
| A | c.1378C>T     | c.(1378-1380)Ccg>Tcg   |
| A |               |                        |
| T | c.3784C>T     | c.(3784-3786)Ctt>Ttt   |
| A | c.2054C>T     | c.(2053-2055)cCa>cTa   |
| T | c.1672G>A     | c.(1672-1674)Gaa>Aaa   |
| T | c.814C>T      | c.(814-816)Cct>Tct     |
| A | c.871_splice  | c.e11-1                |
| T | c.544C>T      | c.(544-546)Cag>Tag     |
| T | c.384G>A      | c.(382-384)aaG>aaA     |
| T | c.2924C>T     | c.(2923-2925)gCc>gTc   |
| G |               |                        |
| T | c.574C>T      |                        |
| T | c.915G>A      | c.(913-915)gaG>gaA     |
| A | c.7546_splice | c.e11+1                |
| A |               |                        |
| A | c.1803G>A     | c.(1801-1803)gtG>gtA   |
| T | c.3719C>T     | c.(3718-3720)cCa>cTa   |

|   |              |                      |
|---|--------------|----------------------|
| A | c.373_splice | c.e8-1               |
| A | c.620C>T     | c.(619-621)cCc>cTc   |
| T | c.756C>T     | c.(754-756)ttC>ttT   |
| T | c.2395C>T    | c.(2395-2397)Ctg>Ttg |
| T | c.2016C>T    | c.(2014-2016)taC>taT |
| T | c.415G>A     | c.(415-417)Gaa>Aaa   |
| T |              |                      |
| A | c.1728G>A    | c.(1726-1728)agG>agA |
| T | c.1969A>T    | c.(1969-1971)Aac>Tac |
| A |              |                      |
| T | c.322G>T     | c.(322-324)Gag>Tag   |
| A | c.676G>T     | c.(676-678)Gag>Tag   |
| T | c.1106G>T    | c.(1105-1107)aGg>aTg |
| A |              |                      |
| T |              |                      |
| T | c.150C>T     | c.(148-150)gtC>gtT   |
| A | c.91G>A      | c.(91-93)Gaa>Aaa     |
| T | c.1703C>T    | c.(1702-1704)tCt>tTt |
| A | c.895C>T     | c.(895-897)Ccc>Tcc   |
| T | c.1441G>A    | c.(1441-1443)Gaa>Aaa |
| T | c.1823G>A    | c.(1822-1824)gGa>gAa |
| A | c.1255C>T    | c.(1255-1257)Ctt>Ttt |
| T | c.1373C>T    | c.(1372-1374)tCa>tTa |
| A | c.2823C>T    | c.(2821-2823)ttC>ttT |
| C |              |                      |
| T | c.223C>A     | c.(223-225)Ctg>Atg   |
| A | c.3056G>A    | c.(3055-3057)gGa>gAa |
| T |              |                      |
| A | c.171G>T     | c.(169-171)gaG>gaT   |
| T | c.1231A>T    | c.(1231-1233)Aga>Tga |
| A | c.3403C>T    | c.(3403-3405)Cgg>Tgg |
| A | c.1028C>T    | c.(1027-1029)cCa>cTa |
| C | c.1983A>G    | c.(1981-1983)aaA>aaG |
| T | c.1855C>T    | c.(1855-1857)Cag>Tag |
| T |              |                      |
| A | c.2262G>A    | c.(2260-2262)cgG>cgA |
| T | c.1381C>T    | c.(1381-1383)Cct>Tct |
| A | c.1115G>A    | c.(1114-1116)gGa>gAa |
| T | c.352G>A     | c.(352-354)Ggg>Agg   |
| A |              |                      |
| T | c.1802C>T    | c.(1801-1803)cCa>cTa |
| A | c.893G>A     | c.(892-894)cGg>cAg   |

|   |            |                        |
|---|------------|------------------------|
| A | c.220C>T   | c.(220-222)Cct>Tct     |
| T |            |                        |
| A | c.1953G>A  | c.(1951-1953)acG>acA   |
| A |            |                        |
| T | c.2496G>A  | c.(2494-2496)ggG>ggA   |
| A | c.393C>T   | c.(391-393)tcC>tcT     |
| T | c.230G>A   | c.(229-231)gGg>gAg     |
| T | c.1025C>T  | c.(1024-1026)cCc>cTc   |
| A | c.1821G>A  | c.(1819-1821)ggG>ggA   |
| T |            |                        |
| T | c.694C>T   | c.(694-696)Cct>Tct     |
| A |            |                        |
| T | c.615G>A   | c.(613-615)caG>caA     |
| T | c.732C>T   | c.(730-732)acC>acT     |
| A | c.2471C>T  | c.(2470-2472)cCc>cTc   |
| T | c.1430C>T  | c.(1429-1431)tCt>tTt   |
| T | c.1241C>T  | c.(1240-1242)tCg>tTg   |
| A | c.930C>T   | c.(928-930)gcC>gcT     |
| T | c.385G>A   | c.(385-387)Gag>Aag     |
| T | c.10884C>T | c.(10882-10884)atC>atT |
| T | c.578C>T   | c.(577-579)tCt>tTt     |
| A | c.1729G>A  | c.(1729-1731)Gtg>Atg   |
| A | c.389T>A   | c.(388-390)aTt>aAt     |
| A | c.17G>A    | c.(16-18)gGg>gAg       |
| T | c.1153C>T  | c.(1153-1155)Cta>Tta   |
| T | c.2614C>T  | c.(2614-2616)Cgg>Tgg   |
| T |            |                        |
| T | c.352C>T   | c.(352-354)Cag>Tag     |
| T |            |                        |
| A | c.789C>T   | c.(787-789)ttC>ttT     |
| A |            |                        |
| T | c.683C>T   | c.(682-684)cCg>cTg     |
| T | c.615G>A   | c.(613-615)gtG>gtA     |
| A | c.240C>T   | c.(238-240)ttC>ttT     |
| A |            |                        |
| A | c.278G>A   | c.(277-279)gGg>gAg     |
| G | c.5208A>G  | c.(5206-5208)ggA>ggG   |
| A |            |                        |
| A | c.220G>A   | c.(220-222)Gtc>Atc     |
| T | c.930C>T   | c.(928-930)tcC>tcT     |
| A | c.2318T>A  | c.(2317-2319)tTt>tAt   |
| C | c.3949T>C  | c.(3949-3951)Tta>Cta   |
| T |            |                        |

|   |           |                      |
|---|-----------|----------------------|
| T |           |                      |
| A | c.477C>T  | c.(475-477)gtC>gtT   |
| T | c.211C>T  | c.(211-213)Ccg>Tcg   |
| A | c.3236C>T | c.(3235-3237)tCc>tTc |
| T | c.1537C>T | c.(1537-1539)Cga>Tga |
| A |           |                      |
| A | c.21G>A   | c.(19-21)tcG>tcA     |
| T |           |                      |
| T | c.1599C>T | c.(1597-1599)tcC>tcT |
| T | c.1323C>T | c.(1321-1323)ctC>ctT |
| T | c.357C>T  | c.(355-357)ttC>ttT   |
| T | c.1311C>T | c.(1309-1311)ccC>ccT |
| A | c.2317G>A | c.(2317-2319)Gat>Aat |
| T | c.668C>T  | c.(667-669)cCt>cTt   |
| T |           |                      |
| T |           |                      |
| T | c.643G>A  | c.(643-645)Gat>Aat   |
| G | c.540A>G  | c.(538-540)acA>acG   |
| T |           |                      |
| A |           |                      |
| A | c.1780C>T | c.(1780-1782)Cgt>Tgt |
| T | c.1916G>A | c.(1915-1917)gGa>gAa |
| A | c.324C>T  | c.(322-324)tcC>tcT   |
| C |           |                      |
| T | c.1489C>T | c.(1489-1491)Ccc>Tcc |
| T |           |                      |
| A |           |                      |
| T | c.1896G>A |                      |
| A | c.898C>T  | c.(898-900)Ctt>Ttt   |
| T | c.1152C>T | c.(1150-1152)ccC>ccT |
| T |           |                      |
| A | c.2141G>A | c.(2140-2142)gGg>gAg |
| A | c.762G>A  | c.(760-762)atG>atA   |
| T |           |                      |
| A |           |                      |
| T | c.469C>A  | c.(469-471)Cag>Aag   |
| T | c.2957G>A | c.(2956-2958)gGa>gAa |
| C | c.694T>G  | c.(694-696)Tcc>Gcc   |
| A | c.1840G>A | c.(1840-1842)Gag>Aag |
| T | c.1302G>A | c.(1300-1302)gtG>gtA |
| T |           |                      |
| T |           |                      |
| G | c.440A>G  | c.(439-441)tAt>tGt   |

|   |               |                      |
|---|---------------|----------------------|
| C | c.131A>C      | c.(130-132)aAa>aCa   |
| A | c.328G>A      | c.(328-330)Gag>Aag   |
| T | c.9363C>T     | c.(9361-9363)atC>atT |
| A | c.2119_splice | c.e9+1               |
| T | c.34G>A       | c.(34-36)Gac>Aac     |
| T | c.439G>A      | c.(439-441)Gga>Aga   |
| T | c.560G>A      | c.(559-561)gGc>gAc   |
| A | c.613G>A      | c.(613-615)Ggg>Agg   |
| A | c.87G>A       | c.(85-87)agG>agA     |
| A | c.364G>A      | c.(364-366)Gat>Aat   |
| T | c.1490C>T     | c.(1489-1491)cCc>cTc |
| T | c.2040G>A     | c.(2038-2040)atG>atA |
| T |               |                      |
| A | c.587T>A      | c.(586-588)aTg>aAg   |
| A | c.1596C>T     | c.(1594-1596)gtC>gtT |
| T | c.1325C>T     | c.(1324-1326)tCt>tTt |
| T | c.1113C>T     | c.(1111-1113)gcC>gcT |
| T | c.412_splice  | c.e3-1               |
| T | c.37C>T       | c.(37-39)Ccc>Tcc     |
| T | c.1126C>T     | c.(1126-1128)Cat>Tat |
| T | c.117G>A      | c.(115-117)cgG>cgA   |
| A | c.1511G>A     | c.(1510-1512)tGg>tAg |
| T | c.6179C>T     | c.(6178-6180)gCc>gTc |
| A | c.238C>A      | c.(238-240)Cct>Act   |
| T | c.1583C>T     | c.(1582-1584)cCa>cTa |
| T | c.1507G>A     | c.(1507-1509)Gaa>Aaa |
| T | c.289G>A      | c.(289-291)Ggt>Agt   |
| T | c.573C>T      | c.(571-573)tgC>tgT   |
| G |               |                      |
| A | c.2074C>T     | c.(2074-2076)Cga>Tga |
| T | c.1003G>A     | c.(1003-1005)Gac>Aac |
| T | c.208_splice  | c.e3-1               |
| A | c.956G>A      | c.(955-957)cGg>cAg   |
| T | c.1399G>A     | c.(1399-1401)Gat>Aat |
| A | c.1540C>T     | c.(1540-1542)Cct>Tct |
| A | c.2058C>T     | c.(2056-2058)ctC>ctT |
| A |               |                      |
| A | c.620G>A      | c.(619-621)gGa>gAa   |
| T | c.667G>A      | c.(667-669)Gga>Aga   |
| T |               |                      |
| A | c.937T>A      | c.(937-939)Tct>Act   |
| T | c.299C>T      | c.(298-300)cCc>cTc   |
| T | c.548C>T      | c.(547-549)tCc>tTc   |

|   |             |                      |
|---|-------------|----------------------|
| A |             |                      |
| A | c.190G>A    | c.(190-192)Gac>Aac   |
| A |             |                      |
| T | c.402C>T    | c.(400-402)acC>acT   |
| C | c.215T>C    | c.(214-216)cTg>cCg   |
| A | c.4035G>A   | c.(4033-4035)atG>atA |
| T | c.552C>T    | c.(550-552)ccC>ccT   |
| A |             |                      |
| G | c.1551A>G   | c.(1549-1551)gaA>gaG |
| A | c.4536G>A   | c.(4534-4536)ctG>ctA |
| A | c.1975C>T   | c.(1975-1977)Cca>Tca |
| T | c.1300C>T   | c.(1300-1302)Cag>Tag |
| A | c.3504G>A   | c.(3502-3504)gaG>gaA |
| T | c.364C>T    | c.(364-366)Cag>Tag   |
| T |             |                      |
| T | c.756C>T    | c.(754-756)atC>atT   |
| T | c.1418C>T   | c.(1417-1419)cCg>cTg |
| A | c.2138G>A   | c.(2137-2139)gGg>gAg |
| A | c.2289C>T   | c.(2287-2289)ttC>ttT |
| A | c.909C>T    | c.(907-909)gcC>gcT   |
| T | c.261G>A    | c.(259-261)ggG>ggA   |
| T | c.1870C>T   | c.(1870-1872)Ctg>Ttg |
| T | c.2488C>T   | c.(2488-2490)Cca>Tca |
| T |             |                      |
| A | c.515C>T    | c.(514-516)cCc>cTc   |
| A | c.529T>A    |                      |
| T | c.47C>T     | c.(46-48)cCc>cTc     |
| T | c.424C>T    | c.(424-426)Cct>Tct   |
| A | c.431C>T    |                      |
| T | c.351C>T    | c.(349-351)ttC>ttT   |
| G |             |                      |
| A | c.794C>T    | c.(793-795)cCc>cTc   |
| A | c.709C>T    | c.(709-711)Ccc>Tcc   |
| A | c.1310G>A   | c.(1309-1311)gGa>gAa |
| A | c.1365G>A   | c.(1363-1365)aaG>aaA |
| T | c.3234C>T   | c.(3232-3234)atC>atT |
| C | c.201C>G    | c.(199-201)gcC>gcG   |
| T | c.1406G>A   | c.(1405-1407)gGa>gAa |
| G | c.563T>C    | c.(562-564)cTa>cCa   |
| A | c.49_splice | c.e2-1               |
| T | c.3777C>T   | c.(3775-3777)atC>atT |
| T | c.1243C>T   | c.(1243-1245)Ctt>Ttt |
| A | c.651C>T    | c.(649-651)ccC>ccT   |

|   |            |                        |
|---|------------|------------------------|
| A | c.1546C>T  | c.(1546-1548)Cct>Tct   |
| T | c.103C>T   | c.(103-105)Caa>Taa     |
| T | c.616G>A   | c.(616-618)Gat>Aat     |
| C |            |                        |
| A | c.2754G>A  | c.(2752-2754)gtG>gtA   |
| A | c.3222G>A  | c.(3220-3222)ggG>ggA   |
| A |            |                        |
| A | c.2768C>T  |                        |
| T | c.133C>T   | c.(133-135)Ccc>Tcc     |
| A | c.3738G>A  | c.(3736-3738)aaG>aaA   |
| T |            |                        |
| T | c.550C>T   | c.(550-552)Cat>Tat     |
| T | c.45G>A    | c.(43-45)ctG>ctA       |
| A | c.256C>T   | c.(256-258)Ctg>Ttg     |
| A |            |                        |
| T | c.4285G>A  | c.(4285-4287)Gga>Aga   |
| A | c.23G>A    | c.(22-24)cGa>cAa       |
| A | c.1896C>T  | c.(1894-1896)atC>atT   |
| T | c.919C>T   | c.(919-921)Cta>Tta     |
| A | c.1396C>T  | c.(1396-1398)Cca>Tca   |
| A | c.1780C>T  | c.(1780-1782)Ctg>Ttg   |
| A |            |                        |
| A | c.389C>T   | c.(388-390)cCc>cTc     |
| A | c.500C>T   | c.(499-501)cCc>cTc     |
| A | c.353C>T   | c.(352-354)tCc>tTc     |
| T |            |                        |
| G | c.3043T>G  | c.(3043-3045)Tct>Gct   |
| T | c.1749C>T  | c.(1747-1749)atC>atT   |
| A |            |                        |
| C | c.13271A>C | c.(13270-13272)aAg>aCg |
| T |            |                        |
| T | c.2273C>T  | c.(2272-2274)tCt>tTt   |
| A | c.1172C>T  | c.(1171-1173)tCc>tTc   |
| C | c.2023C>G  | c.(2023-2025)Ccc>Gcc   |
| C | c.305T>G   | c.(304-306)cTc>cGc     |
| T |            |                        |
| A | c.407G>A   | c.(406-408)gGa>gAa     |
| A | c.2437C>T  | c.(2437-2439)Cag>Tag   |
| A | c.3124G>A  | c.(3124-3126)Ggc>Agc   |
| T | c.243G>A   | c.(241-243)acG>acA     |
| T | c.1625C>T  | c.(1624-1626)tCc>tTc   |
| A | c.816G>A   | c.(814-816)aaG>aaA     |
| T | c.765C>T   | c.(763-765)gcC>gcT     |

|   |               |                        |
|---|---------------|------------------------|
| T | c.387G>A      | c.(385-387)ctG>ctA     |
| T |               |                        |
| A |               |                        |
| A | c.258C>T      | c.(256-258)gtC>gtT     |
| A |               |                        |
| T |               |                        |
| A | c.6726G>A     | c.(6724-6726)ggG>ggA   |
| C | c.100C>G      | c.(100-102)Cca>Gca     |
| T | c.1239_splice | c.e13-1                |
| A | c.207C>T      | c.(205-207)atC>atT     |
| A | c.2214G>A     | c.(2212-2214)atG>atA   |
| T | c.679C>T      | c.(679-681)Ctc>Ttc     |
| T | c.7960G>A     | c.(7960-7962)Gag>Aag   |
| A | c.3293C>T     | c.(3292-3294)tCc>tTc   |
| T | c.1182C>T     | c.(1180-1182)ccC>ccT   |
| A | c.7701A>T     | c.(7699-7701)gaA>gaT   |
| A |               |                        |
| T | c.100_splice  | c.e3-1                 |
| A |               |                        |
| A | c.444C>T      | c.(442-444)gcC>gcT     |
| A |               |                        |
| A | c.1739C>T     | c.(1738-1740)cCg>cTg   |
| A | c.217G>A      | c.(217-219)Gga>Aga     |
| C | c.1438T>C     | c.(1438-1440)Tcc>Ccc   |
| A | c.1546G>A     | c.(1546-1548)Ggg>Agg   |
| T |               |                        |
| A | c.1366C>T     | c.(1366-1368)Cat>Tat   |
| T | c.909G>T      | c.(907-909)tgG>tgT     |
| A | c.1290G>A     | c.(1288-1290)ggG>ggA   |
| A | c.1620C>T     | c.(1618-1620)ttC>ttT   |
| T | c.1732C>T     | c.(1732-1734)Ccg>Tcg   |
| T |               |                        |
| T | c.256G>A      | c.(256-258)Gag>Aag     |
| A | c.520G>A      | c.(520-522)Gat>Aat     |
| T | c.118G>A      | c.(118-120)Gag>Aag     |
| A | c.124G>A      | c.(124-126)Gaa>Aaa     |
| A | c.10472G>A    | c.(10471-10473)gGg>gAg |
| A | c.1375C>T     | c.(1375-1377)Ctg>Ttg   |
| T | c.875C>T      | c.(874-876)cCc>cTc     |
| A | c.2762C>T     | c.(2761-2763)cCc>cTc   |
| T | c.178G>A      | c.(178-180)Gac>Aac     |
| A | c.304G>A      | c.(304-306)Gaa>Aaa     |
| C | c.164A>G      | c.(163-165)aAg>aGg     |



|   |              |                        |
|---|--------------|------------------------|
| A | c.7690C>T    | c.(7690-7692)Cag>Tag   |
| A | c.1149C>T    | c.(1147-1149)atC>atT   |
| A | c.1462G>A    | c.(1462-1464)Gag>Aag   |
| C | c.4619A>G    | c.(4618-4620)gAa>gGa   |
| T | c.1978C>T    | c.(1978-1980)Cct>Tct   |
| A | c.816G>A     | c.(814-816)ggG>ggA     |
| T |              |                        |
| A |              |                        |
| T | c.2100C>T    | c.(2098-2100)tcC>tcT   |
| T | c.1165G>A    | c.(1165-1167)Gaa>Aaa   |
| A |              |                        |
| T | c.1245C>T    | c.(1243-1245)ccC>ccT   |
| C | c.3233T>C    | c.(3232-3234)tTt>tCt   |
| A | c.833G>A     | c.(832-834)cGa>cAa     |
| T | c.2796C>T    | c.(2794-2796)acC>acT   |
| A | c.93G>A      | c.(91-93)aaG>aaA       |
| T | c.2278A>T    | c.(2278-2280)Ata>Tta   |
| T | c.838G>A     | c.(838-840)Gat>Aat     |
| A | c.90G>A      | c.(88-90)atG>atA       |
| A | c.1865C>T    | c.(1864-1866)cCc>cTc   |
| T |              |                        |
| A | c.2448C>T    | c.(2446-2448)ctC>ctT   |
| G | c.936A>G     | c.(934-936)aaA>aaG     |
| A | c.84C>T      | c.(82-84)ttC>ttT       |
| A |              |                        |
| T | c.1402G>A    | c.(1402-1404)Gaa>Aaa   |
| T | c.343G>A     | c.(343-345)Gaa>Aaa     |
| T | c.30C>T      | c.(28-30)ctC>ctT       |
| A | c.871G>A     | c.(871-873)Gat>Aat     |
| C | c.6178A>G    | c.(6178-6180)Ata>Gta   |
| A | c.780C>T     | c.(778-780)ctC>ctT     |
| C | c.2427T>C    | c.(2425-2427)caT>caC   |
| T | c.285G>A     | c.(283-285)gaG>gaA     |
| T | c.635C>T     | c.(634-636)tCg>tTg     |
| T | c.28095G>A   | c.(28093-28095)atG>atA |
| T | c.19386G>A   | c.(19384-19386)ccG>ccA |
| T | c.300G>A     | c.(298-300)gcG>gcA     |
| A | c.885G>A     | c.(883-885)cgG>cgA     |
| G |              |                        |
| T | c.129_splice | c.e2-1                 |
| A | c.443C>T     | c.(442-444)tCa>tTa     |
| T | c.1141G>A    | c.(1141-1143)Gaa>Aaa   |
| A | c.274G>A     | c.(274-276)Gag>Aag     |

|   |               |                      |
|---|---------------|----------------------|
| T | c.2854C>T     | c.(2854-2856)Ctg>Ttg |
| T | c.7014C>T     | c.(7012-7014)ttC>ttT |
| G | c.279T>C      | c.(277-279)gtT>gtC   |
| T | c.2187C>T     | c.(2185-2187)ctC>ctT |
| T |               |                      |
| T | c.735C>T      | c.(733-735)gtC>gtT   |
| T | c.583C>T      | c.(583-585)Cag>Tag   |
| A | c.4365C>T     | c.(4363-4365)tcC>tcT |
| T | c.2092G>A     | c.(2092-2094)Gag>Aag |
| A | c.907_splice  | c.e9+1               |
| G | c.390C>G      | c.(388-390)ttC>ttG   |
| G | c.1700A>C     | c.(1699-1701)aAg>aGg |
| A | c.1887_splice | c.e15+1              |
| G |               |                      |
| A | c.290G>A      | c.(289-291)gGa>gAa   |
| A |               |                      |
| C | c.2796A>C     | c.(2794-2796)caA>caC |
| A | c.1234C>T     | c.(1234-1236)Cga>Tga |
| T | c.1502C>T     | c.(1501-1503)tCc>tTc |
| A | c.1123G>A     | c.(1123-1125)Gaa>Aaa |
| C | c.1750G>C     | c.(1750-1752)Gac>Cac |
| A | c.639G>A      | c.(637-639)atG>atA   |
| G | c.2422A>C     | c.(2422-2424)Ata>Cta |
| A | c.1550T>A     | c.(1549-1551)tTc>tAc |
| A | c.345C>T      |                      |
| A | c.1770G>A     | c.(1768-1770)caG>caA |
| T | c.1845G>T     | c.(1843-1845)gtG>gtT |
| T | c.9716C>T     | c.(9715-9717)cCc>cTc |
| T | c.1752C>T     | c.(1750-1752)atC>atT |
| A |               |                      |
| A | c.734C>T      | c.(733-735)gCc>gTc   |
| T | c.1350G>A     | c.(1348-1350)agG>agA |
| G | c.2947A>G     | c.(2947-2949)Acc>Gcc |
| A | c.135C>T      | c.(133-135)atC>atT   |
| A | c.1843G>A     | c.(1843-1845)Gat>Aat |
| T | c.953C>T      | c.(952-954)tCa>tTa   |
| A | c.3235C>T     | c.(3235-3237)Ctc>Ttc |
| T | c.1189G>A     | c.(1189-1191)Gaa>Aaa |
| A | c.1465G>A     | c.(1465-1467)Gag>Aag |
| T | c.748_splice  | c.e8-1               |
| T | c.4834C>T     | c.(4834-4836)Cct>Tct |
| A |               |                      |
| C | c.1793A>G     | c.(1792-1794)aAg>aGg |

|   |               |                      |
|---|---------------|----------------------|
| T | c.574C>T      | c.(574-576)Ctt>Ttt   |
| A | c.2892G>A     | c.(2890-2892)ctG>ctA |
| C | c.3233T>G     | c.(3232-3234)gTg>gGg |
| A | c.520G>A      | c.(520-522)Gat>Aat   |
| T | c.577C>A      | c.(577-579)Cac>Aac   |
| A | c.2270_splice | c.e20+1              |
| C | c.11A>G       | c.(10-12)gAa>gGa     |
| A | c.320C>T      | c.(319-321)cCg>cTg   |
| T | c.1117C>T     | c.(1117-1119)Ctg>Ttg |
| T | c.2026G>A     | c.(2026-2028)Gaa>Aaa |
| A | c.897G>A      | c.(895-897)agG>agA   |
| T | c.267C>T      | c.(265-267)ttC>ttT   |
| A | c.4811_splice | c.e12+1              |
| A |               |                      |
| A | c.556C>T      | c.(556-558)Cat>Tat   |
| T |               |                      |
| T | c.846C>A      | c.(844-846)caC>caA   |
| T | c.138G>A      | c.(136-138)aaG>aaA   |
| A |               |                      |
| T |               |                      |
| A | c.2691G>A     | c.(2689-2691)aaG>aaA |
| A | c.898G>T      | c.(898-900)Ggg>Tgg   |
| T | c.486C>T      | c.(484-486)gtC>gtT   |
| A | c.161G>A      | c.(160-162)cGg>cAg   |
| T | c.2077C>T     | c.(2077-2079)Cag>Tag |
| T | c.1408C>T     | c.(1408-1410)Cct>Tct |
| A | c.154G>A      | c.(154-156)Ggg>Agg   |
| T | c.592G>A      | c.(592-594)Gaa>Aaa   |
| A | c.422G>A      | c.(421-423)cGg>cAg   |
| T | c.424G>A      | c.(424-426)Gat>Aat   |
| A | c.1415C>T     | c.(1414-1416)cCc>cTc |
| T | c.229G>A      | c.(229-231)Gga>Aga   |
| A | c.955G>A      | c.(955-957)Gag>Aag   |
| T | c.1015_splice | c.e11+1              |
| G | c.153T>G      | c.(151-153)ctT>ctG   |
| A | c.8981C>T     | c.(8980-8982)tCc>tTc |
| A | c.326C>T      | c.(325-327)tCc>tTc   |
| T | c.1198G>A     | c.(1198-1200)Gaa>Aaa |
| T | c.279G>A      | c.(277-279)gaG>gaA   |
| T | c.360_splice  | c.e3+1               |
| T | c.1158C>T     | c.(1156-1158)gcC>gcT |
| A | c.1401G>A     | c.(1399-1401)ctG>ctA |
| A | c.1748C>T     | c.(1747-1749)tCt>tTt |

|   |            |                      |
|---|------------|----------------------|
| A | c.1464G>A  | c.(1462-1464)acG>acA |
| A | c.3276C>T  | c.(3274-3276)acC>acT |
| T | c.5828C>T  | c.(5827-5829)cCa>cTa |
| A |            |                      |
| T | c.750C>T   | c.(748-750)gtC>gtT   |
| A | c.251C>T   | c.(250-252)cCa>cTa   |
| A | c.883A>T   | c.(883-885)Atc>Ttc   |
| A | c.5128C>T  | c.(5128-5130)Cca>Tca |
| A | c.165C>T   | c.(163-165)ggC>ggT   |
| T | c.289C>T   | c.(289-291)Ctg>Ttg   |
| T | c.812C>T   | c.(811-813)cCt>cTt   |
| T | c.696C>T   | c.(694-696)tcC>tcT   |
| A |            |                      |
| T |            |                      |
| T | c.3283C>T  | c.(3283-3285)Cct>Tct |
| A | c.225C>T   | c.(223-225)atC>atT   |
| A | c.5373C>T  | c.(5371-5373)tcC>tcT |
| T | c.566C>T   | c.(565-567)tCc>tTc   |
| T |            |                      |
| A | c.1421C>T  |                      |
| A | c.1819G>A  | c.(1819-1821)Gca>Aca |
| G |            |                      |
| T | c.210G>A   | c.(208-210)ctG>ctA   |
| T | c.1309C>T  | c.(1309-1311)Cca>Tca |
| G |            |                      |
| A | c.695G>A   | c.(694-696)aGg>aAg   |
| T | c.34822C>T |                      |
| T | c.6000C>T  | c.(5998-6000)ttC>ttT |
| G | c.2254G>C  | c.(2254-2256)Gga>Cga |
| A | c.1363G>A  | c.(1363-1365)Ggc>Agc |
| T | c.5455G>A  | c.(5455-5457)Gaa>Aaa |
| A | c.277G>A   | c.(277-279)Ggg>Agg   |
| A | c.2269G>A  | c.(2269-2271)Gaa>Aaa |
| A | c.295C>T   | c.(295-297)Cga>Tga   |
| A |            |                      |
| A |            |                      |
| A | c.2097C>A  | c.(2095-2097)ccC>ccA |
| C |            |                      |
| T | c.6079C>T  | c.(6079-6081)Caa>Taa |
| T | c.5875C>T  | c.(5875-5877)Cgt>Tgt |
| T | c.666G>A   | c.(664-666)tcG>tcA   |
| A | c.737C>T   | c.(736-738)cCa>cTa   |
| T | c.1122G>T  | c.(1120-1122)atG>atT |

|   |           |                      |
|---|-----------|----------------------|
| T | c.434C>T  | c.(433-435)cCt>cTt   |
| A | c.133G>A  | c.(133-135)Gat>Aat   |
| T | c.343G>A  | c.(343-345)Gta>Ata   |
| A | c.656C>T  | c.(655-657)cCc>cTc   |
| T | c.479C>T  | c.(478-480)tCa>tTa   |
| T |           |                      |
| T | c.389C>T  | c.(388-390)tCc>tTc   |
| T |           |                      |
| A | c.1237G>A | c.(1237-1239)Gaa>Aaa |
| T | c.888G>A  | c.(886-888)ccG>ccA   |
| T | c.564G>A  | c.(562-564)atG>atA   |
| T | c.678C>T  | c.(676-678)acC>acT   |
| T | c.402C>T  | c.(400-402)ttC>ttT   |
| T | c.1429G>A | c.(1429-1431)Gaa>Aaa |
| T | c.964C>T  | c.(964-966)Cct>Tct   |
| T | c.15C>T   | c.(13-15)gtC>gtT     |
| A | c.5308C>T | c.(5308-5310)Ctg>Ttg |
| T | c.1096A>T | c.(1096-1098)Aag>Tag |
| T |           |                      |
| A | c.273C>T  | c.(271-273)gcC>gcT   |
| T | c.4356G>A | c.(4354-4356)atG>atA |
| T | c.1304C>T | c.(1303-1305)tCa>tTa |
| T | c.1913C>T | c.(1912-1914)tCc>tTc |
| A | c.975G>A  | c.(973-975)acG>acA   |
| A | c.2748G>A | c.(2746-2748)ctG>ctA |
| T | c.1512T>A | c.(1510-1512)atT>atA |
| A | c.4C>T    | c.(4-6)Ccg>Tcg       |
| A |           |                      |
| T | c.3660G>A | c.(3658-3660)ccG>ccA |
| A | c.661C>T  | c.(661-663)Cgt>Tgt   |
| A | c.1740C>T | c.(1738-1740)ttC>ttT |
| T |           |                      |
| T | c.784G>A  | c.(784-786)Ggg>Agg   |
| T | c.1495G>A | c.(1495-1497)Gat>Aat |
| T | c.8G>A    | c.(7-9)gGa>gAa       |
| T | c.776C>T  | c.(775-777)cCa>cTa   |
| T |           |                      |
| T |           |                      |
| T | c.256G>T  | c.(256-258)Gaa>Taa   |
| T |           |                      |
| T | c.3283C>T | c.(3283-3285)Ccc>Tcc |
| A | c.1965C>T | c.(1963-1965)tcC>tcT |
| A | c.409G>A  | c.(409-411)Gag>Aag   |

|   |           |                      |
|---|-----------|----------------------|
| A | c.176G>A  | c.(175-177)tGg>tAg   |
| C | c.197T>C  | c.(196-198)tTa>tCa   |
| T | c.1626C>T | c.(1624-1626)ctC>ctT |
| T | c.360C>T  | c.(358-360)gcC>gcT   |
| C |           |                      |
| A | c.408G>A  | c.(406-408)gtG>gtA   |
| A | c.1157G>A | c.(1156-1158)gGg>gAg |
| T | c.844G>A  | c.(844-846)Gaa>Aaa   |
| C |           |                      |
| T | c.826C>T  | c.(826-828)Ccc>Tcc   |
| A | c.1475C>T | c.(1474-1476)tCt>tTt |
| A |           |                      |
| T |           |                      |
| A |           |                      |
| A | c.1285G>A | c.(1285-1287)Gat>Aat |
| T |           |                      |
| T | c.1199G>A | c.(1198-1200)cGa>cAa |
| T | c.2604C>T | c.(2602-2604)ctC>ctT |
| T | c.2442G>A | c.(2440-2442)ggG>ggA |
| A | c.5154C>T | c.(5152-5154)ccC>ccT |
| A | c.330C>T  | c.(328-330)gcC>gcT   |
| A |           |                      |
| T | c.4211C>T | c.(4210-4212)aCc>aTc |
| A | c.320G>A  | c.(319-321)gGa>gAa   |
| T | c.157G>A  | c.(157-159)Gag>Aag   |
| T | c.1958C>T | c.(1957-1959)tCc>tTc |
| A | c.678G>A  | c.(676-678)aaG>aaA   |
| T | c.2353C>T | c.(2353-2355)Cgc>Tgc |
| T | c.7771G>A | c.(7771-7773)Gga>Aga |
| A | c.659G>A  | c.(658-660)gGa>gAa   |
| A | c.596C>T  | c.(595-597)tCc>tTc   |
| T |           |                      |
| T | c.5G>A    | c.(4-6)gGg>gAg       |
| A | c.1127C>T | c.(1126-1128)tCt>tTt |
| A | c.743C>T  | c.(742-744)tCc>tTc   |
| A | c.952G>A  | c.(952-954)Gag>Aag   |
| A |           |                      |
| A | c.147G>T  | c.(145-147)ttG>ttT   |
| T | c.195C>T  | c.(193-195)atC>atT   |
| T | c.4991G>A | c.(4990-4992)cGg>cAg |
| A | c.1073T>A | c.(1072-1074)tTg>tAg |
| A |           |                      |
| T | c.1405G>A | c.(1405-1407)Gag>Aag |

|   |            |                        |
|---|------------|------------------------|
| T | c.4359G>A  | c.(4357-4359)tgG>tgA   |
| A | c.1735G>A  | c.(1735-1737)Ggg>Agg   |
| T |            |                        |
| A |            |                        |
| T | c.776C>T   | c.(775-777)aCc>aTc     |
| T | c.652G>A   | c.(652-654)Gac>Aac     |
| A | c.1653C>T  | c.(1651-1653)atC>atT   |
| A | c.3133G>A  | c.(3133-3135)Gat>Aat   |
| T | c.622G>A   | c.(622-624)Gac>Aac     |
| A | c.113T>A   | c.(112-114)tTt>tAt     |
| A | c.789G>A   | c.(787-789)agG>agA     |
| A | c.1182C>T  | c.(1180-1182)ttC>ttT   |
| G |            |                        |
| T | c.16521G>A | c.(16519-16521)agG>agA |
| A | c.1140C>T  | c.(1138-1140)ccC>ccT   |
| A |            |                        |
| T | c.2812C>T  | c.(2812-2814)Cac>Tac   |
| T | c.1852C>T  | c.(1852-1854)Cct>Tct   |
| A | c.652C>T   | c.(652-654)Ccc>Tcc     |
| A |            |                        |
| C | c.1056T>C  | c.(1054-1056)tcT>tcC   |
| A | c.181C>T   | c.(181-183)Ctg>Ttg     |
| A |            |                        |
| A | c.1446C>T  | c.(1444-1446)atC>atT   |
| T | c.2593G>A  | c.(2593-2595)Gaa>Aaa   |
| T | c.600C>T   | c.(598-600)taC>taT     |
| T | c.110G>A   | c.(109-111)gGc>gAc     |
| A | c.737G>A   | c.(736-738)aGg>aAg     |
| A | c.2376C>T  | c.(2374-2376)tcC>tcT   |
| T | c.121C>T   | c.(121-123)Ccg>Tcg     |
| A | c.1123G>A  | c.(1123-1125)Gac>Aac   |
| A | c.1738C>T  | c.(1738-1740)Ccg>Tcg   |
| A | c.75G>A    | c.(73-75)agG>agA       |
| G | c.1294A>C  | c.(1294-1296)Acc>Ccc   |
| G |            |                        |
| T | c.1440C>T  | c.(1438-1440)tcC>tcT   |
| T | c.860G>A   | c.(859-861)gGg>gAg     |
| A | c.564C>T   | c.(562-564)ttC>ttT     |
| A | c.640G>A   | c.(640-642)Gaa>Aaa     |
| A | c.501G>A   | c.(499-501)agG>agA     |
| T | c.424G>A   | c.(424-426)Gat>Aat     |
| A |            |                        |

|   |               |                      |
|---|---------------|----------------------|
| T | c.1503C>T     | c.(1501-1503)atC>atT |
| T | c.4656_splice | c.e8+1               |
| A |               |                      |
| T | c.1926C>T     | c.(1924-1926)acC>acT |
| A | c.3500C>T     | c.(3499-3501)tCa>tTa |
| T | c.2363G>A     | c.(2362-2364)gGg>gAg |
| G |               |                      |
| A | c.735C>T      | c.(733-735)acC>acT   |
| T | c.1288_splice | c.e12+1              |
| A | c.1390G>A     | c.(1390-1392)Ggg>Agg |
| A | c.1604C>T     | c.(1603-1605)cCa>cTa |
| A | c.2521C>T     | c.(2521-2523)Cct>Tct |
| G | c.142A>G      | c.(142-144)Agg>Ggg   |
| T |               |                      |
| T | c.2020C>T     | c.(2020-2022)Cta>Tta |
| A | c.663C>T      | c.(661-663)atC>atT   |
| A | c.2593C>T     | c.(2593-2595)Ccc>Tcc |
| T | c.4090G>A     | c.(4090-4092)Gac>Aac |
| T | c.6703G>A     | c.(6703-6705)Gac>Aac |
| A | c.3402C>T     | c.(3400-3402)taC>taT |
| T | c.1949C>T     | c.(1948-1950)tCg>tTg |
| T | c.180C>T      | c.(178-180)tcC>tcT   |
| A | c.901C>T      | c.(901-903)Cgg>Tgg   |
| A |               |                      |
| A | c.621C>T      | c.(619-621)ccC>ccT   |
| G | c.38T>G       | c.(37-39)gTt>gGt     |
| T | c.544G>T      | c.(544-546)Ggc>Tgc   |
| T | c.801G>A      | c.(799-801)ttG>ttA   |
| A | c.582C>T      | c.(580-582)ctC>ctT   |
| A | c.282C>T      | c.(280-282)atC>atT   |
| A | c.1917C>A     | c.(1915-1917)aaC>aaA |
| T | c.869G>A      | c.(868-870)gGa>gAa   |
| T |               |                      |
| G | c.1973A>G     | c.(1972-1974)aAg>aGg |
| T | c.852C>T      | c.(850-852)ttC>ttT   |
| A | c.143G>A      | c.(142-144)cGt>cAt   |
| T | c.2375G>A     | c.(2374-2376)gGg>gAg |
| T | c.565G>A      | c.(565-567)Gga>Aga   |
| A | c.509G>A      | c.(508-510)gGg>gAg   |
| C | c.82C>G       | c.(82-84)Ctc>Gtc     |
| T |               |                      |
| A | c.1237G>A     | c.(1237-1239)Gac>Aac |
| T |               |                      |



|   |           |                      |
|---|-----------|----------------------|
| A |           |                      |
| A | c.201G>T  | c.(199-201)ttG>ttT   |
| T | c.1470G>A | c.(1468-1470)agG>agA |
| A | c.3478G>A | c.(3478-3480)Gag>Aag |
| T | c.4252C>T | c.(4252-4254)Cgt>Tgt |
| A |           |                      |
| A | c.318G>A  | c.(316-318)agG>agA   |
| G | c.7665A>G | c.(7663-7665)ctA>ctG |
| T | c.2399G>A | c.(2398-2400)gGa>gAa |
| T | c.4052C>T | c.(4051-4053)gCc>gTc |
| A | c.968G>A  | c.(967-969)gGa>gAa   |
| A |           |                      |
| T | c.1296G>A | c.(1294-1296)gtG>gtA |
| T | c.387C>T  | c.(385-387)ccC>ccT   |
| A | c.153C>T  | c.(151-153)tcC>tcT   |
| A | c.717C>T  | c.(715-717)ccC>ccT   |
| A | c.551G>A  | c.(550-552)tGg>tAg   |
| A | c.3610C>T | c.(3610-3612)Ctg>Ttg |
| A | c.924G>A  | c.(922-924)ttG>ttA   |
| T | c.2489C>T | c.(2488-2490)cCa>cTa |
| A |           |                      |
| A | c.3648G>A | c.(3646-3648)caG>caA |
| T | c.777C>T  | c.(775-777)tcC>tcT   |
| T | c.2198G>A | c.(2197-2199)cGg>cAg |
| A | c.1794C>T | c.(1792-1794)ccC>ccT |
| A | c.2437G>A | c.(2437-2439)Gaa>Aaa |
| T | c.120C>T  | c.(118-120)atC>atT   |
| A | c.1044C>T | c.(1042-1044)caC>caT |
| T |           |                      |
| A | c.1107G>A | c.(1105-1107)tgG>tgA |
| G | c.1381A>G |                      |
| A | c.1361G>A | c.(1360-1362)aGa>aAa |
| A | c.1611C>T | c.(1609-1611)gtC>gtT |
| A | c.2035G>A | c.(2035-2037)Gaa>Aaa |
| T | c.282C>T  | c.(280-282)ccC>ccT   |
| T | c.1612C>T | c.(1612-1614)Cct>Tct |
| T | c.4245G>A | c.(4243-4245)aaG>aaA |
| A | c.557G>A  | c.(556-558)gGc>gAc   |
| A | c.325G>A  | c.(325-327)Gga>Aga   |
| A | c.1174G>A | c.(1174-1176)Gag>Aag |
| T | c.258G>A  | c.(256-258)atG>atA   |
| A | c.1027C>T | c.(1027-1029)Cta>Tta |
| T | c.358C>T  | c.(358-360)Ctt>Ttt   |

|   |              |                        |
|---|--------------|------------------------|
| T | c.7890T>A    | c.(7888-7890)acT>acA   |
| T | c.231G>A     | c.(229-231)ctG>ctA     |
| A | c.3505C>T    | c.(3505-3507)Ccc>Tcc   |
| A | c.13546C>T   | c.(13546-13548)Ctc>Ttc |
| G | c.760T>C     | c.(760-762)Tat>Cat     |
| A | c.2114C>T    | c.(2113-2115)cCc>cTc   |
| T | c.3816G>A    | c.(3814-3816)ggG>ggA   |
| T | c.181C>T     | c.(181-183)Cct>Tct     |
| T | c.448G>A     | c.(448-450)Gag>Aag     |
| C | c.67G>C      | c.(67-69)Gag>Cag       |
| A | c.41G>A      | c.(40-42)aGg>aAg       |
| T | c.1654G>A    | c.(1654-1656)Gaa>Aaa   |
| A | c.60G>A      | c.(58-60)agG>agA       |
| A | c.261C>T     | c.(259-261)acC>acT     |
| A | c.1845C>T    | c.(1843-1845)ctC>ctT   |
| A | c.985G>A     | c.(985-987)Gag>Aag     |
| A |              |                        |
| T |              |                        |
| A | c.382G>A     | c.(382-384)Gga>Aga     |
| T | c.1759C>T    | c.(1759-1761)Cga>Tga   |
| T | c.524G>A     | c.(523-525)tGg>tAg     |
| A | c.4189C>T    | c.(4189-4191)Cgt>Tgt   |
| A | c.4235A>T    | c.(4234-4236)aAa>aTa   |
| A | c.846C>T     | c.(844-846)ccC>ccT     |
| A | c.378C>T     | c.(376-378)atC>atT     |
| A | c.2531G>A    |                        |
| T | c.40G>A      | c.(40-42)Gag>Aag       |
| T |              |                        |
| A | c.32520C>T   | c.(32518-32520)tcC>tcT |
| A | c.13823G>A   | c.(13822-13824)cGg>cAg |
| C | c.232A>G     | c.(232-234)Aaa>Gaa     |
| A | c.974_splice | c.e11-1                |
| G | c.221T>C     | c.(220-222)gTt>gCt     |
| A | c.841G>A     | c.(841-843)Gag>Aag     |
| A |              |                        |
| A | c.3901G>A    | c.(3901-3903)Ggg>Agg   |
| T |              |                        |
| T | c.312C>T     | c.(310-312)atC>atT     |
| T | c.3830C>T    | c.(3829-3831)cCc>cTc   |
| T | c.198C>T     | c.(196-198)ttC>ttT     |
| T | c.1756C>T    | c.(1756-1758)Ctc>Ttc   |
| T | c.73_splice  | c.e3-1                 |
| A | c.356C>T     | c.(355-357)tCc>tTc     |

|   |           |                      |
|---|-----------|----------------------|
| T | c.27G>A   | c.(25-27)acG>acA     |
| A | c.1110T>A | c.(1108-1110)ccT>ccA |
| T | c.727C>T  | c.(727-729)Ccg>Tcg   |
| T | c.1153C>T | c.(1153-1155)Cac>Tac |
| A |           |                      |
| T | c.2523C>T | c.(2521-2523)ctC>ctT |
| T | c.233G>A  | c.(232-234)gGa>gAa   |
| A |           |                      |
| A | c.2604G>A | c.(2602-2604)ggG>ggA |
| T | c.1637G>A | c.(1636-1638)aGa>aAa |
| G | c.491A>G  | c.(490-492)aAc>aGc   |
| T | c.856G>A  | c.(856-858)Gaa>Aaa   |
| T | c.298G>A  | c.(298-300)Gat>Aat   |
| A | c.119G>A  | c.(118-120)gGa>gAa   |
| A |           |                      |
| T |           |                      |
| T | c.878G>A  | c.(877-879)aGc>aAc   |
| A | c.709C>T  | c.(709-711)Cct>Tct   |
| T | c.1002C>T | c.(1000-1002)ttC>ttT |
| T | c.1393C>T | c.(1393-1395)Cac>Tac |
| A | c.117C>T  | c.(115-117)gtC>gtT   |
| T | c.492G>A  | c.(490-492)gaG>gaA   |
| T | c.1825C>T | c.(1825-1827)Caa>Taa |
| A | c.2260C>T | c.(2260-2262)Cgc>Tgc |
| T | c.1260C>T | c.(1258-1260)gcC>gcT |
| A | c.1021G>A | c.(1021-1023)Gaa>Aaa |
| A | c.1098G>A | c.(1096-1098)cgG>cgA |
| A | c.2092G>A | c.(2092-2094)Ggg>Agg |
| A |           |                      |
| A | c.3220G>A | c.(3220-3222)Gga>Aga |
| T | c.652G>A  | c.(652-654)Gaa>Aaa   |
| A |           |                      |
| T | c.173C>T  | c.(172-174)cCt>cTt   |
| A | c.1693C>A | c.(1693-1695)Ctc>Atc |
| A | c.9726C>T | c.(9724-9726)ccC>ccT |
| A | c.288G>A  | c.(286-288)ggG>ggA   |
| A | c.479G>A  | c.(478-480)gGt>gAt   |
| A | c.843C>T  | c.(841-843)ttC>ttT   |
| T | c.1980G>A | c.(1978-1980)ctG>ctA |
| C | c.500A>G  | c.(499-501)aAg>aGg   |
| C | c.233A>G  | c.(232-234)aAc>aGc   |
| T |           |                      |
| T | c.1057G>A | c.(1057-1059)Gat>Aat |

|   |            |                        |
|---|------------|------------------------|
| A | c.737G>A   | c.(736-738)cGa>cAa     |
| T | c.182C>T   | c.(181-183)cCt>cTt     |
| A | c.2817C>T  | c.(2815-2817)tcC>tcT   |
| A |            |                        |
| T | c.190G>A   | c.(190-192)Gag>Aag     |
| A | c.2889C>T  | c.(2887-2889)ttC>ttT   |
| A | c.9225C>T  | c.(9223-9225)tcC>tcT   |
| A | c.615C>A   | c.(613-615)ccC>ccA     |
| A | c.1017C>T  | c.(1015-1017)ttC>ttT   |
| T | c.679C>T   | c.(679-681)Ctg>Ttg     |
| A | c.3913G>A  | c.(3913-3915)Gaa>Aaa   |
| T | c.2866G>A  | c.(2866-2868)Gat>Aat   |
| T |            |                        |
| T | c.123C>T   | c.(121-123)ttC>ttT     |
| A | c.1580C>T  | c.(1579-1581)tCt>tTt   |
| A |            |                        |
| T | c.3138G>A  | c.(3136-3138)ctG>ctA   |
| T |            |                        |
| C | c.139T>G   | c.(139-141)Tgt>Ggt     |
| A | c.3244C>T  | c.(3244-3246)Ctc>Ttc   |
| A | c.578G>A   | c.(577-579)gGa>gAa     |
| A | c.6690G>A  | c.(6688-6690)acG>acA   |
| T | c.4493G>A  | c.(4492-4494)aGg>aAg   |
| T | c.222G>A   | c.(220-222)ggG>ggA     |
| A | c.293C>T   | c.(292-294)tCc>tTc     |
| A | c.582G>A   | c.(580-582)gtG>gtA     |
| A | c.538G>A   | c.(538-540)Gag>Aag     |
| A | c.3706C>T  | c.(3706-3708)Cag>Tag   |
| A | c.934G>A   | c.(934-936)Gga>Aga     |
| A | c.2847C>T  | c.(2845-2847)atC>atT   |
| T | c.1241C>T  | c.(1240-1242)tCc>tTc   |
| T |            |                        |
| C |            |                        |
| A | c.968T>A   | c.(967-969)tTa>tAa     |
| T | c.25561G>A | c.(25561-25563)Gat>Aat |
| T | c.241C>T   | c.(241-243)Cgc>Tgc     |
| A | c.2048G>T  | c.(2047-2049)cGa>cTa   |
| T | c.247G>A   | c.(247-249)Gct>Act     |
| T | c.3869C>T  | c.(3868-3870)tCc>tTc   |
| T |            |                        |
| A | c.235G>A   | c.(235-237)Gag>Aag     |
| G | c.1670A>G  | c.(1669-1671)aAc>aGc   |
| A |            |                        |

|   |               |                      |
|---|---------------|----------------------|
| A | c.573C>T      |                      |
| A | c.2627C>T     | c.(2626-2628)gCt>gTt |
| G |               |                      |
| T |               |                      |
| A | c.252G>A      | c.(250-252)ctG>ctA   |
| T | c.69G>A       | c.(67-69)atG>atA     |
| T |               |                      |
| T | c.53C>T       | c.(52-54)tCc>tTc     |
| A | c.1201G>A     | c.(1201-1203)Ggg>Agg |
| C | c.29T>G       | c.(28-30)cTg>cGg     |
| A | c.1313C>T     | c.(1312-1314)tCa>tTa |
| T |               |                      |
| T | c.1872G>A     | c.(1870-1872)ccG>ccA |
| A | c.215C>T      | c.(214-216)cCc>cTc   |
| T | c.482_splice  | c.e6-1               |
| A |               |                      |
| T | c.1910G>A     | c.(1909-1911)cGg>cAg |
| A | c.1180G>A     | c.(1180-1182)Gga>Aga |
| C | c.2551A>C     |                      |
| T | c.4321_splice | c.e25+1              |
| T | c.4764C>T     | c.(4762-4764)atC>atT |
| T | c.595A>T      | c.(595-597)Aag>Tag   |
| T |               |                      |
| T |               |                      |
| A |               |                      |
| A |               |                      |
| A | c.837T>A      | c.(835-837)ttT>ttA   |
| A | c.31G>A       | c.(31-33)Gaa>Aaa     |
| A | c.276G>A      | c.(274-276)acG>acA   |
| A |               |                      |
| A | c.1610C>T     | c.(1609-1611)cCt>cTt |
| T | c.502G>A      | c.(502-504)Gag>Aag   |
| A | c.1018C>T     | c.(1018-1020)Ctt>Ttt |
| A | c.154C>T      | c.(154-156)Ccg>Tcg   |
| T | c.346G>A      | c.(346-348)Gtt>Att   |
| A | c.719C>T      | c.(718-720)tCt>tTt   |
| G | c.1193A>G     | c.(1192-1194)aAt>aGt |
| A | c.549C>T      | c.(547-549)ctC>ctT   |
| T | c.1587C>T     | c.(1585-1587)gtC>gtT |
| T | c.714G>A      | c.(712-714)ctG>ctA   |
| T | c.4837C>T     | c.(4837-4839)Cct>Tct |
| A |               |                      |
| G | c.1626T>C     | c.(1624-1626)ggT>ggC |

|   |                |                      |
|---|----------------|----------------------|
| T | c.358G>A       | c.(358-360)Gga>Aga   |
| T |                |                      |
| A | c.819C>T       | c.(817-819)atC>atT   |
| A | c.1209C>T      | c.(1207-1209)atC>atT |
| A | c.551C>T       | c.(550-552)aCc>aTc   |
| A | c.247C>T       | c.(247-249)Cgg>Tgg   |
| A | c.236_splice   | c.e3-1               |
| A | c.795G>A       | c.(793-795)atG>atA   |
| A | c.865G>A       | c.(865-867)Gag>Aag   |
| A | c.91C>T        | c.(91-93)Cgg>Tgg     |
| T | c.789C>T       | c.(787-789)ccC>ccT   |
| T | c.6549G>A      | c.(6547-6549)atG>atA |
| A | c.1517G>A      | c.(1516-1518)gGc>gAc |
| T |                |                      |
| T | c.13492_splice | c.e78-1              |
| A | c.1887G>A      | c.(1885-1887)aaG>aaA |
| A | c.1492G>A      | c.(1492-1494)Gat>Aat |
| A | c.1186C>T      | c.(1186-1188)Cgt>Tgt |
| T | c.288C>T       | c.(286-288)aaC>aaT   |
| T | c.658_splice   | c.e7-1               |
| A | c.2018G>A      | c.(2017-2019)gGa>gAa |
| T | c.2343C>T      | c.(2341-2343)atC>atT |
| A |                |                      |
| A | c.228C>T       | c.(226-228)atC>atT   |
| A | c.859C>T       | c.(859-861)Cta>Tta   |
| T |                |                      |
| T |                |                      |
| A |                |                      |
| A | c.2535_splice  | c.e22-1              |
| A | c.1145C>T      | c.(1144-1146)tCg>tTg |
| T |                |                      |
| T |                |                      |
| A | c.918C>T       | c.(916-918)atC>atT   |
| A | c.951G>A       | c.(949-951)agG>agA   |
| A | c.968C>T       | c.(967-969)tCt>tTt   |
| A | c.7330G>A      | c.(7330-7332)Gag>Aag |
| A | c.1417C>T      | c.(1417-1419)Cct>Tct |
| A | c.1898C>T      | c.(1897-1899)tCc>tTc |
| T |                |                      |
| T | c.608C>T       | c.(607-609)cCa>cTa   |
| G | c.120T>C       | c.(118-120)taT>taC   |
| T | c.390G>A       | c.(388-390)acG>acA   |
| A | c.1076G>A      | c.(1075-1077)gGg>gAg |

|   |           |                      |
|---|-----------|----------------------|
| A | c.5580C>T | c.(5578-5580)tcC>tcT |
| T | c.9359C>T | c.(9358-9360)tCt>tTt |
| T | c.2076C>T | c.(2074-2076)taC>taT |
| T | c.3354C>T | c.(3352-3354)ttC>ttT |
| T | c.385C>T  | c.(385-387)Cca>Tca   |
| T | c.1367G>A | c.(1366-1368)gGa>gAa |
| T |           |                      |
| T | c.467G>A  | c.(466-468)cGa>cAa   |
| T | c.690A>T  | c.(688-690)caA>caT   |
| G | c.821T>G  | c.(820-822)tTc>tGc   |
| A | c.598G>A  | c.(598-600)Gaa>Aaa   |
| T | c.467C>T  | c.(466-468)tCc>tTc   |
| T | c.1979C>T | c.(1978-1980)cCt>cTt |
| A | c.672G>A  | c.(670-672)agG>agA   |
| T | c.4910G>A | c.(4909-4911)aGa>aAa |
| A | c.2410G>A | c.(2410-2412)Gaa>Aaa |
| A | c.102G>A  | c.(100-102)ctG>ctA   |
| T | c.660C>T  | c.(658-660)tcC>tcT   |
| T | c.2007G>A | c.(2005-2007)aaG>aaA |
| A | c.1167C>T | c.(1165-1167)ccC>ccT |
| C | c.1708T>C | c.(1708-1710)Ttt>Ctt |
| T | c.409C>T  | c.(409-411)Ccc>Tcc   |
| A |           |                      |
| T | c.5179C>T | c.(5179-5181)Cag>Tag |
| T | c.117C>T  | c.(115-117)gcC>gcT   |
| T | c.226G>A  | c.(226-228)Gat>Aat   |
| T | c.2160C>T | c.(2158-2160)atC>atT |
| T |           |                      |
| T | c.2561C>T | c.(2560-2562)tCc>tTc |
| A | c.540C>T  | c.(538-540)ccC>ccT   |
| T | c.684C>T  | c.(682-684)gcC>gcT   |
| A | c.379G>A  | c.(379-381)Gag>Aag   |
| A | c.2815G>A | c.(2815-2817)Gaa>Aaa |
| G | c.2684T>C | c.(2683-2685)cTc>cCc |
| C | c.1223A>G | c.(1222-1224)gAc>gGc |
| T | c.674G>A  | c.(673-675)gGa>gAa   |
| T |           |                      |
| A | c.712G>A  | c.(712-714)Gac>Aac   |
| A | c.38C>T   | c.(37-39)cCc>cTc     |
| A |           |                      |
| G | c.163A>G  | c.(163-165)Agc>Ggc   |
| A | c.3919C>T | c.(3919-3921)Cct>Tct |
| A |           |                      |

|   |               |                      |
|---|---------------|----------------------|
| A | c.2692G>A     | c.(2692-2694)Gac>Aac |
| A | c.1743C>T     | c.(1741-1743)ttC>ttT |
| T |               |                      |
| T | c.1697C>T     | c.(1696-1698)gCc>gTc |
| A | c.2924T>A     | c.(2923-2925)aTa>aAa |
| A | c.197C>T      | c.(196-198)tCa>tTa   |
| A | c.192G>A      | c.(190-192)ggG>ggA   |
| A | c.1840C>T     | c.(1840-1842)Ctg>Ttg |
| A | c.493_splice  | c.e8-1               |
| T | c.711C>A      |                      |
| T |               |                      |
| T | c.491G>A      | c.(490-492)cGa>cAa   |
| T | c.1998_splice | c.e16-1              |
| A | c.459C>T      | c.(457-459)ttC>ttT   |
| T | c.3187C>T     | c.(3187-3189)Cag>Tag |
| T | c.6309G>A     | c.(6307-6309)agG>agA |
| T | c.180C>T      | c.(178-180)gcC>gcT   |
| T |               |                      |
| T | c.7967C>T     | c.(7966-7968)aCc>aTc |
| T | c.988C>T      | c.(988-990)Cac>Tac   |
| G | c.371T>C      | c.(370-372)cTc>cCc   |
| T | c.138T>A      | c.(136-138)ctT>ctA   |
| T | c.1692T>A     | c.(1690-1692)gtT>gtA |
| T | c.2608G>A     | c.(2608-2610)Gaa>Aaa |
| A | c.2436C>T     | c.(2434-2436)ctC>ctT |
| A |               |                      |
| T |               |                      |
| A | c.785G>A      | c.(784-786)tGg>tAg   |
| T |               |                      |
| T |               |                      |
| A | c.112G>A      | c.(112-114)Gaa>Aaa   |
| A | c.3585_splice | c.e33+1              |
| T | c.709G>A      | c.(709-711)Gaa>Aaa   |
| A | c.1678C>T     | c.(1678-1680)Cca>Tca |
| A | c.989G>A      | c.(988-990)aGc>aAc   |
| T | c.928G>A      | c.(928-930)Gag>Aag   |
| T | c.15C>T       | c.(13-15)ggC>ggT     |
| T | c.4803C>T     | c.(4801-4803)ttC>ttT |
| T |               |                      |
| T | c.383C>T      | c.(382-384)cCt>cTt   |
| A | c.2959G>A     | c.(2959-2961)Gag>Aag |
| T | c.2049C>T     | c.(2047-2049)tgC>tgT |



|   |           |                      |
|---|-----------|----------------------|
| T | c.721G>A  | c.(721-723)Gaa>Aaa   |
| A |           |                      |
| A |           |                      |
| T | c.320G>A  | c.(319-321)gGg>gAg   |
| A | c.496G>A  | c.(496-498)Gac>Aac   |
| T | c.51G>A   | c.(49-51)acG>acA     |
| A | c.108C>T  | c.(106-108)tcC>tcT   |
| A | c.2206G>A | c.(2206-2208)Ggg>Agg |
| A | c.739C>T  | c.(739-741)Ctg>Ttg   |
| T |           |                      |
| A |           |                      |
| A | c.368G>A  | c.(367-369)gGg>gAg   |
| A | c.5982C>T | c.(5980-5982)ctC>ctT |
| A | c.1385G>A | c.(1384-1386)gGa>gAa |
| T | c.562C>T  | c.(562-564)Ctt>Ttt   |
| T | c.87C>T   | c.(85-87)atC>atT     |
| T | c.2266C>T | c.(2266-2268)Cta>Tta |
| T | c.4310G>A | c.(4309-4311)tGg>tAg |
| A |           |                      |
| A | c.786G>A  | c.(784-786)tgG>tgA   |
| T | c.2015C>T | c.(2014-2016)aCc>aTc |
| T | c.1431G>A | c.(1429-1431)aaG>aaA |
| A | c.6740C>T | c.(6739-6741)aCc>aTc |
| A | c.9G>A    | c.(7-9)caG>caA       |
| T |           |                      |
| A |           |                      |
| C |           |                      |
| A | c.121C>T  | c.(121-123)Ctt>Ttt   |
| A | c.3G>A    | c.(1-3)atG>atA       |
| A | c.1137C>T | c.(1135-1137)tcC>tcT |
| T | c.219G>A  | c.(217-219)agG>agA   |
| T | c.929C>T  | c.(928-930)tCc>tTc   |
| A | c.917C>T  | c.(916-918)tCc>tTc   |
| A |           |                      |
| T | c.714G>T  | c.(712-714)ccG>ccT   |
| T | c.1969G>A | c.(1969-1971)Gat>Aat |
| A |           |                      |
| T | c.1870C>A | c.(1870-1872)Cct>Act |
| T | c.1581G>A | c.(1579-1581)aaG>aaA |
| A | c.4011C>T | c.(4009-4011)gtC>gtT |
| C | c.673A>G  |                      |
| A | c.8515G>A | c.(8515-8517)Gac>Aac |
| T | c.384C>T  | c.(382-384)ttC>ttT   |

|   |           |                      |
|---|-----------|----------------------|
| A | c.478T>A  | c.(478-480)Ttc>Atc   |
| A | c.666T>A  | c.(664-666)ccT>ccA   |
| T | c.4399C>T | c.(4399-4401)Ccg>Tcg |
| T | c.694G>A  | c.(694-696)Gat>Aat   |
| A | c.150G>A  | c.(148-150)gcG>gcA   |
| A | c.210G>A  | c.(208-210)agG>agA   |
| C | c.2564A>C | c.(2563-2565)cAg>cCg |
| A | c.2083C>T | c.(2083-2085)Ctc>Ttc |
| T | c.2047A>T | c.(2047-2049)Aac>Tac |
| T | c.149C>T  | c.(148-150)cCa>cTa   |
| T | c.261G>A  | c.(259-261)agG>agA   |
| A |           |                      |
| T | c.556G>A  | c.(556-558)Ggg>Agg   |
| A | c.426C>T  | c.(424-426)ccC>ccT   |
| T |           |                      |
| T | c.1404C>T | c.(1402-1404)caC>caT |
| T |           |                      |
| A | c.678G>A  | c.(676-678)agG>agA   |
| A |           |                      |
| A | c.4720G>A | c.(4720-4722)Gat>Aat |
| G |           |                      |
| A | c.788C>T  | c.(787-789)tCc>tTc   |
| A | c.342G>A  | c.(340-342)ctG>ctA   |
| A | c.457G>A  | c.(457-459)Ggg>Agg   |
| T |           |                      |
| T | c.255C>T  | c.(253-255)atC>atT   |
| A |           |                      |
| A | c.406G>A  | c.(406-408)Gag>Aag   |
| T | c.2657T>A | c.(2656-2658)cTc>cAc |
| A | c.261G>A  | c.(259-261)caG>caA   |
| T | c.1038C>T | c.(1036-1038)gcC>gcT |
| A | c.1343C>T | c.(1342-1344)tCa>tTa |
| A | c.1040C>T | c.(1039-1041)tCt>tTt |
| A | c.23G>A   | c.(22-24)gGg>gAg     |
| T | c.1420G>A | c.(1420-1422)Gat>Aat |
| A | c.1699G>T | c.(1699-1701)Gtg>Ttg |
| T | c.2069G>A | c.(2068-2070)gGa>gAa |
| T |           |                      |
| A | c.1082G>A | c.(1081-1083)cGa>cAa |
| A | c.814C>T  | c.(814-816)Cct>Tct   |
| A | c.867G>T  | c.(865-867)gtG>gtT   |
| T | c.658G>A  | c.(658-660)Gag>Aag   |
| A |           |                      |

|   |           |                      |
|---|-----------|----------------------|
| A | c.2696G>A | c.(2695-2697)gGg>gAg |
| T | c.7142C>T | c.(7141-7143)cCt>cTt |
| A | c.693C>T  | c.(691-693)atC>atT   |
| C |           |                      |
| T | c.524G>A  | c.(523-525)cGa>cAa   |
| A |           |                      |
| A |           |                      |
| T |           |                      |
| T |           |                      |
| G | c.356A>G  | c.(355-357)aAa>aGa   |
| A | c.473C>T  | c.(472-474)cCa>cTa   |
| T | c.2785C>T | c.(2785-2787)Cac>Tac |
| A | c.929T>A  |                      |
| A | c.203C>T  | c.(202-204)cCa>cTa   |
| T |           |                      |
| T | c.2196C>T | c.(2194-2196)ccC>ccT |
| T | c.3376C>T | c.(3376-3378)Cag>Tag |
| T | c.705G>A  | c.(703-705)aaG>aaA   |
| A | c.3394G>A | c.(3394-3396)Ggc>Agc |
| A | c.914G>A  | c.(913-915)gGa>gAa   |
| T | c.13G>A   | c.(13-15)Gtc>Atc     |
| T |           |                      |
| A | c.3337G>A | c.(3337-3339)Gat>Aat |
| A | c.141C>T  | c.(139-141)atC>atT   |
| A | c.1445C>T | c.(1444-1446)gCt>gTt |
| A | c.1521G>A | c.(1519-1521)ggG>ggA |
| T |           |                      |
| T |           |                      |
| A | c.1384G>A | c.(1384-1386)Gtg>Atg |
| T | c.90G>A   | c.(88-90)cgG>cgA     |
| T | c.6494C>T | c.(6493-6495)tCg>tTg |
| A | c.193C>T  | c.(193-195)Ccc>Tcc   |
| A | c.500G>A  | c.(499-501)aGa>aAa   |
| T | c.451C>T  | c.(451-453)Cta>Tta   |
| A | c.1004C>T | c.(1003-1005)cCg>cTg |
| T | c.1423C>T | c.(1423-1425)Cat>Tat |
| A | c.237G>A  | c.(235-237)ttG>ttA   |
| A | c.1326G>A | c.(1324-1326)atG>atA |
| T | c.305G>A  | c.(304-306)gGa>gAa   |
| A | c.548C>T  | c.(547-549)tCc>tTc   |
| T | c.323C>T  | c.(322-324)cCc>cTc   |
| T | c.549C>T  | c.(547-549)gtC>gtT   |
| A | c.8047G>T | c.(8047-8049)Gag>Tag |

|   |              |                        |
|---|--------------|------------------------|
| T | c.3684C>T    | c.(3682-3684)ttC>ttT   |
| T | c.1910G>A    | c.(1909-1911)gGt>gAt   |
| T | c.1381C>T    | c.(1381-1383)Cgt>Tgt   |
| T | c.1195G>A    | c.(1195-1197)Ggg>Agg   |
| A | c.1421C>T    | c.(1420-1422)cCg>cTg   |
| T | c.27G>A      | c.(25-27)acG>acA       |
| A | c.1956C>T    | c.(1954-1956)ttC>ttT   |
| T | c.233C>T     | c.(232-234)tCc>tTc     |
| T | c.744C>T     | c.(742-744)tcC>tcT     |
| T | c.529G>A     | c.(529-531)Gac>Aac     |
| T | c.793_splice | c.e7-1                 |
| T | c.583C>T     | c.(583-585)Cgt>Tgt     |
| A | c.1924C>T    | c.(1924-1926)Ctc>Ttc   |
| A |              |                        |
| A | c.1841C>T    | c.(1840-1842)cCt>cTt   |
| A | c.852C>T     | c.(850-852)atC>atT     |
| C | c.277A>C     | c.(277-279)Aaa>Caa     |
| A | c.1079C>T    | c.(1078-1080)tCc>tTc   |
| A | c.323C>T     | c.(322-324)tCc>tTc     |
| A | c.649C>T     | c.(649-651)Cga>Tga     |
| T | c.1620G>A    | c.(1618-1620)ctG>ctA   |
| A | c.1581C>T    | c.(1579-1581)acC>acT   |
| T | c.2929C>T    | c.(2929-2931)Ccc>Tcc   |
| T | c.88C>T      | c.(88-90)Cgc>Tgc       |
| T | c.5842C>T    | c.(5842-5844)Ccc>Tcc   |
| A | c.687C>T     | c.(685-687)atC>atT     |
| A | c.1267C>T    | c.(1267-1269)Cag>Tag   |
| T | c.17483C>T   | c.(17482-17484)tCt>tTt |
| A | c.3613C>T    | c.(3613-3615)Cag>Tag   |
| T | c.295G>A     | c.(295-297)Gag>Aag     |
| T | c.1996G>A    | c.(1996-1998)Gaa>Aaa   |
| A |              |                        |
| T | c.394C>T     | c.(394-396)Cgc>Tgc     |
| A | c.932G>A     | c.(931-933)gGc>gAc     |
| A | c.909C>T     | c.(907-909)ccC>ccT     |
| A | c.664G>A     | c.(664-666)Gag>Aag     |
| T |              |                        |
| T | c.2426C>T    | c.(2425-2427)tCt>tTt   |
| T | c.3224C>T    | c.(3223-3225)cCc>cTc   |
| A |              |                        |
| T | c.241G>T     | c.(241-243)Gag>Tag     |
| T | c.369C>T     | c.(367-369)gcC>gcT     |
| A | c.1865C>T    | c.(1864-1866)gCc>gTc   |

|   |               |                        |
|---|---------------|------------------------|
| T | c.804C>T      | c.(802-804)ttC>ttT     |
| A | c.911C>T      | c.(910-912)cCc>cTc     |
| T | c.3463C>T     | c.(3463-3465)Cga>Tga   |
| T | c.248C>T      | c.(247-249)aCc>aTc     |
| T | c.11245C>T    | c.(11245-11247)Cgt>Tgt |
| T |               |                        |
| A | c.2133G>A     | c.(2131-2133)agG>agA   |
| T | c.1403G>A     | c.(1402-1404)gGg>gAg   |
| T | c.229C>T      | c.(229-231)Ccg>Tcg     |
| A |               |                        |
| T | c.671C>T      | c.(670-672)tCt>tTt     |
| A |               |                        |
| A | c.979C>T      | c.(979-981)Cgg>Tgg     |
| T | c.637G>A      | c.(637-639)Gat>Aat     |
| A |               |                        |
| T | c.1551_splice | c.e16+1                |
| A | c.17584C>T    | c.(17584-17586)Ctg>Ttg |
| A | c.1434C>T     | c.(1432-1434)acC>acT   |
| T |               |                        |
| A | c.1102T>A     | c.(1102-1104)Ttc>Atc   |
| T | c.721G>A      | c.(721-723)Gaa>Aaa     |
| A | c.106C>T      | c.(106-108)Cat>Tat     |
| T | c.138C>T      | c.(136-138)atC>atT     |
| T | c.4526C>T     | c.(4525-4527)tCt>tTt   |
| T | c.876C>T      | c.(874-876)tcC>tcT     |
| C | c.2520_splice | c.e21+1                |
| T | c.5920C>T     | c.(5920-5922)Cca>Tca   |
| T | c.2344C>T     | c.(2344-2346)Ctc>Ttc   |
| A | c.187_splice  | c.e4-1                 |
| T | c.1256C>T     | c.(1255-1257)tCt>tTt   |
| T | c.755G>A      | c.(754-756)cGg>cAg     |
| T |               |                        |
| T | c.221G>A      | c.(220-222)gGg>gAg     |
| A | c.1143G>A     | c.(1141-1143)atG>atA   |
| A | c.221C>T      | c.(220-222)tCc>tTc     |
| A | c.356G>A      | c.(355-357)cGg>cAg     |
| T | c.1917C>T     | c.(1915-1917)taC>taT   |
| T | c.1927C>T     | c.(1927-1929)Ctt>Ttt   |
| T | c.9C>T        | c.(7-9)aaC>aaT         |
| A |               |                        |
| A | c.1397C>T     | c.(1396-1398)cCa>cTa   |
| T | c.1163C>T     | c.(1162-1164)tCc>tTc   |
| T | c.551C>T      | c.(550-552)tCt>tTt     |

|   |              |                      |
|---|--------------|----------------------|
| T |              |                      |
| T | c.180C>A     | c.(178-180)ccC>ccA   |
| A | c.193G>A     | c.(193-195)Gaa>Aaa   |
| A |              |                      |
| A | c.262G>T     | c.(262-264)Gag>Tag   |
| A | c.399C>T     | c.(397-399)atC>atT   |
| T | c.600C>T     | c.(598-600)gcC>gcT   |
| T |              |                      |
| T | c.219C>T     | c.(217-219)tcC>tcT   |
| A | c.552C>T     | c.(550-552)atC>atT   |
| A | c.5613C>T    | c.(5611-5613)ttC>ttT |
| T | c.603G>A     | c.(601-603)gaG>gaA   |
| T | c.1393A>T    | c.(1393-1395)Aag>Tag |
| A |              |                      |
| T | c.154G>A     | c.(154-156)Gtg>Atg   |
| T | c.1414C>T    | c.(1414-1416)Ccg>Tcg |
| A | c.246C>T     | c.(244-246)ttC>ttT   |
| A |              |                      |
| T | c.8216C>T    | c.(8215-8217)cCc>cTc |
| A | c.2044G>A    | c.(2044-2046)Gat>Aat |
| A | c.847C>T     | c.(847-849)Cct>Tct   |
| A | c.406C>T     | c.(406-408)Cct>Tct   |
| A | c.5007C>T    | c.(5005-5007)gcC>gcT |
| T | c.107G>A     | c.(106-108)gGa>gAa   |
| T | c.2423C>T    | c.(2422-2424)tCt>tTt |
| T | c.3805G>A    | c.(3805-3807)Gat>Aat |
| T | c.514C>T     | c.(514-516)Ccg>Tcg   |
| A | c.744C>T     | c.(742-744)atC>atT   |
| A | c.1828G>A    | c.(1828-1830)Gaa>Aaa |
| A | c.2139C>T    | c.(2137-2139)ttC>ttT |
| T | c.1359C>T    | c.(1357-1359)ttC>ttT |
| T | c.5160C>T    |                      |
| T | c.386C>T     | c.(385-387)cCt>cTt   |
| T | c.572_splice | c.e2+1               |
| T |              |                      |
| C |              |                      |
| T | c.866T>A     | c.(865-867)gTg>gAg   |
| T | c.4138G>A    | c.(4138-4140)Gaa>Aaa |
| T | c.190G>A     | c.(190-192)Gag>Aag   |
| C | c.5173A>G    | c.(5173-5175)Att>Gtt |
| T | c.444C>T     | c.(442-444)ctC>ctT   |
| A |              |                      |
| G | c.1318T>C    | c.(1318-1320)Tct>Cct |

|   |            |                        |
|---|------------|------------------------|
| T | c.363G>A   | c.(361-363)agG>agA     |
| G | c.1120T>C  | c.(1120-1122)Tct>Cct   |
| A | c.735C>T   | c.(733-735)gcC>gcT     |
| T | c.176C>T   | c.(175-177)cCc>cTc     |
| T |            |                        |
| T | c.2160C>T  | c.(2158-2160)ctC>ctT   |
| T |            |                        |
| A | c.8554G>A  | c.(8554-8556)Gaa>Aaa   |
| A | c.184C>T   | c.(184-186)Cct>Tct     |
| A | c.2544C>T  | c.(2542-2544)gcC>gcT   |
| T | c.768C>T   | c.(766-768)acC>acT     |
| T | c.10845C>T | c.(10843-10845)ttC>ttT |
| T | c.2247G>A  | c.(2245-2247)gtG>gtA   |
| T |            |                        |
| T | c.537C>T   | c.(535-537)ttC>ttT     |
| A |            |                        |
| T | c.934C>T   | c.(934-936)Ctg>Ttg     |
| T |            |                        |
| A | c.363C>T   | c.(361-363)tcC>tcT     |
| G | c.582T>C   | c.(580-582)ctT>ctC     |
| T | c.1053C>T  | c.(1051-1053)atC>atT   |
| A | c.597C>T   | c.(595-597)ttC>ttT     |
| T | c.884G>A   | c.(883-885)cGa>cAa     |
| A | c.997G>A   | c.(997-999)Gag>Aag     |
| T | c.636C>T   | c.(634-636)ccC>ccT     |
| T | c.1064C>T  | c.(1063-1065)tCa>tTa   |
| T | c.696C>T   | c.(694-696)gtC>gtT     |
| A | c.1601G>A  | c.(1600-1602)gGg>gAg   |
| A | c.1066G>A  | c.(1066-1068)Gga>Aga   |
| T | c.1156G>A  | c.(1156-1158)Ggg>Agg   |
| G |            |                        |
| T | c.1280G>A  | c.(1279-1281)gGa>gAa   |
| T | c.2528C>T  | c.(2527-2529)gCc>gTc   |
| T | c.1118G>A  | c.(1117-1119)aGg>aAg   |
| A | c.132G>A   | c.(130-132)aaG>aaA     |
| T | c.3792G>A  | c.(3790-3792)ctG>ctA   |
| A | c.1880C>T  | c.(1879-1881)gCc>gTc   |
| T | c.458C>T   | c.(457-459)tCt>tTt     |
| A | c.74G>A    | c.(73-75)gGa>gAa       |
| T | c.1877C>T  | c.(1876-1878)tCt>tTt   |
| A | c.3275C>T  | c.(3274-3276)aCc>aTc   |
| A | c.34G>A    | c.(34-36)Ggg>Agg       |
| T | c.2456G>A  | c.(2455-2457)cGg>cAg   |

|   |              |                        |
|---|--------------|------------------------|
| A | c.130C>T     | c.(130-132)Cct>Tct     |
| A | c.139_splice | c.e1+1                 |
| A | c.9G>A       | c.(7-9)gcG>gcA         |
| A | c.986C>T     | c.(985-987)cCc>cTc     |
| A | c.285G>A     | c.(283-285)ggG>ggA     |
| A | c.75G>A      | c.(73-75)caG>caA       |
| A | c.40C>T      | c.(40-42)Cgg>Tgg       |
| T | c.780C>T     | c.(778-780)atC>atT     |
| T | c.805G>A     | c.(805-807)Gag>Aag     |
| A | c.6436C>T    | c.(6436-6438)Cgt>Tgt   |
| T | c.1596A>T    | c.(1594-1596)aaA>aaT   |
| A |              |                        |
| T | c.1079G>A    | c.(1078-1080)gGa>gAa   |
| A | c.2223C>T    | c.(2221-2223)ttC>ttT   |
| T | c.1290C>T    | c.(1288-1290)ttC>ttT   |
| A |              |                        |
| T | c.522G>A     | c.(520-522)tcG>tcA     |
| A | c.759G>A     | c.(757-759)aaG>aaA     |
| A | c.973G>A     | c.(973-975)Gag>Aag     |
| A | c.878G>A     | c.(877-879)aGc>aAc     |
| A | c.330C>T     | c.(328-330)atC>atT     |
| A | c.5839C>T    | c.(5839-5841)Ccg>Tcg   |
| T | c.965C>T     | c.(964-966)cCt>cTt     |
| T | c.900G>A     | c.(898-900)gaG>gaA     |
| T | c.582G>A     | c.(580-582)agG>agA     |
| A | c.9438C>T    | c.(9436-9438)atC>atT   |
| T | c.25952G>A   | c.(25951-25953)gGg>gAg |
| T | c.265G>A     | c.(265-267)Gag>Aag     |
| T | c.2647C>T    | c.(2647-2649)Cgt>Tgt   |
| - | c.1447delT   | c.(1447-1449)tttfs     |
| T |              |                        |
| A | c.28C>T      | c.(28-30)Ctt>Ttt       |
| T | c.2982G>A    | c.(2980-2982)ccG>ccA   |
| A | c.3088G>A    | c.(3088-3090)Ggc>Agc   |
| G | c.587A>G     | c.(586-588)gAa>gGa     |
| T | c.819C>T     | c.(817-819)ttC>ttT     |
| T |              |                        |
| T | c.1423C>T    | c.(1423-1425)Cgg>Tgg   |
| A | c.1706C>T    | c.(1705-1707)cCc>cTc   |
| T | c.1239C>T    | c.(1237-1239)ttC>ttT   |
| A | c.417C>T     | c.(415-417)ttC>ttT     |
| T | c.117C>T     | c.(115-117)atC>atT     |
| T | c.694C>T     | c.(694-696)Cct>Tct     |



|   |           |                      |
|---|-----------|----------------------|
| T | c.1792G>A | c.(1792-1794)Gag>Aag |
| T | c.1614G>A | c.(1612-1614)ggG>ggA |
| A | c.1292C>T | c.(1291-1293)tCc>tTc |
| T | c.617G>A  | c.(616-618)gGc>gAc   |
| A | c.639C>T  | c.(637-639)atC>atT   |
| T | c.869C>T  | c.(868-870)cCc>cTc   |
| T | c.792C>T  | c.(790-792)ttC>ttT   |
| A | c.945G>A  | c.(943-945)agG>agA   |
| A | c.1198C>T | c.(1198-1200)Cat>Tat |
| A | c.904G>A  | c.(904-906)Gag>Aag   |
| T | c.344C>T  | c.(343-345)cCc>cTc   |
| T | c.1507C>T | c.(1507-1509)Caa>Taa |
| A | c.924C>T  | c.(922-924)gaC>gaT   |
| A | c.1331G>A | c.(1330-1332)aGa>aAa |
| A | c.448G>A  | c.(448-450)Gat>Aat   |
| T | c.307G>A  | c.(307-309)Gga>Aga   |
| T | c.371G>A  | c.(370-372)aGg>aAg   |
| T | c.1239C>T | c.(1237-1239)ttC>ttT |
| A | c.364G>A  | c.(364-366)Gag>Aag   |
| T | c.3348C>T | c.(3346-3348)gcC>gcT |
| A | c.3631G>A | c.(3631-3633)Ggt>Agt |
| T | c.42G>A   | c.(40-42)gcG>gcA     |
| A | c.1069G>A | c.(1069-1071)Gaa>Aaa |
| T | c.449C>T  | c.(448-450)cCc>cTc   |
| A | c.2652C>T | c.(2650-2652)gcC>gcT |
| C |           |                      |
| T |           |                      |
| T | c.1507G>A | c.(1507-1509)Gaa>Aaa |
| T | c.1969C>T |                      |
| T | c.279C>T  | c.(277-279)ttC>ttT   |
| T | c.469G>A  | c.(469-471)Gat>Aat   |
| A | c.4958C>T | c.(4957-4959)cCt>cTt |
| T | c.2284C>T | c.(2284-2286)Cag>Tag |
| T | c.725G>A  | c.(724-726)gGc>gAc   |
| T | c.3925C>T | c.(3925-3927)Cca>Tca |
| T | c.97G>A   | c.(97-99)Gat>Aat     |
| A | c.97G>A   | c.(97-99)Gac>Aac     |
| A | c.1694G>A | c.(1693-1695)cGg>cAg |
| T | c.534C>T  | c.(532-534)gcC>gcT   |
| T | c.397G>A  | c.(397-399)Gaa>Aaa   |
| A | c.539C>T  | c.(538-540)tCt>tTt   |
| G | c.5260A>C | c.(5260-5262)Aag>Cag |
| T | c.1861C>T | c.(1861-1863)Caa>Taa |

|   |              |                      |
|---|--------------|----------------------|
| T | c.1158G>A    | c.(1156-1158)atG>atA |
| T | c.618G>A     | c.(616-618)caG>caA   |
| T | c.1086C>T    | c.(1084-1086)gtC>gtT |
| A | c.2835G>A    | c.(2833-2835)ttG>ttA |
| C | c.392T>G     | c.(391-393)gTt>gGt   |
| T | c.785G>A     | c.(784-786)cGa>cAa   |
| A | c.3976G>A    | c.(3976-3978)Gct>Act |
| A | c.935G>A     | c.(934-936)aGg>aAg   |
| A | c.729G>A     | c.(727-729)tcG>tcA   |
| A | c.2743C>T    | c.(2743-2745)Cca>Tca |
| A | c.960G>A     | c.(958-960)agG>agA   |
| A | c.367C>T     | c.(367-369)Ctg>Ttg   |
| T | c.2588C>T    | c.(2587-2589)cCc>cTc |
| A | c.1861G>A    | c.(1861-1863)Gct>Act |
| A | c.2521C>T    | c.(2521-2523)Ctc>Ttc |
| T | c.216C>T     | c.(214-216)tcC>tcT   |
| T | c.743C>T     | c.(742-744)tCc>tTc   |
| A | c.270C>T     | c.(268-270)acC>acT   |
| G | c.1919A>G    | c.(1918-1920)aAc>aGc |
| A | c.1197C>T    | c.(1195-1197)tcC>tcT |
| T | c.207C>T     | c.(205-207)ctC>ctT   |
| A | c.464C>T     | c.(463-465)aCt>aTt   |
| A | c.255G>A     | c.(253-255)aaG>aaA   |
| A | c.441C>T     | c.(439-441)tcC>tcT   |
| T | c.666C>T     | c.(664-666)ctC>ctT   |
| A | c.778C>T     | c.(778-780)Ccc>Tcc   |
| A | c.1158C>T    | c.(1156-1158)agC>agT |
| A | c.5C>T       | c.(4-6)tCc>tTc       |
| C | c.182A>G     | c.(181-183)cAa>cGa   |
| G | c.1273T>C    | c.(1273-1275)Tcc>Ccc |
| A | c.166_splice | c.e3-1               |
| A | c.1732G>A    | c.(1732-1734)Gac>Aac |
| T | c.1778C>T    | c.(1777-1779)cCa>cTa |
| T |              |                      |
| A | c.1810C>T    | c.(1810-1812)Cat>Tat |
| T | c.769C>T     | c.(769-771)Ccc>Tcc   |
| T | c.1403C>T    | c.(1402-1404)tCt>tTt |
| T | c.5965G>A    | c.(5965-5967)Gaa>Aaa |
| C | c.414T>C     | c.(412-414)tcT>tcC   |
| A | c.934G>T     | c.(934-936)Gtt>Ttt   |
| A | c.996C>T     | c.(994-996)atC>atT   |
| A |              |                      |
| A | c.447C>T     | c.(445-447)ttC>ttT   |

|   |              |                      |
|---|--------------|----------------------|
| T | c.2444C>T    | c.(2443-2445)cCg>cTg |
| T | c.931G>A     | c.(931-933)Gac>Aac   |
| T | c.837G>A     | c.(835-837)acG>acA   |
| T | c.786C>T     | c.(784-786)gcC>gcT   |
| T | c.1573C>T    | c.(1573-1575)Cag>Tag |
| T | c.190G>A     | c.(190-192)Gag>Aag   |
| A | c.51C>T      | c.(49-51)ctC>ctT     |
| T | c.73G>A      | c.(73-75)Gaa>Aaa     |
| T | c.424C>T     | c.(424-426)Cgg>Tgg   |
| T | c.2450G>A    | c.(2449-2451)gGa>gAa |
| A | c.272C>T     | c.(271-273)tCc>tTc   |
| T | c.1505C>T    | c.(1504-1506)cCt>cTt |
| A | c.246G>A     | c.(244-246)gtG>gtA   |
| T | c.825C>T     | c.(823-825)atC>atT   |
| A | c.3570C>T    | c.(3568-3570)ctC>ctT |
| A |              |                      |
| A | c.1306C>T    | c.(1306-1308)Ctt>Ttt |
| A | c.59G>A      | c.(58-60)tGg>tAg     |
| T | c.312_splice | c.e4-1               |
| T |              |                      |
| T | c.891C>T     | c.(889-891)tcC>tcT   |
| G | c.629T>C     | c.(628-630)gTt>gCt   |
| T | c.6769G>A    | c.(6769-6771)Gag>Aag |
| T |              |                      |
| A | c.302G>A     | c.(301-303)aGa>aAa   |
| A | c.688G>A     | c.(688-690)Gag>Aag   |
| T |              |                      |
| A | c.1611C>T    | c.(1609-1611)caC>caT |
| C | c.4622A>G    | c.(4621-4623)gAa>gGa |
| A |              |                      |
| A | c.4475C>T    | c.(4474-4476)tCa>tTa |
| A | c.562C>T     |                      |
| A | c.2401C>T    | c.(2401-2403)Cca>Tca |
| A | c.238C>T     | c.(238-240)Caa>Taa   |
| A | c.354G>A     | c.(352-354)atG>atA   |
| T | c.639C>T     | c.(637-639)agC>agT   |
| T | c.170C>T     | c.(169-171)tCg>tTg   |
| T | c.812G>A     | c.(811-813)cGg>cAg   |
| T | c.493C>T     | c.(493-495)Ccg>Tcg   |
| G |              |                      |
| A | c.2248C>T    | c.(2248-2250)Ccg>Tcg |
| G | c.520T>C     | c.(520-522)Ttc>Ctc   |
| T | c.1139C>T    | c.(1138-1140)cCg>cTg |

|   |               |                        |
|---|---------------|------------------------|
| A | c.2236C>T     | c.(2236-2238)Cgc>Tgc   |
| A | c.698G>A      | c.(697-699)gGa>gAa     |
| T | c.894C>T      | c.(892-894)ttC>ttT     |
| T | c.2015C>T     | c.(2014-2016)tCg>tTg   |
| A | c.33896C>T    | c.(33895-33897)cCt>cTt |
| T | c.956C>T      |                        |
| T | c.71T>A       | c.(70-72)cTg>cAg       |
| A | c.3703C>T     | c.(3703-3705)Cca>Tca   |
| T | c.288C>T      | c.(286-288)taC>taT     |
| A | c.344G>A      |                        |
| T | c.6371C>T     | c.(6370-6372)tCc>tTc   |
| T | c.4374C>T     | c.(4372-4374)ttC>ttT   |
| T | c.2914C>T     | c.(2914-2916)Cga>Tga   |
| A | c.216G>A      | c.(214-216)tgG>tgA     |
| A |               |                        |
| A | c.427G>A      | c.(427-429)Gat>Aat     |
| A | c.312C>T      | c.(310-312)gcC>gcT     |
| A | c.1280C>T     | c.(1279-1281)tCc>tTc   |
| A | c.3504C>T     | c.(3502-3504)ttC>ttT   |
| A | c.308G>A      | c.(307-309)cGa>cAa     |
| A | c.1084C>T     | c.(1084-1086)Ccg>Tcg   |
| A |               |                        |
| A | c.400C>T      |                        |
| A | c.2177G>A     | c.(2176-2178)gGg>gAg   |
| A | c.6228C>T     | c.(6226-6228)tcC>tcT   |
| T | c.4012_splice | c.e34-1                |
| A | c.658_splice  | c.e6+1                 |
| T | c.2029G>A     | c.(2029-2031)Gag>Aag   |
| A | c.287C>T      | c.(286-288)aCc>aTc     |
| A | c.552G>A      | c.(550-552)cgG>cgA     |
| A | c.2493G>A     | c.(2491-2493)caG>caA   |
| A | c.867G>A      | c.(865-867)caG>caA     |
| A |               |                        |
| T | c.204C>T      | c.(202-204)tcC>tcT     |
| A |               |                        |
| A | c.2887G>A     | c.(2887-2889)Gag>Aag   |
| A | c.2630C>T     | c.(2629-2631)tCa>tTa   |
| A | c.1597C>T     | c.(1597-1599)Cgt>Tgt   |
| A | c.3077G>A     | c.(3076-3078)gGg>gAg   |
| A | c.1830C>T     | c.(1828-1830)ctC>ctT   |
| T | c.131G>A      |                        |
| A | c.1305G>A     | c.(1303-1305)cgG>cgA   |
| A | c.276C>T      | c.(274-276)atC>atT     |

|   |           |                      |
|---|-----------|----------------------|
| A | c.135G>A  | c.(133-135)atG>atA   |
| T | c.4849G>A | c.(4849-4851)Gag>Aag |
| A |           |                      |
| C | c.7778T>C | c.(7777-7779)aTa>aCa |
| T | c.43G>A   |                      |
| A |           |                      |
| T | c.2294C>T | c.(2293-2295)tCc>tTc |
| T | c.34C>T   | c.(34-36)Ctg>Ttg     |
| A | c.394G>A  | c.(394-396)Gca>Aca   |
| T | c.1138C>T | c.(1138-1140)Cag>Tag |
| T | c.45C>A   | c.(43-45)gcC>gcA     |
| G | c.833A>G  | c.(832-834)aAc>aGc   |
| A | c.160C>T  | c.(160-162)Ccc>Tcc   |
| T | c.52G>A   | c.(52-54)Gga>Aga     |
| A | c.3744C>T | c.(3742-3744)ttC>ttT |
| T | c.913G>A  | c.(913-915)Gga>Aga   |
| A |           |                      |
| T | c.15C>T   | c.(13-15)ttC>ttT     |
| A | c.6679C>T | c.(6679-6681)Cca>Tca |
| T | c.535G>A  | c.(535-537)Gag>Aag   |
| T |           |                      |
| A |           |                      |
| A | c.605C>A  | c.(604-606)aCa>aAa   |
| T | c.1578C>T | c.(1576-1578)tcC>tcT |
| T | c.988C>T  | c.(988-990)Cag>Tag   |
| G | c.1130G>C | c.(1129-1131)cGg>cCg |
| T | c.450C>T  | c.(448-450)ttC>ttT   |
| A | c.734C>T  | c.(733-735)aCc>aTc   |
| T | c.2565C>T | c.(2563-2565)atC>atT |
| A | c.286G>A  | c.(286-288)Gtg>Atg   |
| T | c.815C>T  | c.(814-816)tCa>tTa   |
| T | c.1654G>A | c.(1654-1656)Gaa>Aaa |
| T | c.3785C>T | c.(3784-3786)gCc>gTc |
| T | c.1051G>A | c.(1051-1053)Gag>Aag |
| T | c.1456C>T | c.(1456-1458)Ccg>Tcg |
| T |           |                      |
| T | c.225C>T  |                      |
| T | c.133C>T  | c.(133-135)Ccc>Tcc   |
| A | c.1253C>T | c.(1252-1254)tCg>tTg |
| T | c.87C>T   | c.(85-87)gtC>gtT     |
| A | c.3161C>T | c.(3160-3162)tCt>tTt |
| T | c.1367G>A | c.(1366-1368)gGg>gAg |
| T |           |                      |

|   |              |                        |
|---|--------------|------------------------|
| A | c.11466C>T   | c.(11464-11466)acC>acT |
| A |              |                        |
| A | c.1134C>T    | c.(1132-1134)ttC>ttT   |
| A | c.428G>A     | c.(427-429)gGc>gAc     |
| A | c.136G>A     | c.(136-138)Gag>Aag     |
| G | c.471G>C     | c.(469-471)gaG>gaC     |
| T | c.1567G>A    | c.(1567-1569)Ggg>Agg   |
| A | c.1878G>A    | c.(1876-1878)agG>agA   |
| A | c.330C>T     | c.(328-330)atC>atT     |
| A | c.829C>T     | c.(829-831)Cga>Tga     |
| T | c.1651G>A    | c.(1651-1653)Gtg>Atg   |
| G | c.520G>C     | c.(520-522)Gac>Cac     |
| T | c.481C>T     | c.(481-483)Ctg>Ttg     |
| T | c.814G>A     | c.(814-816)Gag>Aag     |
| T | c.868C>T     | c.(868-870)Cca>Tca     |
| A | c.627G>A     | c.(625-627)ttG>ttA     |
| A | c.3289C>T    | c.(3289-3291)Cct>Tct   |
| T | c.1756C>T    | c.(1756-1758)Cct>Tct   |
| A | c.586G>A     | c.(586-588)Gcg>Acg     |
| T | c.139C>T     | c.(139-141)Cgg>Tgg     |
| T | c.225_splice | c.e4-1                 |
| A | c.1498G>A    | c.(1498-1500)Gat>Aat   |
| T | c.694C>T     | c.(694-696)Ccc>Tcc     |
| T | c.556G>A     | c.(556-558)Gcc>Acc     |
| T | c.215C>T     | c.(214-216)tCc>tTc     |
| T | c.106C>T     | c.(106-108)Cgt>Tgt     |
| A | c.2060C>T    | c.(2059-2061)tCc>tTc   |
| T |              |                        |
| C |              |                        |
| A | c.2067T>A    | c.(2065-2067)gtT>gtA   |
| T | c.801C>T     | c.(799-801)tcC>tcT     |
| T | c.1224C>T    | c.(1222-1224)tcC>tcT   |
| T |              |                        |
| A | c.3338C>T    | c.(3337-3339)cCc>cTc   |
| T | c.131G>A     | c.(130-132)gGc>gAc     |
| T | c.679G>A     | c.(679-681)Gaa>Aaa     |
| T | c.1773G>A    | c.(1771-1773)tgG>tgA   |
| T | c.148C>T     | c.(148-150)Ctg>Ttg     |
| T |              |                        |
| A | c.292C>T     | c.(292-294)Cga>Tga     |
| T |              |                        |
| A | c.3235G>A    | c.(3235-3237)Gac>Aac   |
| T |              |                        |

|   |           |                      |
|---|-----------|----------------------|
| A | c.699C>T  | c.(697-699)gtC>gtT   |
| A | c.237C>T  | c.(235-237)ccC>ccT   |
| A |           |                      |
| A | c.3354C>T | c.(3352-3354)ttC>ttT |
| T | c.4565G>A | c.(4564-4566)gGa>gAa |
| A | c.2175C>T | c.(2173-2175)tcC>tcT |
| A | c.393G>A  | c.(391-393)atG>atA   |
| A | c.1259G>A | c.(1258-1260)gGa>gAa |
| T |           |                      |
| C | c.470A>C  | c.(469-471)aAc>aCc   |
| A | c.2548C>T | c.(2548-2550)Ccg>Tcg |
| A | c.1028C>T | c.(1027-1029)tCa>tTa |
| A | c.223C>T  | c.(223-225)Cgg>Tgg   |
| A | c.1355C>T | c.(1354-1356)cCt>cTt |
| T | c.1083G>A | c.(1081-1083)agG>agA |
| T | c.1591C>T | c.(1591-1593)Cct>Tct |
| A | c.2808C>T | c.(2806-2808)gcC>gcT |
| T |           |                      |
| T | c.957C>T  | c.(955-957)ccC>ccT   |
| A | c.1242C>T | c.(1240-1242)atC>atT |
| T | c.163C>T  | c.(163-165)Cac>Tac   |
| A | c.2042G>A | c.(2041-2043)cGa>cAa |
| T | c.699C>T  | c.(697-699)ttC>ttT   |
| T | c.8354C>T | c.(8353-8355)tCc>tTc |
| A | c.327C>T  | c.(325-327)atC>atT   |
| T | c.389C>T  | c.(388-390)cCa>cTa   |
| A | c.2912C>T | c.(2911-2913)cCc>cTc |
| T | c.826C>T  | c.(826-828)Cac>Tac   |
| T | c.201C>T  | c.(199-201)ctC>ctT   |
| T | c.1705C>T | c.(1705-1707)Cct>Tct |
| A | c.4886C>T | c.(4885-4887)tCt>tTt |
| T | c.1553G>A | c.(1552-1554)cGg>cAg |
| A | c.1351G>A | c.(1351-1353)Gaa>Aaa |
| T | c.1114G>A | c.(1114-1116)Ggg>Agg |
| T | c.24G>A   | c.(22-24)tcG>tcA     |
| A |           |                      |
| A | c.237G>A  | c.(235-237)atG>atA   |
| A | c.2247G>A | c.(2245-2247)tcG>tcA |
| A | c.14C>T   | c.(13-15)tCc>tTc     |
| A | c.1506G>A | c.(1504-1506)caG>caA |
| G |           |                      |
| A | c.1192G>A | c.(1192-1194)Gag>Aag |
| A | c.4125C>T | c.(4123-4125)tcC>tcT |

|   |              |                      |
|---|--------------|----------------------|
| A |              |                      |
| A | c.799G>A     | c.(799-801)Gaa>Aaa   |
| A | c.1314C>T    | c.(1312-1314)tcC>tcT |
| T | c.98C>T      | c.(97-99)tCg>tTg     |
| T | c.2276C>T    | c.(2275-2277)cCg>cTg |
| A |              |                      |
| A |              |                      |
| T | c.868G>A     | c.(868-870)Gac>Aac   |
| T | c.1528C>T    | c.(1528-1530)Ccc>Tcc |
| A | c.997C>T     | c.(997-999)Ccc>Tcc   |
| C | c.2047T>C    | c.(2047-2049)Ttt>Ctt |
| T |              |                      |
| A | c.160G>A     | c.(160-162)Gat>Aat   |
| C |              |                      |
| A | c.1089C>T    | c.(1087-1089)tcC>tcT |
| T | c.4051G>A    | c.(4051-4053)Gat>Aat |
| A | c.978C>T     | c.(976-978)gaC>gaT   |
| T | c.1248G>A    | c.(1246-1248)gtG>gtA |
| A | c.315C>T     | c.(313-315)acC>acT   |
| T | c.944G>A     | c.(943-945)tGg>tAg   |
| T |              |                      |
| T | c.289C>T     | c.(289-291)Ctc>Ttc   |
| T | c.44C>T      | c.(43-45)tCc>tTc     |
| T | c.480C>T     | c.(478-480)ttC>ttT   |
| A | c.1088G>A    | c.(1087-1089)gGa>gAa |
| T | c.1261C>T    | c.(1261-1263)Cgc>Tgc |
| T | c.542C>T     | c.(541-543)tCc>tTc   |
| A | c.55_splice  | c.e11-1              |
| T |              |                      |
| A | c.188C>T     | c.(187-189)cCg>cTg   |
| A |              |                      |
| A | c.1304G>A    | c.(1303-1305)cGg>cAg |
| T | c.586G>A     | c.(586-588)Gaa>Aaa   |
| A | c.2042C>T    | c.(2041-2043)tCa>tTa |
| T | c.232C>T     | c.(232-234)Ccc>Tcc   |
| A | c.658G>A     | c.(658-660)Ggt>Agt   |
| A | c.298G>A     | c.(298-300)Ggg>Agg   |
| T | c.1001T>A    | c.(1000-1002)tTt>tAt |
| T | c.1291G>A    | c.(1291-1293)Gac>Aac |
| T |              |                      |
| A |              |                      |
| T |              |                      |
| A | c.343_splice | c.e3+1               |



|   |            |                      |
|---|------------|----------------------|
| T | c.1212C>T  | c.(1210-1212)ttC>ttT |
| A | c.353G>A   | c.(352-354)gGa>gAa   |
| A | c.1023G>A  | c.(1021-1023)atG>atA |
| T | c.6201C>T  | c.(6199-6201)tcC>tcT |
| T | c.1729G>A  | c.(1729-1731)Gaa>Aaa |
| A | c.221G>A   | c.(220-222)cGa>cAa   |
| A |            |                      |
| T | c.506C>T   | c.(505-507)tCc>tTc   |
| A | c.637C>T   | c.(637-639)Ccc>Tcc   |
| T | c.446C>T   | c.(445-447)tCc>tTc   |
| A | c.4943A>T  | c.(4942-4944)gAt>gTt |
| T | c.3866C>T  | c.(3865-3867)gCc>gTc |
| T | c.3084C>T  | c.(3082-3084)ttC>ttT |
| C | c.1098T>G  | c.(1096-1098)taT>taG |
| A |            |                      |
| A | c.3768G>A  | c.(3766-3768)gtG>gtA |
| T | c.4439C>T  | c.(4438-4440)aCt>aTt |
| T | c.1143C>T  | c.(1141-1143)ttC>ttT |
| A | c.116C>T   | c.(115-117)cCc>cTc   |
| T | c.5337G>A  | c.(5335-5337)agG>agA |
| T | c.5449G>A  | c.(5449-5451)Gag>Aag |
| T | c.851G>A   | c.(850-852)aGt>aAt   |
| T | c.598G>A   |                      |
| A | c.811G>A   | c.(811-813)Gac>Aac   |
| T | c.3660G>A  | c.(3658-3660)aaG>aaA |
| T | c.3077C>T  | c.(3076-3078)cCc>cTc |
| A | c.63C>T    | c.(61-63)ccC>ccT     |
| T | c.1379C>T  | c.(1378-1380)aCt>aTt |
| A | c.5422C>T  | c.(5422-5424)Cct>Tct |
| A |            |                      |
| A | c.1202G>A  | c.(1201-1203)gGg>gAg |
| T | c.2746G>A  | c.(2746-2748)Gaa>Aaa |
| T | c.388C>T   | c.(388-390)Ccc>Tcc   |
| A | c.1107C>T  | c.(1105-1107)atC>atT |
| A | c.452C>T   | c.(451-453)cCc>cTc   |
| T | c.1965C>T  | c.(1963-1965)ccC>ccT |
| A | c.2465C>T  | c.(2464-2466)cCc>cTc |
| T | c.107C>T   | c.(106-108)aCg>aTg   |
| T | c.1269C>T  | c.(1267-1269)ctC>ctT |
| T | c.376C>T   | c.(376-378)Cgt>Tgt   |
| T | c.2239C>T  | c.(2239-2241)Cgg>Tgg |
| T | c.336C>T   | c.(334-336)atC>atT   |
| T | c.33205G>A |                      |

|   |              |                      |
|---|--------------|----------------------|
| T | c.814C>T     | c.(814-816)Cct>Tct   |
| T | c.1114G>A    | c.(1114-1116)Gat>Aat |
| T | c.692G>A     | c.(691-693)gGa>gAa   |
| A | c.6782C>T    | c.(6781-6783)cCt>cTt |
| T | c.1285G>A    | c.(1285-1287)Ggc>Agc |
| T |              |                      |
| A |              |                      |
| A | c.675G>A     | c.(673-675)ggG>ggA   |
| T |              |                      |
| A | c.6448G>A    | c.(6448-6450)Gag>Aag |
| A | c.588G>A     | c.(586-588)aaG>aaA   |
| T | c.1223C>T    | c.(1222-1224)tCc>tTc |
| A |              |                      |
| T | c.1995G>A    | c.(1993-1995)ggG>ggA |
| T |              |                      |
| A | c.1426C>T    | c.(1426-1428)Cgg>Tgg |
| A | c.309C>T     | c.(307-309)tcC>tcT   |
| T | c.852C>T     | c.(850-852)agC>agT   |
| T |              |                      |
| A |              |                      |
| T | c.472G>A     | c.(472-474)Gat>Aat   |
| A | c.3913G>A    | c.(3913-3915)Gat>Aat |
| A | c.216C>T     | c.(214-216)ctC>ctT   |
| T | c.89C>T      | c.(88-90)gCc>gTc     |
| T | c.34C>T      | c.(34-36)Cca>Tca     |
| G | c.8C>G       |                      |
| C |              |                      |
| A |              |                      |
| A | c.2601C>T    | c.(2599-2601)caC>caT |
| T | c.100C>T     | c.(100-102)Cca>Tca   |
| A | c.1456G>A    | c.(1456-1458)Gaa>Aaa |
| T | c.288C>T     | c.(286-288)gcC>gcT   |
| T | c.4341G>A    | c.(4339-4341)tgG>tgA |
| T | c.1016C>T    | c.(1015-1017)tCc>tTc |
| A | c.1473C>T    | c.(1471-1473)aaC>aaT |
| A | c.1206G>A    | c.(1204-1206)ctG>ctA |
| T | c.1162C>T    | c.(1162-1164)Ccc>Tcc |
| G | c.349_splice | c.e2+1               |
| A | c.2113G>A    | c.(2113-2115)Gat>Aat |
| A | c.694C>T     | c.(694-696)Cgc>Tgc   |
| T | c.537C>T     | c.(535-537)tcC>tcT   |
| A | c.3769G>A    | c.(3769-3771)Gat>Aat |
| T | c.645G>A     | c.(643-645)ggG>ggA   |

|   |              |                      |
|---|--------------|----------------------|
| T | c.326_splice | c.e4-1               |
| A | c.679C>T     | c.(679-681)Ccc>Tcc   |
| T | c.2141C>T    | c.(2140-2142)cCa>cTa |
| T | c.1791G>A    | c.(1789-1791)ctG>ctA |
| A | c.2558C>T    | c.(2557-2559)cCc>cTc |
| C | c.858A>C     | c.(856-858)ctA>ctC   |
| T | c.529G>A     | c.(529-531)Gac>Aac   |
| A | c.2789C>T    | c.(2788-2790)cCa>cTa |
| T | c.1478C>T    | c.(1477-1479)tCc>tTc |
| T | c.3550G>A    | c.(3550-3552)Gaa>Aaa |
| T | c.1029C>T    | c.(1027-1029)ttC>ttT |
| A | c.3362C>T    | c.(3361-3363)cCa>cTa |
| A | c.2928C>T    | c.(2926-2928)ccC>ccT |
| A | c.3108C>T    | c.(3106-3108)atC>atT |
| T | c.2617G>A    | c.(2617-2619)Gac>Aac |
| G | c.80A>C      | c.(79-81)cAc>cCc     |
| T |              |                      |
| T | c.327C>T     | c.(325-327)acC>acT   |
| A |              |                      |
| T | c.948C>T     | c.(946-948)atC>atT   |
| A | c.115C>T     | c.(115-117)Ccc>Tcc   |
| A | c.1017C>T    | c.(1015-1017)ttC>ttT |
| T | c.1798C>T    | c.(1798-1800)Cct>Tct |
| T |              |                      |
| T | c.1111G>A    | c.(1111-1113)Gaa>Aaa |
| A | c.1293C>T    | c.(1291-1293)tcC>tcT |
| T | c.4954G>A    | c.(4954-4956)Gaa>Aaa |
| T | c.3157C>T    | c.(3157-3159)Ctc>Ttc |
| G | c.589T>C     | c.(589-591)Ttg>Ctg   |
| T | c.932G>A     | c.(931-933)gGg>gAg   |
| A | c.1866G>A    | c.(1864-1866)gaG>gaA |
| A |              |                      |
| T | c.338C>T     | c.(337-339)tCc>tTc   |
| A | c.671C>T     | c.(670-672)gCt>gTt   |
| A | c.5231G>A    | c.(5230-5232)gGa>gAa |
| T | c.549G>A     | c.(547-549)agG>agA   |
| A | c.249G>A     | c.(247-249)gaG>gaA   |
| T | c.1075C>T    | c.(1075-1077)Ctt>Ttt |
| A | c.536G>A     | c.(535-537)aGg>aAg   |
| A | c.2185C>T    | c.(2185-2187)Cct>Tct |
| A | c.661G>A     | c.(661-663)Gaa>Aaa   |
| T | c.109G>A     |                      |
| T | c.1416C>T    | c.(1414-1416)ttC>ttT |

|   |              |                      |
|---|--------------|----------------------|
| A | c.2498C>T    | c.(2497-2499)tCc>tTc |
| A |              |                      |
| T | c.6422C>T    | c.(6421-6423)aCc>aTc |
| A | c.1522C>A    | c.(1522-1524)Cgc>Agc |
| T | c.2930C>T    | c.(2929-2931)tCc>tTc |
| A | c.1886C>T    | c.(1885-1887)gCc>gTc |
| A | c.3076G>A    | c.(3076-3078)Ggg>Agg |
| A | c.110C>T     | c.(109-111)aCa>aTa   |
| A | c.574C>T     | c.(574-576)Ctg>Ttg   |
| T | c.2314C>T    | c.(2314-2316)Cct>Tct |
| A | c.848C>T     | c.(847-849)gCc>gTc   |
| A |              |                      |
| A |              |                      |
| A | c.3756C>T    | c.(3754-3756)atC>atT |
| T |              |                      |
| T | c.2275C>T    | c.(2275-2277)Ctc>Ttc |
| T | c.164C>T     | c.(163-165)cCc>cTc   |
| T | c.278C>T     | c.(277-279)tCc>tTc   |
| A | c.2196C>T    | c.(2194-2196)ctC>ctT |
| A | c.2089C>T    | c.(2089-2091)Ccg>Tcg |
| A | c.-42_splice | c.e1-1               |
| A | c.4528C>T    | c.(4528-4530)Cgc>Tgc |
| A | c.1072C>T    | c.(1072-1074)Cac>Tac |
| T |              |                      |
| T | c.361G>A     | c.(361-363)Gag>Aag   |
| A | c.4236C>T    | c.(4234-4236)tcC>tcT |
| A | c.1234C>T    | c.(1234-1236)Cag>Tag |
| A |              |                      |
| A | c.424G>A     | c.(424-426)Gaa>Aaa   |
| T |              |                      |
| T | c.640G>A     | c.(640-642)Gaa>Aaa   |
| T | c.1899G>A    | c.(1897-1899)gtG>gtA |
| T | c.423C>T     | c.(421-423)acC>acT   |
| T | c.483C>T     | c.(481-483)ttC>ttT   |
| T | c.9616G>A    | c.(9616-9618)Gaa>Aaa |
| T | c.631G>A     | c.(631-633)Ggg>Agg   |
| A | c.875C>T     | c.(874-876)tCc>tTc   |
| T | c.307C>T     | c.(307-309)Ctg>Ttg   |
| A | c.2018C>T    | c.(2017-2019)tCg>tTg |
| A | c.1195C>T    | c.(1195-1197)Ctc>Ttc |
| A | c.39C>T      | c.(37-39)ttC>ttT     |
| A | c.250G>A     | c.(250-252)Ggt>Agt   |
| T | c.2826C>T    | c.(2824-2826)gtC>gtT |

|   |              |                      |
|---|--------------|----------------------|
| A | c.863G>A     | c.(862-864)gGc>gAc   |
| A | c.607C>T     | c.(607-609)Cca>Tca   |
| A | c.349C>T     | c.(349-351)Cat>Tat   |
| A | c.216C>T     | c.(214-216)ttC>ttT   |
| T | c.2617G>A    | c.(2617-2619)Gac>Aac |
| A | c.142_splice | c.e1+1               |
| T | c.315C>T     | c.(313-315)ctC>ctT   |
| A | c.133G>A     | c.(133-135)Gaa>Aaa   |
| T | c.544G>A     | c.(544-546)Gga>Aga   |
| A | c.550G>A     | c.(550-552)Gaa>Aaa   |
| A | c.1495C>T    | c.(1495-1497)Ccc>Tcc |
| A | c.1825C>T    | c.(1825-1827)Ctc>Ttc |
| T | c.1446C>T    | c.(1444-1446)tcC>tcT |
| A | c.1113C>T    | c.(1111-1113)ttC>ttT |
| T | c.384G>A     | c.(382-384)gaG>gaA   |
| A | c.1241G>A    | c.(1240-1242)gGa>gAa |
| T |              |                      |
| T | c.130G>A     | c.(130-132)Gaa>Aaa   |
| A | c.2575G>A    | c.(2575-2577)Gaa>Aaa |
| A |              |                      |
| A | c.203C>T     | c.(202-204)tCc>tTc   |
| T | c.3158C>T    | c.(3157-3159)tCa>tTa |
| A |              |                      |
| A | c.789C>T     | c.(787-789)acC>acT   |
| T | c.654C>T     | c.(652-654)ctC>ctT   |
| T | c.352C>T     | c.(352-354)Ccg>Tcg   |
| T | c.536C>T     | c.(535-537)tCc>tTc   |
| T | c.1994C>T    | c.(1993-1995)tCt>tTt |
| T | c.485G>A     | c.(484-486)tGg>tAg   |
| A | c.1255C>T    | c.(1255-1257)Cca>Tca |
| T | c.2977C>T    | c.(2977-2979)Cgc>Tgc |
| A | c.2621C>T    | c.(2620-2622)aCc>aTc |
| T | c.5717C>T    | c.(5716-5718)aCc>aTc |
| A | c.671C>T     | c.(670-672)cCc>cTc   |
| T | c.3012C>T    |                      |
| A | c.636G>A     | c.(634-636)agG>agA   |
| T | c.1395G>A    | c.(1393-1395)aaG>aaa |
| C | c.1314A>G    | c.(1312-1314)gcA>gcG |
| A | c.477_splice | c.e5+1               |
| A | c.77C>T      | c.(76-78)cCc>cTc     |
| T | c.377_splice | c.e3-1               |
| T | c.1313T>A    | c.(1312-1314)tTc>tAc |
| T | c.288G>A     | c.(286-288)ggG>ggA   |

|   |              |                      |
|---|--------------|----------------------|
| T | c.207_splice | c.e3-1               |
| T | c.2756G>A    | c.(2755-2757)tGg>tAg |
| A | c.1699C>T    | c.(1699-1701)Cat>Tat |
| T | c.1737G>A    |                      |
| A |              |                      |
| T | c.34G>A      | c.(34-36)Gcc>Acc     |
| T | c.922G>A     | c.(922-924)Gag>Aag   |
| T | c.1163C>T    | c.(1162-1164)tCg>tTg |
| A | c.2474C>T    | c.(2473-2475)tCc>tTc |
| A | c.458G>A     | c.(457-459)aGa>aAa   |
| T | c.823C>T     | c.(823-825)Cct>Tct   |
| A |              |                      |
| T | c.1064C>T    | c.(1063-1065)tCc>tTc |
| T |              |                      |
| A | c.5423C>T    | c.(5422-5424)cCt>cTt |
| A | c.8141C>T    | c.(8140-8142)cCa>cTa |
| T | c.957G>A     | c.(955-957)atG>atA   |
| A | c.806G>A     | c.(805-807)gGt>gAt   |
| T |              |                      |
| T | c.2097G>A    | c.(2095-2097)ctG>ctA |
| A | c.1769C>T    | c.(1768-1770)cCc>cTc |
| A | c.807C>T     | c.(805-807)atC>atT   |
| A | c.1019G>A    | c.(1018-1020)gGt>gAt |
| A | c.890G>A     | c.(889-891)cGg>cAg   |
| T | c.2102C>T    | c.(2101-2103)gCc>gTc |
| T | c.950C>T     | c.(949-951)gCc>gTc   |
| A | c.3296G>A    | c.(3295-3297)cGa>cAa |
| A | c.785G>A     | c.(784-786)cGa>cAa   |
| T | c.469C>T     | c.(469-471)Ccc>Tcc   |
| A |              |                      |
| A | c.1996C>T    | c.(1996-1998)Ctg>Ttg |
| C | c.2984A>G    | c.(2983-2985)tAt>tGt |
| A | c.4761C>T    | c.(4759-4761)tcC>tcT |
| T | c.7683G>A    | c.(7681-7683)agG>agA |
| T |              |                      |
| T | c.137G>A     | c.(136-138)cGc>cAc   |
| A | c.984C>T     | c.(982-984)ttC>ttT   |
| T | c.2000C>T    | c.(1999-2001)cCc>cTc |
| A | c.1642C>T    | c.(1642-1644)Ccc>Tcc |
| T | c.390C>T     | c.(388-390)ccC>ccT   |
| T | c.809G>A     | c.(808-810)gGa>gAa   |
| T | c.1263C>T    | c.(1261-1263)atC>atT |
| T | c.2796G>A    | c.(2794-2796)tgG>tgA |

|   |               |                      |
|---|---------------|----------------------|
| T | c.168C>T      | c.(166-168)ctC>ctT   |
| A | c.1686C>T     | c.(1684-1686)ccC>ccT |
| T | c.1763C>T     | c.(1762-1764)tCg>tTg |
| A | c.34C>T       | c.(34-36)Cca>Tca     |
| T |               |                      |
| A | c.299G>A      | c.(298-300)gGg>gAg   |
| T | c.616G>A      | c.(616-618)Ggc>Agc   |
| A | c.55G>A       | c.(55-57)Gat>Aat     |
| A | c.1725G>A     | c.(1723-1725)ctG>ctA |
| T | c.343C>T      | c.(343-345)Ccc>Tcc   |
| T | c.1757G>A     | c.(1756-1758)gGc>gAc |
| T | c.1179G>A     | c.(1177-1179)acG>acA |
| A | c.1448C>T     | c.(1447-1449)tCc>tTc |
| A | c.383C>T      | c.(382-384)cCt>cTt   |
| T | c.5239G>A     | c.(5239-5241)Gat>Aat |
| A | c.3325C>T     | c.(3325-3327)Ccc>Tcc |
| A | c.84C>T       |                      |
| T | c.1023G>A     | c.(1021-1023)agG>agA |
| A | c.1663G>A     | c.(1663-1665)Gac>Aac |
| A | c.142G>A      | c.(142-144)Gag>Aag   |
| T | c.421G>A      | c.(421-423)Gga>Aga   |
| T | c.923C>T      | c.(922-924)cCa>cTa   |
| T | c.1921_splice | c.e7-1               |
| T | c.32G>A       | c.(31-33)aGg>aAg     |
| A | c.276G>A      | c.(274-276)agG>agA   |
| A | c.1764G>A     | c.(1762-1764)ctG>ctA |
| A | c.2404G>A     | c.(2404-2406)Gag>Aag |
| T | c.2278C>T     | c.(2278-2280)Cgg>Tgg |
| A | c.382C>T      | c.(382-384)Cca>Tca   |
| T | c.445G>A      | c.(445-447)Gag>Aag   |
| T | c.1138C>T     | c.(1138-1140)Ccg>Tcg |
| A |               |                      |
| T | c.1489C>T     | c.(1489-1491)Cct>Tct |
| A | c.1294C>T     | c.(1294-1296)Cat>Tat |
| T | c.1493G>A     | c.(1492-1494)cGa>cAa |
| A | c.822G>A      | c.(820-822)cgG>cgA   |
| A | c.1207C>T     | c.(1207-1209)Ctg>Ttg |
| A | c.762C>T      | c.(760-762)ccC>ccT   |
| T |               |                      |
| T |               |                      |
| T | c.27C>T       | c.(25-27)gcC>gcT     |
| A | c.1334G>A     | c.(1333-1335)aGg>aAg |
| T | c.1767C>T     | c.(1765-1767)ctC>ctT |

|   |           |                      |
|---|-----------|----------------------|
| T | c.924C>T  | c.(922-924)atC>atT   |
| A | c.72C>T   | c.(70-72)ctC>ctT     |
| A | c.568G>A  | c.(568-570)Ggc>Agc   |
| A | c.1699G>A | c.(1699-1701)Gaa>Aaa |
| A |           |                      |
| A | c.1094C>T | c.(1093-1095)cCg>cTg |
| A | c.1607C>T | c.(1606-1608)cCc>cTc |
| A | c.657G>A  | c.(655-657)gaG>gaA   |
| A | c.1306C>T | c.(1306-1308)Cgc>Tgc |
| T | c.963C>T  | c.(961-963)ttC>ttT   |
| A | c.2178C>T | c.(2176-2178)ttC>ttT |
| T | c.2483G>A | c.(2482-2484)cGa>cAa |
| A | c.205G>A  | c.(205-207)Gaa>Aaa   |
| T | c.6503C>T | c.(6502-6504)cCc>cTc |
| A | c.508C>T  | c.(508-510)Cgc>Tgc   |
| A | c.538G>A  | c.(538-540)Ggc>Agc   |
| T | c.931G>A  | c.(931-933)Ggg>Agg   |
| T | c.399C>T  | c.(397-399)atC>atT   |
| T | c.936C>T  | c.(934-936)aaC>aaT   |
| A | c.49G>A   | c.(49-51)Gat>Aat     |
| T | c.825G>A  | c.(823-825)atG>atA   |
| A | c.2913C>T | c.(2911-2913)ccC>ccT |
| A | c.7091C>T | c.(7090-7092)cCc>cTc |
| A | c.1196C>T | c.(1195-1197)tCc>tTc |
| A | c.931C>T  | c.(931-933)Cgt>Tgt   |
| A | c.502C>T  | c.(502-504)Cag>Tag   |
| A | c.1685C>T | c.(1684-1686)cCc>cTc |
| T |           |                      |
| T |           |                      |
| A | c.1512C>T | c.(1510-1512)acC>acT |
| T | c.85C>T   | c.(85-87)Cct>Tct     |
| T | c.244C>T  | c.(244-246)Ctt>Ttt   |
| A | c.335C>T  | c.(334-336)cCc>cTc   |
| T | c.1007C>T | c.(1006-1008)tCc>tTc |
| T | c.2247C>T | c.(2245-2247)ttC>ttT |
| A | c.1810C>T | c.(1810-1812)Ccc>Tcc |
| T | c.1000G>A | c.(1000-1002)Gaa>Aaa |
| T | c.670C>T  | c.(670-672)Cag>Tag   |
| A | c.276G>A  | c.(274-276)gaG>gaA   |
| T | c.474C>T  | c.(472-474)atC>atT   |
| A | c.101G>A  | c.(100-102)gGa>gAa   |
| T |           |                      |
| A | c.977A>T  | c.(976-978)gAc>gTc   |



|   |               |                      |
|---|---------------|----------------------|
| T | c.2434C>T     | c.(2434-2436)Cct>Tct |
| T | c.782C>T      | c.(781-783)cCc>cTc   |
| T |               |                      |
| G | c.158A>G      | c.(157-159)aAc>aGc   |
| A | c.1063G>A     | c.(1063-1065)Gaa>Aaa |
| A |               |                      |
| T | c.1714C>T     | c.(1714-1716)Caa>Taa |
| A | c.1102G>A     | c.(1102-1104)Gag>Aag |
| T | c.882C>T      | c.(880-882)atC>atT   |
| T | c.1125G>A     | c.(1123-1125)ggG>ggA |
| T | c.1056C>T     | c.(1054-1056)atC>atT |
| T | c.1339C>T     | c.(1339-1341)Ccc>Tcc |
| T | c.2193C>T     | c.(2191-2193)atC>atT |
| A | c.700C>T      | c.(700-702)Ccc>Tcc   |
| T | c.612G>A      | c.(610-612)gaG>gaA   |
| A | c.3044C>T     | c.(3043-3045)cCa>cTa |
| T | c.820G>A      | c.(820-822)Gag>Aag   |
| T | c.3704C>T     | c.(3703-3705)tCc>tTc |
| T | c.666C>T      | c.(664-666)tcC>tcT   |
| C | c.220C>G      | c.(220-222)Caa>Gaa   |
| A | c.642C>T      | c.(640-642)gtC>gtT   |
| A | c.807C>T      | c.(805-807)gtC>gtT   |
| A | c.1184G>A     | c.(1183-1185)gGa>gAa |
| A | c.160G>A      | c.(160-162)Ggc>Agc   |
| T | c.3239G>A     | c.(3238-3240)gGa>gAa |
| C |               |                      |
| T | c.1413G>A     | c.(1411-1413)aaG>aaA |
| T | c.375G>A      | c.(373-375)ctG>ctA   |
| A | c.508C>T      | c.(508-510)Ccc>Tcc   |
| A | c.1414G>A     | c.(1414-1416)Gga>Aga |
| A | c.1762C>T     | c.(1762-1764)Cga>Tga |
| A | c.824G>A      | c.(823-825)gGa>gAa   |
| A | c.153C>T      | c.(151-153)ttC>ttT   |
| A | c.2362G>A     | c.(2362-2364)Gaa>Aaa |
| A | c.-139_splice | c.e2-1               |
| G | c.2388G>C     | c.(2386-2388)caG>caC |
| T | c.1350C>T     | c.(1348-1350)ttC>ttT |
| C | c.1223A>G     | c.(1222-1224)aAc>aGc |
| A | c.241C>T      | c.(241-243)Cgg>Tgg   |
| T | c.800C>T      | c.(799-801)tCc>tTc   |
| A | c.5726C>T     | c.(5725-5727)tCc>tTc |
| A | c.2330C>T     | c.(2329-2331)cCc>cTc |
| T | c.394G>A      | c.(394-396)Gga>Aga   |

|   |              |                        |
|---|--------------|------------------------|
| A | c.1242G>A    | c.(1240-1242)ccG>ccA   |
| A | c.106G>A     | c.(106-108)Gag>Aag     |
| T | c.529C>T     | c.(529-531)Ctg>Ttg     |
| T | c.509G>A     | c.(508-510)cGa>cAa     |
| A | c.1993G>A    | c.(1993-1995)Gat>Aat   |
| T | c.707G>A     | c.(706-708)tGg>tAg     |
| A | c.2322C>T    | c.(2320-2322)tcC>tcT   |
| T | c.5687C>T    | c.(5686-5688)tCc>tTc   |
| A | c.-29_splice | c.e3-1                 |
| A | c.730G>A     | c.(730-732)Gaa>Aaa     |
| A | c.62C>T      | c.(61-63)tCc>tTc       |
| A | c.297C>T     | c.(295-297)tcC>tcT     |
| A | c.571C>T     | c.(571-573)Ccc>Tcc     |
| A | c.648G>A     | c.(646-648)agG>agA     |
| A | c.76C>T      | c.(76-78)Ccc>Tcc       |
| A | c.231G>A     | c.(229-231)tGg>tGgA    |
| A | c.40690C>T   | c.(40690-40692)Cgt>Tgt |
| T | c.436G>T     | c.(436-438)Gac>Tac     |
| A | c.2019C>T    | c.(2017-2019)ggC>ggT   |
| T | c.3061G>A    | c.(3061-3063)Gaa>Aaa   |
| T | c.445C>T     | c.(445-447)Cgc>Tgc     |
| T | c.1522C>T    | c.(1522-1524)Cga>Tga   |
| A | c.4276G>A    | c.(4276-4278)Gga>Aga   |
| A |              |                        |
| A | c.1606C>T    | c.(1606-1608)Ccc>Tcc   |
| T |              |                        |
| T | c.1351C>T    | c.(1351-1353)Cga>Tga   |
| A | c.921G>A     | c.(919-921)caG>caA     |
| A | c.2220C>T    | c.(2218-2220)tcC>tcT   |
| T | c.3884G>A    | c.(3883-3885)gGa>gAa   |
| A | c.1590G>A    | c.(1588-1590)acG>acA   |
| A | c.593C>T     | c.(592-594)cCc>cTc     |
| T | c.1699C>T    | c.(1699-1701)Ctc>Ttc   |
| A | c.8404C>T    | c.(8404-8406)Cat>Tat   |
| A | c.33918C>T   |                        |
| T | c.3025G>A    | c.(3025-3027)Gac>Aac   |
| A | c.4705G>A    | c.(4705-4707)Gga>Aga   |
| A | c.392C>T     | c.(391-393)cCc>cTc     |
| T | c.22G>A      | c.(22-24)Gtg>Atg       |
| C |              |                        |
| T | c.928C>T     | c.(928-930)Ccg>Tcg     |
| A | c.761C>T     | c.(760-762)tCg>tTg     |
| T |              |                        |

|   |           |                      |
|---|-----------|----------------------|
| T | c.672C>T  | c.(670-672)atC>atT   |
| T | c.407C>T  | c.(406-408)tCc>tTc   |
| A | c.90C>T   | c.(88-90)atC>atT     |
| T | c.9881C>T | c.(9880-9882)cCt>cTt |
| A | c.58G>A   | c.(58-60)Gac>Aac     |
| T | c.205C>T  | c.(205-207)Ctc>Ttc   |
| T | c.1041G>A | c.(1039-1041)atG>atA |
| T | c.473G>A  | c.(472-474)aGg>aAg   |
| T | c.3144G>A | c.(3142-3144)atG>atA |
| G | c.909A>G  | c.(907-909)ttA>ttG   |
| T | c.772G>A  | c.(772-774)Gaa>Aaa   |
| T | c.2140G>A | c.(2140-2142)Gaa>Aaa |
| T | c.587G>A  | c.(586-588)aGa>aAa   |
| A | c.1330C>T | c.(1330-1332)Ccc>Tcc |
| A | c.225C>T  | c.(223-225)tcC>tcT   |
| A | c.3484C>T | c.(3484-3486)Ctg>Ttg |
| A | c.2913C>T | c.(2911-2913)atC>atT |
| A | c.6330C>T | c.(6328-6330)gaC>gaT |
| T | c.2727C>T | c.(2725-2727)ttC>ttT |
| C | c.2655A>G |                      |
| A |           |                      |
| T | c.600G>A  | c.(598-600)gaG>gaA   |
| A | c.576C>T  | c.(574-576)ctC>ctT   |
| T | c.652G>A  | c.(652-654)Gag>Aag   |
| T | c.7782C>T | c.(7780-7782)ttC>ttT |
| T | c.1033C>T | c.(1033-1035)Cgt>Tgt |
| A | c.2549C>T | c.(2548-2550)cCg>cTg |
| T |           |                      |
| A | c.83C>T   | c.(82-84)cCc>cTc     |
| T | c.831G>A  | c.(829-831)atG>atA   |
| A | c.1398C>T | c.(1396-1398)ctC>ctT |
| A | c.163G>A  | c.(163-165)Gga>Aga   |
| T | c.261C>T  | c.(259-261)ttC>ttT   |
| A | c.1133C>T | c.(1132-1134)gCc>gTc |
| T | c.447C>T  | c.(445-447)tcC>tcT   |
| A | c.570G>A  | c.(568-570)acG>acA   |
| A | c.2458C>T | c.(2458-2460)Cat>Tat |
| T | c.1159G>A | c.(1159-1161)Gag>Aag |
| A | c.73G>A   | c.(73-75)Gga>Aga     |
| C | c.1068A>C | c.(1066-1068)gcA>gcC |
| T | c.2591G>A | c.(2590-2592)aGa>aAa |
| T | c.872G>A  | c.(871-873)aGg>aAg   |
| T | c.356C>T  | c.(355-357)cCt>cTt   |

|   |               |                        |
|---|---------------|------------------------|
| T | c.1252C>T     | c.(1252-1254)Caa>Taa   |
| T | c.117A>T      | c.(115-117)ggA>ggT     |
| T | c.5860G>A     | c.(5860-5862)Gat>Aat   |
| G | c.330A>C      | c.(328-330)caA>caC     |
| C | c.1147C>G     | c.(1147-1149)Cca>Gca   |
| T | c.452C>T      | c.(451-453)cCa>cTa     |
| T | c.1299C>T     | c.(1297-1299)tgC>tgT   |
| T | c.772G>A      | c.(772-774)Gga>Aga     |
| T | c.1240C>T     | c.(1240-1242)Cct>Tct   |
| T |               |                        |
| C | c.3568T>G     | c.(3568-3570)Ttt>Gtt   |
| T |               |                        |
| T | c.1208G>A     | c.(1207-1209)gGa>gAa   |
| A | c.1123G>A     | c.(1123-1125)Gag>Aag   |
| T | c.422C>T      | c.(421-423)tCa>tTa     |
| T | c.5809G>A     | c.(5809-5811)Gct>Act   |
| A | c.2169C>T     | c.(2167-2169)ctC>ctT   |
| A | c.4157_splice | c.e25-1                |
| A | c.2288C>T     | c.(2287-2289)tCc>tTc   |
| A | c.2181C>T     | c.(2179-2181)ggC>ggT   |
| T | c.1387C>T     | c.(1387-1389)Ccg>Tcg   |
| A | c.446C>T      | c.(445-447)aCg>aTg     |
| T | c.1756G>A     | c.(1756-1758)Ggc>Agc   |
| A | c.654G>A      | c.(652-654)aaG>aaA     |
| T | c.763G>A      | c.(763-765)Gaa>Aaa     |
| A | c.901C>T      | c.(901-903)Ctg>Ttg     |
| C | c.545T>G      | c.(544-546)aTt>aGt     |
| A | c.2086C>T     | c.(2086-2088)Cag>Tag   |
| T | c.4980C>T     | c.(4978-4980)tcC>tcT   |
| C | c.872T>C      | c.(871-873)cTt>cCt     |
| T | c.1104C>T     | c.(1102-1104)ccC>ccT   |
| A | c.580C>T      | c.(580-582)Cgt>Tgt     |
| A | c.1671C>T     | c.(1669-1671)ttC>ttT   |
| T | c.1543C>T     | c.(1543-1545)Ctt>Ttt   |
| A | c.-29_splice  | c.e3-1                 |
| T | c.204G>A      | c.(202-204)aaG>aaA     |
| T | c.1237G>A     | c.(1237-1239)Gtg>Atg   |
| T | c.1600G>A     | c.(1600-1602)Gag>Aag   |
| C |               |                        |
| T | c.12569C>T    | c.(12568-12570)tCc>tTc |
| T | c.5943C>T     | c.(5941-5943)ttC>ttT   |
| T | c.794C>T      | c.(793-795)tCt>tTt     |
| A | c.759C>T      | c.(757-759)ttC>ttT     |

|   |               |                        |
|---|---------------|------------------------|
| A | c.477_splice  | c.e5+1                 |
| C | c.398A>G      | c.(397-399)aAg>aGg     |
| T | c.241G>A      | c.(241-243)Ggt>Agt     |
| T |               |                        |
| T | c.510G>A      | c.(508-510)gtG>gtA     |
| T | c.2178G>A     | c.(2176-2178)atG>atA   |
| A | c.634C>T      | c.(634-636)Ccg>Tcg     |
| T | c.973G>A      | c.(973-975)Gag>Aag     |
| A | c.5351G>A     | c.(5350-5352)gGa>gAa   |
| A | c.2123G>A     | c.(2122-2124)aGa>aAa   |
| A | c.163G>A      | c.(163-165)Gag>Aag     |
| A | c.1069G>A     | c.(1069-1071)Gat>Aat   |
| A | c.1795G>A     | c.(1795-1797)Gaa>Aaa   |
| T | c.142C>T      | c.(142-144)Cca>Tca     |
| A | c.638C>T      | c.(637-639)gCc>gTc     |
| T |               |                        |
| A | c.3240C>T     | c.(3238-3240)atC>atT   |
| A | c.284C>T      | c.(283-285)tCt>tTt     |
| A | c.1183C>T     | c.(1183-1185)Ccc>Tcc   |
| A |               |                        |
| T |               |                        |
| T | c.1032C>T     | c.(1030-1032)aaC>aaT   |
| T | c.693C>T      | c.(691-693)tcC>tcT     |
| T | c.2059C>T     | c.(2059-2061)Cat>Tat   |
| T | c.226T>A      | c.(226-228)Tct>Act     |
| T | c.2671C>T     | c.(2671-2673)Ccc>Tcc   |
| T | c.2244C>T     | c.(2242-2244)atC>atT   |
| T |               |                        |
| T | c.1305_splice | c.e11+1                |
| A | c.8203_splice | c.e53+1                |
| T | c.12346G>A    | c.(12346-12348)Gat>Aat |
| T | c.162G>A      | c.(160-162)gaG>gaA     |
| A | c.572G>A      | c.(571-573)gGa>gAa     |
| T | c.1460C>T     | c.(1459-1461)cCt>cTt   |
| A | c.660G>A      | c.(658-660)aaG>aaA     |
| T | c.932C>T      | c.(931-933)gCt>gTt     |
| A | c.413C>T      | c.(412-414)tCc>tTc     |
| T | c.103C>T      | c.(103-105)Ccg>Tcg     |
| T | c.2746C>T     | c.(2746-2748)Cgc>Tgc   |
| A | c.2684C>T     | c.(2683-2685)cCc>cTc   |
| T | c.638C>T      | c.(637-639)tCc>tTc     |
| C |               |                        |
| A | c.636G>A      | c.(634-636)atG>atA     |

|      |                    |                         |
|------|--------------------|-------------------------|
| T    | c.4615G>A          | c.(4615-4617)Gag>Aag    |
| C    | c.509T>C           | c.(508-510)tTa>tCa      |
| T    | c.996C>T           | c.(994-996)tcC>tcT      |
| A    | c.3665C>T          | c.(3664-3666)tCa>tTa    |
| C    |                    |                         |
| A    | c.281G>A           | c.(280-282)gGg>gAg      |
| T    | c.3083G>A          | c.(3082-3084)gGa>gAa    |
| A    | c.2495G>A          | c.(2494-2496)gGa>gAa    |
| A    | c.461C>T           | c.(460-462)cCc>cTc      |
| A    | c.8061G>A          | c.(8059-8061)ttG>ttA    |
| A    | c.121C>T           | c.(121-123)Cca>Tca      |
| T    | c.4069G>A          | c.(4069-4071)Ggt>Agt    |
| A    | c.295G>A           | c.(295-297)Gat>Aat      |
| A    | c.1653C>T          | c.(1651-1653)tcC>tcT    |
| A    | c.1015G>A          | c.(1015-1017)Gaa>Aaa    |
| T    | c.2176C>T          | c.(2176-2178)Cct>Tct    |
| T    |                    |                         |
| A    | c.1014G>A          | c.(1012-1014)gaG>gaA    |
| A    | c.642C>T           | c.(640-642)gcC>gcT      |
| C    | c.288G>C           | c.(286-288)cgG>cgC      |
| T    | c.262G>A           | c.(262-264)Gat>Aat      |
| T    | c.283C>T           | c.(283-285)Cct>Tct      |
| A    |                    |                         |
| C    |                    |                         |
| T    |                    |                         |
| T    | c.1065C>T          | c.(1063-1065)tcC>tcT    |
| G    | c.12758G>C         | c.(12757-12759)gGa>gCa  |
| A    |                    |                         |
| A    | c.6408G>A          | c.(6406-6408)atG>atA    |
| A    |                    |                         |
| T    | c.151_splice       | c.e2-1                  |
| A    | c.604C>T           | c.(604-606)Cgg>Tgg      |
| A    | c.1687G>A          | c.(1687-1689)Gaa>Aaa    |
| T    | c.71C>T            | c.(70-72)cCa>cTa        |
| A    | c.8392G>A          | c.(8392-8394)Gat>Aat    |
| A    | c.44C>T            | c.(43-45)gCc>gTc        |
| AAGT | c.3870_3871insACTT | c.(3868-3873)cttcatfs   |
| -    | c.118_119delCC     | c.(118-120)cccf         |
| -    | c.6506_6508delAGA  | c.(6505-6510)aagatc>atc |
| A    | c.1055C>T          | c.(1054-1056)tCg>tTg    |
| T    | c.2260C>T          | c.(2260-2262)Cct>Tct    |
| A    | c.2190C>T          | c.(2188-2190)acC>acT    |
| A    |                    |                         |

|   |                |                      |
|---|----------------|----------------------|
| A | c.1410C>T      | c.(1408-1410)gaC>gaT |
| A | c.649C>T       | c.(649-651)Cgt>Tgt   |
| A | c.2903C>T      | c.(2902-2904)tCg>tTg |
| A | c.699G>A       | c.(697-699)agG>agA   |
| A |                |                      |
| T | c.1910G>A      | c.(1909-1911)cGa>cAa |
| T | c.1015_splice  | c.e8+1               |
| T | c.791C>T       | c.(790-792)tCc>tTc   |
| A | c.4204C>T      | c.(4204-4206)Cct>Tct |
| T | c.12A>T        | c.(10-12)gaA>gaT     |
| T | c.1717C>T      | c.(1717-1719)Ctt>Ttt |
| A | c.147C>T       | c.(145-147)ttC>ttT   |
| T | c.1314G>A      | c.(1312-1314)ggG>ggA |
| T | c.34711_splice | c.e179+1             |
| T | c.465G>A       | c.(463-465)atG>atA   |
| G | c.230G>C       | c.(229-231)cGa>cCa   |
| T |                |                      |
| T | c.430G>A       | c.(430-432)Gcg>Acg   |
| A | c.808G>A       | c.(808-810)Gat>Aat   |
| T |                |                      |
| T |                |                      |
| T | c.3970G>A      | c.(3970-3972)Gag>Aag |
| T | c.1323C>T      | c.(1321-1323)ttC>ttT |
| T | c.574G>T       | c.(574-576)Gga>Tga   |
| T | c.369G>A       | c.(367-369)acG>acA   |
| T | c.308C>T       | c.(307-309)cCt>cTt   |
| T |                |                      |
| T | c.1495C>T      | c.(1495-1497)Cgc>Tgc |
| A | c.19C>A        | c.(19-21)Cac>Aac     |
| A | c.1122G>A      | c.(1120-1122)acG>acA |
| T | c.2965C>T      | c.(2965-2967)Cga>Tga |
| T | c.54G>A        | c.(52-54)ctG>ctA     |
| A | c.589G>A       | c.(589-591)Gaa>Aaa   |
| T | c.2786_splice  | c.e17-1              |
| T | c.106C>T       | c.(106-108)Cag>Tag   |
| C | c.182A>G       | c.(181-183)cAa>cGa   |
| A | c.2315C>T      | c.(2314-2316)cCt>cTt |
| C |                |                      |
| T | c.7G>A         | c.(7-9)Gac>Aac       |
| A | c.927C>T       | c.(925-927)gtC>gtT   |
| A | c.1621C>T      | c.(1621-1623)Cgc>Tgc |
| T | c.513C>T       | c.(511-513)ttC>ttT   |
| T | c.2100G>A      | c.(2098-2100)agG>agA |

|   |               |                        |
|---|---------------|------------------------|
| A | c.1251C>A     | c.(1249-1251)ttC>ttA   |
| T | c.2409C>T     | c.(2407-2409)tcC>tcT   |
| G | c.736A>G      | c.(736-738)Atg>Gtg     |
| A |               |                        |
| T | c.296G>A      | c.(295-297)gGa>gAa     |
| A | c.310C>T      | c.(310-312)Ccg>Tcg     |
| A | c.369C>T      | c.(367-369)tcC>tcT     |
| A | c.1775G>A     | c.(1774-1776)aGg>aAg   |
| A |               |                        |
| T |               |                        |
| A | c.399T>A      | c.(397-399)aaT>aaA     |
| T | c.163G>A      |                        |
| C | c.3180_splice | c.e25+1                |
| T | c.868C>A      | c.(868-870)Cag>Aag     |
| T | c.3152C>T     | c.(3151-3153)tCc>tTc   |
| A | c.3576G>A     | c.(3574-3576)ccG>ccA   |
| A | c.1168G>A     | c.(1168-1170)Gat>Aat   |
| T | c.1444C>T     | c.(1444-1446)Cgg>Tgg   |
| A | c.1696_splice | c.e18-1                |
| A | c.53G>A       | c.(52-54)aGg>aAg       |
| A | c.86G>A       | c.(85-87)gGa>gAa       |
| A | c.14098C>T    | c.(14098-14100)Cct>Tct |
| T | c.1004G>T     | c.(1003-1005)tGg>tTg   |
| T |               |                        |
| A | c.809C>T      | c.(808-810)tCa>tTa     |
| T | c.2633C>T     | c.(2632-2634)cCc>cTc   |
| T | c.2408C>T     | c.(2407-2409)cCt>cTt   |
| A | c.1884_splice | c.e10-1                |
| A | c.2244G>A     | c.(2242-2244)ggG>ggA   |
| T | c.96G>A       | c.(94-96)gtG>gtA       |
| T | c.2075G>A     | c.(2074-2076)tGg>tAg   |
| T | c.1114G>A     | c.(1114-1116)Gaa>Aaa   |
| T | c.1720G>A     | c.(1720-1722)Gat>Aat   |
| T |               |                        |
| A | c.3478G>A     | c.(3478-3480)Gag>Aag   |
| T |               |                        |
| C | c.661A>C      | c.(661-663)Aac>Cac     |
| T | c.177G>A      | c.(175-177)cgG>cgA     |
| A | c.3465G>A     | c.(3463-3465)tgG>tgA   |
| A | c.2781G>A     | c.(2779-2781)caG>caA   |
| T | c.77C>T       | c.(76-78)cCa>cTa       |
| T | c.270G>A      | c.(268-270)atG>atA     |
| T | c.195C>T      | c.(193-195)ttC>ttT     |



|   |              |                      |
|---|--------------|----------------------|
| T | c.429G>A     | c.(427-429)ctG>ctA   |
| A | c.701C>T     | c.(700-702)cCa>cTa   |
| A |              |                      |
| T | c.99G>A      | c.(97-99)ctG>ctA     |
| C | c.88A>C      | c.(88-90)Agc>Cgc     |
| T | c.2450G>A    | c.(2449-2451)cGc>cAc |
| T | c.57G>A      | c.(55-57)atG>atA     |
| T | c.481C>T     | c.(481-483)Cac>Tac   |
| A | c.2158C>T    | c.(2158-2160)Cca>Tca |
| A | c.1774G>A    | c.(1774-1776)Ggt>Agt |
| T | c.563C>T     | c.(562-564)gCc>gTc   |
| T | c.3620G>A    | c.(3619-3621)gGa>gAa |
| A | c.149C>T     | c.(148-150)tCt>tTt   |
| A | c.770G>A     | c.(769-771)tGg>tAg   |
| A | c.1789C>T    | c.(1789-1791)Cgc>Tgc |
| T | c.1157C>T    | c.(1156-1158)tCc>tTc |
| G | c.373_splice | c.e5-1               |
| T |              |                      |
| T | c.2769C>T    | c.(2767-2769)ttC>ttT |
| T | c.399C>T     | c.(397-399)atC>atT   |
| T | c.477C>T     | c.(475-477)ttC>ttT   |
| T | c.1656G>A    | c.(1654-1656)atG>atA |
| A | c.9G>T       | c.(7-9)caG>caT       |
| T | c.333G>A     | c.(331-333)ggG>ggA   |
| A |              |                      |
| T | c.186T>A     | c.(184-186)ccT>ccA   |
| A | c.1177C>T    | c.(1177-1179)Cct>Tct |
| T | c.2090G>A    | c.(2089-2091)gGa>gAa |
| A | c.260_splice | c.e4-1               |
| A | c.187G>A     | c.(187-189)Gtt>Att   |
| T | c.2030G>A    |                      |
| A | c.580C>T     | c.(580-582)Cct>Tct   |
| T |              |                      |
| A | c.2470C>T    | c.(2470-2472)Ctg>Ttg |
| T | c.352C>T     | c.(352-354)Cgg>Tgg   |
| C | c.6620A>G    | c.(6619-6621)cAa>cGa |
| T | c.2390G>A    | c.(2389-2391)cGt>cAt |
| C | c.118A>G     | c.(118-120)Aga>Gga   |
| T | c.287_splice | c.e3-1               |
| T | c.819G>A     | c.(817-819)aaG>aaA   |
| A | c.716C>T     | c.(715-717)tCa>tTa   |
| A | c.814G>A     | c.(814-816)Gaa>Aaa   |
| T | c.1000C>T    | c.(1000-1002)Cct>Tct |

|   |               |                        |
|---|---------------|------------------------|
| T | c.49G>A       | c.(49-51)Gca>Aca       |
| T | c.128G>A      |                        |
| T | c.910A>T      | c.(910-912)Aag>Tag     |
| T | c.291G>A      | c.(289-291)atG>atA     |
| A | c.40_splice   | c.e1+1                 |
| A | c.459C>T      | c.(457-459)ttC>ttT     |
| T | c.1180C>T     | c.(1180-1182)Cag>Tag   |
| A |               |                        |
| T |               |                        |
| T | c.1900G>A     | c.(1900-1902)Gag>Aag   |
| A | c.555G>A      | c.(553-555)ccG>ccA     |
| T | c.281C>T      | c.(280-282)tCc>tTc     |
| T | c.3951C>T     | c.(3949-3951)atC>atT   |
| A | c.191G>T      | c.(190-192)gGa>gTa     |
| T | c.60C>T       | c.(58-60)gtC>gtT       |
| T |               |                        |
| A | c.3663G>A     | c.(3661-3663)cgG>cgA   |
| A | c.1596C>T     | c.(1594-1596)ttC>ttT   |
| T | c.650C>T      | c.(649-651)cCc>cTc     |
| T | c.833G>A      | c.(832-834)aGa>aAa     |
| T |               |                        |
| T | c.1125C>T     | c.(1123-1125)agC>agT   |
| T | c.445G>A      | c.(445-447)Gag>Aag     |
| A | c.2416_splice | c.e15-1                |
| A | c.252C>T      | c.(250-252)tcC>tcT     |
| T | c.647G>A      | c.(646-648)cGa>cAa     |
| A | c.1628C>T     | c.(1627-1629)tCc>tTc   |
| A | c.1998C>T     | c.(1996-1998)gcC>gcT   |
| A | c.2266G>A     | c.(2266-2268)Gtg>Atg   |
| T | c.136G>A      | c.(136-138)Gaa>Aaa     |
| T | c.2468G>A     | c.(2467-2469)gGa>gAa   |
| T | c.56806G>A    | c.(56806-56808)Gaa>Aaa |
| T | c.2377C>T     | c.(2377-2379)Ctg>Ttg   |
| A | c.653C>T      | c.(652-654)tCc>tTc     |
| T | c.2160G>A     | c.(2158-2160)caG>caA   |
| A |               |                        |
| C | c.3833A>G     | c.(3832-3834)cAt>cGt   |
| A | c.1012G>A     | c.(1012-1014)Gaa>Aaa   |
| A | c.831C>T      | c.(829-831)atC>atT     |
| C | c.1355A>G     | c.(1354-1356)aAa>aGa   |
| T | c.938C>T      | c.(937-939)cCt>cTt     |
| T | c.1092C>T     | c.(1090-1092)atC>atT   |
| T | c.1266C>T     | c.(1264-1266)gtC>gtT   |

|   |              |                        |
|---|--------------|------------------------|
| T | c.10803C>T   | c.(10801-10803)gcC>gcT |
| A | c.588C>T     | c.(586-588)tcC>tcT     |
| T | c.783C>T     | c.(781-783)atC>atT     |
| G | c.1656G>C    | c.(1654-1656)agG>agC   |
| T |              |                        |
| T | c.738G>A     | c.(736-738)ggG>ggA     |
| A |              |                        |
| T | c.1023C>T    | c.(1021-1023)ttC>ttT   |
| A | c.342C>T     | c.(340-342)ctC>ctT     |
| T | c.790G>A     | c.(790-792)Gca>Aca     |
| T |              |                        |
| G | c.126T>C     | c.(124-126)taT>taC     |
| G | c.307T>C     | c.(307-309)Ttt>Ctt     |
| T | c.761C>T     | c.(760-762)tCa>tTa     |
| T | c.782_splice | c.e11-1                |
| A | c.385C>T     | c.(385-387)Cga>Tga     |
| A | c.253G>A     | c.(253-255)Gat>Aat     |
| T | c.2078G>A    | c.(2077-2079)gGa>gAa   |
| T | c.625G>A     | c.(625-627)Gag>Aag     |
| T | c.465G>A     | c.(463-465)cgG>cgA     |
| G | c.598T>C     | c.(598-600)Tat>Cat     |
| A |              |                        |
| C | c.1195C>G    | c.(1195-1197)Cga>Gga   |
| T | c.1288G>A    | c.(1288-1290)Gag>Aag   |
| A |              |                        |
| T | c.260G>A     | c.(259-261)gGa>gAa     |
| A | c.7276C>T    |                        |
| T | c.1673C>T    | c.(1672-1674)cCa>cTa   |
| A |              |                        |
| A | c.323G>A     | c.(322-324)cGa>cAa     |
| A | c.2348G>A    | c.(2347-2349)gGa>gAa   |
| A | c.501C>T     | c.(499-501)atC>atT     |
| T | c.2796G>A    | c.(2794-2796)ctG>ctA   |
| T | c.2317C>T    | c.(2317-2319)Cct>Tct   |
| A | c.2193C>T    | c.(2191-2193)atC>atT   |
| C | c.131A>G     | c.(130-132)gAa>gGa     |
| A | c.3010G>A    | c.(3010-3012)Gga>Aga   |
| T |              |                        |
| T |              |                        |
| T | c.2288C>T    | c.(2287-2289)cCt>cTt   |
| A | c.-34_splice | c.e2-1                 |
| T | c.2463C>A    | c.(2461-2463)gtC>gtA   |
| C | c.971A>G     | c.(970-972)aAt>aGt     |

|   |           |                      |
|---|-----------|----------------------|
| A | c.2284C>T | c.(2284-2286)Cac>Tac |
| A | c.1253C>T | c.(1252-1254)cCt>cTt |
| T | c.453C>T  | c.(451-453)ccC>ccT   |
| T | c.718C>T  | c.(718-720)Ccg>Tcg   |
| T | c.1443C>T | c.(1441-1443)tcC>tcT |
| G | c.137C>G  | c.(136-138)cCa>cGa   |
| A | c.9G>A    | c.(7-9)acG>acA       |
| T |           |                      |
| T |           |                      |
| G | c.1373G>C | c.(1372-1374)gGt>gCt |
| A |           |                      |
| G | c.516T>C  | c.(514-516)ttT>ttC   |
| A | c.1253G>A | c.(1252-1254)aGa>aAa |
| A | c.741C>T  | c.(739-741)atC>atT   |
| T | c.1410C>T | c.(1408-1410)gtC>gtT |
| T | c.594G>A  | c.(592-594)agG>agA   |
| A | c.1066G>A | c.(1066-1068)Gat>Aat |
| A | c.760C>T  | c.(760-762)Ccc>Tcc   |
| A |           |                      |
| A | c.4362C>T | c.(4360-4362)ccC>ccT |
| A | c.1429C>T | c.(1429-1431)Ctg>Ttg |
| T |           |                      |
| T | c.497A>T  | c.(496-498)gAa>gTa   |
| T | c.1513C>T | c.(1513-1515)Cga>Tga |
| T | c.637C>T  | c.(637-639)Cca>Tca   |
| T | c.3922C>T | c.(3922-3924)Cgg>Tgg |
| A |           |                      |
| A | c.5111C>T | c.(5110-5112)tCg>tTg |
| T | c.1397C>T | c.(1396-1398)cCc>cTc |
| T | c.477G>A  |                      |
| T | c.2138G>A | c.(2137-2139)gGc>gAc |
| T | c.4207C>T | c.(4207-4209)Cta>Tta |
| T | c.355C>T  | c.(355-357)Cct>Tct   |
| A | c.1627G>A | c.(1627-1629)Ggc>Agc |
| T | c.775C>T  | c.(775-777)Ctg>Ttg   |
| T | c.354C>T  | c.(352-354)ttC>ttT   |
| A | c.203G>A  | c.(202-204)tGg>tAg   |
| T | c.229C>T  | c.(229-231)Ccc>Tcc   |
| A | c.515G>T  | c.(514-516)gGa>gTa   |
| A | c.674G>A  | c.(673-675)gGa>gAa   |
| A | c.2248G>A | c.(2248-2250)Gga>Aga |
| G | c.32T>C   | c.(31-33)cTa>cCa     |
| A | c.1042G>A | c.(1042-1044)Gaa>Aaa |

|   |              |                      |
|---|--------------|----------------------|
| A |              |                      |
| T | c.1179C>T    | c.(1177-1179)ctC>ctT |
| T | c.464G>A     | c.(463-465)cGg>cAg   |
| T | c.1151C>T    | c.(1150-1152)cCa>cTa |
| T | c.90C>T      | c.(88-90)ttC>ttT     |
| G | c.724A>G     | c.(724-726)Aaa>Gaa   |
| T | c.4846G>A    | c.(4846-4848)Gaa>Aaa |
| A | c.306G>A     | c.(304-306)ccG>ccA   |
| A | c.187G>A     |                      |
| A | c.704_splice | c.e7+1               |
| T | c.1492G>A    | c.(1492-1494)Gaa>Aaa |
| A | c.-78_splice | c.e3-1               |
| T | c.4369C>T    | c.(4369-4371)Caa>Taa |
| T | c.914G>A     | c.(913-915)gGa>gAa   |
| T | c.167G>A     | c.(166-168)cGa>cAa   |
| G | c.195A>C     | c.(193-195)gaA>gaC   |
| G |              |                      |
| T |              |                      |
| A | c.582C>T     | c.(580-582)ccC>ccT   |
| T | c.48G>A      | c.(46-48)ctG>ctA     |
| A | c.1076C>T    | c.(1075-1077)tCa>tTa |
| C |              |                      |
| T | c.214G>A     | c.(214-216)Gac>Aac   |
| G | c.4910A>C    | c.(4909-4911)aAt>aCt |
| A | c.2358C>T    | c.(2356-2358)atC>atT |
| T | c.685C>T     | c.(685-687)Cgg>Tgg   |
| A | c.1395C>T    | c.(1393-1395)gcC>gcT |
| T | c.2388A>T    | c.(2386-2388)aaA>aaT |
| T | c.1672C>T    | c.(1672-1674)Cca>Tca |
| T | c.308C>T     | c.(307-309)tCc>tTc   |
| T |              |                      |
| T | c.624G>A     | c.(622-624)aaG>aaA   |
| T | c.2453C>T    | c.(2452-2454)aCg>aTg |
| A | c.881C>T     | c.(880-882)cCa>cTa   |
| A | c.1105G>A    | c.(1105-1107)Ggc>Agc |
| A | c.2205C>T    | c.(2203-2205)acC>acT |
| A |              |                      |
| A | c.309C>T     | c.(307-309)ccC>ccT   |
| A | c.3536C>T    | c.(3535-3537)cCc>cTc |
| A | c.1628G>A    |                      |
| A | c.771C>T     | c.(769-771)ttC>ttT   |
| A |              |                      |
| T |              |                      |

|   |              |                        |
|---|--------------|------------------------|
| T |              |                        |
| A |              |                        |
| A | c.1996G>A    | c.(1996-1998)Gag>Aag   |
| G | c.9790T>C    | c.(9790-9792)Tat>Cat   |
| T | c.954C>T     | c.(952-954)atC>atT     |
| G |              |                        |
| T | c.351G>A     | c.(349-351)caG>caA     |
| A | c.557G>A     | c.(556-558)cGa>cAa     |
| T | c.3925C>T    | c.(3925-3927)Ctt>Ttt   |
| T |              |                        |
| A | c.926C>T     | c.(925-927)tCc>tTc     |
| A |              |                        |
| A |              |                        |
| A |              |                        |
| T |              |                        |
| T |              |                        |
| A |              |                        |
| A |              |                        |
| T | c.1110G>A    | c.(1108-1110)aaG>aaA   |
| T | c.781G>A     | c.(781-783)Gga>Aga     |
| T | c.550G>A     | c.(550-552)Gat>Aat     |
| A | c.221C>T     | c.(220-222)cCa>cTa     |
| G | c.781_splice | c.e4+1                 |
| T | c.11514G>A   | c.(11512-11514)gtG>gtA |
| T | c.6082G>A    | c.(6082-6084)Gtt>Att   |
| A | c.1956G>A    | c.(1954-1956)agG>agA   |
| A | c.1051G>A    | c.(1051-1053)Gaa>Aaa   |
| T |              |                        |
| A |              |                        |
| A | c.146G>T     | c.(145-147)gGa>gTa     |
| A | c.40C>T      | c.(40-42)Cct>Tct       |
| A | c.47G>A      | c.(46-48)gGa>gAa       |
| A | c.3721G>A    | c.(3721-3723)Gaa>Aaa   |
| C |              |                        |
| T | c.-60_splice | c.e1-1                 |
| G |              |                        |
| A | c.536C>T     | c.(535-537)tCc>tTc     |
| T |              |                        |
| A | c.415G>A     | c.(415-417)Gaa>Aaa     |
| T | c.259C>T     | c.(259-261)Ccg>Tcg     |
| T |              |                        |
| T | c.2332G>A    | c.(2332-2334)Gaa>Aaa   |
| T |              |                        |

|   |               |                      |
|---|---------------|----------------------|
| A | c.828G>A      | c.(826-828)aaG>aaA   |
| G | c.268A>G      | c.(268-270)Aaa>Gaa   |
| A | c.525C>T      | c.(523-525)tcC>tcT   |
| A | c.984C>T      | c.(982-984)ccC>ccT   |
| A | c.52G>A       | c.(52-54)Gag>Aag     |
| T | c.403C>T      | c.(403-405)Caa>Taa   |
| T | c.561G>A      | c.(559-561)agG>agA   |
| A | c.1476G>A     | c.(1474-1476)tcG>tcA |
| A |               |                      |
| T | c.956G>A      | c.(955-957)gGa>gAa   |
| T | c.1246G>A     | c.(1246-1248)Gaa>Aaa |
| A |               |                      |
| C | c.3563T>C     | c.(3562-3564)gTg>gCg |
| T | c.3722C>T     | c.(3721-3723)aCc>aTc |
| A | c.1088C>T     | c.(1087-1089)tCc>tTc |
| A | c.2048C>T     | c.(2047-2049)cCc>cTc |
| A | c.2569G>A     | c.(2569-2571)Gat>Aat |
| T | c.610C>T      | c.(610-612)Cgt>Tgt   |
| T | c.219G>A      | c.(217-219)aaG>aaA   |
| A | c.196C>T      | c.(196-198)Ccc>Tcc   |
| A | c.1483G>A     | c.(1483-1485)Gaa>Aaa |
| A | c.1904G>A     | c.(1903-1905)cGt>cAt |
| A |               |                      |
| C | c.194A>C      | c.(193-195)tAt>tCt   |
| T | c.573C>T      | c.(571-573)ttC>ttT   |
| T |               |                      |
| C | c.1575A>G     | c.(1573-1575)gaA>gaG |
| T | c.115G>T      | c.(115-117)Ggg>Tgg   |
| A | c.1150G>T     | c.(1150-1152)Gaa>Taa |
| T | c.2335C>T     | c.(2335-2337)Cct>Tct |
| A |               |                      |
| T | c.55G>A       | c.(55-57)Gac>Aac     |
| A | c.351G>A      | c.(349-351)aaG>aaA   |
| G | c.2487A>G     | c.(2485-2487)agA>agG |
| A |               |                      |
| T |               |                      |
| A | c.3268_splice | c.e49-1              |
| A |               |                      |
| T | c.109C>T      | c.(109-111)Cca>Tca   |
| A | c.1609_splice | c.e13+1              |
| T |               |                      |
| A | c.231C>T      | c.(229-231)aaC>aaT   |
| A | c.239G>A      | c.(238-240)cGa>cAa   |

|   |            |                        |
|---|------------|------------------------|
| T | c.45C>A    | c.(43-45)ttC>ttA       |
| A | c.2396C>T  | c.(2395-2397)aCc>aTc   |
| A | c.12088G>A | c.(12088-12090)Gag>Aag |
| A |            |                        |
| T |            |                        |
| A | c.3381C>T  | c.(3379-3381)ttC>ttT   |
| T | c.399G>A   | c.(397-399)tcG>tcA     |
| T | c.1792G>A  | c.(1792-1794)Ggc>Agc   |
| G | c.470T>G   | c.(469-471)gTt>gGt     |
| A | c.937C>T   | c.(937-939)Cct>Tct     |
| A | c.4738G>A  | c.(4738-4740)Gga>Aga   |
| C |            |                        |
| G | c.1500A>C  | c.(1498-1500)gcA>gcC   |
| T | c.6337G>A  | c.(6337-6339)Gaa>Aaa   |
| A | c.818A>T   | c.(817-819)gAc>gTc     |
| A | c.261G>A   | c.(259-261)gaG>gaA     |
| A |            |                        |
| T | c.401C>T   | c.(400-402)tCg>tTg     |
| T | c.224G>A   | c.(223-225)cGg>cAg     |
| A |            |                        |
| A | c.7978C>T  | c.(7978-7980)Cac>Tac   |
| A | c.175C>T   | c.(175-177)Cat>Tat     |
| A | c.1520T>A  | c.(1519-1521)gTg>gAg   |
| T | c.799C>T   | c.(799-801)Cct>Tct     |
| A | c.765G>A   | c.(763-765)tgG>tgA     |
| C | c.344A>G   | c.(343-345)aAg>aGg     |
| A |            |                        |
| T | c.2687G>A  | c.(2686-2688)gGg>gAg   |
| A | c.5216C>T  | c.(5215-5217)tCg>tTg   |
| A | c.2272C>T  | c.(2272-2274)Cct>Tct   |
| T |            |                        |
| A | c.1792C>T  | c.(1792-1794)Cgt>Tgt   |
| C | c.2069T>C  | c.(2068-2070)tTa>tCa   |
| A | c.1891G>A  | c.(1891-1893)Gat>Aat   |
| A | c.451C>T   | c.(451-453)Ccc>Tcc     |
| A | c.850C>T   | c.(850-852)Ccc>Tcc     |
| A | c.248G>A   | c.(247-249)cGg>cAg     |
| A | c.891G>A   | c.(889-891)atG>atA     |
| A | c.9G>T     | c.(7-9)aaG>aaT         |
| T | c.526G>A   | c.(526-528)Gga>Aga     |
| T | c.1566C>T  | c.(1564-1566)ttC>ttT   |
| A | c.1219C>T  | c.(1219-1221)Cgg>Tgg   |
| A |            |                        |



|   |              |                      |
|---|--------------|----------------------|
| A |              |                      |
| T | c.497C>T     | c.(496-498)tCc>tTc   |
| A | c.118C>T     | c.(118-120)Cgt>Tgt   |
| A | c.644C>T     | c.(643-645)tCt>tTt   |
| A | c.2855G>A    | c.(2854-2856)gGa>gAa |
| T |              |                      |
| T | c.2210C>T    | c.(2209-2211)cCc>cTc |
| A | c.1645G>A    | c.(1645-1647)Ggg>Agg |
| C | c.4358G>C    | c.(4357-4359)cGg>cCg |
| G | c.210A>G     | c.(208-210)tcA>tcG   |
| T | c.809G>A     | c.(808-810)cGc>cAc   |
| T | c.4005C>T    | c.(4003-4005)gaC>gaT |
| T | c.339C>T     | c.(337-339)ttC>ttT   |
| T | c.3G>A       | c.(1-3)atG>atA       |
| T | c.1384C>T    | c.(1384-1386)Caa>Taa |
| A | c.2311G>A    | c.(2311-2313)Gag>Aag |
| T | c.243G>A     | c.(241-243)atG>atA   |
| A | c.333G>A     | c.(331-333)ggG>ggA   |
| T | c.1667G>A    | c.(1666-1668)gGa>gAa |
| A | c.2301G>A    | c.(2299-2301)ggG>ggA |
| T | c.889C>T     | c.(889-891)Cag>Tag   |
| T | c.1442C>T    | c.(1441-1443)tCc>tTc |
| A | c.199G>A     | c.(199-201)Gat>Aat   |
| C |              |                      |
| T | c.452C>T     | c.(451-453)cCc>cTc   |
| A | c.466G>A     | c.(466-468)Ggc>Agc   |
| T | c.2535C>T    | c.(2533-2535)atC>atT |
| A | c.1395G>A    | c.(1393-1395)agG>agA |
| T | c.95G>A      | c.(94-96)gGt>gAt     |
| A | c.6311C>T    | c.(6310-6312)gCt>gTt |
| A | c.107C>T     | c.(106-108)tCc>tTc   |
| G | c.425A>G     | c.(424-426)aAt>aGt   |
| T | c.1890G>A    | c.(1888-1890)agG>agA |
| A | c.1488C>T    | c.(1486-1488)tcC>tcT |
| T | c.1021C>T    | c.(1021-1023)Cgt>Tgt |
| T | c.-60_splice | c.e1-1               |
| A |              |                      |
| A | c.1125C>T    | c.(1123-1125)atC>atT |
| A | c.121G>A     | c.(121-123)Gaa>Aaa   |
| T | c.222C>T     | c.(220-222)ccC>ccT   |
| G |              |                      |
| A | c.509G>A     | c.(508-510)tGa>tAa   |
| C | c.1097T>C    | c.(1096-1098)tTt>tCt |

|     |                 |                       |
|-----|-----------------|-----------------------|
| A   | c.5297C>T       |                       |
| A   | c.578G>A        | c.(577-579)cGa>cAa    |
| T   | c.387C>T        | c.(385-387)atC>atT    |
| A   | c.2127G>A       | c.(2125-2127)gtG>gtA  |
| T   | c.2221G>A       | c.(2221-2223)Gag>Aag  |
| A   | c.510G>A        | c.(508-510)agG>agA    |
| T   | c.96T>A         | c.(94-96)tgT>tgA      |
| A   | c.285C>T        | c.(283-285)ttC>ttT    |
| A   | c.363C>T        | c.(361-363)ctC>ctT    |
| GGG | c.476_477insGGG | c.(475-477)ctg>ctGGGg |
| C   | c.83T>G         | c.(82-84)cTg>cGg      |
| G   | c.65T>C         | c.(64-66)tTt>tCt      |
| T   | c.2765G>A       | c.(2764-2766)cGc>cAc  |
| A   | c.67C>T         | c.(67-69)Cgg>Tgg      |
| A   |                 |                       |
| T   | c.688C>T        | c.(688-690)Cct>Tct    |
| T   | c.2992A>T       | c.(2992-2994)Aca>Tca  |
| A   | c.552C>T        | c.(550-552)tgC>tgT    |
| A   | c.1186C>T       | c.(1186-1188)Cgg>Tgg  |
| A   | c.1356C>A       | c.(1354-1356)tcC>tcA  |
| A   |                 |                       |
| G   | c.6229A>G       | c.(6229-6231)Aca>Gca  |
| T   | c.1052C>T       |                       |
| T   | c.2522G>A       | c.(2521-2523)aGc>aAc  |
| A   | c.1435G>A       | c.(1435-1437)Gtg>Atg  |
| A   | c.590C>T        | c.(589-591)tCc>tTc    |
| A   | c.1158C>T       | c.(1156-1158)tgC>tgT  |
| A   | c.352C>T        | c.(352-354)Cgg>Tgg    |
| T   | c.2870C>T       | c.(2869-2871)aCg>aTg  |
| C   |                 |                       |
| C   | c.2435A>G       | c.(2434-2436)cAg>cGg  |
| A   | c.3060C>T       | c.(3058-3060)ccC>ccT  |
| A   | c.323C>T        | c.(322-324)tCg>tTg    |
| C   |                 |                       |
| A   | c.1903C>T       | c.(1903-1905)Cgg>Tgg  |
| T   | c.2362C>T       | c.(2362-2364)Cgc>Tgc  |
| T   | c.305G>A        | c.(304-306)gGc>gAc    |
| C   | c.70A>G         | c.(70-72)Agc>Ggc      |
| T   | c.1688C>T       | c.(1687-1689)gCg>gTg  |
| G   | c.1295A>G       | c.(1294-1296)aAt>aGt  |
| T   |                 |                       |
| A   | c.158G>A        | c.(157-159)cGc>cAc    |
| C   | c.14T>C         | c.(13-15)cTg>cCg      |

|   |              |                      |
|---|--------------|----------------------|
| C | c.658_splice | c.e4-1               |
| T |              |                      |
| A | c.930G>A     | c.(928-930)gcG>gcA   |
| T | c.870G>T     |                      |
| T | c.3736C>T    | c.(3736-3738)Cgg>Tgg |
| G | c.11A>C      | c.(10-12)cAc>cCc     |
| A | c.1204G>A    | c.(1204-1206)Gca>Aca |
| C | c.804C>G     | c.(802-804)caC>caG   |
| G |              |                      |
| C | c.292A>G     | c.(292-294)Agt>Ggt   |
| A | c.830G>A     | c.(829-831)cGg>cAg   |
| C | c.397_splice | c.e3+2               |
| T | c.3233C>T    | c.(3232-3234)gCc>gTc |
| A | c.459G>T     | c.(457-459)ttG>ttT   |
| A |              |                      |
| A | c.2271G>T    | c.(2269-2271)agG>agT |
| A | c.612G>A     | c.(610-612)caG>caA   |
| T | c.316G>A     | c.(316-318)Gtg>Atg   |
| C | c.301T>C     | c.(301-303)Tat>Cat   |
| A |              |                      |
| A | c.1108T>A    |                      |
| G |              |                      |
| T | c.6598G>A    |                      |
| C |              |                      |
| T | c.492G>A     |                      |
| T |              |                      |
| A | c.2246G>A    | c.(2245-2247)tGc>tAc |
| T | c.555G>A     | c.(553-555)ctG>ctA   |
| T | c.146C>T     | c.(145-147)cCc>cTc   |
| G | c.12G>C      | c.(10-12)caG>caC     |
| T | c.393C>T     | c.(391-393)aaC>aaT   |
| T |              |                      |
| A | c.1041C>T    | c.(1039-1041)tgC>tgT |
| T | c.1502G>T    | c.(1501-1503)gGa>gTa |
| C | c.38T>C      |                      |
| A | c.2317G>A    | c.(2317-2319)Gga>Aga |
| T | c.202G>A     | c.(202-204)Gag>Aag   |
| G |              |                      |
| T | c.1525C>T    | c.(1525-1527)Cat>Tat |
| T | c.7634G>A    | c.(7633-7635)gGc>gAc |
| A | c.518G>A     | c.(517-519)aGt>aAt   |
| T | c.586G>A     | c.(586-588)Gct>Act   |
| G |              |                      |

|   |               |                       |
|---|---------------|-----------------------|
| T | c.1119C>T     |                       |
| A |               |                       |
| T | c.2053_splice | c.e5+1                |
| C | c.132A>G      | c.(130-132)ggA>ggG    |
| T | c.409G>A      | c.(409-411)Gaa>Aaa    |
| G | c.1085A>G     |                       |
| T | c.666C>A      | c.(664-666)gcC>gcA    |
| C | c.2263G>C     | c.(2263-2265)Gtg>Ctg  |
| A | c.942C>T      | c.(940-942)ctC>ctT    |
| C | c.981C>G      | c.(979-981)ctC>ctG    |
| T | c.391G>T      | c.(391-393)Gga>Tga    |
| A | c.322C>T      | c.(322-324)Cgt>Tgt    |
| T | c.2423G>A     | c.(2422-2424)tGg>tAg  |
| C | c.1767T>C     | c.(1765-1767)gaT>gaC  |
| A | c.763C>T      | c.(763-765)Ctg>Ttg    |
| G | c.609_splice  | c.e5-1                |
| C | c.436_splice  | c.e3+1                |
| A | c.1494C>A     | c.(1492-1494)ccC>ccA  |
| T | c.676G>A      | c.(676-678)Gct>Act    |
| A | c.675C>T      | c.(673-675)ctC>ctT    |
| A | c.822_splice  | c.e7-1                |
| G | c.661G>C      | c.(661-663)Gaa>Caa    |
| G | c.137T>C      | c.(136-138)gTc>gCc    |
| A | c.393C>T      | c.(391-393)ctC>ctT    |
| T | c.413T>A      | c.(412-414)aTa>aAa    |
| C | c.1919G>C     | c.(1918-1920)tGg>tCg  |
| C |               |                       |
| T | c.187G>A      | c.(187-189)Gat>Aat    |
| T |               |                       |
| T | c.1791C>T     | c.(1789-1791)ggC>ggT  |
| T | c.1693C>T     | c.(1693-1695)Cgg>Tgg  |
| C | c.2186T>G     | c.(2185-2187)tTt>tGt  |
| A |               |                       |
| G |               |                       |
| A | c.1233G>T     | c.(1231-1233)ttG>ttT  |
| C | c.1680G>C     | c.(1678-1680)atG>atC  |
| A | c.396G>T      | c.(394-396)ctG>ctT    |
| G | c.1176G>C     | c.(1174-1176)ccG>ccC  |
| C |               |                       |
| T | c.1241G>A     | c.(1240-1242)cGc>cAc  |
| T | c.975C>T      | c.(973-975)acC>acT    |
| T | c.2424G>A     | c.(2422-2424)tGg>tGgA |
| A | c.164G>T      | c.(163-165)cGc>cTc    |

T

c.348G>T

c.(346-348)gtG>gtT

---

---

**Protein Change**

---

p.N191fs  
p.Q2115del  
p.E715del  
p.704\_705insA  
p.I388\_splice  
p.L660L  
p.G261R  
p.W3000\*  
p.R34Q  
p.I1239I  
p.P1233S  
p.L152L  
p.V1662V  
p.G21\_splice  
p.F1055L  
p.R373Q  
p.G315D  
p.R371R  
p.R341R  
p.E423E  
  
p.W492\*  
p.S275F  
p.G321D  
p.R80Q  
  
p.R604H  
p.A1173A  
  
p.E203K  
p.P175L  
p.S605F  
p.L60L  
p.R44\*  
  
p.A704V  
p.F362F  
p.E1084E

p.E34K  
p.P14L  
p.E1090K  
p.V340I  
p.T513T  
p.P754Q  
p.A553V  
p.E484D  
p.S135F

p.E19E  
p.P116S  
p.R26R

p.I201I  
p.D357N  
p.E22K  
p.T1374A  
p.L268L  
p.G585E  
p.A100T  
p.P208P  
p.T96T

p.I368F

p.G676R

p.A1255T

p.A404V  
p.R369I

p.E1043K  
p.S505F  
p.R1943R  
p.D340N  
p.Q216K  
p.R100R  
p.T973T  
p.G85R

p.D368E  
p.V600E  
p.D934N  
p.E75K  
p.S199F  
p.W247\*  
p.W3000\*  
p.G38E  
p.R2194\*  
p.L759L  
p.R734H  
p.G248E  
p.P282P

p.I822I  
p.V1109V  
p.R7951M  
p.L491L

p.E59\*  
p.K83K  
p.S216F  
p.T376T  
p.S218F

p.G943E  
p.S533S  
p.S218S  
p.L435L  
p.S569F  
p.P44S  
p.W105\*  
p.R207H  
p.S1306A  
p.G103R  
p.E96K  
p.E11587K  
p.E50E  
p.G709G  
p.W940L



p.S2300P  
p.Q319K  
p.G136E

p.D153N  
p.Q1819K  
p.Q1429\*  
p.R273\*  
p.A150A  
p.V3579V  
p.A257A  
p.G413D

p.S112F  
p.R219C  
p.Q521K  
p.E111K  
p.G3330R  
p.F181F  
p.P333L  
p.S591L  
p.V759V  
p.P287S

p.P810P  
p.K91K  
p.P281P  
p.S630F  
p.D754N

p.P1258P  
p.E998\*  
p.F428F  
p.R411H

p.V123V  
p.A71T

p.F197F

p.G585R  
p.P550S

p.R323W  
p.F63F  
p.P685P  
p.V651A  
p.V333V  
p.G402E  
p.T1204M  
p.R175C  
p.R405Q  
p.K198\_splice  
p.L166fs  
p.R432fs  
p.V1098fs  
p.R116fs  
p.P114fs  
p.I466fs  
p.F323fs  
p.F200fs  
p.F201fs  
p.A256fs  
p.E269fs  
p.Y144fs  
p.L36fs  
p.G97fs  
p.R192K  
p.R280K  
p.F70F  
  
p.V37V  
p.N171D  
p.P990S  
p.R938\*  
p.R235W  
p.S21F  
p.F211F  
p.L212L  
p.F336F  
p.S158F  
p.H189Y  
p.E17\*  
p.N1323S  
p.K134N  
p.G255G

p.G1087G  
p.W185\*  
p.S1853L  
p.D122N  
p.F3F  
p.G245E  
p.Q2167Q  
p.G608E  
p.L291F  
p.R229K

p.G70E  
p.S1573L  
p.A2110V  
p.S77F  
p.P288L  
p.G20R  
p.E176K  
p.S264L  
p.F169F  
p.D285N  
p.P165S  
p.R11R  
p.P288S  
p.G341R  
p.E1245K

p.P33S  
p.D72N  
p.G169S  
p.I213I  
p.S209F  
p.G14E  
p.E861K  
p.E250E  
p.L2753I

p.G276S  
p.E42E  
p.F2337F

p.S6S  
p.P263P  
p.I670I  
p.E636K  
p.D1461N  
p.L264L

p.G135E  
p.P49L  
p.P191S  
p.I7731I  
p.R90K  
p.R286C  
p.S508P  
p.V319E  
p.E3002E  
p.L669L  
p.S110C  
p.K24I  
p.S42S  
p.A3A  
p.I115I  
p.R490Q

p.K565K  
p.E404K  
p.G420R  
p.S1895S  
p.E535K

p.R342R  
p.E3149K  
p.P759S  
p.D1139N  
p.L143L  
p.Q358\*  
p.A56T  
p.H147Y  
p.K116K  
p.P991L  
p.F1578I  
p.E233K

p.E1926K

p.P1653A

p.L92F

p.E657K

p.G46A

p.W98\*

p.I175I

p.R228K

p.V570V

p.K126K

p.G3232G

p.\*356\*

p.F561F

p.S102F

p.E68K

p.Q425\*

p.G1134E

p.S1008F

p.L469L

p.A685D

p.R2511R

p.P180S

p.G549E

p.R304K

p.R83\_splice

p.R210Q

p.V194V

p.S277S

p.E346E

p.G602E

p.G423E

p.H731Y

p.A171\_splice

p.E71K

p.L198F

p.R891R

p.S84F

p.E2086K

p.P207S  
p.P25593L  
p.K493K  
p.D55N

p.A964A  
p.M392I  
p.S105S  
p.L107L  
p.P816P  
p.R103R

p.L832\_splice  
p.K2327K  
p.S881F  
p.K1329K  
p.P30H  
p.N475Y  
p.P22S  
p.P1119L  
p.P544L  
p.D1754\_splice  
p.K216K  
p.E318K

p.Q948\*  
p.G50E  
p.L1022L  
p.A216V  
p.E20659K  
p.P292S  
p.S669F  
p.E254K  
p.W586\*  
p.R69R  
p.L343L  
p.G233D  
p.S803F  
p.S1074F

p.V60E  
p.R179Q  
p.P1023S  
p.P406L  
p.E102K  
p.R108C  
p.F701F  
p.L4413S

p.S133L

p.S424S  
p.D878N  
p.L686L  
p.L367L

p.E971K  
p.P89S  
p.K190K

p.S149F  
p.P25593S

p.P390L  
p.P132L  
p.G10E  
p.G335\_splice  
p.E2125K  
p.L883L

p.M157L

p.S504F  
p.R1291Q  
p.E756K  
p.S336F  
p.R203Q  
p.S117S  
p.L78L  
p.I86I  
p.L228L  
p.L637L  
p.S164S

p.Q357Q  
p.K548K  
p.I374V  
p.D158N  
p.S382S  
p.P309S  
p.E1907E  
p.H1790Y  
p.S115F  
p.G3106R  
p.S267F  
p.D118N  
p.E341K  
p.G62\*  
p.P831S  
p.I133I  
p.S557S  
p.H9Y  
p.P738L  
p.E1986\*  
p.K77E  
p.F1026F  
p.G116R  
p.R2562C  
p.D864N  
p.D371N

p.P57S  
p.A33V

p.P411P  
p.E163K  
p.G266E  
p.I330I  
p.S139F

p.L213L  
p.E267K  
p.S222F  
p.R263W  
p.T3I  
p.L375I



p.P447\_splice

p.K276K

p.L92L

p.L193L

p.E73K

p.F111F

p.P467L

p.S45F

p.D369D

p.H329Q

p.M142I

p.H516Y

p.R130Q

p.W294\*

p.R474R

p.S50L

p.N294Y

p.P125Q

p.P263L

p.G227S

p.L289L

p.S502F

p.G349R

p.G334G

p.G237E

p.S513S

p.V956V

p.S100F

p.S732S

p.L123L

p.E158K

p.E248K

p.G388S

p.S554S

p.L13L

p.S170S

p.D477D

p.G404G  
p.I2007M  
p.R227R

p.S523L  
p.P412P  
p.R345C  
p.P148S  
p.R65Q  
p.P429S  
p.E366K  
p.Q4376Q  
p.T433I  
p.G390D  
p.S218F

p.E621K  
p.F136F  
p.R221R  
p.G349E  
p.S1237\_splice  
p.A644A  
p.V262I  
p.D1289D  
p.P819L  
p.K23Q  
p.R20\*  
p.P816S  
p.L116L

p.N1104Y  
p.F245F  
p.P545S  
p.L1254L  
p.E54K

p.L362H  
p.E885K  
p.L244R  
p.S810S  
p.D802N  
p.E472K  
p.R3679C

p.R136R  
p.L513L  
p.E287\_splice  
p.T467S  
p.L110L  
p.T136T

p.I683I  
p.P338S  
p.S98S  
p.S138S  
p.S323S  
p.S473F  
p.K254R

p.P110S  
p.E532K  
p.S1865L  
p.P614S  
p.R248Q

p.L360L  
p.K255E  
p.P256L  
p.I293I  
p.L2032L

p.L313L  
p.E1645K  
p.T804T  
p.G4962R  
p.E380E  
p.D294N  
p.Q1404\*  
p.D518D  
p.G543G  
p.C66G  
p.E188K  
p.G47S  
p.A256V  
p.E558K

p.R738W  
p.E226E  
p.E77K  
p.I80I  
p.A3V  
p.S461F  
p.G1005G  
p.R578W

p.P238P  
p.A277T  
p.E43E

p.W120\*  
p.R590C  
p.L478F  
p.P622S  
p.E104D  
p.E421E  
p.E1486K  
p.P84S  
p.R291Q

p.E302K  
p.K157I  
p.E729K

p.S248Y  
p.E22K  
p.P245H  
p.R439R  
p.F188C

p.L185L

p.D264N

p.T548I  
p.R1340R

p.T3T

p.F91F  
p.G300G  
p.S647F  
p.S375F

p.D283N  
p.R412Q  
p.D641N  
p.P193S  
p.N266S  
p.G251G  
p.E163K

p.E1314K  
p.F28F  
p.V131V  
p.M360I  
p.K46K  
p.R421L  
p.A591V  
p.Q478\*  
p.S569F

p.W95\*  
p.G4082E  
p.E51K

p.G304S  
p.H233Y  
p.R1666R  
p.P572S  
p.K517Q  
p.G561R  
p.G130E

p.S745S  
p.L186L  
p.E777K  
p.R588Q  
p.E229E  
p.P325L  
p.V248V

p.S2516S

p.L92L

p.I376I

p.A98A

p.G90E

p.S63L

p.N905Y

p.S217F

p.L362L

p.F221L

p.K810K

p.V114\_splice

p.H285Y

p.K666Q

p.P1182S

p.I338I

p.S31S

p.P469S

p.D390N

p.A240A

p.R300C

p.V654V

p.M352I

p.F197F

p.P153L

p.E34K

p.P480S

p.M38I

p.E461K

p.L826F

p.V1155V

p.S404S

p.I187I

p.L65L

p.E551K  
p.S191L

p.Q1719\*

p.I279I  
p.P55S

p.T1796T

p.P2171L  
p.A591A  
p.T177T  
p.V12118M  
p.E332K  
p.V351A  
p.C466S  
p.S1039F

p.S652F  
p.N219K  
p.S236F  
p.Q1090Q  
p.S76F  
p.S179F  
p.E107K  
p.P625S  
p.S451F  
p.G124A

p.S380S

p.R929R

p.T61T  
p.S843L  
p.S314S

p.S35S

p.E147\_splice

p.S1544N

p.E279K

p.G396R

p.D36N

p.R122K

p.G738G

p.P1538L

p.H217N

p.L82F

p.G145R

p.F889F

p.R168C

p.G1626G

p.F247I

p.I61I

p.E225\*

p.R242W

p.G323R

p.P326S

p.S263F

p.A541A

p.S1448F

p.S143F

p.E917K

p.D627N

p.E228K

p.E899E

p.Q52\_splice

p.S263F

p.E207E

p.P1938P

p.S1342L

p.P153L



p.T739I  
p.F308F  
p.G881W  
p.Q250Q  
p.S230P  
p.I104I  
p.S562S  
p.S808S  
p.R30\*  
p.D36N

p.L398L  
p.P302S  
p.A1689A  
p.R194Q  
p.T467T  
p.S372F  
p.K83K

p.G446G  
p.P2953P  
p.Q51Q  
p.F921F  
p.S715S  
p.E187K  
p.R28K  
p.G2616E  
p.E372K  
p.P284S  
p.S909S  
p.F237F  
p.E38K  
p.R50C  
p.V240A  
p.S160L  
p.G615G  
p.G2778R  
p.L1314F

p.R314C  
p.S36S

p.K30E

p.R1088W

p.I109I

p.S427L

p.P181S

p.A753A

p.D817N

p.L181L

p.E91K

p.P432L

p.E2128K

p.S1776N

p.I212I

p.P115L

p.P403L

p.R111R

p.S207F

p.G252E

p.L733L

p.S147L

p.R234\*

p.E152K

p.G333\*

p.R1075Q

p.K812E

p.P823L

p.G70R

p.E946K

p.I52I

p.T302T

p.G115E

p.G228\*

p.R361K

p.R118H

p.R93R

p.R1143R

p.F276F

p.S520L

p.E42K

p.D344N

p.S252L

p.A206A

p.R666R

p.P1548S

p.R69M

p.G254G

p.S335F

p.S1208F

p.E23K

p.G296E

p.I216I

p.P199S

p.T414T

p.D475N

p.I49I

p.S412F

p.F297F

p.I37I

p.G445\_splice

p.E2747K

p.G618D

p.E358\_splice

p.H578N

p.D204Y

p.E323K

p.A101A

p.P301L

p.Q837\*

p.R397R

p.K1024K

p.T4790R

p.L608I

p.P56S  
p.P275L  
p.L244L

p.S108S  
p.P493P  
p.R2235R  
p.P455L  
p.G589G  
p.V108V  
p.R490R  
p.S484L  
p.G121R  
p.H393Y  
p.F835L  
p.P357S

p.P354L  
p.R59C  
p.I94I  
p.V287M  
p.E71K  
p.V363V  
p.F1224F  
p.R94C  
p.M233I  
p.F2664F  
p.R134R  
p.R869K  
p.A336\_splice

p.C223C  
p.S139S  
p.P144P  
p.P608L  
p.T822I

p.W586\*

p.G300V  
p.Q213\*  
p.E398K

p.P76L  
p.S553Y  
p.P430S  
p.D67N  
p.G3163E  
p.I444I  
p.Y519Y  
p.H174Y  
p.K64Q  
p.G1204R  
p.F175F  
p.D52Y  
p.R3354\*  
p.L648L  
p.E345\_splice

p.S159F

p.G496E  
p.A599V  
p.A77A  
p.L3541R  
p.T248I  
p.S258F  
p.P406S  
p.S863S  
p.D100N  
p.G394R  
p.V33V  
p.G164D  
p.P252L  
p.E388K  
p.P1345S  
p.D208N  
p.F1565F  
p.K10E  
p.F691F  
p.V1799V  
p.L1912P  
p.G103S  
p.P633P  
p.E50K  
p.E2K

p.P732S  
p.P432S  
p.P331S  
p.T429T  
p.R819Q  
p.E428K  
p.P116L

p.G801E

p.Q362Q  
p.G161G

p.L311L  
p.L367L  
p.S173G  
p.W7\*  
p.E50K  
p.A2328T

p.L152I  
p.L447L  
p.L1668L  
p.F168L  
p.E169K  
p.S2318F  
p.E610K  
p.F463F  
p.E1940K  
p.W510\*  
p.M348I  
p.G88E  
p.G2588G  
p.P829S  
p.L845R  
p.S179S  
p.R4081Q  
p.R617R  
p.L301L  
p.E765K  
p.S424F  
p.P1296S

p.E132K  
p.G53E  
p.S90F

p.T472I  
p.L3415L  
p.I346I  
p.Q430\*  
p.S466F  
p.E2069V  
p.R393C

p.V295M  
p.E86K  
p.G543R  
p.E1115K  
p.G79G  
p.P132L  
p.L87L

p.G242\_splice

p.P1107P  
p.S1534F  
p.R161Q  
p.D639N  
p.K789K  
p.R65R  
p.T467I  
p.K424N  
p.E49K  
p.S34S  
p.L15L  
p.L38H

p.H2330N  
p.I457I  
p.H587H  
p.A192T  
p.L77F  
p.K483K  
p.G66R  
p.V449V  
p.T363T  
p.E661K  
p.S1013S

p.G350E  
p.G704E  
p.S267S  
p.P451S  
p.E206G  
p.P708S  
p.S350S  
p.E4182K

p.Q1793Q

p.D81\_splice  
p.P596P

p.S628L  
p.D1793N  
p.G1022E  
p.S539F  
p.A156A  
p.D3932N  
p.S87F  
p.P209P  
p.L431L  
p.A272V

p.G1572E

p.L906L  
p.G878E  
p.V305A

p.P312P  
p.I21I  
p.T485M

p.P178P  
p.I254I  
p.L2799F  
p.E138K



p.S1073F  
p.P105L  
p.P17S  
p.R1668R  
p.A612V  
p.G314R  
p.S367L

p.R111R  
p.S425L  
p.R2537C  
p.S685F  
p.T470I

p.L655\_splice  
p.S958\*

p.P92S  
p.K191Q  
p.E241K  
p.V319M  
p.P589L  
p.G832G  
p.G171A  
p.E292\*  
p.S27F  
p.P370L  
p.Q156\*  
p.S189F

p.R745Q  
p.K209K  
p.E540E  
p.I198I

p.G449R  
p.R237W  
p.L1629L  
p.P456S  
p.V1279V  
p.I717I

p.P7S  
p.S1529F  
p.M3382I  
p.P245L

p.S133L  
p.P12L  
p.E333K  
p.S61L  
p.F19F  
p.P51S

p.T402I  
p.W1093\*  
p.G198R  
p.E133K  
p.F358F  
p.S777L  
p.R768C  
p.E342K  
p.R156Q  
p.S519F  
p.S379P  
p.G205E  
p.D187H  
p.G67G  
p.G304E  
p.P16L  
p.E1237K  
p.I150I  
p.D1658D  
p.R323R

p.E126K  
p.K22K  
p.E76K

p.K149K  
p.R209Q

p.I168S  
p.G267G  
p.I491I

p.D161N  
p.E172K  
p.R165C  
p.R1566W  
p.S75L

p.R474R  
p.R162R  
p.V34V  
p.G219E  
p.S242L  
p.F367F  
p.E391\_splice  
p.D2676Y  
p.H35Y  
p.P572L  
p.S205F  
p.A67A  
p.P177L  
p.P281S  
p.R534\_splice  
p.G385R  
p.T130T  
p.R981I  
p.P235P  
p.S500S  
p.P579L  
p.L33L  
p.S3611F  
p.R25W

p.E637K  
p.G422S  
p.D98N  
p.P983L  
p.F281Y  
p.G159E

p.Q283\*  
p.P1375P  
p.F398F  
p.G294G  
p.S296S

p.G99G  
p.G487G  
p.I108I  
p.W408\*  
p.E952K  
p.G182\_splice  
p.R62Q  
p.H3962N  
p.R118C  
p.P430S  
p.L683I

p.L771F  
p.R88C  
p.P463S

p.I400I  
p.E311D  
p.L548P  
p.E242K  
p.P319L  
p.S102S  
p.P268L  
p.R434W  
p.G1036R  
p.E35E

p.S500F  
p.L684L  
p.G368R  
p.Q513Q  
p.P906S

p.F407L  
p.P239S

p.E442K  
p.S140S  
p.I865I  
p.P291S

p.K678E  
p.F998F  
p.V743V  
p.P228S  
p.P468S  
p.T379I

p.A618V  
p.G53W  
p.G171S  
p.S53F

p.E1099Q  
p.V263V  
p.F1423F  
p.K479\*

p.P3S  
p.Q344\*  
p.G107S  
p.H19Y  
p.A143V  
p.E117K

p.S722F  
p.S460F  
p.G310E  
p.V1807I  
p.R394\*  
p.F476F  
p.T788S

p.G227\_splice  
p.E1041K  
p.G78V  
p.L569L  
p.A193V  
p.M1I  
p.E462K

p.K23I  
p.P109\_splice

p.H62Y  
p.P166L  
p.D307N  
p.S1567F  
p.L462F  
p.T584N  
p.G227E  
p.S2067\_splice  
p.R420Q

p.Q375\_splice  
p.P190L  
p.F185L

p.H358Y  
p.S123L  
p.Q1351\*  
p.P171S  
p.E388K

p.R554R  
p.P853S  
p.P83L  
p.I178I  
p.E179K

p.G250G  
p.P11L  
p.R839C  
p.P1286S  
p.A893A  
p.G406D  
p.P493L  
p.L394L  
p.S10L  
p.K380Q  
p.G187D  
p.W150R  
p.S477S  
p.G402S  
p.G749\_splice  
p.G294R

p.P1232P  
p.P1859P  
p.S475S  
p.S284S

p.P1152S  
p.I213M  
p.Q234H  
p.P338L

p.R7726R  
p.P536S  
p.I804\_splice  
p.A1115\_splice

p.P2216S  
p.L306L  
p.N282N  
p.P517P  
p.A264A  
p.H306Y  
p.E310K  
p.I300I  
p.D19N  
p.S159F  
p.L186L  
p.K857K  
p.H88Y  
p.A151A  
p.P286L  
p.Q26\*  
p.L464L  
p.E62K

p.I612I  
p.N150S  
p.S539T

p.E827K  
p.W189\*

p.K116K  
p.P252P  
p.P390S  
p.F180F  
p.L195F  
p.P2563P  
p.P52S

p.K342\*  
p.S142S  
p.G156E  
p.G33S  
p.R98K  
p.G154D

p.S247S  
p.A41A  
p.F100F  
p.V2033I  
p.R60K  
p.E1069K  
p.D715H  
p.L1170F  
p.R987R  
p.S1185S  
p.P153L  
p.E396K  
p.S625F  
p.P94S  
p.Q1259Q  
p.E3272K  
p.G2707R

p.S1623F

p.G7841G

p.P115L  
p.S1748L

p.L528H  
p.G46G



p.P228S  
p.L477L  
p.G631\_splice  
p.D449N  
p.P168S  
p.L1883F  
p.A437A  
p.Q151Q  
p.\*862\*  
p.D1183N  
p.P646S  
p.R90K  
p.G566A

p.S34S

p.P534S  
p.I382I  
p.A487T  
p.G476R  
p.S390L  
p.V160A

p.S1462N  
p.V103V  
p.G569S  
p.Q83\*  
p.R1787K  
p.S224F

p.R342K  
p.W261\*  
p.R100C  
p.G947S  
p.G137\_splice  
p.S69Y  
p.L38F  
p.P509S

p.G398R  
p.P840L  
p.S112S

p.R227R  
p.G51R  
p.R399Q  
p.G28G  
p.R1120W  
p.H512Y  
p.S1549F  
p.K200\*  
p.E740K  
p.N114N  
p.A99V  
p.F354F  
p.R1036\*  
p.F246F  
p.P280P  
p.W83\*  
p.Q251\_splice  
p.E651K

p.Q384Q  
p.E223K

p.T1083I  
p.R83\*

p.G199E  
p.Q101\*  
p.D2312N

p.A52A  
p.V471M

p.P486L  
p.R782K  
p.L93F  
p.P154S  
p.S134C

p.G238D

p.G147S  
p.E583K

p.S30F  
p.E120K  
p.N81T  
p.P543S

p.Y1291H  
p.R159Q  
p.I288I  
p.P572P

p.N307D  
p.Y148Y  
p.E432K  
p.L78F  
p.E105K

p.R89W  
p.S8F  
p.P621S

p.V220V

p.G498R  
p.S231F  
p.I300I  
p.C165C  
p.G279V

p.F141F

p.A75V  
p.G2438E  
p.P63L  
p.S115F

p.I932I  
p.R1269C  
p.R450C  
p.E739K  
p.R479R  
p.S248S  
p.P51L

p.L169L  
p.R2317\*  
p.I186I  
p.D431E  
p.D265N  
p.A642V

p.I937I  
p.G116R

p.A11A  
p.A124V  
p.E303K  
p.E1310K  
p.R355C  
p.Q311\*  
p.P730P  
p.R374Q  
p.S1301F  
p.R18R  
p.K535K  
p.P420S  
p.L380L  
p.G132E  
p.E2767\_splice  
p.A59D  
p.F1373F  
p.S336S  
p.I374I  
p.A318V  
p.P841L  
p.A3226A  
p.L215L  
p.I802I  
p.A413V

p.I339T  
p.R67R  
p.R31R

p.P63P  
p.S43A

p.A12T  
p.E501K  
p.D1461A  
p.R105C  
p.P440S  
p.P182L  
p.D748\_splice  
p.V1123V  
p.P239S  
p.Q78\*  
p.T216T  
p.D2303N  
p.G193G  
p.G404E  
p.G48G  
p.D318N  
p.L149L  
p.L494Q  
p.P222L  
p.N60H  
p.P148S  
p.F71F  
p.L189L  
p.A831A  
p.L275F  
p.E923K  
p.T650T  
p.S1073S  
p.P712P  
p.M93I  
p.R1216C  
p.S409F  
p.R283C

p.N67K  
p.H1380Y  
p.P473S  
p.R268Q  
p.P264S  
p.G534D  
p.R159R  
p.S803F

p.R1143K  
p.S1719F  
p.F163C  
p.E264K  
p.E107K  
p.I18I  
p.L847L  
p.S531F  
p.R341Q  
p.G109D  
p.R55H  
p.I2446I  
p.G463E  
p.G143R  
p.S260N  
p.R288K  
p.K945K  
p.S392S

p.H817Y

p.V456V  
p.A324A  
p.K140K  
p.P6S

p.P267L  
p.S694S  
p.G857R  
p.G362\_splice  
p.E136\*  
p.A346A  
p.A214A

p.A111A  
p.K535N  
p.L96L

p.S255S  
p.A261T  
p.T770T  
p.F170F

p.R154Q

p.V1687V

p.K1203K

p.F450F

p.V157V

p.R432H

p.I479I

p.K2949K

p.R228G

p.S96F

p.F1677F

p.E99K

p.P35L

p.L252L

p.S452P

p.R94W

p.G21840R

p.E140K

p.P1415L

p.A2897A

p.S298L

p.S902L

p.E96\*

p.P527L

p.S56F

p.R3460K

p.V100A

p.Q741\*

p.S105S

p.L64R

p.F1267F

p.G69G

p.G444G

p.Q257\*

p.E329\*

p.F104F

p.R464K

p.S108F  
p.N382S  
p.P8S  
p.S297F  
p.R668Q  
p.S2088F  
p.E181E  
p.L1456L  
p.F856F  
p.P74S  
p.P138S  
p.S495L  
p.S169S  
p.E545V  
p.T163I

p.R485W  
p.R65Q

p.R208Q  
p.S675F

p.S312N

p.L110L

p.E932E  
p.G144S

p.F33F  
p.R382C  
p.P39L  
p.E286K

p.L219V

p.Q1831Q  
p.A5077A

p.R1302Q  
p.S448F



p.K398K  
p.S97F  
p.T7I  
p.I1754I  
p.R179Q  
p.L1162L  
p.I162I

p.D390D  
p.E764K  
p.E183K  
p.G245E  
p.D344E  
p.G78R  
p.R176Q  
p.E3832K  
p.T189T  
p.R215\*  
p.S399S  
p.E131K  
p.F879F  
p.H18Y  
p.L933L  
p.G33E

p.E532K

p.D799N

p.G406R

p.S210L  
p.G615G  
p.C293R  
p.E225K

p.T59I  
p.R677\*  
p.R263R

p.E33E  
p.S842L

p.A286T  
p.L219F  
p.P1152S  
p.H31Y  
p.E97E  
p.F306F  
p.G669\_splice  
p.P21P

p.S243L

p.I323S  
p.I1951I  
p.S1061F

p.R578\_splice  
p.Q629H  
p.H26Y  
p.G226R  
p.Q210\*  
p.P198P  
p.R382Q

p.T288I

p.L507L  
p.L225L

p.S192S  
p.I504I

p.A254V  
p.G796A  
p.A336\_splice  
p.F1598F

p.P442T  
p.L172F  
p.G58E  
p.T123T

p.F5F  
p.G153R  
p.T815T  
p.S335S  
p.P221S  
p.P1279L  
p.S2176S  
p.P178L  
p.D446N

p.G346G  
p.R35R  
p.H424R  
p.P52L  
p.R201C  
p.G767\_splice  
p.S692L  
p.V1578A  
p.T126T  
p.S461S  
p.S144S  
p.P88S  
p.D1085N  
p.S3473S

p.A395A

p.L1053L  
p.Q135R  
p.V1789V  
p.G84E  
p.R689P  
p.R460R  
p.Q925\*  
p.S105F  
p.A609V  
p.E149K  
p.D251N  
p.A116A  
p.S452S  
p.Q207Q  
p.G22G

p.G476G  
p.D73V  
p.L334F  
p.G61V  
p.P136S

p.R1482Q

p.S387I  
p.P396L  
p.K234\_splice  
p.P404L  
p.S1495S  
p.P1183L  
p.R1580\*

p.P1415P  
p.G172S  
p.S212F  
p.L478L  
p.E766E

p.S2211F  
p.A413A

p.G916\_splice  
p.K63I  
p.F322F  
p.A105V  
p.F232F  
p.G317D  
p.F412L  
p.S1276F  
p.W34S  
p.P1981S  
p.E210\*

p.K1401\_splice  
p.D179N

p.Q533\*

p.P462S

p.Q1992\*

p.Q84\*

p.G174G

p.T1674T

p.V826V

p.S2070F

p.V184V

p.P893L

p.G752\*

p.P69S

p.P64L

p.R225C

p.R1115W

p.D339N

p.P455S

p.A59A

p.G1048R

p.I448I

p.E506K

p.S71F

p.G284G

p.A63A

p.R980W

p.E239K

p.Q68\*

p.E599K

p.L260L

p.V290V

p.G81E

p.F151F

p.G636G

p.T216N

p.S635L

p.I269S

p.G61G  
p.E859K  
p.A984A  
p.R408C  
p.K181K

p.K707K

p.R140Q  
p.E75K

p.S2027F  
p.Q149\*  
p.Q602\*  
p.E406K  
p.S470S  
p.D7N

p.D811N

p.G6307G

p.G270E

p.S195F

p.E204K

p.L267L

p.R339Q

p.S91F

p.S472S

p.F500F

p.R1297\_splice

p.Y1245D

p.N159D

p.Y258F

p.G1461G

p.S1620S

p.Q2345\*

p.E162K

p.S156S

p.V121A

p.S282L

p.F733C

p.R48H

p.S455\*

p.G622E

p.G75R  
p.A1188V  
p.R191C  
p.G547S  
p.Q160Q  
p.H58Y  
p.G528E  
p.S500F  
p.C127C  
p.D165N  
p.G399E  
p.G55E  
p.P183S  
p.P1059L  
p.A118V  
p.Q761Q  
p.T342T  
p.R145G  
p.Q2659Q  
p.S387F  
p.L395L  
p.I2152I  
p.S414L  
p.P46S  
p.P112L  
p.P749S  
p.F191F  
p.A400T  
p.V520M  
p.S3712L  
p.D1420N  
p.G483R  
p.S57F  
p.D199N  
p.S153L  
p.P99S

p.G791R  
p.V45V  
p.I1631I  
p.P643S

p.F437L

p.H282Y  
p.R197W  
p.G326G  
p.F1762I  
p.E1863K  
p.M456I

p.F11F  
p.T276T  
p.E680D  
p.F951F  
p.P64P  
p.G384E  
p.G46\_splice

p.M213I  
p.T339A  
p.S396S  
p.S253\_splice  
p.P371L

p.I2174I  
p.D1253N

p.S53S  
p.D606N  
p.F477F  
p.K1154\_splice  
p.D388N

p.P1264L  
p.V388V

p.I346I

p.P754S  
p.G1914E

p.S2571L



p.L717F  
p.D302N

p.R247W  
p.S58S  
p.L2379L  
p.G892E  
p.L103L  
p.P286S  
p.L563L  
p.S259S  
p.F985F  
p.D290N  
p.E132K  
p.T155T  
p.R744C

p.E3637E

p.R364Q  
p.P266S  
p.R138W  
p.I288I  
p.E238E  
p.D435N  
p.A876V  
p.G33G  
p.Q204Q  
p.R376C

p.R1015C  
p.W72\*  
p.I2707I  
p.R241W  
p.Q61K  
p.R195K  
p.P155P  
p.G715E

p.G157G

p.Q83H  
p.I96I  
p.S350S  
p.R646C  
p.D394N

p.I620M  
p.F68F

p.G460S  
p.H230Q  
p.M409I  
p.P525L  
p.P489S

p.A770A

p.S46F  
p.G116E  
p.A730V

p.P764P  
p.D497E  
p.S54F  
p.L334L  
p.I51T  
p.I278M  
p.Q253\*  
p.M1315I  
p.K26K

p.R1104R  
p.S781S  
p.R5804Q  
p.E95K  
p.A382T

p.G378E  
p.M214I  
p.D117N

p.C937W  
p.T24K  
p.R492K  
p.E224E  
p.I288I  
p.L523L  
p.F617F  
p.G509E  
p.E257K  
p.R434C

p.V2I

p.L1740L  
p.E10647\*  
p.F236F  
p.S590L  
p.P786S  
p.P1717P  
p.D233N  
p.R19\*  
p.R458P  
p.G169\_splice

p.V200M  
p.G772G

p.A665V

p.G448G  
p.L462L

p.M626I  
p.C133Y  
p.H310Y

p.Q1068\*  
p.I317K  
p.L4649L  
p.L464L  
p.S1172F  
p.I295I

p.S23F  
p.Q137Q  
p.P147S  
p.G1030E  
p.L206I  
p.S267F  
p.H645Y  
p.P226L  
p.G242S

p.S275S  
p.N199I  
p.V128I  
p.K183E  
p.I158I  
p.S323F  
p.R325C  
p.L99L  
p.G419G  
p.R203C  
p.G287R

p.H112Y  
p.E216K  
p.F248F  
p.L697L

p.F35F  
p.R518C  
p.R1550R  
p.S138L  
p.A248V  
p.G1073D  
p.M173I  
p.D948N  
p.P279L

p.P467L  
p.F539L

p.L3174L

p.R299R  
p.R382K  
p.H418Y

p.C516C  
p.P120L  
p.S246F  
p.T575I  
p.K138\*  
p.R359R  
p.P873L  
p.G155E  
p.G458R

p.P49L  
p.H237Y  
p.L1134L  
p.A46V  
p.D813N  
p.R3668S  
p.S595F  
p.G93G  
p.W385\*

p.L101L  
p.R7C

p.A870T  
p.D445N  
p.S149F  
p.T96I  
p.P8S  
p.P489P  
p.N400N  
p.S410F  
p.F606F  
p.K105\_splice  
p.V300I

p.F1057F  
p.I1986I

p.R367\*  
p.V290V  
p.P489L  
p.E429E  
p.S41S  
p.S569S  
p.N332K

p.H243Y

p.K71K

p.L379L

p.K967K

p.S42F

p.D369G

p.E75K

p.R166C

p.E295K

p.M549\_splice

p.E1650K

p.G98D

p.A849A

p.I78I

p.E317K

p.P109L

p.L275L

p.G230R

p.R599R

p.E1332K

p.P5285S

p.E431K

p.P1311S

p.L557L

p.R234H

p.G55E

p.S39F

p.P35S

p.M150R

p.A173V

p.D159V

p.E236D

p.S204S

p.S41S

p.F648F

p.S742F

p.V246A

p.Q65\*

p.F100F

p.L272F

p.R500R

p.L465L

p.R190R

p.S50S

p.I957I

p.E164K

p.G55E

p.S143S

p.L182L

p.A127A

p.D46N

p.L4218L

p.G148S

p.P731L

p.S404F

p.W443\*

p.S158F  
p.F17F

p.P587S  
p.G2112G  
p.Q78\*  
p.M80I

p.F260V  
p.R914Q

p.E1994K  
p.V124A  
p.P397S  
p.D419N  
p.E31K  
p.P275S  
p.P108S  
p.W370\*  
p.P700P  
p.S154F  
p.P97S  
p.G163E  
p.D1467N

p.L494L  
p.P140S

p.I54I  
p.S376S

p.T64T  
p.V557V  
p.P604L  
p.L512L  
p.T57I  
p.P2056L  
p.S370S

p.M285I  
p.I999I



p.A151A  
p.E1079K  
p.R63H  
p.C630S  
p.E113K  
p.T312T  
p.S696F

p.G502G  
p.D3372E  
p.S55F

p.E485\*

p.A1585V  
p.P99L  
p.P32S  
p.E287K

p.P58S  
p.N128N  
p.V195A

p.R284C  
p.G857R

p.G21S

p.G825D  
p.T1650T  
p.A280T  
p.R182\*  
p.I52I

p.F279F  
p.I64I  
p.R232C  
p.P426S  
p.G315E  
p.E110K

p.S29S

p.V1200V

p.G342E

p.P411P

p.S1373L

p.P747L

p.K4432Q

p.T261T

p.L121V

p.Q180Q

p.D2422N

p.P504S

p.Q564\*

p.I454I

p.R79K

p.G436E

p.G391D

p.V1258A

p.G346E

p.I212I

p.S163S

p.V59A

p.D272N

p.V1073V

p.G77E

p.Q241\*

p.Q2326Q

p.I607I

p.M677I

p.T764N  
p.R512\*  
p.P621L  
p.N57Y

p.A356A

p.M1T  
p.V397E  
p.V1211V  
p.P1011P  
p.T312I

p.L580L  
p.R1593R  
p.E508E  
p.G980R  
p.L195L  
p.T302I  
p.E354K  
p.S4F

p.F234F

p.R232H  
p.F828F

p.R285K  
p.K455K  
p.T10T

p.C198C  
p.D102N  
p.R1142\*  
p.F259F  
p.S20F  
p.S1901F  
p.D468N  
p.P33S

p.M284I  
p.L1009V  
p.I121I  
p.P5P

p.R489K  
p.M109I  
p.R1646\*

p.T60T  
p.A827A  
p.R836C  
p.A335V  
p.P715L  
p.V495M  
p.I93V  
p.R99H

p.N917D

p.I848I  
p.P235P  
p.V509V  
p.P320L  
p.F447F

p.V101V  
p.S71F  
p.R2738R  
p.W479\*  
p.S194F  
p.T239T  
p.E1434K  
p.K406K  
p.F156F

p.V67M  
p.D3D  
p.A186V  
p.T1690I  
p.P319S  
p.P524P

p.E1137E  
p.R229C  
p.G533\_splice  
p.H198Y

p.R131R  
p.S524F  
p.S743\_splice

p.L486\*  
p.L447L  
p.S274S

p.A20A  
p.A208A  
p.E1764K  
p.A2745A  
p.F491F  
p.A249A  
p.G93R  
p.L102L  
p.D193N  
p.A172T  
p.P126P  
p.D330N  
p.S1054T  
p.T382I  
p.L1051L  
p.D929N  
p.S654F

p.D748N  
p.Q508Q  
p.E290K  
p.F155F  
p.V303V  
p.G433G

p.P172S

p.G322D  
p.K399K

p.S60L  
p.P197P  
p.W130\*  
p.S1524F  
p.E367K  
p.T1130I

p.S376F  
p.D2415N  
p.S594F  
p.R1610R  
p.R338H

p.R416I  
p.D590N  
p.S526S  
p.V938A  
p.S22F  
p.E314V  
p.V445V

p.L562L  
p.G131G  
p.L338L  
p.R257C  
p.R861W  
p.T57T  
p.P197H  
p.S10283L  
p.S1112F  
p.S211\_splice  
p.T239I  
p.Q555Q  
p.G85E  
p.E843E  
p.L448L  
p.D27N  
p.S107F  
p.A182A  
p.P718L  
p.F638F  
p.S111L  
p.P140S

p.P35P

p.P936L  
p.R123K  
p.Q256Q  
p.Q136\*  
p.R172C  
p.G1183D  
p.R188Q  
p.D286N  
p.S776L

p.E322K

p.E1050E  
p.R102R  
p.V396M  
p.G1588S  
p.V577V

p.S879L  
p.V289\_splice  
p.I1008I  
p.K790E  
p.L844L  
p.R1146\_splice  
p.G423G  
p.L22R  
p.S485F  
p.E73K  
p.P584L

p.P157T

p.F525F  
p.E741K

p.P563L

p.E178\_splice

p.T32A

p.L925F

p.L1069F

p.G621E

p.T607S

p.P1272P

p.D854N

p.P287L

p.T41I

p.M81I

p.G270D

p.E544\_splice

p.S394F

p.S6380F

p.R413\_splice

p.E1478K

p.A141A

p.T575T

p.A27A

p.P563S

p.P560S

p.F88F

p.E525K

p.T136T

p.R325\_splice

p.P2070S

p.S583F

p.G1040E

p.S479F

p.M681I

p.G281R

p.F202Y

p.P185L

p.S866S

p.N454N

p.P341L

p.L197L



p.M831I

p.F1045F

p.R159Q

p.G169R

p.R648R

p.G85R

p.P707S

p.D94fs

p.S754fs

p.L666fs

p.K2234K

p.R780W

p.G123R

p.L2792L

p.P477L

p.Q144\*

p.L173F

p.A524V

p.R166\_splice

p.P118P

p.V46V

p.F518C

p.E250K

p.V24417A

p.F1439S

p.F499F

p.I72I

p.V269I

p.F11F

p.V441V

p.S246L

p.R80\*

p.S1004S

p.T378T

p.F1623F

p.S745S

p.E547K

p.L480F

p.G727G

p.S257S

p.P672P

p.P357S

p.M1128I

p.G1478G

p.E635K

p.Q42\*

p.G132S

p.G88E

p.V32G

p.S190F

p.E1485K

p.P108S

p.K180K

p.G102E

p.P758L

p.I361I

p.K182K

p.P259S

p.R350C

p.V808V

p.S257L

p.S257S

p.R219C

p.Q218Q

p.A317V

p.P223L

p.S1212F

p.S55F

p.E427V

p.F182F

p.R170G

p.G847R

p.R458R

p.R586R

p.P144L

p.P193S

p.I290S

p.P118R  
p.S1580F  
p.G1391E  
p.I50I  
p.L199L  
p.E418K  
p.R803W

p.S194L  
p.H605Y  
p.S249F  
p.G65S  
p.A105A  
p.T367T  
p.Q619\*

p.P540L  
p.W282\*  
p.E975K  
p.N65S  
p.G234A  
p.E693\_splice

p.S76L  
p.S789S  
p.R131R  
p.F246F  
p.T1239T  
p.G113E

p.D408N

p.S515L  
p.S31F  
p.D246N  
p.S773F

p.S935F  
p.G63R  
p.S832F  
p.E218K

p.G814D  
p.E582K

p.L156F  
p.Q399\*  
p.S14F  
p.A315T  
p.N19\_splice  
p.G175D  
p.I233I  
p.P277S  
p.I465I  
p.A399A

p.H65Y  
p.G27570E  
p.L1451L  
p.S240\_splice  
p.S485S  
p.G297D  
p.S94F  
p.L290M  
p.S603F  
p.P698P  
p.E348D  
p.I52I  
p.E1795K  
p.I547I

p.I149I  
p.R119\_splice  
p.S284F

p.E79K  
p.M85I  
p.M25I  
p.T130T

p.L210L  
p.A234T  
p.W3580C

p.L85F

p.P2071S  
p.T527T  
p.E193K  
p.E152K  
p.G725E  
p.I3I

p.K387E  
p.M945I  
p.D1210N

p.P112S

p.P237L  
p.D3663N  
p.D152N  
p.S548F  
p.I832I  
p.R1588Q  
p.F250F  
p.G1239D  
p.R1529Q  
p.G219E  
p.V217V  
p.A125D  
p.G510E  
p.F316F  
p.E578\_splice  
p.P94P  
p.Q354Q  
p.P316L

p.S212F  
p.L63F  
p.V277I  
p.P548L  
p.S504L  
p.P328S  
p.S27F  
p.K428K  
p.R498Q  
p.S216F

p.S527L

p.L651L

p.S190S

p.Q50\*

p.R2145Q

p.F733F

p.P647P

p.F180L

p.S21L

p.F344F

p.H241Y

p.P361L

p.F179F

p.G866G

p.G426E

p.P3L

p.S1078F

p.E812K

p.G458R

p.G587G

p.F2110F

p.T35I

p.H184Y

p.K30K

p.P243P

p.G3674E

p.P1469L

p.E105K

p.E323K

p.G168R

p.A108V

p.L116L

p.W277\*

p.I763I

p.G147G

p.Q190R

p.G231E

p.E367K

p.T6T

p.S6465L

p.G2474E

p.V505V

p.F87F

p.W315\*

p.Q142\*

p.G3024E

p.I391I

p.R251K

p.G56E

p.E30E

p.G88R

p.L63L

p.F180F

p.G153\_splice

p.S222S

p.L351F

p.L374L

p.R122C

p.P452S

p.A311V

p.I327I

p.G295E

p.\*608\*

p.H244Y

p.I245I

p.R919R

p.D426N

p.K89K

p.S306L

p.V430V

p.I250I

p.K232E

p.I12L  
p.P536S  
p.Y132\*  
p.R783C  
p.V13\_splice  
p.E1857K  
p.G809R  
p.R599R  
p.S502F

p.G1762D

p.P1205L  
p.H1743Y

p.S238L  
p.P74S  
p.M354I  
p.L86L  
p.W1580\*  
p.P1054P  
p.D1817N  
p.P447S  
p.E53K  
p.I295I  
p.G32E  
p.D502N

p.I3285I  
p.G1557E  
p.A840V  
p.D422N  
p.A268A  
p.G424E  
p.R693K  
p.S178F  
p.S315L  
p.G1596G  
p.P247H  
p.A105V

p.Y161\*



p.G2839R  
p.G522D  
p.R209W  
p.I189I  
p.E338\*  
p.G382E  
p.G34S  
p.G459E  
p.I225N

p.A196A  
p.P613L  
p.E319K

p.S1277S  
p.P189L  
p.E170K  
p.N2795D  
p.P350P  
p.V264V  
p.G632G  
p.C535C  
p.P422P  
p.I369I  
p.E1318K  
p.E188K

p.F366F  
p.E667K  
p.G160R

p.D369N

p.L86L  
p.G343E  
p.G647R  
p.G793R  
p.P345S  
p.R10Q  
p.S1352S  
p.L810L

p.S897F

p.E1015K  
p.P951L  
p.R173W  
p.F471F  
p.F488F  
p.R152\*  
p.S271F  
p.E220K  
p.E328K  
p.L2311L  
p.E2K  
p.Y170Y  
p.G578D

p.G670E

p.G48E  
p.R34\_splice  
p.C2287C  
p.H595Y  
p.E32K  
p.R1090R  
p.F222F  
p.R204C  
p.S543F  
p.E254K  
p.E463K  
p.H278Y

p.K20K  
p.E200K  
p.E46K  
p.D155N  
p.S220S  
p.Y503Y  
p.F274L  
p.T126T  
p.S3026S  
p.F214F  
p.S445F  
p.R313Q  
p.F17F  
p.P123S

p.G83G  
p.P309L  
p.P625S  
p.G265R

p.V314V

p.I299I  
p.F52F

p.V414V  
p.F210F  
p.P192S  
p.F298F

p.M68\_splice

p.M1I  
p.M568L  
p.P383L  
p.S297S  
p.H52Y  
p.P244S

p.G19G

p.M58I  
p.D87N  
p.F106F  
p.Q19R  
p.L43F

p.R1449W

p.L639F  
p.F579F  
p.E45K  
p.G266E  
p.P194L  
p.S500L  
p.E1030K  
p.P1288S  
p.I1491I

p.F2045F

p.R337M  
p.W371\*  
p.P1207S  
p.P336S  
p.V930I  
p.L419L  
p.R470C  
p.G434G  
p.G2\*  
p.V595V  
p.A611A  
p.G847E

p.M326V  
p.R493W

p.I221I  
p.L29L  
p.P540S  
p.D505N

p.G3446R  
p.P432L  
p.L451L  
p.E334K  
p.F66F  
p.F601F  
p.C189F  
p.P481L  
p.S641L  
p.G29R  
p.T3670T

p.D1569N  
p.F115F

p.P1358L  
p.Q293\*  
p.Y277F

p.G27R  
p.E1886K  
p.L723H  
p.R162\_splice  
p.R1060Q  
p.E36K  
p.F1306F  
p.P339L  
p.V200V  
p.P670L  
p.L863F  
p.W278\*  
p.E555E  
p.S104Y  
p.F233F  
p.S90S  
p.G1993R  
p.P148R

p.F615F

p.P736S  
p.P540L

p.D175N  
p.P69S

p.G270\_splice  
p.P166L  
p.P419S  
p.A388V  
p.G324S  
p.E159K  
p.S295S  
p.L133L  
p.E368K  
p.T1255T  
p.P77L  
  
p.M581I  
p.E252K

p.G794E  
p.D247N  
p.G655E  
p.G436S  
p.M292I  
p.P64S  
p.M1I  
p.R819K  
p.P362P  
p.F421F

p.Q144R  
p.L619L  
p.P672P  
p.S504L

p.S939F  
p.Q61H  
p.G784E  
p.E1581K  
p.R66\*  
p.R236K  
p.L18F  
p.A517A  
p.G537\_splice  
p.P522L  
p.F163F  
p.E32E  
p.T221T  
p.H1140Y  
p.P143L  
p.T196I

p.S1354\_splice  
p.A627V  
p.R158R  
p.S19N  
p.F314F  
p.H223Y

p.R352\*  
p.R867C

p.S5959F  
p.A156V

p.E396K  
p.G380E  
p.S765F  
p.I238I  
p.F597F  
p.I433I  
p.S1252F  
p.T601T  
p.Q170Q  
p.H170Y

p.G1220R  
p.S311N  
p.S285\*  
p.G449E  
p.W593\*  
p.V205M  
p.S470F  
p.S370L  
p.F569F  
p.N42N  
p.T449T

p.G482\_splice

p.F383F  
p.G155E  
p.S650S  
p.G191G  
p.S666F  
p.F406F  
p.A521A

p.G21789R  
p.Q2553\*  
p.N261S  
p.P2722S

p.V375V  
p.N48N  
p.P1252S  
p.P375S  
p.P395L

p.H230\_splice

p.I788I

p.I333I

p.H836Y

p.D22D

p.F246F

p.E1273K

p.P1069S

p.H544Y

p.I554I

p.D811N

p.F178F

p.G425E

p.T1071T

p.T859T

p.F71F

p.L561F

p.R1072K

p.R534C

p.L386L

p.E266K

p.G362E

p.I323I

p.V64V

p.E362K

p.P227L

p.E204K

p.G19E

p.P3813S

p.P4S

p.D64N

p.Y173H

p.I583N

p.S599S

p.S385F

p.R1294K

p.H1474N



p.R121C  
p.P202S  
p.K1089N  
p.D2492H

p.I1218I  
p.L1313L  
p.G395D  
p.P57P  
p.S57S  
p.G418R  
p.G3265E  
p.L774L  
p.A497A  
p.P1795S  
p.P799S  
p.S190L  
p.P584L  
p.V290V  
p.R211W  
p.W1168C  
p.D348N  
p.L49F  
p.F50F  
p.P50S  
p.F70F  
p.F407L  
p.P540S  
p.E616K  
p.S351F

p.S267S  
p.S360S  
p.E567K  
p.P1262L

p.F395F

p.N397I

p.S553F

p.P531P

p.E13E  
p.W111\*  
p.R125R  
p.M376I  
p.K929K  
p.L233L  
p.V797G  
p.S413F  
p.Q182Q  
p.G379D  
p.R307K  
p.F508F  
p.S415S

p.D252N  
p.P156L  
p.P347L

p.V1082V  
p.L419L  
p.I1388I

p.K441N

p.P1681L  
p.G587R  
p.E34K  
p.G145G

p.I897I  
p.A959V

p.S10100L  
p.T280T

p.G584\_splice  
p.G671S  
p.V258\_splice

p.S611S  
p.L539L  
p.D629N

p.L179L  
p.E184K  
p.L160L

p.K134E  
p.R167K  
p.S283S  
p.P309S  
p.G204R  
p.H521Y  
p.E2181K  
p.P204S  
p.V456V  
p.P324S  
p.I364I  
p.F288F  
p.P1330P  
p.V255V  
p.L222L  
p.D150N

p.L143F  
p.H595Y  
p.D2372N  
p.H64Y  
p.G207E

p.V419V  
p.S185F  
p.S468L  
p.E755K  
p.L504L

p.D402D  
p.F214F  
p.R1309C  
p.S563F  
p.S1313L  
p.W551\*  
p.E354K  
p.P113S  
p.S249S  
p.G977R

p.V345V  
p.M886I  
p.P68S

p.G166R  
p.Q454\*  
p.P173L  
p.V245L

p.E168K  
p.K331K  
p.R1611R  
p.P279S  
p.V689V  
p.F239F

p.T68T

p.D1432N  
p.G128S  
p.L367L  
p.A128A  
p.K431R  
p.R277Q  
p.V91A

p.R78K  
p.R282C  
p.L594L  
p.P21S

p.F37F  
p.W15\*  
p.R211C  
p.E80K  
p.R10R  
p.S163F  
p.P265S  
p.I440I  
p.P1449S  
p.A267V  
p.P607L

p.R150C  
p.E581K  
p.T477I  
p.S694F  
p.W102\*

p.Q377Q  
p.R50R  
p.F893F

p.P605S  
p.I28I  
p.E117K  
p.P696S  
p.S877S  
p.F1023F  
p.P281T  
p.D50D

p.F313F  
p.S369L  
p.Y4324Y  
p.G55E  
p.S1142F  
p.P354L  
p.P1023L  
p.G597E  
p.I187I  
p.S11S  
p.T74I  
p.D143N  
p.P507S  
p.A1355A  
p.E2610K  
p.A1738A  
p.R264Q  
p.D100N  
p.Q106Q

p.G752G  
p.I4039I  
p.G266\_splice  
p.S1098S

p.D192D  
p.S287F  
p.K514K  
p.G129R  
p.P1055S  
p.L78L  
p.G647G  
p.E2393K  
p.T7602I  
p.S1018C

p.R98C  
p.R96\*  
p.H358Y  
p.Q645\*  
p.L1439L  
p.P230S  
p.V357V  
p.A169V  
p.V303V

p.S21F  
p.L454F  
p.R712Q  
p.K212\_splice

p.S739L  
p.S2036F  
p.P40S  
p.S407L  
p.G15E  
p.S19F  
p.L470L  
p.L220P  
p.P38S  
p.F590F  
p.Q307Q  
p.G202D  
p.E1062K  
p.W248\*  
p.F346F

p.P1585P  
p.R756R  
p.S696S  
p.R2744\*  
p.S212L  
p.G967G  
p.I221I

p.N2653D  
p.V61V  
p.D125E  
p.W29\*  
p.P35S  
p.G2302G  
p.L203L  
p.T273A  
p.V239V

p.E199K  
p.F123F  
p.G580G  
p.E1309K  
p.S151F  
p.I852I  
p.E93K

p.T687T

p.P354T  
p.H599Y  
p.L617L  
p.S873F  
p.P6632S  
p.P50S  
p.S335S  
p.I58I

p.S234F  
p.G152D  
p.G116E  
p.Q396Q

p.G1175E  
p.P631S  
p.L347L  
p.P23S

p.W140\*  
p.R168Q  
p.P64L

p.G159G  
p.G89G  
p.G618R  
p.R317Q  
p.A144\_splice  
p.W227\*  
p.M487I  
p.M2178I  
p.G79S

p.E719K  
p.S7877F  
p.D10\_splice  
p.E69K  
p.I186I  
p.F54F  
p.F4126F  
p.G1902R  
p.R809K  
p.E592K  
p.G828E  
p.R1927K  
p.P949L  
p.S825F  
p.I267I  
p.P516L  
p.G498S

p.S423F

p.F318F



p.G110E  
p.D405N  
p.Q1157\*  
p.I761I  
p.G197E  
p.G312R  
p.T684I  
p.I48I  
p.L100F  
p.S75S  
p.G643G  
p.F242F

p.P194L  
p.F730F  
p.S71P  
p.G78R  
p.R436K  
p.A500T  
p.G380E  
p.P67P  
p.F18F  
p.I287L  
p.P521S  
p.W1693\*  
p.E560K  
p.D498N  
p.A757T  
p.L690L  
p.L167F  
p.F141F  
p.D275\_splice  
p.K3923E  
p.Q12\*  
p.I297I  
p.I26I  
p.F463F  
p.P224S  
p.R1007W  
p.D1817N  
p.R842Q  
  
p.H636Y

p.S154N

p.L119L

p.S145F

p.S369F

p.E446E

p.P328S

p.P5090L

p.R545Q

p.I92I

p.A567A

p.Q280\*

p.Q1140\*

p.P1047L

p.S841L

p.R2420C

p.G404\_splice

p.Q976\*

p.Q169Q

p.V932V

p.G39G

p.D6476N

p.H251Y

p.E330K

p.H834Y

p.S354F

p.H151Y

p.R116W

p.G1770S

p.I630\_splice

p.E45K

p.R456R

p.Q105\*

p.F785I

p.T197I

p.V260V  
p.P222S  
p.D122N  
p.M1I  
p.G356G  
p.F94F  
p.P717L  
p.V291V  
p.G217R  
p.R369\*  
p.S54S  
p.G522S

p.L1030F  
p.I425\_splice  
p.E304K  
p.E308K  
p.S796F  
p.S5614F  
p.T684P  
p.G704\_splice  
p.F108F

p.E1346K  
p.I515I  
p.P271P  
p.T5268T  
p.G571R  
p.F665F  
p.R181C  
p.V489V  
p.E610K  
p.P110P  
p.S61L  
p.A449A  
p.K217K  
p.H838Y  
p.R188C  
p.I74I  
p.S161P  
p.E493K  
p.R9G  
p.L1499L

p.P104L  
p.P99S  
p.Q3\*  
p.P551S  
p.P113L  
p.K212\_splice  
p.L122F  
p.M713I  
p.M632I  
p.Q503\*  
p.P2725L  
p.F1165F  
p.R108\*  
p.H252Y  
p.P447L  
p.Q827Q

p.V167V  
p.R431K  
p.E644K

p.T268T  
p.A236V  
p.R495C  
p.T300S  
p.S995N  
p.R14Q  
p.P194P  
p.P2T  
p.P366S  
p.S347F

p.S216F

p.F228F  
p.S93\*  
p.V1558V  
p.G395S  
p.A58A  
p.Q8Q  
p.F760F  
p.L381L

p.P278L  
p.P6999H  
p.S581F  
p.Q145\*  
p.S299S  
p.P2950S  
p.R225K  
p.F602F  
p.T246T  
p.A365\_splice  
p.P4260S  
p.S142F  
p.F913F  
p.T601\_splice  
p.P1965L  
p.P1349L  
p.G230E  
p.S340L  
p.R119\_splice  
p.D247N  
p.E180\_splice  
p.A779A  
p.P474L  
p.S155F  
p.S316L

p.M1I  
p.S419F  
p.G140\_splice  
p.R415G  
p.S57F  
p.R549Q  
p.E906\*  
p.D606N  
p.F1123F  
p.F759L  
p.G180G  
p.D250N  
p.N348N  
p.R253S  
p.P1051L

p.E510K  
p.P149L  
p.E92K  
p.G27570G  
p.P316S  
p.Q460Q  
p.P2217L  
p.Q437\*  
p.L62F  
p.F263Y  
p.I85I  
p.T1098I  
p.G2130E  
p.M24I  
p.P185S  
p.\*391\*

p.L197I  
p.G18R  
p.L399L  
p.V21V  
p.G511E  
p.F212F  
p.L364L  
p.R859C  
p.G522R  
p.L226V  
p.F101F  
p.R272R  
p.G2G  
p.W41\*  
p.P56S  
p.P744S  
p.L2090L  
p.V124V  
p.F103F  
p.I273I  
p.I51I  
p.F197F  
p.S429S  
p.L278L  
p.L62F

p.Y486C

p.S1714S  
p.D1624N  
p.L322L

p.P298S  
p.L300L  
p.R221\*  
p.P1053S  
p.R133R  
p.R359K

p.G286S  
p.F277F

p.E213K  
p.T256T  
p.G32E  
p.G475E  
p.S510S  
p.E75E  
p.R936\*  
p.L2048L  
p.R453C  
p.E60K  
p.F1983F  
p.R218C  
p.H973Y  
p.S917L  
p.G593E  
p.A267T  
p.P377L  
p.R260Q  
p.I439I  
p.E233K  
p.T719I  
p.I3034I

p.R489W  
p.R72\*  
p.F136F  
p.S1945F

p.G923G  
p.G281R  
p.G283G

p.V280I  
p.L337L

p.G237R  
p.K1096K  
p.G505R  
p.S257F

p.S241F  
p.E639K

p.R358T  
p.H555Y  
p.H1062H  
p.P998S  
p.P59S  
p.F328F

p.P852L  
p.G435G  
p.A145A  
p.R274K  
p.V63V  
p.A8810A  
p.E99K  
p.P736L

p.F265F  
p.D825N  
p.R1586K  
p.L604L  
p.R186Q  
p.G70E

p.T455I  
p.T833T  
p.R1186Q  
p.G1776E



p.Q832Q  
p.P17S

p.G1022D  
p.R892Q  
p.D130N

p.G809E  
p.A21A  
p.P104S

p.P9373L  
p.L14L  
p.W139\*  
p.I11I  
p.G618E  
p.S733F  
p.L388L  
p.I331I  
p.G90R  
p.A150V  
p.G134E  
p.R467K  
p.R211R  
p.A169A  
p.G1430E  
p.F836F  
p.F549I  
p.Y16Y  
p.L850L  
p.E775K  
p.S1252S

p.G224E  
p.P477P

p.N93N  
p.G823R

p.E127K  
p.G210E  
p.S261F

p.R366Q  
p.S29S  
p.R637R  
p.R594C  
p.L212L  
p.V1049M  
p.M2481I  
p.F72F  
p.S261F  
p.G925D  
p.L254Q  
p.G2414E  
p.K368K  
p.I343I  
p.R60K  
p.L15L

p.G20G  
p.A177T  
p.A333V  
p.R87C  
p.S110L  
p.Q124\*  
p.P1232L  
p.F232F

p.L436L  
p.K336R  
p.G1448\_splice  
p.G168E  
p.R969\_splice  
p.Q936H

p.H169Y  
p.L56L  
p.P1288L  
p.E310K  
p.I288I  
p.L253L  
p.E105E  
p.Q199\*

p.G65S

p.K36K  
p.S284F  
p.P74S  
p.N119S  
p.R354W  
p.L160L  
p.P1965S  
p.I417I  
p.E305K  
p.F150F  
p.K45N  
p.R181C  
p.G458E  
p.E221K  
p.A81\_splice  
p.R168Q  
p.D6N  
p.T244T  
p.F676F  
p.T48I  
p.A34A

p.E283K  
p.S305F  
p.F171F  
p.Q1765Q  
p.S79S  
p.G294D  
p.L220L  
p.P852P  
p.E298E  
p.R98R

p.R432C

p.G616G  
p.L6F  
p.V24V  
p.E228Q  
p.L230L  
p.S364F  
p.E492K  
p.Q304\*

p.G294V  
p.S201F  
p.E425K  
p.M149I  
p.F39F  
p.A804V  
p.H583Q  
p.L221L  
p.P529S

p.G51R  
p.F189F  
p.P43S  
p.D126N  
p.I431I

p.E81K  
p.P142S  
p.L961F  
p.P4360S  
p.S22L  
p.G325G  
p.F13F  
p.G155R  
p.Q913\*

p.E781\_splice  
p.D2922N

p.L291F  
p.G658R

p.V1259\_splice  
p.D798N  
p.R1161K  
p.G217E  
p.T70T  
p.P481S  
p.Q486\*  
p.A552V  
p.P213S

p.E245K  
p.E1240K  
p.G239R  
p.V569V  
p.F171F  
p.E628K  
p.G88S  
p.G597G  
p.E5693K  
p.I292I  
p.T93I  
p.H374Y  
p.S523F  
p.G73S  
p.F104F  
p.E219K

p.I1764I  
p.S79F  
p.I247I

p.F260F  
p.L800V  
p.R24R  
p.A161V  
p.S826F  
p.I64V

p.I434I  
p.F434F

p.K1094K  
p.S104S  
p.E196K  
p.L276F  
p.G262R  
p.T36I  
p.P883P  
p.E562K  
p.M1836I  
p.G223D  
p.G1221G  
p.E978K

p.A110A  
p.E530K

p.G731E  
p.E95K  
p.A625A

p.M1682I  
p.E2613K  
p.P437L  
p.P31S

p.L301L  
p.F275F  
p.F328F  
p.R303Q  
p.P717S  
p.E1566K  
p.V88V  
p.T553A  
p.R114K  
p.E574K  
p.M847I  
p.A209V  
p.Y12\*  
p.H566Y  
p.E176D  
p.E373K  
p.E71K

p.G231S  
p.L1719L  
p.S181F  
p.F215F  
p.T268I  
p.E97K  
p.T300I  
p.R684K  
p.V205V

p.P2L

p.E650\*

p.R36C

p.S88N

p.E862K

p.F3651F

p.Q116L

p.R82C

p.E388K

p.Y464H

p.S434S

p.I1194I

p.P71L

p.W959L

p.S504F

p.S173F

p.K422K

p.F374F

p.P946S

p.F419F

p.Q3671\*

p.G280G

p.D291N

p.D148N

p.A1211A

p.E308E

p.E190K

p.A169V

p.L41L

p.P627L

p.E1084K

p.S1470L

p.Y398C

p.F95F

p.S1400F

p.P350S

p.R1012C

p.R1925\*

p.P403S

p.S356L

p.G107R

p.F1899F

p.W527\_splice

p.G701R

p.V580V

p.D428N

p.F142F

p.R614Q

p.G2R

p.I648I

p.H187Y

p.P155P

p.E194K

p.L512L

p.D1449H

p.S277L

p.H268Y

p.E937K

p.I151I

p.R380R

p.V596G

p.P148L

p.R163C

p.R114K

p.L86L

p.E307K

p.I62I

p.P1200S

p.G581R

p.P281L

p.R1076I

p.I153I

p.P489S

p.G276E



p.L1117L  
p.P149P  
p.S314L  
p.G2335E  
p.S691L  
p.R188W  
p.L275L

p.D3704N  
p.D225N  
p.L289L  
p.V230V  
p.E790K  
p.S320F  
p.G149\_splice  
p.S186L  
p.S173S  
p.I221I  
p.E482E  
p.S63L  
p.E753K  
p.F75F  
p.S5097L  
p.D281N  
p.E1141K  
p.E575K  
p.S755F

p.R2976K  
p.S200S  
p.G207R  
p.R28R  
p.V1104V  
p.P3102S  
p.A441A  
p.P446S  
p.G12E  
p.E718D  
p.Q45\*  
p.P1898S  
p.S649L  
p.R89Q

p.A292V  
p.R825K  
p.W363\*  
p.A107T  
p.G118E  
p.G689E  
p.M730I  
p.I374I  
p.E616E

p.E502K  
p.E1552K  
p.I314I  
p.G426R  
p.G520G  
p.G809R

p.E1228K  
p.E1001K  
p.E935K  
p.G733R  
p.S466L  
p.S214S  
p.P329L  
p.P373S  
p.W74\*  
p.E197K  
p.E256K  
p.S128F  
p.R184C  
p.P215L  
p.E545K  
p.P386S  
p.P890L  
p.N30K  
p.P1594P  
p.E20K  
p.L270L  
p.E184K  
p.G183D  
p.E5652K  
p.F288Y  
p.A224V

p.R3069K  
p.T364T  
p.E1009K

p.P392S  
p.L254L

p.L596L  
p.V399M  
p.S65F  
p.R306C  
p.F518F  
p.A191V  
p.E4595K  
p.T220I  
p.G2057S  
p.S1281F  
p.R162C  
p.R919K  
p.L418L  
p.D362N

p.L1084L  
p.M275\_splice  
p.L643L  
p.W435\*  
p.Q216\*  
p.P58S  
p.W658\*  
p.S192S  
p.I446I  
p.W1401\*  
p.P1112P  
p.P107S  
p.P3094L  
p.G173R

p.F795F  
p.E639E  
p.D201N  
p.I250I  
p.A253E

p.Q25Q  
p.L391F  
p.D462N  
p.A365\_splice  
p.N158K  
p.S216F  
p.S603S  
p.G385G

p.P199S  
p.P126S  
p.G1673E

p.P42L  
p.R3017W  
p.R63\*  
p.P344S  
p.F261Y  
p.S5S

p.I146I  
p.D277N

p.T218I

p.P241P  
p.I2498I

p.L156F  
p.G105D  
p.G49E  
p.S367F

p.S773F  
p.Y877Y  
p.P101P  
p.H100H  
p.S602F  
p.D155V  
p.V1320I  
p.E421K

p.K48\*

p.S123F

p.I42I

p.S101L

p.G302S

p.S1495\_splice

p.L70L

p.E1023E

p.S209F

p.R269R

p.G525R

p.E337K

p.E1472K

p.P403L

p.R258Q

p.V230V

p.G1008E

p.E411K

p.D132N

p.S1106S

p.P247T

p.S1881F

p.G955A

p.A750A

p.P101L

p.P354L

p.K573K

p.E618K

p.F121F

p.S192F

p.G75A

p.F3659F

p.Q111\*

p.G98G

p.H698R

p.V143V

p.S1070S

p.L110L

p.E269E

p.G463R

p.R667Q

p.P529L

p.S252F

p.P341S

p.E335K

p.G731R

p.E1698E

p.G329\_splice

p.Q203Q

p.E276K

p.G907G

p.K452I

p.F33F

p.G171E

p.S46S

p.P915L

p.S684F

p.I100I

p.G314G

p.Q6034K

p.L567L

p.P342S

p.S572L

p.F200F

p.R28R

p.E35E

p.S111L

p.R499R

p.R16C

p.Q626\*

p.P522S

p.F372F

p.E180\_splice

p.D2N

p.P47L

p.G678G  
p.H321Y  
p.W1612\*  
p.R118\*  
p.E3059K  
p.M96I

p.G931E  
p.A627A  
p.G1192G  
p.G1034E  
p.G333G  
p.A381A  
p.R1126R  
p.S297F

p.S313L  
p.I136I  
p.V447V  
p.T624T  
p.M390T  
p.E982K  
p.S92F  
p.L1289L

p.TS91del  
p.R127fs  
p.A3019fs  
p.T1577fs

p.G252R  
p.D420N  
p.R389C  
p.S94F  
p.P282L  
p.F511F  
p.V243V

p.L165L  
p.A76A

p.L293L  
p.R1557R

p.E315K

p.F93F

p.G10G

p.L183F

p.F2047F

p.Y330\*

p.R97\*

p.S295N

p.P103L

p.V1111A

p.P41S

p.F671F

p.S909S

p.I141I

p.A356V

p.F251F

p.R8547R

p.V423G

p.\*890\*

p.G202G

p.E32K

p.L145R

p.L351I

p.G252R

p.P1209A

p.S227S

p.A204A

p.W316\*

p.G154E

p.D217G

p.T2164I

p.Q105Q

p.E42K



p.P101L  
p.P628S  
p.G2478G  
p.W86\*  
p.R536R

p.V552M  
p.E117K  
p.Y59Y  
p.R168K

p.S20S

p.A701T

p.S214L  
p.R520R  
p.P307L

p.S59N  
p.I375T  
p.E289K  
p.P2444L  
p.W101\*  
p.Q753\*

p.P17S  
p.R352R  
p.R4077\_splice  
p.E277K

p.Y128\*  
p.E6K  
p.P266S

p.V727V  
p.P1017S  
p.S389F  
p.R600\_splice  
p.H56Y

p.G546D  
p.K223K  
p.A187A  
p.G698D  
p.S226S  
p.S5042F  
p.P615L

p.G21G  
p.H445Y  
p.D373N  
p.Q65H  
p.G142E  
p.P159P

p.R830W  
p.P2219S  
p.G1708R

p.S404\_splice  
p.K18471K

p.S283S  
p.I219I

p.F197F

p.R156Q  
p.W1001\*  
p.P817L  
p.S1334L  
p.S192F  
p.S441F  
p.E5902K  
p.E90K  
p.I84I  
p.L18L  
p.R155\_splice

p.I925I

p.E797K

p.G203E

p.G195E

p.D146N

p.P626L

p.A162A

p.H992Y

p.L414L

p.S1692S

p.D436N

p.F577F

p.F482I

p.S1317S

p.P86S

p.R14C

p.P110S

p.D198N

p.P469L

p.D254N

p.G131E

p.G62R

p.M630L

p.S296S

p.K304E

p.R199\*

p.L4190L

p.H1106Y

p.P46S

p.L192L

p.D124N

p.H507\_splice

p.G305S  
p.E77K  
p.R377R  
p.R464\*  
p.R332R  
p.G2235G  
p.S18F

p.D194N  
p.L980L  
p.W559\*  
p.I280I

p.T2189T

p.L221F  
p.G739E  
p.A311V  
p.L162L  
p.V44V  
p.R526K  
p.R53R  
p.P466L  
p.S346S

p.F488L  
p.R406W  
p.I336I

p.S685F  
p.E713K  
p.S334N  
p.C431Y

p.I415V  
p.F417F  
p.G154R

p.P615L  
p.L117F  
p.L601F

p.G931E  
p.I129I  
p.F707F  
p.A158T  
p.E479K

p.S639L  
p.G275E  
p.Q161Q  
p.A413S

p.L156F  
p.L492L

p.P100S

p.D248N  
p.P883S  
p.M76I  
p.L1483L  
p.I931I  
p.S479S

p.L666L  
p.E809E

p.Q370\*  
p.V981M  
p.L717L

p.P1070S  
p.D873N

p.R329R  
p.E34K  
p.E1104K  
p.P358P  
p.E5K  
p.M27I

p.N177Y  
p.P290S  
p.L110L  
p.S604S  
p.P187S

p.R323K  
p.P624S  
p.V1293V  
p.P37S

p.P4004S  
p.L321L  
p.L161F  
p.I148I  
p.P7L

p.E388K  
p.P492Q

p.D124N  
p.E356K  
p.D81N  
p.P596S  
p.R27Q  
p.E12K  
p.I1218S

p.E5K  
p.F333F  
p.G147E  
p.F52F

p.P24S  
p.H232Y

p.S85S

p.L206L  
p.E641K  
p.E1701K  
p.K368R

p.R645C  
p.E354K  
p.Q11502Q

p.E144K  
p.L269F  
p.K1628K  
p.S667F

p.V337V  
p.S136F  
p.S423F  
p.P152P  
p.P236S  
p.L19L  
p.V1260I

p.Y153F  
p.P82S  
p.S758F  
p.A322T  
p.R573K

p.G291E  
p.G1028G

p.P346S  
p.L68R  
p.P681S  
p.S4172P  
p.G782R

p.P36P

p.R520Q

p.G562S  
p.P530L  
p.L335L

p.D744N

p.P797S  
p.H584R

p.S764L

p.D173N

p.R306H

p.G816R

p.C102C

p.T2444T

p.M114I

p.G579R

p.R834C

p.T478I

p.S18F

p.G46E

p.P225L

p.P95P

p.E218D

p.P158L

p.G123E

p.A487A

p.S271F

p.K106\*

p.S586F

p.D489N

p.G119E

p.A257A

p.S480F



p.H271Y

p.T52T

p.L181L

p.G899G

p.L502F

p.S196F

p.P4290L

p.R66R

p.P383P

p.R11500K

p.S978S

p.A329A

p.F87I

p.G69G

p.G501\_splice

p.S2140S

p.R289R

p.L515L

p.R1135\*

p.I11I

p.R191Q

p.K241K

p.T296M

p.L899F

p.P323L

p.H265Y

p.E482E

p.P445L

p.P318S

p.S405S

p.G83R

p.Q101H

p.S85S

p.P1239S  
p.R488R  
p.G115D

p.N630K  
p.A303V  
p.Q1719\*  
p.E1106K  
p.P2300P

p.E6K  
p.R154R  
p.G56S

p.S677F

p.R20R  
p.G405S  
p.S267F  
p.S207L

p.M138I  
p.G329E  
p.S733F

p.G492E

p.A344A

p.T61I  
p.M921I  
p.F73F  
p.N178I  
p.Q149\*  
p.D291N  
p.A1223S

p.A16T  
p.D205\_splice  
p.R10680K  
p.P321S

p.S959F  
p.S222S

p.T660I

p.P539S

p.P621S

p.S488T

p.S103R

p.R240C

p.F1065F

p.G173S

p.E566K

p.R143Q

p.E451K

p.E326K

p.G294R

p.R475R

p.W544\*

p.R332Q

p.L145L

p.G349E

p.P1434L

p.G546E

p.P115P

p.P433L

p.E565K

p.E671K

p.E265K

p.L463F

p.L360F

p.D238N

p.E490E

p.F2503F

p.E504K

p.G123E

p.V664E

p.F284F

p.R1050R

p.E1161K  
p.I190I  
p.G1250E  
p.L97L  
p.F2419F  
p.P451P

p.P1591L

p.V353V  
p.L378F  
p.G1543G  
p.F1008F  
p.S116F  
p.P1652S  
p.R143\*  
p.P30S

p.S36F  
p.R173W

p.E31K

p.E6K  
p.F200F

p.V140A  
p.L111L

p.D281N  
p.P198S  
p.G2R  
p.R283\_splice  
p.R724K  
p.A83A  
p.R466K  
p.A314V  
p.T99T

p.G102R  
p.E185E

p.P55L  
p.P446S  
p.P90S  
p.Q139\*  
p.G220D  
p.A498V  
p.L517L  
p.V21V  
p.S85L  
p.A100T

p.G279D  
p.A621A  
p.G1128E  
p.S356L

p.L1164L  
p.A829V  
p.S20F

p.L701F  
p.G75E  
p.W316\*  
p.E602E  
p.E229K  
p.S577S  
p.E290K  
p.I382I  
p.I90I  
p.G561R  
p.F1266F

p.A316A  
p.S3202R  
p.R33K  
p.E13709K

p.F168F

p.S56S

p.P323S  
p.P592L  
p.S8S

p.Q1053K  
p.P291S  
p.R524\*  
p.G724G  
p.S544F  
p.Q607L  
p.E478K  
p.Q457\*  
p.R410W  
p.S39S  
p.E147K  
p.S3395L  
p.S437S

p.G2075R  
p.T506T

p.K289K  
p.S50F  
p.V664M  
p.M352I  
p.R75R  
p.P529P

p.E421K

p.A951A  
p.F154F  
p.D368\_splice  
p.D1270N

p.I344I  
p.E13479K  
p.G953\_splice  
p.R704R  
p.W114\*  
p.P108S

p.G147E  
p.R118R

p.I72I  
p.E722\*

p.S693L

p.E705E  
p.M93I  
p.G355R  
p.R559K  
p.P445L  
p.K491E

p.K342E  
p.A485V  
p.E491K  
p.R293C  
p.S227F  
p.F354F  
p.G13R  
p.P301L  
p.E513K  
p.F2762F  
p.I293I  
p.P44S  
p.T770T  
p.R71W  
p.K255\_splice  
p.F569F  
p.R145\*  
p.D955N  
p.V336A  
p.P384S  
p.N43I

p.P397L  
p.K328T  
p.P2032L  
p.M1767I  
p.D1199N  
p.E566K

p.E192K  
p.F838F  
p.A172A  
p.G1543E  
p.R325Q  
p.N996T  
p.P961L  
p.F267F  
p.T800M  
p.V592V  
p.S171N  
p.G166E  
p.A119A

p.V62I  
p.R253C  
p.M69I

p.Y330F

p.S1326L

p.R304fs  
p.E101fs  
p.S507fs  
p.P789fs

p.LKCKMHFDG1013del

p.KD115del

p.S167fs  
p.F124fs  
p.E273fs  
p.S192fs

p.KPYA1632del

p.R754fs  
p.V87fs  
p.I1404fs  
p.R117fs  
p.I647I  
p.G239R  
p.F140F  
p.L3521L  
p.E866K  
p.L76L



p.P223L  
p.G513R  
p.F806L  
p.E133K  
p.K1012K  
p.P166P

p.G1807E  
p.L81F  
p.R638Q

p.G1491R

p.P115L  
p.T1246T  
p.P458S

p.A557V

p.S379F  
p.L1052F

p.P139S

p.P224S  
p.E177E  
p.G657E

p.G569S  
p.G442E  
p.E602K  
p.D326N  
p.S609F  
p.W303\*  
p.Q376\*  
p.E168K  
p.V321I  
p.Q199Q  
p.S4075L  
p.F81F  
p.I94I  
p.P1535S

p.P1973S  
p.D108N  
p.E541K

p.G188\_splice

p.D1473N  
p.L1271L  
p.G497E  
p.R43R  
p.A4A  
p.F527Y  
p.R235R  
p.F121F  
p.S1929F  
p.S79F  
p.L81F  
p.W477\*  
p.R415Q  
p.F810L  
p.P199L  
p.L21552F  
p.P568P  
p.G91R  
p.P47L  
p.E689K  
p.R128C

p.G443R  
p.S268F  
p.H27H  
p.E377K

p.G212D  
p.G10E  
p.S138F  
p.E291K  
p.I221I  
p.G270E  
p.P68P  
p.V3111V  
p.S276F  
p.L176F

p.A483V  
p.S462F  
p.G882E  
p.K647K  
p.L270F  
p.Q205Q  
p.V58V  
p.K604I  
p.G6317R  
p.F527F  
p.R174Q  
p.P1075P  
p.R406K  
p.P626S

p.E763\_splice  
p.H2256Y  
p.L763L  
p.P647S  
p.F4515F

p.P180S  
p.V622V  
p.L372L  
p.I87I  
p.P266L  
p.K80K  
p.Q51\*  
p.S88F  
p.P361S  
p.D10N  
p.R42\_splice  
p.E605K  
p.R1001K  
p.P40S  
p.R368K

p.E637K

p.P172L

p.G1033E

p.L579L

p.K363K

p.I90I

p.L410S

p.G1183\_splice

p.E537E

p.R240R

p.E405K

p.M1I

p.P88L

p.H18Y

p.Q231Q

p.G223E

p.H436Y

p.R269C

p.R61\*

p.R600C

p.S82F

p.E574E

p.T837T

p.C523W

p.E111E

p.I195M

p.I623I

p.P980S

p.P2947L

p.R1618R

p.P321S

p.S113F

p.H123Y

p.F255F

p.P572S

p.R293C  
p.A2117A  
p.G672D  
p.S120S  
p.R243Q  
p.L307F

p.A454V  
p.P1740P  
p.P141P

p.G86E  
p.R221K  
p.E82K  
p.F260F  
p.I193I  
p.F209F

p.G267R  
p.G458E  
p.A43T

p.E57\_splice  
p.E50K  
p.P570L

p.E161G  
p.T296\_splice

p.L849L  
p.M142I  
p.Y652H  
p.L238L  
p.S422S  
p.M80I  
p.S167L  
p.R356R  
p.R995K  
p.L560L

p.L42L

p.M67I

p.S5253F

p.R125C

p.L248F

p.L2510I

p.T4425T

p.T889T

p.W184\*

p.Y1050N

p.D415N

p.H869Y

p.E522K

p.V167V

p.Q285\*

p.E27K

p.E1011K

p.R289C

p.F187F

p.E383K

p.M580T

p.A800A

p.S500S

p.E94K

p.S1604\_splice

p.T633I

p.R375Q

p.S42F  
p.S618L  
p.P451L  
p.E151K  
p.P619S  
p.A353A  
p.E713K  
p.P123L  
p.E354E  
p.P43S  
p.E310K  
p.F1688L  
p.F658Y  
p.S999L

p.R491R

p.P269S  
p.A1669V

p.D293N  
p.S289S  
p.F1294F  
p.S202F  
p.N1062N  
p.E332K  
p.R707R

p.S1778C

p.V323V

p.P84S  
p.S1859S  
p.G1014E  
p.G540E  
p.E46E

p.G1165R

p.D132N  
p.E133K

p.K246K  
p.I571I  
p.I384I  
p.K698N  
p.K751K  
p.L268L  
p.P135L  
p.L328F  
p.Y99H  
p.V356M

p.R61Q  
p.R169Q  
p.G466R  
p.I19I  
p.G207E  
p.V63I  
p.F237F  
p.A158V  
p.E383K  
p.E1136K  
p.L1666L  
p.N395I

p.P96L

p.K119T  
p.S182Y  
p.Q19Q  
p.S322S  
p.E477D  
p.G637E  
p.E247K  
p.R202K  
p.R57Q  
p.G947E  
p.D896N  
p.P96P  
p.T93T  
p.R146R



p.V213V  
p.V254V

p.S85S  
p.E884K  
p.D506N  
p.S808\*  
p.E398K  
p.V185\_splice  
p.R44C  
p.F126F  
p.H1649Y  
p.A207A

p.H411Y  
p.S233N

p.S96S  
p.P710L  
p.G7S  
p.L489P  
p.D431N  
p.L554L  
p.G1266E  
p.R1393Q  
p.M1235I  
p.P818S  
p.S368F

p.S571F  
p.E695K  
p.Q40Q  
p.S234F  
p.S21L  
p.A15A  
p.L76L  
p.V1725V  
p.S1158S

p.D425N  
p.P1203S  
p.G55E

p.H197Y

p.L58L  
p.P183L  
p.E1016K  
p.V71A  
p.S6033S

p.E438K  
p.D459N

p.A377A  
p.L196L  
p.Q209K  
p.G77R  
p.P692S  
p.W265\*

p.R643Q  
p.G312E

p.R47G  
p.S545I  
p.E152K  
p.E45K

p.R5788K  
p.P163S  
p.S200S  
p.S1195F  
p.E1174\_splice

p.P68S  
p.K850K  
p.G204R

p.S179S  
p.Q1074\*  
p.E1070K  
p.S1983F

p.S65F

p.L450F  
p.P1377L  
p.L281F  
p.G508D  
p.S197F

p.S374F  
p.F206F  
p.F1063F  
p.E1000K

p.Q453K  
p.H395H  
p.D252N  
p.G41E  
p.G12R  
p.M144I  
p.M97R  
p.S623F  
p.G616E

p.D2126N  
p.D131N  
p.E194E

p.L5191L  
p.P55L  
p.E84D  
p.W407\*  
p.P322S  
p.P536S  
p.P288P  
p.S224S

p.D796N  
p.P404S  
p.P219S  
p.V233V  
p.E402K  
p.S596S  
p.W497\*  
p.F54F  
p.P1375A

p.F100F

p.L798F

p.P212L

p.K499T

p.G329\_splice

p.E337\_splice

p.E567E

p.F92Y

p.F2611F

p.R423\_splice

p.G642R

p.P816S

p.S1118S

p.S561S

p.R104R

p.T546A

p.E319K

p.A127V

p.S292F

p.S990F

p.I328I

p.V480L

p.F2261F

p.G562E

p.L246V

p.F1264I

p.R630W

p.P463S

p.R249W  
p.S868F  
p.W874L  
p.D50N  
p.N2801H  
p.E201K

p.L653L

p.S453F  
p.G283S  
p.P320L

p.P1756L  
p.D128N

p.L1417L  
p.M549I

p.R112K

p.S16F

p.R73S  
p.G369R  
p.S192R  
p.P450L

p.G627R  
p.F299F  
p.P1391S  
p.D614N  
p.H314Y  
p.R47C  
p.E824K  
p.S205F

p.R481Q  
p.L2203L  
p.P408S  
p.P761P  
p.F19L  
p.G124E  
p.G227E  
p.P314L

p.S280F  
p.F677L

p.E513K  
p.M72I  
p.L773L  
p.E224E  
p.G487E  
p.E354K  
p.T816S  
p.L1005H  
p.G310G  
p.S386F  
p.R327\_splice  
p.E180K  
p.D113N  
p.Q443Q  
p.H1075Q

p.E11E

p.G485E  
p.P180P  
p.G13E  
p.S254F  
p.V115V  
p.S350S  
p.P666P  
p.P889S  
p.S422F  
p.R284S  
p.I1359I  
p.F191F

p.S20317S  
p.T474A  
p.H40Y  
p.F439L  
p.G261E  
p.W183\*

p.H103Y  
p.I263I  
p.E1704K  
p.F351F  
p.N396I  
p.A851A  
p.D647G  
p.L586F  
p.G616S  
p.E132E  
p.T321I  
p.V320V  
p.G853G  
p.T245S

p.S124S

p.T416I  
p.R263R

p.I265I  
p.R818R  
p.G1034S  
p.F463F

p.E653K  
p.A32T

p.E526K  
p.Q1932E  
p.G549\_splice  
p.F718F  
p.P385L

p.T1033T  
p.R91Q

p.S306F  
p.P148S  
p.E2K  
p.F698F  
p.E42K  
p.E104K  
p.D522N  
p.G528E  
p.E552K  
p.S149S  
p.P222L

p.G143E

p.K54K  
p.Q292R  
p.S406S  
p.R334K  
p.E242K  
p.P439S

p.P1019P  
p.A413A

p.E224E  
p.E32K  
p.A846V  
p.E130K  
p.F7716F  
p.D349N  
p.G109E  
p.G193E  
p.E1028K  
p.G782G

p.R683K  
p.S12L



p.G784E  
p.R574Q

p.K574K  
p.K10335K

p.Q1274\*

p.Y147\*

p.E1171A  
p.L122L  
p.G382R  
p.G532E  
p.F556I

p.G65D  
p.Q529\*  
p.L33L  
p.P89S  
p.L338L  
p.S122S  
p.E549K  
p.S3891F  
p.P12S  
p.D50D  
p.F377F  
p.L127L  
p.E1272K  
p.L515L  
p.E480A  
p.I123I

p.F61F  
p.S85F  
p.E246K  
p.V278V  
p.E629K

p.A827\_splice  
p.Q526K

p.R707K  
p.G239R  
p.S197S  
p.F738F  
p.R129R  
p.G112E  
p.N738H

p.E176K  
p.H227Y  
p.A340T  
p.T501T  
p.F431C

p.I218I

p.E202K

p.G2555E  
p.L21552P  
p.R1158\*  
p.P342P  
p.E116K  
p.P150P  
p.I457I

p.P171S  
p.R158C  
p.D294D  
p.E982K  
p.P800S  
p.G502E  
p.L63V  
p.G477R  
p.S76L

p.E72K  
p.S215P  
p.L816P  
p.D27N  
p.R243K  
p.G526E

p.P140P  
p.I76I  
p.D535N

p.P1009P  
p.G103D  
p.G944G  
p.W224\*

p.R170Q  
p.P638S  
p.A16A  
p.A27A  
p.L284H

p.S272F  
p.G56G  
p.S348F  
p.D1107N  
p.V632\_splice  
p.L48L  
p.A313A  
p.V313M  
p.G173E  
p.E77K

p.R499K  
p.P741S  
p.S141S  
p.R543C  
p.G2002S  
p.P93S  
p.R337Q  
p.W325\*  
p.F241F  
p.M291I  
p.P3505S

p.L503F  
p.E101E  
p.A123V  
p.E277K  
p.R246R

p.R223K  
p.L312F  
p.G139G  
p.S155F  
p.E243K  
p.R500R  
p.P390L  
p.P439P  
p.S37S  
p.A215A  
p.L138L

p.T309T

p.E78K  
p.L30L  
p.R978\*  
p.N194I  
p.V160I  
p.V459A

p.D355N

p.R1669C  
p.S13L  
p.Q115Q  
p.G322E

p.R652Q  
p.D284G

p.K216T

p.E681K  
p.M39I  
p.P2161L

p.S202F

p.E494\_splice  
p.I453I  
p.I878I

p.E395K

p.S78F

p.P132L

p.Q431Q

p.S121S

p.K581E

p.L30L

p.S427L

p.R667W

p.Q614\*

p.P147L

p.L246F

p.G369E

p.P101\_splice

p.P1917L

p.P303L

p.R8\*

p.R1094Q

p.E536K

p.V227V

p.G180R

p.P673L

p.R290R

p.K1149K

p.M291K

p.R334Q

p.S105S

p.F178F

p.E74K

p.E1032K

p.D670N

p.L338L

p.V346V

p.G704C

p.Q311\*

p.I198I

p.D108N

p.G392G

p.K1098E

p.D43N  
p.L105L  
p.G346D

p.E957K  
p.E56K  
p.S203S  
p.P384L  
p.P384S  
p.S67A  
p.S7076S

p.P237P  
p.D468H  
p.Y364\*  
p.L26L  
p.R151S  
p.H235P  
p.H7717Y  
p.R484R  
p.P441T  
p.P55S  
p.P109L  
p.G4675E  
p.I68I  
p.A526V

p.R255Q  
p.K309K  
p.L733L  
p.S670S  
p.D282N  
p.S1313S  
p.L411F

p.P161L  
p.L298L  
p.S294S  
p.G847E  
p.L51S

p.P255A  
p.P145S  
p.P75P  
p.Q8\*  
p.V115M  
p.S7L  
p.G232D

p.P263S  
p.S357S

p.G137E  
p.K429K  
p.L24L  
p.P53L  
p.A692V  
p.V610V  
p.S829Y  
p.S443F  
p.V1081V  
p.S49F  
p.Q249Q

p.V1379V  
p.S88L  
p.L178L  
p.G266E  
p.S37L  
p.S718Y  
p.K1998K

p.G81D  
p.I84I  
p.S5253S  
p.G272R

p.P758S  
p.L724F

p.M342I  
p.F103F

p.F223F

p.T518I

p.G205E

p.G341E

p.P170L

p.V27V

p.E83K

p.Q300Q

p.R55\*

p.S353S

p.T192T

p.G1497G

p.P267L

p.Q723\*

p.G135G

p.L82F

p.G619\_splice

p.I1939M

p.L431F

p.F355F

p.T88T

p.F316F

p.P282P

p.Q94\*

p.G118E

p.P180S

p.E192K

p.L107L

p.E201K

p.E205K

p.R410R

p.R132R

p.R465R

p.G5369E

p.L22L

p.R817Q

p.D196D



p.R1782R  
p.L615L  
p.L553L  
p.E272K  
p.S9F  
p.L72L  
p.I6117I  
p.P132L  
p.G6R  
p.L477L  
p.F215F  
p.K717K  
p.F16F  
p.G138G  
p.P273L

p.T672T  
p.F3321F  
p.D1522N  
p.A393A  
p.S106L  
p.P26S  
p.T1404T  
p.R15W  
p.P983S  
p.P302S  
p.D59N

p.L34L  
p.S765F

p.L221L  
p.L658L  
p.P701S  
p.P152L  
p.S340L  
p.E7469K  
p.D1625N  
p.P538S  
p.R325K  
p.E922K  
p.A179V

p.E467K

p.S41F  
p.R2543\*

p.E189K

p.N249N  
p.P451S  
p.S94F  
p.K546E  
p.Q426Q  
p.E627K  
p.P84S  
p.A574T  
p.T200T  
p.E167K

p.G1299E  
p.P577L  
p.H1400Y  
p.I1037I  
p.R221R  
p.P591L  
p.P218P

p.H179Y  
p.H303H  
p.L70\_splice  
p.D521G  
p.S307L  
p.R300H

p.R1934C  
p.P598L

p.R284K  
p.K132\_splice  
p.I561I  
p.E961E  
p.H1351Y

p.A311A  
p.D463N  
p.Q71Q  
p.G363E  
p.K1537K  
p.S60S  
p.F300I  
p.R46Q  
p.P1088L  
p.N80N  
p.S1826F  
p.Q141\*  
p.S215L  
p.L175F  
p.N921K  
p.G2098E

p.G72E  
p.G698E  
p.L82L  
p.Y226Y  
p.P30S  
p.K383\*  
p.A116T  
p.H1082Y  
p.S103F

p.H390Y  
p.G390S  
p.Q54\*

p.F424F  
p.P51P  
p.W497\*  
p.P179L  
p.D940N  
p.G161R  
p.M406I  
p.S279F  
p.L647L  
p.H155Y

p.R12R

p.R727\_splice

p.K13\*

p.G191G

p.H334Y

p.P144P

p.R192\_splice

p.E32K

p.L650F

p.S257P

p.D26N

p.Q364\_splice

p.E801K

p.P577S

p.G485E

p.I183I

p.R35Q

p.S124F

p.D393N

p.I796I

p.F332F

p.E38K

p.H155Y

p.E18K

p.D206\_splice

p.R277R

p.W277\*

p.G86E

p.V119V

p.P586S

p.S225F

p.P991P

p.G2109D

p.R155R

p.E426K

p.L115L

p.L33L  
p.E1826\*  
p.G114R  
p.R570C  
p.S1170C  
p.R146Q  
p.T79T

p.P307L  
p.S504C  
p.E1179\_splice

p.E414\*  
p.F413F  
p.R20Q  
p.E3339K  
p.S94S  
p.P72P  
p.G471E  
p.S1387F  
p.H1770Y  
p.K87N

p.D417D  
p.F158F  
p.D4423Y  
p.R275C  
p.H268Y  
p.P638L  
p.M1I  
p.A1144V

p.E103K

p.Q161\_splice  
p.L85L

p.R226C  
p.P591P  
p.G549\_splice

p.R994W

p.P68L

p.L142L

p.D496N

p.I1078I

p.E244K

p.R234R

p.P454S

p.L327L

p.P392L

p.L205L

p.W177\_splice

p.L162L

p.G2258R

p.S1209S

p.K39\_splice

p.V147V

p.E471K

p.E83K

p.P267P

p.L243L

p.S202L

p.P71L

p.R315Q

p.S41S

p.G206E

p.P213R

p.S102R

p.K104N

p.E2231K

p.P453S

p.P472P

p.S113F  
p.V129I  
p.R56W  
p.T151T

p.G173E  
p.G116E  
p.L388L  
p.L110F  
p.S273F  
p.G363R

p.P1802S  
p.T686T  
p.T266A  
p.S291P

p.V223V  
p.K967K  
p.Q125\*  
p.E27K  
p.G561E

p.G654E

p.W207\*  
p.E337K  
p.I178I

p.L1573M  
p.R1008K  
p.G61R  
p.Q178\*  
p.G467G  
p.R169W

p.P276L  
p.G935S  
p.G350D  
p.E13E  
p.C246C  
p.T398T

p.L775F

p.H1103Y

p.P136S

p.K766K

p.D882N

p.R327\_splice

p.V414M

p.E605K

p.A47T

p.G289G

p.L226L

p.L256L

p.I112I

p.P595S

p.P630S

p.G561R

p.E363K

p.L575L

p.P407S

p.K229K

p.R336R

p.E1499K

p.G200E

p.F269S

p.S720S

p.R578R

p.R730C

p.E437E

p.P251S

p.G103S

p.G182E

p.E625\*

p.G226S

p.P182S



p.E75K  
p.F188F

p.K576\*  
p.S400F

p.S88S  
p.S460F

p.A816T  
p.P250L  
p.P146L  
p.G525R  
p.E865K  
p.E360E

p.R513K  
p.R711R  
p.P707S  
p.P782L  
p.A204T  
p.P415H  
p.R88Q

p.G623S  
p.V185M

p.R56C  
p.A366S  
p.Y122H

p.S351S  
p.H421Y  
p.G420G  
p.P1200S  
p.P274L  
p.D539N

p.E1521K

p.L3346L

p.P402L

p.R2003K

p.V440V

p.G1421R

p.G173E

p.L70L

p.A211A

p.R367K

p.R102Q

p.I461I

p.R459R

p.G69E

p.S36N

p.G352A

p.R782\*

p.S1002S

p.S286S

p.S244F

p.T886T

p.Q115Q

p.G124R

p.I44I

p.V370\_splice

p.V927V

p.I712I

p.F238L

p.G410G

p.V1120I

p.A357V

p.S552F

p.S120\_splice

p.L19M

p.F12F

p.K406N  
p.G184S  
p.S443F

p.R419W

p.R343Q  
p.A440V  
p.A81T  
p.P220S  
p.D324D  
p.S1170S  
p.A75V  
p.F32F  
p.A526A  
p.V770V  
p.L220L  
p.E269E  
p.G268E

p.L156L  
p.P191P  
p.P1871S  
p.H460H

p.K1007N  
p.E242K  
p.I327I  
p.K1082\_splice  
p.E423K

p.T686I  
p.P60S

p.L1995L  
p.V462I  
p.F182F  
p.K760K

p.P903S  
p.G186S

p.P689L

p.L17L

p.\*332\*  
p.V505V

p.F164F  
p.K245K

p.P106P  
p.I239L

p.G622E

p.G55R  
p.T195T  
p.P49P

p.I28I

p.R442C  
p.A472A

p.R147R  
p.K500K  
p.A1005A  
p.M4I  
p.R192\_splice  
p.Q856\_splice

p.A261A  
p.E173K  
p.R290Q  
p.Y482D  
p.K830K  
p.M132I

p.P385S

p.T65T  
p.E116K  
p.L266L  
p.S247S

p.R789Q  
p.K306R  
p.R1782Q  
p.W30\*  
p.W169\_splice  
p.S722L

p.P396P  
p.F34I  
p.E335E  
p.S80S  
p.G187S  
p.I342I  
p.I123I  
p.P1333P  
p.F858F  
p.P1252S  
p.T1255T  
p.R325S  
p.R336R  
p.L878L  
p.S2089F  
p.M629I

p.I524I  
p.G173R  
p.P839S  
p.P1371R  
p.I115I  
p.A73V  
p.W2566\*

p.R1201K

p.V613V  
p.P328L  
p.D1097N

p.P1375L  
p.R240R  
p.E1404K

p.R228C  
p.S233S  
p.E20D  
p.S27S

p.L739L  
p.A642D  
p.I3777I

p.E872K  
p.G606E  
p.G887G  
p.G372R  
p.F232F

p.K608K

p.F791I  
p.W165\*  
p.R761R  
p.A65V  
p.P230S  
p.D99H

p.A267T  
p.E127K  
p.D362N  
p.D1305N  
p.F552F

p.S450S  
p.P2589L

p.R2972Q  
p.G45E

p.S2448\*  
p.I24I

p.R359Q

p.G330G

p.F257F

p.E1696K

p.I260I

p.P297S

p.S299F

p.N482D

p.L1577L

p.I1008I

p.P43L

p.T869I

p.E269K

p.R400C

p.T326T

p.E285K

p.D16N

p.P26P

p.Q1051\*

p.Y129N

p.V1263V

p.K2508Q

p.T321T

p.S7L

p.D1288N

p.P448P

p.A71A

p.N27N

p.P58S

p.G100E

p.R287Q

p.H414Y

p.R581K

p.V202V

p.F166F

p.S1241F

p.E1260\_splice

p.R61Q

p.S130F

p.R121C

p.W664\*

p.D256N

p.L498L

p.Y94N

p.F157F

p.S146S

p.T2220I

p.F635F

p.S415L

p.E193K

p.T368I

p.I65I

p.L271L

p.P437L

p.R1188W

p.M294I

p.P465S

p.P337S

p.L93L

p.S159F

p.C57Y



p.K604E  
p.F264S

p.E247K  
p.G57R

p.G206G  
p.P391S  
p.E311K  
p.P227S  
p.R44W  
p.R1349C  
p.G620E  
p.A399G  
p.Q23R  
p.I334I  
p.F1041F  
p.S391F  
p.H568Y  
p.M2043I  
p.S262L

p.G11E  
p.E321K  
p.A399A  
p.D1812E  
p.A61T

p.S36S

p.G380R  
p.L1172L

p.H60Y  
p.R234R  
p.S231L  
p.L340L  
p.G1962E  
p.T170T  
p.N1034Y  
p.V392V

p.R854R  
p.P460L  
p.I685I  
p.F496Y

p.L201L  
p.M321I

p.V1121A  
p.L475L  
p.L89L  
p.P17L  
p.S791L  
p.W3633\*  
p.G506S  
p.P326S  
p.S64F  
p.P313L  
p.P1084S  
p.R304C  
p.G117R  
p.E286K

p.I337I  
p.R3327K  
p.S1127L  
p.P142L

p.G14485V  
p.P1282L  
p.I128I  
p.R282C  
p.S429S  
p.S95L  
p.W184\*  
p.R98Q

p.F421F  
p.F369F  
p.F661F

p.G1025E

p.I799I

p.E239K

p.G2379E

p.E2278K

p.S1513F

p.R533\*

p.S968N

p.D85N

p.A434V

p.P22L

p.F66F

p.I287\_splice

p.H421Y

p.Q111\*

p.P10098S

p.G1299R

p.E182K

p.I68I

p.G1491E

p.S356F

p.L69L

p.D24N

p.P213S

p.S827P

p.P90S

p.R319\*

p.L57L

p.T231I

p.D489N

p.V11V

p.I225I

p.G709\_splice

p.S115L

p.P1947L

p.E992K  
p.E332K  
p.E183K  
p.I14023I

p.A888A  
p.F179\_splice  
p.N294K

p.R2981K

p.T1955I  
p.S67F

p.R831Q

p.P1413S  
p.R45Q  
p.R423\_splice  
p.S969F  
p.P744S  
p.R175K

p.T972T  
p.H64Y  
p.R1302Q

p.S344L  
p.R573\*

p.G105G  
p.A399T  
p.S3035F  
p.E365K  
p.N140N  
p.T21K

p.E108G

p.S73F  
p.F165F

p.G504E  
p.R186R  
p.V346G

p.G85R

p.P257S  
p.S226S  
p.S690F  
p.S1534S

p.W464\*  
p.K48K

p.Q473\*  
p.K157K  
p.T144A  
p.R785R  
p.R1664R  
p.F151F  
p.A840V  
p.L963L  
p.R357Q

p.W577\*  
p.T198T  
p.V309M  
p.S1197S  
p.P104S  
p.L250R  
p.P193L

p.D652N  
p.I98I  
p.E494\_splice  
p.S371S

p.A215V  
p.G304E

p.P328S  
p.S660F

p.F1226F  
p.R658C  
p.W874\*  
p.P399L  
p.C64\*  
p.R1180L  
p.L121L  
p.I185I

p.L365F

p.G1437E  
p.P284P

p.G44R

p.A336A  
p.G63E

p.W103\*  
p.T563T

p.P54S  
p.E934\_splice  
p.R139R  
p.S605F  
p.G926R  
p.P46S  
p.K384K  
p.D1070N  
p.R440\*  
p.L152F

p.A96V  
p.G514R

p.E54E

p.S192F  
p.F2012F  
p.E581K  
p.Q915\*  
p.D252N  
p.P490S

p.F523F  
p.P3426P  
p.F32485F  
p.G106G  
p.P1335S  
p.I177I

p.G1525E  
p.R125Q  
p.P145L  
p.F493F  
p.P4398L  
p.R633C  
p.S353F

p.E467K  
p.P124S  
p.M1776I  
p.R279\*

p.G899R  
p.S156S

p.M100I

p.K423K  
p.S22S  
p.Q468H  
p.R2592R  
p.Q427Q  
p.S16S

p.E584K

p.E879K

p.S32F  
p.S414L  
p.R1913C  
p.F27F  
p.E1019E  
p.R1122Q  
p.H264\_splice  
p.P307L  
p.S406F

p.V368V  
p.E485E  
p.A24S  
p.F13F  
p.V679V  
p.I133I  
p.S55S

p.G97D  
p.W167\*

p.S5301L  
p.L350L  
p.G85R  
p.G128S  
p.R1121R  
p.L829L  
p.P326R  
p.P182S  
p.D98N  
p.R624C

p.K77E  
p.G471\_splice  
p.V339V  
p.G162G  
p.S42F  
p.F918F  
p.W2324\*  
p.P70S  
p.W703\*  
p.N327N  
p.R390Q



p.L33L

p.R385Q

p.Y483Y

p.S344L

p.P365S

p.S515F

p.P271L

p.Q10Q

p.V496V

p.S809Y

p.D409N

p.P624S

p.E267\*

p.L5L

p.P454S

p.L507F

p.V449V

p.G32E

p.R287R

p.E327K

p.P1695S

p.G47\_splice

p.I332V

p.I267I

p.L205F

p.H192Y

p.S557F

p.P449L

p.W263\*

p.L1105L

p.T33T

p.D325\_splice

p.G221G

p.F188F

p.F154F

p.I110I

p.P368L

p.R486K

p.P108S

p.Q424Q  
p.P290L  
p.A479V  
p.R738C  
p.G158\_splice

p.P158S  
p.G131E

p.S903F  
p.S218S  
p.L36F

p.T2119T  
p.V511V  
p.R270R  
p.L18956L  
p.F152F

p.P57L

p.E2420K  
p.D620N  
p.R273Q  
p.G472S  
p.D552N  
p.W151\*

p.E221K  
p.P501L  
p.P39S  
p.E384K

p.P1236L  
p.G175E  
p.P213L  
p.P30L  
p.S480F

p.S182F  
p.P21S  
p.D74N  
p.N77D

p.V148V  
p.P141S  
p.P112S  
p.V73M  
p.E60E  
p.R523\_splice  
p.E302K  
p.T7T  
p.W256\*  
p.R721K

p.Q278\*  
p.I163I  
p.E763K  
p.G424D  
p.P193L  
p.P8280S  
p.K762E  
p.R676C  
p.P149L  
p.S141F  
p.G1034D  
p.E92K  
p.A1068A  
p.S304L  
p.V332V

p.V448V  
p.S2413F  
p.D1346N  
p.P528S

p.E467K

p.Q1006\*  
p.G59G  
p.E838D

p.G74G  
p.E407K  
p.P247S

p.G692R

p.R1674K  
p.R29K  
p.A50A  
p.\*1173\*  
p.S336L  
p.L96L  
p.S5441L  
p.F3167F  
p.I887N  
p.S1181G  
p.P177P

p.R1079Q  
p.E135K  
p.D292N  
p.E280K

p.D801N  
p.I261T  
p.E68Q  
p.F220F

p.E47K  
p.G5E

p.G185E  
p.P1350L  
p.S365S

p.R2548Q  
p.E868K  
p.K168N  
p.L450L

p.K146K  
p.W158\*

p.I380I

p.R175Q  
p.S580F  
p.I96I

p.F315F  
p.P458L  
p.W43\*  
p.S4564S  
p.R1060C  
p.S742S

p.L977L  
p.L53L  
p.E1794K  
p.E124K

p.P405L  
p.I141I

p.E389E  
p.F5F

p.P666L  
p.P125P

p.S607F

p.Q72Q  
p.F343F  
p.P94L  
p.R375\_splice  
p.P200S  
p.S6190F

p.S325S

p.G649G  
p.R183Q

p.F209F  
p.H559Y  
p.F1081F

p.R499R

p.E88K  
p.P316S  
p.R62C  
p.G53R  
p.D393N  
p.S442L  
p.L215F  
p.F149F  
p.F362F  
p.D291N  
p.S444S

p.E799K  
p.G256E  
p.S1166S

p.L100L  
p.L121F  
p.S129F

p.G144G  
p.Q256\_splice  
p.L497L

p.T3913I  
p.P1943S  
p.R681C

p.P64L

p.L269L  
p.A57V  
p.G12E  
p.E437\*

p.K61K  
p.Q115H  
p.G482G  
p.P518L  
p.F543F  
p.D124N

p.R462C  
p.Q274Q  
p.R15K  
p.E624K  
p.F682F  
p.V140V  
p.A1243A  
p.S375S  
p.G63R  
p.R21W  
p.G40R

p.I273I

p.Q397\*

p.G417E  
p.P1096S  
p.G1747R  
p.P321L  
p.T319T  
p.P158S

p.E41K  
p.H1238H  
p.S1159F

p.R54C  
p.F182F  
p.I185I  
p.L480L  
p.P331S  
p.S181L  
p.R55\_splice

p.G622\_splice  
p.A1265\_splice  
p.W13\*  
p.G990S  
p.K1628\_splice  
p.P311S  
p.G92R  
p.V237V  
p.G1308S  
p.A145T

p.S145F  
p.R111C  
p.P58P  
p.P60L  
p.M238T  
p.L721F  
p.L163V  
p.E89K  
p.E203K  
p.P37L  
p.P681Q  
p.E893E  
p.P528L  
p.E119K  
p.L683L  
p.V325V  
p.G1064R  
p.P918S  
p.G96R

p.L367M  
p.L1005F

p.I372I  
p.G174E  
p.S83F  
p.S597F  
p.P351L  
p.S459F  
p.E120K  
p.I598I



p.E184K  
p.P292S  
p.K358K

p.W399\*  
p.S82F  
p.F3188F  
p.T431T

p.E1939K  
p.H237Y  
p.I201I  
p.N541H  
p.D468D  
p.G265R  
p.G1272E  
p.S866L  
p.P52P  
p.L267F

p.W703\*  
p.R141R  
p.D408N

p.I982I

p.R229K  
p.F435F  
p.P281P  
p.R240R  
p.F286F  
p.S70\_splice

p.I195I  
p.F569F  
p.R935\*  
p.P211L

p.G577E  
p.P239S  
p.P415S  
p.P87L  
p.H775Y  
p.W25633\*  
p.V42V  
p.S499F  
p.S104F  
p.R982\*  
p.L114L  
p.S1737S  
p.W1440\*  
p.V476\_splice  
p.N174N

p.R854K

p.L338L

p.P576L  
p.E67K  
p.I734I

p.C11G  
p.S1056F  
p.A346V  
p.P2395L  
p.I272I  
p.P17S  
p.P90L  
p.I372I

p.S25S  
p.S1187S

p.C29F  
p.S68S

p.K119R  
p.K188\_splice

p.G1087E  
p.P184L  
p.K76K  
p.I91I  
p.P209L  
p.F291F  
p.R177R

p.R169C

p.E333E  
p.S370Y  
p.T56T  
p.L414L  
p.S233F  
p.F182F  
p.S1124S  
p.R1218K  
p.E3049K

p.P7093S

p.D106N  
p.G142G  
p.R1750R

p.W685\_splice

p.Q97\*  
p.G197V  
p.P448S  
p.G93E  
p.L317L  
p.F641F

p.P351S  
p.S768F  
p.R6C  
p.R1010C

p.P32S

p.R1269H  
p.K38K

p.Y179N  
p.D4524N  
p.S202S  
p.S169S

p.E1249K  
p.H153Y  
p.G394E  
p.K194K  
p.R573\*  
p.E10444E  
p.S66L  
p.A3900A

p.S3767F  
p.R310M  
p.T94T  
p.Y29Y  
p.S137F  
p.D330N  
p.P369L  
p.S281S  
p.L1161F  
p.P179S

p.P460S

p.L1262F  
p.P685L  
p.E558K  
p.P272S  
p.A291\_splice  
p.Q182\*  
p.K128K  
p.A975V

p.E305E  
p.E2516\_splice

p.V601V  
p.P1240L

p.G125\_splice

p.P207L

p.F252F

p.L799L

p.Y672Y

p.E139K

p.R576R

p.N657Y

p.E108\*

p.E226\*

p.R369M

p.V50V

p.E31K

p.S568F

p.P299S

p.E481K

p.G608E

p.L419F

p.S458L

p.F941F

p.L75M

p.G1019E

p.E57D

p.R411\*

p.R1135W

p.P343L

p.K661K

p.Q619\*

p.R754R

p.P461S

p.G372E

p.G118R

p.P601L

p.R298Q

p.P74S

p.T651T

p.G832G

p.S131S

p.G77E

p.P342L

p.G607G

p.P232S

p.Q205Q

p.T244T

p.P824L

p.S477F

p.S414L

p.A310A

p.E129K

p.I3628I

p.S193F

p.V577M

p.I130N

p.G6E

p.L385L

p.R872W

p.Q118\*

p.F263F

p.P228L

p.V205V

p.F80F

p.G93E

p.G1736G

p.V74I

p.S310S

p.F773Y

p.L1317L

p.V159V  
p.P71S  
p.S1079F  
p.R513\*

p.S7S

p.S533S  
p.L441L  
p.F119F  
p.P437P  
p.D773N  
p.P223L

p.D215N  
p.T180T

p.R594C  
p.G639E  
p.S108S

p.P497S

p.L300F  
p.P384P

p.G714E  
p.M254I

p.Q157K  
p.G986E  
p.S232A  
p.E614K  
p.V434V

p.Y147C

p.K44T  
p.E110K  
p.I3121I  
p.D707\_splice  
p.D12N  
p.G147R  
p.G187D  
p.G205R  
p.R29R  
p.D122N  
p.P497L  
p.M680I

p.M196K  
p.V532V  
p.S442F  
p.A371A  
p.D138\_splice  
p.P13S  
p.H376Y  
p.R39R  
p.W504\*  
p.A2060V  
p.P80T  
p.P528L  
p.E503K  
p.G97S  
p.C191C

p.R692\*  
p.D335N  
p.H70\_splice  
p.R319Q  
p.D467N  
p.P514S  
p.L686L

p.G207E  
p.G223R

p.S313T  
p.P100L  
p.S183F



p.D64N

p.T134T

p.L72P

p.M1345I

p.P184P

p.E517E

p.L1512L

p.P659S

p.Q434\*

p.E1168E

p.Q122\*

p.I252I

p.P473L

p.G713E

p.F763F

p.A303A

p.G87G

p.L624L

p.P830S

p.P172L

p.P16L

p.P142S

p.F117F

p.P265L

p.P237S

p.G437E

p.K455K

p.I1078I

p.A67A

p.G469E

p.L188P

p.G17\_splice

p.I1259I

p.L415F

p.P217P

p.P516S  
p.Q35\*  
p.D206N

p.V918V  
p.G1074G

p.P45S  
p.K1246K

p.H184Y  
p.L15L  
p.L86L

p.G1429R  
p.R8Q  
p.I632I  
p.L307L  
p.P466S  
p.L594L

p.P130L  
p.P167L  
p.S118F

p.S1015A  
p.I583I

p.K4424T

p.S758F  
p.S391F  
p.P675A  
p.L102R

p.G136E  
p.Q813\*  
p.G1042S  
p.T81T  
p.S542F  
p.K272K  
p.A255A

p.L129L

p.V86V

p.G2242G

p.P34A

p.R413\_splice

p.I69I

p.M738I

p.L227F

p.E2654K

p.S1098F

p.P394P

p.E2567D

p.V34\_splice

p.A148A

p.P580L

p.G73R

p.S480P

p.G516R

p.H456Y

p.W303C

p.G430G

p.F540F

p.P578S

p.E86K

p.D174N

p.E40K

p.E42K

p.G3491E

p.L459L

p.P292L

p.P921L

p.D60N

p.E102K

p.K55R

p.Q2564\*  
p.I383I  
p.E488K  
p.E1540G  
p.P660S  
p.G272G

p.S700S  
p.E389K

p.P415P  
p.F1078S  
p.R278Q  
p.T932T  
p.K31K  
p.I760L  
p.D280N  
p.M30I  
p.P622L

p.L816L  
p.K312K  
p.F28F

p.E468K  
p.E115K  
p.L10L  
p.D291N  
p.I2060V  
p.L260L  
p.H809H  
p.E95E  
p.S212L  
p.M9365I  
p.P6462P  
p.A100A  
p.R295R

p.R43\_splice  
p.S148L  
p.E381K  
p.E92K

p.L952L  
p.F2338F  
p.V93V  
p.L729L

p.V245V  
p.Q195\*  
p.S1455S  
p.E698K  
p.E303\_splice  
p.F130L  
p.K567T  
p.Q629\_splice

p.G97E

p.Q932H  
p.R412\*  
p.S501F  
p.E375K  
p.D584H  
p.M213I  
p.I808L  
p.F517Y

p.Q590Q  
p.V615V  
p.P3239L  
p.I584I

p.A245V  
p.R450R  
p.T983A  
p.I45I  
p.D615N  
p.S318L  
p.L1079F  
p.E397K  
p.E489K  
p.E250\_splice  
p.P1612S

p.K598R

p.L192F  
p.L964L  
p.V1078G  
p.D174N  
p.H193N  
p.L757\_splice  
p.E4G  
p.P107L  
p.L373L  
p.E676K  
p.R299R  
p.F89F  
p.S1604\_splice

p.H186Y

p.H282Q  
p.K46K

p.K897K  
p.G300W  
p.V162V  
p.R54Q  
p.Q693\*  
p.P470S  
p.G52R  
p.E198K  
p.R141Q  
p.D142N  
p.P472L  
p.G77R  
p.E319K  
p.E339\_splice  
p.L51L  
p.S2994F  
p.S109F  
p.E400K  
p.E93E  
p.S120\_splice  
p.A386A  
p.L467L  
p.S583F

p.T488T  
p.T1092T  
p.P1943L

p.V250V  
p.P84L  
p.I295F  
p.P1710S  
p.G55G  
p.L97L  
p.P271L  
p.S232S

p.P1095S  
p.I75I  
p.S1791S  
p.S189F

p.A607T

p.L70L  
p.P437S

p.R232K

p.F2000F  
p.G752R  
p.G455S  
p.E1819K  
p.G93R  
p.E757K  
p.R99\*

p.P699P

p.Q2027\*  
p.R1959C  
p.S222S  
p.P246L  
p.M374I

p.P145L  
p.D45N  
p.V115I  
p.P219L  
p.S160L

p.S130F

p.E413K  
p.P296P  
p.M188I  
p.T226T  
p.F134F  
p.E477K  
p.P322S  
p.V5V  
p.L1770L  
p.K366\*

p.A91A  
p.M1452I  
p.S435L  
p.S638F  
p.T325T  
p.L916L  
p.I504I  
p.P2S

p.P1220P  
p.R221C  
p.F580F

p.G262R  
p.D499N  
p.G3E  
p.P259L

p.E86\*

p.P1095S  
p.S655S  
p.E137K



p.W59\*  
p.L66S  
p.L542L  
p.A120A

p.V136V  
p.G386E  
p.E282K

p.P276S  
p.S492F

p.D429N

p.R400Q  
p.L868L  
p.G814G  
p.P1718P  
p.A110A

p.T1404I  
p.G107E  
p.E53K  
p.S653F  
p.K226K  
p.R785C  
p.G2591R  
p.G220E  
p.S199F

p.G2E  
p.S376F  
p.S248F  
p.E318K

p.L49F  
p.I65I  
p.R1664Q  
p.L358\*

p.E469K

p.W1453\*  
p.G579R

p.T259I  
p.D218N  
p.I551I  
p.D1045N  
p.D208N  
p.F38Y  
p.R263R  
p.F394F

p.R5507R  
p.P380P

p.H938Y  
p.P618S  
p.P218S

p.S352S  
p.L61L

p.I482I  
p.E865K  
p.Y200Y  
p.G37D  
p.R246K  
p.S792S  
p.P41S  
p.D375N  
p.P580S  
p.R25R  
p.T432P

p.S480S  
p.G287E  
p.F188F  
p.E214K  
p.R167R  
p.D142N

p.I501I

p.T642T  
p.S1167L  
p.G788E

p.T245T  
p.P430\_splice  
p.G464R  
p.P535L  
p.P841S  
p.R48G

p.L674L  
p.I221I  
p.P865S  
p.D1364N  
p.D2235N  
p.Y1134Y  
p.S650L  
p.S60S  
p.R301W

p.P207P  
p.V13G  
p.G182C  
p.L267L  
p.L194L  
p.I94I  
p.N639K  
p.G290E

p.K658R  
p.F284F  
p.R48H  
p.G792E  
p.G189R  
p.G170E  
p.L28V

p.D413N

p.L67F  
p.R490R  
p.E1160K  
p.R1418C

p.R106R  
p.L2555L  
p.G800E  
p.A1351V  
p.G323E

p.V432V  
p.P129P  
p.S51S  
p.P239P  
p.W184\*  
p.L1204L  
p.L308L  
p.P830L

p.Q1216Q  
p.S259S  
p.R733Q  
p.P598P  
p.E813K  
p.I40I  
p.H348H

p.W369\*

p.R454K  
p.V537V  
p.E679K  
p.P94P  
p.P538S  
p.K1415K  
p.G186D  
p.G109R  
p.E392K  
p.M86I  
p.L343L  
p.L120F

p.T2630T  
p.L77L  
p.P1169S  
p.L4516F  
p.Y254H  
p.P705L  
p.G1272G  
p.P61S  
p.E150K  
p.E23Q  
p.R14K  
p.E552K  
p.R20R  
p.T87T  
p.L615L  
p.E329K

p.G128R  
p.R587\*  
p.W175\*  
p.R1397C  
p.K1412I  
p.P282P  
p.I126I

p.E14K

p.S10840S  
p.R4608Q  
p.K78E  
p.G325\_splice  
p.V74A  
p.E281K

p.G1301R

p.I104I  
p.P1277L  
p.F66F  
p.L586F  
p.A25\_splice  
p.S119F

p.T9T  
p.P370P  
p.P243S  
p.H385Y

p.L841L  
p.G78E

p.G868G  
p.R546K  
p.N164S  
p.E286K  
p.D100N  
p.G40E

p.S293N  
p.P237S  
p.F334F  
p.H465Y  
p.V39V  
p.E164E  
p.Q609\*  
p.R754C  
p.A420A  
p.E341K  
p.R366R  
p.G698R

p.G1074R  
p.E218K

p.P58L  
p.L565I  
p.P3242P  
p.G96G  
p.G160D  
p.F281F  
p.L660L  
p.K167R  
p.N78S

p.D353N

p.R246Q  
p.P61L  
p.S939S

p.E64K  
p.F963F  
p.S3075S  
p.P205P  
p.F339F  
p.L227L  
p.E1305K  
p.D956N

p.F41F  
p.S527F

p.L1046L

p.C47G  
p.L1082F  
p.G193E  
p.T2230T  
p.R1498K  
p.G74G  
p.S98F  
p.V194V  
p.E180K  
p.Q1236\*  
p.G312R  
p.I949I  
p.S414F

p.L323\*  
p.D8521N  
p.R81C  
p.R683L  
p.A83T  
p.S1290F

p.E79K  
p.N557S

p.A876V

p.L84L

p.M23I

p.S18F

p.G401R

p.L10R

p.S438L

p.P624P

p.P72L

p.G161\_splice

p.R637Q

p.G394R

p.D1441\_splice

p.I1588I

p.K199\*

p.F279L

p.E11K

p.T92T

p.P537L

p.E168K

p.L340F

p.P52S

p.V116I

p.S240F

p.N398S

p.L183L

p.V529V

p.L238L

p.P1613S

p.G542G



p.G120R

p.I273I  
p.I403I  
p.T184I  
p.R83W

p.M265I  
p.E289K  
p.R31W  
p.P263P  
p.M2183I  
p.G506D

p.E4498\_splice

p.K629K  
p.D498N  
p.R396C  
p.N96N

p.S220\_splice

p.G673E  
p.I781I

p.I76I  
p.L287L

p.R845\_splice

p.S382L

p.I306I  
p.R317R  
p.S323F  
p.E2444K  
p.P473S  
p.S633F

p.P203L  
p.Y40Y  
p.T130T  
p.G359E

p.S1860S  
p.S3120F  
p.Y692Y  
p.F1118F  
p.P129S  
p.G456E

p.R156Q  
p.Q230H  
p.F274C  
p.E200K  
p.S156F  
p.P660L  
p.R224R  
p.R1637K  
p.E804K  
p.L34L  
p.S220S  
p.K669K  
p.P389P  
p.F570L  
p.P137S

p.Q1727\*  
p.A39A  
p.D76N  
p.I720I

p.S854F  
p.P180P  
p.A228A  
p.E127K  
p.E939K  
p.L895P  
p.D408G  
p.G225E

p.D238N  
p.P13L

p.S55G  
p.P1307S

p.D898N  
p.F581F

p.A566V  
p.I975K  
p.S66L  
p.G64G  
p.L614L  
p.D165\_splice

p.R164Q  
p.S666\_splice  
p.F153F  
p.Q1063\*  
p.R2103R  
p.A60A

p.T2656I  
p.H330Y  
p.L124P  
p.L46L  
p.V564V  
p.E870K  
p.L812L

p.W262\*

p.E38K  
p.R1195\_splice  
p.E237K  
p.P560S  
p.S330N  
p.E310K  
p.G5G  
p.F1601F

p.P128L  
p.E987K  
p.C683C

p.E241K

p.G107E

p.D166N

p.T17T

p.S36S

p.G736R

p.L247L

p.G123E

p.L1994L

p.G462E

p.L188F

p.I29I

p.L756L

p.W1437\*

p.W262\*

p.T672I

p.K477K

p.T2247I

p.Q3Q

p.L41F

p.M1I

p.S379S

p.R73R

p.S310F

p.S306F

p.P238P

p.D657N

p.P624T

p.K527K

p.V1337V

p.D2839N

p.F128F

p.F160I  
p.P222P  
p.P1467S  
p.D232N  
p.A50A  
p.R70R  
p.Q855P  
p.L695F  
p.N683Y  
p.P50L  
p.R87R

p.G186R  
p.P142P

p.H468H

p.R226R

p.D1574N

p.S263F  
p.L114L  
p.G153R

p.I85I

p.E136K  
p.L886H  
p.Q87Q  
p.A346A  
p.S448L  
p.S347F  
p.G8E  
p.D474N  
p.V567L  
p.G690E

p.R361Q  
p.P272S  
p.V289V  
p.E220K

p.G899E  
p.P2381L  
p.I231I

p.R175Q

p.K119R  
p.P158L  
p.H929Y

p.P68L

p.P732P  
p.Q1126\*  
p.K235K  
p.G1132S  
p.G305E  
p.V5I

p.D1113N  
p.I47I  
p.A482V  
p.G507G

p.V462M  
p.R30R  
p.S2165L  
p.P65S  
p.R167K  
p.L151L  
p.P335L  
p.H475Y  
p.L79L  
p.M442I  
p.G102E  
p.S183F  
p.P108L  
p.V183V  
p.E2683\*

p.F1228F  
p.G637D  
p.R461C  
p.G399R  
p.P474L  
p.T9T  
p.F652F  
p.S78F  
p.S248S  
p.D177N  
p.N265\_splice  
p.R195C  
p.L642F

p.P614L  
p.I284I  
p.K93Q  
p.S360F  
p.S108F  
p.R217\*  
p.L540L  
p.T527T  
p.P977S  
p.R30C  
p.P1948S  
p.I229I  
p.Q423\*  
p.S5828F  
p.Q1205\*  
p.E99K  
p.E666K

p.R132C  
p.G311D  
p.P303P  
p.E222K

p.S809F  
p.P1075L

p.E81\*  
p.A123A  
p.A622V

p.F268F  
p.P304L  
p.R1155\*  
p.T83I  
p.R3749C

p.R711R  
p.G468E  
p.P77S

p.S224F

p.R327W  
p.D213N

p.K517\_splice  
p.L5862L  
p.T478T

p.F368I  
p.E241K  
p.H36Y  
p.I46I  
p.S1509F  
p.S292S  
p.K840\_splice  
p.P1974S  
p.L782F  
p.D63\_splice  
p.S419F  
p.R252Q

p.G74E  
p.M381I  
p.S74F  
p.R119Q  
p.Y639Y  
p.L643F  
p.N3N

p.P466L  
p.S388F  
p.S184F



p.P60P  
p.E65K

p.E88\*  
p.I133I  
p.A200A

p.S73S  
p.I184I  
p.F1871F  
p.E201E  
p.K465\*

p.V52M  
p.P472S  
p.F82F

p.P2739L  
p.D682N  
p.P283S  
p.P136S  
p.A1669A  
p.G36E  
p.S808F  
p.D1269N  
p.P172S  
p.I248I  
p.E610K  
p.F713F  
p.F453F

p.P129L  
p.R191\_splice

p.V289E  
p.E1380K  
p.E64K  
p.I1725V  
p.L148L

p.S440P

p.R121R  
p.S374P  
p.A245A  
p.P59L

p.L720L

p.E2852K  
p.P62S  
p.A848A  
p.T256T  
p.F3615F  
p.V749V

p.F179F

p.L312L

p.S121S  
p.L194L  
p.I351I  
p.F199F  
p.R295Q  
p.E333K  
p.P212P  
p.S355L  
p.V232V  
p.G534E  
p.G356R  
p.G386R

p.G427E  
p.A843V  
p.R373K  
p.K44K  
p.L1264L  
p.A627V  
p.S153F  
p.G25E  
p.S626F  
p.T1092I  
p.G12R  
p.R819Q

p.P44S  
p.G47\_splice

p.A3A  
p.P329L  
p.G95G  
p.Q25Q  
p.R14W  
p.I260I  
p.E269K  
p.R2146C  
p.K532N

p.G360E  
p.F741F  
p.F430F

p.S174S  
p.K253K  
p.E325K  
p.S293N  
p.I110I  
p.P1947S  
p.P322L  
p.E300E  
p.R194R  
p.I3146I  
p.G8651E  
p.E89K  
p.R883C  
p.F483fs

p.L10F  
p.P994P  
p.G1030S  
p.E196G  
p.F273F

p.R475W  
p.P569L  
p.F413F  
p.F139F  
p.I39I  
p.P232S

p.E598K  
p.G538G  
p.S431F  
p.G206D  
p.I213I  
p.P290L  
p.F264F  
p.R315R  
p.H400Y  
p.E302K  
p.P115L  
p.Q503\*  
p.D308D  
p.R444K  
p.D150N  
p.G103R  
p.R124K  
p.F413F  
p.E122K  
p.A1116A  
p.G1211S  
p.A14A  
p.E357K  
p.P150L  
p.A884A

p.E503K

p.F93F  
p.D157N  
p.P1653L  
p.Q762\*  
p.G242D  
p.P1309S  
p.D33N  
p.D33N  
p.R565Q  
p.A178A  
p.E133K  
p.S180F  
p.K1754Q  
p.Q621\*

p.M386I  
p.Q206Q  
p.V362V  
p.L945L  
p.V131G  
p.R262Q  
p.A1326T  
p.R312K  
p.S243S  
p.P915S  
p.R320R  
p.L123L  
p.P863L  
p.A621T  
p.L841F  
p.S72S  
p.S248F  
p.T90T  
p.N640S  
p.S399S  
p.L69L  
p.T155I  
p.K85K  
p.S147S  
p.L222L  
p.P260S  
p.S386S  
p.S2F  
p.Q61R  
p.S425P  
p.A56\_splice  
p.D578N  
p.P593L  
  
p.H604Y  
p.P257S  
p.S468F  
p.E1989K  
p.S138S  
p.V312F  
p.I332I  
  
p.F149F

p.P815L  
p.D311N  
p.T279T  
p.A262A  
p.Q525\*  
p.E64K  
p.L17L  
p.E25K  
p.R142W  
p.G817E  
p.S91F  
p.P502L  
p.V82V  
p.I275I  
p.L1190L

p.L436F  
p.W20\*  
p.E104\_splice

p.S297S  
p.V210A  
p.E2257K

p.R101K  
p.E230K

p.H537H  
p.E1541G

p.S1492L

p.P801S  
p.Q80\*  
p.M118I  
p.S213S  
p.S57L  
p.R271Q  
p.P165S

p.P750S  
p.F174L  
p.P380L

p.R746C  
p.G233E  
p.F298F  
p.S672L  
p.P11299L

p.L24Q  
p.P1235S  
p.Y96Y

p.S2124F  
p.F1458F  
p.R972\*  
p.W72\*

p.D143N  
p.A104A  
p.S427F  
p.F1168F  
p.R103Q  
p.P362S

p.G726E  
p.S2076S  
p.G1338\_splice  
p.E220\_splice  
p.E677K  
p.T96I  
p.R184R  
p.Q831Q  
p.Q289Q

p.S68S

p.E963K  
p.S877L  
p.R533C  
p.G1026E  
p.L610L

p.R435R  
p.I92I

p.M45I  
p.E1617K

p.I2593T

p.S765F  
p.L12L  
p.A132T  
p.Q380\*  
p.A15A  
p.N278S  
p.P54S  
p.G18R  
p.F1248F  
p.G305R

p.F5F  
p.P2227S  
p.E179K

p.T202K  
p.S526S  
p.Q330\*  
p.R377P  
p.F150F  
p.T245I  
p.I855I  
p.V96M  
p.S272L  
p.E552K  
p.A1262V  
p.E351K  
p.P486S

p.P45S  
p.S418L  
p.V29V  
p.S1054F  
p.G456E



p.T3822T

p.F378F

p.G143D

p.E46K

p.E157D

p.G523R

p.R626R

p.I110I

p.R277\*

p.V551M

p.D174H

p.L161L

p.E272K

p.P290S

p.L209L

p.P1097S

p.P586S

p.A196T

p.R47W

p.R75\_splice

p.D500N

p.P232S

p.A186T

p.S72F

p.R36C

p.S687F

p.V689V

p.S267S

p.S408S

p.P1113L

p.G44D

p.E227K

p.W591\*

p.L50L

p.R98\*

p.D1079N

p.V233V  
p.P79P

p.F1118F  
p.G1522E  
p.S725S  
p.M131I  
p.G420E

p.N157T  
p.P850S  
p.S343L  
p.R75W  
p.P452L  
p.R361R  
p.P531S  
p.A936A

p.P319P  
p.I414I  
p.H55Y  
p.R681Q  
p.F233F  
p.S2785F  
p.I109I  
p.P130L  
p.P971L  
p.H276Y  
p.L67L  
p.P569S  
p.S1629F  
p.R518Q  
p.E451K  
p.G372R  
p.S8S

p.M79I  
p.S749S  
p.S5F  
p.Q502Q

p.E398K  
p.S1375S

p.E267K  
p.S438S  
p.S33L  
p.P759L

p.D290N  
p.P510S  
p.P333S  
p.F683L

p.D54N

p.S363S  
p.D1351N  
p.D326D  
p.V416V  
p.T105T  
p.W315\*

p.L97F  
p.S15F  
p.F160F  
p.G363E  
p.R421C  
p.S181F  
p.E19\_splice

p.P63L

p.R435Q  
p.E196K  
p.S681L  
p.P78S  
p.G220S  
p.G100R  
p.F334Y  
p.D431N

p.F404F  
p.G118E  
p.M341I  
p.S2067S  
p.E577K  
p.R74Q

p.S169F  
p.P213S  
p.S149F  
p.D1648V  
p.A1289V  
p.F1028F  
p.Y366\*

p.V1256V  
p.T1480I  
p.F381F  
p.P39L  
p.R1779R  
p.E1817K  
p.S284N

p.D271N  
p.K1220K  
p.P1026L  
p.P21P  
p.T460I  
p.P1808S

p.G401E  
p.E916K  
p.P130S  
p.I369I  
p.P151L  
p.P655P  
p.P822L  
p.T36M  
p.L423L  
p.R126C  
p.R747W  
p.I112I

p.P272S  
p.D372N  
p.G231E  
p.P2261L  
p.G429S

p.G225G

p.E2150K  
p.K196K  
p.S408F

p.G665G

p.R476W  
p.S103S  
p.S284S

p.D158N  
p.D1305N  
p.L72L  
p.A30V  
p.P12S

p.H867H  
p.P34S  
p.E486K  
p.A96A  
p.W1447\*  
p.S339F  
p.N491N  
p.L402L  
p.P388S  
p.Q117\_splice  
p.D705N  
p.R232C  
p.S179S  
p.D1257N  
p.G215G

p.G109\_splice

p.P227S

p.P714L

p.L597L

p.P853L

p.L286L

p.D177N

p.P930L

p.S493F

p.E1184K

p.F343F

p.P1121L

p.P976P

p.I1036I

p.D873N

p.H27P

p.T109T

p.I316I

p.P39S

p.F339F

p.P600S

p.E371K

p.S431S

p.E1652K

p.L1053F

p.L197L

p.G311E

p.E622E

p.S113F

p.A224V

p.G1744E

p.R183R

p.E83E

p.L359F

p.R179K

p.P729S

p.E221K

p.F472F

p.S833F

p.T2141I  
p.R508S  
p.S977F  
p.A629V  
p.G1026R  
p.T37I  
p.L192L  
p.P772S  
p.A283V

p.I1252I

p.L759F  
p.P55L  
p.S93F  
p.L732L  
p.P697S

p.R1510C  
p.H358Y

p.E121K  
p.S1412S  
p.Q412\*

p.E142K

p.E214K  
p.V633V  
p.T141T  
p.F161F  
p.E3206K  
p.G211R  
p.S292F  
p.L103L  
p.S673L  
p.L399F  
p.F13F  
p.G84S  
p.V942V

p.G288D  
p.P203S  
p.H117Y  
p.F72F  
p.D873N  
p.A48\_splice  
p.L105L  
p.E45K  
p.G182R  
p.E184K  
p.P499S  
p.L609F  
p.S482S  
p.F371F  
p.E128E  
p.G414E

p.E44K  
p.E859K

p.S68F  
p.S1053L

p.T263T  
p.L218L  
p.P118S  
p.S179F  
p.S665F  
p.W162\*  
p.P419S  
p.R993C  
p.T874I  
p.T1906I  
p.P224L

p.R212R  
p.K465K  
p.A438A  
p.S159\_splice  
p.P26L  
p.E126\_splice  
p.F438Y  
p.G96G



p.W69\_splice  
p.W919\*  
p.H567Y

p.A12T  
p.E308K  
p.S388L  
p.S825F  
p.R153K  
p.P275S

p.S355F

p.P1808L  
p.P2714L  
p.M319I  
p.G269D

p.L699L  
p.P590L  
p.I269I  
p.G340D  
p.R297Q  
p.A701V  
p.A317V  
p.R1099Q  
p.R262Q  
p.P157S

p.L666L  
p.Y995C  
p.S1587S  
p.R2561R

p.R46H  
p.F328F  
p.P667L  
p.P548S  
p.P130P  
p.G270E  
p.I421I  
p.W932\*

p.L56L  
p.P562P  
p.S588L  
p.P12S

p.G100E  
p.G206S  
p.D19N  
p.L575L  
p.P115S  
p.G586D  
p.T393T  
p.S483F  
p.P128L  
p.D1747N  
p.P1109S

p.R341R  
p.D555N  
p.E48K  
p.G141R  
p.P308L  
p.D641\_splice  
p.R11K  
p.R92R  
p.L588L  
p.E802K  
p.R760W  
p.P128S  
p.E149K  
p.P380S

p.P497S  
p.H432Y  
p.R498Q  
p.R274R  
p.L403L  
p.P254P

p.A9A  
p.R445K  
p.L589L

p.I308I  
p.L24L  
p.G190S  
p.E567K

p.P365L  
p.P536L  
p.E219E  
p.R436C  
p.F321F  
p.F726F  
p.R828Q  
p.E69K  
p.P2168L  
p.R170C  
p.G180S  
p.G311R  
p.I133I  
p.N312N  
p.D17N  
p.M275I  
p.P971P  
p.P2364L  
p.S399F  
p.R311C  
p.Q168\*  
p.P562L

p.T504T  
p.P29S  
p.L82F  
p.P112L  
p.S336F  
p.F749F  
p.P604S  
p.E334K  
p.Q224\*  
p.E92E  
p.I158I  
p.G34E

p.D326V

p.P812S  
p.P261L

p.N53S  
p.E355K

p.Q572\*  
p.E368K  
p.I294I  
p.G375G  
p.I352I  
p.P447S  
p.I731I  
p.P234S  
p.E204E  
p.P1015L  
p.E274K  
p.S1235F  
p.S222S  
p.Q74E  
p.V214V  
p.V269V  
p.G395E  
p.G54S  
p.G1080E

p.K471K  
p.L125L  
p.P170S  
p.G472R  
p.R588\*  
p.G275E  
p.F51F  
p.E788K

p.Q796H  
p.F450F  
p.N408S  
p.R81W  
p.S267F  
p.S1909F  
p.P777L  
p.G132R

p.P414P  
p.E36K  
p.L177L  
p.R170Q  
p.D665N  
p.W236\*  
p.S774S  
p.S1896F

p.E244K  
p.S21F  
p.S99S  
p.P191S  
p.R216R  
p.P26S  
p.W77\*  
p.R13564C  
p.D146Y  
p.G673G  
p.E1021K  
p.R149C  
p.R508\*  
p.G1426R

p.P536S

p.R451\*  
p.Q307Q  
p.S740S  
p.G1295E  
p.T530T  
p.P198L  
p.L567F  
p.H2802Y

p.D1009N  
p.G1569R  
p.P131L  
p.V8M

p.P310S  
p.S254L

p.I224I  
p.S136F  
p.I30I  
p.P3294L  
p.D20N  
p.L69F  
p.M347I  
p.R158K  
p.M1048I  
p.L303L  
p.E258K  
p.E714K  
p.R196K  
p.P444S  
p.S75S  
p.L1162L  
p.I971I  
p.D2110D  
p.F909F

p.E200E  
p.L192L  
p.E218K  
p.F2594F  
p.R345C  
p.P850L

p.P28L  
p.M277I  
p.L466L  
p.G55R  
p.F87F  
p.A378V  
p.S149S  
p.T190T  
p.H820Y  
p.E387K  
p.G25R  
p.A356A  
p.R864K  
p.R291K  
p.P119L

p.Q418\*  
p.G39G  
p.D1954N  
p.Q110H  
p.P383A  
p.P151L  
p.C433C  
p.G258R  
p.P414S

p.F1190V

p.G403E  
p.E375K  
p.S141L  
p.A1937T  
p.L723L  
p.E1386\_splice  
p.S763F  
p.G727G  
p.P463S  
p.T149M  
p.G586S  
p.K218K  
p.E255K  
p.L301L  
p.I182S  
p.Q696\*  
p.S1660S  
p.L291P  
p.P368P  
p.R194C  
p.F557F  
p.L515F

p.K68K  
p.V413M  
p.E534K

p.S4190F  
p.F1981F  
p.S265F  
p.F253F

p.S159\_splice

p.K133R

p.G81S

p.V170V

p.M726I

p.P212S

p.E325K

p.G1784E

p.R708K

p.E55K

p.D357N

p.E599K

p.P48S

p.A213V

p.I1080I

p.S95F

p.P395S

p.N344N

p.S231S

p.H687Y

p.S76T

p.P891S

p.I748I

p.K435\_splice

p.P2735\_splice

p.D4116N

p.E54E

p.G191E

p.P487L

p.K220K

p.A311V

p.S138F

p.P35S

p.R916C

p.P895L

p.S213F

p.M212I



p.E1539K  
p.L170S  
p.S332S  
p.S1222L

p.G94E  
p.G1028E  
p.G832E  
p.P154L  
p.L2687L  
p.P41S  
p.G1357S  
p.D99N  
p.S551S  
p.E339K  
p.P726S

p.E338E  
p.A214A  
p.R96R  
p.D88N  
p.P95S

p.S355S  
p.G4253A

p.M2136I

p.V51\_splice  
p.R202W  
p.E563K  
p.P24L  
p.D2798N  
p.A15V  
p.L1290fs  
p.P40fs  
p.K2169del  
p.S352L  
p.P754S  
p.T730T

p.D470D  
p.R217C  
p.S968L  
p.R233R

p.R637Q  
p.V339\_splice  
p.S264F  
p.P1402S  
p.E4D  
p.L573F  
p.F49F  
p.G438G  
p.G11571\_splice  
p.M155I  
p.R77P

p.A144T  
p.D270N

p.E1324K  
p.F441F  
p.G192\*  
p.T123T  
p.P103L

p.R499C  
p.H7N  
p.T374T  
p.R989\*  
p.L18L  
p.E197K  
p.D929\_splice  
p.Q36\*  
p.Q61R  
p.P772L

p.D3N  
p.V309V  
p.R541C  
p.F171F  
p.R700R

p.F417L  
p.S803S  
p.M246V

p.G99E  
p.P104S  
p.S123S  
p.R592K

p.N133K

p.L1060\_splice

p.Q290K  
p.S1051F  
p.P1192P  
p.D390N  
p.R482W

p.K566\_splice

p.R18K  
p.G29E  
p.P4700S  
p.W335L

p.S270L  
p.P878L  
p.P803L

p.K628\_splice

p.G748G  
p.V32V  
p.W692\*  
p.E372K  
p.D574N

p.E1160K

p.N221H  
p.R59R

p.W1155\*

p.Q927Q  
p.P26L  
p.M90I  
p.F65F

p.L143L  
p.P234L

p.L33L  
p.S30R  
p.R817H  
p.M19I  
p.H161Y  
p.P720S  
p.G592S  
p.A188V  
p.G1207E  
p.S50F  
p.W257\*  
p.R597C  
p.S386F  
p.G125\_splice

p.F923F  
p.I133I  
p.F159F  
p.M552I  
p.Q3H  
p.G111G

p.P62P  
p.P393S  
p.G697E  
p.G87\_splice  
p.V63I

p.P194S

p.L824L  
p.R118W  
p.Q2207R  
p.R797H  
p.R40G  
p.A96\_splice  
p.K273K  
p.S239L  
p.E272K  
p.P334S

p.A17T

p.K304\*

p.M97I

p.A14\_splice

p.F153F

p.Q394\*

p.E634K

p.P185P

p.S94F

p.I1317I

p.G64V

p.V20V

p.R1221R

p.F532F

p.P217L

p.R278K

p.S375S

p.E149K

p.D806\_splice

p.S84S

p.R216Q

p.S543F

p.A666A

p.V756M

p.E46K

p.G823E

p.E18936K

p.L793L

p.S218F

p.Q720Q

p.H1278R

p.E338K

p.I277I

p.K452R

p.P313L

p.I364I

p.V422V

p.A3601A  
p.S196S  
p.I261I  
p.R552S

p.G246G

p.F341F  
p.L114L  
p.A264T

p.Y42Y  
p.F103L  
p.S254L  
p.E261\_splice  
p.R129\*  
p.D85N  
p.G693E  
p.E209K  
p.R155R  
p.Y200H

p.R399G  
p.E430K

p.G87E

p.P558L

p.R108Q  
p.G783E  
p.I167I  
p.L932L  
p.P773S  
p.I731I  
p.E44G  
p.G1004R

p.P763L

p.V821V  
p.N324S

p.H762Y  
p.P418L  
p.P151P  
p.P240S  
p.S481S  
p.P46R  
p.T3T

p.G458A

p.F172F  
p.R418K  
p.I247I  
p.V470V  
p.R198R  
p.D356N  
p.P254S

p.P1454P  
p.L477L

p.E166V  
p.R505\*  
p.P213S  
p.R1308W

p.S1704L  
p.P466L

p.G713D  
p.L1403L  
p.P119S  
p.G543S  
p.L259L  
p.F118F  
p.W68\*  
p.P77S  
p.G172V  
p.G225E  
p.G750R  
p.L11P  
p.E348K

p.L393L  
p.R155Q  
p.P384L  
p.F30F  
p.K242E  
p.E1616K  
p.P102P

p.R235\_splice  
p.E498K

p.Q1457\*  
p.G305E  
p.R56Q  
p.E65D

p.P194P  
p.L16L  
p.S359L

p.D72N  
p.N1637T  
p.I786I  
p.R229W  
p.A465A  
p.K796N  
p.P558S  
p.S103F

p.K208K  
p.T818M  
p.P294L  
p.G369S  
p.T735T

p.P103P  
p.P1179L

p.F257F



p.E666K  
p.Y3264H  
p.I318I

p.Q117Q  
p.R186Q  
p.L1309F

p.S309F

p.K370K  
p.G261R  
p.D184N  
p.P74L  
p.D261\_splice  
p.V3838V  
p.V2028I  
p.R652R  
p.E351K

p.G49V  
p.P14S  
p.G16E  
p.E1241K

p.S179F

p.E139K  
p.P87S

p.E778K

p.K276K  
p.K90E  
p.S175S  
p.P328P  
p.E18K  
p.Q135\*  
p.R187R  
p.S492S

p.G319E  
p.E416K

p.V1188A  
p.T1241I  
p.S363F  
p.P683L  
p.D857N  
p.R204C  
p.K73K  
p.P66S  
p.E495K  
p.R635H

p.Y65S  
p.F191F

p.E525E  
p.G39W  
p.E384\*  
p.P779S

p.D19N  
p.K117K  
p.R829R

p.G1090\_splice

p.P37S  
p.G537\_splice

p.N77N  
p.R80Q

p.F15L  
p.T799I  
p.E4030K

p.F1127F  
p.S133S  
p.G598S  
p.V157G  
p.P313S  
p.G1580R

p.A500A  
p.E2113K  
p.D273V  
p.E87E

p.S134L  
p.R75Q

p.H2660Y  
p.H59Y  
p.V507E  
p.P267S  
p.W255\*  
p.K115R

p.G896E  
p.S1739L  
p.P758S

p.R598C  
p.L690S  
p.D631N  
p.P151S  
p.P284S  
p.R83Q  
p.M297I  
p.K3N  
p.G176R  
p.F522F  
p.R407W

p.S166F  
p.R40C  
p.S215F  
p.G952E

p.P737L  
p.G549R  
p.R1453P  
p.S70S  
p.R270H  
p.D1335D  
p.F113F  
p.M1I  
p.Q462\*  
p.E771K  
p.M81I  
p.G111G  
p.G556E  
p.G767G  
p.Q297\*  
p.S481F  
p.D67N

p.P151L  
p.G156S  
p.I845I  
p.R465R  
p.G32D  
p.A2104V  
p.S36F  
p.N142S  
p.R630R  
p.S496S  
p.R341C

p.I375I  
p.E41K  
p.P74P

p.\*170\*  
p.F366S

p.R193Q  
p.I129I  
p.V709V  
p.E741K  
p.R170R  
p.C32\*  
p.F95F  
p.L121L  
p.160\_161insG

p.L28R  
p.F22S  
p.R922H  
p.R23W

p.P230S  
p.T998S  
p.C184C  
p.R396W  
p.S452S

p.T2077A

p.S841N  
p.V479M  
p.S197F  
p.C386C  
p.R118W  
p.T957M

p.Q812R  
p.P1020P  
p.S108L

p.R635W  
p.R788C  
p.G102D  
p.S24G  
p.A563V  
p.N432S

p.R53H  
p.L5P

p.V220\_splice

p.A310A

p.R1246W

p.H4P

p.A402T

p.H268Q

p.S98G

p.R277Q

p.A1078V

p.L153F

p.R757S

p.Q204Q

p.V106M

p.Y101H

p.C749Y

p.L185L

p.P49L

p.Q4H

p.N131N

p.C347C

p.G501V

p.G773R

p.E68K

p.H509Y

p.G2545D

p.S173N

p.A196T

p.E685\_splice

p.G44G

p.E137K

p.A222A

p.V755L

p.L314L

p.L327L

p.G131\*

p.R108C

p.W808\*

p.D589D

p.L255L

p.G203\_splice

p.G146\_splice

p.P498P

p.A226T

p.L225L

p.K274\_splice

p.E221Q

p.V46A

p.L131L

p.I138K

p.W640S

p.D63N

p.G597G

p.R565W

p.F729C

p.L411F

p.M560I

p.L132L

p.P392P

p.R414H

p.T325T

p.W808\*

p.R55L
