# Supplementary material
Source: PubMed Central journal article supplement (PMC5577644)
Supplement: NIHMS892660-supplement-Supp_3.pdf [file NIHMS892660-supplement-Supp_3.pdf]

**Supplementary Information 3. Summary of the number of identified somatic mutations, pred**

|                                                       |            |                   | <b>Pt1</b> |
|-------------------------------------------------------|------------|-------------------|------------|
| <b>Total mutations</b>                                |            |                   | 179        |
|                                                       | Non-NeoORF | Missense_Mutation | 84         |
|                                                       |            | In_Frame_InDel    | 3          |
|                                                       | NeoORF     | Frame_Shift_InDel | 1          |
|                                                       | Other      |                   | 91         |
| <b>Mutations with more than 1 binder</b>              |            |                   | 47         |
|                                                       | Non-NeoORF | Missense_Mutation | 47         |
|                                                       |            | In_Frame_InDel    | 0          |
|                                                       | NeoORF     | Frame_Shift_InDel | 0          |
| <b>Binders predicted (binding affinity &lt;500nM)</b> |            |                   | 107        |
|                                                       | Non-NeoORF | Missense_Mutation | 107        |
|                                                       |            | In_Frame_InDel    | 0          |
|                                                       | NeoORF     | Frame_Shift_InDel | 0          |
| <b>HLA predicted epitopes after filtering</b>         |            |                   | 60         |
| <b>Number of peptides included in vaccine</b>         |            |                   | 13         |

lected HLA binders and synthesized immunizing peptides for Patients 1-10

| Pt2   | Pt3 | Pt4   | Pt5 | Pt6   | Pt7 | Pt8 | Pt9 | Pt10 |
|-------|-----|-------|-----|-------|-----|-----|-----|------|
| 1,887 | 820 | 1,995 | 728 | 3,920 | 953 | 489 | 51  | 70   |
| 960   | 395 | 1,036 | 350 | 1,864 | 523 | 240 | 32  | 27   |
| 0     | 0   | 0     | 1   | 3     | 0   | 1   | 1   | 0    |
| 14    | 0   | 3     | 3   | 12    | 1   | 2   | 0   | 0    |
| 913   | 425 | 956   | 374 | 2,041 | 429 | 246 | 18  | 43   |
| 273   | 221 | 530   | 181 | 560   | 265 | 146 | 5   | 10   |
| 267   | 221 | 528   | 180 | 554   | 265 | 146 | 5   | 10   |
| 0     | 0   | 0     | 1   | 1     | 0   | 0   | 0   | 0    |
| 6     | 0   | 2     | 0   | 5     | 0   | 0   | 0   | 0    |
| 399   | 495 | 1,099 | 439 | 856   | 517 | 302 | 7   | 19   |
| 384   | 495 | 1,088 | 438 | 846   | 517 | 302 | 7   | 19   |
| 0     | 0   | 0     | 1   | 1     | 0   | 0   | 0   | 0    |
| 15    | 0   | 11    | 0   | 9     | 0   | 0   | 0   | 0    |
| 220   | 91  | 388   | 152 | 293   | 71  | 79  | NA  | NA   |
| 17    | 14  | 14    | 20  | 20    | 17  | 14  | NA  | NA   |
