# Supplementary material
Source: PubMed Central journal article supplement (PMC5577644)
Supplement: NIHMS892660-supplement-Supp_4.pdf [file NIHMS892660-supplement-Supp_4.pdf]

**Supplementary Information 4. Summary of expression and class I prediction related to the imm**

| Patient ID | Immunizing pool | Gene                   | Protein change | Peptide length | HLA allele | Mutated peptide |               |
|------------|-----------------|------------------------|----------------|----------------|------------|-----------------|---------------|
|            |                 |                        |                |                |            | Sequence        | Affinity (nM) |
| 1          | A               | ACPP                   | p.E34K         | 9              | A24:02     | KLKFVTLVF       | 142.38        |
| 1          | A               | ACPP                   | p.E34K         | 9              | B15:01     | KLKFVTLVF       | 31.89         |
| 1          | A               | ACPP                   | p.E34K         | 9              | A02:01     | VLAKKLKFV       | 52.9          |
| 1          | A               | PRTG                   | p.F1055L       | 9              | A02:01     | FLFQDSKKI       | 83.31         |
| 1          | A               | PRTG                   | p.F1055L       | 9              | A24:02     | NSKKKWFLF       | 443.84        |
| 1          | A               | ZBED4                  | p.S218F        | 10             | B15:01     | VQKVASKIPF      | 78.86         |
| 1          | B               | ARHGEF15               | p.V651A        | 9              | B15:01     | ALFASRPRF       | 63.84         |
| 1          | B               | DCAKD                  | p.S199F        | 10             | A24:02     | RFLEYLPLRF      | 8.56          |
| 1          | B               | DCAKD                  | p.S199F        | 9              | B44:02     | TELERFLEY       | 46.71         |
| 1          | B               | DCAKD                  | p.S199F        | 9              | B15:01     | LLHTELERF       | 195.8         |
| 1          | B               | DCAKD                  | p.S199F        | 10             | A02:01     | LLHTELERFL      | 490.36        |
| 1          | B               | NLRC4                  | p.D368E        | 9              | A02:01     | TLFHTFYEL       | 6.51          |
| 1          | B               | NLRC4                  | p.D368E        | 10             | A02:01     | TLFHTFYELL      | 28.42         |
| 1          | B               | NLRC4                  | p.D368E        | 10             | A24:02     | LFHTFYELLI      | 166.44        |
| 1          | B               | NLRC4                  | p.D368E        | 9              | A24:02     | LFHTFYELL       | 235.89        |
| 1          | B               | NLRC4                  | p.D368E        | 10             | A02:01     | TTLFHTFYEL      | 350.83        |
| 1          | B               | NLRC4                  | p.D368E        | 10             | A24:02     | TTLFHTFYEL      | 403.46        |
| 1          | C               | ADARB1                 | p.D340N        | 9              | A24:02     | KFGDLTNNF       | 54.4          |
| 1          | C               | CASP5 <sup>a</sup>     | NeoORF         |                |            |                 |               |
| 1          | C               | MECOM                  | p.Q216K        | 9              | A02:01     | KLFESKAEL       | 14.88         |
| 1          | C               | MECOM                  | p.Q216K        | 10             | A02:01     | KLFESKAELA      | 40.48         |
| 1          | C               | PRRC2C                 | p.S2300P       | 9              | B15:01     | YNSFSSAPM       | 241.99        |
| 1          | C               | PRRC2C                 | p.S2300P       | 10             | A24:02     | SFSSAPMPQI      | 461.4         |
| 1          | D               | CASP5 <sup>b</sup>     | NeoORF         |                |            |                 |               |
| 1          | D               | LUM                    | p.G248E        | 9              | A02:01     | GIPENSFNV       | 36.89         |
| 1          | D               | RUSC2                  | p.S569F        | 9              | B15:01     | SVGDFSQEF       | 284           |
| 1          | D               | RUSC2                  | p.S569F        | 10             | B15:01     | VSVGDFSQEF      | 155.65        |
| 2          | A               | ADM2 <sup>a</sup>      | NeoORF         | 9              | B56:01     | TPAAPTAMA       | 60            |
| 2          | A               | ADM2 <sup>b</sup>      | NeoORF         |                |            |                 |               |
| 2          | A               | C14orf101 <sup>a</sup> | p.R490Q        | 9              | B56:01     | FPGNQWNPV       | 25            |
| 2          | A               | CDK13                  | p.G857R        | 10             | A01:01     | LADFRLARLY      | 13.29         |
| 2          | A               | POLQ                   | p.S1719F       | 9              | B38:01     | NHDETSFL        | 5             |
| 2          | B               | ADM2 <sup>c</sup>      | NeoORF         | 9              | B56:01     | TPAHPSQGA       | 400           |
| 2          | B               | ADM2 <sup>c</sup>      | p.G97fs        | 10             | B56:01     | TPAHPSQGAV      | 0.50 (%rank)  |
| 2          | B               | ADM2 <sup>d</sup>      | NeoORF         |                |            |                 |               |
| 2          | B               | ITGA9                  | p.L548P        | 9              | A01:01     | VTEKLQPTY       | 28.34         |
| 2          | B               | PRRC2A                 | p.L528H        | 10             | B56:01     | HPAPPAPPPA      | 25            |
| 2          | B               | PRRC2A                 | p.L528H        | 10             | B56:01     | VPKEHPAPPA      | 0.30 (%rank)  |
| 2          | C               | ADM2 <sup>e</sup>      | NeoORF         |                |            |                 |               |

|   |   |                        |          |    |        |            |              |
|---|---|------------------------|----------|----|--------|------------|--------------|
| 2 | C | CCDC80                 | NeoORF   | 9  | B56:01 | RPAARGSRV  | 500          |
| 2 | C | DDX3X                  | p.E388K  | 9  | B56:01 | FPKKIQLMLA | 50           |
| 2 | C | PCDH1                  | p.S569F  | 10 | A01:01 | FLDREQRESY | 28.41        |
| 2 | D | BAZ2A                  | p.S500F  | 9  | B56:01 | FPAAAFPTA  | 5            |
| 2 | D | BAZ2A                  | p.S500F  | 9  | B56:01 | SPVTFPAAA  | 0.10 (%rank) |
| 2 | D | BAZ2A                  | p.S500F  | 10 | B56:01 | FPAAAFPTAS | 0.12 (%rank) |
| 2 | D | C14orf101 <sup>b</sup> | p.A59D   | 9  | A01:01 | ITDAHELGV  | 147.21       |
| 2 | D | C14orf101 <sup>b</sup> | p.A59D   | 10 | A01:01 | ITDAHELGVA | 474.22       |
| 2 | D | JPH1                   | p.T59I   | 9  | A01:01 | YTWPSGNIY  | 60.22        |
| 2 | D | RIF1                   | NeoORF   |    |        |            |              |
| 3 | A | DNASE1L1               | p.P140S  | 10 | A02:01 | VLSSLVLVPL | 24.51        |
| 3 | A | DNASE1L1               | p.P140S  | 9  | A02:01 | NVLSSLVLV  | 58.9         |
| 3 | A | DNASE1L1               | p.P140S  | 10 | A02:01 | SLPSNVLSSL | 159.49       |
| 3 | A | PRKCG                  | p.E525K  | 10 | A03:01 | KIAYQPYGK  | 50.14        |
| 3 | A | TLR3                   | p.R489K  | 10 | A03:01 | RLMLRKVALK | 28.68        |
| 3 | A | TLR3                   | p.R489K  | 10 | B27:05 | QRLMLRKVAL | 90.29        |
| 3 | A | TLR3                   | p.R489K  | 9  | A02:01 | RLMLRKVAL  | 303.28       |
| 3 | A | TLR3                   | p.R489K  | 10 | A02:01 | SLQRLMLRKV | 478.89       |
| 3 | B | FAM190A                | p.V195A  | 10 | A02:01 | ALQSQSISLV | 28.16        |
| 3 | B | FAM190A                | p.V195A  | 9  | A02:01 | ALQSQSISL  | 93.83        |
| 3 | B | GTF3C2                 | p.D811N  | 9  | A02:01 | YLLFQNTDL  | 42.28        |
| 3 | B | KCNC3                  | p.P715L  | 10 | A03:01 | ALSPDGSIRK | 107.78       |
| 3 | B | KCNC3                  | p.P715L  | 9  | A02:01 | FLLTDYALS  | 172.65       |
| 3 | B | TBC1D14                | p.S42F   | 10 | A03:01 | LLFAPEYGPK | 32.81        |
| 3 | C | CASP1                  | p.P172S  | 10 | B27:05 | WRNILLLSLH | 63.38        |
| 3 | C | CASP1                  | p.P172S  | 10 | A03:01 | SLHKGSLYPR | 286.7        |
| 3 | C | CIT                    | p.P2056L | 9  | A02:01 | TLLSQVNKV  | 60.92        |
| 3 | C | CIT                    | p.P2056L | 10 | B27:05 | VRTLLSQVNK | 272.84       |
| 3 | C | ENDOV                  | p.E257K  | 10 | A03:01 | RTAPRPGSQK | 114.76       |
| 3 | C | VPS16                  | p.S404F  | 10 | A03:01 | SLLRAAFFGK | 26.91        |
| 3 | C | VPS16                  | p.S404F  | 10 | B27:05 | LRAAFFGKCF | 191.23       |
| 3 | D | ADAMTS7                | p.T96I   | 10 | B27:05 | LRFNLIANQH | 97.24        |
| 3 | D | CRY1                   | p.S71F   | 9  | A02:01 | KLNFRLFVI  | 42.53        |
| 3 | D | CRY1                   | p.S71F   | 10 | B27:05 | RKLNFRLFVI | 189.69       |
| 3 | D | CRY1                   | p.S71F   | 10 | A03:01 | KLNFRLFVIR | 265.62       |
| 3 | D | ZNF234                 | p.H282Y  | 10 | A03:01 | RIYTGEKPFK | 18.67        |
| 4 | A | ARHGAP29               | p.G670E  | 9  | B18:01 | FEAEFTQVA  | 41.66        |
| 4 | A | DHX40 <sup>b</sup>     | NeoORF   | 9  | A02:01 | ILMHGLVSL  | 6.29         |
| 4 | A | DHX40 <sup>b</sup>     | p.S754fs | 10 | B27:02 | RRNDDKSILM | 0.50 (%rank) |
| 4 | A | DHX40 <sup>b</sup>     | p.S754fs | 10 | A02:01 | SILMHGLVSL | 310.72       |
| 4 | A | DHX40 <sup>a</sup>     | NeoORF   | 10 | B27:02 | RRWSALVIGL | 5.001        |
| 4 | A | DHX40 <sup>a</sup>     | p.S754fs | 9  | B27:02 | KRRWSALVI  | 0.12 (%rank) |
| 4 | A | DHX40 <sup>a</sup>     | p.S754fs | 9  | B27:02 | RRWSALVIG  | 0.80 (%rank) |
| 4 | A | DHX40 <sup>a</sup>     | p.S754fs | 10 | A25:01 | STTKRRWSAL | 1.00 (%rank) |
| 4 | A | MKNK1                  | p.P265S  | 9  | A02:01 | YMASEVVEV  | 2.19         |

|   |   |                    |          |    |        |            |              |
|---|---|--------------------|----------|----|--------|------------|--------------|
| 4 | A | MKNK1              | p.P265S  | 10 | A02:01 | YMASEVVEVF | 356.03       |
| 4 | B | ABCB5              | p.M632I  | 9  | B18:01 | DEQIESMTY  | 9.14         |
| 4 | B | DHX40 <sup>C</sup> | NeoORF   | 10 | A02:01 | KQAKVVNPPI | 134.81       |
| 4 | B | DHX40 <sup>C</sup> | p.S754fs | 10 | B27:02 | KQAKVVNPPI | 1.00 (%rank) |
| 4 | B | MGA                | p.N2653D | 9  | A02:01 | FMMPRIVDV  | 2.7          |
| 4 | B | MGA                | p.N2653D | 10 | A02:01 | FMMPRIVDVT | 15.54        |
| 4 | C | CCDC66             | NeoORF   | 10 | A02:01 | MTFSSTKDYY | 173.97       |
| 4 | C | HLA-DQA1           | p.P113S  | 9  | B18:01 | NEVSEVTVF  | 28.49        |
| 4 | C | PATL1              | p.F288Y  | 10 | A02:01 | SQFARVPGYV | 46.52        |
| 4 | C | PATL1              | p.F288Y  | 9  | A25:01 | YVGSPLAAM  | 1.00 (%rank) |
| 4 | C | PATL1              | p.F288Y  | 9  | B27:02 | SQFARVPGY  | 1.00 (%rank) |
| 4 | C | TNR                | p.R1007W | 9  | A02:01 | WLVDLLPST  | 17.19        |
| 4 | C | TNR                | p.R1007W | 9  | B18:01 | EEFWLVDLL  | 34.7         |
| 4 | C | TNR                | p.R1007W | 10 | B18:01 | EEFWLVDLLP | 372.84       |
| 4 | D | ATF7IP             | p.P1205L | 9  | A02:01 | HLYAYHEEL  | 15.46        |
| 4 | D | ATF7IP             | p.P1205L | 9  | B18:01 | EELSATVPS  | 79.41        |
| 4 | D | ATF7IP             | p.P1205L | 10 | B18:01 | EELSATVPSQ | 360.22       |
| 4 | D | IDH2               | p.R188W  | 9  | A25:01 | FVADWAGTF  | 15.001       |
| 4 | D | RPTOR              | p.S755F  | 10 | B18:01 | EESGGAVAFF | 10.95        |
| 4 | D | RPTOR              | p.S755F  | 9  | A25:01 | ESGGAVAFF  | 1.00 (%rank) |
| 5 | A | FAM200A            | p.S116F  | 9  | B35:01 | IPLSDNTIF  | 25.16        |
| 5 | A | GRIN2B             | p.E1104K | 9  | B41:02 | REFDKIELA  | 70.91        |
| 5 | A | GRIN2B             | p.E1104K | 10 | B41:02 | REFDKIELAY | 288.76       |
| 5 | A | MUC5B <sup>a</sup> | NeoORF   | 10 | A23:01 | SYQRYSHPLF | 3.16         |
| 5 | A | PSMB7              | p.P158L  | 10 | A23:01 | IYLGSTDKL  | 21.08        |
| 5 | A | TBX4               | p.S271F  | 9  | B35:01 | YPVIFKSIM  | 15.59        |
| 5 | A | TBX4               | p.S271F  | 10 | B41:02 | KEYPVIFKSI | 46.69        |
| 5 | A | TBX4               | p.S271F  | 9  | A23:01 | EYPVIFKSI  | 96.69        |
| 5 | A | TBX4               | p.S271F  | 10 | A23:01 | IFKSIMRQRL | 298.36       |
| 5 | B | CASC1              | p.H265Y  | 10 | B41:02 | YDYVSALHPV | 118.72       |
| 5 | B | CASC1              | p.H265Y  | 10 | A66:01 | HTHYDYVSAL | 134.74       |
| 5 | B | CASC1              | p.H265Y  | 9  | A23:01 | DYVSALHPV  | 236.35       |
| 5 | B | COL22A1            | p.D291N  | 9  | B35:01 | FPQGLPNEY  | 4.89         |
| 5 | B | COL22A1            | p.D291N  | 10 | B35:01 | LPNEYAFVTT | 142.25       |
| 5 | B | COL22A1            | p.D291N  | 9  | B35:01 | LPNEYAFVT  | 149.54       |
| 5 | B | COL22A1            | p.D291N  | 9  | B41:02 | NEYAFVTTF  | 179.52       |
| 5 | B | COL22A1            | p.D291N  | 9  | A23:01 | QGLPNEYAF  | 394.63       |
| 5 | B | FIGN               | p.R520Q  | 9  | A23:01 | ALPQSILLF  | 88.46        |
| 5 | B | FIGN               | p.R520Q  | 10 | A23:01 | TALPQSILLF | 121.24       |
| 5 | B | FIGN               | p.R520Q  | 10 | B35:01 | TALPQSILLF | 214.67       |
| 5 | B | MAP4K4             | p.S639L  | 9  | B35:01 | SPVLRSHSF  | 37.38        |
| 5 | B | MUC5B <sup>b</sup> | NeoORF   | 9  | A23:01 | SYQLYTHPL  | 6.94         |
| 5 | C | ADCK3              | p.L145R  | 9  | A23:01 | RFANPRDSF  | 119.83       |
| 5 | C | CLEC2B             | p.E77K   | 9  | A66:01 | TIIDNIKEM  | 96.35        |
| 5 | C | ZFYVE26            | p.S544F  | 10 | A23:01 | LFSPGAANLF | 28.84        |
| 5 | C | ZFYVE26            | p.S544F  | 9  | A23:01 | FSPGAANLF  | 405.26       |

|   |   |                    |          |    |        |            |        |
|---|---|--------------------|----------|----|--------|------------|--------|
| 5 | C | ZMIZ2              | p.P301L  | 9  | B35:01 | QPPALSPSY  | 55.19  |
| 5 | C | ZMIZ2              | p.P301L  | 10 | B35:01 | APSPGQPPAL | 335.87 |
| 5 | C | ZNF281             | p.G119E  | 10 | B35:01 | FPSQRTSWEF | 5.49   |
| 5 | D | MED24              | p.V981M  | 10 | B35:01 | MPFTTVSELM | 6.25   |
| 5 | D | MED24              | p.V981M  | 9  | B41:02 | SELMKVSAM  | 46.75  |
| 5 | D | MUC5B <sup>c</sup> | NeoORF   | 9  | B41:02 | HQFHVHPLL  | 116.84 |
| 5 | D | OVGP1              | p.P446S  | 10 | A66:01 | MTITSRGTTV | 125.96 |
| 5 | D | PDIA6              | p.P290S  | 10 | A23:01 | RYGIRGFSTI | 11.08  |
| 5 | D | PDIA6              | p.P290S  | 9  | A23:01 | YGIRGFSTI  | 90.29  |
| 5 | D | PIK3R2             | p.E5K    | 9  | B35:01 | MAGPKGQFY  | 81.8   |
| 6 | A | FAM50B             | p.E78K   | 9  | B08:01 | DMKARQKAL  | 12.27  |
| 6 | A | FAM50B             | p.E78K   | 10 | B08:01 | DMKARQKALV | 126.17 |
| 6 | A | MLL                | p.P3239L | 9  | B08:01 | TRKNKKLAL  | 85.77  |
| 6 | A | MLL                | p.P3239L | 10 | B08:01 | QTRKNKKLAL | 287.14 |
| 6 | A | RALGAPB            | NeoORF   | 10 | B08:01 | LFRIKFKEPL | 54.36  |
| 6 | A | SMC4               | p.L1262F | 9  | A01:03 | ISDRFIGIY  | 9.56   |
| 6 | A | SMC4               | p.L1262F | 10 | A66:01 | EISDRFIGIY | 28.69  |
| 6 | A | SMC4               | p.L1262F | 9  | A66:01 | EISDRFIGI  | 153.21 |
| 6 | A | TP63               | p.S458L  | 10 | A01:03 | QTSIQSPSLY | 35.69  |
| 6 | A | TP63               | p.S458L  | 9  | A01:03 | TSIQSPSLY  | 124.26 |
| 6 | B | DNMT3A             | p.E865K  | 10 | B08:01 | EMKRVFQFPV | 119.36 |
| 6 | B | PDE1C              | p.L121F  | 10 | A01:03 | VVDFKKNLEY | 18.48  |
| 6 | B | PISD               | NeoORF   | 9  | B08:01 | AAQARLQPV  | 101.2  |
| 6 | B | TEX2               | p.P207L  | 9  | B08:01 | HLARHRHLM  | 43.81  |
| 6 | B | TEX2               | p.P207L  | 9  | A66:01 | HLARHRHLM  | 312.21 |
| 6 | B | TEX2               | p.P207L  | 10 | B08:01 | SPHLARHRHL | 418.49 |
| 6 | B | DCUN1D4            | p.E325K  | 9  | A01:03 | LLDKFVEWY  | 49.75  |
| 6 | C | CADM4              | NeoORF   | 10 | B08:01 | MPAWRTRGAI | 122.56 |
| 6 | C | CADM4              | p.V87fs  | 9  | B08:01 | MPAWRTRGA  | 436.54 |
| 6 | C | DTX4               | p.P223L  | 10 | B08:01 | LPVTRKNMPL | 97.97  |
| 6 | C | KRIT1              | p.R600C  | 9  | A01:03 | WTNCILHEY  | 25.05  |
| 6 | C | KRIT1              | p.R600C  | 9  | A66:01 | WTNCILHEY  | 192.99 |
| 6 | C | SETBP1             | p.P1084S | 10 | A66:01 | HTLGAASSFM | 64.87  |
| 6 | C | SETBP1             | p.P1084S | 9  | A66:01 | HTLGAASSF  | 374.05 |
| 6 | C | ATP5J2-PTCD1       | p.R57Q   | 9  | B08:01 | QLFARARPM  | 53.95  |
| 6 | D | DNMBP              | p.H421Y  | 10 | A01:03 | ISSQPQVPFY | 120.15 |
| 6 | D | DNMBP              | p.H421Y  | 9  | A01:03 | SSQPQVPFY  | 204.31 |
| 6 | D | NCOA6              | p.P1371R | 9  | B08:01 | NVELRRNVL  | 110.18 |
| 6 | D | TBX10              | p.D256N  | 9  | A01:03 | ESDLNSWPV  | 34.68  |
| 6 | D | TNS1               | NeoORF   | 10 | B08:01 | LPSFRPPTAL | 249.23 |
| 6 | D | TNS1               | p.P789fs | 9  | B08:01 | ISIQRAQPL  | 421.26 |
| 6 | D | EEA1               | p.L1161F | 10 | A66:01 | ESIKEITNFK | 49.75  |
| 6 | D | EEA1               | p.L1161F | 9  | A66:01 | SIKEITNFK  | 424.91 |
| 6 | D | EEA1               | p.L1161F | 9  | A66:01 | ESIKEITNF  | 468.54 |

0: negative

1: positive

n.d.: not determined

## unizing peptides for Patients 1-6

| Wild type peptide |               | Immunizing peptide             |         | EPT peptide |
|-------------------|---------------|--------------------------------|---------|-------------|
| Sequence          | Affinity (nM) | Sequence                       | ID      | ID          |
| ELKFVTLVF         | 1140.75       | DRSVLAKKLFVTLVFRHGDRSPID       | 1-IMP04 | 1-EPT4A     |
| ELKFVTLVF         | 206.37        | DRSVLAKKLFVTLVFRHGDRSPID       | 1-IMP04 | 1-EPT4A     |
| VLAKEKLFV         | 28.52         | DRSVLAKKLFVTLVFRHGDRSPID       | 1-IMP04 | 1-EPT4C     |
| FFFQDSKKI         | 16441.6       | NNSKKKWFLFQDSKKIQVEQPQ         | 1-IMP03 | 1-EPT3A     |
| NSKKKWFFF         | 952.95        | NNSKKKWFLFQDSKKIQVEQPQ         | 1-IMP03 | 1-EPT3C     |
| VQKVASKIPS        | 11482.99      | SPIKLVQKVASKIPFPDRITEESV       | 1-IMP02 | 1-EPT2A     |
| VLFASRPRF         | 76.2          | RRGGALFASRPRFTPL               | 1-IMP12 | 1-EPT12A    |
| RSLEYLPLRF        | 126.93        | TKRQVILLHTELERFLEYLPLRF        | 1-IMP07 | 1-EPT7A     |
| TELERSLEY         | 64.96         | TKRQVILLHTELERFLEYLPLRF        | 1-IMP07 | 1-EPT7C     |
| LLHTELERS         | 20179.31      | TKRQVILLHTELERFLEYLPLRF        | 1-IMP07 | 1-EPT7D     |
| LLHTELERSL        | 966.37        | TKRQVILLHTELERFLEYLPLRF        | 1-IMP07 | 1-EPT7E     |
| TLFHTFYDL         | 36.32         | SHTQTTLFHTFYELLIQKNKHK         | 1-IMP06 | 1-EPT6A     |
| TLFHTFYDLL        | 49.68         | SHTQTTLFHTFYELLIQKNKHK         | 1-IMP06 | 1-EPT6C     |
| LFHTFYDLLI        | 200.18        | SHTQTTLFHTFYELLIQKNKHK         | 1-IMP06 | 1-EPT6D     |
| LFHTFYDLL         | 331.85        | SHTQTTLFHTFYELLIQKNKHK         | 1-IMP06 | 1-EPT6E     |
| TTLFHTFYDL        | 1607.05       | SHTQTTLFHTFYELLIQKNKHK         | 1-IMP06 | 1-EPT6F     |
| TTLFHTFYDL        | 1111.13       | SHTQTTLFHTFYELLIQKNKHK         | 1-IMP06 | 1-EPT6F     |
| KFGDLTDFN         | 91.84         | RLVLGKFGDLTNNFSSPHAR           | 1-IMP11 | 1-EPT11A    |
|                   |               | LSPREEFLRLCKKIMMRSIQ           | 1-IMP26 |             |
| QLFESKAEL         | 71.84         | EDSDKLFESKAELADHQKF            | 1-IMP08 | 1-EPT8A     |
| QLFESKAELA        | 195.32        | EDSDKLFESKAELADHQKF            | 1-IMP08 | 1-EPT8C     |
| YNSFSSASM         | 274.84        | PSTANYNSFSSAPMPQIPVASVTPT      | 1-IMP18 | 1-EPT18A    |
| SFSSASMPQI        | 470.86        | PSTANYNSFSSAPMPQIPVASVTPT      | 1-IMP18 | 1-EPT18C    |
|                   |               | LCPREEFLRLCKKIMMRSIQ           | 1-IMP17 |             |
| GIPGNSFNV         | 146.84        | SHNELADSGIPENSFNVSSLVE         | 1-IMP10 | 1-EPT10A    |
| SVGDSSQEF         | 256.71        | SGSPPLRVSVGDFSQEFSPIQEAQQD     | 1-IMP19 | 1-EPT19A    |
| VSVGDSQEF         | 211.44        | SGSPPLRVSVGDFSQEFSPIQEAQQD     | 1-IMP19 | 1-EPT19B    |
|                   |               | RPAGRTQLLWTPAAPTAMAEVGPHTP     | 2-IMP02 | 2-EPT2A     |
|                   |               | DGGRQHSGPRRHSGAGPKPSSSEWAVCWAP | 2-IMP29 |             |
| FPGNRWNPV         | 50            | KHLPGVNFPGNQWNPVEGILPS         | 2-IMP12 | 2-EPT12A    |
| LADFLARLY         | 10.52         | RGQIKLADFLARLYSSEESR           | 2-IMP09 | 2-EPT9A     |
| NHDETSSLL         | 15            | LENNANHDETSFLLPRKESNIVD        | 2-IMP08 | 2-EPT8A     |
|                   |               | WTPAAPTAMAEVGPHTPAHPSQGAVPP    | 2-IMP03 | 2-EPT3A     |
| NA                | NA            | WTPAAPTAMAEVGPHTPAHPSQGAVPP    | 2-IMP03 | 2-EPT3D     |
|                   |               | PAHPSQGAVPPSRAAAEPHLKPSPELQTA  | 2-IMP23 |             |
| VTEKLQPTY         | 5.06          | LGETMGQVTEKLQPTYMEET           | 2-IMP15 | 2-EPT15A    |
| LPAPPAPPPA        | 5             | PAPPPAVPKEHPAPPAPPASAPT        | 2-IMP14 | 2-EPT14A    |
| VPKELPAPPA        | 0.25 (%rank)  | PAPPPAVPKEHPAPPAPPASAPT        | 2-IMP14 | 2-EPT14C    |
|                   |               | DEQGREAELARSGPSAAGPVRLKPGLVPGL | 2-IMP24 |             |

|            |              |                               |                  |
|------------|--------------|-------------------------------|------------------|
|            |              | AAVRPEQRPAARGSRV              | 2-IMP04 2-EPT4A  |
| FPKEIQMLA  | 40           | TFPKKIQLMLARDFLDEY            | 2-IMP19 2-EPT19A |
| SLDREQRESY | 87.93        | PETGEIQVKTFDREQRESYELKV       | 2-IMP16 2-EPT16A |
| SPAAAFPTA  | 25           | VTSPKASPVTFPAAAFPTASPANKD     | 2-IMP07 2-EPT7A  |
| SPVTSPAAA  | 0.30 (%rank) | VTSPKASPVTFPAAAFPTASPANKD     | 2-IMP07 2-EPT7C  |
| SPAAAFPTAS | 1.50 (%rank) | VTSPKASPVTFPAAAFPTASPANKD     | 2-IMP07 2-EPT7D  |
| ITAAHELGV  | 2938.79      | PGGDSGELITDAHELGVAHPPGY       | 2-IMP06 2-EPT6A  |
| ITAAHELGVA | 6471.66      | PGGDSGELITDAHELGVAHPPGY       | 2-IMP06 2-EPT6D  |
| YTWPSGNTY  | 74.9         | EVVGGYTWPSGNIYQGYWAQGKR       | 2-IMP20 2-EPT20A |
|            |              | TIKNSDKNVVLEHFG               | 2-IMP28          |
| VLPSLVLVPL | 54.32        | SLPSNVLSSLVLVPLHHTTPK         | 3-IMP16 3-EPT16A |
| NVLPSTLV   | 63.74        | SLPSNVLSSLVLVPLHHTTPK         | 3-IMP16 3-EPT16C |
| SLPSNVLPSL | 45.43        | SLPSNVLSSLVLVPLHHTTPK         | 3-IMP16 3-EPT16D |
| EIIAYQPYGK | 2067.7       | FCGTPDYIAPKIIAYQPYGKSVD       | 3-IMP03 3-EPT3A  |
| RLMLRRVALK | 20.5         | TRNSFALVPSLQRLMLRKVALKNVDSSPS | 3-IMP19 3-EPT19A |
| QRLMLRRVAL | 47.69        | TRNSFALVPSLQRLMLRKVALKNVDSSPS | 3-IMP19 3-EPT19C |
| RLMLRRVAL  | 270.69       | TRNSFALVPSLQRLMLRKVALKNVDSSPS | 3-IMP19 3-EPT19D |
| SLQRLMLRRV | 479.4        | TRNSFALVPSLQRLMLRKVALKNVDSSPS | 3-IMP19 3-EPT19E |
| VLQSQSISLV | 33.62        | SSHYKFSKPALQSQSISLVQQS        | 3-IMP18 3-EPT18A |
| VLQSQSISL  | 127.32       | SSHYKFSKPALQSQSISLVQQS        | 3-IMP18 3-EPT18C |
| YLLFQDSDL  | 91.02        | TETVNHYYLLFQNTDLGSFHDLLR      | 3-IMP25 3-EPT25A |
| APSPDGSIRK | 18276.17     | DRASFLLDYALSPDGSIRKATG        | 3-IMP06 3-EPT6A  |
| FLLTDYAPS  | 61.8         | DRASFLLDYALSPDGSIRKATG        | 3-IMP06 3-EPT6C  |
| LLSAPEYGPK | 107.59       | NLKAPRLLFAPEYGPKLKLRALEDRHS   | 3-IMP22 3-EPT22A |
| WRNILLPLH  | 54.85        | ERFWRNILLSLHKGSYPRIPGLGKE     | 3-IMP27 3-EPT27A |
| PLHKGSYPR  | 4822.58      | ERFWRNILLSLHKGSYPRIPGLGKE     | 3-IMP27 3-EPT27C |
| TPLSQVNKV  | 34399.46     | RGRLPAGAVRTLLSQVNKVWDQSS      | 3-IMP04 3-EPT4A  |
| VRTPLSQVNK | 301.94       | RGRLPAGAVRTLLSQVNKVWDQSS      | 3-IMP04 3-EPT4C  |
| RTAPRPGSQE | 16312.37     | SPGPRTAPRPGSQKQAGKDWQ         | 3-IMP07 3-EPT7A  |
| SLLRAASFGK | 32.95        | GHEHQPDMQKSLRAAFFGKCFDR       | 3-IMP17 3-EPT17A |
| LRAASFGKCF | 338.47       | GHEHQPDMQKSLRAAFFGKCFDR       | 3-IMP17 3-EPT17C |
| LRFNLTANQH | 135.09       | ELQYRGRELRFNLIANQHLLAPGFVSETR | 3-IMP30 3-EPT30A |
| KLNSRLFVI  | 16.36        | EDLDANLRKLNFRFVIRGQPAD        | 3-IMP26 3-EPT26A |
| RKLNSRLFVI | 422.06       | EDLDANLRKLNFRFVIRGQPAD        | 3-IMP26 3-EPT26C |
| KLNSRLFVIR | 262.14       | EDLDANLRKLNFRFVIRGQPAD        | 3-IMP26 3-EPT26D |
| RIHTGEKPFK | 108.34       | HASHLQEHQRIYTGEKPFKCDT        | 3-IMP14 3-EPT14A |
| FGAEFTQVA  | 20395.4      | GHQKLPGKIHLFEAEFTQVAKKEPDG    | 4-IMP13 4-EPT13A |
|            |              | KMQRRNDDKSILMHGLVSLRESSRG     | 4-IMP02 4-EPT2A  |
| NA         | NA           | KMQRRNDDKSILMHGLVSLRESSRG     | 4-IMP02 4-EPT2E  |
| NA         | NA           | KMQRRNDDKSILMHGLVSLRESSRG     | 4-IMP02 4-EPT2G  |
|            |              | STLPVISDSTTKRRWSALVIGL        | 4-IMP01 4-EPT1A  |
| NA         | NA           | STLPVISDSTTKRRWSALVIGL        | 4-IMP01 4-EPT1C  |
| NA         | NA           | STLPVISDSTTKRRWSALVIGL        | 4-IMP01 4-EPT1H  |
| NA         | NA           | STLPVISDSTTKRRWSALVIGL        | 4-IMP01 4-EPT1I  |
| YMAPEVVEV  | 2.08         | TTPSGSAEYMASEVVEVFTDQAT       | 4-IMP15 4-EPT15A |

|             |               |                              |         |          |
|-------------|---------------|------------------------------|---------|----------|
| YMAPEVVEVF  | 215.93        | TTPSGSAEYMASEVVEVFTDQAT      | 4-IMP15 | 4-EPT15B |
| DEQMESMTY   | 10            | MSQDIKKADEQIESMTYSTERKT      | 4-IMP20 | 4-EPT20A |
|             |               | TTVTHERKQAKVVNPPIQEVGKGARK   | 4-IMP03 | 4-EPT3A  |
| NA          | NA            | TTVTHERKQAKVVNPPIQEVGKGARK   | 4-IMP03 | 4-EPT3A  |
| FMMPRIVNV   | 1.79          | PENDDL FMMPRIVDVTSLATEGG     | 4-IMP17 | 4-EPT17A |
| FMMPRIVNVT  | 16.54         | PENDDL FMMPRIVDVTSLATEGG     | 4-IMP17 | 4-EPT17B |
|             |               | KGEKNGMTFSSTKDYVNNV          | 4-IMP04 | 4-EPT4A  |
| NEVPEVTVF   | 26.75         | RYNSTAATNEVSEVTVFSKSPVT      | 4-IMP25 | 4-EPT25A |
| SQFARVPGFV  | 58.86         | GRMSPSQFARVPGYVGSPLAAMNPK    | 4-IMP30 | 4-EPT30A |
| FVGSPLAAM   | 1.00 (%rank)  | GRMSPSQFARVPGYVGSPLAAMNPK    | 4-IMP30 | 4-EPT30B |
| SQFARVPGF   | 0.20 (%rank)  | GRMSPSQFARVPGYVGSPLAAMNPK    | 4-IMP30 | 4-EPT30C |
| RLVDLLPST   | 41.39         | DGVSEEFWLVDLLPSTHYT          | 4-IMP21 | 4-EPT21A |
| EEFRLVDLL   | 125.21        | DGVSEEFWLVDLLPSTHYT          | 4-IMP21 | 4-EPT21C |
| EEFRLVDLLP  | 1108.99       | DGVSEEFWLVDLLPSTHYT          | 4-IMP21 | 4-EPT21D |
| HLAYHEEP    | 5957.75       | DSYHLYAYHEELSATVPSQWKKIG     | 4-IMP10 | 4-EPT10A |
| EEPSATVPS   | 2496.26       | DSYHLYAYHEELSATVPSQWKKIG     | 4-IMP10 | 4-EPT10B |
| EEPSATVPSQ  | 6128.55       | DSYHLYAYHEELSATVPSQWKKIG     | 4-IMP10 | 4-EPT10C |
| FVADRAGTF   | 40.001        | GDQYKATDFVADWAGTFKMVFTPDKDGS | 4-IMP14 | 4-EPT14A |
| EESGGAVAFS  | 1086.15       | SLTEESGGAVAFFPGNLSTSSSA      | 4-IMP08 | 4-EPT8A  |
| ESGGAVAFS   | 16.00 (%rank) | SLTEESGGAVAFFPGNLSTSSSA      | 4-IMP08 | 4-EPT8B  |
| IPLSDNTIS   | 1437.36       | KLRTIPLSDNTIFRRICTIAKHLE     | 5-IMP05 | 5-EPT5A  |
| REFDEIELA   | 180.19        | PASAKSRREFDKIELAYRR          | 5-IMP23 | 5-EPT23A |
| REFDEIELAY  | 587.96        | PASAKSRREFDKIELAYRR          | 5-IMP23 | 5-EPT23C |
|             |               | SHHTSHYQRYSHPLFLPGHRLDPPI    | 5-IMP01 | 5-EPT1A  |
| IYPHGSTDKL  | 119.28        | DVTGPHLYSIYHGSTDKLPYVTMGS    | 5-IMP17 | 5-EPT17A |
| YPVISKSIM   | 18.76         | ARLQSKEYPVIFKSIMRQLISPQL     | 5-IMP16 | 5-EPT16A |
| KEYPVISIKSI | 68.04         | ARLQSKEYPVIFKSIMRQLISPQL     | 5-IMP16 | 5-EPT16C |
| EYPVISIKSI  | 495.76        | ARLQSKEYPVIFKSIMRQLISPQL     | 5-IMP16 | 5-EPT16D |
| ISKSIMRQL   | 9605.46       | ARLQSKEYPVIFKSIMRQLISPQL     | 5-IMP16 | 5-EPT16E |
| YDHVSALHPV  | 167.71        | LHthydyvsalHPVSTPSKEYTSA     | 5-IMP28 | 5-EPT28A |
| HTHYDHVSAL  | 181.9         | LHthydyvsalHPVSTPSKEYTSA     | 5-IMP28 | 5-EPT28C |
| DHVSALHPV   | 17304.51      | LHthydyvsalHPVSTPSKEYTSA     | 5-IMP28 | 5-EPT28D |
| FPQGLPDEY   | 6.01          | FPVVQSTEDVFPQGLPNEYAFVT      | 5-IMP11 | 5-EPT11A |
| LPDEYAFVTT  | 382.06        | FPVVQSTEDVFPQGLPNEYAFVT      | 5-IMP11 | 5-EPT11C |
| LPDEYAFVT   | 418.9         | FPVVQSTEDVFPQGLPNEYAFVT      | 5-IMP11 | 5-EPT11D |
| DEYAFVTTF   | 1456.57       | FPVVQSTEDVFPQGLPNEYAFVT      | 5-IMP11 | 5-EPT11E |
| QGLPDEYAF   | 2258.5        | FPVVQSTEDVFPQGLPNEYAFVT      | 5-IMP11 | 5-EPT11F |
| ALPRSILLF   | 58.45         | SDAFSGLTALPQSILLFGP          | 5-IMP25 | 5-EPT25A |
| TALPRSILLF  | 57.48         | SDAFSGLTALPQSILLFGP          | 5-IMP25 | 5-EPT25C |
| TALPRSILLF  | 407.98        | SDAFSGLTALPQSILLFGP          | 5-IMP25 | 5-EPT25D |
| SPVSRSHSF   | 22.16         | SHLASLKNNVSPVLRSHSFSDPSPKFA  | 5-IMP18 | 5-EPT18A |
|             |               | SHQIHSYQLYTHPLLHPWDHRD       | 5-IMP02 | 5-EPT2A  |
| LFANPRDSF   | 130.57        | SSPLGRANGRRFANPRDSFSAMGFQR   | 5-IMP29 | 5-EPT29A |
| TIIDNIEEM   | 55.29         | STQHADLTIIDNIKEMNFLRRYK      | 5-IMP26 | 5-EPT26A |
| LSSPGAANLF  | 2033.83       | ASATEPANDSLFSPGAANLFSTYLAR   | 5-IMP07 | 5-EPT7A  |
| SSPGAANLF   | 331.43        | ASATEPANDSLFSPGAANLFSTYLAR   | 5-IMP07 | 5-EPT7C  |



|            |          |                                |                  |
|------------|----------|--------------------------------|------------------|
| QPPAPSPSY  | 106.29   | TAQFAPSPGQPPALSPSYPGHRLPLQQG   | 5-IMP22 5-EPT22A |
| APSPGQPPAP | 7569.25  | TAQFAPSPGQPPALSPSYPGHRLPLQQG   | 5-IMP22 5-EPT22C |
| FPSQRTSWGf | 9.79     | AASAAAFPSQRTSWEFLQSLVSIKQEK    | 5-IMP12          |
| MPFTTVSELV | 99.13    | GSVLQFMPFTTVSELMKVSAMSSPKV     | 5-IMP13 5-EPT13A |
| SELVKVSAM  | 49.31    | GSVLQFMPFTTVSELMKVSAMSSPKV     | 5-IMP13 5-EPT13C |
|            |          | DKGHQFHVHPLLHSGDDLDP           | 5-IMP03 5-EPT3A  |
| MTITPRGTTV | 100.08   | EIHGKCENMTITSRGTTVPTKETVSLG    | 5-IMP30 5-EPT30A |
| RYGIRGFPTI | 8.06     | NQVLASRYGIRGFSTIKIFQKGESPV     | 5-IMP14 5-EPT14A |
| YGIRGFPTI  | 40.59    | NQVLASRYGIRGFSTIKIFQKGESPV     | 5-IMP14 5-EPT14C |
| MAGPEGFQY  | 60.65    | MAGPKGFQYRALYPFRRER            | 5-IMP24 5-EPT24A |
| DMKARQEAL  | 16.55    | VTLNDMKARQKALVRERERQLA         | 6-IMP18 6-EPT18A |
| DMKARQEALV | 310.25   | VTLNDMKARQKALVRERERQLA         | 6-IMP18 6-EPT18B |
| TRKNKKLAP  | 11353.17 | SRLQTRKNKKLALSSTPSNIAPSD       | 6-IMP06 6-EPT6A  |
| QTRKNKKLAP | 12475.27 | SRLQTRKNKKLALSSTPSNIAPSD       | 6-IMP06 6-EPT6B  |
|            |          | LNTGLFRIKFKEPLENLI             | 6-IMP02 6-EPT2A  |
| ISDRLIGIY  | 9.37     | SLRNNMFEISDRFIGIYKTYNITK       | 6-IMP17 6-EPT17A |
| EISDRLIGIY | 30.86    | SLRNNMFEISDRFIGIYKTYNITK       | 6-IMP17 6-EPT17B |
| EISDRLIGI  | 206.72   | SLRNNMFEISDRFIGIYKTYNITK       | 6-IMP17 6-EPT17C |
| QTSIQSPSSY | 166.67   | HLLQKQTSIQSPSLYGNSSPPLNK       | 6-IMP24 6-EPT24A |
| TSIQSPSSY  | 839.46   | HLLQKQTSIQSPSLYGNSSPPLNK       | 6-IMP24 6-EPT24B |
| EMERVFVFPV | 2362.67  | WCTEMKRVFGFPVHYTDVSNMS         | 6-IMP07 6-EPT7A  |
| VVDLKKNLEY | 23.5     | VKQLERGEASVVDLKKNLEYAAT        | 6-IMP19 6-EPT19A |
|            |          | SPQSGGAATLAAQARLQPVHLDVWGEHERG | 6-IMP03 6-EPT3A  |
| HPARHRHLM  | 221.14   | STEVEPKESPHLARHRHLMKTLVKSLST   | 6-IMP25 6-EPT25A |
| HPARHRHLM  | 3969.44  | STEVEPKESPHLARHRHLMKTLVKSLST   | 6-IMP25 6-EPT25A |
| SPHPARHRHL | 752.03   | STEVEPKESPHLARHRHLMKTLVKSLST   | 6-IMP25 6-EPT25F |
| LLDEFVEWY  | 34.84    | DGAWPVLLDKFVEWYKDKQMS          | 6-IMP28 6-EPT28A |
|            |          | GSGSQMPAWRTRGAISASSTQKTPTRL    | 6-IMP04 6-EPT4A  |
| NA         | NA       | GSGSQMPAWRTRGAISASSTQKTPTRL    | 6-IMP04 6-EPT4B  |
| LPVTRKNMPP | 3753.14  | GPLQLPVTRKNMPLPGVVKLPLPGS      | 6-IMP08 6-EPT8A  |
| WTNRILHEY  | 13.06    | TKLKSAPHWTNCILHEYKNLSTS        | 6-IMP21 6-EPT21A |
| WTNRILHEY  | 145.42   | TKLKSAPHWTNCILHEYKNLSTS        | 6-IMP21 6-EPT21A |
| HTLGAASPFM | 124.75   | YLSHTLGAASSFMRPTVPPPQF         | 6-IMP13 6-EPT13A |
| HTLGAASPF  | 168.38   | YLSHTLGAASSFMRPTVPPPQF         | 6-IMP13 6-EPT13B |
| RLFARARPM  | 54.73    | TGKPEMDFVRLAQLFARARPMGLF       | 6-IMP30 6-EPT30A |
| ISSQPQVPFH | 8049.34  | VNGISSQPQVPFYPNLQKSQYYSTV      | 6-IMP11 6-EPT11A |
| SSQPQVPFH  | 14408.59 | VNGISSQPQVPFYPNLQKSQYYSTV      | 6-IMP11 6-EPT11B |
| NVELPRNVL  | 2944.14  | ALLQNVELRRNVLVSPTPLAN          | 6-IMP10 6-EPT10A |
| ESDLDLWV   | 54.91    | FAKGFRESDLNSWPVAPRPLLSV        | 6-IMP23 6-EPT23A |
|            |          | GLTRISIQRAQPLPPCLPSFRPPTALQGLS | 6-IMP05 6-EPT5A  |
| NA         | NA       | GLTRISIQRAQPLPPCLPSFRPPTALQGLS | 6-IMP05 6-EPT5D  |
| ESIKEITNLK | 81.39    | SHKLESIKEITNFKDAKQLL           | 6-IMP29 6-EPT29A |
| SIKEITNLK  | 688.17   | SHKLESIKEITNFKDAKQLL           | 6-IMP29 6-EPT29B |
| ESIKEITNL  | 667.2    | SHKLESIKEITNFKDAKQLL           | 6-IMP29 6-EPT29C |



| Gene expression (TPM) | CD8+ T cell reactivity by IFN-g ELISPOT against |                                       |                  |
|-----------------------|-------------------------------------------------|---------------------------------------|------------------|
|                       | Peptide pulsed autologous APC                   | Minigene expressing autologous B cell | Autologous tumor |
| 1.27                  | 1                                               | 1                                     | 0                |
| 1.27                  | 1                                               | 1                                     | 0                |
| 1.27                  | 0                                               | n.d.                                  | n.d.             |
| 0.58                  | 0                                               | n.d.                                  | n.d.             |
| 0.58                  | 0                                               | n.d.                                  | n.d.             |
| 16.67                 | 0                                               | n.d.                                  | n.d.             |
| 2.78                  | 0                                               | n.d.                                  | n.d.             |
| 16.02                 | 1                                               | 1                                     | 0                |
| 16.02                 | 0                                               | n.d.                                  | n.d.             |
| 16.02                 | 0                                               | n.d.                                  | n.d.             |
| 16.02                 | 0                                               | n.d.                                  | n.d.             |
| 2.26                  | 0                                               | n.d.                                  | n.d.             |
| 2.26                  | 0                                               | n.d.                                  | n.d.             |
| 2.26                  | 0                                               | n.d.                                  | n.d.             |
| 2.26                  | 0                                               | n.d.                                  | n.d.             |
| 2.26                  | 0                                               | n.d.                                  | n.d.             |
| 2.26                  | 0                                               | n.d.                                  | n.d.             |
| 11.09                 | 0                                               | n.d.                                  | n.d.             |
| 1.02                  | n.d.                                            | n.d.                                  | n.d.             |
| 1.33                  | 0                                               | n.d.                                  | n.d.             |
| 1.33                  | 0                                               | n.d.                                  | n.d.             |
| 103.21                | 0                                               | n.d.                                  | n.d.             |
| 103.21                | 0                                               | n.d.                                  | n.d.             |
| 1.02                  | n.d.                                            | n.d.                                  | n.d.             |
| 239.78                | 0                                               | n.d.                                  | n.d.             |
| 6.67                  | 0                                               | n.d.                                  | n.d.             |
| 6.67                  | 0                                               | n.d.                                  | n.d.             |
| 2.23                  | 0                                               | n.d.                                  | n.d.             |
| 2.23                  | n.d.                                            | n.d.                                  | n.d.             |
| 4.97                  | 0                                               | n.d.                                  | n.d.             |
| 35.26                 | 0                                               | n.d.                                  | n.d.             |
| 2.27                  | 0                                               | n.d.                                  | n.d.             |
| 2.23                  | 0                                               | n.d.                                  | n.d.             |
| 2.23                  | 0                                               | n.d.                                  | n.d.             |
| 2.23                  | n.d.                                            | n.d.                                  | n.d.             |
| 21.78                 | 1                                               | 1                                     | 0                |
| 151.61                | 0                                               | n.d.                                  | n.d.             |
| 151.61                | 0                                               | n.d.                                  | n.d.             |
| 2.23                  | n.d.                                            | n.d.                                  | n.d.             |

|        |      |      |      |
|--------|------|------|------|
| 51.89  | 0    | n.d. | n.d. |
| 277.14 | 1    | 1    | 1    |
| 8.47   | 0    | n.d. | n.d. |
| 38.85  | 0    | n.d. | n.d. |
| 38.85  | 0    | n.d. | n.d. |
| 38.85  | 0    | n.d. | n.d. |
| 4.97   | 0    | n.d. | n.d. |
| 4.97   | 0    | n.d. | n.d. |
| 2.81   | 0    | n.d. | n.d. |
| 8.90   | n.d. | n.d. | n.d. |
| 13.58  | 0    | n.d. | n.d. |
| 13.58  | 0    | n.d. | n.d. |
| 13.58  | 0    | n.d. | n.d. |
| 0.89   | 0    | n.d. | n.d. |
| 5.13   | 0    | n.d. | n.d. |
| 5.13   | 0    | n.d. | n.d. |
| 5.13   | 0    | n.d. | n.d. |
| 5.13   | 0    | n.d. | n.d. |
| 0.54   | 0    | n.d. | n.d. |
| 0.54   | 0    | n.d. | n.d. |
| 61.30  | 0    | n.d. | n.d. |
| 0.28   | 0    | n.d. | n.d. |
| 0.28   | 0    | n.d. | n.d. |
| 38.98  | 0    | n.d. | n.d. |
| 100.74 | 1    | 1    | 0    |
| 100.74 | 0    | n.d. | n.d. |
| 2.83   | 0    | n.d. | n.d. |
| 2.83   | 1    | 1    | 0    |
| 5.01   | 0    | n.d. | n.d. |
| 36.88  | 0    | n.d. | n.d. |
| 36.88  | 1    | 1    | 0    |
| 2.92   | 0    | n.d. | n.d. |
| 39.59  | 0    | n.d. | n.d. |
| 39.59  | 0    | n.d. | n.d. |
| 39.59  | 0    | n.d. | n.d. |
| 5.21   | 0    | n.d. | n.d. |
| 1.91   | 0    | n.d. | n.d. |
| 6.35   | 1    | 1    | 0    |
| 6.35   | 0    | n.d. | n.d. |
| 6.35   | 0    | n.d. | n.d. |
| 6.35   | 0    | n.d. | n.d. |
| 6.35   | 1    | 1    | 0    |
| 6.35   | 0    | n.d. | n.d. |
| 6.35   | 0    | n.d. | n.d. |
| 2.36   | 0    | n.d. | n.d. |

|       |   |      |      |
|-------|---|------|------|
| 2.36  | 0 | n.d. | n.d. |
| 5.34  | 0 | n.d. | n.d. |
| 6.35  | 0 | n.d. | n.d. |
| 6.35  | 0 | n.d. | n.d. |
| 4.04  | 0 | n.d. | n.d. |
| 4.04  | 0 | n.d. | n.d. |
| 1.70  | 0 | n.d. | n.d. |
| 43.37 | 0 | n.d. | n.d. |
| 9.84  | 0 | n.d. | n.d. |
| 9.84  | 0 | n.d. | n.d. |
| 9.84  | 0 | n.d. | n.d. |
| 0.20  | 0 | n.d. | n.d. |
| 0.20  | 0 | n.d. | n.d. |
| 0.20  | 0 | n.d. | n.d. |
| 4.93  | 0 | n.d. | n.d. |
| 4.93  | 0 | n.d. | n.d. |
| 4.93  | 0 | n.d. | n.d. |
| 4.96  | 0 | n.d. | n.d. |
| 1.50  | 0 | n.d. | n.d. |
| 1.50  | 0 | n.d. | n.d. |
| 1.15  | 1 | 1    | 0    |
| 3.52  | 0 | n.d. | n.d. |
| 3.52  | 1 | 1    | 0    |
| 0.03  | 0 | n.d. | n.d. |
| 23.45 | 0 | n.d. | n.d. |
| 0.84  | 1 | 1    | 0    |
| 0.84  | 0 | n.d. | n.d. |
| 0.84  | 0 | n.d. | n.d. |
| 0.84  | 0 | n.d. | n.d. |
| 0.35  | 0 | n.d. | n.d. |
| 0.35  | 0 | n.d. | n.d. |
| 0.35  | 0 | n.d. | n.d. |
| 10.68 | 1 | 0    | 0    |
| 10.68 | 1 | 1    | 0    |
| 10.68 | 1 | 1    | 0    |
| 10.68 | 0 | n.d. | n.d. |
| 10.68 | 0 | n.d. | n.d. |
| 1.45  | 0 | n.d. | n.d. |
| 1.45  | 0 | n.d. | n.d. |
| 1.45  | 0 | n.d. | n.d. |
| 84.58 | 0 | n.d. | n.d. |
| 0.03  | 0 | n.d. | n.d. |
| 9.65  | 0 | n.d. | n.d. |
| 1.70  | 0 | n.d. | n.d. |
| 10.43 | 0 | n.d. | n.d. |
| 10.43 | 0 | n.d. | n.d. |

|       |      |      |      |
|-------|------|------|------|
| 8.44  | 0    | n.d. | n.d. |
| 8.44  | 0    | n.d. | n.d. |
| 12.40 | n.d. | n.d. | n.d. |
| 8.66  | 0    | n.d. | n.d. |
| 8.66  | 0    | n.d. | n.d. |
| 0.03  | 0    | n.d. | n.d. |
| 0.64  | 0    | n.d. | n.d. |
| 54.95 | 0    | n.d. | n.d. |
| 54.95 | 0    | n.d. | n.d. |
| 17.74 | 0    | n.d. | n.d. |
| 4.82  | 0    | n.d. | n.d. |
| 4.82  | 1    | 1    | 0    |
| 45.97 | 0    | n.d. | n.d. |
| 45.97 | 0    | n.d. | n.d. |
| 37.52 | 1    | 1    | 0    |
| 34.73 | 0    | n.d. | n.d. |
| 34.73 | 0    | n.d. | n.d. |
| 34.73 | 0    | n.d. | n.d. |
| 5.27  | 0    | n.d. | n.d. |
| 5.27  | 0    | n.d. | n.d. |
| 7.57  | 0    | n.d. | n.d. |
| 11.65 | 0    | n.d. | n.d. |
| 8.27  | 0    | n.d. | n.d. |
| 23.40 | 0    | n.d. | n.d. |
| 23.40 | 0    | n.d. | n.d. |
| 23.40 | 0    | n.d. | n.d. |
| 6.50  | 0    | n.d. | n.d. |
| 14.27 | 0    | n.d. | n.d. |
| 14.27 | 0    | n.d. | n.d. |
| 12.79 | 0    | n.d. | n.d. |
| 43.27 | 0    | n.d. | n.d. |
| 43.27 | 0    | n.d. | n.d. |
| 41.28 | 0    | n.d. | n.d. |
| 41.28 | 0    | n.d. | n.d. |
| NA    | 0    | n.d. | n.d. |
| 9.56  | 0    | n.d. | n.d. |
| 9.56  | 0    | n.d. | n.d. |
| 20.76 | 0    | n.d. | n.d. |
| 0.15  | 0    | n.d. | n.d. |
| 89.05 | 0    | n.d. | n.d. |
| 89.05 | 0    | n.d. | n.d. |
| 50.90 | 0    | n.d. | n.d. |
| 50.90 | 0    | n.d. | n.d. |
| 50.90 | 0    | n.d. | n.d. |

---











---









---











---











---
