# Supplementary material
Source: PubMed Central journal article supplement (PMC5577644)
Supplement: NIHMS892660-supplement-Supp_5.pdf [file NIHMS892660-supplement-Supp_5.pdf]

|   |                |          |         |                             |
|---|----------------|----------|---------|-----------------------------|
| 4 | <i>MTERFD2</i> | p.F263Y  | 4-IMP18 | SVLREDLGQLEYKYQYAYFRMGIKHPD |
| 4 | <i>MGA</i>     | p.N2653D | 4-IMP17 | PENDDLFMMPRIVDVTSLATEGG     |
| 4 | <i>MGA</i>     | p.N2653D | 4-IMP17 | PENDDLFMMPRIVDVTSLATEGG     |
| 4 | <i>MGA</i>     | p.N2653D | 4-IMP17 | PENDDLFMMPRIVDVTSLATEGG     |
| 4 | <i>MGA</i>     | p.N2653D | 4-IMP17 | PENDDLFMMPRIVDVTSLATEGG     |
| 4 | <i>MGA</i>     | p.N2653D | 4-IMP17 | PENDDLFMMPRIVDVTSLATEGG     |
| 4 | <i>MGA</i>     | p.N2653D | 4-IMP17 | PENDDLFMMPRIVDVTSLATEGG     |
| 4 | <i>MGA</i>     | p.N2653D | 4-IMP17 | PENDDLFMMPRIVDVTSLATEGG     |
| 4 | <i>MGA</i>     | p.N2653D | 4-IMP17 | PENDDLFMMPRIVDVTSLATEGG     |
| 4 | <i>MGA</i>     | p.N2653D | 4-IMP17 | PENDDLFMMPRIVDVTSLATEGG     |
| 4 | <i>MGA</i>     | p.N2653D | 4-IMP17 | PENDDLFMMPRIVDVTSLATEGG     |
| 4 | <i>SSB</i>     | p.K134E  | 4-IMP09 | TLDDIKEWLEDEGQVLNIQMRRTLHK  |
| 4 | <i>SSB</i>     | p.K134E  | 4-IMP09 | TLDDIKEWLEDEGQVLNIQMRRTLHK  |
| 4 | <i>SSB</i>     | p.K134E  | 4-IMP09 | TLDDIKEWLEDEGQVLNIQMRRTLHK  |
| 4 | <i>SSB</i>     | p.K134E  | 4-IMP09 | TLDDIKEWLEDEGQVLNIQMRRTLHK  |
| 4 | <i>SSB</i>     | p.K134E  | 4-IMP09 | TLDDIKEWLEDEGQVLNIQMRRTLHK  |
| 4 | <i>PATL1</i>   | p.F288Y  | 4-IMP30 | GRMSPSQFARVPGYVGSPLAAMNPK   |
| 4 | <i>PATL1</i>   | p.F288Y  | 4-IMP30 | GRMSPSQFARVPGYVGSPLAAMNPK   |
| 4 | <i>PATL1</i>   | p.F288Y  | 4-IMP30 | GRMSPSQFARVPGYVGSPLAAMNPK   |
| 4 | <i>PATL1</i>   | p.F288Y  | 4-IMP30 | GRMSPSQFARVPGYVGSPLAAMNPK   |
| 4 | <i>SMCHD1</i>  | p.G425E  | 4-IMP07 | KAHVEGDGVVEEIIRYHPFLYDRET   |
| 4 | <i>SMCHD1</i>  | p.G425E  | 4-IMP07 | KAHVEGDGVVEEIIRYHPFLYDRET   |
| 4 | <i>SMCHD1</i>  | p.G425E  | 4-IMP07 | KAHVEGDGVVEEIIRYHPFLYDRET   |
| 4 | <i>SMCHD1</i>  | p.G425E  | 4-IMP07 | KAHVEGDGVVEEIIRYHPFLYDRET   |
| 4 | <i>SMCHD1</i>  | p.G425E  | 4-IMP07 | KAHVEGDGVVEEIIRYHPFLYDRET   |
| 4 | <i>SMCHD1</i>  | p.G425E  | 4-IMP07 | KAHVEGDGVVEEIIRYHPFLYDRET   |
| 4 | <i>SMCHD1</i>  | p.G425E  | 4-IMP07 | KAHVEGDGVVEEIIRYHPFLYDRET   |
| 4 | <i>SMCHD1</i>  | p.G425E  | 4-IMP07 | KAHVEGDGVVEEIIRYHPFLYDRET   |
| 4 | <i>SMCHD1</i>  | p.G425E  | 4-IMP07 | KAHVEGDGVVEEIIRYHPFLYDRET   |
| 4 | <i>SMCHD1</i>  | p.G425E  | 4-IMP07 | KAHVEGDGVVEEIIRYHPFLYDRET   |
| 4 | <i>TNR</i>     | p.R1007W | 4-IMP21 | DGVSEEFWLDLLPSTHYT          |
| 4 | <i>TNR</i>     | p.R1007W | 4-IMP21 | DGVSEEFWLDLLPSTHYT          |
| 4 | <i>TNR</i>     | p.R1007W | 4-IMP21 | DGVSEEFWLDLLPSTHYT          |
| 4 | <i>TNR</i>     | p.R1007W | 4-IMP21 | DGVSEEFWLDLLPSTHYT          |
| 4 | <i>TNR</i>     | p.R1007W | 4-IMP21 | DGVSEEFWLDLLPSTHYT          |
| 4 | <i>TNR</i>     | p.R1007W | 4-IMP21 | DGVSEEFWLDLLPSTHYT          |
| 4 | <i>TNR</i>     | p.R1007W | 4-IMP21 | DGVSEEFWLDLLPSTHYT          |
| 4 | <i>TNR</i>     | p.R1007W | 4-IMP21 | DGVSEEFWLDLLPSTHYT          |
| 4 | <i>TNR</i>     | p.R1007W | 4-IMP21 | DGVSEEFWLDLLPSTHYT          |
| 4 | <i>TNR</i>     | p.R1007W | 4-IMP21 | DGVSEEFWLDLLPSTHYT          |
| 4 | <i>TNR</i>     | p.R1007W | 4-IMP21 | DGVSEEFWLDLLPSTHYT          |
| 4 | <i>TNR</i>     | p.R1007W | 4-IMP21 | DGVSEEFWLDLLPSTHYT          |
| 4 | <i>TNR</i>     | p.R1007W | 4-IMP21 | DGVSEEFWLDLLPSTHYT          |
| 4 | <i>TNR</i>     | p.R1007W | 4-IMP21 | DGVSEEFWLDLLPSTHYT          |
| 4 | <i>TNR</i>     | p.R1007W | 4-IMP21 | DGVSEEFWLDLLPSTHYT          |
| 4 | <i>TNR</i>     | p.R1007W | 4-IMP21 | DGVSEEFWLDLLPSTHYT          |
| 4 | <i>TNR</i>     | p.R1007W | 4-IMP21 | DGVSEEFWLDLLPSTHYT          |
| 4 | <i>TNR</i>     | p.R1007W | 4-IMP21 | DGVSEEFWLDLLPSTHYT          |
| 4 | <i>ATF7IP</i>  | p.P1205L | 4-IMP10 | DSYHLYAYHEELSATVPSQWKKIG    |
| 4 | <i>ATF7IP</i>  | p.P1205L | 4-IMP10 | DSYHLYAYHEELSATVPSQWKKIG    |
| 4 | <i>ATF7IP</i>  | p.P1205L | 4-IMP10 | DSYHLYAYHEELSATVPSQWKKIG    |

|   |                |          |         |                              |
|---|----------------|----------|---------|------------------------------|
| 4 | <i>ATF7IP</i>  | p.P1205L | 4-IMP10 | DSYHLYAYHEELSATVPSQWKKIG     |
| 4 | <i>ATF7IP</i>  | p.P1205L | 4-IMP10 | DSYHLYAYHEELSATVPSQWKKIG     |
| 4 | <i>ATF7IP</i>  | p.P1205L | 4-IMP10 | DSYHLYAYHEELSATVPSQWKKIG     |
| 4 | <i>ATF7IP</i>  | p.P1205L | 4-IMP10 | DSYHLYAYHEELSATVPSQWKKIG     |
| 4 | <i>IDH2</i>    | p.R188W  | 4-IMP14 | GDQYKATDFVADWAGTFKMVFTPKDGSG |
| 4 | <i>IDH2</i>    | p.R188W  | 4-IMP14 | GDQYKATDFVADWAGTFKMVFTPKDGSG |
| 4 | <i>IDH2</i>    | p.R188W  | 4-IMP14 | GDQYKATDFVADWAGTFKMVFTPKDGSG |
| 4 | <i>IDH2</i>    | p.R188W  | 4-IMP14 | GDQYKATDFVADWAGTFKMVFTPKDGSG |
| 4 | <i>IDH2</i>    | p.R188W  | 4-IMP14 | GDQYKATDFVADWAGTFKMVFTPKDGSG |
| 4 | <i>IDH2</i>    | p.R188W  | 4-IMP14 | GDQYKATDFVADWAGTFKMVFTPKDGSG |
| 4 | <i>IDH2</i>    | p.R188W  | 4-IMP14 | GDQYKATDFVADWAGTFKMVFTPKDGSG |
| 4 | <i>IDH2</i>    | p.R188W  | 4-IMP14 | GDQYKATDFVADWAGTFKMVFTPKDGSG |
| 4 | <i>IDH2</i>    | p.R188W  | 4-IMP14 | GDQYKATDFVADWAGTFKMVFTPKDGSG |
| 4 | <i>MMP17</i>   | p.G511E  | 4-IMP23 | EYWKVLDGELEVAPEYPQSTARDWL    |
| 4 | <i>MMP17</i>   | p.G511E  | 4-IMP23 | EYWKVLDGELEVAPEYPQSTARDWL    |
| 4 | <i>MMP17</i>   | p.G511E  | 4-IMP23 | EYWKVLDGELEVAPEYPQSTARDWL    |
| 4 | <i>RNF40</i>   | p.P584L  | 4-IMP12 | TTTSVKKEELVLSEEDFQGITPGAQ    |
| 4 | <i>RNF40</i>   | p.P584L  | 4-IMP12 | TTTSVKKEELVLSEEDFQGITPGAQ    |
| 4 | <i>RNF40</i>   | p.P584L  | 4-IMP12 | TTTSVKKEELVLSEEDFQGITPGAQ    |
| 4 | <i>RNF40</i>   | p.P584L  | 4-IMP12 | TTTSVKKEELVLSEEDFQGITPGAQ    |
| 4 | <i>RNF40</i>   | p.P584L  | 4-IMP12 | TTTSVKKEELVLSEEDFQGITPGAQ    |
| 4 | <i>RNF40</i>   | p.P584L  | 4-IMP12 | TTTSVKKEELVLSEEDFQGITPGAQ    |
| 4 | <i>RNF40</i>   | p.P584L  | 4-IMP12 | TTTSVKKEELVLSEEDFQGITPGAQ    |
| 4 | <i>RNF40</i>   | p.P584L  | 4-IMP12 | TTTSVKKEELVLSEEDFQGITPGAQ    |
| 4 | <i>RNF40</i>   | p.P584L  | 4-IMP12 | TTTSVKKEELVLSEEDFQGITPGAQ    |
| 4 | <i>RNF40</i>   | p.P584L  | 4-IMP12 | TTTSVKKEELVLSEEDFQGITPGAQ    |
| 4 | <i>RNF40</i>   | p.P584L  | 4-IMP12 | TTTSVKKEELVLSEEDFQGITPGAQ    |
| 4 | <i>RNF40</i>   | p.P584L  | 4-IMP12 | TTTSVKKEELVLSEEDFQGITPGAQ    |
| 4 | <i>RNF40</i>   | p.P584L  | 4-IMP12 | TTTSVKKEELVLSEEDFQGITPGAQ    |
| 4 | <i>RNF40</i>   | p.P584L  | 4-IMP12 | TTTSVKKEELVLSEEDFQGITPGAQ    |
| 4 | <i>RPTOR</i>   | p.S755F  | 4-IMP08 | SLTEESGGAVAFFPGNLSTSSSA      |
| 5 | <i>FAM200A</i> | p.S116F  | 5-IMP05 | KLRTIPLSDNTIFRRICTIAKHLE     |
| 5 | <i>FAM200A</i> | p.S116F  | 5-IMP05 | KLRTIPLSDNTIFRRICTIAKHLE     |
| 5 | <i>FAM200A</i> | p.S116F  | 5-IMP05 | KLRTIPLSDNTIFRRICTIAKHLE     |
| 5 | <i>FAM200A</i> | p.S116F  | 5-IMP05 | KLRTIPLSDNTIFRRICTIAKHLE     |
| 5 | <i>MUC5B</i>   | NeoORF   | 5-IMP01 | SHHTHSYQRYSHPLFLPGHRLDPPI    |
| 5 | <i>MUC5B</i>   | NeoORF   | 5-IMP01 | SHHTHSYQRYSHPLFLPGHRLDPPI    |
| 5 | <i>MUC5B</i>   | NeoORF   | 5-IMP01 | SHHTHSYQRYSHPLFLPGHRLDPPI    |
| 5 | <i>MUC5B</i>   | NeoORF   | 5-IMP01 | SHHTHSYQRYSHPLFLPGHRLDPPI    |
| 5 | <i>MUC5B</i>   | NeoORF   | 5-IMP01 | SHHTHSYQRYSHPLFLPGHRLDPPI    |
| 5 | <i>MUC5B</i>   | NeoORF   | 5-IMP01 | SHHTHSYQRYSHPLFLPGHRLDPPI    |
| 5 | <i>MUC5B</i>   | NeoORF   | 5-IMP01 | SHHTHSYQRYSHPLFLPGHRLDPPI    |
| 5 | <i>MUC5B</i>   | NeoORF   | 5-IMP01 | SHHTHSYQRYSHPLFLPGHRLDPPI    |
| 5 | <i>MUC5B</i>   | NeoORF   | 5-IMP01 | SHHTHSYQRYSHPLFLPGHRLDPPI    |
| 5 | <i>MUC5B</i>   | NeoORF   | 5-IMP01 | SHHTHSYQRYSHPLFLPGHRLDPPI    |
| 5 | <i>MUC5B</i>   | NeoORF   | 5-IMP01 | SHHTHSYQRYSHPLFLPGHRLDPPI    |
| 5 | <i>MUC5B</i>   | NeoORF   | 5-IMP01 | SHHTHSYQRYSHPLFLPGHRLDPPI    |
| 5 | <i>PSMB7</i>   | p.P158L  | 5-IMP17 | DVTGPHLYSIYLHGSTDKLPYVTMGS   |
| 5 | <i>PSMB7</i>   | p.P158L  | 5-IMP17 | DVTGPHLYSIYLHGSTDKLPYVTMGS   |
| 5 | <i>PSMB7</i>   | p.P158L  | 5-IMP17 | DVTGPHLYSIYLHGSTDKLPYVTMGS   |
| 5 | <i>PSMB7</i>   | p.P158L  | 5-IMP17 | DVTGPHLYSIYLHGSTDKLPYVTMGS   |







|   |                |          |         |                              |
|---|----------------|----------|---------|------------------------------|
| 5 | <i>PDIA6</i>   | p.P290S  | 5-IMP14 | NQVLASRYGIRGFSTIKIFQKGESPV   |
| 5 | <i>PDIA6</i>   | p.P290S  | 5-IMP14 | NQVLASRYGIRGFSTIKIFQKGESPV   |
| 5 | <i>PDIA6</i>   | p.P290S  | 5-IMP14 | NQVLASRYGIRGFSTIKIFQKGESPV   |
| 5 | <i>PDIA6</i>   | p.P290S  | 5-IMP14 | NQVLASRYGIRGFSTIKIFQKGESPV   |
| 5 | <i>PDIA6</i>   | p.P290S  | 5-IMP14 | NQVLASRYGIRGFSTIKIFQKGESPV   |
| 5 | <i>PDIA6</i>   | p.P290S  | 5-IMP14 | NQVLASRYGIRGFSTIKIFQKGESPV   |
| 5 | <i>PDIA6</i>   | p.P290S  | 5-IMP14 | NQVLASRYGIRGFSTIKIFQKGESPV   |
| 5 | <i>PIK3R2</i>  | p.E5K    | 5-IMP24 | MAGPKGFQYRALYPFRER           |
| 5 | <i>PIK3R2</i>  | p.E5K    | 5-IMP24 | MAGPKGFQYRALYPFRER           |
| 5 | <i>PIK3R2</i>  | p.E5K    | 5-IMP24 | MAGPKGFQYRALYPFRER           |
| 5 | <i>PIK3R2</i>  | p.E5K    | 5-IMP24 | MAGPKGFQYRALYPFRER           |
| 5 | <i>PIK3R2</i>  | p.E5K    | 5-IMP24 | MAGPKGFQYRALYPFRER           |
| 5 | <i>PIK3R2</i>  | p.E5K    | 5-IMP24 | MAGPKGFQYRALYPFRER           |
| 5 | <i>PIK3R2</i>  | p.E5K    | 5-IMP24 | MAGPKGFQYRALYPFRER           |
| 5 | <i>PIK3R2</i>  | p.E5K    | 5-IMP24 | MAGPKGFQYRALYPFRER           |
| 6 | <i>FAM50B</i>  | p.E78K   | 6-IMP18 | VTLNDMKARQKALVRERERQLA       |
| 6 | <i>FAM50B</i>  | p.E78K   | 6-IMP18 | VTLNDMKARQKALVRERERQLA       |
| 6 | <i>MLL</i>     | p.P3239L | 6-IMP06 | SRLQTRKNKKLALSSTPSNIAPSD     |
| 6 | <i>MLL</i>     | p.P3239L | 6-IMP06 | SRLQTRKNKKLALSSTPSNIAPSD     |
| 6 | <i>MLL</i>     | p.P3239L | 6-IMP06 | SRLQTRKNKKLALSSTPSNIAPSD     |
| 6 | <i>MLL</i>     | p.P3239L | 6-IMP06 | SRLQTRKNKKLALSSTPSNIAPSD     |
| 6 | <i>MLL</i>     | p.P3239L | 6-IMP06 | SRLQTRKNKKLALSSTPSNIAPSD     |
| 6 | <i>MLL</i>     | p.P3239L | 6-IMP06 | SRLQTRKNKKLALSSTPSNIAPSD     |
| 6 | <i>RALGAPB</i> | NeoORF   | 6-IMP02 | LNTGLFRIKFKEPLENLI           |
| 6 | <i>RALGAPB</i> | NeoORF   | 6-IMP02 | LNTGLFRIKFKEPLENLI           |
| 6 | <i>RALGAPB</i> | NeoORF   | 6-IMP02 | LNTGLFRIKFKEPLENLI           |
| 6 | <i>RALGAPB</i> | NeoORF   | 6-IMP02 | LNTGLFRIKFKEPLENLI           |
| 6 | <i>SMC4</i>    | p.L1262F | 6-IMP17 | SLRNNMFEISDRFIGIYKTYNITK     |
| 6 | <i>SMC4</i>    | p.L1262F | 6-IMP17 | SLRNNMFEISDRFIGIYKTYNITK     |
| 6 | <i>SMC4</i>    | p.L1262F | 6-IMP17 | SLRNNMFEISDRFIGIYKTYNITK     |
| 6 | <i>SMC4</i>    | p.L1262F | 6-IMP17 | SLRNNMFEISDRFIGIYKTYNITK     |
| 6 | <i>SMC4</i>    | p.L1262F | 6-IMP17 | SLRNNMFEISDRFIGIYKTYNITK     |
| 6 | <i>SMC4</i>    | p.L1262F | 6-IMP17 | SLRNNMFEISDRFIGIYKTYNITK     |
| 6 | <i>DNMT3A</i>  | p.E865K  | 6-IMP07 | WCTEMKRVFGFPVHYTDVSNMS       |
| 6 | <i>PDE1C</i>   | p.L121F  | 6-IMP19 | VKQLERGEASVDFKKNLEYAAT       |
| 6 | <i>PDE1C</i>   | p.L121F  | 6-IMP19 | VKQLERGEASVDFKKNLEYAAT       |
| 6 | <i>PDE1C</i>   | p.L121F  | 6-IMP19 | VKQLERGEASVDFKKNLEYAAT       |
| 6 | <i>TEX2</i>    | p.P207L  | 6-IMP25 | STEVEPKESPHLARHRHLMKTLVKSLST |
| 6 | <i>TEX2</i>    | p.P207L  | 6-IMP25 | STEVEPKESPHLARHRHLMKTLVKSLST |
| 6 | <i>TSHR</i>    | p.G464R  | 6-IMP12 | LMSNLAFADFCMRMYL             |
| 6 | <i>TSHR</i>    | p.G464R  | 6-IMP12 | LMSNLAFADFCMRMYL             |
| 6 | <i>KRIT1</i>   | p.R600C  | 6-IMP21 | TKLKSAPHWTNCILHEYKNLSTS      |
| 6 | <i>KRIT1</i>   | p.R600C  | 6-IMP21 | TKLKSAPHWTNCILHEYKNLSTS      |
| 6 | <i>KRIT1</i>   | p.R600C  | 6-IMP21 | TKLKSAPHWTNCILHEYKNLSTS      |
| 6 | <i>MGAT4B</i>  | p.P458L  | 6-IMP16 | PAAGDFIRFRFFQLRLRERFF        |
| 6 | <i>MGAT4B</i>  | p.P458L  | 6-IMP16 | PAAGDFIRFRFFQLRLRERFF        |
| 6 | <i>MGAT4B</i>  | p.P458L  | 6-IMP16 | PAAGDFIRFRFFQLRLRERFF        |
| 6 | <i>MGAT4B</i>  | p.P458L  | 6-IMP16 | PAAGDFIRFRFFQLRLRERFF        |



peptides for Patients 1-6

| Binding Peptide | HLA allele                | Prediction method            | Percentile rank |
|-----------------|---------------------------|------------------------------|-----------------|
| LAKKLFVTLVFRHG  | HLA-DPA1*01:03/DPB1*04:01 | NetMHCIIpan                  | 1.64            |
| AKKLFVTLVFRHGD  | HLA-DPA1*01:03/DPB1*04:01 | NetMHCIIpan                  | 1.84            |
| VLAKKLFVTLVFRH  | HLA-DPA1*01:03/DPB1*04:01 | NetMHCIIpan                  | 2.01            |
| KKLFVTLVFRHGDR  | HLA-DPA1*01:03/DPB1*04:01 | NetMHCIIpan                  | 2.01            |
| KLKLVTLVFRHGDRS | HLA-DPA1*01:03/DPB1*04:01 | NetMHCIIpan                  | 3.27            |
| SVLAKKLFVTLVFR  | HLA-DPA1*01:03/DPB1*04:01 | NetMHCIIpan                  | 4.4             |
| LKFVTLVFRHGDRSP | HLA-DPA1*01:03/DPB1*04:01 | NetMHCIIpan                  | 5.79            |
| RSVLAKKLFVTLVF  | HLA-DPA1*01:03/DPB1*04:01 | NetMHCIIpan                  | 7.53            |
| LAKKLFVTLVFRHG  | HLA-DRB1*04:04            | Consensus (smm/nn/sturniolo) | 8.02            |
| AKKLFVTLVFRHGD  | HLA-DRB1*04:04            | Consensus (smm/nn/sturniolo) | 8.02            |
| KKLFVTLVFRHGDR  | HLA-DRB1*04:04            | Consensus (smm/nn/sturniolo) | 8.02            |
| KLKLVTLVFRHGDRS | HLA-DRB1*04:04            | Consensus (smm/nn/sturniolo) | 8.94            |
| LKFVTLVFRHGDRSP | HLA-DRB1*04:04            | Consensus (smm/nn/sturniolo) | 9.12            |
| KLKLVTLVFRHGDRS | HLA-DRB1*04:01            | Consensus (smm/nn/sturniolo) | 9.16            |
| SVLAKKLFVTLVFR  | HLA-DRB1*04:04            | Consensus (smm/nn/sturniolo) | 9.22            |
| VLAKKLFVTLVFRH  | HLA-DRB1*04:04            | Consensus (smm/nn/sturniolo) | 9.28            |
| KKLFVTLVFRHGDR  | HLA-DRB1*04:01            | Consensus (smm/nn/sturniolo) | 9.56            |
| KKKWLFLQDSKKIQV | HLA-DRB1*04:01            | Consensus (smm/nn/sturniolo) | 1.05            |
| KKWLFLQDSKKIQVE | HLA-DRB1*04:01            | Consensus (smm/nn/sturniolo) | 1.51            |
| SKKKWLFLQDSKKIQ | HLA-DRB1*04:01            | Consensus (smm/nn/sturniolo) | 1.56            |
| NSKKWLFLQDSKKI  | HLA-DRB1*04:01            | Consensus (smm/nn/sturniolo) | 2.22            |
| KKKWLFLQDSKKIQV | HLA-DPA1*01:03/DPB1*04:01 | NetMHCIIpan                  | 3.37            |
| SKKKWLFLQDSKKIQ | HLA-DPA1*01:03/DPB1*04:01 | NetMHCIIpan                  | 3.47            |
| NSKKWLFLQDSKKI  | HLA-DPA1*01:03/DPB1*04:01 | NetMHCIIpan                  | 3.68            |
| KWLFLQDSKKIQVEQ | HLA-DRB1*04:01            | Consensus (smm/nn/sturniolo) | 3.68            |
| KKWLFLQDSKKIQVE | HLA-DPA1*01:03/DPB1*04:01 | NetMHCIIpan                  | 5.02            |
| NNSKKWLFLQDSKK  | HLA-DPA1*01:03/DPB1*04:01 | NetMHCIIpan                  | 5.69            |
| WLFLQDSKKIQVEQP | HLA-DRB1*04:01            | Consensus (smm/nn/sturniolo) | 8.31            |
| KWLFLQDSKKIQVEQ | HLA-DPA1*01:03/DPB1*04:01 | NetMHCIIpan                  | 8.37            |
| SPIKLVQKVASKIPF | HLA-DRB1*04:04            | Consensus (smm/nn/sturniolo) | 5.53            |
| IKLVQKVASKIPFPD | HLA-DRB1*04:04            | Consensus (smm/nn/sturniolo) | 5.53            |
| PIKLVQKVASKIPFP | HLA-DRB1*04:04            | Consensus (smm/nn/sturniolo) | 6.11            |
| HTELERFLEYLPLRF | HLA-DPA1*01:03/DPB1*04:01 | NetMHCIIpan                  | 0.36            |
| VILLHTELERFLEYL | HLA-DPA1*01:03/DPB1*04:01 | NetMHCIIpan                  | 0.67            |
| LLHTELERFLEYLPL | HLA-DPA1*01:03/DPB1*04:01 | NetMHCIIpan                  | 0.74            |
| LHTELERFLEYLPLR | HLA-DPA1*01:03/DPB1*04:01 | NetMHCIIpan                  | 0.86            |
| ILLHTELERFLEYLP | HLA-DPA1*01:03/DPB1*04:01 | NetMHCIIpan                  | 0.92            |
| QVILLHTELERFLEY | HLA-DPA1*01:03/DPB1*04:01 | NetMHCIIpan                  | 1.12            |
| RQVILLHTELERFLE | HLA-DPA1*01:03/DPB1*04:01 | NetMHCIIpan                  | 1.67            |
| KRQVILLHTELERFL | HLA-DPA1*01:03/DPB1*04:01 | NetMHCIIpan                  | 1.76            |
| KRQVILLHTELERFL | HLA-DRB1*04:04            | Consensus (smm/nn/sturniolo) | 3.32            |
| RQVILLHTELERFLE | HLA-DRB1*04:04            | Consensus (smm/nn/sturniolo) | 3.38            |

|                 |                           |                              |      |
|-----------------|---------------------------|------------------------------|------|
| TKRQVILLHTELERF | HLA-DRB1*04:04            | Consensus (smm/nn/sturniolo) | 3.54 |
| TKRQVILLHTELERF | HLA-DPA1*01:03/DPB1*04:01 | NetMHCIIpan                  | 4.07 |
| QVILLHTELERFLEY | HLA-DRB1*04:04            | Consensus (smm/nn/sturniolo) | 8.28 |
| VILLHTELERFLEYL | HLA-DRB1*04:04            | Consensus (smm/nn/sturniolo) | 9.49 |
| KRQVILLHTELERFL | HLA-DRB1*04:01            | Consensus (smm/nn/sturniolo) | 9.59 |
| LLHTELERFLEYLPL | HLA-DQA1*03:01/DQB1*03:02 | Consensus (comb.lib./smm/nn) | 9.76 |
| VILLHTELERFLEYL | HLA-DQA1*03:01/DQB1*03:02 | Consensus (comb.lib./smm/nn) | 9.79 |
| RQVILLHTELERFLE | HLA-DRB1*04:01            | Consensus (smm/nn/sturniolo) | 9.83 |
| HTQTTLFHTFYELLI | HLA-DPA1*01:03/DPB1*04:01 | NetMHCIIpan                  | 0.05 |
| TQTTLFHTFYELLIQ | HLA-DPA1*01:03/DPB1*04:01 | NetMHCIIpan                  | 0.05 |
| QTTLFHTFYELLIQK | HLA-DPA1*01:03/DPB1*04:01 | NetMHCIIpan                  | 0.05 |
| TTLFHTFYELLIQKN | HLA-DPA1*01:03/DPB1*04:01 | NetMHCIIpan                  | 0.06 |
| SHTQTTLFHTFYELL | HLA-DPA1*01:03/DPB1*04:01 | NetMHCIIpan                  | 0.07 |
| TLFHTFYELLIQKNK | HLA-DPA1*01:03/DPB1*04:01 | NetMHCIIpan                  | 0.08 |
| LFHTFYELLIQKNKH | HLA-DPA1*01:03/DPB1*04:01 | NetMHCIIpan                  | 0.32 |
| FHTFYELLIQKNKHK | HLA-DRB1*04:01            | Consensus (smm/nn/sturniolo) | 2.89 |
| FHTFYELLIQKNKHK | HLA-DPA1*01:03/DPB1*04:01 | NetMHCIIpan                  | 2.93 |
| FHTFYELLIQKNKHK | HLA-DRB1*04:04            | Consensus (smm/nn/sturniolo) | 3.36 |
| LFHTFYELLIQKNKH | HLA-DRB1*04:01            | Consensus (smm/nn/sturniolo) | 6.09 |
| TLFHTFYELLIQKNK | HLA-DRB1*04:01            | Consensus (smm/nn/sturniolo) | 6.1  |
| TTLFHTFYELLIQKN | HLA-DRB1*04:01            | Consensus (smm/nn/sturniolo) | 7.57 |
| RLVLGKFGDLTNNFS | HLA-DRB1*04:01            | Consensus (smm/nn/sturniolo) | 1.33 |
| LVLGKFGDLTNNFSS | HLA-DRB1*04:01            | Consensus (smm/nn/sturniolo) | 1.33 |
| VLGKFGDLTNNFSSP | HLA-DRB1*04:01            | Consensus (smm/nn/sturniolo) | 1.33 |
| LGKFGDLTNNFSSPH | HLA-DRB1*04:01            | Consensus (smm/nn/sturniolo) | 1.33 |
| GKFGDLTNNFSSPHA | HLA-DRB1*04:01            | Consensus (smm/nn/sturniolo) | 1.33 |
| KFGDLTNNFSSPHAR | HLA-DRB1*04:01            | Consensus (smm/nn/sturniolo) | 1.9  |
| RLVLGKFGDLTNNFS | HLA-DRB1*04:04            | Consensus (smm/nn/sturniolo) | 2.44 |
| LVLGKFGDLTNNFSS | HLA-DRB1*04:04            | Consensus (smm/nn/sturniolo) | 2.44 |
| VLGKFGDLTNNFSSP | HLA-DRB1*04:04            | Consensus (smm/nn/sturniolo) | 2.44 |
| LGKFGDLTNNFSSPH | HLA-DRB1*04:04            | Consensus (smm/nn/sturniolo) | 2.44 |
| GKFGDLTNNFSSPHA | HLA-DRB1*04:04            | Consensus (smm/nn/sturniolo) | 2.44 |
| KFGDLTNNFSSPHAR | HLA-DRB1*04:04            | Consensus (smm/nn/sturniolo) | 3.39 |
| SPREEFLRLCKKIMM | HLA-DRB1*04:04            | Consensus (smm/nn/sturniolo) | 7.05 |
| PREEFLRLCKKIMMR | HLA-DRB1*04:04            | Consensus (smm/nn/sturniolo) | 7.05 |
| REEFLRLCKKIMMRS | HLA-DRB1*04:04            | Consensus (smm/nn/sturniolo) | 7.05 |
| EEFLRLCKKIMMRSI | HLA-DRB1*04:04            | Consensus (smm/nn/sturniolo) | 7.05 |
| EFLRLCKKIMMRSIQ | HLA-DRB1*04:04            | Consensus (smm/nn/sturniolo) | 7.05 |
| STANYNSFSSAPMPQ | HLA-DRB1*04:01            | Consensus (smm/nn/sturniolo) | 0.09 |
| TANYNSFSSAPMPQI | HLA-DRB1*04:01            | Consensus (smm/nn/sturniolo) | 0.09 |
| ANYNSFSSAPMPQIP | HLA-DRB1*04:01            | Consensus (smm/nn/sturniolo) | 0.09 |
| PSTANYNSFSSAPMP | HLA-DRB1*04:01            | Consensus (smm/nn/sturniolo) | 0.14 |
| NYNSFSSAPMPQIPV | HLA-DRB1*04:01            | Consensus (smm/nn/sturniolo) | 0.48 |
| YNSFSSAPMPQIPVA | HLA-DRB1*04:01            | Consensus (smm/nn/sturniolo) | 0.54 |
| PSTANYNSFSSAPMP | HLA-DRB1*04:04            | Consensus (smm/nn/sturniolo) | 3.08 |
| STANYNSFSSAPMPQ | HLA-DRB1*04:04            | Consensus (smm/nn/sturniolo) | 3.08 |
| TANYNSFSSAPMPQI | HLA-DRB1*04:04            | Consensus (smm/nn/sturniolo) | 3.08 |

|                        |                           |                              |      |
|------------------------|---------------------------|------------------------------|------|
| ANYNSFSSAPMPQIP        | HLA-DRB1*04:04            | Consensus (smm/nn/sturniolo) | 3.08 |
| NYNSFSSAPMPQIPV        | HLA-DRB1*04:04            | Consensus (smm/nn/sturniolo) | 3.08 |
| YNSFSSAPMPQIPVA        | HLA-DRB1*04:04            | Consensus (smm/nn/sturniolo) | 3.08 |
| SAPMPQIPVASVTPT        | HLA-DRB1*04:04            | Consensus (smm/nn/sturniolo) | 6.97 |
| FSSAPMPQIPVASVT        | HLA-DRB1*04:04            | Consensus (smm/nn/sturniolo) | 8.16 |
| SFSSAPMPQIPVASV        | HLA-DRB1*04:04            | Consensus (smm/nn/sturniolo) | 8.24 |
| SSAPMPQIPVASVTP        | HLA-DRB1*04:04            | Consensus (smm/nn/sturniolo) | 9.17 |
| CPREEFLRLCKKIMM        | HLA-DRB1*04:04            | Consensus (smm/nn/sturniolo) | 7.05 |
| PREEFLRLCKKIMMR        | HLA-DRB1*04:04            | Consensus (smm/nn/sturniolo) | 7.05 |
| REEFLRLCKKIMMRS        | HLA-DRB1*04:04            | Consensus (smm/nn/sturniolo) | 7.05 |
| EEFLRLCKKIMMRSI        | HLA-DRB1*04:04            | Consensus (smm/nn/sturniolo) | 7.05 |
| EFLRLCKKIMMRSIQ        | HLA-DRB1*04:04            | Consensus (smm/nn/sturniolo) | 7.05 |
| SGIPENSFNVSSLVE        | HLA-DQA1*03:01/DQB1*03:02 | Consensus (comb.lib./smm/nn) | 6.15 |
| VGDFSQEFSPIQEAQ        | HLA-DQA1*03:01/DQB1*03:02 | Consensus (comb.lib./smm/nn) | 2.05 |
| RVSVGDFSQEFSPIQ        | HLA-DRB1*04:01            | Consensus (smm/nn/sturniolo) | 2.16 |
| VSVGDFSQEFSPIQE        | HLA-DRB1*04:01            | Consensus (smm/nn/sturniolo) | 2.16 |
| SVGDFSQEFSPIQEA        | HLA-DRB1*04:01            | Consensus (smm/nn/sturniolo) | 2.16 |
| VGDFSQEFSPIQEAQ        | HLA-DRB1*04:01            | Consensus (smm/nn/sturniolo) | 2.16 |
| GDFSQEFSPIQEAQQ        | HLA-DRB1*04:01            | Consensus (smm/nn/sturniolo) | 2.16 |
| GDFSQEFSPIQEAQQ        | HLA-DQA1*03:01/DQB1*03:02 | Consensus (comb.lib./smm/nn) | 2.22 |
| DFSQEFSPIQEAQQD        | HLA-DQA1*03:01/DQB1*03:02 | Consensus (comb.lib./smm/nn) | 2.32 |
| VSVGDFSQEFSPIQEA       | HLA-DQA1*03:01/DQB1*03:02 | Consensus (comb.lib./smm/nn) | 2.46 |
| VSVGDFSQEFSPIQE        | HLA-DQA1*03:01/DQB1*03:02 | Consensus (comb.lib./smm/nn) | 4.57 |
| DFSQEFSPIQEAQQD        | HLA-DRB1*04:01            | Consensus (smm/nn/sturniolo) | 5.77 |
| GRTQLLWTPAAPTAM        | HLA-DRB1*07:01            | Consensus (comb.lib./smm/nn) | 2.51 |
| <b>RTQLLWTPAAPTAMA</b> | HLA-DRB1*07:01            | Consensus (comb.lib./smm/nn) | 2.91 |
| PAGRTQLLWTPAAPT        | HLA-DRB1*07:01            | Consensus (comb.lib./smm/nn) | 3.45 |
| AGRTQLLWTPAAPTA        | HLA-DRB1*07:01            | Consensus (comb.lib./smm/nn) | 3.55 |
| TQLLWTPAAPTAMAE        | HLA-DRB1*07:01            | Consensus (comb.lib./smm/nn) | 4.28 |
| QLLWTPAAPTAMAEV        | HLA-DRB1*07:01            | Consensus (comb.lib./smm/nn) | 5.21 |
| LLWTPAAPTAMAEVG        | HLA-DRB1*07:01            | Consensus (comb.lib./smm/nn) | 7.15 |
| QIKLADFRLARLYSS        | HLA-DRB1*11:04            | sturniolo                    | 1.41 |
| IKLADFRLARLYSSE        | HLA-DRB1*11:04            | sturniolo                    | 1.41 |
| KLADFRLARLYSSEE        | HLA-DRB1*11:04            | sturniolo                    | 1.41 |
| LADFRLARLYSSEES        | HLA-DRB1*11:04            | sturniolo                    | 1.41 |
| ADFRLARLYSSEESR        | HLA-DRB1*11:04            | sturniolo                    | 1.41 |
| QIKLADFRLARLYSS        | HLA-DPA1*01:03/DPB1*04:01 | NetMHCIIPan                  | 3.92 |
| RGQIKLADFRLARLY        | HLA-DPA1*01:03/DPB1*04:01 | NetMHCIIPan                  | 3.93 |
| GQIKLADFRLARLYS        | HLA-DPA1*01:03/DPB1*04:01 | NetMHCIIPan                  | 3.93 |
| IKLADFRLARLYSSE        | HLA-DPA1*01:03/DPB1*04:01 | NetMHCIIPan                  | 4.95 |
| KLADFRLARLYSSEE        | HLA-DPA1*01:03/DPB1*04:01 | NetMHCIIPan                  | 8.33 |
| QIKLADFRLARLYSS        | HLA-DRB1*07:01            | Consensus (comb.lib./smm/nn) | 9.23 |
| RGQIKLADFRLARLY        | HLA-DRB1*11:04            | sturniolo                    | 9.34 |
| GQIKLADFRLARLYS        | HLA-DRB1*11:04            | sturniolo                    | 9.34 |
| KLADFRLARLYSSEE        | HLA-DRB1*07:01            | Consensus (comb.lib./smm/nn) | 9.74 |
| IKLADFRLARLYSSE        | HLA-DRB1*07:01            | Consensus (comb.lib./smm/nn) | 9.79 |
| LADFRLARLYSSEES        | HLA-DRB1*07:01            | Consensus (comb.lib./smm/nn) | 9.84 |

|                  |                           |                               |      |
|------------------|---------------------------|-------------------------------|------|
| PSAAGPVRLKPGGLVP | HLA-DRB1*11:04            | sturniolo                     | 2.3  |
| SAAGPVRLKPGGLVPG | HLA-DRB1*11:04            | sturniolo                     | 2.3  |
| AAGPVRLKPGGLVPG  | HLA-DRB1*11:04            | sturniolo                     | 2.3  |
| AAVRPEQRPAARGSR  | HLA-DRB1*11:04            | sturniolo                     | 3.57 |
| AVRPEQRPAARGSRV  | HLA-DRB1*11:04            | sturniolo                     | 3.57 |
| TFPKKIQMLARDFLD  | HLA-DRB1*11:04            | sturniolo                     | 6.37 |
| FPKKIQMLARDFLDE  | HLA-DRB1*11:04            | sturniolo                     | 6.37 |
| PKKKIQMLARDFLDEY | HLA-DRB1*11:04            | sturniolo                     | 6.37 |
| PKKKIQMLARDFLDEY | HLA-DPA1*01:03/DPB1*04:01 | NetMHCIIpan                   | 8.92 |
| PETGEIQVKTFLDRE  | HLA-DRB1*11:04            | sturniolo                     | 9.34 |
| ETGEIQVKTFLDREQ  | HLA-DRB1*11:04            | sturniolo                     | 9.34 |
| TGEIQVKTFLDREQR  | HLA-DRB1*11:04            | sturniolo                     | 9.34 |
| GEIQVKTFLDREQRE  | HLA-DRB1*11:04            | sturniolo                     | 9.34 |
| EIQVKTFLDREQRES  | HLA-DRB1*11:04            | sturniolo                     | 9.34 |
| IQVKTFLDREQRESY  | HLA-DRB1*11:04            | sturniolo                     | 9.34 |
| ITDAHELGVAAHPPGY | HLA-DRB1*11:04            | sturniolo                     | 8.81 |
| EVVGGYTWPSTGNIYQ | HLA-DRB1*11:04            | sturniolo                     | 3.58 |
| VVGGYTWPSTGNIYQG | HLA-DRB1*11:04            | sturniolo                     | 3.58 |
| TIKNSDKNVVLEHFG  | HLA-DRB1*11:04            | sturniolo                     | 8.29 |
| RNSFALVPSLQRLML  | HLA-DRB1*07:01            | Consensus (comb.lib./simm/nn) | 1.72 |
| TRNSFALVPSLQRLM  | HLA-DRB1*07:01            | Consensus (comb.lib./simm/nn) | 2.27 |
| RNSFALVPSLQRLML  | HLA-DPA1*01:03/DPB1*04:01 | NetMHCIIpan                   | 2.38 |
| NSFALVPSLQRLMLR  | HLA-DRB1*07:01            | Consensus (comb.lib./simm/nn) | 2.44 |
| SFALVPSLQRLMLRK  | HLA-DRB1*07:01            | Consensus (comb.lib./simm/nn) | 3.1  |
| NSFALVPSLQRLMLR  | HLA-DPA1*01:03/DPB1*04:01 | NetMHCIIpan                   | 3.34 |
| FALVPSLQRLMLRKV  | HLA-DRB1*07:01            | Consensus (comb.lib./simm/nn) | 3.35 |
| SFALVPSLQRLMLRK  | HLA-DPA1*01:03/DPB1*04:01 | NetMHCIIpan                   | 3.71 |
| TRNSFALVPSLQRLM  | HLA-DPA1*01:03/DPB1*04:01 | NetMHCIIpan                   | 4.02 |
| FALVPSLQRLMLRKV  | HLA-DPA1*01:03/DPB1*04:01 | NetMHCIIpan                   | 4.95 |
| SLQRLMLRKVALKNV  | HLA-DRB1*07:01            | Consensus (comb.lib./simm/nn) | 5.34 |
| LQRLMLRKVALKNVD  | HLA-DRB1*07:01            | Consensus (comb.lib./simm/nn) | 5.34 |
| QRLMLRKVALKNVDS  | HLA-DRB1*07:01            | Consensus (comb.lib./simm/nn) | 5.34 |
| RLMLRKVALKNVDSS  | HLA-DRB1*07:01            | Consensus (comb.lib./simm/nn) | 5.34 |
| LMLRKVALKNVDSSP  | HLA-DRB1*07:01            | Consensus (comb.lib./simm/nn) | 5.34 |
| VPSLQRLMLRKVALK  | HLA-DRB1*07:01            | Consensus (comb.lib./simm/nn) | 5.36 |
| PSLQRLMLRKVALKN  | HLA-DRB1*07:01            | Consensus (comb.lib./simm/nn) | 5.76 |
| RNSFALVPSLQRLML  | HLA-DRB1*01:01            | Consensus (comb.lib./simm/nn) | 7.47 |
| TRNSFALVPSLQRLM  | HLA-DRB1*01:01            | Consensus (comb.lib./simm/nn) | 8.17 |
| NSFALVPSLQRLMLR  | HLA-DRB1*01:01            | Consensus (comb.lib./simm/nn) | 8.17 |
| YKFSKPALQSQSISL  | HLA-DRB1*07:01            | Consensus (comb.lib./simm/nn) | 2.05 |
| SSHYKFSKPALQSQS  | HLA-DRB1*07:01            | Consensus (comb.lib./simm/nn) | 3.12 |
| KFSKPALQSQSISLV  | HLA-DRB1*07:01            | Consensus (comb.lib./simm/nn) | 3.35 |
| SHYKFSKPALQSQSI  | HLA-DRB1*07:01            | Consensus (comb.lib./simm/nn) | 3.59 |
| HYKFSKPALQSQSIS  | HLA-DRB1*07:01            | Consensus (comb.lib./simm/nn) | 4.51 |
| FSKPALQSQSISLVQ  | HLA-DRB1*07:01            | Consensus (comb.lib./simm/nn) | 4.73 |
| SKPALQSQSISLVQQ  | HLA-DRB1*07:01            | Consensus (comb.lib./simm/nn) | 7    |
| SHYKFSKPALQSQSI  | HLA-DRB1*01:01            | Consensus (comb.lib./simm/nn) | 8.47 |



|                  |                           |                               |      |
|------------------|---------------------------|-------------------------------|------|
| SSHFKSPALQSQS    | HLA-DRB1*01:01            | Consensus (comb.lib./simm/nn) | 9.11 |
| HYKFSKPALQSQSIS  | HLA-DRB1*01:01            | Consensus (comb.lib./simm/nn) | 9.11 |
| ETVNHYYLLFQNTDL  | HLA-DRB1*07:01            | Consensus (comb.lib./simm/nn) | 3.35 |
| TVNHYYLLFQNTDLG  | HLA-DRB1*07:01            | Consensus (comb.lib./simm/nn) | 5.08 |
| VNHYYLLFQNTDLGS  | HLA-DRB1*07:01            | Consensus (comb.lib./simm/nn) | 6.58 |
| NHHYYLLFQNTDLGSF | HLA-DRB1*07:01            | Consensus (comb.lib./simm/nn) | 7.17 |
| ETVNHYYLLFQNTDL  | HLA-DPA1*01:03/DPB1*04:01 | NetMHCIIpan                   | 7.44 |
| NHHYYLLFQNTDLGSF | HLA-DPA1*01:03/DPB1*04:01 | NetMHCIIpan                   | 8.33 |
| TVNHYYLLFQNTDLG  | HLA-DPA1*01:03/DPB1*04:01 | NetMHCIIpan                   | 8.36 |
| VNHYYLLFQNTDLGS  | HLA-DPA1*01:03/DPB1*04:01 | NetMHCIIpan                   | 8.37 |
| TVNHYYLLFQNTDLG  | HLA-DQA1*01:01/DQB1*05:01 | Consensus (comb.lib./simm/nn) | 8.68 |
| ETVNHYYLLFQNTDL  | HLA-DQA1*01:01/DQB1*05:01 | Consensus (comb.lib./simm/nn) | 8.76 |
| LFQNTDLGSFHDLR   | HLA-DQA1*01:01/DQB1*05:01 | Consensus (comb.lib./simm/nn) | 8.85 |
| VNHYYLLFQNTDLGS  | HLA-DQA1*01:01/DQB1*05:01 | Consensus (comb.lib./simm/nn) | 8.88 |
| HYYLLFQNTDLGSFH  | HLA-DRB1*07:01            | Consensus (comb.lib./simm/nn) | 9.73 |
| HYYLLFQNTDLGSFH  | HLA-DPA1*01:03/DPB1*04:01 | NetMHCIIpan                   | 9.78 |
| DRASFLLDYALSPD   | HLA-DPA1*01:03/DPB1*04:01 | NetMHCIIpan                   | 1.57 |
| RASFLLDYALSPDG   | HLA-DPA1*01:03/DPB1*04:01 | NetMHCIIpan                   | 1.91 |
| DRASFLLDYALSPD   | HLA-DQA1*01:01/DQB1*05:01 | Consensus (comb.lib./simm/nn) | 2.24 |
| RASFLLDYALSPDG   | HLA-DQA1*01:01/DQB1*05:01 | Consensus (comb.lib./simm/nn) | 2.61 |
| ASFLLDYALSPDGS   | HLA-DPA1*01:03/DPB1*04:01 | NetMHCIIpan                   | 3.41 |
| ASFLLDYALSPDGS   | HLA-DQA1*01:01/DQB1*05:01 | Consensus (comb.lib./simm/nn) | 4.69 |
| SFLLDYALSPDGS    | HLA-DPA1*01:03/DPB1*04:01 | NetMHCIIpan                   | 4.9  |
| ERFWRNILLSLHKG   | HLA-DPA1*01:03/DPB1*04:01 | NetMHCIIpan                   | 1.77 |
| RFWRNILLSLHKG    | HLA-DPA1*01:03/DPB1*04:01 | NetMHCIIpan                   | 3.36 |
| WRNILLSLHKGSLY   | HLA-DRB1*07:01            | Consensus (comb.lib./simm/nn) | 4.19 |
| ERFWRNILLSLHKG   | HLA-DRB1*07:01            | Consensus (comb.lib./simm/nn) | 5.85 |
| RFWRNILLSLHKG    | HLA-DRB1*07:01            | Consensus (comb.lib./simm/nn) | 5.85 |
| RNILLSLHKGSLYP   | HLA-DRB1*07:01            | Consensus (comb.lib./simm/nn) | 6.12 |
| FWRNILLSLHKGSL   | HLA-DPA1*01:03/DPB1*04:01 | NetMHCIIpan                   | 8.61 |
| NILLSLHKGSLYPR   | HLA-DRB1*07:01            | Consensus (comb.lib./simm/nn) | 9    |
| AGAVRTLLSQVNKVW  | HLA-DRB1*01:01            | Consensus (comb.lib./simm/nn) | 10   |
| SLLRAAFFGKCFDR   | HLA-DPA1*01:03/DPB1*04:01 | NetMHCIIpan                   | 0.79 |
| KLLRAAFFGKCFD    | HLA-DPA1*01:03/DPB1*04:01 | NetMHCIIpan                   | 1.82 |
| QKLLRAAFFGKCF    | HLA-DPA1*01:03/DPB1*04:01 | NetMHCIIpan                   | 2.1  |
| MQKLLRAAFFGKCF   | HLA-DPA1*01:03/DPB1*04:01 | NetMHCIIpan                   | 4.4  |
| DMQKLLRAAFFGK    | HLA-DPA1*01:03/DPB1*04:01 | NetMHCIIpan                   | 6.49 |
| PDMQKLLRAAFFGK   | HLA-DPA1*01:03/DPB1*04:01 | NetMHCIIpan                   | 9.43 |
| GRELRFNLIANQHLL  | HLA-DRB1*07:01            | Consensus (comb.lib./simm/nn) | 0.06 |
| RELRFNLIANQHLLA  | HLA-DRB1*07:01            | Consensus (comb.lib./simm/nn) | 0.06 |
| ELRFNLIANQHLLAP  | HLA-DRB1*07:01            | Consensus (comb.lib./simm/nn) | 0.08 |
| LRFNLIANQHLLAPG  | HLA-DRB1*07:01            | Consensus (comb.lib./simm/nn) | 0.11 |
| RGRELRFNLIANQHL  | HLA-DRB1*07:01            | Consensus (comb.lib./simm/nn) | 0.13 |
| RFNLIANQHLLAPGF  | HLA-DRB1*07:01            | Consensus (comb.lib./simm/nn) | 0.21 |
| FNLIANQHLLAPGFV  | HLA-DRB1*07:01            | Consensus (comb.lib./simm/nn) | 0.43 |
| RELRFNLIANQHLLA  | HLA-DRB1*01:01            | Consensus (comb.lib./simm/nn) | 0.96 |
| ELRFNLIANQHLLAP  | HLA-DRB1*01:01            | Consensus (comb.lib./simm/nn) | 1.15 |

|                  |                           |                              |      |
|------------------|---------------------------|------------------------------|------|
| GRELRFNLIANQHLL  | HLA-DRB1*01:01            | Consensus (comb.lib./smm/nn) | 1.24 |
| LRFNLIANQHLLAPG  | HLA-DRB1*01:01            | Consensus (comb.lib./smm/nn) | 1.62 |
| RGRELRFNLIANQHLL | HLA-DRB1*01:01            | Consensus (comb.lib./smm/nn) | 2.28 |
| RFNLIANQHLLAPGF  | HLA-DRB1*01:01            | Consensus (comb.lib./smm/nn) | 4.57 |
| FNLIANQHLLAPGFV  | HLA-DRB1*01:01            | Consensus (comb.lib./smm/nn) | 4.95 |
| RELRFNLIANQHLLA  | HLA-DPA1*01:03/DPB1*04:01 | NetMHCIIPan                  | 6.29 |
| ELRFNLIANQHLLAP  | HLA-DPA1*01:03/DPB1*04:01 | NetMHCIIPan                  | 7.44 |
| GRELRFNLIANQHLL  | HLA-DPA1*01:03/DPB1*04:01 | NetMHCIIPan                  | 8.07 |
| LRFNLIANQHLLAPG  | HLA-DPA1*01:03/DPB1*04:01 | NetMHCIIPan                  | 9.47 |
| DANLRKLNFRFLFVIR | HLA-DPA1*01:03/DPB1*04:01 | NetMHCIIPan                  | 2.99 |
| LDANLRKLNFRFLFVI | HLA-DPA1*01:03/DPB1*04:01 | NetMHCIIPan                  | 3.34 |
| ANLRKLNFRFLFVIRG | HLA-DPA1*01:03/DPB1*04:01 | NetMHCIIPan                  | 3.41 |
| NLRKLNFRFLFVIRGQ | HLA-DPA1*01:03/DPB1*04:01 | NetMHCIIPan                  | 4.13 |
| DLNLRKLNFRFLFV   | HLA-DPA1*01:03/DPB1*04:01 | NetMHCIIPan                  | 4.97 |
| LRKLNFRFLFVIRGQP | HLA-DPA1*01:03/DPB1*04:01 | NetMHCIIPan                  | 5.37 |
| RKLNFRFLFVIRGQPA | HLA-DRB1*07:01            | Consensus (comb.lib./smm/nn) | 6.99 |
| KLNFRFLFVIRGQPAD | HLA-DRB1*07:01            | Consensus (comb.lib./smm/nn) | 6.99 |
| RKLNFRFLFVIRGQPA | HLA-DPA1*01:03/DPB1*04:01 | NetMHCIIPan                  | 8.76 |
| EDLDANLRKLNFRFLF | HLA-DPA1*01:03/DPB1*04:01 | NetMHCIIPan                  | 9.38 |
| GKIHLFEAEFTQVAK  | HLA-DPA1*01:03/DPB1*02:01 | Consensus (comb.lib./smm/nn) | 0.09 |
| KIHLFEAEFTQVAKK  | HLA-DPA1*01:03/DPB1*02:01 | Consensus (comb.lib./smm/nn) | 0.09 |
| LPGKIHLFEAEFTQV  | HLA-DPA1*01:03/DPB1*02:01 | Consensus (comb.lib./smm/nn) | 0.1  |
| PGKIHLFEAEFTQVA  | HLA-DPA1*01:03/DPB1*02:01 | Consensus (comb.lib./smm/nn) | 0.1  |
| IHLFEAEFTQVAKKE  | HLA-DPA1*01:03/DPB1*02:01 | Consensus (comb.lib./smm/nn) | 0.11 |
| HLFEAEFTQVAKKEP  | HLA-DPA1*01:03/DPB1*02:01 | Consensus (comb.lib./smm/nn) | 0.63 |
| KIHLFEAEFTQVAKK  | HLA-DPA1*01:03/DPB1*04:02 | NetMHCIIPan                  | 4.16 |
| GKIHLFEAEFTQVAK  | HLA-DPA1*01:03/DPB1*04:02 | NetMHCIIPan                  | 4.37 |
| PGKIHLFEAEFTQVA  | HLA-DPA1*01:03/DPB1*04:02 | NetMHCIIPan                  | 5.22 |
| KLPGKIHLFEAEFTQ  | HLA-DPA1*01:03/DPB1*02:01 | Consensus (comb.lib./smm/nn) | 5.73 |
| IHLFEAEFTQVAKKE  | HLA-DPA1*01:03/DPB1*04:02 | NetMHCIIPan                  | 7.11 |
| LPGKIHLFEAEFTQV  | HLA-DPA1*01:03/DPB1*04:02 | NetMHCIIPan                  | 7.16 |
| QKLPGKIHLFEAEFT  | HLA-DPA1*01:03/DPB1*02:01 | Consensus (comb.lib./smm/nn) | 7.9  |
| YMASEVVEVFTDQAT  | HLA-DQA1*01:01/DQB1*05:01 | Consensus (comb.lib./smm/nn) | 7.01 |
| QLEYKYQYAYFRMGI  | HLA-DPA1*01:03/DPB1*04:02 | NetMHCIIPan                  | 0.06 |
| LEYKYQYAYFRMGIK  | HLA-DPA1*01:03/DPB1*04:02 | NetMHCIIPan                  | 0.06 |
| EYKYQYAYFRMGIKH  | HLA-DPA1*01:03/DPB1*04:02 | NetMHCIIPan                  | 0.06 |
| YKYQYAYFRMGIKHP  | HLA-DPA1*01:03/DPB1*04:02 | NetMHCIIPan                  | 0.1  |
| GQLEYKYQYAYFRMG  | HLA-DPA1*01:03/DPB1*04:02 | NetMHCIIPan                  | 0.12 |
| QLEYKYQYAYFRMGI  | HLA-DPA1*01:03/DPB1*02:01 | Consensus (comb.lib./smm/nn) | 0.16 |
| LEYKYQYAYFRMGIK  | HLA-DPA1*01:03/DPB1*02:01 | Consensus (comb.lib./smm/nn) | 0.16 |
| EYKYQYAYFRMGIKH  | HLA-DPA1*01:03/DPB1*02:01 | Consensus (comb.lib./smm/nn) | 0.19 |
| GQLEYKYQYAYFRMG  | HLA-DPA1*01:03/DPB1*02:01 | Consensus (comb.lib./smm/nn) | 0.25 |
| YKYQYAYFRMGIKHP  | HLA-DPA1*01:03/DPB1*02:01 | Consensus (comb.lib./smm/nn) | 0.32 |
| LGQLEYKYQYAYFRM  | HLA-DPA1*01:03/DPB1*04:02 | NetMHCIIPan                  | 0.63 |
| KYQYAYFRMGIKHPD  | HLA-DPA1*01:03/DPB1*04:02 | NetMHCIIPan                  | 0.76 |
| KYQYAYFRMGIKHPD  | HLA-DPA1*01:03/DPB1*02:01 | Consensus (comb.lib./smm/nn) | 1.16 |
| LGQLEYKYQYAYFRM  | HLA-DPA1*01:03/DPB1*02:01 | Consensus (comb.lib./smm/nn) | 2.93 |

|                  |                           |                              |      |
|------------------|---------------------------|------------------------------|------|
| DLGQLEYKYQYAYFR  | HLA-DPA1*01:03/DPB1*04:02 | NetMHCIIPan                  | 3.58 |
| ENDDLFMMPRIVDVT  | HLA-DPA1*01:03/DPB1*02:01 | Consensus (comb.lib./smm/nn) | 6.29 |
| NDDLFMMPRIVDVTS  | HLA-DPA1*01:03/DPB1*02:01 | Consensus (comb.lib./smm/nn) | 6.29 |
| DDLFMMPRIVDVTSLS | HLA-DPA1*01:03/DPB1*02:01 | Consensus (comb.lib./smm/nn) | 6.46 |
| PENDDLFMMPRIVDV  | HLA-DPA1*01:03/DPB1*02:01 | Consensus (comb.lib./smm/nn) | 6.64 |
| DLFMMPRIVDVTSLSA | HLA-DPA1*01:03/DPB1*02:01 | Consensus (comb.lib./smm/nn) | 7.24 |
| DDLFMMPRIVDVTSLS | HLA-DQA1*01:01/DQB1*05:01 | Consensus (comb.lib./smm/nn) | 7.57 |
| NDDLFMMPRIVDVTS  | HLA-DQA1*01:01/DQB1*05:01 | Consensus (comb.lib./smm/nn) | 7.62 |
| ENDDLFMMPRIVDVT  | HLA-DQA1*01:01/DQB1*05:01 | Consensus (comb.lib./smm/nn) | 7.9  |
| LFMMPRIVDVTSLAT  | HLA-DPA1*01:03/DPB1*02:01 | Consensus (comb.lib./smm/nn) | 9.04 |
| LDDIKEWLEDEGQVL  | HLA-DQA1*01:01/DQB1*05:01 | Consensus (comb.lib./smm/nn) | 4.41 |
| TLDDIKEWLEDEGQV  | HLA-DQA1*01:01/DQB1*05:01 | Consensus (comb.lib./smm/nn) | 4.49 |
| DDIKEWLEDEGQVLN  | HLA-DQA1*01:01/DQB1*05:01 | Consensus (comb.lib./smm/nn) | 5.41 |
| DIKEWLEDEGQVLNI  | HLA-DQA1*01:01/DQB1*05:01 | Consensus (comb.lib./smm/nn) | 6.23 |
| IKEWLEDEGQVLNIQ  | HLA-DQA1*01:01/DQB1*05:01 | Consensus (comb.lib./smm/nn) | 8.86 |
| PSQFARVPGYVGSPL  | HLA-DRB1*01:01            | Consensus (comb.lib./smm/nn) | 4.47 |
| SQFARVPGYVGSPLA  | HLA-DRB1*01:01            | Consensus (comb.lib./smm/nn) | 6.17 |
| MSPSQFARVPGYVGS  | HLA-DRB1*01:01            | Consensus (comb.lib./smm/nn) | 7.99 |
| SPSQFARVPGYVGS   | HLA-DRB1*01:01            | Consensus (comb.lib./smm/nn) | 8.96 |
| VVEIIRYHPFLYDR   | HLA-DPA1*01:03/DPB1*02:01 | Consensus (comb.lib./smm/nn) | 1.24 |
| VVEIIRYHPFLYDRE  | HLA-DPA1*01:03/DPB1*02:01 | Consensus (comb.lib./smm/nn) | 1.24 |
| GVVEIIRYHPFLYD   | HLA-DPA1*01:03/DPB1*02:01 | Consensus (comb.lib./smm/nn) | 1.64 |
| EVIIRYHPFLYDRET  | HLA-DPA1*01:03/DPB1*02:01 | Consensus (comb.lib./smm/nn) | 1.66 |
| VVEIIRYHPFLYDRE  | HLA-DPA1*01:03/DPB1*04:02 | NetMHCIIPan                  | 3.26 |
| VVEIIRYHPFLYDR   | HLA-DPA1*01:03/DPB1*04:02 | NetMHCIIPan                  | 3.48 |
| EVIIRYHPFLYDRET  | HLA-DPA1*01:03/DPB1*04:02 | NetMHCIIPan                  | 3.56 |
| GVVEIIRYHPFLYD   | HLA-DPA1*01:03/DPB1*04:02 | NetMHCIIPan                  | 4.64 |
| DGVVEIIRYHPFLY   | HLA-DPA1*01:03/DPB1*02:01 | Consensus (comb.lib./smm/nn) | 6.84 |
| DGVVEIIRYHPFLY   | HLA-DPA1*01:03/DPB1*04:02 | NetMHCIIPan                  | 8.41 |
| DGVSEEFWLVDLLPS  | HLA-DPA1*01:03/DPB1*02:01 | Consensus (comb.lib./smm/nn) | 0.36 |
| GVSEEFWLVDLLPST  | HLA-DPA1*01:03/DPB1*02:01 | Consensus (comb.lib./smm/nn) | 0.41 |
| VSEEFWLVDLLPSTH  | HLA-DQA1*01:01/DQB1*05:01 | Consensus (comb.lib./smm/nn) | 0.69 |
| GVSEEFWLVDLLPST  | HLA-DQA1*01:01/DQB1*05:01 | Consensus (comb.lib./smm/nn) | 0.71 |
| DGVSEEFWLVDLLPS  | HLA-DQA1*01:01/DQB1*05:01 | Consensus (comb.lib./smm/nn) | 0.74 |
| SEEFWLVDLLPSTHY  | HLA-DQA1*01:01/DQB1*05:01 | Consensus (comb.lib./smm/nn) | 0.92 |
| EEFWLVDLLPSTHYT  | HLA-DQA1*01:01/DQB1*05:01 | Consensus (comb.lib./smm/nn) | 1.5  |
| VSEEFWLVDLLPSTH  | HLA-DPA1*01:03/DPB1*02:01 | Consensus (comb.lib./smm/nn) | 2.04 |
| SEEFWLVDLLPSTHY  | HLA-DPA1*01:03/DPB1*02:01 | Consensus (comb.lib./smm/nn) | 2.9  |
| EEFWLVDLLPSTHYT  | HLA-DPA1*01:03/DPB1*02:01 | Consensus (comb.lib./smm/nn) | 3.74 |
| VSEEFWLVDLLPSTH  | HLA-DPA1*01:03/DPB1*04:02 | NetMHCIIPan                  | 4    |
| SEEFWLVDLLPSTHY  | HLA-DPA1*01:03/DPB1*04:02 | NetMHCIIPan                  | 4.19 |
| GVSEEFWLVDLLPST  | HLA-DPA1*01:03/DPB1*04:02 | NetMHCIIPan                  | 4.38 |
| DGVSEEFWLVDLLPS  | HLA-DPA1*01:03/DPB1*04:02 | NetMHCIIPan                  | 5.18 |
| EEFWLVDLLPSTHYT  | HLA-DPA1*01:03/DPB1*04:02 | NetMHCIIPan                  | 5.45 |
| DSYHLYAYHEELSAT  | HLA-DQA1*01:01/DQB1*05:01 | Consensus (comb.lib./smm/nn) | 1.83 |
| SYHLYAYHEELSATV  | HLA-DQA1*01:01/DQB1*05:01 | Consensus (comb.lib./smm/nn) | 2.04 |
| YHLYAYHEELSATVP  | HLA-DQA1*01:01/DQB1*05:01 | Consensus (comb.lib./smm/nn) | 2.71 |

|                  |                           |                              |      |
|------------------|---------------------------|------------------------------|------|
| HLAYHEELSATVPS   | HLA-DQA1*01:01/DQB1*05:01 | Consensus (comb.lib./smm/nn) | 4.98 |
| LYAYHEELSATVPSQ  | HLA-DQA1*01:01/DQB1*05:01 | Consensus (comb.lib./smm/nn) | 7.95 |
| SYHLYAYHEELSATV  | HLA-DPA1*01:03/DPB1*04:02 | NetMHCIIpan                  | 8.92 |
| DSYHLYAYHEELSAT  | HLA-DPA1*01:03/DPB1*04:02 | NetMHCIIpan                  | 9.43 |
| QYKATDFVADWAGTF  | HLA-DQA1*01:01/DQB1*05:01 | Consensus (comb.lib./smm/nn) | 2.41 |
| DQYKATDFVADWAGT  | HLA-DQA1*01:01/DQB1*05:01 | Consensus (comb.lib./smm/nn) | 2.71 |
| YKATDFVADWAGTFK  | HLA-DQA1*01:01/DQB1*05:01 | Consensus (comb.lib./smm/nn) | 2.9  |
| GDQYKATDFVADWAG  | HLA-DQA1*01:01/DQB1*05:01 | Consensus (comb.lib./smm/nn) | 3.19 |
| KATDFVADWAGTFKM  | HLA-DQA1*01:01/DQB1*05:01 | Consensus (comb.lib./smm/nn) | 4.14 |
| ATDFVADWAGTFKMOV | HLA-DQA1*01:01/DQB1*05:01 | Consensus (comb.lib./smm/nn) | 6.02 |
| TDFVADWAGTFKMOV  | HLA-DPA1*01:03/DPB1*02:01 | Consensus (comb.lib./smm/nn) | 9.04 |
| DFVADWAGTFKMOVFT | HLA-DPA1*01:03/DPB1*02:01 | Consensus (comb.lib./smm/nn) | 9.52 |
| GDQYKATDFVADWAG  | HLA-DPA1*01:03/DPB1*02:01 | Consensus (comb.lib./smm/nn) | 9.84 |
| EYWKVLDGELEVAPE  | HLA-DQA1*01:01/DQB1*05:01 | Consensus (comb.lib./smm/nn) | 3.47 |
| YWKVLDGELEVAPEY  | HLA-DQA1*01:01/DQB1*05:01 | Consensus (comb.lib./smm/nn) | 3.47 |
| WKVLDGELEVAPEYP  | HLA-DQA1*01:01/DQB1*05:01 | Consensus (comb.lib./smm/nn) | 3.47 |
| KEELVLSEEDFQGIT  | HLA-DPA1*01:03/DPB1*02:01 | Consensus (comb.lib./smm/nn) | 4.62 |
| KKEELVLSEEDFQGI  | HLA-DPA1*01:03/DPB1*02:01 | Consensus (comb.lib./smm/nn) | 4.99 |
| EELVLSEEDFQGITP  | HLA-DPA1*01:03/DPB1*02:01 | Consensus (comb.lib./smm/nn) | 5.04 |
| VKKEELVLSEEDFQG  | HLA-DQA1*01:01/DQB1*05:01 | Consensus (comb.lib./smm/nn) | 5.68 |
| KKEELVLSEEDFQGI  | HLA-DQA1*01:01/DQB1*05:01 | Consensus (comb.lib./smm/nn) | 5.68 |
| KEELVLSEEDFQGIT  | HLA-DQA1*01:01/DQB1*05:01 | Consensus (comb.lib./smm/nn) | 5.68 |
| EELVLSEEDFQGITP  | HLA-DQA1*01:01/DQB1*05:01 | Consensus (comb.lib./smm/nn) | 5.68 |
| ELVLSEEDFQGITPG  | HLA-DPA1*01:03/DPB1*02:01 | Consensus (comb.lib./smm/nn) | 5.96 |
| ELVLSEEDFQGITPG  | HLA-DQA1*01:01/DQB1*05:01 | Consensus (comb.lib./smm/nn) | 6.09 |
| SVKKEELVLSEEDFQ  | HLA-DQA1*01:01/DQB1*05:01 | Consensus (comb.lib./smm/nn) | 6.88 |
| LVLSEEDFQGITPGA  | HLA-DPA1*01:03/DPB1*02:01 | Consensus (comb.lib./smm/nn) | 8.5  |
| LVLSEEDFQGITPGA  | HLA-DQA1*01:01/DQB1*05:01 | Consensus (comb.lib./smm/nn) | 9.36 |
| GGAVAFFPGNLSTSS  | HLA-DRB1*01:01            | Consensus (comb.lib./smm/nn) | 8.66 |
| DNTIFRRICTIAKHL  | HLA-DRB1*11:01            | Consensus (smm/nn/sturniolo) | 0.04 |
| NTIFRRICTIAKHLE  | HLA-DRB1*11:01            | Consensus (smm/nn/sturniolo) | 0.04 |
| LSDNTIFRRICTIAK  | HLA-DRB1*11:01            | Consensus (smm/nn/sturniolo) | 0.05 |
| SDNTIFRRICTIAKH  | HLA-DRB1*11:01            | Consensus (smm/nn/sturniolo) | 0.05 |
| RYSHPLFLPGHRLDP  | HLA-DRB1*11:01            | Consensus (smm/nn/sturniolo) | 5.07 |
| YSHPLFLPGHRLDPP  | HLA-DRB1*11:01            | Consensus (smm/nn/sturniolo) | 5.07 |
| SHPLFLPGHRLDPPI  | HLA-DRB1*11:01            | Consensus (smm/nn/sturniolo) | 5.07 |
| SHHHSYQRYSHPLF   | HLA-DRB1*11:01            | Consensus (smm/nn/sturniolo) | 8.54 |
| HHTHSYQRYSHPLFL  | HLA-DRB1*11:01            | Consensus (smm/nn/sturniolo) | 8.54 |
| HHSYQRYSHPLFLP   | HLA-DRB1*11:01            | Consensus (smm/nn/sturniolo) | 8.54 |
| THSYQRYSHPLFLPG  | HLA-DRB1*11:01            | Consensus (smm/nn/sturniolo) | 8.54 |
| HSYQRYSHPLFLPGH  | HLA-DRB1*11:01            | Consensus (smm/nn/sturniolo) | 8.54 |
| SYQRYSHPLFLPGHR  | HLA-DRB1*11:01            | Consensus (smm/nn/sturniolo) | 8.54 |
| YQRYSHPLFLPGHRL  | HLA-DRB1*11:01            | Consensus (smm/nn/sturniolo) | 8.54 |
| VTGPHLYSIYLGST   | HLA-DRB1*11:01            | Consensus (smm/nn/sturniolo) | 2.41 |
| TGPHLYSIYLGSTD   | HLA-DRB1*11:01            | Consensus (smm/nn/sturniolo) | 2.41 |
| GPHLYSIYLGSTDK   | HLA-DRB1*11:01            | Consensus (smm/nn/sturniolo) | 2.41 |
| PHLYSIYLGSTDKL   | HLA-DRB1*11:01            | Consensus (smm/nn/sturniolo) | 2.41 |

|                 |                |                              |      |
|-----------------|----------------|------------------------------|------|
| HLYSIYLGSTDKLP  | HLA-DRB1*11:01 | Consensus (smm/nn/sturniolo) | 2.41 |
| DVTGPHLYSIYLGHS | HLA-DRB1*11:01 | Consensus (smm/nn/sturniolo) | 3.08 |
| LYSIYLGSTDKLPY  | HLA-DRB1*11:01 | Consensus (smm/nn/sturniolo) | 3.79 |
| PVIFKSIMRQLISP  | HLA-DRB1*11:01 | Consensus (smm/nn/sturniolo) | 0.31 |
| YPVIFKSIMRQLIS  | HLA-DRB1*11:01 | Consensus (smm/nn/sturniolo) | 0.48 |
| VIFKSIMRQLISPQ  | HLA-DRB1*11:01 | Consensus (smm/nn/sturniolo) | 0.52 |
| SKEYPVIFKSIMRQR | HLA-DRB1*11:01 | Consensus (smm/nn/sturniolo) | 0.7  |
| KEYPVIFKSIMRQRL | HLA-DRB1*11:01 | Consensus (smm/nn/sturniolo) | 0.7  |
| EYPVIFKSIMRQRLI | HLA-DRB1*11:01 | Consensus (smm/nn/sturniolo) | 0.7  |
| IFKSIMRQRLISPQL | HLA-DRB1*11:01 | Consensus (smm/nn/sturniolo) | 0.76 |
| QSKEYPVIFKSIMRQ | HLA-DRB1*11:01 | Consensus (smm/nn/sturniolo) | 1.28 |
| RLQSKEYPVIFKSIM | HLA-DRB1*11:01 | Consensus (smm/nn/sturniolo) | 6.23 |
| LQSKEYPVIFKSIMR | HLA-DRB1*11:01 | Consensus (smm/nn/sturniolo) | 6.23 |
| HYDYVSALHPVSTPS | HLA-DRB1*11:01 | Consensus (smm/nn/sturniolo) | 0.09 |
| THYDYVSALHPVSTP | HLA-DRB1*11:01 | Consensus (smm/nn/sturniolo) | 0.16 |
| YDYVSALHPVSTPSK | HLA-DRB1*11:01 | Consensus (smm/nn/sturniolo) | 0.22 |
| HTHYDYVSALHPVST | HLA-DRB1*11:01 | Consensus (smm/nn/sturniolo) | 0.32 |
| DYVSALHPVSTPSKE | HLA-DRB1*11:01 | Consensus (smm/nn/sturniolo) | 0.52 |
| LHTHYDYVSALHPVS | HLA-DRB1*11:01 | Consensus (smm/nn/sturniolo) | 0.78 |
| YVSALHPVSTPSKEY | HLA-DRB1*11:01 | Consensus (smm/nn/sturniolo) | 0.78 |
| VSALHPVSTPSKEYT | HLA-DRB1*11:01 | Consensus (smm/nn/sturniolo) | 5.41 |
| SALHPVSTPSKEYTS | HLA-DRB1*11:01 | Consensus (smm/nn/sturniolo) | 6.08 |
| HTHYDYVSALHPVST | HLA-DRB1*01:01 | Consensus (comb.lib./smm/nn) | 7.48 |
| THYDYVSALHPVSTP | HLA-DRB1*01:01 | Consensus (comb.lib./smm/nn) | 9.01 |
| SDAFSGLTALPQSIL | HLA-DRB1*11:01 | Consensus (smm/nn/sturniolo) | 0.62 |
| DAFSGLTALPQSILL | HLA-DRB1*11:01 | Consensus (smm/nn/sturniolo) | 0.62 |
| AFSGLTALPQSILLF | HLA-DRB1*11:01 | Consensus (smm/nn/sturniolo) | 0.75 |
| FSGLTALPQSILLFG | HLA-DRB1*11:01 | Consensus (smm/nn/sturniolo) | 0.75 |
| SDAFSGLTALPQSIL | HLA-DRB1*01:01 | Consensus (comb.lib./smm/nn) | 3.72 |
| DAFSGLTALPQSILL | HLA-DRB1*01:01 | Consensus (comb.lib./smm/nn) | 3.72 |
| AFSGLTALPQSILLF | HLA-DRB1*01:01 | Consensus (comb.lib./smm/nn) | 6.65 |
| FSGLTALPQSILLFG | HLA-DRB1*01:01 | Consensus (comb.lib./smm/nn) | 6.65 |
| HQIHSYQLYTHPLLH | HLA-DRB1*01:01 | Consensus (comb.lib./smm/nn) | 5.73 |
| QIHSYQLYTHPLLHP | HLA-DRB1*01:01 | Consensus (comb.lib./smm/nn) | 6.32 |
| SHQIHSYQLYTHPLL | HLA-DRB1*11:01 | Consensus (smm/nn/sturniolo) | 7.06 |
| HQIHSYQLYTHPLLH | HLA-DRB1*11:01 | Consensus (smm/nn/sturniolo) | 7.06 |
| QIHSYQLYTHPLLHP | HLA-DRB1*11:01 | Consensus (smm/nn/sturniolo) | 7.06 |
| IHSYQLYTHPLLHPW | HLA-DRB1*11:01 | Consensus (smm/nn/sturniolo) | 7.06 |
| HSYQLYTHPLLHPWD | HLA-DRB1*11:01 | Consensus (smm/nn/sturniolo) | 7.06 |
| SYQLYTHPLLHPWDH | HLA-DRB1*11:01 | Consensus (smm/nn/sturniolo) | 7.06 |
| YQLYTHPLLHPWDHR | HLA-DRB1*11:01 | Consensus (smm/nn/sturniolo) | 7.06 |
| IHSYQLYTHPLLHPW | HLA-DRB1*01:01 | Consensus (comb.lib./smm/nn) | 7.47 |
| SHQIHSYQLYTHPLL | HLA-DRB1*01:01 | Consensus (comb.lib./smm/nn) | 7.86 |
| STQHADLTIIDNIKE | HLA-DRB1*11:01 | Consensus (smm/nn/sturniolo) | 9.09 |
| TQHADLTIIDNIKEM | HLA-DRB1*11:01 | Consensus (smm/nn/sturniolo) | 9.09 |
| QHADLTIIDNIKEMN | HLA-DRB1*11:01 | Consensus (smm/nn/sturniolo) | 9.09 |
| HADLTIIDNIKEMNF | HLA-DRB1*11:01 | Consensus (smm/nn/sturniolo) | 9.09 |

|                 |                           |                              |      |
|-----------------|---------------------------|------------------------------|------|
| ADLTIIDNIKEMNFL | HLA-DRB1*11:01            | Consensus (smm/nn/sturniolo) | 9.09 |
| DLTIIDNIKEMNFLR | HLA-DRB1*11:01            | Consensus (smm/nn/sturniolo) | 9.09 |
| LTIIDNIKEMNFLRR | HLA-DRB1*11:01            | Consensus (smm/nn/sturniolo) | 9.09 |
| SLFSPGAANLFSTYL | HLA-DRB1*01:01            | Consensus (comb.lib./smm/nn) | 5.03 |
| LFSPGAANLFSTYLA | HLA-DRB1*01:01            | Consensus (comb.lib./smm/nn) | 8.78 |
| PSQRTSWEFLQSLVS | HLA-DRB1*11:01            | Consensus (smm/nn/sturniolo) | 0.14 |
| SQRTSWEFLQSLVSI | HLA-DRB1*11:01            | Consensus (smm/nn/sturniolo) | 0.14 |
| QRTSWEFLQSLVSIK | HLA-DRB1*11:01            | Consensus (smm/nn/sturniolo) | 0.14 |
| RTSWEFLQSLVSIKQ | HLA-DRB1*11:01            | Consensus (smm/nn/sturniolo) | 0.14 |
| TSWEFLQSLVSIKQE | HLA-DRB1*11:01            | Consensus (smm/nn/sturniolo) | 0.14 |
| SWEFLQSLVSIKQEK | HLA-DRB1*11:01            | Consensus (smm/nn/sturniolo) | 0.14 |
| RTSWEFLQSLVSIKQ | HLA-DRB1*01:01            | Consensus (comb.lib./smm/nn) | 5.4  |
| TSWEFLQSLVSIKQE | HLA-DRB1*01:01            | Consensus (comb.lib./smm/nn) | 5.59 |
| QRTSWEFLQSLVSIK | HLA-DRB1*01:01            | Consensus (comb.lib./smm/nn) | 5.79 |
| SQRTSWEFLQSLVSI | HLA-DQA1*01:01/DQB1*05:01 | Consensus (comb.lib./smm/nn) | 5.92 |
| QRTSWEFLQSLVSIK | HLA-DQA1*01:01/DQB1*05:01 | Consensus (comb.lib./smm/nn) | 6.1  |
| AAFPSQRTSWEFLQS | HLA-DQA1*01:01/DQB1*05:01 | Consensus (comb.lib./smm/nn) | 6.58 |
| AFPSQRTSWEFLQSL | HLA-DQA1*01:01/DQB1*05:01 | Consensus (comb.lib./smm/nn) | 6.58 |
| FPSQRTSWEFLQSLV | HLA-DQA1*01:01/DQB1*05:01 | Consensus (comb.lib./smm/nn) | 6.58 |
| PSQRTSWEFLQSLVS | HLA-DQA1*01:01/DQB1*05:01 | Consensus (comb.lib./smm/nn) | 6.58 |
| RTSWEFLQSLVSIKQ | HLA-DQA1*01:01/DQB1*05:01 | Consensus (comb.lib./smm/nn) | 6.58 |
| SQRTSWEFLQSLVSI | HLA-DRB1*01:01            | Consensus (comb.lib./smm/nn) | 8.87 |
| PSQRTSWEFLQSLVS | HLA-DRB1*01:01            | Consensus (comb.lib./smm/nn) | 9.63 |
| SWEFLQSLVSIKQEK | HLA-DRB1*01:01            | Consensus (comb.lib./smm/nn) | 9.63 |
| FTTVSELMKVSAMSS | HLA-DRB1*11:01            | Consensus (smm/nn/sturniolo) | 1.08 |
| TTVSELMKVSAMSSP | HLA-DRB1*11:01            | Consensus (smm/nn/sturniolo) | 1.08 |
| TVSELMKVSAMSSPK | HLA-DRB1*11:01            | Consensus (smm/nn/sturniolo) | 1.08 |
| VSELMKVSAMSSPKV | HLA-DRB1*11:01            | Consensus (smm/nn/sturniolo) | 1.08 |
| VSELMKVSAMSSPKV | HLA-DRB1*01:01            | Consensus (comb.lib./smm/nn) | 3.8  |
| GSVLQFMPFTTVSEL | HLA-DRB1*11:01            | Consensus (smm/nn/sturniolo) | 7.1  |
| SVLQFMPFTTVSELM | HLA-DRB1*11:01            | Consensus (smm/nn/sturniolo) | 7.1  |
| VLQFMPFTTVSELMK | HLA-DRB1*11:01            | Consensus (smm/nn/sturniolo) | 7.1  |
| LQFMPFTTVSELMKV | HLA-DRB1*11:01            | Consensus (smm/nn/sturniolo) | 7.1  |
| QFMPFTTVSELMKVS | HLA-DRB1*11:01            | Consensus (smm/nn/sturniolo) | 7.1  |
| FMPFTTVSELMKVSA | HLA-DRB1*11:01            | Consensus (smm/nn/sturniolo) | 7.1  |
| TVSELMKVSAMSSPK | HLA-DRB1*01:01            | Consensus (comb.lib./smm/nn) | 7.41 |
| MPFTTVSELMKVSAM | HLA-DRB1*11:01            | Consensus (smm/nn/sturniolo) | 7.59 |
| PFTTVSELMKVSAMS | HLA-DRB1*11:01            | Consensus (smm/nn/sturniolo) | 7.59 |
| FTTVSELMKVSAMSS | HLA-DRB1*01:01            | Consensus (comb.lib./smm/nn) | 9.68 |
| DKGHQFHVHPLLHSG | HLA-DRB1*11:01            | Consensus (smm/nn/sturniolo) | 0.67 |
| KGHQFHVHPLLHSGD | HLA-DRB1*11:01            | Consensus (smm/nn/sturniolo) | 0.69 |
| GHQFHVHPLLHSGDD | HLA-DRB1*11:01            | Consensus (smm/nn/sturniolo) | 0.71 |
| HQFHVHPLLHSGDDL | HLA-DRB1*11:01            | Consensus (smm/nn/sturniolo) | 0.88 |
| QFHVHPLLHSGDDLD | HLA-DRB1*11:01            | Consensus (smm/nn/sturniolo) | 3.54 |
| FHVHPLLHSGDDLDP | HLA-DRB1*11:01            | Consensus (smm/nn/sturniolo) | 4.09 |
| IRGFSTIKIFQKGES | HLA-DRB1*11:01            | Consensus (smm/nn/sturniolo) | 0.34 |
| RGFSTIKIFQKGESP | HLA-DRB1*11:01            | Consensus (smm/nn/sturniolo) | 0.34 |

|                  |                           |                              |      |
|------------------|---------------------------|------------------------------|------|
| GFSTIKIFQKGESPV  | HLA-DRB1*11:01            | Consensus (smm/nn/sturniolo) | 0.49 |
| YGIRGFSTIKIFQKG  | HLA-DRB1*11:01            | Consensus (smm/nn/sturniolo) | 0.66 |
| RYGIRGFSTIKIFQK  | HLA-DRB1*11:01            | Consensus (smm/nn/sturniolo) | 0.68 |
| GIRGFSTIKIFQKGE  | HLA-DRB1*11:01            | Consensus (smm/nn/sturniolo) | 0.86 |
| SRYGIRGFSTIKIFQ  | HLA-DRB1*11:01            | Consensus (smm/nn/sturniolo) | 2.71 |
| LASRYGIRGFSTIKI  | HLA-DRB1*11:01            | Consensus (smm/nn/sturniolo) | 2.81 |
| ASRYGIRGFSTIKIF  | HLA-DRB1*11:01            | Consensus (smm/nn/sturniolo) | 3.57 |
| KGFQYRALYPFRER   | HLA-DRB1*11:01            | Consensus (smm/nn/sturniolo) | 0.78 |
| GPKGFQYRALYPFRR  | HLA-DRB1*11:01            | Consensus (smm/nn/sturniolo) | 1.2  |
| PKGFQYRALYPFRRE  | HLA-DRB1*11:01            | Consensus (smm/nn/sturniolo) | 1.2  |
| KGFQYRALYPFRER   | HLA-DRB1*01:01            | Consensus (comb.lib./smm/nn) | 3.72 |
| PKGFQYRALYPFRRE  | HLA-DRB1*01:01            | Consensus (comb.lib./smm/nn) | 4.72 |
| GPKGFQYRALYPFRR  | HLA-DRB1*01:01            | Consensus (comb.lib./smm/nn) | 5.5  |
| AGPKGFQYRALYPFR  | HLA-DRB1*11:01            | Consensus (smm/nn/sturniolo) | 8.05 |
| VTLNDMKARQKALVR  | HLA-DRB1*03:01            | Consensus (smm/nn/sturniolo) | 8.34 |
| TLNDMKARQKALVRE  | HLA-DRB1*03:01            | Consensus (smm/nn/sturniolo) | 8.34 |
| KNKKLALSSTPSNIA  | HLA-DRB1*03:01            | Consensus (smm/nn/sturniolo) | 5.64 |
| NKKLALSSTPSNIAP  | HLA-DRB1*03:01            | Consensus (smm/nn/sturniolo) | 5.96 |
| KKLALSSTPSNIAPS  | HLA-DRB1*03:01            | Consensus (smm/nn/sturniolo) | 5.96 |
| RKNKKLALSSTPSNI  | HLA-DRB1*03:01            | Consensus (smm/nn/sturniolo) | 6.06 |
| KLALSSTPSNIAPSD  | HLA-DRB1*03:01            | Consensus (smm/nn/sturniolo) | 7.33 |
| TRKNKKLALSSTPSN  | HLA-DRB1*03:01            | Consensus (smm/nn/sturniolo) | 7.97 |
| LNTGLFRIKFKEPLE  | HLA-DRB1*03:01            | Consensus (smm/nn/sturniolo) | 3.62 |
| NTGLFRIKFKEPLEN  | HLA-DRB1*03:01            | Consensus (smm/nn/sturniolo) | 3.62 |
| TGLFRIKFKEPLENL  | HLA-DRB1*03:01            | Consensus (smm/nn/sturniolo) | 3.62 |
| GLFRIKFKEPLENLI  | HLA-DRB1*03:01            | Consensus (smm/nn/sturniolo) | 3.62 |
| RNNMFEISDRFIGIY  | HLA-DRB1*03:01            | Consensus (smm/nn/sturniolo) | 3.47 |
| NMFEISDRFIGIYKT  | HLA-DRB1*03:01            | Consensus (smm/nn/sturniolo) | 3.47 |
| NNMFEISDRFIGIYK  | HLA-DRB1*03:01            | Consensus (smm/nn/sturniolo) | 3.5  |
| LRNNMFEISDRFIGI  | HLA-DRB1*03:01            | Consensus (smm/nn/sturniolo) | 3.53 |
| MFEISDRFIGIYKTY  | HLA-DRB1*03:01            | Consensus (smm/nn/sturniolo) | 6.01 |
| SLRNNMFEISDRFIG  | HLA-DRB1*03:01            | Consensus (smm/nn/sturniolo) | 6.16 |
| VFGFPVHYTDVSNMS  | HLA-DRB1*03:01            | Consensus (smm/nn/sturniolo) | 7.62 |
| GEASVVDFFKKNLEYA | HLA-DRB1*03:01            | Consensus (smm/nn/sturniolo) | 7.96 |
| EASVVDFFKKNLEYAA | HLA-DRB1*03:01            | Consensus (smm/nn/sturniolo) | 8.32 |
| LERGEASVVDFFKKNL | HLA-DRB1*03:01            | Consensus (smm/nn/sturniolo) | 8.84 |
| ARHRHLMKTLVKLSL  | HLA-DRB1*03:01            | Consensus (smm/nn/sturniolo) | 1.55 |
| RHRHLMKTLVKSLST  | HLA-DRB1*03:01            | Consensus (smm/nn/sturniolo) | 1.55 |
| MSNLAFADFCMRMYL  | HLA-DRB1*03:01            | Consensus (smm/nn/sturniolo) | 4.04 |
| LMSNLAFADFCMRMY  | HLA-DRB1*03:01            | Consensus (smm/nn/sturniolo) | 7.99 |
| PHWTNCILHEYKNLS  | HLA-DRB1*03:01            | Consensus (smm/nn/sturniolo) | 4.36 |
| HWTNCILHEYKNLST  | HLA-DRB1*03:01            | Consensus (smm/nn/sturniolo) | 4.36 |
| WTNCILHEYKNLSTS  | HLA-DRB1*03:01            | Consensus (smm/nn/sturniolo) | 4.36 |
| IRFRFFQLRLRERFF  | HLA-DQA1*05:01/DQB1*02:01 | Consensus (comb.lib./smm/nn) | 5.62 |
| FIRFRFFQLRLRERF  | HLA-DQA1*05:01/DQB1*02:01 | Consensus (comb.lib./smm/nn) | 5.71 |
| FIRFRFFQLRLRERF  | HLA-DRB1*03:01            | Consensus (smm/nn/sturniolo) | 6.18 |
| IRFRFFQLRLRERFF  | HLA-DRB1*03:01            | Consensus (smm/nn/sturniolo) | 6.18 |

|                 |                           |                              |      |
|-----------------|---------------------------|------------------------------|------|
| DFIRFRFFQLRLER  | HLA-DRB1*03:01            | Consensus (smm/nn/sturniolo) | 9.61 |
| SHTLGAASSFMRPTV | HLA-DRB1*03:01            | Consensus (smm/nn/sturniolo) | 7.06 |
| LSHTLGAASSFMRPT | HLA-DRB1*03:01            | Consensus (smm/nn/sturniolo) | 8.85 |
| VELRRNVLSPTPLA  | HLA-DRB1*03:01            | Consensus (smm/nn/sturniolo) | 1.28 |
| ELRRNVLSPTPLAN  | HLA-DRB1*03:01            | Consensus (smm/nn/sturniolo) | 1.28 |
| LLQNVELRRNVLSPT | HLA-DRB1*03:01            | Consensus (smm/nn/sturniolo) | 2.22 |
| ALLQNVELRRNVLS  | HLA-DRB1*03:01            | Consensus (smm/nn/sturniolo) | 2.58 |
| LQNVELRRNVLSPT  | HLA-DRB1*03:01            | Consensus (smm/nn/sturniolo) | 6.67 |
| QNVELRRNVLSPTP  | HLA-DRB1*03:01            | Consensus (smm/nn/sturniolo) | 7.44 |
| ESDLNSWPVAPRPLL | HLA-DRB1*03:01            | Consensus (smm/nn/sturniolo) | 8.34 |
| SDLNSWPVAPRPLLS | HLA-DRB1*03:01            | Consensus (smm/nn/sturniolo) | 8.34 |
| DLNSWPVAPRPLLSV | HLA-DRB1*03:01            | Consensus (smm/nn/sturniolo) | 8.34 |
| GLTRISIQRAQLPP  | HLA-DRB1*03:01            | Consensus (smm/nn/sturniolo) | 5.24 |
| LTRISIQRAQLPPC  | HLA-DRB1*03:01            | Consensus (smm/nn/sturniolo) | 5.24 |
| TRISIQRAQLPPCL  | HLA-DRB1*03:01            | Consensus (smm/nn/sturniolo) | 5.24 |
| RISIQRAQLPPCLP  | HLA-DRB1*03:01            | Consensus (smm/nn/sturniolo) | 5.24 |
| ISIQRAQLPPCLPS  | HLA-DRB1*03:01            | Consensus (smm/nn/sturniolo) | 5.24 |
| IQRAQLPPCLPSFR  | HLA-DRB1*03:01            | Consensus (smm/nn/sturniolo) | 7.96 |
| SIQRAQLPPCLPSF  | HLA-DRB1*03:01            | Consensus (smm/nn/sturniolo) | 8.05 |
| VRLAQLFARARPMGL | HLA-DRB1*03:01            | Consensus (smm/nn/sturniolo) | 2.12 |
| EMDFVRLAQLFARAR | HLA-DRB1*03:01            | Consensus (smm/nn/sturniolo) | 2.7  |
| KPEMDFVRLAQLFAR | HLA-DRB1*03:01            | Consensus (smm/nn/sturniolo) | 2.76 |
| PEMDFVRLAQLFARA | HLA-DRB1*03:01            | Consensus (smm/nn/sturniolo) | 2.76 |
| MDFVRLAQLFARARP | HLA-DRB1*03:01            | Consensus (smm/nn/sturniolo) | 2.84 |
| DFVRLAQLFARARPM | HLA-DRB1*03:01            | Consensus (smm/nn/sturniolo) | 2.92 |
| RLAQLFARARPMGLF | HLA-DRB1*03:01            | Consensus (smm/nn/sturniolo) | 4.38 |
| GKPEMDFVRLAQLFA | HLA-DQA1*05:01/DQB1*02:01 | Consensus (comb.lib./smm/nn) | 6.9  |
| KPEMDFVRLAQLFAR | HLA-DQA1*05:01/DQB1*02:01 | Consensus (comb.lib./smm/nn) | 7.59 |
| TGKPEMDFVRLAQLF | HLA-DRB1*03:01            | Consensus (smm/nn/sturniolo) | 7.65 |
| FVRLAQLFARARPMG | HLA-DRB1*03:01            | Consensus (smm/nn/sturniolo) | 8.09 |
| GKPEMDFVRLAQLFA | HLA-DRB1*03:01            | Consensus (smm/nn/sturniolo) | 8.34 |
| PEMDFVRLAQLFARA | HLA-DQA1*05:01/DQB1*02:01 | Consensus (comb.lib./smm/nn) | 8.38 |
| EMDFVRLAQLFARAR | HLA-DQA1*05:01/DQB1*02:01 | Consensus (comb.lib./smm/nn) | 8.38 |
| DGAWPVLLDKFVEWY | HLA-DRB1*03:01            | Consensus (smm/nn/sturniolo) | 6.18 |
| GAWPVLLDKFVEWYK | HLA-DRB1*03:01            | Consensus (smm/nn/sturniolo) | 6.18 |
| AWPVLLDKFVEWYKD | HLA-DRB1*03:01            | Consensus (smm/nn/sturniolo) | 6.18 |
| WPVLLDKFVEWYKDK | HLA-DRB1*03:01            | Consensus (smm/nn/sturniolo) | 6.18 |
| PVLLDKFVEWYKDKQ | HLA-DRB1*03:01            | Consensus (smm/nn/sturniolo) | 6.18 |
| VLLDKFVEWYKDKQM | HLA-DRB1*03:01            | Consensus (smm/nn/sturniolo) | 7.03 |
