# Supplementary material
Source: PubMed Central journal article supplement (PMC5577644)
Supplement: NIHMS892660-supplement-Supp_6.pdf [file NIHMS892660-supplement-Supp_6.pdf]

**Supplementary Information 6. Differential analysis of single cell gene expression of CD4<sup>+</sup> T cells pre**

**d. Patient 1 and 4 intersection**

| Gene     | Gene_Name                                      | Group in which gene is upregulated | Patient                  |
|----------|------------------------------------------------|------------------------------------|--------------------------|
|          |                                                |                                    | % cells expressing (Pre) |
| RPL39    | Ribosomal Protein L39                          | Post                               | 9.7                      |
| TIGIT    | T-Cell Immunoreceptor With Ig And ITIM Dom:    | Post                               | 0                        |
| PET100   | PET100 Homolog                                 | Post                               | 0                        |
| LYST     | Lysosomal Trafficking Regulator                | Post                               | 1.4                      |
| CYBA     | Cytochrome B-245 Alpha Chain                   | Post                               | 1.4                      |
| TMSB4X   | Thymosin Beta 4, X-Linked                      | Post                               | 100                      |
| MMS19    | MMS19 Homolog, Cytosolic Iron-Sulfur Assem     | Post                               | 1.4                      |
| HLA-DPA1 | Major Histocompatibility Complex, Class II, DP | Post                               | 1.4                      |
| TTC7A    | Tetratricopeptide Repeat Domain 7A             | Post                               | 1.4                      |
| TOX      | Thymocyte Selection Associated High Mobility   | Post                               | 2.8                      |
| METTL8   | Methyltransferase Like 8                       | Post                               | 1.4                      |
| PCMT1    | Protein-L-Isoaspartate (D-Aspartate) O-Methyl  | Post                               | 2.8                      |
| DAXX     | Death Domain Associated Protein                | Post                               | 2.8                      |
| SMARCB1  | SWI/SNF Related, Matrix Associated, Actin Dep  | Post                               | 1.4                      |
| DYNC1I2  | Dynein Cytoplasmic 1 Intermediate Chain 2      | Post                               | 2.8                      |
| ST8SIA1  | ST8 Alpha-N-Acetyl-Neuraminide Alpha-2,8-Sia   | Post                               | 4.2                      |
| RASSF2   | Ras Association Domain Family Member 2         | Post                               | 2.8                      |
| BTBD2    | BTB Domain Containing 2                        | Post                               | 1.4                      |
| CISH     | Cytokine Inducible SH2 Containing Protein      | Post                               | 2.8                      |
| TMSB10   | Thymosin Beta 10                               | Post                               | 88.9                     |
| CNOT6    | CCR4-NOT Transcription Complex Subunit 6       | Post                               | 2.8                      |
| MARCKSL1 | MARCKS Like 1                                  | Post                               | 2.8                      |
| XPNPEP1  | X-Prolyl Aminopeptidase 1                      | Post                               | 2.8                      |
| SRF      | Serum Response Factor                          | Post                               | 2.8                      |
| CARS2    | Cysteinyl-TRNA Synthetase 2, Mitochondrial (F  | Post                               | 4.2                      |
| TOB2     | Transducer Of ERBB2, 2                         | Post                               | 5.6                      |
| C7orf73  |                                                | Post                               | 1.4                      |
| PRR5L    | Proline Rich 5 Like                            | Post                               | 4.2                      |
| HDAC6    | Histone Deacetylase 6                          | Post                               | 4.2                      |
| CD52     | CD52 Molecule                                  | Post                               | 81.9                     |
| PFN1     | Profilin 1                                     | Post                               | 75                       |
| SYNGAP1  | Synaptic Ras GTPase Activating Protein 1       | Post                               | 4.2                      |
| SYT11    | Synaptotagmin 11                               | Post                               | 1.4                      |
| MB21D1   | Mab-21 Domain Containing 1                     | Post                               | 1.4                      |
| ARHGAP35 | Rho GTPase Activating Protein 35               | Post                               | 4.2                      |
| MRPL14   | Mitochondrial Ribosomal Protein L14            | Post                               | 4.2                      |
| ELAVL1   | ELAV Like RNA Binding Protein 1                | Post                               | 4.2                      |
| LRRC8D   | Leucine Rich Repeat Containing 8 Family Mem    | Post                               | 1.4                      |
| SNX27    | Sorting Nexin Family Member 27                 | Post                               | 4.2                      |
| TMEM204  | Transmembrane Protein 204                      | Post                               | 2.8                      |

|               |                                                 |      |      |
|---------------|-------------------------------------------------|------|------|
| CDC40         | Cell Division Cycle 40                          | Post | 5.6  |
| CFL1          | Cofilin 1                                       | Post | 73.6 |
| ATG3          | Autophagy Related 3                             | Post | 5.6  |
| GGCX          | Gamma-Glutamyl Carboxylase                      | Post | 1.4  |
| RDX           | Radixin                                         | Post | 5.6  |
| ACTB          | Actin Beta                                      | Post | 93.1 |
| COLGALT1      | Collagen Beta(1-O)Galactosyltransferase 1       | Post | 2.8  |
| ZNF592        | Zinc Finger Protein 592                         | Post | 4.2  |
| IMPDH1        | Inosine Monophosphate Dehydrogenase 1           | Post | 2.8  |
| RPS19BP1      | Ribosomal Protein S19 Binding Protein 1         | Post | 5.6  |
| BRE           | Brain And Reproductive Organ-Expressed (TNF     | Post | 2.8  |
| IFITM2        | Interferon Induced Transmembrane Protein 2      | Post | 47.2 |
| MYEF2         | Myelin Expression Factor 2                      | Post | 2.8  |
| EIF4E         | Eukaryotic Translation Initiation Factor 4E     | Post | 4.2  |
| MYL6          | Myosin Light Chain 6                            | Post | 59.7 |
| HLA-A         | Major Histocompatibility Complex, Class I, A    | Post | 97.2 |
| NPDC1         | Neural Proliferation, Differentiation And Contr | Post | 4.2  |
| FAM89B        | Family With Sequence Similarity 89 Member B     | Post | 5.6  |
| RTN3          | Reticulon 3                                     | Post | 4.2  |
| HDAC10        | Histone Deacetylase 10                          | Post | 2.8  |
| RPA2          | Replication Protein A2                          | Post | 5.6  |
| C4orf48       |                                                 | Post | 1.4  |
| C16orf87      |                                                 | Post | 4.2  |
| TOR1A         | Torsin Family 1 Member A                        | Post | 1.4  |
| RCBTB2        | RCC1 And BTB Domain Containing Protein 2        | Post | 4.2  |
| CTBS          | Chitobiase                                      | Post | 6.9  |
| RP11-343N15.5 |                                                 | Post | 2.8  |
| CEP192        | Centrosomal Protein 192                         | Post | 4.2  |
| CPEB4         | Cytoplasmic Polyadenylation Element Binding     | Post | 4.2  |
| CCDC50        | Coiled-Coil Domain Containing 50                | Post | 1.4  |
| FRG1          | FSHD Region Gene 1                              | Post | 4.2  |
| LUZP1         | Leucine Zipper Protein 1                        | Post | 4.2  |
| LDLRAD4       | Low Density Lipoprotein Receptor Class A Dorr   | Post | 5.6  |
| MTRNR2L1      | MT-RNR2-Like 1                                  | Post | 25   |
| ARPC2         | Actin Related Protein 2/3 Complex Subunit 2     | Post | 65.3 |
| ASNA1         | ArsA Arsenite Transporter, ATP-Binding, Homoc   | Post | 2.8  |
| ATP6V1B2      | ATPase H+ Transporting V1 Subunit B2            | Post | 4.2  |
| PIAS2         | Protein Inhibitor Of Activated STAT 2           | Post | 4.2  |
| DTX3L         | Deltex E3 Ubiquitin Ligase 3L                   | Post | 5.6  |
| FAM160B2      | Family With Sequence Similarity 160 Member      | Post | 5.6  |
| TRIM26        | Tripartite Motif Containing 26                  | Post | 5.6  |
| FBXO45        | F-Box Protein 45                                | Post | 4.2  |
| IARS          | Isoleucyl-TRNA Synthetase                       | Post | 5.6  |
| STAMBP        | STAM Binding Protein                            | Post | 2.8  |
| LANCL1        | LanC Like 1                                     | Post | 5.6  |
| PIGT          | Phosphatidylinositol Glycan Anchor Biosynthes   | Post | 4.2  |
| IFNAR1        | Interferon Alpha And Beta Receptor Subunit 1    | Post | 4.2  |

|            |                                               |      |      |
|------------|-----------------------------------------------|------|------|
| C11orf48   |                                               | Post | 4.2  |
| HLA-C      | Major Histocompatibility Complex, Class I, C  | Post | 97.2 |
| HSPBP1     | HSPA (Hsp70) Binding Protein 1                | Post | 2.8  |
| KLF6       | Kruppel Like Factor 6                         | Post | 81.9 |
| CSNK2A1    | Casein Kinase 2 Alpha 1                       | Post | 6.9  |
| C12orf75   |                                               | Post | 5.6  |
| EZH2       | Enhancer Of Zeste 2 Polycomb Repressive Cor   | Post | 4.2  |
| KLF7       | Kruppel Like Factor 7                         | Post | 8.3  |
| API5       | Apoptosis Inhibitor 5                         | Post | 6.9  |
| SP2        | Sp2 Transcription Factor                      | Post | 5.6  |
| AHNAK      | AHNAK Nucleoprotein                           | Post | 50   |
| AL592183.1 |                                               | Post | 4.2  |
| LPCAT4     | Lysophosphatidylcholine Acyltransferase 4     | Post | 2.8  |
| UQCRC1     | Ubiquinol-Cytochrome C Reductase Core Prote   | Post | 4.2  |
| CD74       | CD74 Molecule                                 | Post | 30.6 |
| GDPD5      | Glycerophosphodiester Phosphodiesterase Do    | Post | 4.2  |
| DMXL1      | Dmx Like 1                                    | Post | 5.6  |
| ZEB2       | Zinc Finger E-Box Binding Homeobox 2          | Post | 2.8  |
| CPEB2      | Cytoplasmic Polyadenylation Element Binding   | Post | 0    |
| WHSC1      | Wolf-Hirschhorn Syndrome Candidate 1          | Post | 4.2  |
| BAHD1      | Bromo Adjacent Homology Domain Containin      | Post | 5.6  |
| PREP       | Prolyl Endopeptidase                          | Post | 1.4  |
| SLAMF1     | Signaling Lymphocytic Activation Molecule Far | Post | 5.6  |
| IDH3G      | Isocitrate Dehydrogenase 3 (NAD(+)) Gamma     | Post | 5.6  |
| PBDC1      | Polysaccharide Biosynthesis Domain Containin  | Post | 4.2  |
| TRAPPC2    | Trafficking Protein Particle Complex 2        | Post | 2.8  |
| HCP5       | HLA Complex P5 (Non-Protein Coding)           | Post | 5.6  |
| NDUFS7     | NADH:Ubiquinone Oxidoreductase Core Subur     | Post | 4.2  |
| MRPL24     | Mitochondrial Ribosomal Protein L24           | Post | 4.2  |
| EIF4H      | Eukaryotic Translation Initiation Factor 4H   | Post | 5.6  |
| NIPSNAP1   | Nipsnap Homolog 1 (C. Elegans)                | Post | 5.6  |
| S100A4     | S100 Calcium Binding Protein A4               | Post | 59.7 |
| C18orf8    |                                               | Post | 2.8  |
| KIF20B     | Kinesin Family Member 20B                     | Post | 6.9  |
| TWISTNB    | TWIST Neighbor                                | Post | 8.3  |
| SLC39A13   | Solute Carrier Family 39 Member 13            | Post | 5.6  |
| DFFA       | DNA Fragmentation Factor Subunit Alpha        | Post | 6.9  |
| DPYSL2     | Dihydropyrimidinase Like 2                    | Post | 4.2  |
| TP53INP1   | Tumor Protein P53 Inducible Nuclear Protein 1 | Post | 6.9  |
| AP2S1      | Adaptor Related Protein Complex 2 Sigma 1 Su  | Post | 5.6  |
| MRPL51     | Mitochondrial Ribosomal Protein L51           | Post | 4.2  |
| BFAR       | Bifunctional Apoptosis Regulator              | Post | 8.3  |
| GPALPP1    | GPALPP Motifs Containing 1                    | Post | 2.8  |
| DDX58      | DEXD/H-Box Helicase 58                        | Post | 2.8  |
| FAM222B    | Family With Sequence Similarity 222 Member    | Post | 6.9  |
| GMCL1      | Germ Cell-Less, Spermatogenesis Associated 1  | Post | 5.6  |
| PSMD14     | Proteasome 26S Subunit, Non-ATPase 14         | Post | 5.6  |

|           |                                                 |      |      |
|-----------|-------------------------------------------------|------|------|
| XPO4      | Exportin 4                                      | Post | 6.9  |
| FIBP      | FGF1 Intracellular Binding Protein              | Post | 2.8  |
| KIAA1468  | KIAA1468                                        | Post | 8.3  |
| MTOR      | Mechanistic Target Of Rapamycin                 | Post | 5.6  |
| MON1B     | MON1 Homolog B, Secretory Trafficking Assoc     | Post | 6.9  |
| BCR       | BCR, RhoGEF And GTPase Activating Protein       | Post | 4.2  |
| GSTK1     | Glutathione S-Transferase Kappa 1               | Post | 43.1 |
| ANO6      | Anoctamin 6                                     | Post | 6.9  |
| ORAI2     | ORAI Calcium Release-Activated Calcium Modu     | Post | 5.6  |
| COTL1     | Coactosin Like F-Actin Binding Protein 1        | Post | 41.7 |
| BRAP      | BRCA1 Associated Protein                        | Post | 5.6  |
| TMEM14C   | Transmembrane Protein 14C                       | Post | 6.9  |
| RBM15     | RNA Binding Motif Protein 15                    | Post | 6.9  |
| PYCARD    | PYD And CARD Domain Containing                  | Post | 5.6  |
| DDX1      | DEAD/H-Box Helicase 1                           | Post | 6.9  |
| SAT2      | Spermidine/Spermine N1-Acetyltransferase Fa     | Post | 5.6  |
| SCAP      | SREBF Chaperone                                 | Post | 5.6  |
| ARPC1B    | Actin Related Protein 2/3 Complex Subunit 1B    | Post | 40.3 |
| USO1      | USO1 Vesicle Transport Factor                   | Post | 6.9  |
| RPL17     | Ribosomal Protein L17                           | Post | 4.2  |
| HIVEP3    | Human Immunodeficiency Virus Type I Enhanc      | Post | 5.6  |
| MAF       | MAF BZIP Transcription Factor                   | Post | 25   |
| RPS7      | Ribosomal Protein S7                            | Post | 73.6 |
| INPPL1    | Inositol Polyphosphate Phosphatase Like 1       | Post | 6.9  |
| GCDH      | Glutaryl-CoA Dehydrogenase                      | Post | 2.8  |
| LAP3      | Leucine Aminopeptidase 3                        | Post | 8.3  |
| ATP5E     | ATP Synthase, H+ Transporting, Mitochondrial    | Post | 62.5 |
| RRP7A     | Ribosomal RNA Processing 7 Homolog A            | Post | 4.2  |
| MIAT      | Myocardial Infarction Associated Transcript (N  | Post | 19.4 |
| PGM2L1    | Phosphoglucomutase 2 Like 1                     | Post | 5.6  |
| MOB2      | MOB Kinase Activator 2                          | Post | 5.6  |
| GTF3C1    | General Transcription Factor IIIC Subunit 1     | Post | 2.8  |
| CEP164    | Centrosomal Protein 164                         | Post | 6.9  |
| LINC00892 | Long Intergenic Non-Protein Coding RNA 892      | Post | 2.8  |
| 42987     |                                                 | Post | 52.8 |
| SCAND1    | SCAN Domain Containing 1                        | Post | 2.8  |
| IFITM1    | Interferon Induced Transmembrane Protein 1      | Post | 51.4 |
| F5        | Coagulation Factor V                            | Post | 0    |
| PPFIA1    | PTPRF Interacting Protein Alpha 1               | Post | 5.6  |
| CXCR4     | C-X-C Motif Chemokine Receptor 4                | Pre  | 98.6 |
| ELL2      | Elongation Factor For RNA Polymerase II 2       | Pre  | 20.8 |
| NELL2     | Neural EGFL Like 2                              | Pre  | 19.4 |
| EEF1A1    | Eukaryotic Translation Elongation Factor 1 Alpl | Pre  | 66.7 |
| MTRNR2L12 | MT-RNR2-Like 12                                 | Pre  | 90.3 |
| ILKAP     | ILK Associated Serine/Threonine Phosphatase     | Pre  | 26.4 |
| SATB1     | SATB Homeobox 1                                 | Pre  | 50   |
| AEN       | Apoptosis Enhancing Nuclease                    | Pre  | 12.5 |

|         |                                                |     |      |
|---------|------------------------------------------------|-----|------|
| CAPN7   | Calpain 7                                      | Pre | 11.1 |
| BMI1    | BMI1 Proto-Oncogene, Polycomb Ring Finger      | Pre | 11.1 |
| DCTN6   | Dynactin Subunit 6                             | Pre | 13.9 |
| TAF13   | TATA-Box Binding Protein Associated Factor 13  | Pre | 11.1 |
| JMY     | Junction Mediating And Regulatory Protein, P53 | Pre | 36.1 |
| ARHGAP5 | Rho GTPase Activating Protein 5                | Pre | 15.3 |
| DENND6A | DENN Domain Containing 6A                      | Pre | 11.1 |
| DBF4    | DBF4 Zinc Finger                               | Pre | 15.3 |
| SZT2    | Seizure Threshold 2 Homolog (Mouse)            | Pre | 11.1 |

---

Pre-vaccination and tetramer-positive CD4<sup>+</sup> T cells post-vaccination for Patients 1 and 4

| Patient 1                 |                  | Patient 4                          |                          |                           |
|---------------------------|------------------|------------------------------------|--------------------------|---------------------------|
| % cells expressing (Post) | Adjusted P-value | Group in which gene is upregulated | % cells expressing (Pre) | % cells expressing (Post) |
| 76.8                      | 3.00E-08         | Pre                                | 54.2                     | 23.1                      |
| 33.3                      | 5.80E-07         | Post                               | 8.5                      | 29.7                      |
| 20.3                      | 6.60E-06         | Post                               | 3.4                      | 22                        |
| 23.2                      | 0.00014          | Post                               | 1.7                      | 19.8                      |
| 23.2                      | 0.00036          | Post                               | 8.5                      | 22                        |
| 98.6                      | 0.00049          | Post                               | 100                      | 100                       |
| 20.3                      | 0.00067          | Post                               | 6.8                      | 17.6                      |
| 15.9                      | 0.00067          | Post                               | 8.5                      | 28.6                      |
| 15.9                      | 0.00069          | Post                               | 1.7                      | 8.8                       |
| 24.6                      | 0.00075          | Post                               | 0                        | 30.8                      |
| 14.5                      | 0.0014           | Post                               | 3.4                      | 15.4                      |
| 26.1                      | 0.0014           | Post                               | 6.8                      | 12.1                      |
| 20.3                      | 0.0014           | Pre                                | 16.9                     | 3.3                       |
| 15.9                      | 0.0014           | Post                               | 1.7                      | 11                        |
| 15.9                      | 0.0014           | Post                               | 5.1                      | 12.1                      |
| 26.1                      | 0.0015           | Post                               | 0                        | 20.9                      |
| 27.5                      | 0.0015           | Post                               | 11.9                     | 20.9                      |
| 14.5                      | 0.0016           | Post                               | 6.8                      | 11                        |
| 14.5                      | 0.0024           | Pre                                | 15.3                     | 1.1                       |
| 100                       | 0.0025           | Post                               | 93.2                     | 100                       |
| 20.3                      | 0.003            | Post                               | 0                        | 11                        |
| 26.1                      | 0.0032           | Post                               | 1.7                      | 18.7                      |
| 18.8                      | 0.0032           | Post                               | 3.4                      | 8.8                       |
| 18.8                      | 0.0033           | Post                               | 6.8                      | 8.8                       |
| 21.7                      | 0.0034           | Post                               | 1.7                      | 16.5                      |
| 24.6                      | 0.0034           | Post                               | 8.5                      | 24.2                      |
| 15.9                      | 0.0035           | Post                               | 5.1                      | 14.3                      |
| 24.6                      | 0.0036           | Post                               | 1.7                      | 11                        |
| 20.3                      | 0.0037           | Pre                                | 16.9                     | 4.4                       |
| 97.1                      | 0.0041           | Post                               | 74.6                     | 95.6                      |
| 97.1                      | 0.0046           | Post                               | 88.1                     | 100                       |
| 21.7                      | 0.0047           | Post                               | 5.1                      | 11                        |
| 13                        | 0.0052           | Post                               | 3.4                      | 14.3                      |
| 11.6                      | 0.0052           | Post                               | 0                        | 13.2                      |
| 18.8                      | 0.0054           | Post                               | 5.1                      | 28.6                      |
| 17.4                      | 0.0055           | Post                               | 5.1                      | 15.4                      |
| 14.5                      | 0.0056           | Post                               | 5.1                      | 15.4                      |
| 15.9                      | 0.0059           | Post                               | 5.1                      | 12.1                      |
| 17.4                      | 0.006            | Post                               | 6.8                      | 12.1                      |
| 15.9                      | 0.0061           | Pre                                | 16.9                     | 5.5                       |

|      |        |      |      |      |
|------|--------|------|------|------|
| 21.7 | 0.0063 | Post | 6.8  | 17.6 |
| 95.7 | 0.0063 | Post | 79.7 | 96.7 |
| 20.3 | 0.0065 | Post | 5.1  | 23.1 |
| 15.9 | 0.0069 | Post | 5.1  | 11   |
| 17.4 | 0.0073 | Post | 3.4  | 14.3 |
| 97.1 | 0.0075 | Post | 94.9 | 98.9 |
| 15.9 | 0.0076 | Post | 0    | 13.2 |
| 11.6 | 0.0077 | Post | 5.1  | 16.5 |
| 20.3 | 0.008  | Post | 5.1  | 14.3 |
| 14.5 | 0.0082 | Post | 6.8  | 14.3 |
| 15.9 | 0.0083 | Post | 5.1  | 15.4 |
| 81.2 | 0.0088 | Post | 57.6 | 74.7 |
| 11.6 | 0.0091 | Post | 3.4  | 9.9  |
| 15.9 | 0.0095 | Post | 1.7  | 11   |
| 88.4 | 0.0096 | Post | 59.3 | 85.7 |
| 100  | 0.0097 | Post | 98.3 | 100  |
| 13   | 0.01   | Post | 1.7  | 45.1 |
| 29   | 0.01   | Post | 5.1  | 24.2 |
| 17.4 | 0.011  | Post | 6.8  | 14.3 |
| 15.9 | 0.011  | Post | 6.8  | 18.7 |
| 21.7 | 0.011  | Pre  | 11.9 | 6.6  |
| 14.5 | 0.012  | Post | 3.4  | 13.2 |
| 13   | 0.012  | Post | 0    | 16.5 |
| 13   | 0.013  | Post | 0    | 14.3 |
| 17.4 | 0.013  | Post | 5.1  | 11   |
| 17.4 | 0.013  | Post | 5.1  | 13.2 |
| 11.6 | 0.013  | Post | 5.1  | 12.1 |
| 21.7 | 0.013  | Post | 3.4  | 12.1 |
| 13   | 0.015  | Post | 5.1  | 14.3 |
| 11.6 | 0.015  | Post | 3.4  | 16.5 |
| 20.3 | 0.015  | Post | 3.4  | 16.5 |
| 14.5 | 0.015  | Post | 3.4  | 17.6 |
| 23.2 | 0.017  | Post | 3.4  | 19.8 |
| 71   | 0.017  | Post | 0    | 11   |
| 89.9 | 0.017  | Post | 69.5 | 93.4 |
| 13   | 0.018  | Post | 6.8  | 15.4 |
| 14.5 | 0.018  | Post | 8.5  | 13.2 |
| 15.9 | 0.018  | Post | 6.8  | 19.8 |
| 17.4 | 0.019  | Post | 0    | 11   |
| 15.9 | 0.02   | Pre  | 15.3 | 5.5  |
| 17.4 | 0.02   | Post | 5.1  | 14.3 |
| 13   | 0.02   | Post | 3.4  | 8.8  |
| 21.7 | 0.02   | Post | 10.2 | 18.7 |
| 11.6 | 0.02   | Post | 5.1  | 13.2 |
| 14.5 | 0.021  | Post | 11.9 | 17.6 |
| 11.6 | 0.021  | Post | 5.1  | 16.5 |
| 15.9 | 0.022  | Post | 5.1  | 15.4 |

|      |       |      |      |      |
|------|-------|------|------|------|
| 13   | 0.023 | Post | 5.1  | 9.9  |
| 98.6 | 0.023 | Post | 98.3 | 100  |
| 14.5 | 0.023 | Post | 1.7  | 9.9  |
| 97.1 | 0.024 | Post | 76.3 | 94.5 |
| 17.4 | 0.024 | Post | 3.4  | 15.4 |
| 21.7 | 0.024 | Post | 1.7  | 19.8 |
| 13   | 0.025 | Post | 6.8  | 16.5 |
| 17.4 | 0.025 | Pre  | 18.6 | 6.6  |
| 17.4 | 0.026 | Post | 3.4  | 19.8 |
| 13   | 0.026 | Post | 3.4  | 12.1 |
| 84.1 | 0.027 | Post | 67.8 | 86.8 |
| 11.6 | 0.027 | Post | 5.1  | 16.5 |
| 13   | 0.027 | Pre  | 13.6 | 5.5  |
| 13   | 0.028 | Post | 3.4  | 20.9 |
| 71   | 0.028 | Post | 49.2 | 72.5 |
| 11.6 | 0.029 | Post | 10.2 | 14.3 |
| 14.5 | 0.03  | Post | 1.7  | 13.2 |
| 17.4 | 0.031 | Post | 1.7  | 18.7 |
| 10.1 | 0.032 | Post | 1.7  | 18.7 |
| 13   | 0.032 | Post | 5.1  | 14.3 |
| 11.6 | 0.033 | Post | 3.4  | 8.8  |
| 13   | 0.034 | Post | 3.4  | 9.9  |
| 20.3 | 0.035 | Post | 5.1  | 16.5 |
| 20.3 | 0.036 | Post | 6.8  | 14.3 |
| 14.5 | 0.037 | Post | 5.1  | 14.3 |
| 13   | 0.037 | Post | 5.1  | 13.2 |
| 13   | 0.037 | Pre  | 15.3 | 7.7  |
| 14.5 | 0.037 | Post | 6.8  | 13.2 |
| 17.4 | 0.041 | Post | 0    | 11   |
| 20.3 | 0.042 | Post | 3.4  | 15.4 |
| 11.6 | 0.042 | Post | 3.4  | 12.1 |
| 85.5 | 0.042 | Post | 71.2 | 86.8 |
| 11.6 | 0.042 | Post | 5.1  | 15.4 |
| 23.2 | 0.048 | Post | 5.1  | 37.4 |
| 17.4 | 0.048 | Post | 6.8  | 22   |
| 14.5 | 0.051 | Post | 3.4  | 12.1 |
| 14.5 | 0.051 | Post | 3.4  | 13.2 |
| 13   | 0.052 | Post | 3.4  | 8.8  |
| 20.3 | 0.052 | Post | 6.8  | 15.4 |
| 14.5 | 0.052 | Post | 3.4  | 9.9  |
| 14.5 | 0.053 | Post | 3.4  | 15.4 |
| 26.1 | 0.053 | Post | 5.1  | 11   |
| 10.1 | 0.054 | Pre  | 11.9 | 4.4  |
| 14.5 | 0.055 | Pre  | 10.2 | 2.2  |
| 15.9 | 0.056 | Post | 5.1  | 14.3 |
| 13   | 0.056 | Post | 10.2 | 30.8 |
| 13   | 0.056 | Post | 1.7  | 14.3 |



|      |          |      |      |      |
|------|----------|------|------|------|
| 13   | 0.058    | Post | 1.7  | 18.7 |
| 13   | 0.059    | Post | 3.4  | 11   |
| 15.9 | 0.059    | Post | 3.4  | 9.9  |
| 14.5 | 0.06     | Post | 3.4  | 14.3 |
| 23.2 | 0.062    | Post | 5.1  | 18.7 |
| 10.1 | 0.063    | Post | 3.4  | 16.5 |
| 71   | 0.064    | Post | 39   | 76.9 |
| 14.5 | 0.064    | Post | 3.4  | 12.1 |
| 14.5 | 0.065    | Post | 5.1  | 17.6 |
| 78.3 | 0.066    | Post | 40.7 | 78   |
| 13   | 0.068    | Post | 5.1  | 14.3 |
| 11.6 | 0.068    | Post | 3.4  | 12.1 |
| 21.7 | 0.068    | Post | 1.7  | 11   |
| 13   | 0.069    | Post | 3.4  | 14.3 |
| 18.8 | 0.07     | Post | 3.4  | 22   |
| 11.6 | 0.07     | Post | 3.4  | 11   |
| 13   | 0.072    | Pre  | 13.6 | 9.9  |
| 76.8 | 0.075    | Post | 49.2 | 78   |
| 18.8 | 0.079    | Pre  | 20.3 | 8.8  |
| 14.5 | 0.081    | Post | 5.1  | 15.4 |
| 13   | 0.081    | Post | 6.8  | 18.7 |
| 59.4 | 0.081    | Post | 13.6 | 71.4 |
| 91.3 | 0.081    | Post | 69.5 | 89   |
| 13   | 0.082    | Post | 5.1  | 9.9  |
| 11.6 | 0.082    | Post | 5.1  | 11   |
| 21.7 | 0.083    | Post | 5.1  | 15.4 |
| 85.5 | 0.085    | Post | 55.9 | 82.4 |
| 21.7 | 0.085    | Post | 6.8  | 15.4 |
| 55.1 | 0.086    | Post | 20.3 | 73.6 |
| 11.6 | 0.086    | Post | 5.1  | 12.1 |
| 18.8 | 0.088    | Post | 1.7  | 11   |
| 11.6 | 0.092    | Post | 6.8  | 9.9  |
| 17.4 | 0.094    | Post | 3.4  | 18.7 |
| 11.6 | 0.096    | Post | 0    | 15.4 |
| 79.7 | 0.097    | Post | 71.2 | 90.1 |
| 13   | 0.098    | Post | 6.8  | 18.7 |
| 76.8 | 0.098    | Post | 54.2 | 93.4 |
| 10.1 | 0.099    | Post | 1.7  | 9.9  |
| 13   | 0.099    | Post | 6.8  | 13.2 |
| 65.2 | 4.20E-09 | Post | 83.1 | 96.7 |
| 2.9  | 0.00035  | Post | 0    | 20.9 |
| 2.9  | 0.00083  | Pre  | 22   | 5.5  |
| 36.2 | 0.0028   | Post | 16.9 | 71.4 |
| 89.9 | 0.011    | Post | 78   | 86.8 |
| 7.2  | 0.013    | Post | 5.1  | 17.6 |
| 15.9 | 0.013    | Pre  | 67.8 | 18.7 |
| 7.2  | 0.021    | Post | 5.1  | 14.3 |

|      |       |      |      |      |
|------|-------|------|------|------|
| 2.9  | 0.039 | Pre  | 13.6 | 8.8  |
| 7.2  | 0.043 | Pre  | 15.3 | 6.6  |
| 7.2  | 0.044 | Post | 10.2 | 26.4 |
| 4.3  | 0.053 | Post | 1.7  | 13.2 |
| 11.6 | 0.065 | Post | 16.9 | 48.4 |
| 10.1 | 0.065 | Pre  | 27.1 | 7.7  |
| 8.7  | 0.066 | Post | 6.8  | 24.2 |
| 5.8  | 0.067 | Post | 5.1  | 27.5 |
| 8.7  | 0.087 | Pre  | 16.9 | 8.8  |

---

---

---

**Adjusted P-value**

---

0.068  
0.076  
0.0023  
0.0016  
0.045  
2.30E-05  
0.051  
0.068  
0.085  
5.50E-06  
0.0012  
0.093  
0.011  
0.031  
0.012  
3.70E-05  
0.043  
0.034  
0.00024  
6.60E-06  
0.0022  
0.0022  
0.018  
0.063  
0.002  
0.051  
0.0061  
0.087  
0.002  
9.90E-06  
2.00E-06  
0.092  
0.01  
0.0008  
0.0059  
0.019  
0.02  
0.03  
0.084  
0.0048

0.073  
0.072  
0.052  
0.052  
0.0096  
0.0096  
0.00032  
0.0082  
0.018  
0.087  
0.04  
0.067  
0.074  
0.009  
0.055  
0.068  
2.00E-06  
0.0076  
0.064  
0.085  
0.059  
0.021  
8.10E-05  
0.00053  
0.075  
0.03  
0.03  
0.011  
0.049  
0.043  
0.0095  
0.051  
0.012  
0.0042  
9.60E-06  
0.099  
0.091  
0.01  
0.002  
0.017  
0.028  
0.097  
0.088  
0.074  
0.071  
0.006  
0.0097

0.088  
0.0023  
0.016  
0.002  
0.0034  
0.0012  
0.096  
0.051  
0.0016  
0.018  
0.097  
0.018  
0.073  
0.01  
0.032  
0.08  
0.002  
0.0011  
0.0015  
0.031  
0.072  
0.016  
0.015  
0.08  
0.048  
0.013  
0.029  
0.048  
0.0026  
0.0042  
0.031  
0.068  
0.036  
0.00096  
0.081  
0.027  
0.0096  
0.056  
0.048  
0.055  
0.013  
0.055  
0.033  
0.092  
0.038  
0.039  
0.011

0.0008  
0.039  
0.05  
0.024  
0.058  
0.0074  
0.04  
0.091  
0.014  
0.0059  
0.017  
0.0095  
0.0022  
0.013  
0.0022  
0.067  
0.055  
0.093  
0.007  
0.029  
0.064  
2.00E-06  
0.087  
0.063  
0.076  
0.018  
0.061  
0.051  
0.00032  
0.01  
0.011  
0.077  
0.006  
8.10E-05  
0.096  
0.085  
5.90E-05  
0.029  
0.029  
0.0046  
1.70E-05  
0.0022  
0.001  
0.05  
0.022  
0.0007  
0.029

0.077

0.077

0.017

0.0032

0.097

0.076

0.03

0.0022

0.072

---
